# Supplementary material for: Development of a regionalized dynamic weighting method for the environmental impact of alternative protein sources
Source: Frontiers journal article supplement (doi:10.3389/fsufs.2024.1294390), 2024-01-29
Supplement: Table_1.XLSX [file Table_1.XLSX]

## Sheet: 1. Title & Table of contents
Development of a regionalized dynamic weighting method for the environmental impact of alternative protein sources
Sheet 1	Manuscript title and table of contents	Original manuscript title and table of contents in the excel sheet
Sheet 2	Data collection/Calculation	The sheet contains all the data collected and the calculations
	Global warming GHG emission (2000-2016)	the data for the environmental impact indicator of global warming is collected in the form of green house gas emission and converted from tons to kg for a total of 148 countries
	Water use (10^9) m3 (total water withdrawl) (2000-2016)	the data for the environmental impact indicator of water use is collected and converted from m3 to litres for a total of 148 countries
	Energy use (TWh) (2000-2016)	the data for the environmental impact indicator of energy use is collected and converted from terra watt hours to mega joules
	Arable land use (hectares) (2000-2016)	the data for the environmenatl impact indicator of arable land use is collected and converted from hectares to m2
	Average of the environemntal impacts of conventional & alternative protein	The data for the environmental impacts (global average) from conventional & alrernative protein sources were collecetd from various literature sources which are mentioned in the sheet
	Regionalised environmental impacts (conventional protein sources)	The data for the environmental impacts (regionalised) from conventional were collected from the literature source which is mentioned in the sheet
	Environmental impacts (alternative protein sources)	The data for the environmental impacts of alternative protein sources were collected from the literature source which is mentioned in the sheet
Sheet 3	Normalized values and RIW	The collected data for the total environmental impacts in the chosen countries were normalised by arable land area and population
Sheet 4	RIW & product´s eco-potential GWP (RIW weighted)	the relative impact weights for the environmental impact indicator of global warming is calculated by dividing the total green house gas emission with the arable land use and total population in each country. Similarly the food product´s eco-potential points were calculated by dividing the absolute environemntal impacts from food product´s with the country´s (RIW) for global warming
Sheet 5	RIW & product´s eco-potential WU (RIW weighted)	the relative impact weights for the environmental impact indicator of water use is calculated by dividing the total water withdrawl with the arable land use and total population in each country. Similarly the food product´s eco-potential points were calculated by dividing the absolute water use from food product´s with the country´s (RIW) for water use
Sheet 6	RIW & product´s eco-potential EU (RIW weighted)	the relative impact weights for the environmental impact indicator of energy use is calculated by dividing the total water withdrawl with the arable land use and total population in each country. Similarly the food product´s eco-potential points were calculated by dividing the absolute water use from food products with the country´s (RIW) for energy use
Sheet 7	RIW & product´s eco-potential LU (RIW weighted)	the relative impact weights for the environmental impact indicator of land use is calculated by dividing the total arble land use with the total population in each country. Similarly the food product´s eco-potential points were calculated by dividing the absolute land use from food products with the country´s (RIW) for land use
Sheet 8	Beef integrated eco-potential points	beef eco-potential points were calculated by adding beef´s eco-potential points for the four environmental impact indicators for global warming, water use, energy use and land use
Sheet 9	Cheese integrated eco-potential points	cheese eco-potential points were calculated by adding cheese eco-potential points for the four environmental impact indicators for global warming, water use, energy use and land use
Sheet 10	Peas integrated eco-potential points	Peas eco-potential points were calculated by adding peas eco-potential points for the four environmental impact indicators for global warming, water use, energy use and land use
Sheet 11	Pig meat integrated eco-potential points	Pig meat eco-potential points were calculated by adding pig meat eco-potential points for the four environmental impact indicators for global warming, water use, energy use and land use
Sheet 12	Egg integrated eco-potential points	Egg eco-potential points were calculated by adding egg eco-potential points for the four environmental impact indicators for global warming, water use, energy use and land use
Sheet 13	Poultry Meat integrated eco-potential points	Poultry meat eco-potential points were calculated by adding pultry meat eco-potential points for the four environmental impact indicators for global warming, water use, energy use and land use
Sheet 14	Ground Nuts integrated eco-potential points	Groundnut eco-potential points were calculated by adding groundnut eco-potential points for the four environmental impact indicators for global warming, water use, energy use and land use
Sheet 15	Fish integrated eco-potential points	Fish eco-potential points were calculated by adding fish eco-potential points for the four environmental impact indicators for global warming, water use, energy use and land use
Sheet 16	Soybeans integrated eco-potential points	Soybeans (tofu) eco-potential points were calculated by adding soybeans (tofu) eco-potential points for the four environmental impact indicators for global warming, water use, energy use and land use
Sheet 17	Cricket integrated eco-potential points	Cricket eco-potential points were calculated by adding cricket eco-potential points for the four environmental impact indicators for global warming, water use, energy use and land use
Sheet 18	Mealworms integrated eco-potential points	Mealworms eco-potential points were calculated by adding mealworms eco-potential points for the four environmental impact indicators for global warming, water use, energy use and land use
Sheet 19	Cultured meat integrated eco-potential points	Cultured meat eco-potential points were calculated by adding cultured meat eco-potential points for the four environmental impact indicators for global warming, water use, energy use and land use
Sheet 20	Black Solider Fly integrated eco-potential points	beef´s eco-potential points were calculated by adding beef´s eco-potential points for the four environmental impact indicators for global warming, water use, energy use and land use
Sheet 21	House Fly integrated eco-potential points	House fly eco-potential points were calculated by adding house fly eco-potential points for the four environmental impact indicators for global warming, water use, energy use and land use
Sheet 22	Chlorella integrated eco-potential points	Chlorella eco-potential points were calculated by adding chlorella eco-potential points for the four environmental impact indicators for global warming, water use, energy use and land use
Sheet 23	Spirulina integrated eco-potential points	Spirulina eco-potential points were calculated by adding spirulina eco-potential points for the four environmental impact indicators for global warming, water use, energy use and land use
Sheet 24	Comparision graphs (EP & absolute impacts)	The absoulte impacts of conventional protein sources (literature values) are compared with the integeraged eco-potential of conventional protein sources (calculated by our developed methodology)

## Sheet: 2. Data CollectionCalculation
Conventional Protein Sources	Land Use (m2/nutritional unit (1000g))	GHG Emissions (kg CO2eq/NU (1000g), IPCC 2013 incl CC feedbacks)	Water Use (L/NU (1000g)	Energy-Use (MJ/NU (1000g)	Data Sources (GHG, Water, Land)	Data Sources (Energy Use)
Peas	34	4	125780	348	Poore & Nemecek, 2018, S. 988	Department for Environment Food and Rural Affairs, 2010
soybeans (tofu)	22	20	31960	19	Poore & Nemecek, 2018, S. 988	(Kurniawati et al., 2019)
Groundnut	35	12	236050	182	Poore & Nemecek, 2018, S. 988	Firouzi, Saeed & Aminpanah, Hashem. (2012)
Beef	1640	500	174190	132.2	Poore & Nemecek, 2018, S. 988	Department for Environment Food and Rural Affairs, 2010
Cheese	400	110	819070	250.2	Poore & Nemecek, 2018, S. 988	Department for Environment Food and Rural Affairs, 2010
Pig meat	110	76	413270	123.33	Poore & Nemecek, 2018, S. 988	Department for Environment Food and Rural Affairs, 2010
Eggs	57	42	162060	224.5	Poore & Nemecek, 2018, S. 988	Department for Environment Food and Rural Affairs, 2010
Poultry Meat	71	57	81860	92.22	Poore & Nemecek, 2018, S. 988	Department for Environment Food and Rural Affairs, 2010
Fish (farmed)	37	60	182290	221.07 (Salmon, Tuna)	Poore & Nemecek, 2018, S. 988	Department for Environment Food and Rural Affairs, 2010
Average	267.333	97.8889	247392	171.431
Alternative Protein Sources	GHG (KgCO2eq/1000g Proteins)	Land Use (m2/1000g Proteins)	Water Use (L/1000g Proteins)	Energy Use (MJ/1000g Proteins)	GHG (reference)	Land Use (reference)	Water use (reference)	Energy Use (reference)
Crickets (Thailand) future scenario	2.35	155	21132	96	(Halloran et al., 2018)	(ENVIRONMENTAL POTENTIAL OF INSECTS AS FOOD PROTEIN SOURCE, 2018)	(ENVIRONMENTAL POTENTIAL OF INSECTS AS FOOD PROTEIN SOURCE, 2018)	(ENVIRONMENTAL POTENTIAL OF INSECTS AS FOOD PROTEIN SOURCE, 2018)
Mealworms	12.2409	72.6252	23000	1842.69	(Parodi et al., 2018)	(Parodi et al., 2018)	(Miglietta et al., 2015)	(Parodi et al., 2018)
Black soldier fly	14.7906	37.3409	2549.39	103.241	(Parodi et al., 2018)	(Parodi et al., 2018)	(Bava et al., 2019), (Bessa et al., 2020)	(Parodi et al., 2018)
Housefly	2.65584	0.0586462	194.57	40.5664	(Parodi et al., 2018)	(Parodi et al., 2018)	(Roffeis et al., 2015)	(Parodi et al., 2018)
Cultured Meat	30.8956	14.6896	1707.69	437.478	(Parodi et al., 2018)	(Parodi et al., 2018)	(H. L. Tuomisto & Teixeira de Mattos, 2011)	(Parodi et al., 2018)
Chlorella	128.096	7.74883	7391	2306.48	(Parodi et al., 2018)	(Parodi et al., 2018)	(Martins et al., 2018)	(Parodi et al., 2018)
Spirulina	112.892	4.75987	1900	1842.69	(Parodi et al., 2018)	(Parodi et al., 2018)	(Ye et al., 2018)	(Parodi et al., 2018)
Average	43.4172	41.7461	8267.81	952.736
Calculations for environmental impacts from conventional & alternative protein sources according to 1000 g (1kg) of protein
Beef	Cheese	Peas
Beef (land use)	Cheese (land use)	Peas (land use)
Beef (100g protein) = 164m2	Cheese (100g protein) = 40m2	Peas (100g protein) = 3.4 m2
Beef (1000g protein) = (164*1000)/100	Cheese (1000g protein) = (40*1000)/100	Peas (1000g protein) = (3.4*1000)/100
Beef (1000g protein) = 1640m2	Cheese (1000g protein) = 400 m2	Peas (1000g protein) = 34 m2
Beef (GHG emissions)	Cheese (GHG emissions)	Peas (GHG emissions)
Beef (100g protein) = 50 kgCO2eq	Cheese (100g protein) = 11 kgCO2eq	Peas (100g protein) = 0.4 kgCO2eq
Beef (1000g protein) = (50*1000)/100	Cheese (1000g protein) = (11*1000)/100	Peas (1000g protein) = (0.4*1000)/100
Beef (1000g protein) = 500 kgCO2eq	Cheese (1000g protein) = 110 kgCO2eq	Peas (1000g protein) = 4 kgCO2eq
Beef (stress-weighted water use)	Cheese (stress-weighted water use)	Peas (stress-weighted water use)
Beef (100g protein) = 17.419 L	Cheese (100g protein) = 81907 L	Peas (100g protein) = 12578 L
Beef (1000g protein) = (17.419*1000)/100	Cheese (1000g protein) = (81907*1000)/100	Peas (1000g protein) = (12578*1000)/100
Beef (1000g protein) = 174190	Cheese (1000g protein) = 819070 L	Peas (1000g protein) = 125780 L
Beef (energy use)	Cheese (energy use)	Peas (energy use)
Beef (1kg) = 260g protein	Cheese (100g protein) = 51.3 MJ	Peas (1kg) = 50g protein
Beef (260g protein) = 34.4 MJ	Cheese (1000g protein) = (51.3*1000)/100	Peas (50g protein) = 17.4MJ
Beef (1000g protein) = (34.4*1000)/260	Cheese (1000g protein) = 513 MJ	Peas (1000g protein) = (17.4*1000)/50
Beef (1000g protein) = 132.20MJ		Peas (1000g protein) = 348MJ
Pig meat	Eggs	Poultry meat
Pig meat (land use)	Eggs (land use)	Poultry meat (land use)
Pig meat (100g protein) = 11 m2	Eggs (100g protein) = 5.7 m2	Poultry meat (100g protein) = 7.1 m2
Pig meat (1000g protein) = (11*1000)/100	Eggs (1000g protein) = (5.7*1000)/100	Poultry meat (1000g protein) = (7.1*1000)/100
Pig meat (1000g protein) = 110m2	Eggs (1000g protein) = 57 m2	Poultry meat (1000g protein) = 71 m2
Pig meat (GHG emissions)	Eggs (GHG emissions)	Poultry meat (GHG emissions)
Pig meat (100g proteins) = 7.6 KgCO2eq	Eggs (100g proteins) = 4.2 KgCO2eq	Poultry meat (100g protein) = 5.7 KgCO2eq
Pig meat (1000g proteins) = (7.6*1000)/100	Eggs (1000g proteins) = (4.2*1000)/100	Poultry meat (1000g protein) = (5.7*1000)/100
Pig meat (1000g proteins) = 76 KgCO2eq	Eggs (1000g proteins) = 42 KgCO2eq	Poultry meat (1000g protein) = 57 KgCO2eq
Pig meat (stress-weighted water use)	Eggs (stress-weighted water use)	Poultry Meat (stress-weighted water use)
Pig meat (100g protein) = 41327 L	Eggs (100g protein) = 16206 L	Poultry Meat (100g protein) = 8186 L
Pig meat (1000g protein) = (41327*1000)/100	Eggs (1000g protein) = (16206*1000)/100	Poultry Meat (1000g protein) = (8186*1000)/100
Pig meat (1000g protein) = 413270 L	Eggs (1000g protein) = 162060 L	Poultry Meat (1000g protein) = 81860 L
Pig meat (energy use)	Eggs (energy use)	Poultry meat (energy use)
Pig meat (1kg) = 270g protein	Eggs (1kg) = 130g Protein	Poultry meat (Chicken) (1kg) = 270g Proteins
Pig meat (270g protein) = 33.3MJ	Eggs (130g protein) = 29.2MJ	Poultry meat (270g protein) = 24.9 MJ
Pig meat (1000g protein) = (33.3*1000)/270	Eggs (1000g protein) = (29.2*1000)/130	Poultry meat (1000g protein) = (24.9*1000)/270
Pig meat (1000g protein) = 123.33MJ	Eggs (1000g protein) = 224.615 MJ	Poultry meat (1000g protein) = 92.22 MJ
Groundnuts	Fish	Soybeans (tofu)
Groundnuts (land use)	Fish (land use)	Soybeans (tofu) (land use)
Groundnuts (100g protein) = 3.5 m2	Fish (100g protein) = 3.7 m2	Soybeans (tofu) (100g proteins) = 2.2 m2
Groundnuts (1000g protein) = (3.5*1000)/100	Fish (1000g protein) = (3.7*1000)/100	Soybeans (tofu) (1000g protein) = (2.2*1000)/100
Groundnuts (1000g protein) = 35 m2	Fish (1000g protein) = 37 m2	Soybeans (tofu) (1000g protein) = 22 m2
Groundnuts (GHG emissions)	Fish (GHG emissions)	Soybeans (tofu) (GHG emissions)
Groundnuts (100g proteins) = 1.2 kgCO2eq	Fish (100g protein) = 6.0 KgCO2eq	Soybeans (tofu) (100g protein) = 2.0 KgCO2eq
Groundnuts (1000g protein) = (1.2*1000)/100	Fish (1000g protein) = (6.0*1000)/100	Soybeans (tofu) (1000g protein) = (2.0*1000)/100
Groundnuts (1000g protein) = 12 KgCO2eq	Fish (1000g protein) = 60 KgCO2eq	Soybeans (tofu) (1000g protein) = 20 KgCO2eq
Groundnuts (stress-weighted water use)	Fish (stress-weighted water use)	Soybeans (tofu) (stress-weighted water use)
Groundnuts (100g protein) = 23605 L	Fish (100g protein) = 18229 L	Soybeans (tofu) (100g protein) = 3196 L
Groundnuts (1000g protein) = (23605*1000)/100	Fish (1000g protein) = (18229*1000)/100	Soybeans (tofu) (1000g protein) = (3196*1000)/100
Groundnuts (1000g protein) = 236050 L	Fish (1000g protein) = 182290 L	Soybeans (tofu) (1000g protein) = 31960 L
Groundnuts (energy use)	Fish (energy use)	Soybeans (tofu) (energy ese)
Groundnuts (1kg) = 260g protein	Fish (1kg Salmon) = 200g protein	Soybeans (tofu) (1kg) = 80g protein
Groundnuts (260g protein) = 4.74 MJ	Fish (1kg Tuna) = 280g Protein	Soybeans (tofu) (80g protein) = 1.5269 MJ
Groundnuts (1000g protein) = (4.74*1000)/260	Fish (Salmon 200g protein) = 57.0 MJ	Soybeans (tofu) (1000g protein) = (1.5269*1000)/100
Groundnuts (1000g proteins) = 18.23 MJ	Fish (Tuna 280g protein) = 44.0 MJ	Soybeans (tofu) (1000g protein) = 19,08 MJ
	Fish (Salmon 1000g protein) = (57.0*1000)/200
	Fish (Salmon 1000g protein) = 285 MJ
	Fish (Tuna 1000g protein) = (44.0*1000)/280
	Fish (Tuna 1000g Protein) = 157.14 MJ
	Fish (average energy use) = (285+157.14)/2= 221.07 MJ
Crickets	Mealworms	Black soldier fly
Crickets (land use)	Mealworms (land use)	Black soldier fly (land use)
Crickets (1000g protein) = 155m2	Mealworms (50g protein) = 3.631261839 m2	Black soldier fly (50g protein) = 1.867042667 m2
Crickets (GHG emission)	Mealworms (1000g protein) = (3.63*1000)/1000	Black soldier Fly (1000g protein) = (1.87*1000)/50
Crickets (100g) = 60g protein	Mealworms (1000g protein) = 72.63 m2	Black soldier fly (1000g protein) = 37.34 m2
Crickets (1kg) = 600g Protein	Mealworms (GHG emissions)	Black soldier fly (GHG emission)
Crickets (600g protein) = 1.41 kgCO2eq	Mealworms (50g protein) = 0.612046722 kgCO2eq	Black soldier fly (50g protein) = 0.73953068 kgCO2eq
Crickets (1000g protein) = (1.41*1000)/600	Mealworms (1000g protein) = (0.61*1000)/50	Black soldier fly (1000g protein) = (0.74*1000)/50
Crickets (1000g protein) = 2.35 kgCO2eq	Mealworms (1000g protein) = 12.24 kgCO2eq	Black soldier fly (1000g protein) = 14.79 kgCO2eq
Crickets (water use)	Mealworms (water use)	Black soldier fly (water use)
Cricket (1000g Protein) = 2132 L	Mealworms (1g protein) = 23 L	Hen diet = 1.26m3/kg of larvae dry weight
Crickets (energy use)	Mealworms (1000g protein) = (23*1000)/1	Maize distillers = 1.16m3/kg of larvae dry weight
Crickets (1kg) = 600g protein	Mealworms (1000g protein) = 23000L	Okara = 0.75m3/kg of larvae dry weight
Crickets (600g protein) = 57,6 MJ	Mealworms (energy use)	Brewer´s grains = 1.06m3/kg of larvae dry weight
Crickets (1000g protein) = (57.6*1000)/600	Mealworms (50g protein) = 4.596209734 MJ	Average water resource depletion (m3) = (1.26+1.16+0.75+1.06)/4
Crickets (1000g protein) = 96 MJ	Mealworms (1000g protein) = (4.60*1000)/50	Average water resource depletion = 1.057 m3 = 1057L
	Mealworms (1000g Protein) = 91.92 MJ	100g DM black soldier fly = 30-53g (41.5g) protein
		1000g DM black soldier fly = (41.5*1000)/100
		1000g DM black soldier fly = 414g of protein
		415g protein (DM black soldier fly) = 1058L
		1000g protein (black soldier fly) = (1058*1000)/415
		1000g protein (black soldier fly) = 2549.39L
		Black soldier fly (energy use)
		Black soldier fly (50g protein) = 5.162066871 MJ
		Black soldier Fly (1000g protein) = (5.16*1000)/50
		Black soldier fly (1000g protein) = 103.24 MJ
House fly	Cultured meat	Chlorella
House fly (land use)	Cultured meat (land use)	Chlorella (land use)
House Fly (50g protein) = 0.002932311 m2	Cultured Meat (50g protein) = 0.734480311 m2	Chlorella (50g protein) = 0.387441329 m2
House Fly (1000g protein) = (0.0029*1000)/50	Cultured Meat (1000g protein) = (0.73*1000)/50	Chlorella (1000g protein) = (0.39*1000)/50
House Fly (1000g protein) = 0.06 m2	Cultured Meat (1000g protein) = 14.69 m2	Chlorella (1000g protein) = 7.75 m2
House Fly (GHG emissions)	Cultured Meat (GHG emission)	Chlorella (GHG emissions)
House fly (50g protein) = 0.1327918 kgCO2eq	Cultured Meat (50g protein) = 1.544781171 kgCO2eq	Chlorella (50g protein) = 6.404807202 kgCO2eq
House fly (1000g protein) = (0.133*1000)/50	Cultured Meat (1000g protein) = (1.54*1000)/50	Chlorella (1000g protein) = (6.4*1000)/50
House fly (1000g protein) = 2.66 kgCO2eq	Cultured Meat (1000g protein) = 30.90 kgCO2eq	Chlorella (1000g protein) = 128.10 kgCO2eq
House fly (water use)	Cultured meat (water use)	Chlorella (water use)
129g fly egg = (5.74+4.15)/2 = 4,945 L	Cultured meat (1000kg) = 444000 L	Chlorella (100g) = 58g protein
1000g fly egg = (4,945*1000)/129	Cultured meat (1kg) = 444 L	Chlorella (1000g) = 580g protein
1000g fly egg = 38.33L	Cultured meat (1kg) = 260g protein (assumed same as beef)	580g protein = 2.4-6.8m3 (4.6m3) or 4600L
1kg house fly = 197g protein (average)	Cultured meat (260g protein) = 444 L	1000g protein = (4600*1000)/580
197g protein = 38.33 L	Cultured meat (1000g protein) = (444*1000)/260	1000g protein = 7931L
1000g protein = (38.33*1000)/197	Cultured meat (1000g protein) = 1707.69 L	Chlorella (energy use)
1000g protein = 194.57 L	Cultured meat (energy use)	Chlorella (50g protein) = 115.3240312 MJ
House fly (energy use)	Cultured meat (50g protein) = 21.87390135	Chlorella (1000g protein) = (115.32*1000)/50
House Fly (50g protein) = 2.028321437 MJ	Cultured meat (1000g protein) = (21.87*1000)/50	Chlorella (1000g protein) = 2306.48 MJ
House Fly (1000g protein) = (2.03*1000)/50	Cultured meat (1000g Protein) = 437.48 MJ
House Fly (1000g protein) = 40.57 MJ
Spirulina
Spirulina (land use)
Spirulina (50g protein) = 0.237993456 m2
Spirulina (1000g protein) = (0.24*1000)/50
Spirulina (1000g Protein) = 4.76 m2
Spirulina (GHG emissions)
Spirulina (50g protein) = 5.644576605 kgCO2eq
Spirulina (1000g protein) = (5.64*1000)/50
Spirulina (1000g protein) = 112.89 kgCO2eq
Spirulina (water use)
Spirulina (1000g protein) = 800-3000 L
Spirulina (1000g protein) = (800+3000)/2
Spirulina (1000g protein) = 1900L
Spirulina (energy use)
Spirulina (50g protein) = 92.13456678 MJ
Spirulina (1000g protein) = (92.13*1000)/50
Spirulina (1000g protein) = 1842.69 MJ
Global warming (annual GHG emissions, tonnes)	China	United States	India	Russian Federation	Japan	Germany	Islamic Republic of Iran	Saudi Arabia	Indonesia	Canada	Mexico	South Africa	Brazil	Turkey	Australia	United Kingdom	Poland	France	Italy	Kazakhstan	Afghanistan	Albania	Algeria	Angola	Antigua and Barbuda	Argentina	Armenia	Austria	Azerbaijan	Bahrain	Barbados	Belarus	Belgium	Belize	Benin	Bolivia	Botswana	Brunei	Bulgaria	Burkina Faso	Burundi	Cameroon	Central African Republic	Chad	Chile	Colombia	Comoros	Congo	Croatia
2000	4276120000	6495120000	1664020000	2418990000	1174850000	922880000	466630000	291530000	1406680000	731300000	556170000	345420000	1646960000	262940000	608160000	679530000	356570000	474740000	472220000	148460000	15050000	8400000	127650000	161840000	610000	366340000	6130000	66220000	59130000	23980000	3510000	66680000	134840000	5580000	23310000	110950000	68300000	18670000	46380000	28770000	12240000	197560000	66260000	34720000	59240000	286060000	380000	19770000	13760000
2001	4452290000	6439610000	1569360000	2329980000	1189350000	970630000	480140000	297910000	1663980000	903030000	550630000	380990000	1899730000	232390000	700990000	687320000	345710000	425190000	469300000	148420000	13470000	9030000	125230000	143580000	650000	383270000	6300000	75320000	59660000	24890000	3550000	58020000	135090000	7130000	18460000	109950000	55530000	18620000	46640000	25190000	9200000	196880000	60880000	30420000	62760000	309040000	420000	26530000	14550000
2002	4762980000	6321650000	1591500000	2381150000	1225230000	952160000	504890000	318210000	2199080000	981570000	557000000	396800000	1945010000	242670000	688480000	668260000	338060000	417550000	477710000	164970000	16100000	9720000	132440000	164500000	690000	386170000	5920000	77000000	60600000	26020000	3540000	64650000	127830000	9570000	19700000	118540000	148320000	18750000	43610000	26520000	10170000	195310000	57130000	34250000	63710000	308210000	430000	22970000	15540000
2003	5385870000	6353160000	1634280000	2552060000	1231650000	951080000	534120000	331490000	1822690000	1001570000	584260000	417930000	1958830000	254510000	620390000	677150000	350130000	422770000	495790000	176440000	16780000	10090000	138300000	181040000	740000	408490000	6370000	82930000	58280000	27060000	3580000	60280000	131300000	10170000	19550000	114410000	89410000	19790000	48420000	29100000	10380000	203040000	64800000	36170000	6.463e+07	317930000	450000	35800000	16600000
2004	6132260000	6500270000	1728850000	2443690000	1219100000	931260000	571070000	349910000	2205430000	961050000	583840000	445750000	2005240000	260870000	664400000	670800000	354020000	419890000	506070000	193920000	16350000	10150000	142190000	193160000	780000	436710000	6780000	82530000	59580000	27380000	3620000	61440000	1.2995e+08	6880000	19450000	133000000	30240000	19420000	47140000	30020000	9590000	199660000	59650000	37440000	70000000	319580000	460000	40170000	16350000
2005	6856610000	6477600000	1803320000	2492300000	1224800000	906560000	609880000	367360000	1912930000	971700000	611100000	447080000	2015480000	273390000	622460000	664400000	355740000	420500000	507320000	206010000	17090000	9920000	147710000	191800000	810000	428510000	7430000	82420000	63560000	30490000	3670000	62510000	125900000	9280000	20920000	128550000	79240000	19430000	47220000	30740000	8860000	206730000	61910000	39530000	70880000	316150000	530000	51250000	1.622e+07
2006	7483960000	6388860000	1936950000	2379410000	1103330000	918190000	658380000	390250000	2681880000	882120000	626780000	447830000	1420950000	277830000	637390000	661660000	286660000	434960000	495920000	227440000	20740000	8750000	145930000	165860000	960000	462740000	7950000	82820000	60100000	32930000	3760000	58370000	123680000	7520000	21400000	133330000	41570000	21300000	51140000	32500000	3140000	197700000	60350000	56930000	71460000	310830000	500000	47720000	19020000
2007	8102460000	6601130000	2078820000	2352000000	1144400000	888290000	696800000	412810000	2057190000	894320000	648260000	468370000	1466130000	307700000	628770000	645620000	286630000	428160000	488700000	235740000	24780000	9060000	153160000	196180000	1020000	465580000	8570000	80370000	58760000	34060000	3770000	55540000	119450000	9800000	22490000	142360000	83790000	20420000	55520000	33500000	2690000	202370000	61960000	57570000	79860000	318810000	420000	43360000	20590000
2008	8.39681e+09	6267350000	2170720000	2616540000	1.06532e+09	892660000	710220000	450540000	2043340000	877950000	678720000	502330000	1454360000	306300000	597420000	624230000	280380000	422460000	475470000	282100000	31390000	8530000	157230000	173970000	1070000	482380000	9140000	80160000	6.632e+07	36410000	4040000	59680000	121290000	8.36e+06	22040000	135580000	46180000	20330000	53010000	34020000	3440000	204680000	64730000	57150000	84530000	317540000	450000	37900000	19730000
2009	8989400000	5865860000	2355660000	2281070000	1002880000	834120000	734520000	470820000	2475020000	800900000	662870000	482210000	1433190000	309800000	617920000	568840000	264550000	405180000	429390000	251270000	37720000	8640000	166450000	180680000	1140000	469510000	8050000	72870000	67230000	37030000	4040000	57120000	114360000	7130000	22850000	133100000	28280000	20080000	45610000	35020000	3810000	202260000	58070000	55400000	81790000	321640000	470000	35640000	17180000
2010	9788640000	6111810000	2457760000	2401660000	1055530000	864720000	740760000	515510000	2049350000	884340000	665540000	490010000	1540260000	319510000	579140000	581780000	282520000	409040000	437790000	277170000	44750000	8850000	167180000	186780000	1170000	451700000	7830000	78380000	71510000	38960000	3950000	61380000	121560000	9290000	23480000	169750000	37590000	19090000	47270000	36190000	3920000	201390000	62100000	56890000	86460000	325720000	520000	43120000	16540000
2011	10781300000	6235850000	2800430000	2478200000	1261050000	812510000	817820000	534470000	2276710000	756740000	681940000	476140000	1307810000	332180000	617790000	538110000	360530000	353480000	427740000	294110000	58620000	9290000	179590000	220880000	1080000	460120000	8260000	75850000	74010000	39680000	3930000	84510000	109550000	7190000	23680000	142710000	47860000	17600000	53100000	34310000	7410000	200930000	6.646e+07	57230000	4720000	183900000	500000	51940000	22130000
2012	11106420000	5936090000	2943690000	2541380000	1308390000	826220000	825980000	568120000	2319980000	791740000	672080000	496320000	1353140000	346170000	617860000	559760000	353510000	356760000	412410000	294070000	67050000	8950000	189600000	185500000	1100000	478030000	9180000	73200000	75300000	40880000	3930000	88330000	108860000	3310000	23620000	138620000	34180000	17690000	47340000	34920000	7240000	199180000	63840000	57970000	2620000	182280000	520000	49220000	20100000
2013	11570950000	6056310000	2994460000	2413770000	1335180000	844050000	846810000	585750000	2294460000	857340000	667840000	505110000	1368380000	337450000	529260000	541180000	348120000	357600000	381690000	307530000	76290000	9010000	193450000	202250000	1110000	466520000	9130000	73790000	74980000	43760000	3930000	87040000	109670000	7640000	24070000	137590000	66340000	17490000	42310000	35940000	7870000	209020000	67210000	57210000	280000	192090000	550000	50940000	19000000
2014	11592120000	6097750000	3163700000	2414840000	1297470000	803720000	858830000	629140000	2732160000	819390000	655740000	5.2054e+08	1413430000	362310000	537950000	500980000	335050000	324660000	362620000	290050000	86600000	9510000	203810000	183480000	1130000	467820000	9110000	70160000	75230000	45900000	3750000	88040000	103620000	3580000	24570000	138600000	34320000	17400000	44780000	36110000	7600000	202930000	67550000	56720000	5680000	200850000	550000	32200000	18260000
2015	11584220000	5966460000	3177200000	2316810000	1266660000	808910000	853360000	660580000	2779090000	861770000	677890000	495390000	1409940000	369100000	536330000	484630000	338940000	331300000	373600000	285710000	93540000	9300000	212510000	206030000	1350000	470550000	8730000	71490000	73870000	46970000	4260000	84200000	108550000	5210000	25420000	141570000	131850000	1.658e+07	47260000	37280000	7350000	207500000	70830000	96870000	570000	199710000	590000	47890000	18850000
2016	11576870000	5833490000	3235660000	2391380000	1263870000	808730000	867960000	663580000	2229000000	779270000	688380000	497390000	1379380000	395950000	519090000	461540000	349760000	329600000	369630000	289020000	96590000	9190000	210090000	180120000	1380000	482080000	9460000	71850000	73980000	47070000	4350000	80700000	107350000	4860000	26530000	150940000	69990000	16800000	44070000	38630000	7740000	208380000	75730000	101970000	3740000	232000000	600000	49770000	18940000
Global warming GHG emission per year in kg	China	United States	India	Russian Federation	Japan	Germany	Islamic Republic of Iran	Saudi Arabia	Indonesia	Canada	Mexico	South Africa	Brazil	Turkey	Australia	United Kingdom	Poland	France	Italy	Kazakhstan	Afghanistan	Albania	Algeria	Angola	Antigua and Barbuda	Argentina	Armenia	Austria	Azerbaijan	Bahrain	Barbados	Belarus	Belgium	Belize	Benin	Bolivia	Botswana	Brunei	Bulgaria	Burkina Faso	Burundi	Cameroon	Central African Republic	Chad	Chile	Colombia	Comoros	Congo	Croatia
2000	4276120000000	6495120000000	1664020000000	2418990000000	1174850000000	922880000000	466630000000	291530000000	1406680000000	731300000000	556170000000	345420000000	1646960000000	262940000000	608160000000	679530000000	356570000000	474740000000	472220000000	148460000000	15050000000	8400000000	127650000000	161840000000	610000000	366340000000	6130000000	66220000000	59130000000	23980000000	3510000000	66680000000	134840000000	5580000000	23310000000	110950000000	68300000000	18670000000	46380000000	28770000000	12240000000	197560000000	66260000000	34720000000	59240000000	286060000000	380000000	19770000000	13760000000
2001	4452290000000	6439610000000	1569360000000	2329980000000	1189350000000	970630000000	480140000000	297910000000	1663980000000	903030000000	550630000000	380990000000	1899730000000	232390000000	700990000000	687320000000	345710000000	425190000000	469300000000	148420000000	13470000000	9030000000	125230000000	143580000000	650000000	383270000000	6300000000	75320000000	59660000000	24890000000	3550000000	58020000000	135090000000	7130000000	18460000000	109950000000	55530000000	18620000000	46640000000	25190000000	9200000000	196880000000	60880000000	30420000000	62760000000	309040000000	420000000	26530000000	14550000000
2002	4762980000000	6321650000000	1591500000000	2381150000000	1225230000000	952160000000	504890000000	318210000000	2199080000000	981570000000	557000000000	396800000000	1945010000000	242670000000	688480000000	668260000000	338060000000	417550000000	477710000000	164970000000	16100000000	9720000000	132440000000	164500000000	690000000	386170000000	5920000000	77000000000	60600000000	26020000000	3540000000	64650000000	127830000000	9570000000	19700000000	118540000000	148320000000	18750000000	43610000000	26520000000	10170000000	195310000000	57130000000	34250000000	63710000000	308210000000	430000000	22970000000	15540000000
2003	5385870000000	6353160000000	1634280000000	2552060000000	1231650000000	951080000000	534120000000	331490000000	1822690000000	1001570000000	584260000000	417930000000	1958830000000	254510000000	620390000000	677150000000	350130000000	422770000000	495790000000	176440000000	16780000000	10090000000	138300000000	181040000000	740000000	408490000000	6370000000	82930000000	58280000000	27060000000	3580000000	60280000000	131300000000	10170000000	19550000000	114410000000	89410000000	19790000000	48420000000	29100000000	10380000000	203040000000	64800000000	36170000000	64630000000	317930000000	450000000	35800000000	16600000000
2004	6132260000000	6500270000000	1728850000000	2443690000000	1219100000000	931260000000	571070000000	349910000000	2205430000000	961050000000	583840000000	445750000000	2005240000000	260870000000	664400000000	670800000000	354020000000	419890000000	506070000000	193920000000	16350000000	10150000000	142190000000	193160000000	780000000	436710000000	6780000000	82530000000	59580000000	27380000000	3620000000	61440000000	129950000000	6880000000	19450000000	133000000000	30240000000	19420000000	47140000000	30020000000	9590000000	199660000000	59650000000	37440000000	70000000000	319580000000	460000000	40170000000	16350000000
2005	6856610000000	6477600000000	1803320000000	2492300000000	1224800000000	906560000000	609880000000	367360000000	1912930000000	971700000000	611100000000	447080000000	2015480000000	273390000000	622460000000	664400000000	355740000000	420500000000	507320000000	206010000000	17090000000	9920000000	147710000000	191800000000	810000000	428510000000	7430000000	82420000000	63560000000	30490000000	3670000000	62510000000	125900000000	9280000000	20920000000	128550000000	79240000000	19430000000	47220000000	30740000000	8860000000	206730000000	61910000000	39530000000	70880000000	316150000000	530000000	51250000000	16220000000
2006	7483960000000	6388860000000	1936950000000	2379410000000	1103330000000	918190000000	658380000000	390250000000	2681880000000	882120000000	626780000000	447830000000	1420950000000	277830000000	637390000000	661660000000	286660000000	434960000000	495920000000	227440000000	20740000000	8750000000	145930000000	165860000000	960000000	462740000000	7950000000	82820000000	60100000000	32930000000	3760000000	58370000000	123680000000	7520000000	21400000000	133330000000	41570000000	21300000000	51140000000	32500000000	3140000000	197700000000	60350000000	56930000000	71460000000	310830000000	500000000	47720000000	19020000000
2007	8102460000000	6601130000000	2078820000000	2352000000000	1144400000000	888290000000	696800000000	412810000000	2057190000000	894320000000	648260000000	468370000000	1466130000000	307700000000	628770000000	645620000000	286630000000	428160000000	488700000000	235740000000	24780000000	9060000000	153160000000	196180000000	1020000000	465580000000	8570000000	80370000000	58760000000	34060000000	3770000000	55540000000	119450000000	9800000000	22490000000	142360000000	83790000000	20420000000	55520000000	33500000000	2690000000	202370000000	61960000000	57570000000	79860000000	318810000000	420000000	43360000000	20590000000
2008	8396810000000	6267350000000	2170720000000	2616540000000	1065320000000	892660000000	710220000000	450540000000	2043340000000	877950000000	678720000000	502330000000	1454360000000	306300000000	597420000000	624230000000	280380000000	422460000000	475470000000	282100000000	31390000000	8530000000	157230000000	173970000000	1070000000	482380000000	9140000000	80160000000	66320000000	36410000000	4040000000	59680000000	121290000000	8360000000	22040000000	135580000000	46180000000	20330000000	53010000000	34020000000	3440000000	204680000000	64730000000	57150000000	84530000000	317540000000	450000000	37900000000	19730000000
2009	8989400000000	5865860000000	2355660000000	2281070000000	1002880000000	834120000000	734520000000	470820000000	2475020000000	800900000000	662870000000	482210000000	1433190000000	309800000000	617920000000	568840000000	264550000000	405180000000	429390000000	251270000000	37720000000	8640000000	166450000000	180680000000	1140000000	469510000000	8050000000	72870000000	67230000000	37030000000	4040000000	57120000000	114360000000	7130000000	22850000000	133100000000	28280000000	20080000000	45610000000	35020000000	3810000000	202260000000	58070000000	55400000000	81790000000	321640000000	470000000	35640000000	17180000000
2010	9788640000000	6111810000000	2457760000000	2401660000000	1055530000000	864720000000	740760000000	515510000000	2049350000000	884340000000	665540000000	490010000000	1540260000000	319510000000	579140000000	581780000000	282520000000	409040000000	437790000000	277170000000	44750000000	8850000000	167180000000	186780000000	1170000000	451700000000	7830000000	78380000000	71510000000	38960000000	3950000000	61380000000	121560000000	9290000000	23480000000	169750000000	37590000000	19090000000	47270000000	36190000000	3920000000	201390000000	62100000000	56890000000	86460000000	325720000000	520000000	43120000000	16540000000
2011	10781300000000	6235850000000	2800430000000	2478200000000	1261050000000	812510000000	817820000000	534470000000	2276710000000	756740000000	681940000000	476140000000	1307810000000	332180000000	617790000000	538110000000	360530000000	353480000000	427740000000	294110000000	58620000000	9290000000	179590000000	220880000000	1080000000	460120000000	8260000000	75850000000	74010000000	39680000000	3930000000	84510000000	109550000000	7190000000	23680000000	142710000000	47860000000	17600000000	53100000000	34310000000	7410000000	200930000000	66460000000	57230000000	4720000000	183900000000	500000000	51940000000	22130000000
2012	11106420000000	5936090000000	2943690000000	2541380000000	1308390000000	826220000000	825980000000	568120000000	2319980000000	791740000000	672080000000	496320000000	1353140000000	346170000000	617860000000	559760000000	353510000000	356760000000	412410000000	294070000000	67050000000	8950000000	189600000000	185500000000	1100000000	478030000000	9180000000	73200000000	75300000000	40880000000	3930000000	88330000000	108860000000	3310000000	23620000000	138620000000	34180000000	17690000000	47340000000	34920000000	7240000000	199180000000	63840000000	57970000000	2620000000	182280000000	520000000	49220000000	20100000000
2013	11570950000000	6056310000000	2994460000000	2413770000000	1335180000000	844050000000	846810000000	585750000000	2294460000000	857340000000	667840000000	505110000000	1368380000000	337450000000	529260000000	541180000000	348120000000	357600000000	381690000000	307530000000	76290000000	9010000000	193450000000	202250000000	1110000000	466520000000	9130000000	73790000000	74980000000	43760000000	3930000000	87040000000	109670000000	7640000000	24070000000	137590000000	66340000000	17490000000	42310000000	35940000000	7870000000	209020000000	67210000000	57210000000	280000000	192090000000	550000000	50940000000	19000000000
2014	11592120000000	6097750000000	3163700000000	2414840000000	1297470000000	803720000000	858830000000	629140000000	2732160000000	819390000000	655740000000	520540000000	1413430000000	362310000000	537950000000	500980000000	335050000000	324660000000	362620000000	290050000000	86600000000	9510000000	203810000000	183480000000	1130000000	467820000000	9110000000	70160000000	75230000000	45900000000	3750000000	88040000000	103620000000	3580000000	24570000000	138600000000	34320000000	17400000000	44780000000	36110000000	7600000000	202930000000	67550000000	56720000000	5680000000	200850000000	550000000	32200000000	18260000000
2015	11584220000000	5966460000000	3177200000000	2316810000000	1266660000000	808910000000	853360000000	660580000000	2779090000000	861770000000	677890000000	495390000000	1409940000000	369100000000	536330000000	484630000000	338940000000	331300000000	373600000000	285710000000	93540000000	9300000000	212510000000	206030000000	1350000000	470550000000	8730000000	71490000000	73870000000	46970000000	4260000000	84200000000	108550000000	5210000000	25420000000	141570000000	131850000000	16580000000	47260000000	37280000000	7350000000	207500000000	70830000000	96870000000	570000000	199710000000	590000000	47890000000	18850000000
2016	11576870000000	5833490000000	3235660000000	2391380000000	1263870000000	808730000000	867960000000	663580000000	2229000000000	779270000000	688380000000	497390000000	1379380000000	395950000000	519090000000	461540000000	349760000000	329600000000	369630000000	289020000000	96590000000	9190000000	210090000000	180120000000	1380000000	482080000000	9460000000	71850000000	73980000000	47070000000	4350000000	80700000000	107350000000	4860000000	26530000000	150940000000	69990000000	16800000000	44070000000	38630000000	7740000000	208380000000	75730000000	101970000000	3740000000	232000000000	600000000	49770000000	18940000000
Water use (total water withdrawal, 10*9 m3)	China	United States	India	Russian Federation	Japan	Germany	Islamic Republic of Iran	Saudi Arabia	Indonesia	Canada	Mexico	South Africa	Brazil	Turkey	Australia	United Kingdom	Poland	France	Italy	Kazakhstan	Afghanistan	Albania	Algeria	Angola	Antigua and Barbuda	Argentina	Armenia	Austria	Azerbaijan	Bahrain	Barbados	Belarus	Belgium	Belize	Benin	Bolivia	Botswana	Brunei	Bulgaria	Burkina Faso	Burundi	Cameroon	Central African Republic	Chad	Chile	Colombia	Comoros	Congo	Croatia
2000	551.5	560.6	640.5	65.77	84.65	37.75	90.9	21.71	133.6	40.76	72.6	13.21	56.79	38.4	20.97	13.93	11.73	32.37	41.97	22.27	20.32	1.663	6.061	0.6666	0.0077	31.79	1.733	3.579	10.07	0.3538	0.081	1.785	6.738	0.101	0.1387	1.998	0.198	0.092	6.589	0.7566	0.2848	1.015	0.0687	0.8614	31.1	8.751	0.01	0.046	0.5735
2001	551.5	560.6	640.5	65.77	84.65	37.75	90.9	21.71	133.6	40.76	72.6	13.21	56.79	38.4	20.97	13.93	11.73	32.37	41.97	22.27	20.32	1.663	6.061	0.6666	0.0077	31.79	1.733	3.579	10.07	0.3538	0.081	1.785	6.738	0.101	0.1387	1.998	0.198	0.092	6.589	0.7566	0.2848	1.015	0.0687	0.8614	31.1	8.751	0.01	0.046	0.5735
2002	551.5	560.6	640.5	65.77	84.65	37.75	90.9	21.71	133.6	40.76	72.6	13.21	56.79	38.4	20.97	13.93	11.73	32.37	41.97	22.27	20.32	1.663	6.061	0.6666	0.0077	31.79	1.733	3.579	10.07	0.3538	0.081	1.785	6.738	0.101	0.1387	1.998	0.198	0.092	6.589	0.7566	0.2848	1.015	0.0687	0.8614	31.1	8.751	0.01	0.046	0.5735
2003	571.3	531.7	715.8	63.6	82.98	32.3	93.3	23.2	176.2	41.32	78.95	14.25	62.26	39.27	16.41	8.513	12.03	31.41	33.6	22.81	20.37	1.268	7.243	0.7058	0.0093	35.12	2.823	3.418	12.27	0.3833	0.081	1.643	6.217	0.101	0.1823	2.074	0.2018	0.092	6.202	0.818	0.2801	1.088	0.0725	0.8796	35.43	11.26	0.01	0.0917	0.651
2004	571.3	531.7	715.8	63.6	82.98	32.3	93.3	23.2	176.2	41.32	78.95	14.25	62.26	39.27	16.41	8.513	12.03	31.41	33.6	22.81	20.37	1.268	7.243	0.7058	0.0093	35.12	2.823	3.418	12.27	0.3833	0.081	1.643	6.217	0.101	0.1823	2.074	0.2018	0.092	6.202	0.818	0.2801	1.088	0.0725	0.8796	35.43	11.26	0.01	0.0917	0.651
2005	571.3	531.7	715.8	63.6	82.98	32.3	93.3	23.2	176.2	41.32	78.95	14.25	62.26	39.27	16.41	8.513	12.03	31.41	33.6	22.81	20.37	1.268	7.243	0.7058	0.0093	35.12	2.823	3.418	12.27	0.3833	0.081	1.643	6.217	0.101	0.1823	2.074	0.2018	0.092	6.202	0.818	0.2801	1.088	0.0725	0.8796	35.43	11.26	0.01	0.0917	0.651
2006	571.3	531.7	715.8	63.6	82.98	32.3	93.3	23.2	176.2	41.32	78.95	14.25	62.26	39.27	16.41	8.513	12.03	31.41	33.6	22.81	20.37	1.268	7.243	0.7058	0.0093	35.12	2.823	3.418	12.27	0.3833	0.081	1.643	6.217	0.101	0.1823	2.074	0.2018	0.092	6.202	0.818	0.2801	1.088	0.0725	0.8796	35.43	11.26	0.01	0.0917	0.651
2007	571.3	531.7	715.8	63.6	82.98	32.3	93.3	23.2	176.2	41.32	78.95	14.25	62.26	39.27	16.41	8.513	12.03	31.41	33.6	22.81	20.37	1.268	7.243	0.7058	0.0093	35.12	2.823	3.418	12.27	0.3833	0.081	1.643	6.217	0.101	0.1823	2.074	0.2018	0.092	6.202	0.818	0.2801	1.088	0.0725	0.8796	35.43	11.26	0.01	0.0917	0.651
2008	603.3	469.1	761	61.43	81.45	26.31	93.3	20.88	206.4	38.57	82.73	15.29	69.93	50.51	16.02	8.214	11.48	28.06	34.13	21.39	20.37	1.195	8.425	0.7058	0.0115	37.78	2.941	3.492	11.97	0.4157	0.081	1.525	4.994	0.101	0.2259	2.088	0.1943	0.092	5.715	0.818	0.2801	1.088	0.0725	0.8796	35.43	12.69	0.01	0.0917	0.6963
2009	603.3	469.1	761	61.43	81.45	26.31	93.3	20.88	206.4	38.57	82.73	15.29	69.93	50.51	16.02	8.214	11.48	28.06	34.13	21.39	20.37	1.195	8.425	0.7058	0.0115	37.78	2.941	3.492	11.97	0.4157	0.081	1.525	4.994	0.101	0.2259	2.088	0.1943	0.092	5.715	0.818	0.2801	1.088	0.0725	0.8796	35.43	12.69	0.01	0.0917	0.6963
2010	603.3	469.1	761	61.43	81.45	26.31	93.3	20.88	206.4	38.57	82.73	15.29	69.93	50.51	16.02	8.214	11.48	28.06	34.13	21.39	20.37	1.195	8.425	0.7058	0.0115	37.78	2.941	3.492	11.97	0.4157	0.081	1.525	4.994	0.101	0.2259	2.088	0.1943	0.092	5.715	0.818	0.2801	1.088	0.0725	0.8796	35.43	12.69	0.01	0.0917	0.6963
2011	603.3	469.1	761	61.43	81.45	26.31	93.3	20.88	206.4	38.57	82.73	15.29	69.93	50.51	16.02	8.214	11.48	28.06	34.13	21.39	20.37	1.195	8.425	0.7058	0.0115	37.78	2.941	3.492	11.97	0.4157	0.081	1.525	4.994	0.101	0.2259	2.088	0.1943	0.092	5.715	0.818	0.2801	1.088	0.0725	0.8796	35.43	12.69	0.01	0.0917	0.6963
2012	603.3	469.1	761	61.43	81.45	26.31	93.3	20.88	206.4	38.57	82.73	15.29	69.93	50.51	16.02	8.214	11.48	28.06	34.13	21.39	20.37	1.195	8.425	0.7058	0.0115	37.78	2.941	3.492	11.97	0.4157	0.081	1.525	4.994	0.101	0.2259	2.088	0.1943	0.092	5.715	0.818	0.2801	1.088	0.0725	0.8796	35.43	12.69	0.01	0.0917	0.6963
2013	598.1	444.3	761	64.41	81.45	24.44	93.3	23.35	222.6	35.6	87.84	19.38	65.68	58.96	16.55	8.42	10.08	26.41	34.19	24.45	20.37	1.42	10.46	0.7058	0.0115	37.78	2.866	3.492	12.78	0.4344	0.081	1.397	3.994	0.101	0.234	2.088	0.193	0.092	5.659	0.818	0.2801	1.088	0.0725	0.8796	35.43	13.61	0.01	0.0917	0.715
2014	598.1	444.3	761	64.41	81.45	24.44	93.3	23.35	222.6	35.6	87.84	19.38	65.68	58.96	16.55	8.42	10.08	26.41	34.19	24.45	20.37	1.42	10.46	0.7058	0.0115	37.78	2.866	3.492	12.78	0.4344	0.081	1.397	3.994	0.101	0.234	2.088	0.193	0.092	5.659	0.818	0.2801	1.088	0.0725	0.8796	35.43	13.61	0.01	0.0917	0.715
2015	598.1	444.3	761	64.41	81.45	24.44	93.3	23.35	222.6	35.6	87.84	19.38	65.68	58.96	16.55	8.42	10.08	26.41	34.19	24.45	20.37	1.42	10.46	0.7058	0.0115	37.78	2.866	3.492	12.78	0.4344	0.081	1.397	3.994	0.101	0.234	2.088	0.193	0.092	5.659	0.818	0.2801	1.088	0.0725	0.8796	35.43	13.61	0.01	0.0917	0.715
2016	598.1	444.3	761	64.41	81.45	24.44	93.3	23.35	222.6	35.6	87.84	19.38	65.68	58.96	16.55	8.42	10.08	26.41	34.19	24.45	20.37	1.42	10.46	0.7058	0.0115	37.78	2.866	3.492	12.78	0.4344	0.081	1.397	3.994	0.101	0.234	2.088	0.193	0.092	5.659	0.818	0.2801	1.088	0.0725	0.8796	35.43	13.61	0.01	0.0917	0.715
Regionalised impact(Poore, 2018)
Products	Country	Literature	Land Use (m2/year)	GHG Emission (Kg CO2 eq)	Freshwater withdrawl (L)	Source:	Poore, J. and Nemecek, T. Reducing food’s environmental impacts through producers and consumers. Science 360, 987–992 (2018). https://doi.org/10.1126/science.aaq0216
Peas	Australia	Vellinga et al. (2013)	21.9058	1.99685	3324.1
	Belgium	Meul et al. (2012)	9.54313	0.92006	0
	Canada	Gan et al. (2011)	7.72668	0.715087	0
	Canada	Gan et al. (2011)	6.86055	0.799709	0
	Canada	Gan et al. (2011)	6.7803	0.852153	0
	Canada	MacWilliam et al. (2014)	6.29566	0.618151	0
	Average (Canada)		6.9158	0.746275	0
	France	Carrouée et al. (2012)	2.11051	0.53732	187.998
	France	Carrouée et al. (2012)	2.23788	0.562078	199.698
	France	Carrouée et al. (2012)	2.03154	0.487492	0
	France	Carrouée et al. (2012)	2.84431	0.53247	0
	France	Carrouée et al. (2012)	2.50339	0.546122	0
	France	Carrouée et al. (2012)	2.27657	0.448359	111.611
	France	Carrouée et al. (2012)	2.46282	0.471207	120.994
	France	Carrouée et al. (2012)	2.86374	0.548932	0
	France	Koch and Salou (2015)	3.50731	0.583986	18.8363
	France	Koch and Salou (2015)	2.94564	0.543028	23.5002
	France	Naudin et al. (2014)	3.26915	0.662726	0
	France	Naudin et al. (2014)	1.8146	0.523066	0
	France	Nemecek et al. (2008)	2.81429	1.02861	1.83389
	France	Nguyen et al. (2012b)	3.02904	0.633745	24.1978
	France	van der Werf (2004)	2.47871	0.992117	0
	France	Vellinga et al. (2013)	3.30575	0.647841	230.657
	Average (France)		2.65595	0.609319	57.4579
	Germany	Nemecek et al. (2008)	2.8271	1.22334	1.88035
	Germany	Vellinga et al. (2013)	4.18408	0.868099	157.773
	Average (Germany)		3.50559	1.04572	79.8269
	Netherlands	Bos et al. (2014)	2.55672	1.88856	363.076
	Netherlands	Bos et al. (2014)	3.70725	2.29471	363.265
	Average (Netherlands)		3.13198	2.09164	363.171
	Portugal	Rosado et al. (2015)	14.7087	1.69681	4050.65
	Spain	Nemecek et al. (2008)	10.6846	1.60444	1.57838
	Sweden	Flysjö et al. (2008)	5.47887	1.38233	0
	Sweden	Flysjö et al. (2008)	5.72959	1.40732	0
	Sweden	Flysjö et al. (2008)	4.33127	1.13853	0
	Average (Sweden)		5.17991	1.3094	0
	Switzerland	Nemecek et al. (2005)	2.76596	1.25277	0
	Switzerland	Nemecek et al. (2005)	3.62782	1.51026	0
	Average (Switzerland)		3.19689	1.38152	0
Groundnuts	Argentina	Nemecek et al. (2015)	7.02655	6.18046	748.485
	Argentina	Vellinga et al. (2013)	8.73455	4.23447	874.543
	Average (Argentina)		7.88055	5.20746	811.514
	Australia	Maraseni et al. (2007)	6.09595	1.89417	0
	Brazil	Vellinga et al. (2013)	9.35679	5.5704	976.757
	China	Blonk et al. (2008)	5.77591	1.69902	699.301
	China	Nemecek et al. (2015)	5.64896	1.30527	831.706
	China	Vellinga et al. (2013)	7.05724	2.05465	1003.74
	China	Xu and Lan (2016)	4.21322	1.67374	53.9902
	China	Yang et al. (2014)	4.59713	3.59045	880.903
	China	Yang et al. (2014)	7.12307	3.37413	852.459
	Average (China)		5.73592	2.28288	720.35
	India	Nemecek et al. (2015)	15.3789	3.62088	6524.68
	India	Schmidt (2015)	12.8064	2.01552	1912.14
	Average (India)		14.0926	2.8182	4218.41
	Iran (Islamic Republic of)	Nikkhah et al. (2015)	5.64445	1.32269	0
	Iran (Islamic Republic of)	Nikkhah et al. (2015)	5.17848	1.28046	0
	Iran (Islamic Republic of)	Nikkhah et al. (2015)	5.09136	1.2962	0
	Average (Iran)		5.30477	1.29979	0
	United States of America	McCarty et al. (2012)	10.2745	1.95559	0
	United States of America	McCarty et al. (2012)	7.09984	1.75452	838.463
	United States of America	McCarty et al. (2012)	10.2745	1.9422	0
	United States of America	McCarty et al. (2012)	7.09984	1.74583	838.463
	United States of America	Torres et al. (2015)	4.38608	1.72079	811.561
	United States of America	Torres et al. (2015)	4.38608	1.75381	811.561
	United States of America	Torres et al. (2015)	6.16757	1.91227	0
	United States of America	Torres et al. (2015)	6.16757	1.90767	0
	United States of America	Vellinga et al. (2013)	7.052	1.94986	1151.28
	Average (U.S)		6.98978	1.84917	494.592
Soybeans (tofu)	Argentina	Castanheira and Freire (2013)	2.7129	2.97048	6.61022
	Argentina	Castanheira and Freire (2013)	3.48373	3.02366	6.61022
	Argentina	Dalgaard et al. (2008)	3.24761	3.64562	6.61022
	Argentina	Gustafson et al. (2014)	4.05084	2.94172	6.77268
	Argentina	Vellinga et al. (2013)	3.61064	3.67866	6.0814
	Average (Argentina)		3.42115	3.25203	6.53694
	Brazil	Castanheira and Freire (2013)	3.16342	5.04759	6.61022
	Brazil	Castanheira and Freire (2013); Cavalett and Ortega (2009)	3.28638	5.33556	6.61022
	Brazil	Castanheira and Freire (2013)	3.87519	6.22655	6.61022
	Brazil	Cavalett and Ortega (2010)	3.41739	7.06469	6.61022
	Brazil	de Alvarenga (2010)	1.53204	4.78239	6.61022
	Brazil	de Alvarenga (2010)	1.68693	4.63774	6.61022
	Brazil	Gustafson et al. (2014)	4.31744	5.99218	6.63247
	Brazil	Jungbluth et al. (2007)	1.9066	4.74292	6.61022
	Brazil	Maciel et al. (2015)	3.12011	1.90387	6.61022
	Brazil	Matsuura et al. (2016)	1.50728	2.86268	6.61022
	Brazil	Meul et al. (2012)	3.70118	2.53007	6.61022
	Brazil	Prudêncio da Silva et al. (2010)	1.96894	1.97638	6.61022
	Brazil	Prudêncio da Silva et al. (2010)	1.83217	2.39951	6.61022
	Brazil	Raucci et al. (2015)	2.44006	5.43506	6.61022
	Brazil	Raucci et al. (2015)	2.07875	4.86559	6.61022
	Brazil	Raucci et al. (2015)	1.56615	4.06011	6.61022
	Brazil	Vellinga et al. (2013)	3.96989	8.07427	6.0814
	Average (Brazil)		2.66882	4.58454	6.58042
	Canada	Pelletier et al. (2008)	3.75933	1.74548	6.33681
	Canada	Pelletier et al. (2008)	3.75933	1.70523	6.33681
	Average (Canada)		3.75933	1.72535	6.33681
	China	Cheng et al. (2015)	3.10566	1.76982	1024.47
	China	Gustafson et al. (2014)	4.6689	3.38257	17.5703
	China	Knudsen et al. (2010)	4.19589	1.78663	500.52
	China	Knudsen et al. (2010)	4.72038	1.76981	501.29
	China	Xu and Lan (2016)	3.13426	2.06099	31.4801
	Average (China)		3.96502	2.15397	415.066
	India	Gustafson et al. (2014)	9.04642	7.58053	8.40591
	Iran (Islamic Republic of)	Mohammadi et al. (2013)	1.94371	2.29557	1123.97
	Iran (Islamic Republic of)	Mohammadi et al. (2013)	1.80348	2.19019	948.67
	Iran (Islamic Republic of)	Mohammadi et al. (2013)	1.87353	2.15612	908.909
	Iran (Islamic Republic of)	Mohammadi et al. (2014)	1.87396	1.96364	1023.6
	Average (Iran)		1.87367	2.15138	1001.29
	Switzerland	Nemecek et al. (2005)	2.71849	2.5399	6.33681
	Switzerland	Nemecek et al. (2005)	2.88713	2.41082	6.33681
	Average (switzerland)		2.80281	2.47536	6.33681
	Thailand	Soni et al. (2013)	6.7767	1.84008	6.61022
	United States of America	Adom et al. (2012)	5.25454	2.53997	795.586
	United States of America	Adom et al. (2012)	4.01925	2.17536	795.422
	United States of America	Adom et al. (2012)	4.70427	2.30553	795.089
	United States of America	Camargo et al. (2013)	3.79184	1.8778	6.33681
	United States of America	Gustafson et al. (2014)	4.48953	2.05049	8.06961
	United States of America	Jungbluth et al. (2007)	3.84605	1.99956	6.33681
	United States of America	Pollack and Greig (2010)	3.67626	2.20874	21.3654
	United States of America	Vellinga et al. (2013)	3.86129	1.7522	6.01997
	United States of America	Williams et al. (2006)	4.94765	1.98483	6.33681
	United States of America	Williams et al. (2006)	5.01139	2.05478	6.33681
	Average (U.S)		4.36021	2.09493	244.69
Beef herd	Australia	Ridoutt et al. (2011); Ridoutt et al. (2012); Ridoutt et al. (2014)	357.462	49.1732	707.046
	Australia	Ridoutt et al. (2011); Ridoutt et al. (2012); Ridoutt et al. (2014)	224.398	51.6347	184.432
	Australia	Ridoutt et al. (2011); Ridoutt et al. (2012); Ridoutt et al. (2014)	311.714	50.8689	492.789
	Australia	Ridoutt et al. (2011); Ridoutt et al. (2012); Ridoutt et al. (2014)	281.348	61.5643	431.986
	Australia	Ridoutt et al. (2011); Ridoutt et al. (2012); Ridoutt et al. (2014)	185.304	44.3988	513.057
	Australia	Ridoutt et al. (2011); Ridoutt et al. (2012); Ridoutt et al. (2014)	185.304	45.1058	101.046
	Australia	Wiedemann et al. (2015b)	540.461	44.6181	670.664
	Australia	Wiedemann et al. (2015b)	432.031	38.0153	741.61
	Australia	Wiedemann et al. (2015b)	276.636	41.4128	548.032
	Australia	Wiedemann et al. (2016b)	1242.2	50.51	855.757
	Australia	Wiedemann et al. (2016b)	668.017	50.1533	794.958
	Australia	Wiedemann et al. (2016b)	170.747	46.3934	620.49
	Australia	Wiedemann et al. (2016b)	162.71	44.8796	375.529
	Australia	Wiedemann et al. (2016b)	1061.37	52.3534	1005.85
	Australia	Wiedemann et al. (2016b)	371.911	50.3286	621.811
	Average (Australia)		431.44	48.094	577.67
	Brazil	Alig et al. (2012)	359.099	93.7215	650.035
	Brazil	Blonk et al. (2008)	516.247	167.834	-
	Brazil	Cardoso et al. (2016)	538.656	206.464	351.075
	Brazil	Cardoso et al. (2016)	227.286	126.206	314.451
	Brazil	Cardoso et al. (2016)	123.546	86.4433	307.877
	Brazil	Cardoso et al. (2016)	86.3676	93.5888	374.102
	Brazil	Cardoso et al. (2016)	80.711	85.5144	502.153
	Brazil	Cederberg et al. (2009)	286.132	112.755	689.832
	Brazil	Dick et al. (2015)	742.893	205.32	716.475
	Brazil	Dick et al. (2015)	66.4484	55.7666	330.124
	Brazil	Mazzetto et al. (2015)	1971.94	374.221	573.22
	Brazil	Mazzetto et al. (2015)	881.826	266.383	470.086
	Brazil	Mazzetto et al. (2015)	271.51	145.312	367.321
	Brazil	Mazzetto et al. (2015)	131.33	111.678	305.913
	Brazil	Mazzetto et al. (2015)	57.6338	77.8815	-
	Brazil	Pashei Kamali et al. (2016)	641.674	187.425	-
	Brazil	Pashei Kamali et al. (2016)	113.111	86.615	-
	Brazil	Pashei Kamali et al. (2016)	599.536	432.047	-
	Brazil	Pashei Kamali et al. (2016)	508.83	171.836	-
	Brazil	Schroeder et al. (2012)	243.465	131.022	-
	Brazil	Siqueira and Duru (2016)	263.129	100.476	247.834
	Brazil	Williams et al. (2008)	317.374	142.294	-
	Average (Brazil)		410.397	157.309	442.893
	Canada	Alemu et al. (2016)	499.386	75.6706	1278.47
	Canada	Alemu et al. (2016)	210.175	86.7423	1284.02
	Canada	Alemu et al. (2016)	217.64	93.7716	1281.01
	Canada	Basarab et al. (2012)	127.081	51.0287	171.126
	Canada	Basarab et al. (2012)	119.34	48.227	162.162
	Canada	Basarab et al. (2012)	211.85	82.4087	170.742
	Canada	Basarab et al. (2012)	198.977	77.9758	160.839
	Canada	Beauchemin et al. (2011)	146.823	51.9794	-
	Canada	Legesse et al. (2016)	288.957	53.5283	-
	Canada	Vergé et al. (2008)	138.813	41.0673	-
	Canada	Vergé et al. (2008)	228.377	43.6871	-
	Average (Canada)		217.038	64.1897	644.053
	Chile	Celis et al. (2013)	361.382	104.768	26210.7
	Chile	Celis et al. (2013)	374.704	77.3148	10254.2
	Average (Chile)		368.043	91.0416	18232.4
	Denmark	Mogensen et al. (2015)	220.195	57.5018	536.191
	Denmark	Mogensen et al. (2015)	66.0658	44.0716	1279.45
	Average (Denmark)		143.13	50.7867	907.819
	France	Nguyen et al. (2012a)	64.8934	43.9733	230.25
	France	Nguyen et al. (2012a)	63.7204	43.9031	245.393
	France	Nguyen et al. (2012a)	62.5378	43.5611	176.129
	France	Nguyen et al. (2012a)	62.8022	42.0159	205.384
	France	Nguyen et al. (2013b)	70.1741	47.864	228.744
	France	Nguyen et al. (2013b)	63.285	48.1716	228.744
	France	Nguyen et al. (2013b)	71.1396	48.1441	228.744
	France	Nguyen et al. (2013b)	63.8806	47.118	276.129
	France	Nguyen et al. (2013b)	69.3227	47.9561	239.126
	France	Nguyen et al. (2013b)	63.3568	45.1537	213.696
	France	Nguyen et al. (2013b)	70.3828	48.7057	228.744
	France	Nguyen et al. (2013b)	70.2028	48.304	234.381
	France	Nguyen et al. (2013b)	69.8458	46.6337	171.107
	France	Nguyen et al. (2013b)	56.8513	51.5196	228.335
	France	Veysset et al. (2011)	86.8877	53.5926	-
	France	Veysset et al. (2011)	103.698	55.7431	-
	France	Veysset et al. (2011)	65.6348	50.3264	-
	France	Veysset et al. (2011)	95.6447	50.7702	-
	Average (France)		70.7923	47.9698	223.922
	Indonesia	Widi et al. (2015)	118.031	295.731	-
	Indonesia	Widi et al. (2015)	121.31	306.188	-
	Indonesia	Widi et al. (2015)	76.5864	225.705	-
	Indonesia	Widi et al. (2015)	83.142	248.739	-
	Indonesia	Widi et al. (2015)	150.805	365.399	-
	Indonesia	Widi et al. (2015)	126.074	315.204	-
	Indonesia	Widi et al. (2015)	99.5448	278.429	-
	Indonesia	Widi et al. (2015)	107.586	309.187	-
	Average (Indonesia)		110.385	293.073	#DIV/0!
	Ireland	Casey and Holden (2006a); Blonk et al. (2008)	49.0489	36.4582	1645.22
	Ireland	Casey and Holden (2006a); Blonk et al. (2008)	57.1213	36.7334	2085.21
	Ireland	Casey and Holden (2006a); Blonk et al. (2008)	99.0104	35.0628	214.704
	Ireland	Foley et al. (2011)	64.1448	46.0052	2084.44
	Average (Ireland)		67.3313	38.5649	1507.39
	Sweden	Cederberg and Darelius (2000)	89.3237	43.2243	-
	Sweden	Cederberg and Nilsson (2004b)	172.574	50.2157	658.881
	Sweden	Mogensen et al. (2015)	108.1	55.8068	661.902
	Average (Sweden)		123.333	49.749	660.391
	Switzerland	Alig et al. (2012)	75.0257	57.327	375.699
	Switzerland	Alig et al. (2012)	95.5426	55.9404	322.745
	Average (Switzerland)		85.2841	56.6337	349.222
	United Kingdom	Schroeder et al. (2012)	76.1512	47.569	-
	United Kingdom	Schroeder et al. (2012)	88.4509	49.1498	-
	Average (UK)		82.301	48.3594	#DIV/0!
	United States of America	Capper (2012)	82.9501	38.6516	767.824
	United States of America	Capper (2012)	101.51	44.8809	899.734
	United States of America	Capper (2012)	150	62.9049	3004.64
	United States of America	Pelletier et al. (2010)	131.292	61.6071	4898.91
	United States of America	Pelletier et al. (2010)	160.663	62.5204	2490.91
	United States of America	Pelletier et al. (2010)	202.078	71.7836	1848.57
	United States of America	Phetteplace et al. (2001)	131.561	76.6345	-
	United States of America	Roop et al. (2013)	713.139	78.6612	26951
	United States of America	Roop et al. (2013)	380.5	56.4156	460.716
	United States of America	Rotz et al. (2013)	154.359	36.265	8221.31
	United States of America	White et al. (2014)	104.65	47.951	2194.99
	United States of America	White et al. (2015)	333.39	48.9576	1228.99
	Average (U.S)		220.508	57.2695	4815.24
	Uruguay	Picasso et al. (2014)	250.126	74.3265	279.896
	Uruguay	Picasso et al. (2014)	212.714	64.9444	352.203
	Uruguay	Picasso et al. (2014)	191.702	55.8822	469.085
	Uruguay	Picasso et al. (2014)	233.561	74.5592	2371.16
	Uruguay	Picasso et al. (2014)	212.167	65.4381	2452.65
	Average (Uruguay)		220.054	67.0301	1185
Pig Meat	Australia	Wiedemann et al. (2010)	48.3345	16.5929	80.2691
	Australia	Wiedemann et al. (2010)	64.5211	12.9468	67.3643
	Average (Australia)		56.4278	14.7699	73.8167
	Austria	Winkler et al. (2016)	12.8471	10.99	1484.13
	Brazil	Cherubini et al. (2015)	7.3858	8.60109	977.226
	Brazil	Cherubini et al. (2015)	7.3858	7.73239	977.226
	Brazil	Spies (2003)	19.0181	22.7284	85.0102
	Average (Brazil)		11.2632	13.0206	679.821
	Canada	Vergé et al. (2009a)	20.5165	8.74446	-
	Canada	Vergé et al. (2009a)	35.3576	9.23397	-
	Average (Canada)		27.9371	8.98921	#DIV/0!
	Cuba	Gutiérrez et al. (2016)	32.3829	20.6765	1445.89
	Denmark	Halberg et al. (2010)	15.2232	9.54406	1569.82
	Denmark	Halberg et al. (2010)	20.0876	10.6623	1572.77
	Denmark	Halberg et al. (2010)	18.7796	9.40301	1567.08
	Denmark	Jakobsen et al. (2015)	20.6298	10.0486	-
	Denmark	Jakobsen et al. (2015)	20.4626	10.1681	-
	Denmark	Jakobsen et al. (2015)	17.1042	8.6124	-
	Denmark	Kool et al. (2009)	8.91025	6.77478	2490.3
	Denmark	Kool et al. (2009)	12.9529	6.63553	2425.03
	Denmark	Nguyen et al. (2011)	9.85243	8.03852	2151.48
	Average (denmark)		16.0003	8.87637	1962.75
	France	Basset-Mens and van der Werf (2005)	16.8613	10.2225	3366.36
	France	Basset-Mens and van der Werf (2005)	17.056	12.6278	2849.58
	France	Basset-Mens and van der Werf (2005)	24.3123	13.94	3209.2
	France	Espagnol and Demartini (2014)	265.848	15.1893	3590.19
	France	Espagnol and Demartini (2014)	286.68	13.0678	6318.16
	France	Garcia-Launay et al. (2014)	12.3001	8.59445	-
	France	Garcia-Launay et al. (2014)	12.3001	10.1336	-
	France	Garcia-Launay et al. (2014)	12.1777	8.0266	-
	France	Garcia-Launay et al. (2014)	12.1777	9.54428	-
	France	Garrigues et al. (2014)	10.3548	8.23852	-
	France	Garrigues et al. (2014)	10.3811	8.16083	-
	Average (France)		61.859	10.7042	3866.7
	Germany	Baumgartner et al. (2008)	12.8356	9.57728	1597.8
	Germany	Baumgartner et al. (2008)	13.034	9.25997	1962.89
	Germany	Baumgartner et al. (2008)	12.9206	9.2308	1932.23
	Germany	Baumgartner et al. (2008)	12.3823	8.59742	1281.95
	Germany	Hirschfeld et al. (2008)	12.0177	12.4612	176.707
	Germany	Hirschfeld et al. (2008)	10.9882	11.2567	155.448
	Germany	Hirschfeld et al. (2008)	18.7541	8.25255	198.652
	Germany	Hirschfeld et al. (2008)	17.4827	7.74438	187.014
	Germany	Kool et al. (2009)	8.46375	6.76115	2540.89
	Germany	Kool et al. (2009)	13.18	7.70911	2406.49
	Average (Germany)		13.2059	9.08505	1244.01
	Italy	Bava et al. (2017)	22.8543	12.3794	-
	Mexico	Perez (2009)	16.6384	18.1316	2064.09
	Mexico	Perez (2009)	17.9618	13.0544	2256.54
	Average (Mexico)		17.3001	15.593	2160.31
	Netherlands	Blonk et al. (2008)	12.183	9.83753	-
	Netherlands	Dolman et al. (2012)	34.3507	22.4164	4542.57
	Netherlands	Kool et al. (2009)	8.7697	6.86791	2663.93
	Netherlands	Kool et al. (2009)	15.7371	7.00326	3772.67
	Netherlands	van Zanten et al. (2015)	12.695	7.49428	1610.43
	Netherlands	van Zanten et al. (2015)	11.7519	7.46227	1351.4
	Netherlands	van Zanten et al. (2015)	11.4564	7.4692	1308.99
	Netherlands	van Zanten et al. (2015)	11.1632	7.44898	1289.93
	Average (Netherlands)		14.7634	9.49998	2362.85
	Portugal	González-García et al. (2015)	12.724	10.3237	5214.66
	Spain	Baumgartner et al. (2008)	23.8215	12.323	3166.49
	Spain	Baumgartner et al. (2008)	31.4848	12.754	2532.95
	Average (Spain)		27.6532	12.5385	2849.72
	Sweden	Carlsson et al. (2009a)	41.1024	15.7439	1029.44
	Sweden	Cederberg and Darelius (2001)	23.4714	16.802	1193.19
	Sweden	Cederberg and Nilsson (2004a)	41.262	16.3078	1230.29
	Sweden	Cederberg and Nilsson (2004a)	42.5995	16.8196	2024.74
	Sweden	Sasu-Boakye et al. (2014)	13.27	9.20711	1088.33
	Sweden	Sasu-Boakye et al. (2014)	14.0478	11.547	851.307
	Sweden	Strid Eriksson et al. (2005)	25.2546	19.2015	1261.38
	Sweden	Strid Eriksson et al. (2005)	30.4763	11.7862	1337.48
	Sweden	Strid Eriksson et al. (2005)	24.8171	10.718	1243.49
	Average (Sweden)		28.4779	14.237	1251.07
	Switzerland	Alig et al. (2012)	15.5951	11.5861	73.4536
	Switzerland	Alig et al. (2012)	15.9578	11.7377	73.4536
	Switzerland	Alig et al. (2012)	27.2008	10.9113	70.8303
	Average (Switzerland)		19.5846	11.4117	72.5792
	United Kingdom	Kool et al. (2009)	9.30929	7.05645	2323.15
	United Kingdom	Kool et al. (2009)	14.7415	7.18764	2204.2
	United Kingdom	Perez (2009)	11.9653	12.3312	1161.61
	United Kingdom	Perez (2009)	29.0433	12.9066	2354.8
	United Kingdom	Williams et al. (2006)	15.9783	12.8523	2948.84
	United Kingdom	Williams et al. (2006)	16.1942	13.3814	2946.67
	United Kingdom	Williams et al. (2006)	16.0727	13.1716	2953.13
	United Kingdom	Williams et al. (2006)	25.3912	12.939	-
	Average (U.K)		17.337	11.4783	2413.2
	United States of America	Stone et al. (2012)	12.2029	12.0326	188.544
	Viet Nam	Phong et al. (2011)	27.0855	27.6458	-
Poultry Meat	Australia	Bengtsson and Seddon (2013)	26.9379	15.6838	136.796
	Australia	Hall et al. (2014)	28.1444	5.65886	519.838
	Australia	Wiedemann et al. (2017)	38.2091	7.29115	182.6
	Australia	Wiedemann et al. (2017)	61.8303	6.73396	62.2043
	Australia	Wiedemann et al. (2017)	50.4293	5.23858	114.258
	Average (Australia)		41.1102	8.12127	203.139
	Brazil	Prudêncio da Silva et al. (2014)	6.51199	5.33369	367.092
	Brazil	Prudêncio da Silva et al. (2014)	7.15955	4.034	361.227
	Brazil	Spies (2003)	13.5042	20.3912	19.1217
	Brazil	Williams et al. (2008)	11.0063	13.7754	-
	Average (Brazil)		9.54551	10.8836	249.147
	Canada	Vergé et al. (2009b)	12.3097	5.80091	-
	Canada	Vergé et al. (2009b)	11.1254	4.72985	-
	Canada	Vergé et al. (2009b)	13.8189	5.68456	-
	Average (Canada)		12.418	5.40511	#DIV/0!
	Finland	Katajajuuri et al. (2006)	9.22507	20.989	-
	France	Arroyo et al. (2013)	53.8173	47.7019	3089.68
	France	Baumgartner et al. (2008)	14.8828	10.2942	764.487
	France	Baumgartner et al. (2008)	14.3596	9.79278	704.786
	France	Baumgartner et al. (2008)	14.6503	9.18334	824.318
	France	Baumgartner et al. (2008)	12.9643	9.107	962.632
	France	Koch and Salou (2015)	7.2441	11.693	1050.89
	France	Koch and Salou (2015)	10.7553	16.0996	1106.18
	France	Koch and Salou (2015)	22.915	9.04087	3597.99
	France	Koch and Salou (2015)	10.7145	14.1196	1376.46
	France	Koch and Salou (2015)	11.1105	17.4998	1579.16
	France	Koch and Salou (2015)	15.1599	23.3256	2154.98
	France	Prudêncio da Silva et al. (2014)	7.18786	6.1131	712.225
	France	Prudêncio da Silva et al. (2014)	10.864	7.50283	1194.02
	France	Seguin et al. (2011)	16.426	8.55063	426.722
	France	Seguin et al. (2011)	16.3831	8.13698	729.492
	Average (France)		15.9623	13.8774	1351.6
	Malaysia	Spahat (2014)	9.11735	9.18724	464.496
	Malaysia	Spahat (2014)	9.72052	9.50561	495.144
	Average (Malaysia)		9.41893	9.34642	479.82
	Netherlands	Blonk et al. (2008)	7.10287	5.81918	-
	Netherlands	Scholten et al. (2014)	7.46322	7.8776	-
	Average (Netherlands)		7.28305	6.84839	#DIV/0!
	Norway	Ellingsen and Aanondsen (2006)	19.6072	8.86062	-
	Russian Federation	Samardžić et al. (2014)	15.8078	5.62628	1675.26
	Sweden	Widheden et al. (2001)	11.235	5.5251	1372.09
	Switzerland	Alig et al. (2012)	6.39496	5.04896	332.206
	Switzerland	Alig et al. (2012)	9.01109	6.56709	420.514
	Switzerland	Alig et al. (2012)	14.534	6.76717	50.4617
	Average (Switzerland)		9.98002	6.12774	267.727
	United Kingdom	Leinonen et al. (2012a)	11.7697	9.7281	1600.1
	United Kingdom	Leinonen et al. (2012a)	15.1325	11.095	1837.03
	United Kingdom	Leinonen et al. (2012a)	52.5434	14.8577	3780.44
	United Kingdom	Leinonen et al. (2016)	19.4756	13.4541	4710.25
	United Kingdom	Leinonen et al. (2016)	16.5688	12.2158	4258.24
	United Kingdom	Leinonen et al. (2016)	18.0222	13.0077	4710.1
	United Kingdom	Leinonen et al. (2016)	15.1154	11.576	3955.44
	Average (U.K)		21.2325	12.2763	3550.23
	Viet Nam	Phong et al. (2011)	18.1279	19.5496	-
Cheese	Finland	Voutilainen et al. (2003)	27.5863	15.9624	-
	France	Bystricky et al. (2014)	22.8865	29.5567	181.841
	Germany	Bystricky et al. (2014)	21.2439	20.5797	178.688
	Italy	Bystricky et al. (2014)	20.1818	18.4768	258.123
	Netherlands	Blonk et al. (2008)	8.22661	11.9783	-
	Netherlands	Broekema and Kramer (2014)	6.89909	9.58224	2006.75
	Netherlands	van Middelaar et al. (2011)	7.92359	11.7492	-
	Average (Netherlands)		7.6831	11.1033	2006.75
	New Zealand	Basset-Mens et al. (2007); Basset-Mens et al. (2009)	9.56428	14.2987	-
	Romania	Doublet et al. (2013b)	30.9101	10.5209	-
	Sweden	Berlin (2002)	17.7327	16.5333	-
	Switzerland	Bystricky et al. (2014)	22.251	21.8012	136.309
	United States of America	Kim et al. (2013)	12.7	16.0723	1356.8
	United States of America	Kim et al. (2013)	12.54	16.4912	1325.9
	United States of America	Capper and Cady (2012)	17.4696	17.1216	1150.43
	United States of America	Capper and Cady (2012)	16.3342	15.9218	1042.25
	United States of America	Capper and Cady (2012)	16.1303	14.4625	826.588
	United States of America	Capper and Cady (2012)	14.778	13.1443	729.694
	Average (U.S)		14.992	15.5356	1071.94
Eggs	Canada	Vergé et al. (2009b)	8.79322	2.99311	139.672
	Czech Republic	Moudrý Jr et al. (2014)	5.264	8.44027	236.501
	Czech Republic	Moudrý Jr et al. (2014)	11.9029	6.54944	387.726
	Average (Czech Republic)		8.58343	7.49486	312.113
	France	Baumgartner et al. (2008)	7.35909	4.92589	-
	France	Baumgartner et al. (2008)	7.3168	4.5591	-
	France	Koch and Salou (2015)	3.72621	4.636	457.842
	France	Koch and Salou (2015)	4.49002	5.84823	550.762
	France	Koch and Salou (2015)	4.24952	5.82516	701.27
	France	Koch and Salou (2015)	8.65846	2.5621	1411.1
	Average (France)		5.96668	4.72608	780.244
	Netherlands	Blonk et al. (2008)	5.30408	3.66526	-
	Netherlands	Dekker et al. (2011)	4.69932	3.79422	-
	Netherlands	Dekker et al. (2011)	5.40202	4.4366	-
	Netherlands	Dekker et al. (2011)	5.40202	4.41572	-
	Netherlands	Dekker et al. (2011)	5.88513	4.63226	-
	Netherlands	Dekker et al. (2011)	5.87049	4.60602	-
	Netherlands	Dekker et al. (2011)	9.79391	5.36383	-
	Netherlands	Dekker et al. (2011)	9.79391	5.37296	-
	Netherlands	Mollenhorst et al. (2006)	6.39524	5.54116	-
	Netherlands	Mollenhorst et al. (2006)	6.82159	6.03324	-
	Netherlands	Mollenhorst et al. (2006)	8.01018	6.56655	-
	Netherlands	Mollenhorst et al. (2006)	7.18356	5.9987	-
	Netherlands	Scholten et al. (2014)	5.58518	4.02661	-
	Average (Netherlands)		6.62666	4.95793	#DIV/0!
	Sweden	Carlsson et al. (2009b)	11.3614	4.20066	777.928
	Sweden	Sonesson et al. (2008)	5.94066	3.27821	1035.56
	Sweden	Sonesson et al. (2008)	5.70778	2.94753	938.032
	Average (Sweden)		7.66994	3.47547	917.174
	United Kingdom	Leinonen et al. (2012b)	5.70931	3.83902	740.734
	United Kingdom	Leinonen et al. (2012b)	5.99477	4.40981	803.994
	United Kingdom	Leinonen et al. (2012b)	7.27937	4.44047	855.179
	United Kingdom	Leinonen et al. (2012b)	24.1218	5.81758	2145.41
	Average (U.K)		10.7763	4.62672	1136.33
	United States of America	Pelletier et al. (2013)	4.38338	5.90592	894.729
	United States of America	Pelletier et al. (2014)	5.49782	2.86884	643.865
	Average (USA)		4.9406	4.38738	769.297
Fish (farmed)	Brazil	Casaca (2008)	27.0142	34.7815	16248.3
	Brazil	Casaca (2008)	26.2618	32.2959	11893.6
	Brazil	Casaca (2008)	27.2716	32.0286	10826
	Average (Brazil)		26.8492	33.0353	12989.3
	Cameroon	Efole Ewoukem et al. (2012)	17.7327	87.7783	9582.98
	Cameroon	Efole Ewoukem et al. (2012)	14.7039	40.3686	11590.2
	Cameroon	Efole Ewoukem et al. (2012)	10.8416	34.9378	20031.1
	Cameroon	Efole Ewoukem et al. (2012)	7.5853	28.0099	19242.9
	Average (Cameroon)		12.7159	47.7736	15111.8
	China	Astudillo et al. (2015)	10.499	24.2227	-
	China	Henriksson et al. (2014a)	3.68659	14.2335	3446.41
	China	Henriksson et al. (2014a)	4.46094	17	3940.22
	China	Henriksson et al. (2014a)	4.07376	13.2257	3105.83
	China	Henriksson et al. (2014a)	3.68659	16.7161	4408.79
	Average (China)		5.28137	17.0796	3725.31
	Denmark	Roque d'Orbcastel et al. (2009)	6.31145	10.632	-
	France	Aubin et al. (2009)	7.26486	10.6275	135.949
	France	Boissy et al. (2011)	5.12313	8.84145	318.821
	France	Boissy et al. (2011)	7.11854	9.77845	303.073
	France	Chen et al. (2015)	3.37678	8.78276	-
	France	Chen et al. (2015)	4.10439	9.39216	-
	France	Chen et al. (2015)	4.52118	8.81561	-
	France	Roque d'Orbcastel et al. (2009)	8.45484	13.5526	-
	France	Koch and Salou (2015)	3.00681	8.25743	-
	France	Koch and Salou (2015)	2.13174	6.92053	-
	France	Koch and Salou (2015)	0.816055	13.2748	601.705
	France	Wilfart et al. (2013)	1.96921	8.14004	839.515
	France	Wilfart et al. (2013)	94.5596	38.966	45248.9
	France	Wilfart et al. (2013)	173.629	68.7188	60809.1
	Average (france)		24.3136	16.4668	15465.3
	Indonesia	Mungkung et al. (2013)	5.47112	5.51446	1580.47
	Indonesia	Mungkung et al. (2013)	6.32008	6.61107	1116.92
	Indonesia	Mungkung et al. (2013)	5.59531	20.5842	626.88
	Indonesia	Mungkung et al. (2013)	6.45083	31.5945	808.032
	Average (Indonesia)		5.95933	16.0761	1033.08
	Iran (Islamic Republic of)	Dekamin et al. (2015)	1.69731	5.20534	-
	Iran (Islamic Republic of)	Dekamin et al. (2015)	2.69952	18.4369	-
	Average (Iran)		2.19842	11.8211	#DIV/0!
	Norway	Blonk et al. (2009)	4.20005	7.50703	-
	Norway	Ellingsen et al. (2009)	10.1974	7.41158	1669.41
	Average (Norway)		7.19871	7.45931	1669.41
	Peru	Avadí et al. (2015)	26.9406	15.3432	1147.83
	Peru	Avadí et al. (2015)	19.0777	14.1362	1409.84
	Peru	Avadí et al. (2015)	19.2075	14.9406	786.07
	Peru	Avadí et al. (2015)	41.2108	31.3772	108723
	Peru	Avadí et al. (2015)	22.676	29.0541	110940
	Peru	Avadí et al. (2015)	93.4478	31.0533	21297.4
	Peru	Avadí et al. (2015)	93.5154	32.4281	6270.3
	Peru	Avadí et al. (2015)	18.4084	24.3467	5594.82
	Average (Peru)		41.8105	24.0849	32021.1
	Thailand	Henriksson et al. (2014a)	0.932429	20.0798	2924.24
	Thailand	Henriksson et al. (2014a)	1.0162	17.9719	3741.7
	Average (Thailand)		0.974316	19.0258	3332.97
	Tunisia	Jerbi et al. (2012)	13.2406	28.9181	-
	Tunisia	Jerbi et al. (2012)	15.3541	44.228	-
	Average (Tunisia)		14.2973	36.5731	#DIV/0!
	United Kingdom	Boissy et al. (2011)	4.30335	8.6871	1156.33
	United Kingdom	Boissy et al. (2011)	6.63628	8.31195	919.61
	Average (UK)		5.46982	8.49952	1037.97
	Viet Nam	Blonk et al. (2009)	9.5651	12.7511	-
	Viet Nam	Blonk et al. (2009)	9.73997	13.5214	-
	Viet Nam	Henriksson et al. (2014a)	0.273616	12.9456	3344.9
	Viet Nam	Henriksson et al. (2014a)	0.332379	13.5829	3321.64
	Viet Nam	Henriksson et al. (2014a)	0.299325	12.043	2940.07
	Viet Nam	Phong et al. (2011)	25.8039	35.1487	-
	Average (Viet Nam)		7.66904	16.6654	3202.2
Env impact from alternative proteins (Parodi et al., 2018)
Table S.8 Mean values and standard error of the environmental impact to fulfill each nutrient requirement with each future, plant, sea and animal-source foods. The category energy use is included for some future foods.
Typefood	Species	Nutrient	Impact	Mean impact	St.error		Source:	A. Parodi, A. Leip, I. J. M. De Boer, et al. The potential of future foods for sustainable and healthy diets. Nature Sustainability 1, 782–789 (2018). https://doi.org/10.1038/s41893-018-0189-7
Future foods	Black soldier fly	Ca (1000 mg)	EU (MJ)	5.60935	3.08729
Future foods	Black soldier fly	Ca (1000 mg)	GWP (kg CO2 eq)	0.803609	0.463423
Future foods	Black soldier fly	Ca (1000 mg)	LU (m2)	2.02882	1.13357
Future foods	Black soldier fly	EPA + DHA (250 mg)	EU (MJ)	221.45	160.694
Future foods	Black soldier fly	EPA + DHA (250 mg)	GWP (kg CO2 eq)	31.7255	24.3765
Future foods	Black soldier fly	EPA + DHA (250 mg)	LU (m2)	80.0952	59.2109
Future foods	Black soldier fly	Fe (14 mg)	EU (MJ)	3.24794	0.873878
Future foods	Black soldier fly	Fe (14 mg)	GWP (kg CO2 eq)	0.465307	0.133705
Future foods	Black soldier fly	Fe (14 mg)	LU (m2)	1.17473	0.322937
Future foods	Black soldier fly	Lysine (2.1 g)	EU (MJ)	4.11011	0.915092
Future foods	Black soldier fly	Lysine (2.1 g)	GWP (kg CO2 eq)	0.588824	0.141494
Future foods	Black soldier fly	Lysine (2.1 g)	LU (m2)	1.48656	0.339395
Future foods	Black soldier fly	Methionine (0.73 g)	EU (MJ)	4.34962	0.966607
Future foods	Black soldier fly	Methionine (0.73 g)	GWP (kg CO2 eq)	0.623138	0.149477
Future foods	Black soldier fly	Methionine (0.73 g)	LU (m2)	1.57319	0.358516
Future foods	Black soldier fly	Protein (50 g)	EU (MJ)	5.16207	0.796514
Future foods	Black soldier fly	Protein (50 g)	GWP (kg CO2 eq)	0.739531	0.122987
Future foods	Black soldier fly	Protein (50 g)	LU (m2)	1.86704	0.295273
Future foods	Black soldier fly	Threonine (1.05 g)	EU (MJ)	3.01588	0.670321
Future foods	Black soldier fly	Threonine (1.05 g)	GWP (kg CO2 eq)	0.432062	0.103658
Future foods	Black soldier fly	Threonine (1.05 g)	LU (m2)	1.0908	0.248623
Future foods	Black soldier fly	Tryptophan (0.28 g)	EU (MJ)	2.10841	0.546141
Future foods	Black soldier fly	Tryptophan (0.28 g)	GWP (kg CO2 eq)	0.302056	0.0844444
Future foods	Black soldier fly	Tryptophan (0.28 g)	LU (m2)	0.762579	0.202555
Future foods	Black soldier fly	Vit. A (800 ug)	EU (MJ)	47.4015	35.5883
Future foods	Black soldier fly	Vit. A (800 ug)	GWP (kg CO2 eq)	6.79086	5.50481
Future foods	Black soldier fly	Vit. A (800 ug)	LU (m2)	17.1444	13.2009
Future foods	Black soldier fly	Vit. B12 (2.4 ug)	EU (MJ)	0.764541	0.574005
Future foods	Black soldier fly	Vit. B12 (2.4 ug)	GWP (kg CO2 eq)	0.10953	0.0887873
Future foods	Black soldier fly	Vit. B12 (2.4 ug)	LU (m2)	0.276523	0.212918
Future foods	Black soldier fly	Zn (15 mg)	EU (MJ)	8.73339	2.12017
Future foods	Black soldier fly	Zn (15 mg)	GWP (kg CO2 eq)	1.25117	0.326098
Future foods	Black soldier fly	Zn (15 mg)	LU (m2)	3.15874	0.784909
Future foods	Chlorella	Ca (1000 mg)	EU (MJ)	199.928	88.2249
Future foods	Chlorella	Ca (1000 mg)	GWP (kg CO2 eq)	11.1035	3.81173
Future foods	Chlorella	Ca (1000 mg)	LU (m2)	0.671677	0.113891
Future foods	Chlorella	EPA + DHA (250 mg)	EU (MJ)	9.71104	6.42714
Future foods	Chlorella	EPA + DHA (250 mg)	GWP (kg CO2 eq)	0.539327	0.27249
Future foods	Chlorella	EPA + DHA (250 mg)	LU (m2)	0.0326251	0.00874114
Future foods	Chlorella	Fe (14 mg)	EU (MJ)	6.41361	2.83021
Future foods	Chlorella	Fe (14 mg)	GWP (kg CO2 eq)	0.356196	0.122278
Future foods	Chlorella	Fe (14 mg)	LU (m2)	0.0215471	0.00365357
Future foods	Chlorella	Lysine (2.1 g)	EU (MJ)	115.071	59.967
Future foods	Chlorella	Lysine (2.1 g)	GWP (kg CO2 eq)	6.39073	2.60996
Future foods	Chlorella	Lysine (2.1 g)	LU (m2)	0.38659	0.113522
Future foods	Chlorella	Methionine (0.73 g)	EU (MJ)	64.1268	29.0375
Future foods	Chlorella	Methionine (0.73 g)	GWP (kg CO2 eq)	3.56144	1.25621
Future foods	Chlorella	Methionine (0.73 g)	LU (m2)	0.21544	0.0411392
Future foods	Chlorella	Protein (50 g)	EU (MJ)	115.324	35.1857
Future foods	Chlorella	Protein (50 g)	GWP (kg CO2 eq)	6.40481	1.53301
Future foods	Chlorella	Protein (50 g)	LU (m2)	0.387441	0.0453105
Future foods	Chlorella	Threonine (1.05 g)	EU (MJ)	72.331	34.1813
Future foods	Chlorella	Threonine (1.05 g)	GWP (kg CO2 eq)	4.01708	1.48173
Future foods	Chlorella	Threonine (1.05 g)	LU (m2)	0.243002	0.0544106
Future foods	Chlorella	Tryptophan (0.28 g)	EU (MJ)	30.5949	20.2489
Future foods	Chlorella	Tryptophan (0.28 g)	GWP (kg CO2 eq)	1.69916	0.858487
Future foods	Chlorella	Tryptophan (0.28 g)	LU (m2)	0.102786	0.0275392
Future foods	Chlorella	Vit. A (800 ug)	EU (MJ)	NA	NA
Future foods	Chlorella	Vit. A (800 ug)	GWP (kg CO2 eq)	NA	NA
Future foods	Chlorella	Vit. A (800 ug)	LU (m2)	NA	NA
Future foods	Chlorella	Vit. B12 (2.4 ug)	EU (MJ)	10.6152	4.6942
Future foods	Chlorella	Vit. B12 (2.4 ug)	GWP (kg CO2 eq)	0.589544	0.202834
Future foods	Chlorella	Vit. B12 (2.4 ug)	LU (m2)	0.0356629	0.00611145
Future foods	Chlorella	Zn (15 mg)	EU (MJ)	1222.66	563.224
Future foods	Chlorella	Zn (15 mg)	GWP (kg CO2 eq)	67.9036	24.3863
Future foods	Chlorella	Zn (15 mg)	LU (m2)	4.10764	0.840006
Future foods	Cultured meat	Ca (1000 mg)	EU (MJ)	712.135	80.9551
Future foods	Cultured meat	Ca (1000 mg)	GWP (kg CO2 eq)	50.2925	5.72869
Future foods	Cultured meat	Ca (1000 mg)	LU (m2)	23.912	4.67016
Future foods	Cultured meat	EPA + DHA (250 mg)	EU (MJ)	2060.94	574.344
Future foods	Cultured meat	EPA + DHA (250 mg)	GWP (kg CO2 eq)	145.548	40.619
Future foods	Cultured meat	EPA + DHA (250 mg)	LU (m2)	69.202	29.7505
Future foods	Cultured meat	Fe (14 mg)	EU (MJ)	113.22	14.1377
Future foods	Cultured meat	Fe (14 mg)	GWP (kg CO2 eq)	7.99585	1.0003
Future foods	Cultured meat	Fe (14 mg)	LU (m2)	3.8017	0.795973
Future foods	Cultured meat	Lysine (2.1 g)	EU (MJ)	10.9848	2.20365
Future foods	Cultured meat	Lysine (2.1 g)	GWP (kg CO2 eq)	0.775771	0.155936
Future foods	Cultured meat	Lysine (2.1 g)	LU (m2)	0.368847	0.126802
Future foods	Cultured meat	Methionine (0.73 g)	EU (MJ)	12.6317	2.55156
Future foods	Cultured meat	Methionine (0.73 g)	GWP (kg CO2 eq)	0.892079	0.180554
Future foods	Cultured meat	Methionine (0.73 g)	LU (m2)	0.424147	0.146546
Future foods	Cultured meat	Protein (50 g)	EU (MJ)	21.8739	2.48242
Future foods	Cultured meat	Protein (50 g)	GWP (kg CO2 eq)	1.54478	0.175666
Future foods	Cultured meat	Protein (50 g)	LU (m2)	0.73448	0.143274
Future foods	Cultured meat	Threonine (1.05 g)	EU (MJ)	11.0451	2.21496
Future foods	Cultured meat	Threonine (1.05 g)	GWP (kg CO2 eq)	0.780029	0.156737
Future foods	Cultured meat	Threonine (1.05 g)	LU (m2)	0.370872	0.127465
Future foods	Cultured meat	Tryptophan (0.28 g)	EU (MJ)	11.8838	2.36188
Future foods	Cultured meat	Tryptophan (0.28 g)	GWP (kg CO2 eq)	0.839262	0.167136
Future foods	Cultured meat	Tryptophan (0.28 g)	LU (m2)	0.399035	0.136256
Future foods	Cultured meat	Vit. A (800 ug)	EU (MJ)	2317.49	603.708
Future foods	Cultured meat	Vit. A (800 ug)	GWP (kg CO2 eq)	163.666	42.7057
Future foods	Cultured meat	Vit. A (800 ug)	LU (m2)	77.8165	32.7458
Future foods	Cultured meat	Vit. B12 (2.4 ug)	EU (MJ)	26.2822	4.4401
Future foods	Cultured meat	Vit. B12 (2.4 ug)	GWP (kg CO2 eq)	1.8561	0.314088
Future foods	Cultured meat	Vit. B12 (2.4 ug)	LU (m2)	0.882501	0.240894
Future foods	Cultured meat	Zn (15 mg)	EU (MJ)	60.6285	7.94104
Future foods	Cultured meat	Zn (15 mg)	GWP (kg CO2 eq)	4.28171	0.561822
Future foods	Cultured meat	Zn (15 mg)	LU (m2)	2.03578	0.442146
Future foods	Housefly	Ca (1000 mg)	EU (MJ)	5.13077	1.53349
Future foods	Housefly	Ca (1000 mg)	GWP (kg CO2 eq)	0.335906	0.087901
Future foods	Housefly	Ca (1000 mg)	LU (m2)	0.00741747	0.00143012
Future foods	Housefly	EPA + DHA (250 mg)	EU (MJ)	82.0244	27.4957
Future foods	Housefly	EPA + DHA (250 mg)	GWP (kg CO2 eq)	5.37004	1.44435
Future foods	Housefly	EPA + DHA (250 mg)	LU (m2)	0.118581	0.0131245
Future foods	Housefly	Fe (14 mg)	EU (MJ)	0.815393	0.256521
Future foods	Housefly	Fe (14 mg)	GWP (kg CO2 eq)	0.0533828	0.0143363
Future foods	Housefly	Fe (14 mg)	LU (m2)	0.0011788	0.000210256
Future foods	Housefly	Lysine (2.1 g)	EU (MJ)	1.95627	0.60126
Future foods	Housefly	Lysine (2.1 g)	GWP (kg CO2 eq)	0.128075	0.0346397
Future foods	Housefly	Lysine (2.1 g)	LU (m2)	0.00282815	0.000573734
Future foods	Housefly	Methionine (0.73 g)	EU (MJ)	1.13032	0.390233
Future foods	Housefly	Methionine (0.73 g)	GWP (kg CO2 eq)	0.0740008	0.0222651
Future foods	Housefly	Methionine (0.73 g)	LU (m2)	0.00163409	0.000356108
Future foods	Housefly	Protein (50 g)	EU (MJ)	2.02832	0.399817
Future foods	Housefly	Protein (50 g)	GWP (kg CO2 eq)	0.132792	0.0219012
Future foods	Housefly	Protein (50 g)	LU (m2)	0.00293231	0.00028889
Future foods	Housefly	Threonine (1.05 g)	EU (MJ)	1.29279	0.323371
Future foods	Housefly	Threonine (1.05 g)	GWP (kg CO2 eq)	0.0846371	0.0177777
Future foods	Housefly	Threonine (1.05 g)	LU (m2)	0.00186896	0.000239511
Future foods	Housefly	Tryptophan (0.28 g)	EU (MJ)	2.61238	1.41228
Future foods	Housefly	Tryptophan (0.28 g)	GWP (kg CO2 eq)	0.171029	0.0851811
Future foods	Housefly	Tryptophan (0.28 g)	LU (m2)	0.00377667	0.00160979
Future foods	Housefly	Vit. A (800 ug)	EU (MJ)	16.2691	9.14592
Future foods	Housefly	Vit. A (800 ug)	GWP (kg CO2 eq)	1.06512	0.47376
Future foods	Housefly	Vit. A (800 ug)	LU (m2)	0.02352	0.00336
Future foods	Housefly	Vit. B12 (2.4 ug)	EU (MJ)	2.44037	1.37189
Future foods	Housefly	Vit. B12 (2.4 ug)	GWP (kg CO2 eq)	0.159768	0.071064
Future foods	Housefly	Vit. B12 (2.4 ug)	LU (m2)	0.003528	0.000504
Future foods	Housefly	Zn (15 mg)	EU (MJ)	1.21137	0.316919
Future foods	Housefly	Zn (15 mg)	GWP (kg CO2 eq)	0.0793071	0.0166992
Future foods	Housefly	Zn (15 mg)	LU (m2)	0.00175126	0.000158041
Future foods	Mealworm	Ca (1000 mg)	EU (MJ)	107.755	32.8448
Future foods	Mealworm	Ca (1000 mg)	GWP (kg CO2 eq)	14.349	1.27577
Future foods	Mealworm	Ca (1000 mg)	LU (m2)	85.1325	21.7852
Future foods	Mealworm	EPA + DHA (250 mg)	EU (MJ)	3.19643	2.90637
Future foods	Mealworm	EPA + DHA (250 mg)	GWP (kg CO2 eq)	0.425648	0.070758
Future foods	Mealworm	EPA + DHA (250 mg)	LU (m2)	2.52536	1.87998
Future foods	Mealworm	Fe (14 mg)	EU (MJ)	13.7079	4.49551
Future foods	Mealworm	Fe (14 mg)	GWP (kg CO2 eq)	1.82538	0.193882
Future foods	Mealworm	Fe (14 mg)	LU (m2)	10.83	3.02351
Future foods	Mealworm	Lysine (2.1 g)	EU (MJ)	4.32473	1.7463
Future foods	Mealworm	Lysine (2.1 g)	GWP (kg CO2 eq)	0.575895	0.0725816
Future foods	Mealworm	Lysine (2.1 g)	LU (m2)	3.41678	1.17076
Future foods	Mealworm	Methionine (0.73 g)	EU (MJ)	5.9694	3.35988
Future foods	Mealworm	Methionine (0.73 g)	GWP (kg CO2 eq)	0.794905	0.160521
Future foods	Mealworm	Methionine (0.73 g)	LU (m2)	4.71616	2.30896
Future foods	Mealworm	Protein (50 g)	EU (MJ)	4.59621	0.884048
Future foods	Mealworm	Protein (50 g)	GWP (kg CO2 eq)	0.612047	0.0281971
Future foods	Mealworm	Protein (50 g)	LU (m2)	3.63126	0.574027
Future foods	Mealworm	Threonine (1.05 g)	EU (MJ)	3.67236	1.45814
Future foods	Mealworm	Threonine (1.05 g)	GWP (kg CO2 eq)	0.489024	0.0592421
Future foods	Mealworm	Threonine (1.05 g)	LU (m2)	2.90137	0.974525
Future foods	Mealworm	Tryptophan (0.28 g)	EU (MJ)	2.78984	1.30268
Future foods	Mealworm	Tryptophan (0.28 g)	GWP (kg CO2 eq)	0.371504	0.051656
Future foods	Mealworm	Tryptophan (0.28 g)	LU (m2)	2.20413	0.869611
Future foods	Mealworm	Vit. A (800 ug)	EU (MJ)	141.285	104.578
Future foods	Mealworm	Vit. A (800 ug)	GWP (kg CO2 eq)	18.814	4.88666
Future foods	Mealworm	Vit. A (800 ug)	LU (m2)	111.623	72.0297
Future foods	Mealworm	Vit. B12 (2.4 ug)	EU (MJ)	10.3301	9.39266
Future foods	Mealworm	Vit. B12 (2.4 ug)	GWP (kg CO2 eq)	1.37559	0.228672
Future foods	Mealworm	Vit. B12 (2.4 ug)	LU (m2)	8.16134	6.07563
Future foods	Mealworm	Zn (15 mg)	EU (MJ)	6.71646	1.89995
Future foods	Mealworm	Zn (15 mg)	GWP (kg CO2 eq)	0.894387	0.0628173
Future foods	Mealworm	Zn (15 mg)	LU (m2)	5.30638	1.239
Future foods	Mussel	Ca (1000 mg)	GHG (kgCO2eq)	5.47353	0.408226
Future foods	Mussel	Ca (1000 mg)	LU (m2)	2.36497	1.1743
Future foods	Mussel	EPA + DHA (250 mg)	GHG (kgCO2eq)	0.0802525	0.0106377
Future foods	Mussel	EPA + DHA (250 mg)	LU (m2)	0.034675	0.0328505
Future foods	Mussel	Fe (14 mg)	GHG (kgCO2eq)	0.502254	0.0366557
Future foods	Mussel	Fe (14 mg)	LU (m2)	0.21701	0.107441
Future foods	Mussel	Lysine (2.1 g)	GHG (kgCO2eq)	0.334407	0.0443265
Future foods	Mussel	Lysine (2.1 g)	LU (m2)	0.144488	0.136886
Future foods	Mussel	Methionine (0.73 g)	GHG (kgCO2eq)	0.384551	0.0509733
Future foods	Mussel	Methionine (0.73 g)	LU (m2)	0.166154	0.157412
Future foods	Mussel	Protein (50 g)	GHG (kgCO2eq)	0.594827	0.0431913
Future foods	Mussel	Protein (50 g)	LU (m2)	0.257009	0.127159
Future foods	Mussel	Threonine (1.05 g)	GHG (kgCO2eq)	0.29032	0.0384827
Future foods	Mussel	Threonine (1.05 g)	LU (m2)	0.125439	0.118839
Future foods	Mussel	Tryptophan (0.28 g)	GHG (kgCO2eq)	0.298033	0.039505
Future foods	Mussel	Tryptophan (0.28 g)	LU (m2)	0.128772	0.121996
Future foods	Mussel	Vit. A (800 ug)	GHG (kgCO2eq)	2.35942	0.312748
Future foods	Mussel	Vit. A (800 ug)	LU (m2)	1.01944	0.965805
Future foods	Mussel	Vit. B12 (2.4 ug)	GHG (kgCO2eq)	0.0283131	0.00375298
Future foods	Mussel	Vit. B12 (2.4 ug)	LU (m2)	0.0122333	0.0115897
Future foods	Mussel	Zn (15 mg)	GHG (kgCO2eq)	1.32751	0.0965064
Future foods	Mussel	Zn (15 mg)	LU (m2)	0.573581	0.283831
Future foods	Mycoprotein	Ca (1000 mg)	GWP (kg CO2 eq)	5.52941	1.76471
Future foods	Mycoprotein	Ca (1000 mg)	LU (m2)	12.4706	NA
Future foods	Mycoprotein	EPA + DHA (250 mg)	GWP (kg CO2 eq)	NA	NA
Future foods	Mycoprotein	EPA + DHA (250 mg)	LU (m2)	NA	NA
Future foods	Mycoprotein	Fe (14 mg)	GWP (kg CO2 eq)	0.365556	0.116667
Future foods	Mycoprotein	Fe (14 mg)	LU (m2)	0.824444	NA
Future foods	Mycoprotein	Lysine (2.1 g)	GWP (kg CO2 eq)	0.566801	0.105489
Future foods	Mycoprotein	Lysine (2.1 g)	LU (m2)	1.27832	0.0552392
Future foods	Mycoprotein	Methionine (0.73 g)	GWP (kg CO2 eq)	0.776996	0.144574
Future foods	Mycoprotein	Methionine (0.73 g)	LU (m2)	1.75237	0.0748086
Future foods	Mycoprotein	Protein (50 g)	GWP (kg CO2 eq)	1.06818	0.340909
Future foods	Mycoprotein	Protein (50 g)	LU (m2)	2.40909	NA
Future foods	Mycoprotein	Threonine (1.05 g)	GWP (kg CO2 eq)	0.425333	0.0793818
Future foods	Mycoprotein	Threonine (1.05 g)	LU (m2)	0.959262	0.0469665
Future foods	Mycoprotein	Tryptophan (0.28 g)	GWP (kg CO2 eq)	0.365556	0.116667
Future foods	Mycoprotein	Tryptophan (0.28 g)	LU (m2)	0.824444	NA
Future foods	Mycoprotein	Vit. A (800 ug)	GWP (kg CO2 eq)	NA	NA
Future foods	Mycoprotein	Vit. A (800 ug)	LU (m2)	NA	NA
Future foods	Mycoprotein	Vit. B12 (2.4 ug)	GWP (kg CO2 eq)	NA	NA
Future foods	Mycoprotein	Vit. B12 (2.4 ug)	LU (m2)	NA	NA
Future foods	Mycoprotein	Zn (15 mg)	GWP (kg CO2 eq)	7.05	2.25
Future foods	Mycoprotein	Zn (15 mg)	LU (m2)	15.9	NA
Future foods	Spirulina	Ca (1000 mg)	EU (MJ)	162.836	46.7451
Future foods	Spirulina	Ca (1000 mg)	GWP (kg CO2 eq)	9.97604	2.72229
Future foods	Spirulina	Ca (1000 mg)	LU (m2)	0.420622	0.0767738
Future foods	Spirulina	EPA + DHA (250 mg)	EU (MJ)	74.0522	21.3811
Future foods	Spirulina	EPA + DHA (250 mg)	GWP (kg CO2 eq)	4.53677	1.24546
Future foods	Spirulina	EPA + DHA (250 mg)	LU (m2)	0.191285	0.0354459
Future foods	Spirulina	Fe (14 mg)	EU (MJ)	15.4206	4.44764
Future foods	Spirulina	Fe (14 mg)	GWP (kg CO2 eq)	0.944736	0.259066
Future foods	Spirulina	Fe (14 mg)	LU (m2)	0.0398331	0.00736075
Future foods	Spirulina	Lysine (2.1 g)	EU (MJ)	178.825	22.0099
Future foods	Spirulina	Lysine (2.1 g)	GWP (kg CO2 eq)	10.9556	1.29063
Future foods	Spirulina	Lysine (2.1 g)	LU (m2)	0.461925	0.0439215
Future foods	Spirulina	Methionine (0.73 g)	EU (MJ)	113.828	30.6671
Future foods	Spirulina	Methionine (0.73 g)	GWP (kg CO2 eq)	6.97364	1.79721
Future foods	Spirulina	Methionine (0.73 g)	LU (m2)	0.294031	0.0610441
Future foods	Spirulina	Protein (50 g)	EU (MJ)	92.1346	19.2269
Future foods	Spirulina	Protein (50 g)	GWP (kg CO2 eq)	5.64458	1.11599
Future foods	Spirulina	Protein (50 g)	LU (m2)	0.237993	0.0268226
Future foods	Spirulina	Threonine (1.05 g)	EU (MJ)	104.638	11.5479
Future foods	Spirulina	Threonine (1.05 g)	GWP (kg CO2 eq)	6.41058	0.675181
Future foods	Spirulina	Threonine (1.05 g)	LU (m2)	0.270291	0.0212362
Future foods	Spirulina	Tryptophan (0.28 g)	EU (MJ)	45.8851	14.2267
Future foods	Spirulina	Tryptophan (0.28 g)	GWP (kg CO2 eq)	2.81113	0.830971
Future foods	Spirulina	Tryptophan (0.28 g)	LU (m2)	0.118526	0.0259654
Future foods	Spirulina	Vit. A (800 ug)	EU (MJ)	2.52374	1.11377
Future foods	Spirulina	Vit. A (800 ug)	GWP (kg CO2 eq)	0.154615	0.064662
Future foods	Spirulina	Vit. A (800 ug)	LU (m2)	0.00651908	0.00167175
Future foods	Spirulina	Vit. B12 (2.4 ug)	EU (MJ)	1.68638	0.741629
Future foods	Spirulina	Vit. B12 (2.4 ug)	GWP (kg CO2 eq)	0.103315	0.0430493
Future foods	Spirulina	Vit. B12 (2.4 ug)	LU (m2)	0.0043561	0.00110334
Future foods	Spirulina	Zn (15 mg)	EU (MJ)	742.978	218.889
Future foods	Spirulina	Zn (15 mg)	GWP (kg CO2 eq)	45.5182	12.7608
Future foods	Spirulina	Zn (15 mg)	LU (m2)	1.91919	0.37415
Future foods	Sugar kelp	Ca (1000 mg)	EU (MJ)	6.51329	0.517769
Future foods	Sugar kelp	Ca (1000 mg)	GWP (kg CO2 eq)	0.116413	0.0222956
Future foods	Sugar kelp	Ca (1000 mg)	LU(m2)	0	0
Future foods	Sugar kelp	EPA + DHA (250 mg)	EU (MJ)	23.9267	2.99549
Future foods	Sugar kelp	EPA + DHA (250 mg)	GWP (kg CO2 eq)	0.427644	0.0541766
Future foods	Sugar kelp	EPA + DHA (250 mg)	LU(m2)	0	0
Future foods	Sugar kelp	Fe (14 mg)	EU (MJ)	20.9267	1.85438
Future foods	Sugar kelp	Fe (14 mg)	GWP (kg CO2 eq)	0.374024	0.104217
Future foods	Sugar kelp	Fe (14 mg)	LU(m2)	0	NA
Future foods	Sugar kelp	Lysine (2.1 g)	EU (MJ)	69.5366	9.482
Future foods	Sugar kelp	Lysine (2.1 g)	GWP (kg CO2 eq)	1.24283	0.139426
Future foods	Sugar kelp	Lysine (2.1 g)	LU(m2)	0	0
Future foods	Sugar kelp	Methionine (0.73 g)	EU (MJ)	42.6521	5.53614
Future foods	Sugar kelp	Methionine (0.73 g)	GWP (kg CO2 eq)	0.762324	0.0838396
Future foods	Sugar kelp	Methionine (0.73 g)	LU(m2)	0	0
Future foods	Sugar kelp	Protein (50 g)	EU (MJ)	52.2528	9.05785
Future foods	Sugar kelp	Protein (50 g)	GWP (kg CO2 eq)	0.933919	0.12138
Future foods	Sugar kelp	Protein (50 g)	LU(m2)	0	0
Future foods	Sugar kelp	Threonine (1.05 g)	EU (MJ)	58.0226	9.07326
Future foods	Sugar kelp	Threonine (1.05 g)	GWP (kg CO2 eq)	1.03704	0.127918
Future foods	Sugar kelp	Threonine (1.05 g)	LU(m2)	0	0
Future foods	Sugar kelp	Tryptophan (0.28 g)	EU (MJ)	NA	NA
Future foods	Sugar kelp	Tryptophan (0.28 g)	GWP (kg CO2 eq)	NA	NA
Future foods	Sugar kelp	Tryptophan (0.28 g)	LU(m2)	NA	NA
Future foods	Sugar kelp	Vit. A (800 ug)	EU (MJ)	60.2888	32.7792
Future foods	Sugar kelp	Vit. A (800 ug)	GWP (kg CO2 eq)	1.07755	0.410817
Future foods	Sugar kelp	Vit. A (800 ug)	LU(m2)	0	0
Future foods	Sugar kelp	Vit. B12 (2.4 ug)	EU (MJ)	0.155455	0.0137754
Future foods	Sugar kelp	Vit. B12 (2.4 ug)	GWP (kg CO2 eq)	0.00277846	0.000774181
Future foods	Sugar kelp	Vit. B12 (2.4 ug)	LU(m2)	0	NA
Future foods	Sugar kelp	Zn (15 mg)	EU (MJ)	32.3865	2.86987
Future foods	Sugar kelp	Zn (15 mg)	GWP (kg CO2 eq)	0.578847	0.161288
Future foods	Sugar kelp	Zn (15 mg)	LU(m2)	0	NA
Plant source foods	Bean	Ca (1000 mg)	GWP (kg CO2 eq)	0.559703	0.111872
Plant source foods	Bean	Ca (1000 mg)	LU(m2)	4.01172	0.655516
Plant source foods	Bean	EPA + DHA (250 mg)	GWP (kg CO2 eq)	NA	NA
Plant source foods	Bean	EPA + DHA (250 mg)	LU(m2)	NA	NA
Plant source foods	Bean	Fe (14 mg)	GWP (kg CO2 eq)	0.137132	0.0156731
Plant source foods	Bean	Fe (14 mg)	LU(m2)	0.982904	0.0919165
Plant source foods	Bean	Lysine (2.1 g)	GWP (kg CO2 eq)	0.103881	0.0207635
Plant source foods	Bean	Lysine (2.1 g)	LU(m2)	0.744574	0.121663
Plant source foods	Bean	Methionine (0.73 g)	GWP (kg CO2 eq)	0.164133	0.0328067
Plant source foods	Bean	Methionine (0.73 g)	LU(m2)	1.17644	0.19223
Plant source foods	Bean	Protein (50 g)	GWP (kg CO2 eq)	0.169715	0.0339223
Plant source foods	Bean	Protein (50 g)	LU(m2)	1.21645	0.198768
Plant source foods	Bean	Threonine (1.05 g)	GWP (kg CO2 eq)	0.0847172	0.0169331
Plant source foods	Bean	Threonine (1.05 g)	LU(m2)	0.607218	0.0992195
Plant source foods	Bean	Tryptophan (0.28 g)	GWP (kg CO2 eq)	0.0803245	0.0160551
Plant source foods	Bean	Tryptophan (0.28 g)	LU(m2)	0.575733	0.0940748
Plant source foods	Bean	Vit. A (800 ug)	GWP (kg CO2 eq)	NA	NA
Plant source foods	Bean	Vit. A (800 ug)	LU(m2)	NA	NA
Plant source foods	Bean	Vit. B12 (2.4 ug)	GWP (kg CO2 eq)	NA	NA
Plant source foods	Bean	Vit. B12 (2.4 ug)	LU(m2)	NA	NA
Plant source foods	Bean	Zn (15 mg)	GWP (kg CO2 eq)	0.431976	0.0493884
Plant source foods	Bean	Zn (15 mg)	LU(m2)	3.09622	0.289667
Plant source foods	Maize	Ca (1000 mg)	GWP (kg CO2 eq)	30.2321	2.59359
Plant source foods	Maize	Ca (1000 mg)	LU(m2)	98.0929	8.48361
Plant source foods	Maize	EPA + DHA (250 mg)	GWP (kg CO2 eq)	NA	NA
Plant source foods	Maize	EPA + DHA (250 mg)	LU(m2)	NA	NA
Plant source foods	Maize	Fe (14 mg)	GWP (kg CO2 eq)	1.33188	0.0668921
Plant source foods	Maize	Fe (14 mg)	LU(m2)	4.32149	0.221249
Plant source foods	Maize	Lysine (2.1 g)	GWP (kg CO2 eq)	0.75739	0.0668849
Plant source foods	Maize	Lysine (2.1 g)	LU(m2)	2.45747	0.221265
Plant source foods	Maize	Methionine (0.73 g)	GWP (kg CO2 eq)	0.53688	0.0474117
Plant source foods	Maize	Methionine (0.73 g)	LU(m2)	1.74199	0.156845
Plant source foods	Maize	Protein (50 g)	GWP (kg CO2 eq)	0.76335	0.0385855
Plant source foods	Maize	Protein (50 g)	LU(m2)	2.47681	0.127596
Plant source foods	Maize	Threonine (1.05 g)	GWP (kg CO2 eq)	0.40218	0.0355164
Plant source foods	Maize	Threonine (1.05 g)	LU(m2)	1.30494	0.117493
Plant source foods	Maize	Tryptophan (0.28 g)	GWP (kg CO2 eq)	0.601521	0.0531202
Plant source foods	Maize	Tryptophan (0.28 g)	LU(m2)	1.95173	0.175729
Plant source foods	Maize	Vit. A (800 ug)	GWP (kg CO2 eq)	8.78412	0.775723
Plant source foods	Maize	Vit. A (800 ug)	LU(m2)	28.5015	2.5662
Plant source foods	Maize	Vit. B12 (2.4 ug)	GWP (kg CO2 eq)	NA	NA
Plant source foods	Maize	Vit. B12 (2.4 ug)	LU(m2)	NA	NA
Plant source foods	Maize	Zn (15 mg)	GWP (kg CO2 eq)	1.6376	0.083747
Plant source foods	Maize	Zn (15 mg)	LU(m2)	5.31344	0.276832
Plant source foods	Rice	Ca (1000 mg)	GWP (kg CO2 eq)	3.44093	0.31797
Plant source foods	Rice	Ca (1000 mg)	LU(m2)	14.8502	1.14247
Plant source foods	Rice	EPA + DHA (250 mg)	GWP (kg CO2 eq)	NA	NA
Plant source foods	Rice	EPA + DHA (250 mg)	LU(m2)	NA	NA
Plant source foods	Rice	Fe (14 mg)	GWP (kg CO2 eq)	0.774341	0.114824
Plant source foods	Rice	Fe (14 mg)	LU(m2)	3.34186	0.390925
Plant source foods	Rice	Lysine (2.1 g)	GWP (kg CO2 eq)	0.380824	0.0564709
Plant source foods	Rice	Lysine (2.1 g)	LU(m2)	1.64354	0.192258
Plant source foods	Rice	Methionine (0.73 g)	GWP (kg CO2 eq)	0.203021	0.0301051
Plant source foods	Rice	Methionine (0.73 g)	LU(m2)	0.876185	0.102495
Plant source foods	Rice	Protein (50 g)	GWP (kg CO2 eq)	0.328041	0.0268711
Plant source foods	Rice	Protein (50 g)	LU(m2)	1.41574	0.0915476
Plant source foods	Rice	Threonine (1.05 g)	GWP (kg CO2 eq)	0.192516	0.0285474
Plant source foods	Rice	Threonine (1.05 g)	LU(m2)	0.830849	0.0971913
Plant source foods	Rice	Tryptophan (0.28 g)	GWP (kg CO2 eq)	0.158163	0.0234534
Plant source foods	Rice	Tryptophan (0.28 g)	LU(m2)	0.682593	0.0798485
Plant source foods	Rice	Vit. A (800 ug)	GWP (kg CO2 eq)	NA	NA
Plant source foods	Rice	Vit. A (800 ug)	LU(m2)	NA	NA
Plant source foods	Rice	Vit. B12 (2.4 ug)	GWP (kg CO2 eq)	NA	NA
Plant source foods	Rice	Vit. B12 (2.4 ug)	LU(m2)	NA	NA
Plant source foods	Rice	Zn (15 mg)	GWP (kg CO2 eq)	0.595852	0.0491956
Plant source foods	Rice	Zn (15 mg)	LU(m2)	2.57155	0.168292
Plant source foods	Soybean	Ca (1000 mg)	GWP (kg CO2 eq)	0.203182	0.0247556
Plant source foods	Soybean	Ca (1000 mg)	LU(m2)	1.55074	0.0713465
Plant source foods	Soybean	EPA + DHA (250 mg)	GWP (kg CO2 eq)	NA	NA
Plant source foods	Soybean	EPA + DHA (250 mg)	LU(m2)	NA	NA
Plant source foods	Soybean	Fe (14 mg)	GWP (kg CO2 eq)	0.0502499	0.00613249
Plant source foods	Soybean	Fe (14 mg)	LU(m2)	0.383521	0.0177822
Plant source foods	Soybean	Lysine (2.1 g)	GWP (kg CO2 eq)	0.0436669	0.00944543
Plant source foods	Soybean	Lysine (2.1 g)	LU(m2)	0.333278	0.0271896
Plant source foods	Soybean	Methionine (0.73 g)	GWP (kg CO2 eq)	0.0748868	0.0161985
Plant source foods	Soybean	Methionine (0.73 g)	LU(m2)	0.571556	0.0466289
Plant source foods	Soybean	Protein (50 g)	GWP (kg CO2 eq)	0.0771021	0.00939133
Plant source foods	Soybean	Protein (50 g)	LU(m2)	0.588464	0.0270367
Plant source foods	Soybean	Threonine (1.05 g)	GWP (kg CO2 eq)	0.0334549	0.0072365
Plant source foods	Soybean	Threonine (1.05 g)	LU(m2)	0.255337	0.020831
Plant source foods	Soybean	Tryptophan (0.28 g)	GWP (kg CO2 eq)	0.0266583	0.00576635
Plant source foods	Soybean	Tryptophan (0.28 g)	LU(m2)	0.203463	0.016599
Plant source foods	Soybean	Vit. A (800 ug)	GWP (kg CO2 eq)	45.0144	9.73689
Plant source foods	Soybean	Vit. A (800 ug)	LU(m2)	343.562	28.0286
Plant source foods	Soybean	Vit. B12 (2.4 ug)	GWP (kg CO2 eq)	NA	NA
Plant source foods	Soybean	Vit. B12 (2.4 ug)	LU(m2)	NA	NA
Plant source foods	Soybean	Zn (15 mg)	GWP (kg CO2 eq)	0.172627	0.0210301
Plant source foods	Soybean	Zn (15 mg)	LU(m2)	1.31753	0.0605819
Plant source foods	Wheat	Ca (1000 mg)	GWP (kg CO2 eq)	2.20791	0.278235
Plant source foods	Wheat	Ca (1000 mg)	LU(m2)	7.35626	0.631531
Plant source foods	Wheat	EPA + DHA (250 mg)	GWP (kg CO2 eq)	NA	NA
Plant source foods	Wheat	EPA + DHA (250 mg)	LU(m2)	NA	NA
Plant source foods	Wheat	Fe (14 mg)	GWP (kg CO2 eq)	0.237064	0.0299488
Plant source foods	Wheat	Fe (14 mg)	LU(m2)	0.789844	0.0680688
Plant source foods	Wheat	Lysine (2.1 g)	GWP (kg CO2 eq)	0.519819	0.114997
Plant source foods	Wheat	Lysine (2.1 g)	LU(m2)	1.73192	0.260898
Plant source foods	Wheat	Methionine (0.73 g)	GWP (kg CO2 eq)	0.247067	0.0546572
Plant source foods	Wheat	Methionine (0.73 g)	LU(m2)	0.823171	0.124003
Plant source foods	Wheat	Protein (50 g)	GWP (kg CO2 eq)	0.307827	0.0387663
Plant source foods	Wheat	Protein (50 g)	LU(m2)	1.02561	0.0879597
Plant source foods	Wheat	Threonine (1.05 g)	GWP (kg CO2 eq)	0.215171	0.047601
Plant source foods	Wheat	Threonine (1.05 g)	LU(m2)	0.716901	0.107994
Plant source foods	Wheat	Tryptophan (0.28 g)	GWP (kg CO2 eq)	0.119322	0.0263969
Plant source foods	Wheat	Tryptophan (0.28 g)	LU(m2)	0.397554	0.0598878
Plant source foods	Wheat	Vit. A (800 ug)	GWP (kg CO2 eq)	NA	NA
Plant source foods	Wheat	Vit. A (800 ug)	LU(m2)	NA	NA
Plant source foods	Wheat	Vit. B12 (2.4 ug)	GWP (kg CO2 eq)	NA	NA
Plant source foods	Wheat	Vit. B12 (2.4 ug)	LU(m2)	NA	NA
Plant source foods	Wheat	Zn (15 mg)	GWP (kg CO2 eq)	0.295731	0.037289
Plant source foods	Wheat	Zn (15 mg)	LU(m2)	0.985307	0.0846645
Animal source foods	Beef	Ca (1000 mg)	GWP (kg CO2 eq)	423.368	16.5409
Animal source foods	Beef	Ca (1000 mg)	LU(m2)	715.894	41.2005
Animal source foods	Beef	EPA + DHA (250 mg)	GWP (kg CO2 eq)	681.717	28.0487
Animal source foods	Beef	EPA + DHA (250 mg)	LU(m2)	1152.75	68.1878
Animal source foods	Beef	Fe (14 mg)	GWP (kg CO2 eq)	32.7686	1.07756
Animal source foods	Beef	Fe (14 mg)	LU(m2)	55.4099	2.93844
Animal source foods	Beef	Lysine (2.1 g)	GWP (kg CO2 eq)	5.7004	0.327588
Animal source foods	Beef	Lysine (2.1 g)	LU(m2)	9.63908	0.895465
Animal source foods	Beef	Methionine (0.73 g)	GWP (kg CO2 eq)	6.53697	0.375663
Animal source foods	Beef	Methionine (0.73 g)	LU(m2)	11.0537	1.02688
Animal source foods	Beef	Protein (50 g)	GWP (kg CO2 eq)	12.0087	0.393587
Animal source foods	Beef	Protein (50 g)	LU(m2)	20.3061	1.07531
Animal source foods	Beef	Threonine (1.05 g)	GWP (kg CO2 eq)	5.79742	0.333163
Animal source foods	Beef	Threonine (1.05 g)	LU(m2)	9.80313	0.910705
Animal source foods	Beef	Tryptophan (0.28 g)	GWP (kg CO2 eq)	7.05517	0.405443
Animal source foods	Beef	Tryptophan (0.28 g)	LU(m2)	11.9299	1.10828
Animal source foods	Beef	Vit. A (800 ug)	GWP (kg CO2 eq)	1914.94	110.047
Animal source foods	Beef	Vit. A (800 ug)	LU(m2)	3238.06	300.814
Animal source foods	Beef	Vit. B12 (2.4 ug)	GWP (kg CO2 eq)	4.18364	0.13803
Animal source foods	Beef	Vit. B12 (2.4 ug)	LU(m2)	7.07431	0.375694
Animal source foods	Beef	Zn (15 mg)	GWP (kg CO2 eq)	14.6059	0.478822
Animal source foods	Beef	Zn (15 mg)	LU(m2)	24.6977	1.30801
Animal source foods	Chicken	Ca (1000 mg)	GWP (kg CO2 eq)	88.3039	4.75342
Animal source foods	Chicken	Ca (1000 mg)	LU(m2)	147.547	9.21304
Animal source foods	Chicken	EPA + DHA (250 mg)	GWP (kg CO2 eq)	9.7784	0.921985
Animal source foods	Chicken	EPA + DHA (250 mg)	LU(m2)	16.3388	1.78771
Animal source foods	Chicken	Fe (14 mg)	GWP (kg CO2 eq)	18.064	0.97161
Animal source foods	Chicken	Fe (14 mg)	LU(m2)	30.1831	1.88348
Animal source foods	Chicken	Lysine (2.1 g)	GWP (kg CO2 eq)	1.33445	0.125822
Animal source foods	Chicken	Lysine (2.1 g)	LU(m2)	2.22973	0.243967
Animal source foods	Chicken	Methionine (0.73 g)	GWP (kg CO2 eq)	1.47914	0.139465
Animal source foods	Chicken	Methionine (0.73 g)	LU(m2)	2.4715	0.27042
Animal source foods	Chicken	Protein (50 g)	GWP (kg CO2 eq)	2.70329	0.14525
Animal source foods	Chicken	Protein (50 g)	LU(m2)	4.51694	0.281632
Animal source foods	Chicken	Threonine (1.05 g)	GWP (kg CO2 eq)	1.32861	0.125272
Animal source foods	Chicken	Threonine (1.05 g)	LU(m2)	2.21997	0.2429
Animal source foods	Chicken	Tryptophan (0.28 g)	GWP (kg CO2 eq)	1.36196	0.128417
Animal source foods	Chicken	Tryptophan (0.28 g)	LU(m2)	2.27571	0.248998
Animal source foods	Chicken	Vit. A (800 ug)	GWP (kg CO2 eq)	21.5893	2.03561
Animal source foods	Chicken	Vit. A (800 ug)	LU(m2)	36.0736	3.94702
Animal source foods	Chicken	Vit. B12 (2.4 ug)	GWP (kg CO2 eq)	5.93639	0.319016
Animal source foods	Chicken	Vit. B12 (2.4 ug)	LU(m2)	9.91912	0.618534
Animal source foods	Chicken	Zn (15 mg)	GWP (kg CO2 eq)	12.2632	0.659008
Animal source foods	Chicken	Zn (15 mg)	LU(m2)	20.4907	1.27774
Animal source foods	Egg	Ca (1000 mg)	GWP (kg CO2 eq)	6.37151	0.409466
Animal source foods	Egg	Ca (1000 mg)	LU(m2)	13.2497	0.810679
Animal source foods	Egg	EPA + DHA (250 mg)	GWP (kg CO2 eq)	1.53901	0.0990463
Animal source foods	Egg	EPA + DHA (250 mg)	LU(m2)	3.2004	0.196118
Animal source foods	Egg	Fe (14 mg)	GWP (kg CO2 eq)	2.85535	0.18362
Animal source foods	Egg	Fe (14 mg)	LU(m2)	5.93773	0.363558
Animal source foods	Egg	Lysine (2.1 g)	GWP (kg CO2 eq)	0.821505	0.0926335
Animal source foods	Egg	Lysine (2.1 g)	LU(m2)	1.70833	0.183397
Animal source foods	Egg	Methionine (0.73 g)	GWP (kg CO2 eq)	0.683492	0.0770711
Animal source foods	Egg	Methionine (0.73 g)	LU(m2)	1.42133	0.152586
Animal source foods	Egg	Protein (50 g)	GWP (kg CO2 eq)	1.42032	0.0912656
Animal source foods	Egg	Protein (50 g)	LU(m2)	2.95357	0.18069
Animal source foods	Egg	Threonine (1.05 g)	GWP (kg CO2 eq)	0.673752	0.0759728
Animal source foods	Egg	Threonine (1.05 g)	LU(m2)	1.40108	0.150412
Animal source foods	Egg	Tryptophan (0.28 g)	GWP (kg CO2 eq)	0.598174	0.0674505
Animal source foods	Egg	Tryptophan (0.28 g)	LU(m2)	1.24391	0.133539
Animal source foods	Egg	Vit. A (800 ug)	GWP (kg CO2 eq)	1.78384	0.201147
Animal source foods	Egg	Vit. A (800 ug)	LU(m2)	3.70952	0.398233
Animal source foods	Egg	Vit. B12 (2.4 ug)	GWP (kg CO2 eq)	0.968998	0.0631819
Animal source foods	Egg	Vit. B12 (2.4 ug)	LU(m2)	2.01505	0.12523
Animal source foods	Egg	Zn (15 mg)	GWP (kg CO2 eq)	4.14894	0.266639
Animal source foods	Egg	Zn (15 mg)	LU(m2)	8.62779	0.527905
Animal source foods	Milk	Ca (1000 mg)	GWP (kg CO2 eq)	1.62164	0.056637
Animal source foods	Milk	Ca (1000 mg)	LU(m2)	2.58994	0.153025
Animal source foods	Milk	EPA + DHA (250 mg)	GWP (kg CO2 eq)	NA	NA
Animal source foods	Milk	EPA + DHA (250 mg)	LU(m2)	NA	NA
Animal source foods	Milk	Fe (14 mg)	GWP (kg CO2 eq)	85.7553	3.04374
Animal source foods	Milk	Fe (14 mg)	LU(m2)	136.961	8.1458
Animal source foods	Milk	Lysine (2.1 g)	GWP (kg CO2 eq)	1.4574	0.0892461
Animal source foods	Milk	Lysine (2.1 g)	LU(m2)	2.32763	0.241266
Animal source foods	Milk	Methionine (0.73 g)	GWP (kg CO2 eq)	1.607	0.0984073
Animal source foods	Milk	Methionine (0.73 g)	LU(m2)	2.56656	0.266032
Animal source foods	Milk	Protein (50 g)	GWP (kg CO2 eq)	2.90836	0.101514
Animal source foods	Milk	Protein (50 g)	LU(m2)	4.64496	0.274377
Animal source foods	Milk	Threonine (1.05 g)	GWP (kg CO2 eq)	1.43565	0.0879141
Animal source foods	Milk	Threonine (1.05 g)	LU(m2)	2.29289	0.237665
Animal source foods	Milk	Tryptophan (0.28 g)	GWP (kg CO2 eq)	1.28251	0.0785366
Animal source foods	Milk	Tryptophan (0.28 g)	LU(m2)	2.04831	0.212314
Animal source foods	Milk	Vit. A (800 ug)	GWP (kg CO2 eq)	3.18637	0.195122
Animal source foods	Milk	Vit. A (800 ug)	LU(m2)	5.08898	0.527488
Animal source foods	Milk	Vit. B12 (2.4 ug)	GWP (kg CO2 eq)	0.978575	0.0344337
Animal source foods	Milk	Vit. B12 (2.4 ug)	LU(m2)	1.56289	0.0926237
Animal source foods	Milk	Zn (15 mg)	GWP (kg CO2 eq)	7.42946	0.259595
Animal source foods	Milk	Zn (15 mg)	LU(m2)	11.8657	0.701202
Animal source foods	Pork	Ca (1000 mg)	GWP (kg CO2 eq)	127.289	5.95523
Animal source foods	Pork	Ca (1000 mg)	LU(m2)	142.944	5.81747
Animal source foods	Pork	EPA + DHA (250 mg)	GWP (kg CO2 eq)	1126.03	92.4483
Animal source foods	Pork	EPA + DHA (250 mg)	LU(m2)	1264.52	90.3076
Animal source foods	Pork	Fe (14 mg)	GWP (kg CO2 eq)	24.8171	1.161
Animal source foods	Pork	Fe (14 mg)	LU(m2)	27.8694	1.13412
Animal source foods	Pork	Lysine (2.1 g)	GWP (kg CO2 eq)	2.22683	0.182826
Animal source foods	Pork	Lysine (2.1 g)	LU(m2)	2.50071	0.178592
Animal source foods	Pork	Methionine (0.73 g)	GWP (kg CO2 eq)	2.63394	0.21625
Animal source foods	Pork	Methionine (0.73 g)	LU(m2)	2.95789	0.211243
Animal source foods	Pork	Protein (50 g)	GWP (kg CO2 eq)	4.1959	0.196299
Animal source foods	Pork	Protein (50 g)	LU(m2)	4.71196	0.191756
Animal source foods	Pork	Threonine (1.05 g)	GWP (kg CO2 eq)	2.23713	0.183671
Animal source foods	Pork	Threonine (1.05 g)	LU(m2)	2.51227	0.179418
Animal source foods	Pork	Tryptophan (0.28 g)	GWP (kg CO2 eq)	2.26444	0.185914
Animal source foods	Pork	Tryptophan (0.28 g)	LU(m2)	2.54295	0.181609
Animal source foods	Pork	Vit. A (800 ug)	GWP (kg CO2 eq)	593.443	48.7224
Animal source foods	Pork	Vit. A (800 ug)	LU(m2)	666.431	47.5943
Animal source foods	Pork	Vit. B12 (2.4 ug)	GWP (kg CO2 eq)	4.98673	0.409417
Animal source foods	Pork	Vit. B12 (2.4 ug)	LU(m2)	5.60005	0.399937
Animal source foods	Pork	Zn (15 mg)	GWP (kg CO2 eq)	10.9094	0.510369
Animal source foods	Pork	Zn (15 mg)	LU(m2)	12.2511	0.498554
Seafood	Tilapia	Ca (1000 mg)	EU (MJ)	602.677	53.0694
Seafood	Tilapia	Ca (1000 mg)	GWP (kg CO2 eq)	128.553	18.6416
Seafood	Tilapia	Ca (1000 mg)	LU (m2)	196.649	17.4221
Seafood	Tilapia	EPA + DHA (250 mg)	EU (MJ)	17.8636	2.77047
Seafood	Tilapia	EPA + DHA (250 mg)	GWP (kg CO2 eq)	3.81037	0.640796
Seafood	Tilapia	EPA + DHA (250 mg)	LU (m2)	5.82875	0.787886
Seafood	Tilapia	Fe (14 mg)	EU (MJ)	150.731	13.3454
Seafood	Tilapia	Fe (14 mg)	GWP (kg CO2 eq)	32.1514	4.6665
Seafood	Tilapia	Fe (14 mg)	LU (m2)	49.1823	4.37239
Seafood	Tilapia	Lysine (2.1 g)	EU (MJ)	6.977	1.33269
Seafood	Tilapia	Lysine (2.1 g)	GWP (kg CO2 eq)	1.48822	0.401783
Seafood	Tilapia	Lysine (2.1 g)	LU (m2)	2.27654	0.395803
Seafood	Tilapia	Methionine (0.73 g)	EU (MJ)	7.38253	1.41015
Seafood	Tilapia	Methionine (0.73 g)	GWP (kg CO2 eq)	1.57472	0.425136
Seafood	Tilapia	Methionine (0.73 g)	LU (m2)	2.40886	0.418808
Seafood	Tilapia	Protein (50 g)	EU (MJ)	14.9743	1.27969
Seafood	Tilapia	Protein (50 g)	GWP (kg CO2 eq)	3.19408	0.460962
Seafood	Tilapia	Protein (50 g)	LU (m2)	4.88601	0.424854
Seafood	Tilapia	Threonine (1.05 g)	EU (MJ)	6.64651	1.26956
Seafood	Tilapia	Threonine (1.05 g)	GWP (kg CO2 eq)	1.41772	0.382752
Seafood	Tilapia	Threonine (1.05 g)	LU (m2)	2.16871	0.377054
Seafood	Tilapia	Tryptophan (0.28 g)	EU (MJ)	8.01802	1.53153
Seafood	Tilapia	Tryptophan (0.28 g)	GWP (kg CO2 eq)	1.71027	0.461732
Seafood	Tilapia	Tryptophan (0.28 g)	LU (m2)	2.61622	0.454859
Seafood	Tilapia	Vit. A (800 ug)	EU (MJ)	NA	NA
Seafood	Tilapia	Vit. A (800 ug)	GWP (kg CO2 eq)	NA	NA
Seafood	Tilapia	Vit. A (800 ug)	LU (m2)	NA	NA
Seafood	Tilapia	Vit. B12 (2.4 ug)	EU (MJ)	9.22191	0.888448
Seafood	Tilapia	Vit. B12 (2.4 ug)	GWP (kg CO2 eq)	1.96706	0.28982
Seafood	Tilapia	Vit. B12 (2.4 ug)	LU (m2)	3.00904	0.282689
Seafood	Tilapia	Zn (15 mg)	EU (MJ)	273.544	23.6118
Seafood	Tilapia	Zn (15 mg)	GWP (kg CO2 eq)	58.3479	8.4339
Seafood	Tilapia	Zn (15 mg)	LU (m2)	89.2553	7.80933
Seafood	Tuna	Ca (1000 mg)	EU (MJ)	95.7893	6.70721
Seafood	Tuna	Ca (1000 mg)	GWP (kg CO2 eq)	9.22822	0.646188
Seafood	Tuna	Ca (1000 mg)	LU (m2)	0	0
Seafood	Tuna	EPA + DHA (250 mg)	EU (MJ)	2.64612	0.218997
Seafood	Tuna	EPA + DHA (250 mg)	GWP (kg CO2 eq)	0.254924	0.0211001
Seafood	Tuna	EPA + DHA (250 mg)	LU (m2)	0	0
Seafood	Tuna	Fe (14 mg)	EU (MJ)	30.3552	1.2675
Seafood	Tuna	Fe (14 mg)	GWP (kg CO2 eq)	2.92439	0.122122
Seafood	Tuna	Fe (14 mg)	LU (m2)	0	0
Seafood	Tuna	Lysine (2.1 g)	EU (MJ)	2.81694	0.233134
Seafood	Tuna	Lysine (2.1 g)	GWP (kg CO2 eq)	0.27138	0.0224622
Seafood	Tuna	Lysine (2.1 g)	LU (m2)	0	0
Seafood	Tuna	Methionine (0.73 g)	EU (MJ)	3.03012	0.250777
Seafood	Tuna	Methionine (0.73 g)	GWP (kg CO2 eq)	0.291918	0.0241621
Seafood	Tuna	Methionine (0.73 g)	LU (m2)	0	0
Seafood	Tuna	Protein (50 g)	EU (MJ)	6.17143	0.274872
Seafood	Tuna	Protein (50 g)	GWP (kg CO2 eq)	0.594547	0.0264833
Seafood	Tuna	Protein (50 g)	LU (m2)	0	0
Seafood	Tuna	Threonine (1.05 g)	EU (MJ)	2.95135	0.244258
Seafood	Tuna	Threonine (1.05 g)	GWP (kg CO2 eq)	0.28433	0.023534
Seafood	Tuna	Threonine (1.05 g)	LU (m2)	0	0
Seafood	Tuna	Tryptophan (0.28 g)	EU (MJ)	3.08412	0.255247
Seafood	Tuna	Tryptophan (0.28 g)	GWP (kg CO2 eq)	0.297121	0.0245927
Seafood	Tuna	Tryptophan (0.28 g)	LU (m2)	0	0
Seafood	Tuna	Vit. A (800 ug)	EU (MJ)	155.549	22.0909
Seafood	Tuna	Vit. A (800 ug)	GWP (kg CO2 eq)	14.9854	2.12823
Seafood	Tuna	Vit. A (800 ug)	LU (m2)	0	0
Seafood	Tuna	Vit. B12 (2.4 ug)	EU (MJ)	3.42268	0.283266
Seafood	Tuna	Vit. B12 (2.4 ug)	GWP (kg CO2 eq)	0.329737	0.0272924
Seafood	Tuna	Vit. B12 (2.4 ug)	LU (m2)	0	0
Seafood	Tuna	Zn (15 mg)	EU (MJ)	49.7688	2.35028
Seafood	Tuna	Zn (15 mg)	GWP (kg CO2 eq)	4.79466	0.226441
Seafood	Tuna	Zn (15 mg)	LU (m2)	0	0
[truncated: 100 more columns]

## Sheet: 3. Normalized values and RIW
Global warming (annual GHG emissions, tonnes)	China	United States	India	Russian Federation	Japan	Germany	Islamic Republic of Iran	Saudi Arabia	Indonesia	Canada	Mexico	South Africa	Brazil	Turkey	Australia	United Kingdom	Poland	France	Italy	Kazakhstan	Afghanistan	Albania	Algeria	Angola	Antigua and Barbuda	Argentina	Armenia	Austria	Azerbaijan	Bahrain	Barbados	Belarus	Belgium	Belize	Benin	Bolivia	Botswana	Brunei	Bulgaria	Burkina Faso	Burundi	Cameroon	Central African Republic	Chad	Chile	Colombia	Comoros	Congo	Croatia
2000	4276120000	6495120000	1664020000	2418990000	1174850000	922880000	466630000	291530000	1406680000	731300000	556170000	345420000	1646960000	262940000	608160000	679530000	356570000	474740000	472220000	148460000	15050000	8400000	127650000	161840000	610000	366340000	6130000	66220000	59130000	23980000	3510000	66680000	134840000	5580000	23310000	110950000	68300000	18670000	46380000	28770000	12240000	197560000	66260000	34720000	59240000	286060000	380000	19770000	13760000
2001	4452290000	6439610000	1569360000	2329980000	1189350000	970630000	480140000	297910000	1663980000	903030000	550630000	380990000	1899730000	232390000	700990000	687320000	345710000	425190000	469300000	148420000	13470000	9030000	125230000	143580000	650000	383270000	6300000	75320000	59660000	24890000	3550000	58020000	135090000	7130000	18460000	109950000	55530000	18620000	46640000	25190000	9200000	196880000	60880000	30420000	62760000	309040000	420000	26530000	14550000
2002	4762980000	6321650000	1591500000	2381150000	1225230000	952160000	504890000	318210000	2199080000	981570000	557000000	396800000	1945010000	242670000	688480000	668260000	338060000	417550000	477710000	164970000	16100000	9720000	132440000	164500000	690000	386170000	5920000	77000000	60600000	26020000	3540000	64650000	127830000	9570000	19700000	118540000	148320000	18750000	43610000	26520000	10170000	195310000	57130000	34250000	63710000	308210000	430000	22970000	15540000
2003	5385870000	6353160000	1634280000	2552060000	1231650000	951080000	534120000	331490000	1822690000	1001570000	584260000	417930000	1958830000	254510000	620390000	677150000	350130000	422770000	495790000	176440000	16780000	10090000	138300000	181040000	740000	408490000	6370000	82930000	58280000	27060000	3580000	60280000	131300000	10170000	19550000	114410000	89410000	19790000	48420000	29100000	10380000	203040000	64800000	36170000	6.463e+07	317930000	450000	35800000	16600000
2004	6132260000	6500270000	1728850000	2443690000	1219100000	931260000	571070000	349910000	2205430000	961050000	583840000	445750000	2005240000	260870000	664400000	670800000	354020000	419890000	506070000	193920000	16350000	10150000	142190000	193160000	780000	436710000	6780000	82530000	59580000	27380000	3620000	61440000	1.2995e+08	6880000	19450000	133000000	30240000	19420000	47140000	30020000	9590000	199660000	59650000	37440000	70000000	319580000	460000	40170000	16350000
2005	6856610000	6477600000	1803320000	2492300000	1224800000	906560000	609880000	367360000	1912930000	971700000	611100000	447080000	2015480000	273390000	622460000	664400000	355740000	420500000	507320000	206010000	17090000	9920000	147710000	191800000	810000	428510000	7430000	82420000	63560000	30490000	3670000	62510000	125900000	9280000	20920000	128550000	79240000	19430000	47220000	30740000	8860000	206730000	61910000	39530000	70880000	316150000	530000	51250000	1.622e+07
2006	7483960000	6388860000	1936950000	2379410000	1103330000	918190000	658380000	390250000	2681880000	882120000	626780000	447830000	1420950000	277830000	637390000	661660000	286660000	434960000	495920000	227440000	20740000	8750000	145930000	165860000	960000	462740000	7950000	82820000	60100000	32930000	3760000	58370000	123680000	7520000	21400000	133330000	41570000	21300000	51140000	32500000	3140000	197700000	60350000	56930000	71460000	310830000	500000	47720000	19020000
2007	8102460000	6601130000	2078820000	2352000000	1144400000	888290000	696800000	412810000	2057190000	894320000	648260000	468370000	1466130000	307700000	628770000	645620000	286630000	428160000	488700000	235740000	24780000	9060000	153160000	196180000	1020000	465580000	8570000	80370000	58760000	34060000	3770000	55540000	119450000	9800000	22490000	142360000	83790000	20420000	55520000	33500000	2690000	202370000	61960000	57570000	79860000	318810000	420000	43360000	20590000
2008	8.39681e+09	6267350000	2170720000	2616540000	1.06532e+09	892660000	710220000	450540000	2043340000	877950000	678720000	502330000	1454360000	306300000	597420000	624230000	280380000	422460000	475470000	282100000	31390000	8530000	157230000	173970000	1070000	482380000	9140000	80160000	6.632e+07	36410000	4040000	59680000	121290000	8.36e+06	22040000	135580000	46180000	20330000	53010000	34020000	3440000	204680000	64730000	57150000	84530000	317540000	450000	37900000	19730000
2009	8989400000	5865860000	2355660000	2281070000	1002880000	834120000	734520000	470820000	2475020000	800900000	662870000	482210000	1433190000	309800000	617920000	568840000	264550000	405180000	429390000	251270000	37720000	8640000	166450000	180680000	1140000	469510000	8050000	72870000	67230000	37030000	4040000	57120000	114360000	7130000	22850000	133100000	28280000	20080000	45610000	35020000	3810000	202260000	58070000	55400000	81790000	321640000	470000	35640000	17180000
2010	9788640000	6111810000	2457760000	2401660000	1055530000	864720000	740760000	515510000	2049350000	884340000	665540000	490010000	1540260000	319510000	579140000	581780000	282520000	409040000	437790000	277170000	44750000	8850000	167180000	186780000	1170000	451700000	7830000	78380000	71510000	38960000	3950000	61380000	121560000	9290000	23480000	169750000	37590000	19090000	47270000	36190000	3920000	201390000	62100000	56890000	86460000	325720000	520000	43120000	16540000
2011	10781300000	6235850000	2800430000	2478200000	1261050000	812510000	817820000	534470000	2276710000	756740000	681940000	476140000	1307810000	332180000	617790000	538110000	360530000	353480000	427740000	294110000	58620000	9290000	179590000	220880000	1080000	460120000	8260000	75850000	74010000	39680000	3930000	84510000	109550000	7190000	23680000	142710000	47860000	17600000	53100000	34310000	7410000	200930000	6.646e+07	57230000	4720000	183900000	500000	51940000	22130000
2012	11106420000	5936090000	2943690000	2541380000	1308390000	826220000	825980000	568120000	2319980000	791740000	672080000	496320000	1353140000	346170000	617860000	559760000	353510000	356760000	412410000	294070000	67050000	8950000	189600000	185500000	1100000	478030000	9180000	73200000	75300000	40880000	3930000	88330000	108860000	3310000	23620000	138620000	34180000	17690000	47340000	34920000	7240000	199180000	63840000	57970000	2620000	182280000	520000	49220000	20100000
2013	11570950000	6056310000	2994460000	2413770000	1335180000	844050000	846810000	585750000	2294460000	857340000	667840000	505110000	1368380000	337450000	529260000	541180000	348120000	357600000	381690000	307530000	76290000	9010000	193450000	202250000	1110000	466520000	9130000	73790000	74980000	43760000	3930000	87040000	109670000	7640000	24070000	137590000	66340000	17490000	42310000	35940000	7870000	209020000	67210000	57210000	280000	192090000	550000	50940000	19000000
2014	11592120000	6097750000	3163700000	2414840000	1297470000	803720000	858830000	629140000	2732160000	819390000	655740000	5.2054e+08	1413430000	362310000	537950000	500980000	335050000	324660000	362620000	290050000	86600000	9510000	203810000	183480000	1130000	467820000	9110000	70160000	75230000	45900000	3750000	88040000	103620000	3580000	24570000	138600000	34320000	17400000	44780000	36110000	7600000	202930000	67550000	56720000	5680000	200850000	550000	32200000	18260000
2015	11584220000	5966460000	3177200000	2316810000	1266660000	808910000	853360000	660580000	2779090000	861770000	677890000	495390000	1409940000	369100000	536330000	484630000	338940000	331300000	373600000	285710000	93540000	9300000	212510000	206030000	1350000	470550000	8730000	71490000	73870000	46970000	4260000	84200000	108550000	5210000	25420000	141570000	131850000	1.658e+07	47260000	37280000	7350000	207500000	70830000	96870000	570000	199710000	590000	47890000	18850000
2016	11576870000	5833490000	3235660000	2391380000	1263870000	808730000	867960000	663580000	2229000000	779270000	688380000	497390000	1379380000	395950000	519090000	461540000	349760000	329600000	369630000	289020000	96590000	9190000	210090000	180120000	1380000	482080000	9460000	71850000	73980000	47070000	4350000	80700000	107350000	4860000	26530000	150940000	69990000	16800000	44070000	38630000	7740000	208380000	75730000	101970000	3740000	232000000	600000	49770000	18940000
Global warming GHG emission per year in kg	China	United States	India	Russian Federation	Japan	Germany	Islamic Republic of Iran	Saudi Arabia	Indonesia	Canada	Mexico	South Africa	Brazil	Turkey	Australia	United Kingdom	Poland	France	Italy	Kazakhstan	Afghanistan	Albania	Algeria	Angola	Antigua and Barbuda	Argentina	Armenia	Austria	Azerbaijan	Bahrain	Barbados	Belarus	Belgium	Belize	Benin	Bolivia	Botswana	Brunei	Bulgaria	Burkina Faso	Burundi	Cameroon	Central African Republic	Chad	Chile	Colombia	Comoros	Congo	Croatia
2000	4276120000000	6495120000000	1664020000000	2418990000000	1174850000000	922880000000	466630000000	291530000000	1406680000000	731300000000	556170000000	345420000000	1646960000000	262940000000	608160000000	679530000000	356570000000	474740000000	472220000000	148460000000	15050000000	8400000000	127650000000	161840000000	610000000	366340000000	6130000000	66220000000	59130000000	23980000000	3510000000	66680000000	134840000000	5580000000	23310000000	110950000000	68300000000	18670000000	46380000000	28770000000	12240000000	197560000000	66260000000	34720000000	59240000000	286060000000	380000000	19770000000	13760000000
2001	4452290000000	6439610000000	1569360000000	2329980000000	1189350000000	970630000000	480140000000	297910000000	1663980000000	903030000000	550630000000	380990000000	1899730000000	232390000000	700990000000	687320000000	345710000000	425190000000	469300000000	148420000000	13470000000	9030000000	125230000000	143580000000	650000000	383270000000	6300000000	75320000000	59660000000	24890000000	3550000000	58020000000	135090000000	7130000000	18460000000	109950000000	55530000000	18620000000	46640000000	25190000000	9200000000	196880000000	60880000000	30420000000	62760000000	309040000000	420000000	26530000000	14550000000
2002	4762980000000	6321650000000	1591500000000	2381150000000	1225230000000	952160000000	504890000000	318210000000	2199080000000	981570000000	557000000000	396800000000	1945010000000	242670000000	688480000000	668260000000	338060000000	417550000000	477710000000	164970000000	16100000000	9720000000	132440000000	164500000000	690000000	386170000000	5920000000	77000000000	60600000000	26020000000	3540000000	64650000000	127830000000	9570000000	19700000000	118540000000	148320000000	18750000000	43610000000	26520000000	10170000000	195310000000	57130000000	34250000000	63710000000	308210000000	430000000	22970000000	15540000000
2003	5385870000000	6353160000000	1634280000000	2552060000000	1231650000000	951080000000	534120000000	331490000000	1822690000000	1001570000000	584260000000	417930000000	1958830000000	254510000000	620390000000	677150000000	350130000000	422770000000	495790000000	176440000000	16780000000	10090000000	138300000000	181040000000	740000000	408490000000	6370000000	82930000000	58280000000	27060000000	3580000000	60280000000	131300000000	10170000000	19550000000	114410000000	89410000000	19790000000	48420000000	29100000000	10380000000	203040000000	64800000000	36170000000	64630000000	317930000000	450000000	35800000000	16600000000
2004	6132260000000	6500270000000	1728850000000	2443690000000	1219100000000	931260000000	571070000000	349910000000	2205430000000	961050000000	583840000000	445750000000	2005240000000	260870000000	664400000000	670800000000	354020000000	419890000000	506070000000	193920000000	16350000000	10150000000	142190000000	193160000000	780000000	436710000000	6780000000	82530000000	59580000000	27380000000	3620000000	61440000000	129950000000	6880000000	19450000000	133000000000	30240000000	19420000000	47140000000	30020000000	9590000000	199660000000	59650000000	37440000000	70000000000	319580000000	460000000	40170000000	16350000000
2005	6856610000000	6477600000000	1803320000000	2492300000000	1224800000000	906560000000	609880000000	367360000000	1912930000000	971700000000	611100000000	447080000000	2015480000000	273390000000	622460000000	664400000000	355740000000	420500000000	507320000000	206010000000	17090000000	9920000000	147710000000	191800000000	810000000	428510000000	7430000000	82420000000	63560000000	30490000000	3670000000	62510000000	125900000000	9280000000	20920000000	128550000000	79240000000	19430000000	47220000000	30740000000	8860000000	206730000000	61910000000	39530000000	70880000000	316150000000	530000000	51250000000	16220000000
2006	7483960000000	6388860000000	1936950000000	2379410000000	1103330000000	918190000000	658380000000	390250000000	2681880000000	882120000000	626780000000	447830000000	1420950000000	277830000000	637390000000	661660000000	286660000000	434960000000	495920000000	227440000000	20740000000	8750000000	145930000000	165860000000	960000000	462740000000	7950000000	82820000000	60100000000	32930000000	3760000000	58370000000	123680000000	7520000000	21400000000	133330000000	41570000000	21300000000	51140000000	32500000000	3140000000	197700000000	60350000000	56930000000	71460000000	310830000000	500000000	47720000000	19020000000
2007	8102460000000	6601130000000	2078820000000	2352000000000	1144400000000	888290000000	696800000000	412810000000	2057190000000	894320000000	648260000000	468370000000	1466130000000	307700000000	628770000000	645620000000	286630000000	428160000000	488700000000	235740000000	24780000000	9060000000	153160000000	196180000000	1020000000	465580000000	8570000000	80370000000	58760000000	34060000000	3770000000	55540000000	119450000000	9800000000	22490000000	142360000000	83790000000	20420000000	55520000000	33500000000	2690000000	202370000000	61960000000	57570000000	79860000000	318810000000	420000000	43360000000	20590000000
2008	8396810000000	6267350000000	2170720000000	2616540000000	1065320000000	892660000000	710220000000	450540000000	2043340000000	877950000000	678720000000	502330000000	1454360000000	306300000000	597420000000	624230000000	280380000000	422460000000	475470000000	282100000000	31390000000	8530000000	157230000000	173970000000	1070000000	482380000000	9140000000	80160000000	66320000000	36410000000	4040000000	59680000000	121290000000	8360000000	22040000000	135580000000	46180000000	20330000000	53010000000	34020000000	3440000000	204680000000	64730000000	57150000000	84530000000	317540000000	450000000	37900000000	19730000000
2009	8989400000000	5865860000000	2355660000000	2281070000000	1002880000000	834120000000	734520000000	470820000000	2475020000000	800900000000	662870000000	482210000000	1433190000000	309800000000	617920000000	568840000000	264550000000	405180000000	429390000000	251270000000	37720000000	8640000000	166450000000	180680000000	1140000000	469510000000	8050000000	72870000000	67230000000	37030000000	4040000000	57120000000	114360000000	7130000000	22850000000	133100000000	28280000000	20080000000	45610000000	35020000000	3810000000	202260000000	58070000000	55400000000	81790000000	321640000000	470000000	35640000000	17180000000
2010	9788640000000	6111810000000	2457760000000	2401660000000	1055530000000	864720000000	740760000000	515510000000	2049350000000	884340000000	665540000000	490010000000	1540260000000	319510000000	579140000000	581780000000	282520000000	409040000000	437790000000	277170000000	44750000000	8850000000	167180000000	186780000000	1170000000	451700000000	7830000000	78380000000	71510000000	38960000000	3950000000	61380000000	121560000000	9290000000	23480000000	169750000000	37590000000	19090000000	47270000000	36190000000	3920000000	201390000000	62100000000	56890000000	86460000000	325720000000	520000000	43120000000	16540000000
2011	10781300000000	6235850000000	2800430000000	2478200000000	1261050000000	812510000000	817820000000	534470000000	2276710000000	756740000000	681940000000	476140000000	1307810000000	332180000000	617790000000	538110000000	360530000000	353480000000	427740000000	294110000000	58620000000	9290000000	179590000000	220880000000	1080000000	460120000000	8260000000	75850000000	74010000000	39680000000	3930000000	84510000000	109550000000	7190000000	23680000000	142710000000	47860000000	17600000000	53100000000	34310000000	7410000000	200930000000	66460000000	57230000000	4720000000	183900000000	500000000	51940000000	22130000000
2012	11106420000000	5936090000000	2943690000000	2541380000000	1308390000000	826220000000	825980000000	568120000000	2319980000000	791740000000	672080000000	496320000000	1353140000000	346170000000	617860000000	559760000000	353510000000	356760000000	412410000000	294070000000	67050000000	8950000000	189600000000	185500000000	1100000000	478030000000	9180000000	73200000000	75300000000	40880000000	3930000000	88330000000	108860000000	3310000000	23620000000	138620000000	34180000000	17690000000	47340000000	34920000000	7240000000	199180000000	63840000000	57970000000	2620000000	182280000000	520000000	49220000000	20100000000
2013	11570950000000	6056310000000	2994460000000	2413770000000	1335180000000	844050000000	846810000000	585750000000	2294460000000	857340000000	667840000000	505110000000	1368380000000	337450000000	529260000000	541180000000	348120000000	357600000000	381690000000	307530000000	76290000000	9010000000	193450000000	202250000000	1110000000	466520000000	9130000000	73790000000	74980000000	43760000000	3930000000	87040000000	109670000000	7640000000	24070000000	137590000000	66340000000	17490000000	42310000000	35940000000	7870000000	209020000000	67210000000	57210000000	280000000	192090000000	550000000	50940000000	19000000000
2014	11592120000000	6097750000000	3163700000000	2414840000000	1297470000000	803720000000	858830000000	629140000000	2732160000000	819390000000	655740000000	520540000000	1413430000000	362310000000	537950000000	500980000000	335050000000	324660000000	362620000000	290050000000	86600000000	9510000000	203810000000	183480000000	1130000000	467820000000	9110000000	70160000000	75230000000	45900000000	3750000000	88040000000	103620000000	3580000000	24570000000	138600000000	34320000000	17400000000	44780000000	36110000000	7600000000	202930000000	67550000000	56720000000	5680000000	200850000000	550000000	32200000000	18260000000
2015	11584220000000	5966460000000	3177200000000	2316810000000	1266660000000	808910000000	853360000000	660580000000	2779090000000	861770000000	677890000000	495390000000	1409940000000	369100000000	536330000000	484630000000	338940000000	331300000000	373600000000	285710000000	93540000000	9300000000	212510000000	206030000000	1350000000	470550000000	8730000000	71490000000	73870000000	46970000000	4260000000	84200000000	108550000000	5210000000	25420000000	141570000000	131850000000	16580000000	47260000000	37280000000	7350000000	207500000000	70830000000	96870000000	570000000	199710000000	590000000	47890000000	18850000000
2016	11576870000000	5833490000000	3235660000000	2391380000000	1263870000000	808730000000	867960000000	663580000000	2229000000000	779270000000	688380000000	497390000000	1379380000000	395950000000	519090000000	461540000000	349760000000	329600000000	369630000000	289020000000	96590000000	9190000000	210090000000	180120000000	1380000000	482080000000	9460000000	71850000000	73980000000	47070000000	4350000000	80700000000	107350000000	4860000000	26530000000	150940000000	69990000000	16800000000	44070000000	38630000000	7740000000	208380000000	75730000000	101970000000	3740000000	232000000000	600000000	49770000000	18940000000
Water use (total water withdrawal, 10*9 m3)	China	United States	India	Russian Federation	Japan	Germany	Islamic Republic of Iran	Saudi Arabia	Indonesia	Canada	Mexico	South Africa	Brazil	Turkey	Australia	United Kingdom	Poland	France	Italy	Kazakhstan	Afghanistan	Albania	Algeria	Angola	Antigua and Barbuda	Argentina	Armenia	Austria	Azerbaijan	Bahrain	Barbados	Belarus	Belgium	Belize	Benin	Bolivia	Botswana	Brunei	Bulgaria	Burkina Faso	Burundi	Cameroon	Central African Republic	Chad	Chile	Colombia	Comoros	Congo	Croatia
2000	551.5	560.6	640.5	65.77	84.65	37.75	90.9	21.71	133.6	40.76	72.6	13.21	56.79	38.4	20.97	13.93	11.73	32.37	41.97	22.27	20.32	1.663	6.061	0.6666	0.0077	31.79	1.733	3.579	10.07	0.3538	0.081	1.785	6.738	0.101	0.1387	1.998	0.198	0.092	6.589	0.7566	0.2848	1.015	0.0687	0.8614	31.1	8.751	0.01	0.046	0.5735
2001	551.5	560.6	640.5	65.77	84.65	37.75	90.9	21.71	133.6	40.76	72.6	13.21	56.79	38.4	20.97	13.93	11.73	32.37	41.97	22.27	20.32	1.663	6.061	0.6666	0.0077	31.79	1.733	3.579	10.07	0.3538	0.081	1.785	6.738	0.101	0.1387	1.998	0.198	0.092	6.589	0.7566	0.2848	1.015	0.0687	0.8614	31.1	8.751	0.01	0.046	0.5735
2002	551.5	560.6	640.5	65.77	84.65	37.75	90.9	21.71	133.6	40.76	72.6	13.21	56.79	38.4	20.97	13.93	11.73	32.37	41.97	22.27	20.32	1.663	6.061	0.6666	0.0077	31.79	1.733	3.579	10.07	0.3538	0.081	1.785	6.738	0.101	0.1387	1.998	0.198	0.092	6.589	0.7566	0.2848	1.015	0.0687	0.8614	31.1	8.751	0.01	0.046	0.5735
2003	571.3	531.7	715.8	63.6	82.98	32.3	93.3	23.2	176.2	41.32	78.95	14.25	62.26	39.27	16.41	8.513	12.03	31.41	33.6	22.81	20.37	1.268	7.243	0.7058	0.0093	35.12	2.823	3.418	12.27	0.3833	0.081	1.643	6.217	0.101	0.1823	2.074	0.2018	0.092	6.202	0.818	0.2801	1.088	0.0725	0.8796	35.43	11.26	0.01	0.0917	0.651
2004	571.3	531.7	715.8	63.6	82.98	32.3	93.3	23.2	176.2	41.32	78.95	14.25	62.26	39.27	16.41	8.513	12.03	31.41	33.6	22.81	20.37	1.268	7.243	0.7058	0.0093	35.12	2.823	3.418	12.27	0.3833	0.081	1.643	6.217	0.101	0.1823	2.074	0.2018	0.092	6.202	0.818	0.2801	1.088	0.0725	0.8796	35.43	11.26	0.01	0.0917	0.651
2005	571.3	531.7	715.8	63.6	82.98	32.3	93.3	23.2	176.2	41.32	78.95	14.25	62.26	39.27	16.41	8.513	12.03	31.41	33.6	22.81	20.37	1.268	7.243	0.7058	0.0093	35.12	2.823	3.418	12.27	0.3833	0.081	1.643	6.217	0.101	0.1823	2.074	0.2018	0.092	6.202	0.818	0.2801	1.088	0.0725	0.8796	35.43	11.26	0.01	0.0917	0.651
2006	571.3	531.7	715.8	63.6	82.98	32.3	93.3	23.2	176.2	41.32	78.95	14.25	62.26	39.27	16.41	8.513	12.03	31.41	33.6	22.81	20.37	1.268	7.243	0.7058	0.0093	35.12	2.823	3.418	12.27	0.3833	0.081	1.643	6.217	0.101	0.1823	2.074	0.2018	0.092	6.202	0.818	0.2801	1.088	0.0725	0.8796	35.43	11.26	0.01	0.0917	0.651
2007	571.3	531.7	715.8	63.6	82.98	32.3	93.3	23.2	176.2	41.32	78.95	14.25	62.26	39.27	16.41	8.513	12.03	31.41	33.6	22.81	20.37	1.268	7.243	0.7058	0.0093	35.12	2.823	3.418	12.27	0.3833	0.081	1.643	6.217	0.101	0.1823	2.074	0.2018	0.092	6.202	0.818	0.2801	1.088	0.0725	0.8796	35.43	11.26	0.01	0.0917	0.651
2008	603.3	469.1	761	61.43	81.45	26.31	93.3	20.88	206.4	38.57	82.73	15.29	69.93	50.51	16.02	8.214	11.48	28.06	34.13	21.39	20.37	1.195	8.425	0.7058	0.0115	37.78	2.941	3.492	11.97	0.4157	0.081	1.525	4.994	0.101	0.2259	2.088	0.1943	0.092	5.715	0.818	0.2801	1.088	0.0725	0.8796	35.43	12.69	0.01	0.0917	0.6963
2009	603.3	469.1	761	61.43	81.45	26.31	93.3	20.88	206.4	38.57	82.73	15.29	69.93	50.51	16.02	8.214	11.48	28.06	34.13	21.39	20.37	1.195	8.425	0.7058	0.0115	37.78	2.941	3.492	11.97	0.4157	0.081	1.525	4.994	0.101	0.2259	2.088	0.1943	0.092	5.715	0.818	0.2801	1.088	0.0725	0.8796	35.43	12.69	0.01	0.0917	0.6963
2010	603.3	469.1	761	61.43	81.45	26.31	93.3	20.88	206.4	38.57	82.73	15.29	69.93	50.51	16.02	8.214	11.48	28.06	34.13	21.39	20.37	1.195	8.425	0.7058	0.0115	37.78	2.941	3.492	11.97	0.4157	0.081	1.525	4.994	0.101	0.2259	2.088	0.1943	0.092	5.715	0.818	0.2801	1.088	0.0725	0.8796	35.43	12.69	0.01	0.0917	0.6963
2011	603.3	469.1	761	61.43	81.45	26.31	93.3	20.88	206.4	38.57	82.73	15.29	69.93	50.51	16.02	8.214	11.48	28.06	34.13	21.39	20.37	1.195	8.425	0.7058	0.0115	37.78	2.941	3.492	11.97	0.4157	0.081	1.525	4.994	0.101	0.2259	2.088	0.1943	0.092	5.715	0.818	0.2801	1.088	0.0725	0.8796	35.43	12.69	0.01	0.0917	0.6963
2012	603.3	469.1	761	61.43	81.45	26.31	93.3	20.88	206.4	38.57	82.73	15.29	69.93	50.51	16.02	8.214	11.48	28.06	34.13	21.39	20.37	1.195	8.425	0.7058	0.0115	37.78	2.941	3.492	11.97	0.4157	0.081	1.525	4.994	0.101	0.2259	2.088	0.1943	0.092	5.715	0.818	0.2801	1.088	0.0725	0.8796	35.43	12.69	0.01	0.0917	0.6963
2013	598.1	444.3	761	64.41	81.45	24.44	93.3	23.35	222.6	35.6	87.84	19.38	65.68	58.96	16.55	8.42	10.08	26.41	34.19	24.45	20.37	1.42	10.46	0.7058	0.0115	37.78	2.866	3.492	12.78	0.4344	0.081	1.397	3.994	0.101	0.234	2.088	0.193	0.092	5.659	0.818	0.2801	1.088	0.0725	0.8796	35.43	13.61	0.01	0.0917	0.715
2014	598.1	444.3	761	64.41	81.45	24.44	93.3	23.35	222.6	35.6	87.84	19.38	65.68	58.96	16.55	8.42	10.08	26.41	34.19	24.45	20.37	1.42	10.46	0.7058	0.0115	37.78	2.866	3.492	12.78	0.4344	0.081	1.397	3.994	0.101	0.234	2.088	0.193	0.092	5.659	0.818	0.2801	1.088	0.0725	0.8796	35.43	13.61	0.01	0.0917	0.715
2015	598.1	444.3	761	64.41	81.45	24.44	93.3	23.35	222.6	35.6	87.84	19.38	65.68	58.96	16.55	8.42	10.08	26.41	34.19	24.45	20.37	1.42	10.46	0.7058	0.0115	37.78	2.866	3.492	12.78	0.4344	0.081	1.397	3.994	0.101	0.234	2.088	0.193	0.092	5.659	0.818	0.2801	1.088	0.0725	0.8796	35.43	13.61	0.01	0.0917	0.715
2016	598.1	444.3	761	64.41	81.45	24.44	93.3	23.35	222.6	35.6	87.84	19.38	65.68	58.96	16.55	8.42	10.08	26.41	34.19	24.45	20.37	1.42	10.46	0.7058	0.0115	37.78	2.866	3.492	12.78	0.4344	0.081	1.397	3.994	0.101	0.234	2.088	0.193	0.092	5.659	0.818	0.2801	1.088	0.0725	0.8796	35.43	13.61	0.01	0.0917	0.715
Water Use 10^9m3 (Total Water Withdrawl converted from m3 to litres)	China	United States	India	Russian Federation	Japan	Germany	Islamic Republic of Iran	Saudi Arabia	Indonesia	Canada	Mexico	South Africa	Brazil	Turkey	Australia	United Kingdom	Poland	France	Italy	Kazakhstan	Afghanistan	Albania	Algeria	Angola	Antigua and Barbuda	Argentina	Armenia	Austria	Azerbaijan	Bahrain	Barbados	Belarus	Belgium	Belize	Benin	Bolivia	Botswana	Brunei	Bulgaria	Burkina Faso	Burundi	Cameroon	Central African Republic	Chad	Chile	Colombia	Comoros	Congo	Croatia
2000	551500000000000	560600000000000	640500000000000	65770000000000	84650000000000	37750000000000	90900000000000	21710000000000	133600000000000	40760000000000	72600000000000	13210000000000	56790000000000	38400000000000	20970000000000	13930000000000	11730000000000	32370000000000	41970000000000	22270000000000	20320000000000	1663000000000	6061000000000	666600000000	7700000000	31790000000000	1733000000000	3579000000000	10070000000000	353800000000	81000000000	1785000000000	6738000000000	101000000000	138700000000	1998000000000	198000000000	92000000000	6589000000000	756600000000	284800000000	1015000000000	68700000000	861400000000	31100000000000	8751000000000	10000000000	46000000000	573500000000
2001	551500000000000	560600000000000	640500000000000	65770000000000	84650000000000	37750000000000	90900000000000	21710000000000	133600000000000	40760000000000	72600000000000	13210000000000	56790000000000	38400000000000	20970000000000	13930000000000	11730000000000	32370000000000	41970000000000	22270000000000	20320000000000	1663000000000	6061000000000	666600000000	7700000000	31790000000000	1733000000000	3579000000000	10070000000000	353800000000	81000000000	1785000000000	6738000000000	101000000000	138700000000	1998000000000	198000000000	92000000000	6589000000000	756600000000	284800000000	1015000000000	68700000000	861400000000	31100000000000	8751000000000	10000000000	46000000000	573500000000
2002	551500000000000	560600000000000	640500000000000	65770000000000	84650000000000	37750000000000	90900000000000	21710000000000	133600000000000	40760000000000	72600000000000	13210000000000	56790000000000	38400000000000	20970000000000	13930000000000	11730000000000	32370000000000	41970000000000	22270000000000	20320000000000	1663000000000	6061000000000	666600000000	7700000000	31790000000000	1733000000000	3579000000000	10070000000000	353800000000	81000000000	1785000000000	6738000000000	101000000000	138700000000	1998000000000	198000000000	92000000000	6589000000000	756600000000	284800000000	1015000000000	68700000000	861400000000	31100000000000	8751000000000	10000000000	46000000000	573500000000
2003	571300000000000	531700000000000	715800000000000	63600000000000	82980000000000	32300000000000	93300000000000	23200000000000	176200000000000	41320000000000	78950000000000	14250000000000	62260000000000	39270000000000	16410000000000	8513000000000	12030000000000	31410000000000	33600000000000	22810000000000	20370000000000	1268000000000	7243000000000	705800000000	9300000000	35120000000000	2823000000000	3418000000000	12270000000000	383300000000	81000000000	1643000000000	6217000000000	101000000000	182300000000	2074000000000	201800000000	92000000000	6202000000000	818000000000	280100000000	1088000000000	72500000000	879600000000	35430000000000	11260000000000	10000000000	91700000000	651000000000
2004	571300000000000	531700000000000	715800000000000	63600000000000	82980000000000	32300000000000	93300000000000	23200000000000	176200000000000	41320000000000	78950000000000	14250000000000	62260000000000	39270000000000	16410000000000	8513000000000	12030000000000	31410000000000	33600000000000	22810000000000	20370000000000	1268000000000	7243000000000	705800000000	9300000000	35120000000000	2823000000000	3418000000000	12270000000000	383300000000	81000000000	1643000000000	6217000000000	101000000000	182300000000	2074000000000	201800000000	92000000000	6202000000000	818000000000	280100000000	1088000000000	72500000000	879600000000	35430000000000	11260000000000	10000000000	91700000000	651000000000
2005	571300000000000	531700000000000	715800000000000	63600000000000	82980000000000	32300000000000	93300000000000	23200000000000	176200000000000	41320000000000	78950000000000	14250000000000	62260000000000	39270000000000	16410000000000	8513000000000	12030000000000	31410000000000	33600000000000	22810000000000	20370000000000	1268000000000	7243000000000	705800000000	9300000000	35120000000000	2823000000000	3418000000000	12270000000000	383300000000	81000000000	1643000000000	6217000000000	101000000000	182300000000	2074000000000	201800000000	92000000000	6202000000000	818000000000	280100000000	1088000000000	72500000000	879600000000	35430000000000	11260000000000	10000000000	91700000000	651000000000
2006	571300000000000	531700000000000	715800000000000	63600000000000	82980000000000	32300000000000	93300000000000	23200000000000	176200000000000	41320000000000	78950000000000	14250000000000	62260000000000	39270000000000	16410000000000	8513000000000	12030000000000	31410000000000	33600000000000	22810000000000	20370000000000	1268000000000	7243000000000	705800000000	9300000000	35120000000000	2823000000000	3418000000000	12270000000000	383300000000	81000000000	1643000000000	6217000000000	101000000000	182300000000	2074000000000	201800000000	92000000000	6202000000000	818000000000	280100000000	1088000000000	72500000000	879600000000	35430000000000	11260000000000	10000000000	91700000000	651000000000
2007	571300000000000	531700000000000	715800000000000	63600000000000	82980000000000	32300000000000	93300000000000	23200000000000	176200000000000	41320000000000	78950000000000	14250000000000	62260000000000	39270000000000	16410000000000	8513000000000	12030000000000	31410000000000	33600000000000	22810000000000	20370000000000	1268000000000	7243000000000	705800000000	9300000000	35120000000000	2823000000000	3418000000000	12270000000000	383300000000	81000000000	1643000000000	6217000000000	101000000000	182300000000	2074000000000	201800000000	92000000000	6202000000000	818000000000	280100000000	1088000000000	72500000000	879600000000	35430000000000	11260000000000	10000000000	91700000000	651000000000
2008	603300000000000	469100000000000	761000000000000	61430000000000	81450000000000	26310000000000	93300000000000	20880000000000	206400000000000	38570000000000	82730000000000	15290000000000	69930000000000	50510000000000	16020000000000	8214000000000	11480000000000	28060000000000	34130000000000	21390000000000	20370000000000	1195000000000	8425000000000	705800000000	11500000000	37780000000000	2941000000000	3492000000000	11970000000000	415700000000	81000000000	1525000000000	4994000000000	101000000000	225900000000	2088000000000	194300000000	92000000000	5715000000000	818000000000	280100000000	1088000000000	72500000000	879600000000	35430000000000	12690000000000	10000000000	91700000000	696300000000
2009	603300000000000	469100000000000	761000000000000	61430000000000	81450000000000	26310000000000	93300000000000	20880000000000	206400000000000	38570000000000	82730000000000	15290000000000	69930000000000	50510000000000	16020000000000	8214000000000	11480000000000	28060000000000	34130000000000	21390000000000	20370000000000	1195000000000	8425000000000	705800000000	11500000000	37780000000000	2941000000000	3492000000000	11970000000000	415700000000	81000000000	1525000000000	4994000000000	101000000000	225900000000	2088000000000	194300000000	92000000000	5715000000000	818000000000	280100000000	1088000000000	72500000000	879600000000	35430000000000	12690000000000	10000000000	91700000000	696300000000
2010	603300000000000	469100000000000	761000000000000	61430000000000	81450000000000	26310000000000	93300000000000	20880000000000	206400000000000	38570000000000	82730000000000	15290000000000	69930000000000	50510000000000	16020000000000	8214000000000	11480000000000	28060000000000	34130000000000	21390000000000	20370000000000	1195000000000	8425000000000	705800000000	11500000000	37780000000000	2941000000000	3492000000000	11970000000000	415700000000	81000000000	1525000000000	4994000000000	101000000000	225900000000	2088000000000	194300000000	92000000000	5715000000000	818000000000	280100000000	1088000000000	72500000000	879600000000	35430000000000	12690000000000	10000000000	91700000000	696300000000
2011	603300000000000	469100000000000	761000000000000	61430000000000	81450000000000	26310000000000	93300000000000	20880000000000	206400000000000	38570000000000	82730000000000	15290000000000	69930000000000	50510000000000	16020000000000	8214000000000	11480000000000	28060000000000	34130000000000	21390000000000	20370000000000	1195000000000	8425000000000	705800000000	11500000000	37780000000000	2941000000000	3492000000000	11970000000000	415700000000	81000000000	1525000000000	4994000000000	101000000000	225900000000	2088000000000	194300000000	92000000000	5715000000000	818000000000	280100000000	1088000000000	72500000000	879600000000	35430000000000	12690000000000	10000000000	91700000000	696300000000
2012	603300000000000	469100000000000	761000000000000	61430000000000	81450000000000	26310000000000	93300000000000	20880000000000	206400000000000	38570000000000	82730000000000	15290000000000	69930000000000	50510000000000	16020000000000	8214000000000	11480000000000	28060000000000	34130000000000	21390000000000	20370000000000	1195000000000	8425000000000	705800000000	11500000000	37780000000000	2941000000000	3492000000000	11970000000000	415700000000	81000000000	1525000000000	4994000000000	101000000000	225900000000	2088000000000	194300000000	92000000000	5715000000000	818000000000	280100000000	1088000000000	72500000000	879600000000	35430000000000	12690000000000	10000000000	91700000000	696300000000
2013	598100000000000	444300000000000	761000000000000	64410000000000	81450000000000	24440000000000	93300000000000	23350000000000	222600000000000	35600000000000	87840000000000	19380000000000	65680000000000	58960000000000	16550000000000	8420000000000	10080000000000	26410000000000	34190000000000	24450000000000	20370000000000	1420000000000	10460000000000	705800000000	11500000000	37780000000000	2866000000000	3492000000000	12780000000000	434400000000	81000000000	1397000000000	3994000000000	101000000000	234000000000	2088000000000	193000000000	92000000000	5659000000000	818000000000	280100000000	1088000000000	72500000000	879600000000	35430000000000	13610000000000	10000000000	91700000000	715000000000
2014	598100000000000	444300000000000	761000000000000	64410000000000	81450000000000	24440000000000	93300000000000	23350000000000	222600000000000	35600000000000	87840000000000	19380000000000	65680000000000	58960000000000	16550000000000	8420000000000	10080000000000	26410000000000	34190000000000	24450000000000	20370000000000	1420000000000	10460000000000	705800000000	11500000000	37780000000000	2866000000000	3492000000000	12780000000000	434400000000	81000000000	1397000000000	3994000000000	101000000000	234000000000	2088000000000	193000000000	92000000000	5659000000000	818000000000	280100000000	1088000000000	72500000000	879600000000	35430000000000	13610000000000	10000000000	91700000000	715000000000
2015	598100000000000	444300000000000	761000000000000	64410000000000	81450000000000	24440000000000	93300000000000	23350000000000	222600000000000	35600000000000	87840000000000	19380000000000	65680000000000	58960000000000	16550000000000	8420000000000	10080000000000	26410000000000	34190000000000	24450000000000	20370000000000	1420000000000	10460000000000	705800000000	11500000000	37780000000000	2866000000000	3492000000000	12780000000000	434400000000	81000000000	1397000000000	3994000000000	101000000000	234000000000	2088000000000	193000000000	92000000000	5659000000000	818000000000	280100000000	1088000000000	72500000000	879600000000	35430000000000	13610000000000	10000000000	91700000000	715000000000
2016	598100000000000	444300000000000	761000000000000	64410000000000	81450000000000	24440000000000	93300000000000	23350000000000	222600000000000	35600000000000	87840000000000	19380000000000	65680000000000	58960000000000	16550000000000	8420000000000	10080000000000	26410000000000	34190000000000	24450000000000	20370000000000	1420000000000	10460000000000	705800000000	11500000000	37780000000000	2866000000000	3492000000000	12780000000000	434400000000	81000000000	1397000000000	3994000000000	101000000000	234000000000	2088000000000	193000000000	92000000000	5659000000000	818000000000	280100000000	1088000000000	72500000000	879600000000	35430000000000	13610000000000	10000000000	91700000000	715000000000
Energy use (annual TWh)	China	United States	India	Russian Federation	Japan	Germany	Islamic Republic of Iran	Saudi Arabia	Indonesia	Canada	Mexico	South Africa	Brazil	Turkey	Australia	United Kingdom	Poland	France	Italy	Kazakhstan	Afghanistan	Albania	Algeria	Angola	Antigua and Barbuda	Argentina	Armenia	Austria	Azerbaijan	Bahrain	Barbados	Belarus	Belgium	Belize	Benin	Bolivia	Botswana	Brunei	Bulgaria	Burkina Faso	Burundi	Cameroon	Central African Republic	Chad	Chile	Colombia	Comoros	Congo	Croatia
2000	11792.6	26427.5	3705.99	7176.87	6128.86	3974.28	1430.08	1334.91	1183.68	3557.89	1628.18	1184.21	2233.89	859.066	1313.51	2659.16	1017.05	3069.41	2081.3	372.892	5.777	27.313	299.936	32.352	2.138	686.126	28.876	383.695	131.271	111.972	6.972	255.399	752.165	2.463	6.5	43.332	13.388	19.68	215.73	4.25	1.61	23.338	1.595	1.033	306.696	307.949	0.438	3.551	95.393
2001	12456.1	25804.1	3725.27	7289.17	6069.19	4044.48	1508.81	1422.36	1252.87	3471.46	1608.26	1190.41	2190.05	781.26	1325.59	2688.55	1009.85	3105.78	2092	419.761	4.481	25.18	310.801	35.087	2.138	678.563	28.291	397.99	126.55	115.889	6.976	248.967	746.062	2.55	7.399	36.943	13.926	22.376	224.879	4.662	1.353	23.124	1.644	0.991	308.756	303.001	0.458	4.419	100.239
2002	13568	26177.5	3896.83	7261.41	6051.15	3990.89	1640.41	1481.41	1308.55	3578.26	1660.56	1159.35	2241.73	853.602	1345.27	2628.15	998.974	3075.07	2075.24	429.678	4.262	27.144	321.941	37.433	2.292	646.03	27.086	398.867	124.95	123.652	7.023	256.377	743.006	2.441	8.522	40.424	14.382	26.129	218.52	4.845	1.281	22.974	1.644	0.979	319.559	301.876	0.46	3.924	100.586
2003	15798.7	26259.8	4046.68	7412.26	6027.27	3987.04	1676.18	1569.22	1408.86	3594.08	1674.42	1256.34	2281.38	904.027	1365.55	2665.41	1033.7	3107.19	2143.2	473.279	5.041	32.027	336.876	41.561	2.409	693.085	29.906	404.057	135.163	129.19	7.098	255.231	771.082	2.392	9.882	54.502	14.466	27.032	225.048	5.412	1.016	24.644	1.57	0.967	317.723	312.514	0.589	4.604	105.361
2004	18484.9	26776.9	4341.58	7474.28	6099.33	3983.19	1837.91	1702.47	1401.85	3636.69	1764.63	1371	2392.88	966.679	1410.88	2679.59	1040.43	3132.57	2182.1	501.997	4.669	34.837	349.734	45.975	2.499	730.03	31.267	410.829	153.27	133.824	7.15	287.478	773.696	2.249	10.39	56.587	14.439	30.018	218.059	4.843	1.174	25.787	1.681	1.019	333.892	318.026	0.646	4.875	109.208
2005	21000.5	26788.2	4600.81	7466.05	6207.57	3934.98	1971.12	1814.51	1436.5	3673.99	1877.93	1298.8	2460.56	989.854	1405.45	2708.79	1063.2	3115.3	2184.42	527.233	6.009	34.45	366.175	39.096	2.537	778.556	36.243	417.83	166.163	150.127	7.206	286.451	764.782	2.415	9.701	55.464	15.486	33.816	235.681	5.12	1.001	24.906	1.737	1.097	346.955	318.67	0.621	6.727	108.057
2006	23022.4	26571.8	4836.16	7789.15	6189.14	4031.46	2153.84	1883.86	1457.36	3626.59	1937.36	1324.85	2521.99	1098.15	1490.38	2675.68	1115.59	3089.27	2174.14	557.337	7.286	32.07	379.183	49.367	2.615	818.009	35.848	413.106	163.497	160.18	7.222	304.27	766.387	2.835	13.482	61.102	15.9	52.115	241.401	5.036	1.171	30.127	1.821	1.114	370.482	357.237	0.723	8.122	106.8
2007	25024.4	26943.5	5258.09	7835.92	6126.68	3858.34	2305.34	1965.81	1563.98	3754.24	1947.44	1360.33	2676.28	1168.09	1509.38	2596.37	1112	3034.58	2133.44	620.949	9.407	25.174	399.601	56.799	2.74	854.109	39.991	403.512	147.9	164.451	6.891	297.124	771.037	2.653	16.009	65.676	16.065	54.71	233.842	7.209	1.875	30.144	1.84	1.124	378.516	358.484	0.477	10.06	107.641
2008	25957	26278	5556.9	7871.15	6042.37	3896.74	2394.33	2143.67	1543.78	3739.51	1988.33	1458.48	2794.34	1172.45	1534.27	2549.39	1130.89	3042.99	2103.87	655.002	16.397	28.165	423.509	66.591	2.803	868.655	38.591	411.548	149.336	172.417	8.125	300.628	784.292	2.436	16.315	67.431	16.616	56.19	230.065	7.873	1.208	30.622	1.866	1.131	375.181	387.213	0.487	11.53	106.864
2009	27089.8	24978.9	5978.99	7477.6	5509.3	3653.97	2474.17	2259.36	1599.4	3537.74	1972.54	1454.44	2771.81	1187.77	1521.3	2423.06	1090.17	2873.51	1964.09	592.189	26.808	32.405	448.802	75.871	2.937	851.891	34.446	397.643	131.936	170.352	7.657	285.003	732.741	2.589	17.994	66.521	15.432	37.277	201.899	7.383	1.208	32.963	1.863	1.195	367.422	369.333	0.594	14.096	105.23
2010	28967.8	25825.7	6265.2	7776.15	5869.96	3807.28	2482.03	2476.79	1755.92	3612.92	2030.27	1469.01	3050.36	1250.39	1527.1	2482.84	1161.83	2958.77	2023.48	638.425	33.194	38.863	437.402	81.982	2.84	896.428	39.23	411.111	130.137	172.212	7.38	302.611	780.145	2.998	20.624	67.612	13.781	42.46	209.956	7.832	1.395	37.668	1.911	1.296	369.031	395.314	0.705	19.527	106.685
2011	31261.4	25580.1	6633.46	8032.12	5572.72	3667.27	2593.75	2556.74	1916.29	3779.21	2127.79	1448.54	3189.64	1336.19	1582.24	2347.2	1167.54	2844.2	1976.46	703.145	44.997	28.64	464.422	86.456	2.832	913.633	41.663	384.976	144.775	170.445	7.745	300.907	727.14	2.516	19.134	67.273	13.783	43.615	223.349	8.866	1.543	39.725	2.015	1.363	401.205	413.383	0.634	23.777	93.546
2012	32512.6	24913.3	6975.95	8050.1	5534.11	3713.57	2614.01	2710.51	2019.01	3741.25	2140.43	1426.64	3246.74	1418.39	1562.97	2376	1131.98	2840.25	1922.61	728.72	40.273	29.163	507.603	96.665	2.91	939.687	44.799	403.804	149.158	183.382	7.28	325.142	698.814	2.59	18.028	83.281	13.334	42.398	212.245	10.529	1.449	36.618	2.091	1.367	410.131	442.367	0.659	24.449	86.679
2013	33715.2	25582.1	7243.6	7946.53	5485.28	3818.32	2736.57	2721.69	2102.84	3856.06	2149.53	1431.76	3369.58	1407.45	1574.72	2364.44	1135.2	2864.64	1831.61	737.715	32.809	37.024	536.956	102.287	2.911	979.05	43.496	401.179	153.358	204.089	7.393	286.736	716.79	2.915	18.414	84.723	16.402	39.432	196.262	12.708	1.632	33.515	2.093	1.379	414.198	448.483	0.786	30.878	94.481
2014	34499.5	25848.4	7739.36	7974.23	5344.64	3657.3	2855.67	2917.37	1969.88	3897.77	2138.11	1449.94	3444.85	1453.27	1597.4	2227.92	1092.95	2741.93	1730.78	748.614	29.678	31.828	585.572	109.605	2.976	974.129	44.238	384.488	156.403	199.193	6.43	296.036	667.923	2.846	19.677	85.651	17.686	44.347	208.86	11.842	1.418	43.629	2.117	1.379	406.242	472.832	0.702	29.425	94.301
2015	34826.9	25597	7991.9	7816.77	5268.91	3722.19	2838.55	3009.49	1973.02	3887.13	2135.64	1401.58	3398.18	1589.79	1621.39	2252.94	1104.38	2756.51	1769.08	739.358	32.917	33.685	617.482	113.28	3.046	996.057	40.5	385.086	170.999	204.197	6.842	269	677.511	3.13	21.99	83.531	21.166	48.278	222.28	14.376	1.509	46.534	2.118	1.397	415.351	475.565	0.758	29.272	89.664
2016	35264.1	25560.5	8352.07	7988.78	5179.95	3783.26	2998.02	3049.11	2027.66	3871.3	2162.62	1471.59	3310.7	1669.65	1634.11	2226.11	1153	2711.57	1786.27	751.101	35.737	39.446	616.819	104.001	3.067	993.388	42.077	397.826	169.349	202.719	7.181	267.562	729.817	3.088	23.142	90.937	21.059	52.006	210.449	14.228	1.703	47.926	2.176	1.432	435.776	501.923	0.794	28.187	93.153
Energy Use in MJ 2000 (*3600000000)	China	United States	India	Russian Federation	Japan	Germany	Islamic Republic of Iran	Saudi Arabia	Indonesia	Canada	Mexico	South Africa	Brazil	Turkey	Australia	United Kingdom	Poland	France	Italy	Kazakhstan	Afghanistan	Albania	Algeria	Angola	Antigua and Barbuda	Argentina	Armenia	Austria	Azerbaijan	Bahrain	Barbados	Belarus	Belgium	Belize	Benin	Bolivia	Botswana	Brunei	Bulgaria	Burkina Faso	Burundi	Cameroon	Central African Republic	Chad	Chile	Colombia	Comoros	Congo	Croatia
2000	42453194400000	95138866800000	13341567600000	25836732000000	22063910400000	14307422400000	5148298800000	4805661600000	4261255200000	12808393200000	5861448000000	4263156000000	8042018400000	3092637600000	4728625200000	9572994000000	3661398000000	11049872400000	7492698000000	1342411200000	20797200000	98326800000	1079769600000	116467200000	7696800000	2470053600000	103953600000	1381302000000	472575600000	403099200000	25099200000	919436400000	2707794000000	8866800000	23400000000	155995200000	48196800000	70848000000	776628000000	15300000000	5796000000	84016800000	5742000000	3718800000	1104105600000	1108616400000	1576800000	12783600000	343414800000
2001	44842014000000	92894598000000	13410968400000	26241004800000	21849087600000	14560124400000	5431708800000	5120492400000	4510339200000	12497256000000	5789728800000	4285476000000	7884198000000	2812536000000	4772131200000	9678798000000	3635456400000	11180800800000	7531203600000	1511139600000	16131600000	90648000000	1118883600000	126313200000	7696800000	2442826800000	101847600000	1432764000000	455580000000	417200400000	25113600000	896281200000	2685823200000	9180000000	26636400000	132994800000	50133600000	80553600000	809564400000	16783200000	4870800000	83246400000	5918400000	3567600000	1111521600000	1090803600000	1648800000	15908400000	360860400000
2002	48844645200000	94239093600000	14028580800000	26141072400000	21784143600000	14367200400000	5905476000000	5333072400000	4710794400000	12881725200000	5978012400000	4173660000000	8070213600000	3072967200000	4842979200000	9461336400000	3596306400000	11070252000000	7470853200000	1546840800000	15343200000	97718400000	1158987600000	134758800000	8251200000	2325708000000	97509600000	1435921200000	449820000000	445147200000	25282800000	922957200000	2674821600000	8787600000	30679200000	145526400000	51775200000	94064400000	786672000000	17442000000	4611600000	82706400000	5918400000	3524400000	1150412400000	1086753600000	1656000000	14126400000	362109600000
2003	56875266000000	94535107200000	14568033600000	26684146800000	21698175600000	14353351200000	6034251600000	5649181200000	5071896000000	12938702400000	6027922800000	4522806000000	8212971600000	3254497200000	4915962000000	9595458000000	3721309200000	11185873200000	7715530800000	1703804400000	18147600000	115297200000	1212753600000	149619600000	8672400000	2495106000000	107661600000	1454605200000	486586800000	465084000000	25552800000	918831600000	2775895200000	8611200000	35575200000	196207200000	52077600000	97315200000	810172800000	19483200000	3657600000	88718400000	5652000000	3481200000	1143802800000	1125050400000	2120400000	16574400000	379299600000
2004	66545769600000	96396789600000	15629673600000	26907397200000	21957584400000	14339480400000	6616468800000	6128906400000	5046649200000	13092098400000	6352668000000	4935607200000	8614368000000	3480044400000	5079171600000	9646538400000	3745537200000	11277248400000	7855567200000	1807189200000	16808400000	125413200000	1259042400000	165510000000	8996400000	2628108000000	112561200000	1478984400000	551772000000	481766400000	25740000000	1034920800000	2785305600000	8096400000	37404000000	203713200000	51980400000	108064800000	785012400000	17434800000	4226400000	92833200000	6051600000	3668400000	1202011200000	1144893600000	2325600000	17550000000	393148800000
2005	75601782000000	96437390400000	16562923200000	26877794400000	22347244800000	14165928000000	7096014000000	6532239600000	5171389200000	13226353200000	6760533600000	4675672800000	8858012400000	3563474400000	5059609200000	9751658400000	3827534400000	11215087200000	7863901200000	1898038800000	21632400000	124020000000	1318230000000	140745600000	9133200000	2802801600000	130474800000	1504188000000	598186800000	540457200000	25941600000	1031223600000	2753215200000	8694000000	34923600000	199670400000	55749600000	121737600000	848451600000	18432000000	3603600000	89661600000	6253200000	3949200000	1249038000000	1147212000000	2235600000	24217200000	389005200000
2006	82880600400000	95658440400000	17410186800000	28040958000000	22280900400000	14513241600000	7753820400000	6781888800000	5246499600000	13055706000000	6974481600000	4769452800000	9079160400000	3953325600000	5365382400000	9632462400000	4016113200000	11121357600000	7826904000000	2006413200000	26229600000	115452000000	1365058800000	177721200000	9414000000	2944832400000	129052800000	1487181600000	588589200000	576648000000	25999200000	1095372000000	2758993200000	10206000000	48535200000	219967200000	57240000000	187614000000	869043600000	18129600000	4215600000	108457200000	6555600000	4010400000	1333735200000	1286053200000	2602800000	29239200000	384480000000
2007	90087890400000	96996535200000	18929124000000	28209308400000	22056037200000	13890031200000	8299227600000	7076908800000	5630335200000	13515249600000	7010776800000	4897170000000	9634615200000	4205134800000	5433760800000	9346928400000	4003203600000	10924498800000	7680387600000	2235416400000	33865200000	90626400000	1438563600000	204476400000	9864000000	3074792400000	143967600000	1452643200000	532440000000	592023600000	24807600000	1069646400000	2775733200000	9550800000	57632400000	236433600000	57834000000	196956000000	841831200000	25952400000	6750000000	108518400000	6624000000	4046400000	1362657600000	1290542400000	1717200000	36216000000	387507600000
2008	93445045200000	94600785600000	20004832800000	28336132800000	21752521200000	14028267600000	8619591600000	7717215600000	5557597200000	13462218000000	7157991600000	5250531600000	10059624000000	4220827200000	5523357600000	9177800400000	4071196800000	10954756800000	7573924800000	2358007200000	59029200000	101394000000	1524632400000	239727600000	10090800000	3127158000000	138927600000	1481572800000	537609600000	620701200000	29250000000	1082260800000	2823451200000	8769600000	58734000000	242751600000	59817600000	202284000000	828234000000	28342800000	4348800000	110239200000	6717600000	4071600000	1350651600000	1393966800000	1753200000	41508000000	384710400000
2009	97523226000000	89924090400000	21524364000000	26919363600000	19833469200000	13154306400000	8906997600000	8133696000000	5757829200000	12735867600000	7101151200000	5235987600000	9978526800000	4275957600000	5476687200000	8723012400000	3924615600000	10344618000000	7070734800000	2131880400000	96508800000	116658000000	1615687200000	273135600000	10573200000	3066807600000	124005600000	1431514800000	474969600000	613267200000	27565200000	1026010800000	2637867600000	9320400000	64778400000	239475600000	55555200000	134197200000	726836400000	26578800000	4348800000	118666800000	6706800000	4302000000	1322719200000	1329598800000	2138400000	50745600000	378828000000
2010	104284087200000	92972664000000	22554727200000	27994158000000	21131870400000	13706200800000	8935293600000	8916440400000	6321330000000	13006512000000	7308957600000	5288443200000	10981278000000	4501389600000	5497570800000	8938234800000	4182580800000	10651575600000	7284546000000	2298330000000	119498400000	139906800000	1574647200000	295135200000	10224000000	3227140800000	141228000000	1479999600000	468493200000	619963200000	26568000000	1089399600000	2808522000000	10792800000	74246400000	243403200000	49611600000	152856000000	755841600000	28195200000	5022000000	135604800000	6879600000	4665600000	1328511600000	1423130400000	2538000000	70297200000	384066000000
2011	112540899600000	92088435600000	23880470400000	28915650000000	20061802800000	13202172000000	9337503600000	9204264000000	6898633200000	13605156000000	7660047600000	5214740400000	11482714800000	4810276800000	5696071200000	8449909200000	4203158400000	10239102000000	7115252400000	2531322000000	161989200000	103104000000	1671919200000	311241600000	10195200000	3289078800000	149986800000	1385913600000	521190000000	613602000000	27882000000	1083265200000	2617704000000	9057600000	68882400000	242182800000	49618800000	157014000000	804056400000	31917600000	5554800000	143010000000	7254000000	4906800000	1444338000000	1488178800000	2282400000	85597200000	336765600000
2012	117045442800000	89687836800000	25113434400000	28980378000000	19922788800000	13368862800000	9410436000000	9757843200000	7268446800000	13468485600000	7705566000000	5135914800000	11688271200000	5106211200000	5626710000000	8553614400000	4075135200000	10224910800000	6921385200000	2623392000000	144982800000	104986800000	1827370800000	347994000000	10476000000	3382873200000	161276400000	1453694400000	536968800000	660175200000	26208000000	1170511200000	2515730400000	9324000000	64900800000	299811600000	48002400000	152632800000	764082000000	37904400000	5216400000	131824800000	7527600000	4921200000	1476471600000	1592521200000	2372400000	88016400000	312044400000
2013	121374752400000	92095552800000	26076967200000	28607508000000	19746997200000	13745970000000	9851641200000	9798098400000	7570227600000	13881801600000	7738315200000	5154339600000	12130491600000	5066834400000	5668977600000	8511991200000	4086720000000	10312718400000	6593799600000	2655774000000	118112400000	133286400000	1933041600000	368233200000	10479600000	3524580000000	156585600000	1444244400000	552088800000	734720400000	26614800000	1032249600000	2580444000000	10494000000	66290400000	305002800000	59047200000	141955200000	706543200000	45748800000	5875200000	120654000000	7534800000	4964400000	1491112800000	1614538800000	2829600000	111160800000	340131600000
2014	124198030800000	93054243600000	27861696000000	28707246000000	19240689600000	13166290800000	10280415600000	10502528400000	7091582400000	14031975600000	7697188800000	5219791200000	12401474400000	5231761200000	5750632800000	8020501200000	3934627200000	9870940800000	6230793600000	2695010400000	106840800000	114580800000	2108059200000	394578000000	10713600000	3506864400000	159256800000	1384156800000	563050800000	717094800000	23148000000	1065729600000	2404522800000	10245600000	70837200000	308343600000	63669600000	159649200000	751896000000	42631200000	5104800000	157064400000	7621200000	4964400000	1462471200000	1702195200000	2527200000	105930000000	339483600000
2015	125376991200000	92149077600000	28770840000000	28140368400000	18968094000000	13399869600000	10218769200000	10834146000000	7102879200000	13993660800000	7688307600000	5045670000000	12233430000000	5723229600000	5836989600000	8110587600000	3975771600000	9923436000000	6368691600000	2661688800000	118501200000	121266000000	2222935200000	407808000000	10965600000	3585805200000	145800000000	1386309600000	615596400000	735109200000	24631200000	968400000000	2439039600000	11268000000	79164000000	300711600000	76197600000	173800800000	800208000000	51753600000	5432400000	167522400000	7624800000	5029200000	1495263600000	1712034000000	2728800000	105379200000	322790400000
2016	126950839200000	92017872000000	30067452000000	28759604400000	18647830800000	13619732400000	10792875600000	10976803200000	7299594000000	13936690800000	7785424800000	5297724000000	11918530800000	6010750800000	5882778000000	8013996000000	4150789200000	9761666400000	6430582800000	2703963600000	128653200000	142005600000	2220548400000	374403600000	11041200000	3576196800000	151477200000	1432173600000	609656400000	729788400000	25851600000	963223200000	2627341200000	11116800000	83311200000	327373200000	75812400000	187221600000	757616400000	51220800000	6130800000	172533600000	7833600000	5155200000	1568793600000	1806922800000	2858400000	101473200000	335350800000
Arable land are (1000 ha)	China	United States	India	Russian Federation	Japan	Germany	Islamic Republic of Iran	Saudi Arabia	Indonesia	Canada	Mexico	South Africa	Brazil	Turkey	Australia	United Kingdom	Poland	France	Italy	Kazakhstan	Afghanistan	Albania	Algeria	Angola	Antigua and Barbuda	Argentina	Armenia	Austria	Azerbaijan	Bahrain	Barbados	Belarus	Belgium	Belize	Benin	Bolivia	Botswana	Brunei	Bulgaria	Burkina Faso	Burundi	Cameroon	Central African Republic	Chad	Chile	Colombia	Comoros	Congo	Croatia
2000	119666	175368	160930	124374	4474	11804	14924	3592	20500	40971	22905	13812	45448	23826	23473	5876	13993	18354.4	8479	30159.3	7683	578	7662	3000	4	27640	450	1399	1825.6	2	15	6133	862	64	2380	3144	350	2	3526	3700	960	5960	1930	3600	1750	2818	65	490	842
2001	120258	175400	160325	123860	4444	11813	15861	3600	20200	40948	23151	13685	46025	23801	24200	5651	13584	18345.9	8339	29359.7	7683	578	7583	3000	4	27746	455	1387	1835.7	2	15	5761	845	65	2450	3150	200	2	3467	4500	975	5960	1930	3900	1750	2434	65	490	853
2002	120650	172977	160432	123465	4419	11791	16029	3600	20081	40615	23184	13700	46602	23994	23735	5786	13010	18371.5	8287	28345.9	7678	578	7547	3100	4	27862	455	1385	1837.3	2	14	5616	832	70	2550	3300	245	2	3355	4700	986	5960	1930	3700	1650	2211	65	490	858
2003	120836	170731	159799	122559	4397	11827	16197	3600	22406	40282	23652	13600	47179	23372	23240	5659	12587	18354.8	7959	28343.6	7772	578	7503.7	3300	4	28683.5	455	1380.03	1838.5	1.7	14	5569	835	70	2650	3514	195	2	3323	5100	990	5960	1910	3800	1500	2264	65	490	864
2004	121021	168516	159681	122146	4379	11898	16365	3500	24666	39949	23214	13300	47756	23871	25743	5819	12610	18368	7979	28478.8	7816	578	7493	3300	4	30775	455	1379.3	1840.7	1.5	13	5548	840	70	2650	3579	226	2	3313	4600	985	5960	1930	3800	1500	2238	65	490	847
2005	121267	166271	159444	121781	4360	11904	16533	3500	22946	39616	23296	13175	48333	23830	26402	5729	12141	18377.6	7780	28562.3	7805	538	7511	3300	4	32897.5	455	1380.7	1843.2	1.5	13	5542	843	70	2654	3806	240	2	3173	4900	956	5963	1930	3900	1450	2026	65	490	873
2006	121607	164025	158662	121574	4343	11866	16701	3450	21500	39283	23363	12600	48914	22981	24228	6094	12368	18339	7376	28616	7794	584	7470	3300	4	34854	452.9	1377.2	1841.3	1.45	13	5540	842	70	2500	3905	201	2	3132	4700	900	5963	1930	3900	1350	1904.6	65	490	881
2007	121547	161780	158022	121574	4326	11877	16869	3446	22000	38884	23519	12600	49537	21979	23125	6085	11823	18286.2	7171	28641.2	7794	578	7469	3400	4	36433	452.1	1376	1854	1.4	13	5519	839	70	2500	4171	182	3	3085	4900	850	5963	1930	3900	1262	1998	65	490	852
2008	121792	160426	157995	121649	4308	11932	15545	3339	22700	38485	22945	12800	50159	21555	23994.1	6005	12043	18268.7	7498	28519.8	7794	610	7489	3400	4	35261	450.4	1369	1860.2	1.2	13	5516	844	70	2500	4266	279	3	3088	6000	900	5963	1930	3900	1312	1830	65	490	860.7
2009	121984	159071	157924	121649	4294	11945	15566	3196	23600	38086	22200	12660	50782	21351	27141.6	6049	12066	18256.2	6981	28618.2	7793	609	7493	4000	4	34292	449.4	1366.6	1874	1.36	13	5544	840	73	2500	4454	316	4	3146	5700	950	5963	1950	4000	1310	1775	65	500	868.3
2010	121370	157716	157009	121649	4282	11846	15390	3180	23600	37687	21527	12533	51405	21384	25450.2	5970	10829	18300.7	7042	28683.8	7793	626	7502	4100	4	37981	448.5	1363.8	1884.1	1.6	12	5535	834	75	2500	4297	259	4	3186	6000	950	6200	1800	4200	1271	1763	65	510	904.4
2011	120640	156362	156979	121649	4254	11875	15214	3159	23500	37285	21209	12033	52027	20539	31694.9	6062	11098	18274.4	6720	29180.6	7791	622	7502	4700	4	38781	449.2	1359.6	1885.7	1.6	11	5529	825	75	2500	4338	324	4	3250	5700	1000	6200	1800	4300	1317	1586	65	530	896.7
2012	119960	155008	156546	121649	4246	11834	15038	3117	23500	37534	20106	12000	52650	20577	31637.4	6212	10925	18281.7	7118	29332.5	7790	619.1	7506.5	4700	4	39754	448.4	1355.1	1896.8	1.6	10	5522	803	78	2600	4422	285	4	3317	6000	1100	6200	1800	4650	1283	1578	65	530	906.4
2013	119762	155553	156442	121649	4238	11876	14687	3068	23500	37783	19705	12000	53272	20574	31220.8	6265.4	10792	18305.7	6827	29394.7	7785	617.1	7496.2	4900	4	39699	448.2	1353.9	1925.3	1.6	9.5	5559.7	816	78	2700	4506	280	5	3479	6200	1200	6200	1800	5000	1309	1682	65	550	876.4
2014	119655	156099	156463	121649	4222	11869	14687	3430	23500	38032	19117	12000	53895	20699	31960.3	6233.5	10928	18333.1	6728	29470.2	7771	615.6	7469.4	4900	4	39200	447.5	1351.7	1926.5	1.6	9	5662.1	817	78	2700	4469	402	5	3486	6000	1200	6200	1800	5200	1289.2	1706.7	65	550	812.9
2015	119593	156645	156416	121649	4205	11846	14687	3490	23800	38282	20611	12000	54518	20650	31090.7	6011	10887	18478.7	6601	29601.1	7765	615.1	7462.1	4900	4	39200	446.7	1346.1	1937.7	1.6	8	5677.4	829.5	88	2700	4416	259.6	5	3509.7	6000	1200	6200	1800	5200	1313	1731.5	65	550	843.7
2016	119513	157191	156416	121649	4184	11762	14687	3477	25200	38530	22167	12000	55140	20382	30057	6026.01	10806	18355.9	6697	29642.2	7729	620.3	7404.2	4900	4	39200	446.4	1344.49	1999	1.6	7	5683.8	849.4	88	2800	4438	259.6	5	3496	6000	1200	6200	1800	5200	1269.8	1756.2	65	550	874
Arable Land Area 1000 Hectares (converted to m2)	China	United States	India	Russian Federation	Japan	Germany	Islamic Republic of Iran	Saudi Arabia	Indonesia	Canada	Mexico	South Africa	Brazil	Turkey	Australia	United Kingdom	Poland	France	Italy	Kazakhstan	Afghanistan	Albania	Algeria	Angola	Antigua and Barbuda	Argentina	Armenia	Austria	Azerbaijan	Bahrain	Barbados	Belarus	Belgium	Belize	Benin	Bolivia	Botswana	Brunei	Bulgaria	Burkina Faso	Burundi	Cameroon	Central African Republic	Chad	Chile	Colombia	Comoros	Congo	Croatia
2000	1196660000000	1753680000000	1609300000000	1243740000000	44740000000	118040000000	149240000000	35920000000	205000000000	409710000000	229050000000	138120000000	454480000000	238260000000	234730000000	58760000000	139930000000	183544000000	84790000000	301593000000	76830000000	5780000000	76620000000	30000000000	40000000	276400000000	4500000000	13990000000	18256000000	20000000	150000000	61330000000	8620000000	640000000	23800000000	31440000000	3500000000	20000000	35260000000	37000000000	9600000000	59600000000	19300000000	36000000000	17500000000	28180000000	650000000	4900000000	8420000000
2001	1202578444000	1754000000000	1603250000000	1238600000000	44440000000	118130000000	158610000000	36000000000	202000000000	409480000000	231510000000	136850000000	460250000000	238010000000	242000000000	56510000000	135840000000	183459000000	83390000000	293597000000	76830000000	5780000000	75830000000	30000000000	40000000	277460000000	4550000000	13870000000	18357000000	20000000	150000000	57610000000	8450000000	650000000	24500000000	31500000000	2000000000	20000000	34670000000	45000000000	9750000000	59600000000	19300000000	39000000000	17500000000	24340000000	650000000	4900000000	8530000000
2002	1206496889000	1729770000000	1604320000000	1234650000000	44190000000	117910000000	160290000000	36000000000	200810000000	406150000000	231840000000	137000000000	466020000000	239940000000	237350000000	57860000000	130100000000	183715000000	82870000000	283459000000	76780000000	5780000000	75470000000	31000000000	40000000	278620000000	4550000000	13850000000	18373000000	20000000	140000000	56160000000	8320000000	700000000	25500000000	33000000000	2450000000	20000000	33550000000	47000000000	9860000000	59600000000	19300000000	37000000000	16500000000	22110000000	650000000	4900000000	8580000000
2003	1208355333000	1707313000000	1597990000000	1225590000000	43970000000	118270000000	161970000000	36000000000	224060000000	402820000000	236520000000	136000000000	471790000000	233720000000	232400000000	56590000000	125870000000	183548000000	79590000000	283436000000	77720000000	5780000000	75037000000	33000000000	40000000	286835000000	4550000000	13800300000	18385000000	17000000	140000000	55690000000	8350000000	700000000	26500000000	35140000000	1950000000	20000000	33230000000	51000000000	9900000000	59600000000	19100000000	38000000000	15000000000	22640000000	650000000	4900000000	8640000000
2004	1210213778000	1685159000000	1596810000000	1221460000000	43790000000	118980000000	163650000000	35000000000	246660000000	399490000000	232140000000	133000000000	477560000000	238710000000	257430000000	58190000000	126100000000	183680000000	79790000000	284788000000	78160000000	5780000000	74930000000	33000000000	40000000	307750000000	4550000000	13793000000	18407000000	15000000	130000000	55480000000	8400000000	700000000	26500000000	35790000000	2260000000	20000000	33130000000	46000000000	9850000000	59600000000	19300000000	38000000000	15000000000	22380000000	650000000	4900000000	8470000000
2005	1212672222000	1662706000000	1594440000000	1217810000000	43600000000	119040000000	165330000000	35000000000	229460000000	396160000000	232960000000	131750000000	483330000000	238300000000	264020000000	57290000000	121410000000	183776000000	77800000000	285623000000	78050000000	5380000000	75110000000	33000000000	40000000	328975000000	4550000000	13807000000	18432000000	15000000	130000000	55420000000	8430000000	700000000	26540000000	38060000000	2400000000	20000000	31730000000	49000000000	9560000000	59630000000	19300000000	39000000000	14500000000	20260000000	650000000	4900000000	8730000000
2006	1216070667000	1640253000000	1586620000000	1215740000000	43430000000	118660000000	167010000000	34500000000	215000000000	392830000000	233630000000	126000000000	489140000000	229810000000	242280000000	60940000000	123680000000	183390000000	73760000000	286160000000	77940000000	5840000000	74700000000	33000000000	40000000	348540000000	4529000000	13772000000	18413000000	14500000	130000000	55400000000	8420000000	700000000	25000000000	39050000000	2010000000	20000000	31320000000	47000000000	9000000000	59630000000	19300000000	39000000000	13500000000	19046000000	650000000	4900000000	8810000000
2007	1215469111000	1617800000000	1580220000000	1215740000000	43260000000	118770000000	168690000000	34460000000	220000000000	388840000000	235190000000	126000000000	495370000000	219790000000	231250000000	60850000000	118230000000	182862000000	71710000000	286412000000	77940000000	5780000000	74690000000	34000000000	40000000	364330000000	4521000000	13760000000	18540000000	14000000	130000000	55190000000	8390000000	700000000	25000000000	41710000000	1820000000	30000000	30850000000	49000000000	8500000000	59630000000	19300000000	39000000000	12620000000	19980000000	650000000	4900000000	8520000000
2008	1217917556000	1604255000000	1579950000000	1216490000000	43080000000	119320000000	155450000000	33390000000	227000000000	384850000000	229450000000	128000000000	501590000000	215550000000	239941000000	60050000000	120430000000	182687000000	74980000000	285198000000	77940000000	6100000000	74890000000	34000000000	40000000	352610000000	4504000000	13690000000	18602000000	12000000	130000000	55160000000	8440000000	700000000	25000000000	42660000000	2790000000	30000000	30880000000	60000000000	9000000000	59630000000	19300000000	39000000000	13120000000	18300000000	650000000	4900000000	8607000000
2009	1219836000000	1590710000000	1579240000000	1216490000000	42940000000	119450000000	155660000000	31960000000	236000000000	380860000000	222000000000	126600000000	507820000000	213510000000	271416000000	60490000000	120660000000	182562000000	69810000000	286182000000	77930000000	6090000000	74930000000	40000000000	40000000	342920000000	4494000000	13666000000	18740000000	13600000	130000000	55440000000	8400000000	730000000	25000000000	44540000000	3160000000	40000000	31460000000	57000000000	9500000000	59630000000	19500000000	40000000000	13100000000	17750000000	650000000	5000000000	8683000000
2010	1213698000000	1577165000000	1570090000000	1216490000000	42820000000	118460000000	153900000000	31800000000	236000000000	376870000000	215270000000	125330000000	514050000000	213840000000	254502000000	59700000000	108290000000	183007000000	70420000000	286838000000	77930000000	6260000000	75020000000	41000000000	40000000	379810000000	4485000000	13638000000	18841000000	16000000	120000000	55350000000	8340000000	750000000	25000000000	42970000000	2590000000	40000000	31860000000	60000000000	9500000000	62000000000	18000000000	42000000000	12710000000	17630000000	650000000	5100000000	9044000000
2011	1206401000000	1563620000000	1569790000000	1216490000000	42540000000	118750000000	152140000000	31590000000	235000000000	372850000000	212090000000	120330000000	520270000000	205390000000	316949000000	60620000000	110980000000	182744000000	67200000000	291806000000	77910000000	6220000000	75020000000	47000000000	40000000	387810000000	4492000000	13596000000	18857000000	16000000	110000000	55290000000	8250000000	750000000	25000000000	43380000000	3240000000	40000000	32500000000	57000000000	10000000000	62000000000	18000000000	43000000000	13170000000	15860000000	650000000	5300000000	8967000000
2012	1199595000000	1550075000000	1565460000000	1216490000000	42460000000	118340000000	150380000000	31170000000	235000000000	375340000000	201060000000	120000000000	526500000000	205770000000	316374000000	62120000000	109250000000	182817000000	71180000000	293325000000	77900000000	6191000000	75065000000	47000000000	40000000	397540000000	4484000000	13551000000	18968000000	16000000	100000000	55220000000	8030000000	780000000	26000000000	44220000000	2850000000	40000000	33170000000	60000000000	11000000000	62000000000	18000000000	46500000000	12830000000	15780000000	650000000	5300000000	9064000000
2013	1197615000000	1555534000000	1564420000000	1216490000000	42380000000	118760000000	146870000000	30680000000	235000000000	377830000000	197050000000	120000000000	532720000000	205740000000	312208000000	62654000000	107920000000	183057000000	68270000000	293947000000	77850000000	6171000000	74962000000	49000000000	40000000	396990000000	4482000000	13539000000	19253000000	16000000	95000000	55597000000	8160000000	780000000	27000000000	45060000000	2800000000	50000000	34790000000	62000000000	12000000000	62000000000	18000000000	50000000000	13090000000	16820000000	650000000	5500000000	8764000000
2014	1196550000000	1560993000000	1564630000000	1216490000000	42220000000	118690000000	146870000000	34300000000	235000000000	380320000000	191170000000	120000000000	538950000000	206990000000	319603000000	62335000000	109280000000	183331000000	67280000000	294702000000	77710000000	6156000000	74694000000	49000000000	40000000	392000000000	4475000000	13517000000	19265000000	16000000	90000000	56621000000	8170000000	780000000	27000000000	44690000000	4020000000	50000000	34860000000	60000000000	12000000000	62000000000	18000000000	52000000000	12892000000	17067000000	650000000	5500000000	8129000000
2015	1195934000000	1566451000000	1564160000000	1216490000000	42050000000	118460000000	146870000000	34900000000	238000000000	382820000000	206110000000	120000000000	545180000000	206500000000	310907000000	60110000000	108870000000	184787000000	66010000000	296011000000	77650000000	6151000000	74621000000	49000000000	40000000	392000000000	4467000000	13461000000	19377000000	16000000	80000000	56774000000	8295000000	880000000	27000000000	44160000000	2596000000	50000000	35097000000	60000000000	12000000000	62000000000	18000000000	52000000000	13130000000	17315000000	650000000	5500000000	8437000000
2016	1195129000000	1571910000000	1564160000000	1216490000000	41840000000	117620000000	146870000000	34770000000	252000000000	385300000000	221670000000	120000000000	551400000000	203820000000	300570000000	60260105000	108060000000	183559160000	66970000000	296422000000	77290000000	6203000000	74042000000	49000000000	40000000	392000000000	4464000000	13444900000	19990000000	16000000	70000000	56838000000	8494000000	880000000	28000000000	44380000000	2596000000	50000000	34960000000	60000000000	12000000000	62000000000	18000000000	52000000000	12698000000	17562000000	650000000	5500000000	8740000000
Population	China	United States	India	Russian Federation	Japan	Germany	Islamic Republic of Iran	Saudi Arabia	Indonesia	Canada	Mexico	South Africa	Brazil	Turkey	Australia	United Kingdom	Poland	France	Italy	Kazakhstan	Afghanistan	Albania	Algeria	Angola	Antigua and Barbuda	Argentina	Armenia	Austria	Azerbaijan	Bahrain	Barbados	Belarus	Belgium	Belize	Benin	Bolivia	Botswana	Brunei	Bulgaria	Burkina Faso	Burundi	Cameroon	Central African Republic	Chad	Chile	Colombia	Comoros	Congo	Croatia
2000	1262645000	282162411	1056575549	146596869	126843000	82211508	65623405	20663843	211513823	30685730	98899845	44967708	174790340	63240194	19153000	58892514	38258629	60912500	56942108	14883626	20779953	3089027	31042235	16395473	76016	36870787	3069591	8011566	8048600	664611	271515	9979610	10251250	247315	6865951	8418264	1643334	333165	8170172	11607942	6378871	15513945	3640427	8355654	15342353	39629965	542357	3127411	4468302
2001	1271850000	284968955	1075000085	145976482	127149000	82349925	66449112	21202642	214427417	31020902	100298153	45571274	177196054	64192243	19413000	59119673	38248076	61357430	56974100	14858335	21606988	3060173	31451514	16945753	77212	37275652	3050687	8042293	8111200	697545	272500	9928549	10286570	255063	7076733	8580235	1674678	340034	8009142	11944587	6525545	15928910	3722018	8678051	15516113	40255956	555888	3217933	4299642
2002	1280400000	287625193	1093317189	145306497	127445000	82488495	67284796	21805313	217357793	31360079	101684758	46150913	179537520	65145367	19651400	59370479	38230364	61805267	57059007	14858948	22600770	3051010	31855109	17519417	78295	37681749	3033978	8081957	8171950	735146	273425	9865548	10332785	262378	7295394	8742814	1704642	346782	7837161	12293100	6704113	16357602	3802128	9019233	15684409	40875363	569479	3310387	4302174
2003	1288400000	290107933	1111523144	144648618	127718000	82534176	68122938	22456649	220309469	31644028	103081020	46719196	181809246	66089402	19895400	59647577	38204570	62244886	57313203	14909018	23680871	3039616	32264157	18121479	79300	38087868	3017932	8121423	8234100	778708	274329	9796749	10376133	269425	7520555	8905823	1734398	353293	7775327	12654621	6909154	16800865	3881181	9373916	15849652	41483872	583211	3406922	4303399
2004	1296075000	292805298	1129623456	144067316	127761000	82516260	68951281	23132682	223285676	31940655	104514932	47291610	184006481	67010930	20127400	59987905	38182222	62704895	57685327	15012985	24726684	3026939	32692163	18758145	80336	38491972	3000720	8171966	8306500	829844	275284	9730146	10421137	276504	7750004	9069039	1765527	359433	7716860	13030569	7131693	17259322	3959875	9734767	16014971	42075953	597228	3510468	4304600
2005	1303720000	295516599	1147609927	143518814	127773000	82469422	69762347	23816183	226289470	32243753	106005203	47880601	186127103	67903469	20394800	60401206	38165445	63179351	57969484	15147029	25654277	3011487	33149724	19433602	81465	38892931	2981269	8227829	8391850	889164	276323	9663915	10478617	283800	7982225	9232306	1799078	365114	7658972	13421930	7364862	17733410	4038382	10096633	16182721	42647731	611627	3622775	4310145
2006	1311020000	298379912	1165486291	143049637	127854000	82376451	70554760	24498310	229318262	32571174	107560153	48489459	188167356	68756810	20697900	60846820	38141267	63621381	58143979	15308084	26433049	2992547	33641002	20149901	82704	39289878	2958307	8268641	8484550	958418	277477	9604924	10547958	291329	8216897	9395446	1835908	370263	7601022	13829176	7607849	18223674	4118069	10457124	16354504	43200901	626425	3745141	4311159
2007	1317885000	301231207	1183209472	142805114	128001000	82266372	71336475	25184597	232374245	32889025	109170502	49119759	190130443	69581848	20827600	61322463	38120560	64016225	58438310	15484192	27100536	2970017	34166972	20905363	84026	39684295	2932618	8295487	8581300	1035919	278700	9560953	10625700	299025	8454793	9558439	1875459	374965	7545338	14252021	7862214	18730282	4198010	10818024	16530195	43737512	641620	3876119	4310217
2008	1324655000	304093966	1200669765	142742366	128063000	82110097	72120604	25888541	235469762	33247118	110815271	49779471	192030362	70418604	21249200	61806995	38125759	64374984	58826731	15674000	27722276	2947314	34730608	21695634	85397	40080160	2907618	8321496	8763400	1114641	279946	9527985	10709973	306823	8696921	9721454	1915639	379421	7492561	14689725	8126102	19252666	4273366	11183588	16708258	44254972	657229	4011486	4309705
2009	1331260000	306771529	1217726215	142785349	128047000	81902307	72924837	26630303	238620563	33628895	112463887	50477011	193886508	71321399	21691700	62276270	38151603	64707040	59095365	16092822	28394813	2927519	35333881	22514281	86746	40482788	2888092	8343323	8947243	1185076	281104	9506765	10796493	314655	8944708	9884781	1953498	383906	7444443	15141098	8397668	19789919	4337625	11560147	16886186	44750054	673252	4145391	4305181
2010	1337705000	309321666	1234281170	142849468	128070000	81776930	73762519	27421461	241834215	34004889	114092963	51216964	195713635	72326988	22031750	62766365	38042794	65027507	59277417	16321872	29185507	2913021	35977455	23356246	88028	40788453	2877319	8363404	9054332	1240860	282131	9490583	10895586	322464	9199259	10048590	1987105	388646	7395599	15605217	8675602	20341241	4386768	11952136	17062536	45222699	689692	4273731	4295427
2011	1344130000	311556874	1250288729	142960908	127833000	80274983	74634956	28267685	245116206	34339328	115695473	52004172	197514534	73443863	22340024	63258810	38063255	65342780	59379449	16557201	30117413	2905195	36661444	24220661	89253	41261490	2876538	8391643	9173082	1278151	282987	9473172	11038264	330237	9460830	10212954	2015402	393688	7348328	16081911	8958406	20906388	4418636	12360989	17233576	45662747	706569	4394844	4280622
2012	1350695000	313830990	1265782790	143201721	127629000	80425823	75539862	29155187	248452413	34714222	117274155	52834005	199287296	74653016	22733465	63700215	38063164	65659809	59539717	16792089	31161376	2900401	37383887	25107931	90409	41733271	2884229	8429991	9295784	1299943	283700	9464495	11106932	338000	9729248	10377676	2039551	398989	7305888	16571246	9245988	21485266	4436415	12784750	17400347	46075721	723871	4510198	4267558
2013	1357380000	315993715	1280846129	143506995	127445000	80645605	76481943	30052518	251806402	35082954	118827161	53689236	201035903	75928564	23128129	64128273	38040196	65998687	60233948	17035550	32269589	2895092	38140132	26015780	91516	42202935	2897584	8479823	9416801	1315029	284296	9465997	11159407	345715	10004588	10542376	2062536	404421	7265115	17072775	9540289	22077298	4447942	13220424	17571507	46495492	741505	4622761	4255689
2014	1364270000	318301008	1295604184	143819666	127276000	80982500	77465753	30916994	255129004	35437435	120355128	54545991	202763735	77231907	23475686	64602298	38011735	66312067	60789140	17288285	33370794	2889104	38923687	26941779	92562	42669500	2912403	8546356	9535079	1336075	284825	9474511	11209057	353366	10286842	10706517	2088614	409769	7223938	17586017	9844297	22681858	4464175	13663559	17758959	46967706	759390	4736974	4238389
2015	1371220000	320635163	1310152403	144096870	127141000	81686611	78492215	31717667	258383256	35702908	121858258	55386367	204471769	78529409	23815995	65116219	37986412	66548272	60730582	17542806	34413603	2880703	39728025	27884381	93566	43131966	2925553	8642699	9649341	1371851	285324	9489616	11274196	360933	10575952	10869730	2120716	414907	7177991	18110624	10160030	23298368	4493170	14110975	17969353	47520667	777424	4856095	4203604
2016	1378665000	322941311	1324509589	144342396	126994511	82348669	79564016	32442572	261554226	36109487	123333376	56203654	206163058	79821724	24190907	65611593	37970087	66724104	60627498	17794055	35383128	2876101	40551404	28842484	94527	43590368	2936146	8736668	9757812	1425791	285796	9501534	11331422	368400	10872067	11031813	2159944	419800	7127822	18646378	10487998	23926539	4537687	14561666	18209068	48175048	795592	4980999	4174349
Normalized GWP (annual GHG per capita)	China	United States	India	Russian Federation	Japan	Germany	Islamic Republic of Iran	Saudi Arabia	Indonesia	Canada	Mexico	South Africa	Brazil	Turkey	Australia	United Kingdom	Poland	France	Italy	Kazakhstan	Afghanistan	Albania	Algeria	Angola	Antigua and Barbuda	Argentina	Armenia	Austria	Azerbaijan	Bahrain	Barbados	Belarus	Belgium	Belize	Benin	Bolivia	Botswana	Brunei	Bulgaria	Burkina Faso	Burundi	Cameroon	Central African Republic	Chad	Chile	Colombia	Comoros	Congo	Croatia
2000	3386.64	23019.1	1574.92	16501	9262.24	11225.7	7110.73	14108.2	6650.53	23831.9	5623.57	7681.51	9422.49	4157.8	31752.7	11538.5	9319.99	7793.8	8292.98	9974.72	724.256	2719.3	4112.14	9871.02	8024.63	9935.78	1997.01	8265.55	7346.62	36081.3	12927.5	6681.62	13153.5	22562.3	3395.01	13179.7	41561.8	56038.3	5676.75	2478.48	1918.83	12734.3	18201.2	4155.27	3861.21	7218.28	700.646	6321.52	3079.47
2001	3500.64	22597.6	1459.87	15961.3	9353.99	11786.7	7225.68	14050.6	7760.11	29110.4	5489.93	8360.31	10721.1	3620.22	36109.3	11625.9	9038.62	6929.72	8237.08	9989.01	623.409	2950.81	3981.68	8472.92	8418.38	10282	2065.11	9365.49	7355.26	35682.3	13027.5	5843.75	13132.7	27953.9	2608.55	12814.3	33158.6	54759.2	5823.35	2108.91	1409.84	12359.9	16356.7	3505.4	4044.83	7676.88	755.548	8244.42	3384
2002	3719.92	21978.8	1455.66	16387.1	9613.79	11542.9	7503.78	14593.2	10117.3	31300	5477.71	8597.88	10833.4	3725.05	35034.7	11255.8	8842.71	6755.9	8372.21	11102.4	712.365	3185.83	4157.57	9389.58	8812.82	10248.2	1951.23	9527.4	7415.61	35394.3	12946.9	6553.11	12371.3	36474.1	2700.33	13558.6	87009.5	54068.6	5564.52	2157.31	1516.98	11940	15025.8	3797.44	4062	7540.24	755.076	6938.77	3612.13
2003	4180.28	21899.3	1470.31	17643.2	9643.51	11523.5	7840.53	14761.3	8273.32	31651.2	5667.97	8945.57	10774.1	3851	31182.6	11352.5	9164.61	6792.04	8650.54	11834.4	708.589	3319.5	4286.49	9990.35	9331.65	10724.9	2110.72	10211.3	7077.88	34749.9	13050	6153.06	12654	37747.1	2599.54	12846.7	51551	56015.8	6227.39	2299.56	1502.35	12085.1	16695.9	3858.58	4077.69	7663.94	771.59	10508	3857.42
2004	4731.41	22200	1530.47	16962.1	9542.04	11285.8	8282.22	15126.2	9877.17	30088.6	5586.19	9425.56	10897.7	3892.95	33009.7	11182.3	9271.85	6696.29	8772.94	12916.8	661.229	3353.22	4349.36	10297.4	9709.22	11345.5	2259.46	10099.2	7172.7	32994.2	13150.1	6314.4	12469.8	24882.1	2509.68	14665.3	17128	54029.5	6108.7	2303.81	1344.7	11568.2	15063.6	3846.01	4370.91	7595.31	770.225	11442.9	3798.26
2005	5259.27	21919.6	1571.37	17365.7	9585.75	10992.7	8742.25	15424.8	8453.46	30136.1	5764.81	9337.39	10828.5	4026.16	30520.5	10999.8	9321	6655.66	8751.5	13600.7	666.166	3294.05	4455.84	9869.5	9942.92	11017.7	2492.23	10017.2	7574.02	34290.6	13281.6	6468.39	12014.9	32699.1	2620.82	13923.9	44044.8	53216.3	6165.32	2290.28	1203.01	11657.7	15330.4	3915.17	4379.98	7413.06	866.541	14146.6	3763.21
2006	5708.5	21411.8	1661.92	16633.5	8629.61	11146.3	9331.48	15929.7	11695	27082.8	5827.25	9235.62	7551.52	4040.76	30794.9	10874.2	7515.74	6836.7	8529.17	14857.5	784.624	2923.93	4337.86	8231.31	11607.7	11777.6	2687.35	10016.2	7083.46	34358.7	13550.7	6077.09	11725.5	25812.7	2604.39	14190.9	22642.7	57526.7	6728.04	2350.1	412.732	10848.5	14654.9	5444.14	4369.44	7194.99	798.18	12741.8	4411.81
2007	6148.08	21913.8	1756.93	16470	8940.56	10797.7	9767.79	16391.4	8852.92	27192	5938.05	9535.27	7711.18	4422.13	30189.3	10528.3	7519.04	6688.3	8362.66	15224.6	914.373	3050.49	4482.69	9384.19	12139.1	11732.1	2922.3	9688.4	6847.45	32879	13527.1	5809.04	11241.6	32773.2	2660.03	14893.6	44677.1	54458.4	7358.19	2350.54	342.143	10804.4	14759.4	5321.67	4831.16	7289.17	654.593	11186.4	4777.02
2008	6338.87	20609.9	1807.92	18330.5	8318.72	10871.5	9847.67	17403.1	8677.72	26406.8	6124.79	10091.1	7573.59	4349.7	28114.9	10099.7	7354.08	6562.49	8082.55	17998	1132.3	2894.16	4527.13	8018.66	12529.7	12035.4	3143.47	9632.88	7567.84	32665.2	14431.4	6263.65	11325	27247	2534.23	13946.5	24106.8	53581.6	7075.02	2315.9	423.327	10631.3	15147.3	5110.17	5059.17	7175.24	684.693	9447.87	4578.04
2009	6752.55	19121.3	1934.47	15975.5	7832.12	10184.3	10072.3	17679.9	10372.2	23815.8	5894.07	9553.06	7391.9	4343.72	28486.5	9134.14	6934.18	6261.76	7266.05	15613.8	1328.41	2951.3	4710.78	8025.13	13141.8	11597.8	2787.31	8733.93	7514.05	31246.9	14371.9	6008.35	10592.3	22659.7	2554.58	13465.1	14476.6	52304.5	6126.72	2312.91	453.697	10220.4	13387.5	4792.33	4843.6	7187.48	698.104	8597.5	3990.54
2010	7317.49	19758.8	1991.25	16812.5	8241.82	10574.1	10042.5	18799.5	8474.19	26006.3	5833.31	9567.34	7869.97	4417.58	26286.6	9268.98	7426.37	6290.26	7385.44	16981.5	1533.3	3038.08	4646.8	7997	13291.2	11074.2	2721.28	9371.78	7897.88	31397.6	14000.6	6467.46	11156.8	28809.4	2552.38	16892.9	18917	49119.2	6391.64	2319.1	451.842	9900.58	14156.2	4759.82	5067.24	7202.58	753.96	10089.5	3850.61
2011	8021.02	20015.1	2239.83	17334.8	9864.82	10121.6	10957.6	18907.5	9288.29	22037.1	5894.27	9155.8	6621.34	4522.91	27654	8506.48	9471.86	5409.63	7203.5	17763.3	1946.38	3197.72	4898.61	9119.49	12100.4	11151.3	2871.51	9038.75	8068.17	31044.8	13887.6	8920.98	9924.57	21772.2	2502.95	13973.4	23747.1	44705.5	7226.13	2133.45	827.156	9610.94	15040.8	4629.89	273.884	4027.35	707.645	11818.4	5169.81
2012	8222.74	18914.9	2325.59	17746.9	10251.5	10273.1	10934.4	19486.1	9337.72	22807.4	5730.84	9393.95	6789.9	4637.05	27178.4	8787.41	9287.46	5433.46	6926.64	17512.4	2151.7	3085.78	5071.7	7388.1	12166.9	11454.4	3182.83	8683.28	8100.45	31447.5	13852.7	9332.77	9801.09	9792.9	2427.73	13357.5	16758.6	44337.1	6479.71	2107.26	783.042	9270.54	14390	4534.31	150.572	3956.1	718.36	10913	4709.95
2013	8524.47	19165.9	2337.88	16819.9	10476.5	10466.2	11072	19490.9	9112	24437.5	5620.26	9408.03	6806.64	4444.31	22883.8	8439.02	9151.37	5418.29	6336.79	18052.2	2364.15	3112.16	5072.09	7774.13	12129	11054.2	3150.9	8701.83	7962.36	33276.8	13823.6	9195.02	9827.58	22099.1	2405.9	13051.1	32164.3	43247	5823.72	2105.11	824.923	9467.64	15110.4	4327.4	15.9349	4131.37	741.735	11019.4	4464.61
2014	8496.94	19157.2	2441.87	16790.7	10194.1	9924.61	11086.6	20349.3	10708.9	23122.2	5448.38	9543.14	6970.82	4691.2	22915.2	7754.83	8814.38	4895.94	5965.21	16777.3	2595.08	3291.68	5236.14	6810.24	12208	10963.8	3128	8209.35	7889.81	34354.4	13166	9292.3	9244.31	10131.1	2388.49	12945.4	16431.9	42462.9	6198.84	2053.34	772.021	8946.8	15131.6	4151.19	319.839	4276.34	724.266	6797.59	4308.24
2015	8448.11	18608.3	2425.06	16078.1	9962.64	9902.6	10871.9	20826.9	10755.7	24137.2	5562.94	8944.26	6895.52	4700.15	22519.7	7442.54	8922.66	4978.34	6151.76	16286.4	2718.11	3228.38	5349.12	7388.72	14428.3	10909.5	2984.05	8271.72	7655.45	34238.4	14930.4	8872.86	9628.18	14434.8	2403.57	13024.2	62172.4	39960.8	6584.01	2058.46	723.423	8906.2	15763.9	6864.87	31.7207	4202.59	758.917	9861.83	4484.25
2016	8397.16	18063.6	2442.91	16567.4	9952.16	9820.8	10909	20454	8522.13	21580.8	5581.46	8849.78	6690.72	4960.43	21458.1	7034.43	9211.46	4939.74	6096.74	16242.5	2729.83	3195.3	5180.83	6244.95	14599	11059.3	3221.91	8223.96	7581.62	33013.3	15220.6	8493.37	9473.66	13192.2	2440.2	13682.2	32403.6	40019.1	6182.81	2071.72	737.986	8709.16	16689.1	7002.63	205.392	4815.77	754.155	9991.97	4537.23
Normalized Water use (annual water withdrawal in L per capita)	China	United States	India	Russian Federation	Japan	Germany	Islamic Republic of Iran	Saudi Arabia	Indonesia	Canada	Mexico	South Africa	Brazil	Turkey	Australia	United Kingdom	Poland	France	Italy	Kazakhstan	Afghanistan	Albania	Algeria	Angola	Antigua and Barbuda	Argentina	Armenia	Austria	Azerbaijan	Bahrain	Barbados	Belarus	Belgium	Belize	Benin	Bolivia	Botswana	Brunei	Bulgaria	Burkina Faso	Burundi	Cameroon	Central African Republic	Chad	Chile	Colombia	Comoros	Congo	Croatia
2000	436782	1.9868e+06	606204	448645	667360	459181	1.38518e+06	1.05063e+06	631637	1.3283e+06	734076	293766	324904	607209	1.09487e+06	236533	306597	531418	737064	1.49628e+06	977866	538357	195250	40657.6	101294	862200	564570	446729	1.25115e+06	532341	298326	178865	657286	408386	20201.1	237341	120487	276139	806470	65179.5	44647.4	65425	18871.4	103092	2.02707e+06	220818	18438	14708.7	128349
2001	433620	1.96723e+06	595814	450552	665754	458410	1.36796e+06	1.02393e+06	623055	1.31395e+06	723842	289876	320492	598203	1.0802e+06	235624	306682	527564	736651	1.49882e+06	940436	543433	192709	39337.3	99725.4	852836	568069	445022	1.24149e+06	507207	297248	179785	655029	395981	19599.4	232861	118232	270561	822685	63342.5	43643.9	63720.6	18457.7	99261.9	2.00437e+06	217384	17989.2	14294.9	133383
2002	430725	1.94906e+06	585832	452629	664208	457640	1.35097e+06	995629	614655	1.29974e+06	713971	286235	316313	589451	1.0671e+06	234628	306824	523742	735554	1.49876e+06	899084	545065	190268	38049.2	98346	843644	571197	442838	1.23226e+06	481265	296242	180933	652099	384941	19012	228531	116153	265296	840738	61546.7	42481.4	62050.7	18068.8	95507	1.98286e+06	214090	17559.9	13895.7	133305
2003	443418	1.83277e+06	643981	439686	649713	391353	1.36958e+06	1.0331e+06	799784	1.30578e+06	765902	305014	342447	594195	824814	142722	314884	504620	586252	1.52995e+06	860188	417158	224491	38948.3	117276	922078	935409	420862	1.49014e+06	492226	295266	167709	599163	374872	24240.2	232881	116352	260407	797651	64640.4	40540.4	64758.6	18679.9	93834.8	2.23538e+06	271431	17146.5	26915.8	151276
2004	440792	1.81588e+06	633662	441460	649494	391438	1.35313e+06	1.00291e+06	789124	1.29365e+06	755394	301322	338358	586024	815306	141912	315068	500918	582470	1.51935e+06	823806	418905	221552	37626.3	115764	912398	940774	418259	1.47716e+06	461894	294242	168857	596576	365275	23522.6	228690	114300	255959	803695	62775.5	39275.4	63038.4	18308.7	90356.6	2.2123e+06	267611	16744	26121.9	151234
2005	438208	1.79922e+06	623731	443147	649433	391660	1.3374e+06	974128	778649	1.28149e+06	744775	297615	334503	578321	804617	140941	315207	497156	579615	1.50591e+06	794020	421054	218494	36318.5	114159	902992	946912	415419	1.46213e+06	431079	293135	170014	593303	355884	22838.2	224646	112169	251976	809769	60945	38031.9	61353.1	17952.7	87118.2	2.18937e+06	264023	16349.8	25312.1	151039
2006	435768	1.78196e+06	614164	444601	649022	392102	1.32238e+06	947004	768364	1.26861e+06	734008	293878	330876	571143	792834	139909	315406	493702	577876	1.49006e+06	770626	423719	215303	35027.5	112449	893869	954262	413369	1.44616e+06	399930	291916	171058	589403	346687	22186	220745	109918	248472	815943	59150.3	36817.2	59702.6	17605.3	84114.9	2.16638e+06	260643	15963.6	24485.1	151003
2007	433498	1.76509e+06	604965	445362	648276	392627	1.30789e+06	921198	758260	1.25635e+06	723181	290107	327459	564371	787897	138824	315578	490657	574965	1.47312e+06	751646	426934	211988	33761.7	110680	884985	962621	412031	1.42985e+06	370010	290635	171845	585091	337764	21561.7	216981	107600	245356	821965	57395.4	35626.1	58087.8	17270.1	81308.7	2.14335e+06	257445	15585.5	23657.7	151036
2008	455439	1.54262e+06	633813	430356	636015	320423	1.29367e+06	806534	876546	1.1601e+06	746558	307155	364161	717282	753911	132898	301109	435884	580178	1.36468e+06	734788	405454	242581	32531.9	134665	942611	1.01148e+06	419636	1.36591e+06	372945	289342	160055	466294	329180	25974.7	214783	101428	242475	762757	55685.2	34469.2	56511.7	16965.5	78651	2.12051e+06	286747	15215.4	22859.4	161566
2009	453180	1.52915e+06	624935	430226	636095	321236	1.2794e+06	784069	864972	1.14693e+06	735614	302910	360675	708203	738531	131896	300905	433647	577541	1.32916e+06	717385	408195	238440	31349	132571	933236	1.01832e+06	418538	1.33784e+06	350779	288150	160412	462558	320986	25255.2	211234	99462.6	239642	767687	54025.1	33354.5	54977.5	16714.2	76089	2.09816e+06	283575	14853.3	22121	161735
2010	450996	1.51654e+06	616553	430033	635980	321729	1.26487e+06	761447	853477	1.13425e+06	725110	298534	357308	698356	727132	130866	301765	431510	575767	1.31051e+06	697949	410227	234174	30218.9	130640	926243	1.02213e+06	417533	1.32202e+06	335010	287101	160686	458351	313213	24556.3	207790	97780.4	236719	772757	52418.4	32285.9	53487.4	16527	73593.5	2.07648e+06	280611	14499.2	21456.7	162103
2011	448841	1.50566e+06	608659	429698	637159	327748	1.25008e+06	738653	842050	1.1232e+06	715067	294015	354050	687736	717099	129848	301603	429428	574778	1.29189e+06	676353	411332	229805	29140.4	128847	915624	1.02241e+06	416128	1.3049e+06	325235	286232	160981	452426	305841	23877.4	204446	96407.6	233688	777728	50864.6	31266.7	52041.5	16407.8	71159.4	2.05587e+06	277907	14152.9	20865.4	162663
2012	446659	1.49475e+06	601209	428975	638178	327134	1.23511e+06	716168	830743	1.11107e+06	705441	289397	350900	676597	704688	128948	301604	427354	573231	1.27381e+06	653694	412012	225364	28110.6	127200	905273	1.01968e+06	414235	1.28768e+06	319783	285513	161129	449629	298817	23218.6	201201	95266.1	230583	782246	49362.6	30294.2	50639.4	16342	68800.7	2.03617e+06	275416	13814.6	20331.7	163161
2013	440628	1.40604e+06	594139	448828	639099	303054	1.2199e+06	776973	884012	1.01474e+06	739225	360966	326708	776519	715579	131299	264983	400159	567620	1.43523e+06	631244	490485	274252	27129.7	125661	895198	989100	411801	1.35715e+06	330335	284914	147581	357904	292148	23389.3	198058	93574.1	227486	778928	47912.5	29359.7	49281.4	16299.7	66533.4	2.01633e+06	292717	13486.1	19836.6	168010
2014	438403	1.39585e+06	587371	447853	639948	301794	1.2044e+06	755248	872500	1.00459e+06	729840	355297	323924	763415	704985	130336	265181	398268	562436	1.41425e+06	610414	491502	268731	26197.2	124241	885410	984067	408595	1.34031e+06	325131	284385	147448	356319	285823	22747.5	195021	92405.8	224517	783368	46514.2	28453	47967.9	16240.4	64375.6	1.99505e+06	289774	13168.5	19358.3	168696
2015	436181	1.38569e+06	580848	446991	640627	299192	1.18865e+06	736183	861511	997118	720837	349906	321218	750802	694911	129307	265358	396855	562978	1.39373e+06	591917	492935	263290	25311.7	122908	875916	979644	404040	1.32444e+06	316652	283888	147214	354260	279830	22125.7	192093	91007	221736	788382	45166.9	27568.8	46698.5	16135.6	62334.5	1.97169e+06	286402	12863	18883.5	170092
2016	433825	1.37579e+06	574552	446231	641366	296787	1.17264e+06	719733	851066	985890	712216	344817	318583	738646	684141	128331	265472	395809	563936	1.37405e+06	575698	493724	257944	24470.8	121658	866705	976109	399695	1.30972e+06	304673	283419	147029	352471	274159	21523	189271	89354.2	219152	793931	43869.1	26706.7	45472.5	15977.3	60405.2	1.94573e+06	282511	12569.3	18410	171284
Normalized Energy use (MJ per capita)	China	United States	India	Russian Federation	Japan	Germany	Islamic Republic of Iran	Saudi Arabia	Indonesia	Canada	Mexico	South Africa	Brazil	Turkey	Australia	United Kingdom	Poland	France	Italy	Kazakhstan	Afghanistan	Albania	Algeria	Angola	Antigua and Barbuda	Argentina	Armenia	Austria	Azerbaijan	Bahrain	Barbados	Belarus	Belgium	Belize	Benin	Bolivia	Botswana	Brunei	Bulgaria	Burkina Faso	Burundi	Cameroon	Central African Republic	Chad	Chile	Colombia	Comoros	Congo	Croatia
2000	33622.4	337178	12627.2	176243	173947	174032	78452.2	232564	20146.5	417406	59266.5	94804.8	46009.5	48903	246887	162550	95701.2	181406	131584	90193.8	1000.83	31831	34783.9	7103.62	101252	66992.2	33865.6	172413	58715.3	606519	92441.3	92131.5	264143	35852.3	3408.12	18530.6	29328.7	212651	95056.5	1318.06	908.625	5415.57	1577.29	445.064	71964.6	27974.2	2907.31	4087.6	76855.8
2001	35257.3	325981	12475.3	179762	171838	176808	81742.4	241503	21034.3	402866	57725.2	94039	44494.2	43814.3	245821	163715	95049.4	182224	132186	101703	746.592	29621.9	35574.9	7453.97	99684	65534.1	33385.1	178154	56166.8	598098	92160	90273.1	261100	35991.1	3763.94	15500.1	29936.3	236899	101080	1405.09	746.42	5226.12	1590.11	411.106	71636.6	27096.7	2966.07	4943.67	83928
2002	38148	327645	12831.2	179903	170930	174172	87768.4	244577	21673	410768	58789.7	90435	44950	47170.9	246444	159361	94069.4	179115	130932	104102	678.88	32028.2	36383.1	7691.97	105386	61719.7	32139.2	177670	55044.4	605522	92467	93553.6	258867	33492.1	4205.28	16645.3	30373.1	271249	100377	1418.84	687.876	5056.14	1556.6	390.765	73347.5	26587	2907.92	4267.3	84169
2003	44144.1	325862	13106.4	184476	169891	173908	88578.9	251559	23021.7	408883	58477.5	96808.3	45173.6	49243.9	247090	160869	97404.8	179708	134620	114280	766.34	37931.5	37588.3	8256.48	109362	65509.2	35674	179107	59094.1	597251	93146.6	93789.4	267527	31961.4	4730.4	22031.3	30026.3	275452	104198	1539.61	529.385	5280.59	1456.26	371.371	72165.8	27120.2	3635.73	4864.92	88139.5
2004	51344.1	329218	13836.2	186770	171865	173778	95958.6	264946	22601.8	409888	60782.4	104365	46815.6	51932.5	252351	160808	98096.4	179846	136180	120375	679.768	41432.4	38512.1	8823.37	111985	68276.8	37511.4	180983	66426.5	580551	93503.4	106362	267275	29281.3	4826.32	22462.5	29441.9	300654	101727	1337.99	592.622	5378.73	1528.23	376.835	75055.5	27210.2	3893.99	4999.33	91332.2
2005	57989.3	326335	14432.5	187277	174898	171772	101717	274277	22853	410199	63775.5	97652.8	47591.2	52478.5	248083	161448	100288	177512	135656	125308	843.228	41182.3	39765.9	7242.38	112112	72064.6	43764.9	182817	71281.9	607826	93881.4	106709	262746	30634.2	4375.17	21627.4	30987.9	333424	110779	1373.27	489.296	5056.08	1548.44	391.14	77183.4	26899.7	3655.17	6684.71	90253.4
2006	63218.4	320593	14938.1	196023	174268	176182	109898	276831	22878.7	400836	64842.6	98360.6	48250.5	57497.2	259224	158307	105296	174805	134612	131069	992.303	38579.8	40577.2	8819.95	113828	74951.4	43623.9	179858	69371.9	601666	93698.6	114043	261567	35032.6	5906.76	23412.1	31178	506705	114332	1310.97	554.112	5951.45	1591.91	383.509	81551.6	29769.1	4155.01	7807.24	89182.5
2007	68357.9	322000	15998.1	197537	172311	168842	116339	281001	24229.6	410935	64218.6	99698.6	50673.7	60434.4	260892	152423	105014	170652	131427	144368	1249.61	30513.8	42103.9	9781.05	117392	77481.3	49091.8	175112	62046.5	571496	89011.8	111877	261228	31939.8	6816.54	24735.6	30837.3	525265	111570	1820.96	858.537	5793.74	1577.89	374.042	82434.5	29506.5	2676.35	9343.37	89904.4
2008	70542.9	311091	16661.4	198512	169858	170847	119516	298094	23602.2	404914	64593.9	105476	52385.6	59939.1	259932	148491	106783	170171	128750	150441	2129.31	34402.2	43898.8	11049.6	118163	78022.6	47780.6	178042	61347.1	556862	104484	113588	263628	28582	6753.42	24970.7	31225.9	533139	110541	1929.43	535.164	5725.92	1571.97	364.069	80837.4	31498.5	2667.56	10347.3	89266.1
2009	73256.3	293130	17675.9	188530	154892	160610	122139	305430	24129.6	378718	63141.6	103730	51465.8	59953.4	252478	140070	102869	159869	119650	132474	3398.82	39848.8	45726.3	12131.7	121887	75755.8	42936.9	171576	53085.6	517492	98060.5	107924	244326	29621	7242.09	24226.7	28438.8	349557	97634.8	1755.41	517.858	5996.33	1546.19	372.141	78331.4	29711.7	3176.23	12241.5	87993.5
2010	77957.5	300570	18273.6	195970	165003	167605	121136	325163	26139.1	382489	64061.4	103256	56108.9	62236.7	249529	142405	109944	163801	122889	140813	4094.44	48028.1	43767.6	12636.2	116145	79119	49083.2	176961	51742.4	499624	94169	114787	257767	33469.8	8070.91	24222.6	24966.8	393304	102202	1806.78	578.865	6666.5	1568.26	390.357	77861.3	31469.4	3679.9	16448.7	89412.8
2011	83727.7	295575	19100	202263	156938	164462	125109	325611	28144.3	396198	66208.7	100275	58136	65496	254972	133577	110426	156698	119827	152883	5378.59	35489.5	45604.3	12850.3	114228	79713	52141.4	165154	56817.3	480070	98527.5	114351	237148	27427.6	7280.8	23713.3	24619.8	398829	109420	1984.69	620.066	6840.49	1641.68	396.959	83809.5	32590.7	3230.26	19476.7	78672.1
2012	86655.7	285784	19840.2	202375	156099	166226	124576	334686	29254.9	387982	65705.6	97208.5	58650.4	68399.3	247508	134279	107062	155726	116248	156228	4652.64	36197.3	48881.2	13859.9	115873	81059.4	55916.6	172443	57764.8	507849	92379.3	123674	226501	27585.8	6670.69	28890.1	23535.8	382549	104584	2287.36	564.18	6135.59	1696.78	384.927	84853	34563.1	3277.38	19515	73120.1
2013	89418.4	291447	20359.2	199346	154945	170449	128810	326033	30063.7	395685	65122.4	96003.2	60339.9	66731.6	245112	132734	107432	156256	109470	155896	3660.18	46038.7	50682.6	14154.2	114511	83515	54040.1	170315	58628.1	558710	93616.5	109048	231235	30354.5	6626	28931.1	28628.4	351008	97251.5	2679.63	615.83	5465.07	1694	375.51	84859.7	34724.6	3816.02	24046.4	79924
2014	91036.3	292347	21504.8	199606	151173	162582	132709	339701	27796.1	395965	63954	95695.2	61162.2	67740.9	244961	124152	103511	148856	102498	155887	3201.63	39659.6	54158.8	14645.6	115745	82186.7	54682.3	161959	59050.5	536717	81271	112484	214516	28994.3	6886.2	28799.6	30484.1	389608	104084	2424.15	518.554	6924.67	1707.19	363.331	82351.2	36241.8	3327.93	22362.4	80097.3
2015	91434.6	287395	21959.9	195288	149189	164040	130188	341581	27489.7	391947	63092.2	91099.5	59829.4	72880.1	245087	124556	104663	149116	104868	151725	3443.44	42096	55953.8	14625	117196	83135.7	49836.7	160402	63796.7	535852	86327.1	102048	216338	31219.1	7485.28	27665	35930.1	418891	111481	2857.64	534.683	7190.31	1696.98	356.403	83211.9	36027.1	3510.05	21700.4	76789
2016	92082.4	284937	22700.8	199246	146840	165391	135650	338346	27908.5	385956	63125	94259.4	57811.2	75302.2	243181	122143	109317	146299	106067	151959	3636	49374.3	54758.9	12981	116805	82041	51590.5	163927	62478.8	511848	90454.7	101376	231863	30175.9	7662.87	29675.4	35099.2	445978	106290	2746.96	584.554	7210.97	1726.34	354.025	86154.5	37507.4	3592.8	20372.1	80336.1
Normalized GWP (annual GHG per sountry arable land)	China	United States	India	Russian Federation	Japan	Germany	Islamic Republic of Iran	Saudi Arabia	Indonesia	Canada	Mexico	South Africa	Brazil	Turkey	Australia	United Kingdom	Poland	France	Italy	Kazakhstan	Afghanistan	Albania	Algeria	Angola	Antigua and Barbuda	Argentina	Armenia	Austria	Azerbaijan	Bahrain	Barbados	Belarus	Belgium	Belize	Benin	Bolivia	Botswana	Brunei	Bulgaria	Burkina Faso	Burundi	Cameroon	Central African Republic	Chad	Chile	Colombia	Comoros	Congo	Croatia
2000	3.57338	3.70371	1.034	1.94493	26.2595	7.81837	3.12671	8.11609	6.86185	1.78492	2.42816	2.50087	3.62383	1.10358	2.59089	11.5645	2.5482	2.58652	5.56929	0.492253	0.195887	1.45329	1.66601	5.39467	15.25	1.3254	1.36222	4.73338	3.23894	1199	23.4	1.08723	15.6427	8.71875	0.979412	3.52894	19.5143	933.5	1.31537	0.777568	1.275	3.31477	3.43316	0.964444	3.38514	10.1512	0.584615	4.03469	1.6342
2001	3.70229	3.67139	0.978862	1.88114	26.7631	8.21663	3.02717	8.27528	8.23752	2.20531	2.37843	2.784	4.1276	0.976388	2.89665	12.1628	2.54498	2.31763	5.62777	0.505523	0.175322	1.56228	1.65146	4.786	16.25	1.38135	1.38462	5.43043	3.24999	1244.5	23.6667	1.00712	15.987	10.9692	0.753469	3.49048	27.765	931	1.34526	0.559778	0.94359	3.30336	3.1544	0.78	3.58629	12.6968	0.646154	5.41429	1.70574
2002	3.94778	3.65462	0.992009	1.9286	27.7264	8.07531	3.14985	8.83917	10.951	2.41677	2.40252	2.89635	4.17366	1.01138	2.9007	11.5496	2.59846	2.27281	5.76457	0.581989	0.20969	1.68166	1.75487	5.30645	17.25	1.38601	1.3011	5.55957	3.29832	1301	25.2857	1.15118	15.3642	13.6714	0.772549	3.59212	60.5388	937.5	1.29985	0.564255	1.03144	3.27701	2.9601	0.925676	3.86121	13.9398	0.661538	4.68776	1.81119
2003	4.45719	3.72115	1.02271	2.08231	28.0111	8.0416	3.29765	9.20806	8.13483	2.4864	2.47024	3.07301	4.15191	1.08895	2.66949	11.9659	2.78168	2.30332	6.2293	0.622504	0.215903	1.74567	1.84309	5.48606	18.5	1.42413	1.4	6.00929	3.16998	1591.76	25.5714	1.08242	15.7246	14.5286	0.737736	3.25583	45.8513	989.5	1.45712	0.570588	1.04848	3.40671	3.39267	0.951842	4.30867	14.0428	0.692308	7.30612	1.9213
2004	5.06709	3.85736	1.08269	2.00063	27.8397	7.82703	3.48958	9.99743	8.94117	2.40569	2.51503	3.3515	4.19893	1.09283	2.5809	11.5278	2.80745	2.28599	6.34252	0.680928	0.209186	1.75606	1.89764	5.85333	19.5	1.41904	1.49011	5.98347	3.23681	1825.33	27.8462	1.10743	15.4702	9.82857	0.733962	3.71612	13.3805	971	1.42288	0.652609	0.973604	3.35	3.09067	0.985263	4.66667	14.2797	0.707692	8.19796	1.93034
2005	5.65413	3.89582	1.13101	2.04654	28.0917	7.61559	3.68886	10.496	8.33666	2.4528	2.6232	3.3934	4.16999	1.14725	2.35762	11.5971	2.93007	2.28811	6.52082	0.721265	0.218962	1.84387	1.96658	5.81212	20.25	1.30256	1.63297	5.96944	3.44835	2032.67	28.2308	1.12793	14.9348	13.2571	0.788244	3.37756	33.0167	971.5	1.48818	0.627347	0.926778	3.46688	3.20777	1.01359	4.88828	15.6046	0.815385	10.4592	1.85796
2006	6.15421	3.89505	1.2208	1.95717	25.4048	7.73799	3.94216	11.3116	12.4739	2.24555	2.68279	3.55421	2.905	1.20896	2.6308	10.8576	2.31776	2.37178	6.72343	0.7948	0.266102	1.49829	1.95355	5.02606	24	1.32765	1.75535	6.01365	3.264	2271.03	28.9231	1.05361	14.6888	10.7429	0.856	3.41434	20.6816	1065	1.63282	0.691489	0.348889	3.31545	3.12694	1.45974	5.29333	16.32	0.769231	9.73878	2.15891
2007	6.66612	4.08031	1.31553	1.93462	26.454	7.47908	4.13065	11.9794	9.35086	2.29997	2.75632	3.71722	2.95967	1.39997	2.71901	10.61	2.42434	2.34144	6.81495	0.82308	0.317937	1.56747	2.05061	5.77	25.5	1.27791	1.8956	5.84084	3.16936	2432.86	29	1.00634	14.2372	14	0.8996	3.41309	46.0385	680.667	1.79968	0.683673	0.316471	3.39376	3.21036	1.47615	6.32805	15.9565	0.646154	8.84898	2.41667
2008	6.8944	3.9067	1.37392	2.15089	24.7289	7.48123	4.5688	13.4933	9.0015	2.28128	2.95803	3.92445	2.8995	1.42102	2.48986	10.3952	2.32816	2.31248	6.34129	0.989137	0.402746	1.39836	2.09948	5.11676	26.75	1.36803	2.02931	5.85537	3.56521	3034.17	31.0769	1.08194	14.3709	11.9429	0.8816	3.17815	16.552	677.667	1.71665	0.567	0.382222	3.4325	3.35389	1.46538	6.44284	17.3519	0.692308	7.73469	2.29232
2009	7.36935	3.68757	1.49164	1.87512	23.3554	6.98301	4.71875	14.7315	10.4874	2.10287	2.9859	3.80893	2.82224	1.45099	2.27665	9.40387	2.19252	2.21941	6.15084	0.878008	0.484024	1.41872	2.22141	4.517	28.5	1.36915	1.79128	5.33221	3.58751	2722.79	31.0769	1.0303	13.6143	9.76712	0.914	2.98833	8.94937	502	1.44978	0.614386	0.401053	3.39192	2.97795	1.385	6.24351	18.1206	0.723077	7.128	1.97858
2010	8.06514	3.87519	1.56536	1.97425	24.6504	7.29968	4.81326	16.211	8.68369	2.34654	3.09165	3.90976	2.99632	1.49415	2.27558	9.74506	2.60892	2.23511	6.21684	0.966295	0.574233	1.41374	2.22847	4.55561	29.25	1.18928	1.74582	5.74718	3.79545	2435	32.9167	1.10894	14.5755	12.3867	0.9392	3.95043	14.5135	477.25	1.48368	0.603167	0.412632	3.24823	3.45	1.35452	6.80252	18.4753	0.8	8.4549	1.82884
2011	8.93675	3.98809	1.78395	2.03717	29.6439	6.84219	5.37544	16.919	9.68813	2.02961	3.21533	3.95695	2.51371	1.61731	1.94918	8.87677	3.2486	1.93429	6.36518	1.0079	0.752407	1.49357	2.39389	4.69957	27	1.18646	1.83882	5.57885	3.9248	2480	35.7273	1.52849	13.2788	9.58667	0.9472	3.28976	14.7716	440	1.63385	0.60193	0.741	3.24081	3.69222	1.33093	0.35839	11.5952	0.769231	9.8	2.46794
2012	9.25847	3.82955	1.8804	2.08911	30.8146	6.98175	5.49262	18.2265	9.87226	2.10939	3.34268	4.136	2.57007	1.68232	1.95294	9.01095	3.23579	1.95146	5.7939	1.00254	0.860719	1.44565	2.52581	3.94681	27.5	1.20247	2.04728	5.40182	3.96984	2555	39.3	1.5996	13.5567	4.24359	0.908462	3.13478	11.993	442.25	1.42719	0.582	0.658182	3.21258	3.54667	1.24667	0.204209	11.5513	0.8	9.28679	2.21756
2013	9.66166	3.8934	1.9141	1.98421	31.505	7.10719	5.76571	19.0922	9.76366	2.26912	3.38919	4.20925	2.56867	1.64018	1.69522	8.6376	3.22572	1.95349	5.59089	1.04621	0.979961	1.46006	2.58064	4.12755	27.75	1.17514	2.03704	5.45018	3.89446	2735	41.3684	1.56555	13.44	9.79487	0.891481	3.05348	23.6929	349.8	1.21615	0.579677	0.655833	3.37129	3.73389	1.1442	0.0213904	11.4203	0.846154	9.26182	2.16796
2014	9.68795	3.90633	2.02201	1.98509	30.7312	6.77159	5.84755	18.3423	11.6262	2.15448	3.43014	4.33783	2.62256	1.75037	1.68318	8.0369	3.06598	1.7709	5.38971	0.984215	1.1144	1.54483	2.7286	3.74449	28.25	1.19342	2.03575	5.1905	3.90501	2868.75	41.6667	1.5549	12.683	4.58974	0.91	3.10136	8.53731	348	1.28457	0.601833	0.633333	3.27306	3.75278	1.09077	0.440583	11.7683	0.846154	5.85455	2.24628
2015	9.68634	3.8089	2.03125	1.9045	30.1227	6.82855	5.81031	18.9278	11.6768	2.25111	3.28897	4.12825	2.58619	1.78741	1.72505	8.06239	3.11325	1.79288	5.65975	0.965201	1.20464	1.51195	2.84786	4.20469	33.75	1.20038	1.95433	5.3109	3.81225	2935.62	53.25	1.48307	13.0862	5.92045	0.941481	3.20584	50.7897	331.6	1.34655	0.621333	0.6125	3.34677	3.935	1.86288	0.043412	11.5339	0.907692	8.70727	2.23421
2016	9.68671	3.71108	2.06862	1.9658	30.2072	6.87579	5.90972	19.0848	8.84524	2.0225	3.10543	4.14492	2.5016	1.94265	1.72702	7.65913	3.23672	1.79561	5.51934	0.975029	1.24971	1.48154	2.83744	3.67592	34.5	1.2298	2.11918	5.34403	3.70085	2941.88	62.1429	1.41982	12.6383	5.52273	0.9475	3.40108	26.9607	336	1.26058	0.643833	0.645	3.36097	4.20722	1.96096	0.294535	13.2103	0.923077	9.04909	2.16705
Normalized Water use (annual water withdrawal in L per land area)	China	United States	India	Russian Federation	Japan	Germany	Islamic Republic of Iran	Saudi Arabia	Indonesia	Canada	Mexico	South Africa	Brazil	Turkey	Australia	United Kingdom	Poland	France	Italy	Kazakhstan	Afghanistan	Albania	Algeria	Angola	Antigua and Barbuda	Argentina	Armenia	Austria	Azerbaijan	Bahrain	Barbados	Belarus	Belgium	Belize	Benin	Bolivia	Botswana	Brunei	Bulgaria	Burkina Faso	Burundi	Cameroon	Central African Republic	Chad	Chile	Colombia	Comoros	Congo	Croatia
2000	460.866	319.671	397.999	52.8808	1892.04	319.807	609.086	604.399	651.707	99.485	316.961	95.6415	124.956	161.168	89.3367	237.066	83.8276	176.361	494.988	73.8412	264.48	287.716	79.1047	22.22	192.5	115.014	385.111	255.826	551.599	17690	540	29.1048	781.671	157.812	5.82773	63.5496	56.5714	4600	186.869	20.4486	29.6667	17.0302	3.55959	23.9278	1777.14	310.539	15.3846	9.38776	68.1116
2001	458.598	319.612	399.501	53.1003	1904.82	319.563	573.104	603.056	661.386	99.5409	313.593	96.529	123.389	161.338	86.6529	246.505	86.3516	176.443	503.298	75.8523	264.48	287.716	79.9288	22.22	192.5	114.575	380.879	258.039	548.565	17690	540	30.9842	797.396	155.385	5.66122	63.4286	99	4600	190.049	16.8133	29.2103	17.0302	3.55959	22.0872	1777.14	359.532	15.3846	9.38776	67.2333
2002	457.109	324.089	399.235	53.2702	1915.59	320.159	567.097	603.056	665.306	100.357	313.147	96.4234	121.862	160.04	88.3505	240.754	90.1614	176.197	506.456	78.5652	264.652	287.716	80.3101	21.5032	192.5	114.098	380.879	258.412	548.087	17690	578.571	31.7842	809.856	144.286	5.43922	60.5455	80.8163	4600	196.393	16.0979	28.8844	17.0302	3.55959	23.2811	1884.85	395.794	15.3846	9.38776	66.8415
2003	472.791	311.425	447.938	51.8934	1887.2	273.104	576.033	644.444	786.397	102.577	333.798	104.779	131.965	168.022	70.611	150.433	95.5748	171.127	422.164	80.4767	262.095	219.377	96.5257	21.3879	232.5	122.44	620.44	247.676	667.392	22547.1	578.571	29.5026	744.551	144.286	6.87925	59.0211	103.487	4600	186.639	16.0392	28.2929	18.255	3.79581	23.1474	2362	497.35	15.3846	18.7143	75.3472
2004	472.065	315.519	448.269	52.0688	1894.95	271.474	570.119	662.857	714.344	103.432	340.096	107.143	130.371	164.509	63.7455	146.297	95.4005	171.004	421.105	80.0947	260.619	219.377	96.6636	21.3879	232.5	114.119	620.44	247.807	666.594	25553.3	623.077	29.6143	740.119	144.286	6.87925	57.9491	89.292	4600	187.202	17.7826	28.4365	18.255	3.75648	23.1474	2362	503.128	15.3846	18.7143	76.8595
2005	471.108	319.78	448.935	52.2249	1903.21	271.337	564.326	662.857	767.89	104.301	338.899	108.159	128.815	164.792	62.1544	148.595	99.0857	170.915	431.877	79.8605	260.987	235.688	96.4319	21.3879	232.5	106.756	620.44	247.556	665.69	25553.3	623.077	29.6463	737.485	144.286	6.86888	54.4929	84.0833	4600	195.462	16.6939	29.2992	18.2458	3.75648	22.5538	2443.45	555.775	15.3846	18.7143	74.5704
2006	469.792	324.157	451.148	52.3138	1910.66	272.206	558.649	672.464	819.535	105.185	337.927	113.095	127.285	170.88	67.7316	139.695	97.2671	171.274	455.531	79.7107	261.355	217.123	96.9612	21.3879	232.5	100.763	623.316	248.185	666.377	26434.5	623.077	29.657	738.361	144.286	7.292	53.1114	100.398	4600	198.02	17.4043	31.1222	18.2458	3.75648	22.5538	2624.44	591.2	15.3846	18.7143	73.8933
2007	470.024	328.656	452.975	52.3138	1918.17	271.954	553.086	673.244	800.909	106.265	335.686	113.095	125.684	178.671	70.9622	139.901	101.751	171.769	468.554	79.6405	261.355	219.377	96.9742	20.7588	232.5	96.3961	624.419	248.401	661.812	27378.6	623.077	29.7699	741.001	144.286	7.292	49.7243	110.879	3066.67	201.037	16.6939	32.9529	18.2458	3.75648	22.5538	2807.45	563.564	15.3846	18.7143	76.4085
2008	495.354	292.41	481.661	50.4977	1890.67	220.499	600.193	625.337	909.251	100.221	360.558	119.453	139.417	234.331	66.7664	136.786	95.3251	153.596	455.188	75.0005	261.355	195.902	112.498	20.7588	287.5	107.144	652.975	255.077	643.479	34641.7	623.077	27.6468	591.706	144.286	9.036	48.9451	69.6416	3066.67	185.071	13.6333	31.1222	18.2458	3.75648	22.5538	2700.46	693.443	15.3846	18.7143	80.8993
2009	494.575	294.9	481.877	50.4977	1896.83	220.26	599.383	653.317	874.576	101.271	372.658	120.774	137.706	236.57	59.0238	135.791	95.1434	153.701	488.898	74.7426	261.388	196.223	112.438	17.645	287.5	110.171	654.428	255.525	638.741	30566.2	623.077	27.5072	594.524	138.356	9.036	46.8792	61.4873	2300	181.659	14.3509	29.4842	18.2458	3.71795	21.99	2704.58	714.93	15.3846	18.34	80.1912
2010	497.076	297.432	484.686	50.4977	1902.15	222.1	606.238	656.604	874.576	102.343	384.308	121.998	136.037	236.205	62.9465	137.588	106.012	153.327	484.663	74.5717	261.388	190.895	112.303	17.2146	287.5	99.4708	655.741	256.049	635.317	25981.2	675	27.5519	598.801	134.667	9.036	48.592	75.0193	2300	179.379	13.6333	29.4842	17.5484	4.02778	20.9429	2787.57	719.796	15.3846	17.9804	76.9903
2011	500.082	300.009	484.778	50.4977	1914.67	221.558	613.251	660.969	878.298	103.446	390.07	127.067	134.411	245.922	50.5444	135.5	103.442	153.548	507.887	73.3021	261.456	192.122	112.303	15.017	287.5	97.4188	654.72	256.84	634.778	25981.2	736.364	27.5818	605.333	134.667	9.036	48.1328	59.9691	2300	175.846	14.3509	28.01	17.5484	4.02778	20.4558	2690.21	800.126	15.3846	17.3019	77.6514
2012	502.92	302.631	486.119	50.4977	1918.28	222.326	620.428	669.875	878.298	102.76	411.469	127.417	132.821	245.468	50.6363	132.228	105.08	153.487	479.489	72.9225	261.489	193.022	112.236	15.017	287.5	95.0345	655.888	257.693	631.063	25981.2	810	27.6168	621.918	129.487	8.68846	47.2185	68.1754	2300	172.294	13.6333	25.4636	17.5484	4.02778	18.9161	2761.5	804.183	15.3846	17.3019	76.8204
2013	499.409	285.625	486.442	52.9474	1921.9	205.793	635.256	761.082	947.234	94.2223	445.775	161.5	123.292	286.575	53.0095	134.389	93.4025	144.272	500.806	83.1783	261.657	230.109	139.537	14.4041	287.5	95.1661	639.447	257.922	663.793	27150	852.632	25.1273	489.461	129.487	8.66667	46.3382	68.9286	1840	162.662	13.1935	23.3417	17.5484	4.02778	17.592	2706.65	809.156	15.3846	16.6727	81.5838
2014	499.854	284.627	486.377	52.9474	1929.18	205.915	635.256	680.758	947.234	93.6054	459.486	161.5	121.867	284.845	51.783	135.077	92.2401	144.056	508.175	82.9652	262.128	230.669	140.038	14.4041	287.5	96.3776	640.447	258.341	663.379	27150	900	24.6728	488.862	129.487	8.66667	46.7219	48.01	1840	162.335	13.6333	23.3417	17.5484	4.02778	16.9154	2748.22	797.445	15.3846	16.6727	87.9567
2015	500.111	283.635	486.523	52.9474	1936.98	206.314	635.256	669.054	935.294	92.9941	426.18	161.5	120.474	285.521	53.2314	140.077	92.5875	142.921	517.952	82.5983	262.331	230.857	140.175	14.4041	287.5	96.3776	641.594	259.416	659.545	27150	1012.5	24.6063	481.495	114.773	8.66667	47.2826	74.3451	1840	161.239	13.6333	23.3417	17.5484	4.02778	16.9154	2698.4	786.024	15.3846	16.6727	84.7458
2016	500.448	282.65	486.523	52.9474	1946.7	207.788	635.256	671.556	883.333	92.3955	396.265	161.5	119.115	289.275	55.062	139.728	93.2815	143.877	510.527	82.4838	263.553	228.921	141.271	14.4041	287.5	96.3776	642.025	259.727	639.32	27150	1157.14	24.5786	470.214	114.773	8.35714	47.0482	74.3451	1840	161.871	13.6333	23.3417	17.5484	4.02778	16.9154	2790.2	774.969	15.3846	16.6727	81.8078
Normalized Energy use (MJ per land use)	China	United States	India	Russian Federation	Japan	Germany	Islamic Republic of Iran	Saudi Arabia	Indonesia	Canada	Mexico	South Africa	Brazil	Turkey	Australia	United Kingdom	Poland	France	Italy	Kazakhstan	Afghanistan	Albania	Algeria	Angola	Antigua and Barbuda	Argentina	Armenia	Austria	Azerbaijan	Bahrain	Barbados	Belarus	Belgium	Belize	Benin	Bolivia	Botswana	Brunei	Bulgaria	Burkina Faso	Burundi	Cameroon	Central African Republic	Chad	Chile	Colombia	Comoros	Congo	Croatia
2000	35.4764	54.251	8.29029	20.7734	493.158	121.208	34.4968	133.788	20.7866	31.2621	25.5903	30.8656	17.695	12.9801	20.145	162.917	26.1659	60.2029	88.3677	4.45107	0.270691	17.0116	14.0925	3.88224	192.42	8.93652	23.1008	98.735	25.886	20155	167.328	14.9916	314.129	13.8544	0.983193	4.96168	13.7705	3542.4	22.0258	0.413514	0.60375	1.40968	0.297513	0.1033	63.0917	39.3405	2.42585	2.6089	40.7856
2001	37.2882	52.9616	8.36486	21.186	491.654	123.255	34.2457	142.236	22.3284	30.5198	25.0085	31.3151	17.1303	11.8169	19.7196	171.276	26.7628	60.9444	90.313	5.14699	0.209965	15.683	14.7552	4.21044	192.42	8.80425	22.3841	103.299	24.8178	20860	167.424	15.5577	317.849	14.1231	1.0872	4.22206	25.0668	4027.68	23.3506	0.37296	0.499569	1.39675	0.306653	0.0914769	63.5155	44.8153	2.53662	3.24661	42.3049
2002	40.4847	54.4807	8.74425	21.1729	492.965	121.849	36.8424	148.141	23.459	31.7167	25.7851	30.4647	17.3173	12.8072	20.4044	163.521	27.6426	60.2577	90.1515	5.45702	0.199833	16.9063	15.3569	4.34706	206.28	8.34724	21.4307	103.677	24.4827	22257.4	180.591	16.4344	321.493	12.5537	1.20311	4.40989	21.1327	4703.22	23.4477	0.371106	0.467708	1.38769	0.306653	0.0952541	69.722	49.1521	2.54769	2.88294	42.2039
2003	47.0683	55.3707	9.11647	21.7725	493.477	121.361	37.2554	156.922	22.6363	32.1203	25.4859	33.2559	17.4081	13.9248	21.153	169.561	29.5647	60.9425	96.941	6.01125	0.2335	19.9476	16.1621	4.53393	216.81	8.69875	23.6619	105.404	26.4665	27357.9	182.52	16.499	332.443	12.3017	1.34246	5.58359	26.7065	4865.76	24.3808	0.382024	0.369455	1.48856	0.295916	0.0916105	76.2535	49.693	3.26215	3.38253	43.9004
2004	54.9868	57.2034	9.78806	22.0289	501.429	120.52	40.4306	175.112	20.4599	32.772	27.3657	37.1098	18.0383	14.5785	19.7303	165.777	29.7029	61.3962	98.453	6.34574	0.215051	21.6978	16.8029	5.01545	224.91	8.53975	24.7387	107.227	29.9762	32117.8	198	18.6539	331.584	11.5663	1.41147	5.6919	23.0002	5403.24	23.6949	0.379017	0.429076	1.5576	0.313554	0.0965368	80.1341	51.157	3.57785	3.58163	46.4166
2005	62.3431	58.0003	10.3879	22.0706	512.551	119.001	42.9203	186.635	22.5372	33.3864	29.0201	35.489	18.327	14.9537	19.1637	170.216	31.5257	61.0259	101.078	6.64526	0.277161	23.052	17.5507	4.26502	228.33	8.5198	28.6758	108.944	32.4537	36030.5	199.551	18.6074	326.597	12.42	1.31589	5.2462	23.229	6086.88	26.7397	0.376163	0.376946	1.50363	0.324	0.101262	86.1406	56.6245	3.43938	4.94229	44.5596
2006	68.1544	58.3193	10.9731	23.0649	513.03	122.309	46.4273	196.576	24.4023	33.235	29.8527	37.8528	18.5615	17.2026	22.1454	158.065	32.4718	60.6432	106.113	7.01151	0.336536	19.7692	18.2739	5.38549	235.35	8.44905	28.4948	107.986	31.966	39768.8	199.994	19.7721	327.671	14.58	1.94141	5.63296	28.4776	9380.7	27.7472	0.385736	0.4684	1.81884	0.339668	0.102831	98.7952	67.5235	4.00431	5.96718	43.6413
2007	74.1178	59.9558	11.9788	23.2034	509.848	116.949	49.1981	205.366	25.5924	34.7579	29.809	38.8664	19.4493	19.1325	23.4973	153.606	33.8595	59.7418	107.103	7.8049	0.434503	15.6793	19.2605	6.01401	246.6	8.43958	31.8442	105.57	28.7184	42287.4	190.828	19.3812	330.838	13.644	2.3053	5.66851	31.7769	6565.2	27.2879	0.529641	0.794118	1.81986	0.343212	0.103754	107.976	64.5917	2.64185	7.39102	45.4821
2008	76.7253	58.9687	12.6617	23.2934	504.933	117.568	55.4493	231.124	24.4828	34.9804	31.1963	41.0198	20.0555	19.5817	23.0196	152.836	33.8055	59.9646	101.013	8.26797	0.757367	16.622	20.3583	7.05081	252.27	8.8686	30.8454	108.223	28.9006	51725.1	225	19.6204	334.532	12.528	2.34936	5.69038	21.44	6742.8	26.821	0.47238	0.4832	1.84872	0.348062	0.1044	102.946	76.173	2.69723	8.47102	44.6974
2009	79.9478	56.5308	13.6296	22.1287	461.888	110.124	57.2209	254.496	24.3976	33.4398	31.9872	41.3585	19.6497	20.027	20.1782	144.206	32.5262	56.6636	101.285	7.44939	1.2384	19.1557	21.5626	6.82839	264.33	8.94322	27.5936	104.75	25.3452	45093.2	212.04	18.5067	314.032	12.7677	2.59114	5.37664	17.5808	3354.93	23.1035	0.466295	0.457768	1.99005	0.343938	0.10755	100.971	74.907	3.28985	10.1491	43.6287
2010	85.9226	58.9492	14.3652	23.0122	493.505	115.703	58.0591	280.391	26.7853	34.5119	33.9525	42.1961	21.3623	21.0503	21.6013	149.719	38.6239	58.2031	103.444	8.01264	1.53341	22.3493	20.9897	7.19842	255.6	8.49672	31.489	108.52	24.8656	38747.7	221.4	19.682	336.753	14.3904	2.96986	5.66449	19.1551	3821.4	23.7238	0.46992	0.528632	2.18717	0.3822	0.111086	104.525	80.7221	3.90462	13.7838	42.4664
2011	93.2865	58.8944	15.2125	23.7697	471.599	111.176	61.3744	291.366	29.3559	36.4896	36.117	43.337	22.0707	23.4202	17.9716	139.391	37.8731	56.0298	105.882	8.67467	2.07918	16.5762	22.2863	6.62216	254.88	8.48116	33.3898	101.935	27.6391	38350.1	253.473	19.5924	317.297	12.0768	2.7553	5.58282	15.3144	3925.35	24.7402	0.559958	0.55548	2.30661	0.403	0.114112	109.669	93.8322	3.51138	16.1504	37.5561
2012	97.5708	57.8603	16.0422	23.8229	469.213	112.97	62.5777	313.052	30.9296	35.8834	38.3247	42.7993	22.1999	24.8151	17.785	137.695	37.301	55.9298	97.2378	8.94364	1.86114	16.958	24.3438	7.40413	261.9	8.50952	35.9671	107.276	28.3092	41260.9	262.08	21.1972	313.291	11.9538	2.49618	6.78	16.8429	3815.82	23.0353	0.63174	0.474218	2.12621	0.4182	0.105832	115.08	100.92	3.64985	16.6069	34.4268
2013	101.347	59.2051	16.6688	23.5164	465.951	115.746	67.0773	319.364	32.2137	36.7409	39.2708	42.9528	22.7709	24.6274	18.1577	135.857	37.8681	56.3361	96.5841	9.03487	1.51718	21.5988	25.787	7.51496	261.99	8.87826	34.9365	106.673	28.6755	45920	280.156	18.5666	316.231	13.4538	2.4552	6.76881	21.0883	2839.1	20.3088	0.737884	0.4896	1.94603	0.4186	0.099288	113.912	95.9892	4.35323	20.2111	38.8101
2014	103.797	59.6122	17.8072	23.5984	455.725	110.93	69.9967	306.196	30.1769	36.8952	40.2636	43.4983	23.0104	25.2754	17.9931	128.668	36.005	53.8422	92.6099	9.14487	1.37487	18.6129	28.2226	8.05261	267.84	8.94608	35.5881	102.401	29.2266	44818.4	257.2	18.8222	294.311	13.1354	2.6236	6.89961	15.8382	3192.98	21.569	0.71052	0.4254	2.5333	0.4234	0.0954692	113.44	99.7361	3.888	19.26	41.762
2015	104.836	58.8267	18.3938	23.1324	451.084	113.117	69.577	310.434	29.844	36.5542	37.302	42.0472	22.4392	27.7154	18.7741	134.929	36.5185	53.702	96.4807	8.99186	1.52609	19.7148	29.7897	8.32261	274.14	9.14746	32.6394	102.987	31.7694	45944.3	307.89	17.0571	294.037	12.8045	2.932	6.80959	29.3519	3476.02	22.7999	0.86256	0.4527	2.70197	0.4236	0.0967154	113.881	98.8758	4.19815	19.1599	38.2589
2016	106.224	58.5389	19.2227	23.6415	445.694	115.794	73.4859	315.698	28.9666	36.171	35.1217	44.1477	21.615	29.4905	19.5721	132.99	38.4119	53.1799	96.0218	9.12201	1.66455	22.8931	29.9904	7.64089	276.03	9.12295	33.9331	106.522	30.4981	45611.8	369.309	16.9468	309.317	12.6327	2.9754	7.37659	29.2035	3744.43	21.6709	0.85368	0.5109	2.7828	0.4352	0.0991385	123.547	102.888	4.39754	18.4497	38.3697
RIW (normalised land use per capita)	China	United States	India	Russian Federation	Japan	Germany	Islamic Republic of Iran	Saudi Arabia	Indonesia	Canada	Mexico	South Africa	Brazil	Turkey	Australia	United Kingdom	Poland	France	Italy	Kazakhstan	Afghanistan	Albania	Algeria	Angola	Antigua and Barbuda	Argentina	Armenia	Austria	Azerbaijan	Bahrain	Barbados	Belarus	Belgium	Belize	Benin	Bolivia	Botswana	Brunei	Bulgaria	Burkina Faso	Burundi	Cameroon	Central African Republic	Chad	Chile	Colombia	Comoros	Congo	Croatia
2000	947.741	6215.14	1523.13	8484.08	352.72	1435.81	2274.19	1738.3	969.204	13351.8	2315.98	3071.54	2600.14	3767.54	12255.5	997.75	3657.48	3013.24	1489.06	20263.4	3697.31	1871.14	2468.25	1829.77	526.205	7496.45	1465.99	1746.23	2268.22	30.0928	552.456	6145.53	840.873	2587.79	3466.38	3734.74	2129.82	60.0303	4315.7	3187.47	1504.97	3841.7	5301.58	4308.46	1140.63	711.078	1198.47	1566.79	1884.38
2001	945.535	6155.06	1491.4	8484.93	349.511	1434.49	2386.94	1697.9	942.044	13200.1	2308.22	3002.99	2597.41	3707.77	12465.9	955.858	3551.55	2990	1463.65	19759.8	3555.79	1888.78	2411.01	1770.36	518.054	7443.46	1491.47	1724.63	2263.17	28.672	550.459	5802.46	821.459	2548.39	3462.05	3671.23	1194.26	58.8176	4328.8	3767.4	1494.13	3741.62	5185.36	4494.1	1127.86	604.631	1169.3	1522.72	1983.89
2002	942.281	6013.97	1467.39	8496.87	346.738	1429.41	2382.26	1650.97	923.868	12951.2	2279.99	2968.52	2595.67	3683.15	12078	974.558	3403.05	2972.48	1452.36	19076.7	3397.23	1894.45	2369.16	1769.47	510.888	7394.03	1499.68	1713.69	2248.3	27.2055	512.023	5692.54	805.204	2667.91	3495.36	3774.53	1437.25	57.6731	4280.89	3823.28	1470.74	3643.57	5076.1	4102.34	1052	540.913	1141.39	1480.19	1994.34
2003	937.873	5885.1	1437.66	8472.88	344.274	1432.98	2377.61	1603.09	1017.02	12729.7	2294.51	2911.01	2594.97	3536.42	11681.1	948.739	3294.63	2948.8	1388.69	19011	3281.97	1901.56	2325.71	1821.04	504.414	7530.88	1507.65	1699.25	2232.79	21.831	510.336	5684.54	804.731	2598.13	3523.68	3945.73	1124.31	56.6102	4273.78	4030.15	1432.88	3547.44	4921.18	4053.8	946.393	545.754	1114.52	1438.25	2007.72
2004	933.753	5755.22	1413.58	8478.4	342.749	1441.9	2373.41	1513.01	1104.68	12507.3	2221.12	2812.34	2595.34	3562.25	12790	970.029	3302.58	2929.28	1383.19	18969.4	3160.96	1909.52	2291.99	1759.24	497.909	7995.17	1516.3	1687.84	2215.98	18.0757	472.24	5701.87	806.054	2531.61	3419.35	3946.39	1280.07	55.6432	4293.2	3530.16	1381.16	3453.21	4873.89	3903.53	936.624	531.895	1088.36	1395.83	1967.66
2005	930.163	5626.44	1389.36	8485.37	341.23	1443.44	2369.9	1469.59	1014.01	12286.4	2197.63	2751.64	2596.77	3509.39	12945.5	948.491	3181.15	2908.8	1342.09	18856.7	3042.38	1786.49	2265.78	1698.09	491.008	8458.48	1526.2	1678.09	2196.42	16.8698	470.464	5734.74	804.495	2466.53	3324.89	4122.48	1334.02	54.7774	4142.85	3650.74	1298.06	3362.58	4779.14	3862.67	896.017	475.055	1062.74	1352.55	2025.45
2006	927.576	5497.2	1361.34	8498.73	339.684	1440.46	2367.1	1408.26	937.562	12060.7	2172.09	2598.5	2599.49	3342.36	11705.5	1001.53	3242.68	2882.52	1268.58	18693.4	2948.58	1951.51	2220.5	1637.73	483.653	8870.99	1530.94	1665.57	2170.18	15.1291	468.507	5767.87	798.259	2402.78	3042.51	4156.27	1094.83	54.0157	4120.5	3398.61	1182.99	3272.12	4686.66	3729.51	825.461	440.87	1037.63	1308.36	2043.53
2007	922.288	5370.63	1335.54	8513.28	337.966	1443.72	2364.71	1368.3	946.749	11822.8	2154.34	2565.16	2605.42	3158.73	11103.1	992.295	3101.48	2856.49	1227.11	18497.1	2875.96	1946.12	2186.03	1626.38	476.043	9180.71	1541.63	1658.73	2160.51	13.5146	466.451	5772.44	789.595	2340.94	2956.9	4363.68	970.429	80.0075	4088.62	3438.11	1081.12	3183.61	4597.42	3605.09	763.451	456.816	1013.06	1264.15	1976.7
2008	919.422	5275.52	1315.89	8522.28	336.397	1453.17	2155.42	1289.76	964.03	11575.4	2070.56	2571.34	2612.03	3060.98	11291.8	971.573	3158.76	2837.86	1274.59	18195.6	2811.46	2069.68	2156.31	1567.14	468.401	8797.62	1549.03	1645.14	2122.69	10.7658	464.375	5789.26	788.051	2281.45	2874.58	4388.23	1456.43	79.0678	4121.42	4084.49	1107.54	3097.23	4516.35	3487.25	785.24	413.513	989.001	1221.49	1997.12
2009	916.302	5185.32	1296.88	8519.71	335.346	1458.44	2134.53	1200.14	989.018	11325.4	1973.97	2508.07	2619.16	2993.63	12512.4	971.317	3162.65	2821.36	1181.31	17783.2	2744.52	2080.26	2120.63	1776.65	461.116	8470.76	1556.04	1637.96	2094.5	11.4761	462.462	5831.64	778.03	2320	2794.95	4505.92	1617.61	104.192	4225.97	3764.59	1131.27	3013.15	4495.55	3460.16	775.782	396.648	965.463	1206.16	2016.87
2010	907.299	5098.79	1272.07	8515.89	334.348	1448.57	2086.43	1159.68	975.875	11082.8	1886.79	2447.04	2626.54	2956.57	11551.6	951.146	2846.53	2814.3	1187.97	17573.8	2670.16	2148.97	2085.19	1755.42	454.401	9311.7	1558.74	1630.68	2080.88	12.8943	425.334	5832.1	765.448	2325.84	2717.61	4276.22	1303.4	102.921	4307.97	3844.87	1095.02	3047.99	4103.25	3514.02	744.907	389.848	942.45	1193.34	2105.49
2011	897.533	5018.73	1255.54	8509.25	332.778	1479.29	2038.46	1117.53	958.729	10857.8	1833.17	2313.85	2634.08	2796.56	14187.5	958.285	2915.67	2796.7	1131.7	17624.1	2586.88	2140.99	2046.29	1940.49	448.164	9398.84	1561.6	1620.18	2055.69	12.5181	388.71	5836.48	747.4	2271.1	2642.47	4247.55	1607.62	101.603	4422.77	3544.35	1116.27	2965.6	4073.66	3478.69	764.206	347.329	919.938	1205.96	2094.79
2012	888.132	4939.2	1236.75	8494.94	332.683	1471.42	1990.74	1069.11	945.855	10812.3	1714.44	2271.26	2641.91	2756.35	13916.7	975.193	2870.23	2784.31	1195.5	17468	2499.89	2134.53	2007.95	1871.92	442.434	9525.73	1554.66	1607.48	2040.49	12.3082	352.485	5834.44	722.972	2307.69	2672.35	4261.07	1397.37	100.253	4540.17	3620.73	1189.71	2885.7	4057.33	3637.15	737.342	342.48	897.95	1175.11	2123.93
2013	882.299	4922.67	1221.4	8476.87	332.536	1472.62	1920.32	1020.88	933.257	10769.6	1658.29	2235.08	2649.87	2709.65	13499.1	977.011	2837	2773.65	1133.41	17254.9	2412.49	2131.54	1965.44	1883.47	437.082	9406.69	1546.81	1596.61	2044.54	12.167	334.159	5873.34	731.222	2256.19	2698.76	4274.18	1357.55	123.634	4788.64	3631.51	1257.82	2808.31	4046.82	3782.03	744.956	361.756	876.596	1189.77	2059.36
2014	877.062	4904.14	1207.65	8458.44	331.72	1465.63	1895.93	1109.42	921.103	10732.2	1588.38	2199.98	2658.02	2680.11	13614.2	964.904	2874.9	2764.67	1106.78	17046.3	2328.68	2130.76	1918.99	1818.74	432.143	9186.89	1536.53	1581.61	2020.43	11.9754	315.983	5976.14	728.875	2207.34	2624.71	4174.09	1924.72	122.02	4825.62	3411.8	1218.98	2733.46	4032.1	3805.74	725.943	363.377	855.95	1161.08	1917.95
2015	872.168	4885.46	1193.88	8442.17	330.735	1450.18	1871.14	1100.33	921.112	10722.4	1691.39	2166.6	2666.28	2629.59	13054.5	923.119	2866.02	2776.74	1086.93	16873.6	2256.38	2135.24	1878.3	1757.26	427.506	9088.39	1526.89	1557.5	2008.12	11.6631	280.383	5982.75	735.751	2438.13	2552.96	4062.66	1224.11	120.509	4889.53	3312.97	1181.1	2661.13	4006.08	3685.07	730.689	364.368	836.095	1132.6	2007.09
2016	866.874	4867.48	1180.94	8427.81	329.463	1428.32	1845.93	1071.74	963.471	10670.3	1797.32	2135.09	2674.58	2553.44	12424.9	918.437	2845.92	2751.02	1104.61	16658.5	2184.37	2156.74	1825.88	1698.88	423.16	8992.81	1520.36	1538.9	2048.61	11.2218	244.93	5981.98	749.597	2388.71	2575.41	4022.91	1201.88	119.104	4904.72	3217.78	1144.16	2591.26	3966.78	3571.02	697.345	364.546	817.002	1104.2	2093.74
RIW (GWP/land/capita)	China	United States	India	Russian Federation	Japan	Germany	Islamic Republic of Iran	Saudi Arabia	Indonesia	Canada	Mexico	South Africa	Brazil	Turkey	Australia	United Kingdom	Poland	France	Italy	Kazakhstan	Afghanistan	Albania	Algeria	Angola	Antigua and Barbuda	Argentina	Armenia	Austria	Azerbaijan	Bahrain	Barbados	Belarus	Belgium	Belize	Benin	Bolivia	Botswana	Brunei	Bulgaria	Burkina Faso	Burundi	Cameroon	Central African Republic	Chad	Chile	Colombia	Comoros	Congo	Croatia
2000	2.83007e-09	1.31262e-08	9.78636e-10	1.32672e-08	2.07024e-07	9.51006e-08	4.76462e-08	3.92768e-07	3.24416e-08	5.81678e-08	2.45517e-08	5.56148e-08	2.07325e-08	1.74507e-08	1.35273e-07	1.96366e-07	6.66047e-08	4.24629e-08	9.78062e-08	3.30734e-08	9.42673e-09	4.70468e-07	5.36693e-08	3.29034e-07	0.000200616	3.59471e-08	4.4378e-07	5.90818e-07	4.02422e-07	0.00180406	8.61831e-05	1.08945e-07	1.52593e-06	3.52536e-05	1.42648e-07	4.19201e-07	1.18748e-05	0.00280191	1.60997e-07	6.69858e-08	1.99879e-07	2.13664e-07	9.43065e-07	1.15424e-07	2.2064e-07	2.56149e-07	1.07792e-06	1.29011e-06	3.65733e-07
2001	2.91095e-09	1.28835e-08	9.10569e-10	1.28866e-08	2.10486e-07	9.9777e-08	4.55563e-08	3.90295e-07	3.84164e-08	7.10911e-08	2.37136e-08	6.10911e-08	2.3294e-08	1.52104e-08	1.49212e-07	2.05732e-07	6.65388e-08	3.77726e-08	9.87777e-08	3.40228e-08	8.11414e-09	5.10521e-07	5.2508e-08	2.82431e-07	0.00021046	3.70578e-08	4.5387e-07	6.75233e-07	4.00679e-07	0.00178411	8.68502e-05	1.01436e-07	1.55416e-06	4.3006e-05	1.06471e-07	4.06804e-07	1.65793e-05	0.00273796	1.67965e-07	4.68646e-08	1.44599e-07	2.07381e-07	8.47498e-07	8.98819e-08	2.31133e-07	3.15402e-07	1.16238e-06	1.68254e-06	3.96718e-07
2002	3.08324e-09	1.27062e-08	9.07339e-10	1.32727e-08	2.17556e-07	9.78962e-08	4.68137e-08	4.05368e-07	5.03826e-08	7.70651e-08	2.36271e-08	6.27582e-08	2.32467e-08	1.55249e-08	1.47608e-07	1.94534e-07	6.79686e-08	3.67738e-08	1.01028e-07	3.91676e-08	9.278e-09	5.51182e-07	5.50891e-08	3.0289e-07	0.000220321	3.6782e-08	4.28843e-07	6.87899e-07	4.03615e-07	0.00176972	9.24777e-05	1.16686e-07	1.48694e-06	5.21058e-05	1.05895e-07	4.10866e-07	3.55141e-05	0.00270343	1.65857e-07	4.59002e-08	1.53852e-07	2.00336e-07	7.78539e-07	1.02634e-07	2.46182e-07	3.41033e-07	1.16166e-06	1.41607e-06	4.20994e-07
2003	3.45948e-09	1.28268e-08	9.20098e-10	1.43957e-08	2.1932e-07	9.74336e-08	4.84073e-08	4.10037e-07	3.69246e-08	7.85739e-08	2.3964e-08	6.57763e-08	2.28366e-08	1.6477e-08	1.34176e-07	2.0061e-07	7.28101e-08	3.70042e-08	1.08689e-07	4.17535e-08	9.1172e-09	5.74308e-07	5.7125e-08	3.02738e-07	0.000233291	3.73906e-08	4.63894e-07	7.39931e-07	3.84981e-07	0.00204411	9.32145e-05	1.10488e-07	1.51545e-06	5.39244e-05	9.80959e-08	3.65585e-07	2.64364e-05	0.00280079	1.87403e-07	4.50893e-08	1.51753e-07	2.0277e-07	8.74133e-07	1.01542e-07	2.71846e-07	3.38513e-07	1.18706e-06	2.14449e-06	4.4646e-07
2004	3.90956e-09	1.31738e-08	9.58452e-10	1.38868e-08	2.17904e-07	9.48544e-08	5.06094e-08	4.32178e-07	4.00437e-08	7.53176e-08	2.40639e-08	7.08689e-08	2.28195e-08	1.63083e-08	1.28228e-07	1.92168e-07	7.35278e-08	3.64563e-08	1.0995e-07	4.53559e-08	8.45994e-09	5.80142e-07	5.80456e-08	3.12042e-07	0.000242731	3.68659e-08	4.96584e-07	7.32195e-07	3.89672e-07	0.00219961	0.000101154	1.13814e-07	1.48451e-06	3.55459e-05	9.47048e-08	4.09759e-07	7.57877e-06	0.00270148	1.84386e-07	5.00829e-08	1.36518e-07	1.94098e-07	7.80498e-07	1.01211e-07	2.91394e-07	3.39379e-07	1.18496e-06	2.33529e-06	4.48437e-07
2005	4.33692e-09	1.31831e-08	9.85531e-10	1.42598e-08	2.19857e-07	9.23444e-08	5.28776e-08	4.40709e-07	3.68407e-08	7.60705e-08	2.47459e-08	7.08721e-08	2.2404e-08	1.68953e-08	1.15599e-07	1.92002e-07	7.67729e-08	3.62161e-08	1.12487e-07	4.76176e-08	8.53511e-09	6.12278e-07	5.93242e-08	2.99076e-07	0.000248573	3.34909e-08	5.47742e-07	7.25518e-07	4.10917e-07	0.00228604	0.000102166	1.16716e-07	1.42526e-06	4.6713e-05	9.87499e-08	3.65842e-07	1.8352e-05	0.00266081	1.94306e-07	4.67404e-08	1.25838e-07	1.955e-07	7.94321e-07	1.00389e-07	3.02068e-07	3.65896e-07	1.33314e-06	2.88706e-06	4.31067e-07
2006	4.69422e-09	1.3054e-08	1.04746e-09	1.36818e-08	1.98702e-07	9.39345e-08	5.58738e-08	4.6173e-07	5.43954e-08	6.89429e-08	2.49422e-08	7.32985e-08	1.54384e-08	1.75831e-08	1.27105e-07	1.78441e-07	6.07677e-08	3.72795e-08	1.15634e-07	5.19203e-08	1.0067e-08	5.00673e-07	5.80704e-08	2.49434e-07	0.000290192	3.37912e-08	5.93365e-07	7.27284e-07	3.84699e-07	0.00236957	0.000104236	1.09695e-07	1.39258e-06	3.68753e-05	1.04176e-07	3.63404e-07	1.1265e-05	0.00287633	2.14816e-07	5.00022e-08	4.58591e-08	1.81931e-07	7.59323e-07	1.39593e-07	3.23662e-07	3.77769e-07	1.22797e-06	2.60038e-06	5.00773e-07
2007	5.05819e-09	1.35455e-08	1.11183e-09	1.35473e-08	2.0667e-07	9.09129e-08	5.79038e-08	4.75664e-07	4.02405e-08	6.99312e-08	2.52479e-08	7.56767e-08	1.55665e-08	2.01198e-08	1.30548e-07	1.7302e-07	6.35967e-08	3.65757e-08	1.16618e-07	5.31562e-08	1.17318e-08	5.27766e-07	6.00173e-08	2.76006e-07	0.000303477	3.22018e-08	6.46384e-07	7.04099e-07	3.69334e-07	0.0023485	0.000104055	1.05255e-07	1.33988e-06	4.68188e-05	1.06401e-07	3.57076e-07	2.45478e-05	0.00181528	2.38515e-07	4.79703e-08	4.02521e-08	1.81191e-07	7.64734e-07	1.36453e-07	3.82818e-07	3.64823e-07	1.00707e-06	2.28295e-06	5.60683e-07
2008	5.20468e-09	1.2847e-08	1.14429e-09	1.50684e-08	1.93099e-07	9.11121e-08	6.33494e-08	5.21206e-07	3.82278e-08	6.86158e-08	2.66933e-08	7.88368e-08	1.50992e-08	2.01796e-08	1.17174e-07	1.68188e-07	6.10652e-08	3.5922e-08	1.07796e-07	6.31069e-08	1.45279e-08	4.74453e-07	6.04504e-08	2.35843e-07	0.000313243	3.41323e-08	6.97928e-07	7.03644e-07	4.06829e-07	0.0027221	0.00011101	1.13554e-07	1.34182e-06	3.89243e-05	1.01369e-07	3.26922e-07	8.64044e-06	0.00178605	2.29113e-07	3.85984e-08	4.70364e-08	1.78287e-07	7.84835e-07	1.3103e-07	3.85608e-07	3.9209e-07	1.05337e-06	1.92814e-06	5.31897e-07
2009	5.53562e-09	1.20206e-08	1.22494e-09	1.31325e-08	1.82397e-07	8.52602e-08	6.4707e-08	5.53187e-07	4.395e-08	6.25317e-08	2.65499e-08	7.54586e-08	1.45561e-08	2.03443e-08	1.04955e-07	1.51002e-07	5.74687e-08	3.42994e-08	1.04083e-07	5.4559e-08	1.70462e-08	4.84615e-07	6.2869e-08	2.00628e-07	0.000328545	3.38206e-08	6.20229e-07	6.39099e-07	4.00963e-07	0.00229757	0.000110553	1.08376e-07	1.26099e-06	3.10407e-05	1.02183e-07	3.02316e-07	4.5812e-06	0.00130761	1.94746e-07	4.05774e-08	4.77576e-08	1.71396e-07	6.86539e-07	1.19808e-07	3.69741e-07	4.04928e-07	1.07401e-06	1.7195e-06	4.59581e-07
2010	6.02908e-09	1.2528e-08	1.26824e-09	1.38205e-08	1.92476e-07	8.92633e-08	6.52534e-08	5.9118e-07	3.59076e-08	6.90059e-08	2.70977e-08	7.63372e-08	1.53097e-08	2.06583e-08	1.03286e-07	1.55259e-07	6.85786e-08	3.43717e-08	1.04877e-07	5.92024e-08	1.96753e-08	4.85317e-07	6.19408e-08	1.95049e-07	0.000332281	2.91572e-08	6.06752e-07	6.87182e-07	4.19186e-07	0.00196235	0.000116672	1.16847e-07	1.33775e-06	3.84126e-05	1.02095e-07	3.93133e-07	7.30385e-06	0.00122798	2.00616e-07	3.86516e-08	4.75623e-08	1.59687e-07	7.86456e-07	1.13329e-07	3.98682e-07	4.08541e-07	1.15994e-06	1.97834e-06	4.25764e-07
2011	6.64872e-09	1.28005e-08	1.42683e-09	1.42499e-08	2.31895e-07	8.52344e-08	7.20231e-08	5.98527e-07	3.95246e-08	5.91045e-08	2.77913e-08	7.60891e-08	1.27267e-08	2.20211e-08	8.72505e-08	1.40325e-07	8.53475e-08	2.96022e-08	1.07195e-07	6.08736e-08	2.49824e-08	5.14103e-07	6.52973e-08	1.94032e-07	0.000302511	2.87546e-08	6.39249e-07	6.6481e-07	4.27861e-07	0.0019403	0.000126251	1.61349e-07	1.20298e-06	2.90297e-05	1.00118e-07	3.22117e-07	7.32936e-06	0.00111764	2.22343e-07	3.7429e-08	8.27156e-08	1.55015e-07	8.35602e-07	1.07672e-07	2.0796e-08	2.53931e-07	1.08868e-06	2.22989e-06	5.76537e-07
2012	6.8546e-09	1.22026e-08	1.48556e-09	1.45886e-08	2.41439e-07	8.68098e-08	7.27115e-08	6.25155e-07	3.9735e-08	6.07646e-08	2.85032e-08	7.82829e-08	1.28963e-08	2.25351e-08	8.5906e-08	1.41459e-07	8.5011e-08	2.97208e-08	9.73116e-08	5.97031e-08	2.76213e-08	4.9843e-07	6.75642e-08	1.57194e-07	0.000304173	2.88132e-08	7.09819e-07	6.40785e-07	4.27059e-07	0.00196547	0.000138527	1.69011e-07	1.22056e-06	1.2555e-05	9.33743e-08	3.0207e-07	5.88021e-06	0.00110843	1.95348e-07	3.51211e-08	7.11857e-08	1.49525e-07	7.99444e-07	9.7512e-08	1.17359e-08	2.50703e-07	1.10517e-06	2.05907e-06	5.19633e-07
2013	7.11787e-09	1.23211e-08	1.4944e-09	1.38266e-08	2.47204e-07	8.81287e-08	7.53866e-08	6.35296e-07	3.87745e-08	6.46786e-08	2.8522e-08	7.84003e-08	1.27772e-08	2.16016e-08	7.32967e-08	1.34692e-07	8.47977e-08	2.95989e-08	9.28196e-08	6.14133e-08	3.0368e-08	5.04321e-07	6.76621e-08	1.58656e-07	0.000303226	2.78451e-08	7.03012e-07	6.42723e-07	4.13565e-07	0.0020798	0.000145512	1.65387e-07	1.20436e-06	2.83322e-05	8.91073e-08	2.89639e-07	1.14872e-05	0.00086494	1.67396e-07	3.39533e-08	6.87435e-08	1.52704e-07	8.39464e-07	8.65479e-08	1.21733e-09	2.45622e-07	1.14113e-06	2.00353e-06	5.09426e-07
2014	7.1012e-09	1.22724e-08	1.56067e-09	1.38026e-08	2.41453e-07	8.36179e-08	7.54856e-08	5.93275e-07	4.55699e-08	6.07966e-08	2.85002e-08	7.95262e-08	1.29341e-08	2.26639e-08	7.16989e-08	1.24406e-07	8.06587e-08	2.67055e-08	8.86625e-08	5.69296e-08	3.33945e-08	5.34711e-07	7.01013e-08	1.38985e-07	0.000305201	2.79689e-08	6.98995e-07	6.07335e-07	4.09541e-07	0.00214715	0.000146289	1.64114e-07	1.13149e-06	1.29886e-05	8.84625e-08	2.89671e-07	4.08755e-06	0.000849259	1.77821e-07	3.42223e-08	6.4335e-08	1.44303e-07	8.40643e-07	7.98305e-08	2.48091e-08	2.50562e-07	1.11425e-06	1.23593e-06	5.29984e-07
2015	7.06403e-09	1.18792e-08	1.55039e-09	1.32168e-08	2.36924e-07	8.35945e-08	7.4024e-08	5.96759e-07	4.5192e-08	6.30512e-08	2.69901e-08	7.45355e-08	1.26482e-08	2.2761e-08	7.24324e-08	1.23815e-07	8.19571e-08	2.6941e-08	9.31944e-08	5.50197e-08	3.50047e-08	5.24854e-07	7.16839e-08	1.5079e-07	0.000360708	2.78305e-08	6.68021e-07	6.14495e-07	3.95079e-07	0.0021399	0.00018663	1.56284e-07	1.16072e-06	1.64032e-05	8.9021e-08	2.94933e-07	2.39493e-05	0.000799215	1.87595e-07	3.43077e-08	6.02853e-08	1.43648e-07	8.75774e-07	1.32017e-07	2.41589e-09	2.42714e-07	1.16756e-06	1.79306e-06	5.31498e-07
2016	7.02615e-09	1.14915e-08	1.5618e-09	1.3619e-08	2.37862e-07	8.3496e-08	7.42762e-08	5.88265e-07	3.3818e-08	5.60103e-08	2.51791e-08	7.37482e-08	1.21341e-08	2.43373e-08	7.13912e-08	1.16734e-07	8.5244e-08	2.69109e-08	9.10369e-08	5.47952e-08	3.53193e-08	5.15121e-07	6.99715e-08	1.27448e-07	0.000364975	2.82126e-08	7.21754e-07	6.11679e-07	3.79271e-07	0.00206333	0.000217438	1.49431e-07	1.11534e-06	1.49911e-05	8.71499e-08	3.08298e-07	1.24821e-05	0.000800381	1.76854e-07	3.45286e-08	6.14989e-08	1.4047e-07	9.27173e-07	1.34666e-07	1.61752e-08	2.74215e-07	1.16024e-06	1.81672e-06	5.19134e-07
RIW (water use/land/capita)	China	United States	India	Russian Federation	Japan	Germany	Islamic Republic of Iran	Saudi Arabia	Indonesia	Canada	Mexico	South Africa	Brazil	Turkey	Australia	United Kingdom	Poland	France	Italy	Kazakhstan	Afghanistan	Albania	Algeria	Angola	Antigua and Barbuda	Argentina	Armenia	Austria	Azerbaijan	Bahrain	Barbados	Belarus	Belgium	Belize	Benin	Bolivia	Botswana	Brunei	Bulgaria	Burkina Faso	Burundi	Cameroon	Central African Republic	Chad	Chile	Colombia	Comoros	Congo	Croatia
2000	3.65001e-07	1.13293e-06	3.76688e-07	3.60723e-07	1.49164e-05	3.89005e-06	9.28154e-06	2.92491e-05	3.08116e-06	3.24206e-06	3.20487e-06	2.12689e-06	7.14891e-07	2.54851e-06	4.66437e-06	4.0254e-06	2.19108e-06	2.89532e-06	8.69282e-06	4.96124e-06	1.27277e-05	9.31414e-05	2.54829e-06	1.35525e-06	0.00253236	3.11939e-06	0.00012546	3.1932e-05	6.85336e-05	0.0266171	0.00198884	2.91643e-06	7.62512e-05	0.000638103	8.48787e-07	7.54902e-06	3.44248e-05	0.013807	2.28721e-05	1.76161e-06	4.65077e-06	1.09774e-06	9.77793e-07	2.86366e-06	0.000115832	7.83597e-06	2.83662e-05	3.00177e-06	1.52433e-05
2001	3.60575e-07	1.12157e-06	3.71629e-07	3.63759e-07	1.4981e-05	3.88055e-06	8.6247e-06	2.84425e-05	3.08443e-06	3.20883e-06	3.12661e-06	2.1182e-06	6.96344e-07	2.51335e-06	4.46365e-06	4.16959e-06	2.25767e-06	2.87565e-06	8.8338e-06	5.10503e-06	1.22405e-05	9.40196e-05	2.54133e-06	1.31124e-06	0.00249314	3.07372e-06	0.00012485	3.20852e-05	6.76305e-05	0.0253604	0.00198165	3.12072e-06	7.75182e-05	0.000609201	7.99977e-07	7.3924e-06	5.91158e-05	0.0135281	2.3729e-05	1.40761e-06	4.47629e-06	1.06914e-06	9.56359e-07	2.54518e-06	0.000114535	8.93114e-06	2.76757e-05	2.91732e-06	1.5637e-05
2002	3.57004e-07	1.12678e-06	3.65159e-07	3.66605e-07	1.50307e-05	3.88126e-06	8.42831e-06	2.76564e-05	3.06088e-06	3.20015e-06	3.07959e-06	2.08931e-06	6.78754e-07	2.45666e-06	4.49589e-06	4.05511e-06	2.35837e-06	2.85084e-06	8.876e-06	5.2874e-06	1.17099e-05	9.4302e-05	2.5211e-06	1.22739e-06	0.00245865	3.02794e-06	0.000125538	3.19739e-05	6.70693e-05	0.0240632	0.00211602	3.22174e-06	7.83773e-05	0.000549915	7.45568e-07	6.92517e-06	4.74096e-05	0.0132648	2.50593e-05	1.3095e-06	4.30846e-06	1.04112e-06	9.36209e-07	2.58127e-06	0.000120173	9.68294e-06	2.70152e-05	2.83585e-06	1.55367e-05
2003	3.6696e-07	1.07348e-06	4.02995e-07	3.58755e-07	1.47763e-05	3.30898e-06	8.45578e-06	2.86973e-05	3.56951e-06	3.24159e-06	3.23821e-06	2.24275e-06	7.25846e-07	2.54234e-06	3.54911e-06	2.52203e-06	2.50166e-06	2.74925e-06	7.3659e-06	5.39786e-06	1.10678e-05	7.21727e-05	2.99173e-06	1.18025e-06	0.0029319	3.21466e-06	0.000205584	3.04966e-05	8.10522e-05	0.0289544	0.00210904	3.01147e-06	7.17561e-05	0.000535532	9.14726e-07	6.62724e-06	5.96675e-05	0.0130204	2.4004e-05	1.26746e-06	4.09499e-06	1.08655e-06	9.78004e-07	2.46934e-06	0.000149025	1.1989e-05	2.63792e-05	5.49302e-06	1.75088e-05
2004	3.64227e-07	1.07757e-06	3.9683e-07	3.6142e-07	1.4832e-05	3.28995e-06	8.26843e-06	2.86546e-05	3.19924e-06	3.23825e-06	3.25405e-06	2.26558e-06	7.08513e-07	2.45496e-06	3.1671e-06	2.43877e-06	2.49856e-06	2.72712e-06	7.30004e-06	5.33503e-06	1.054e-05	7.24749e-05	2.95678e-06	1.14019e-06	0.00289409	2.96474e-06	0.000206764	3.0324e-05	8.02497e-05	0.0307929	0.0022634	3.04356e-06	7.10209e-05	0.000521821	8.87644e-07	6.38978e-06	5.05753e-05	0.0127979	2.42588e-05	1.36468e-06	3.98735e-06	1.05769e-06	9.48635e-07	2.3778e-06	0.000147487	1.19576e-05	2.576e-05	5.33099e-06	1.78552e-05
2005	3.61357e-07	1.0821e-06	3.91191e-07	3.63889e-07	1.48953e-05	3.29016e-06	8.08926e-06	2.78322e-05	3.3934e-06	3.23478e-06	3.19701e-06	2.25894e-06	6.92079e-07	2.42686e-06	3.04756e-06	2.46013e-06	2.59622e-06	2.70523e-06	7.45007e-06	5.27236e-06	1.01732e-05	7.82629e-05	2.90898e-06	1.10056e-06	0.00285399	2.74486e-06	0.000208113	3.00876e-05	7.93258e-05	0.0287386	0.00225489	3.06774e-06	7.038e-05	0.000508406	8.60522e-07	5.90242e-06	4.67369e-05	0.0125988	2.55206e-05	1.24378e-06	3.97824e-06	1.0289e-06	9.30193e-07	2.2338e-06	0.000150991	1.30318e-05	2.51536e-05	5.16573e-06	1.73011e-05
2006	3.58341e-07	1.08639e-06	3.8709e-07	3.65704e-07	1.49441e-05	3.30442e-06	7.91795e-06	2.74494e-05	3.57379e-06	3.2294e-06	3.14175e-06	2.33237e-06	6.76444e-07	2.48529e-06	3.27239e-06	2.29584e-06	2.55018e-06	2.69209e-06	7.83454e-06	5.2071e-06	9.88743e-06	7.25547e-05	2.88223e-06	1.06144e-06	0.00281123	2.56461e-06	0.0002107	3.00152e-05	7.85401e-05	0.0275814	0.00224551	3.08769e-06	7.00004e-05	0.000495267	8.8744e-07	5.65289e-06	5.46858e-05	0.0124236	2.60518e-05	1.25852e-06	4.0908e-06	1.00122e-06	9.12194e-07	2.15679e-06	0.000160472	1.36849e-05	2.45594e-05	4.99695e-06	1.714e-05
2007	3.5665e-07	1.09104e-06	3.82836e-07	3.6633e-07	1.49856e-05	3.30578e-06	7.75319e-06	2.67324e-05	3.44663e-06	3.23101e-06	3.07488e-06	2.30244e-06	6.6104e-07	2.56778e-06	3.40712e-06	2.28141e-06	2.66918e-06	2.68321e-06	8.01792e-06	5.14334e-06	9.6439e-06	7.38639e-05	2.83824e-06	9.9299e-07	0.002767	2.42907e-06	0.000212922	2.99441e-05	7.71226e-05	0.0264293	0.00223565	3.11369e-06	6.97367e-05	0.000482521	8.62469e-07	5.20213e-06	5.91211e-05	0.00817854	2.66439e-05	1.17133e-06	4.19131e-06	9.74136e-07	8.94823e-07	2.08484e-06	0.000169838	1.28851e-05	2.39778e-05	4.8281e-06	1.77273e-05
2008	3.73949e-07	9.61577e-07	4.0116e-07	3.53768e-07	1.47636e-05	2.68541e-06	8.32207e-06	2.4155e-05	3.86143e-06	3.01442e-06	3.25368e-06	2.39965e-06	7.26014e-07	3.32768e-06	3.14207e-06	2.21312e-06	2.50028e-06	2.38596e-06	7.73778e-06	4.78503e-06	9.42761e-06	6.64679e-05	3.23917e-06	9.5682e-07	0.00336663	2.67324e-06	0.000224574	3.06527e-05	7.3428e-05	0.0310788	0.0022257	2.90165e-06	5.52481e-05	0.000470257	1.03899e-06	5.03476e-06	3.63542e-05	0.00808249	2.47007e-05	9.28086e-07	3.82991e-06	9.47705e-07	8.79044e-07	2.01669e-06	0.000161624	1.56693e-05	2.34083e-05	4.66518e-06	1.87714e-05
2009	3.71509e-07	9.61301e-07	3.95719e-07	3.53662e-07	1.48136e-05	2.6893e-06	8.21919e-06	2.45328e-05	3.66513e-06	3.01142e-06	3.31358e-06	2.39266e-06	7.10242e-07	3.31695e-06	2.72103e-06	2.18046e-06	2.49382e-06	2.37534e-06	8.27304e-06	4.64447e-06	9.2055e-06	6.70272e-05	3.18217e-06	7.83725e-07	0.00331427	2.72144e-06	0.000226595	3.06262e-05	7.13897e-05	0.0257926	0.00221654	2.89344e-06	5.50664e-05	0.000439708	1.01021e-06	4.74256e-06	3.14755e-05	0.00599105	2.4402e-05	9.4781e-07	3.511e-06	9.21977e-07	8.57139e-07	1.90222e-06	0.000160165	1.59761e-05	2.28512e-05	4.42419e-06	1.86267e-05
2010	3.71589e-07	9.61563e-07	3.92687e-07	3.53503e-07	1.48524e-05	2.71593e-06	8.21878e-06	2.39449e-05	3.61643e-06	3.00965e-06	3.36838e-06	2.38198e-06	6.95084e-07	3.26579e-06	2.85708e-06	2.19206e-06	2.78664e-06	2.35789e-06	8.17619e-06	4.56882e-06	8.9561e-06	6.55315e-05	3.12149e-06	7.37046e-07	0.00326601	2.4387e-06	0.0002279	3.06154e-05	7.01671e-05	0.0209381	0.00239251	2.90308e-06	5.49581e-05	0.000417618	9.82253e-07	4.83571e-06	3.77531e-05	0.00591798	2.42548e-05	8.73639e-07	3.39852e-06	8.627e-07	9.18165e-07	1.75223e-06	0.000163374	1.59167e-05	2.23065e-05	4.20719e-06	1.79238e-05
2011	3.72049e-07	9.62935e-07	3.87733e-07	3.53228e-07	1.49779e-05	2.75999e-06	8.21667e-06	2.33825e-05	3.58319e-06	3.01248e-06	3.37153e-06	2.4434e-06	6.80512e-07	3.34844e-06	2.2625e-06	2.14199e-06	2.71764e-06	2.34989e-06	8.55324e-06	4.42721e-06	8.68121e-06	6.61306e-05	3.06326e-06	6.20009e-07	0.00322118	2.36101e-06	0.000227607	3.06067e-05	6.92e-05	0.0203272	0.00260211	2.91157e-06	5.48395e-05	0.000407788	9.55096e-07	4.71291e-06	2.97554e-05	0.00584219	2.39301e-05	8.92361e-07	3.12667e-06	8.39379e-07	9.11543e-07	1.65487e-06	0.000156103	1.75225e-05	2.17737e-05	3.93686e-06	1.81402e-05
2012	3.72341e-07	9.6431e-07	3.84046e-07	3.52634e-07	1.50301e-05	2.76435e-06	8.21326e-06	2.29762e-05	3.53507e-06	2.96017e-06	3.50861e-06	2.41164e-06	6.66478e-07	3.28812e-06	2.22739e-06	2.07578e-06	2.76068e-06	2.33761e-06	8.05326e-06	4.34267e-06	8.39145e-06	6.65502e-05	3.00226e-06	5.98099e-07	0.00317999	2.27719e-06	0.000227405	3.05686e-05	6.7887e-05	0.0199865	0.00285513	2.91794e-06	5.59937e-05	0.000383098	8.93025e-07	4.55e-06	3.34267e-05	0.00576457	2.35829e-05	8.2271e-07	2.75402e-06	8.16764e-07	9.0789e-07	1.47959e-06	0.000158704	1.74535e-05	2.12533e-05	3.83617e-06	1.8001e-05
2013	3.67921e-07	9.03896e-07	3.79782e-07	3.68954e-07	1.50802e-05	2.55182e-06	8.30596e-06	2.53251e-05	3.76176e-06	2.6857e-06	3.75146e-06	3.00805e-06	6.13282e-07	3.77428e-06	2.29199e-06	2.09563e-06	2.45536e-06	2.18598e-06	8.31434e-06	4.88263e-06	8.10847e-06	7.94823e-05	3.65854e-06	5.53667e-07	0.00314153	2.25496e-06	0.000220683	3.04159e-05	7.04902e-05	0.0206459	0.0029991	2.65448e-06	4.38608e-05	0.000374549	8.66269e-07	4.39542e-06	3.34193e-05	0.00454971	2.23894e-05	7.72783e-07	2.44664e-06	7.94861e-07	9.05537e-07	1.33067e-06	0.000154036	1.74029e-05	2.07478e-05	3.60666e-06	1.91705e-05
2014	3.66389e-07	8.94206e-07	3.75406e-07	3.68151e-07	1.51575e-05	2.5427e-06	8.20047e-06	2.20189e-05	3.71277e-06	2.64143e-06	3.81775e-06	2.9608e-06	6.01028e-07	3.68817e-06	2.20581e-06	2.09089e-06	2.42662e-06	2.1724e-06	8.35963e-06	4.79892e-06	7.85503e-06	7.98411e-05	3.59776e-06	5.34637e-07	0.00310603	2.2587e-06	0.000219903	3.02282e-05	6.95725e-05	0.0203207	0.00315983	2.60413e-06	4.36131e-05	0.000366439	8.425e-07	4.36387e-06	2.29865e-05	0.00449033	2.24718e-05	7.75237e-07	2.37109e-06	7.73675e-07	9.02245e-07	1.23799e-06	0.000154751	1.69786e-05	2.02592e-05	3.5197e-06	2.07524e-05
2015	3.6472e-07	8.84603e-07	3.71348e-07	3.67443e-07	1.52349e-05	2.52568e-06	8.09323e-06	2.10941e-05	3.61979e-06	2.60466e-06	3.49734e-06	2.91588e-06	5.89196e-07	3.63584e-06	2.23511e-06	2.15118e-06	2.43738e-06	2.14763e-06	8.52868e-06	4.70838e-06	7.62289e-06	8.0139e-05	3.52837e-06	5.16565e-07	0.0030727	2.23448e-06	0.000219307	3.00156e-05	6.83513e-05	0.0197908	0.0035486	2.59297e-06	4.27077e-05	0.000317989	8.19469e-07	4.34993e-06	3.50566e-05	0.00443473	2.24629e-05	7.52781e-07	2.2974e-06	7.53202e-07	8.96422e-07	1.19874e-06	0.000150167	1.65407e-05	1.97892e-05	3.43336e-06	2.01603e-05
2016	3.62995e-07	8.75236e-07	3.67323e-07	3.66818e-07	1.5329e-05	2.52327e-06	7.98421e-06	2.06998e-05	3.37725e-06	2.55876e-06	3.21296e-06	2.87348e-06	5.77771e-07	3.62401e-06	2.27615e-06	2.12962e-06	2.45671e-06	2.1563e-06	8.42072e-06	4.63547e-06	7.44855e-06	7.95944e-05	3.48376e-06	4.99405e-07	0.00304146	2.21098e-06	0.000218663	2.97284e-05	6.55188e-05	0.0190421	0.00404884	2.58681e-06	4.14965e-05	0.000311544	7.6868e-07	4.26478e-06	3.44199e-05	0.00438304	2.27097e-05	7.31152e-07	2.22556e-06	7.33428e-07	8.87628e-07	1.16164e-06	0.000153232	1.60865e-05	1.93373e-05	3.34727e-06	1.95977e-05
RIW (MJ/land/capita)	China	United States	India	Russian Federation	Japan	Germany	Islamic Republic of Iran	Saudi Arabia	Indonesia	Canada	Mexico	South Africa	Brazil	Turkey	Australia	United Kingdom	Poland	France	Italy	Kazakhstan	Afghanistan	Albania	Algeria	Angola	Antigua and Barbuda	Argentina	Armenia	Austria	Azerbaijan	Bahrain	Barbados	Belarus	Belgium	Belize	Benin	Bolivia	Botswana	Brunei	Bulgaria	Burkina Faso	Burundi	Cameroon	Central African Republic	Chad	Chile	Colombia	Comoros	Congo	Croatia
2000	2.80969e-08	1.92269e-07	7.84638e-09	1.41704e-07	3.88794e-06	1.47435e-06	5.25678e-07	6.47449e-06	9.82754e-08	1.01878e-06	2.58749e-07	6.86395e-07	1.01236e-07	2.05251e-07	1.05179e-06	2.76634e-06	6.83922e-07	9.8835e-07	1.55189e-06	2.99058e-07	1.30266e-08	5.50709e-06	4.53979e-07	2.36787e-07	0.00253131	2.42374e-07	7.52569e-06	1.23241e-05	3.21622e-06	0.030326	0.000616275	1.50223e-06	3.0643e-05	5.60191e-05	1.43198e-07	5.89395e-07	8.37962e-06	0.0106326	2.69587e-06	3.56233e-08	9.46484e-08	9.08652e-08	8.17247e-08	1.23629e-08	4.11226e-06	9.92697e-07	4.47278e-06	8.34204e-07	9.12776e-06
2001	2.93181e-08	1.8585e-07	7.78127e-09	1.45133e-07	3.86675e-06	1.49672e-06	5.15367e-07	6.7084e-06	1.0413e-07	9.83847e-07	2.49342e-07	6.87168e-07	9.6674e-08	1.84086e-07	1.01579e-06	2.8971e-06	6.99716e-07	9.93269e-07	1.58516e-06	3.46404e-07	9.71745e-09	5.12489e-06	4.6914e-07	2.48466e-07	0.0024921	2.36193e-07	7.33739e-06	1.28445e-05	3.05969e-06	0.0299049	0.0006144	1.56697e-06	3.08994e-05	5.53709e-05	1.5363e-07	4.92068e-07	1.49681e-05	0.0118449	2.91549e-06	3.12242e-08	7.65559e-08	8.76866e-08	8.23889e-08	1.05412e-08	4.09352e-06	1.11326e-06	4.56318e-06	1.00891e-06	9.83916e-06
2002	3.16188e-08	1.89416e-07	7.99791e-09	1.45712e-07	3.86806e-06	1.47716e-06	5.4756e-07	6.7938e-06	1.07928e-07	1.01137e-06	2.53579e-07	6.6011e-07	9.64551e-08	1.96595e-07	1.03832e-06	2.75425e-06	7.23054e-07	9.74961e-07	1.57997e-06	3.67255e-07	8.84188e-09	5.54121e-06	4.82087e-07	2.48128e-07	0.00263465	2.21519e-07	7.06356e-06	1.28282e-05	2.99594e-06	0.0302761	0.000660479	1.66584e-06	3.11139e-05	4.78459e-05	1.64913e-07	5.04402e-07	1.23972e-05	0.0135625	2.99187e-06	3.01882e-08	6.97643e-08	8.48346e-08	8.0653e-08	1.05612e-08	4.4453e-06	1.20249e-06	4.47372e-06	8.70877e-07	9.8099e-06
2003	3.65324e-08	1.90862e-07	8.20178e-09	1.5052e-07	3.8638e-06	1.47043e-06	5.46884e-07	6.98776e-06	1.02748e-07	1.01505e-06	2.47241e-07	7.11826e-07	9.57493e-08	2.10696e-07	1.06321e-06	2.84271e-06	7.73853e-07	9.79076e-07	1.69142e-06	4.03196e-07	9.86027e-09	6.56254e-06	5.0093e-07	2.50196e-07	0.00273405	2.28386e-07	7.84043e-06	1.29785e-05	3.21426e-06	0.0351324	0.000665333	1.68413e-06	3.20392e-05	4.56591e-05	1.78505e-07	6.26959e-07	1.53981e-05	0.0137726	3.13566e-06	3.01885e-08	5.34732e-08	8.86004e-08	7.62439e-08	9.77292e-09	4.81105e-06	1.19789e-06	5.59344e-06	9.92841e-07	1.02013e-05
2004	4.24256e-08	1.95363e-07	8.66489e-09	1.52907e-07	3.92474e-06	1.46056e-06	5.86365e-07	7.56988e-06	9.16312e-08	1.02603e-06	2.61835e-07	7.84702e-07	9.80308e-08	2.17555e-07	9.80271e-07	2.7635e-06	7.77925e-07	9.79129e-07	1.70673e-06	4.22683e-07	8.69713e-09	7.16823e-06	5.13974e-07	2.67375e-07	0.00279962	2.21858e-07	8.24426e-06	1.31213e-05	3.60876e-06	0.0387034	0.000719257	1.91713e-06	3.18184e-05	4.18304e-05	1.82125e-07	6.27619e-07	1.30274e-05	0.0150327	3.07054e-06	2.90868e-08	6.01647e-08	9.02471e-08	7.91829e-08	9.91671e-09	5.0037e-06	1.21583e-06	5.99075e-06	1.02027e-06	1.0783e-05
2005	4.78194e-08	1.96267e-07	9.05179e-09	1.53782e-07	4.01142e-06	1.44298e-06	6.15236e-07	7.8365e-06	9.95946e-08	1.03544e-06	2.73762e-07	7.41197e-07	9.84652e-08	2.2022e-07	9.39638e-07	2.81808e-06	8.26027e-07	9.65915e-07	1.74365e-06	4.38717e-07	1.08037e-08	7.65471e-06	5.29436e-07	2.19466e-07	0.0028028	2.19058e-07	9.61865e-06	1.32409e-05	3.86729e-06	0.0405217	0.000722165	1.92545e-06	3.1168e-05	4.37632e-05	1.64852e-07	5.68244e-07	1.29116e-05	0.0166712	3.49129e-06	2.8026e-08	5.11816e-08	8.47909e-08	8.02302e-08	1.00292e-08	5.323e-06	1.32773e-06	5.62334e-06	1.36423e-06	1.03383e-05
2006	5.19858e-08	1.95453e-07	9.41507e-09	1.61237e-07	4.01263e-06	1.48476e-06	6.58032e-07	8.02408e-06	1.06412e-07	1.02038e-06	2.77544e-07	7.8064e-07	9.86434e-08	2.50195e-07	1.06993e-06	2.59775e-06	8.51356e-07	9.53189e-07	1.82501e-06	4.58027e-07	1.27316e-08	6.60614e-06	5.43203e-07	2.67271e-07	0.00284569	2.15044e-07	9.63212e-06	1.30597e-05	3.76755e-06	0.0414942	0.000720758	2.05853e-06	3.10649e-05	5.00465e-05	2.3627e-07	5.99542e-07	1.55115e-05	0.0253352	3.65046e-06	2.78929e-08	6.1568e-08	9.98062e-08	8.24824e-08	9.83356e-09	6.04086e-06	1.56301e-06	6.39232e-06	1.59331e-06	1.01229e-05
2007	5.624e-08	1.99036e-07	1.0124e-08	1.62483e-07	3.98316e-06	1.42159e-06	6.89663e-07	8.15442e-06	1.10135e-07	1.05682e-06	2.7305e-07	7.91259e-07	1.02295e-07	2.74964e-07	1.12818e-06	2.50489e-06	8.8822e-07	9.33229e-07	1.83276e-06	5.04056e-07	1.6033e-08	5.2792e-06	5.63716e-07	2.87678e-07	0.00293481	2.12668e-07	1.08586e-05	1.27262e-05	3.34663e-06	0.0408211	0.000684706	2.02712e-06	3.11357e-05	4.56283e-05	2.72661e-07	5.93037e-07	1.69435e-05	0.0175088	3.61652e-06	3.71625e-08	1.01004e-07	9.71615e-08	8.1756e-08	9.59083e-09	6.53205e-06	1.4768e-06	4.11746e-06	1.90681e-06	1.05522e-05
2008	5.79209e-08	1.93916e-07	1.05455e-08	1.63185e-07	3.94285e-06	1.43184e-06	7.68841e-07	8.92764e-06	1.03974e-07	1.05213e-06	2.81516e-07	8.2403e-07	1.04439e-07	2.78075e-07	1.08332e-06	2.47279e-06	8.86684e-07	9.31489e-07	1.71712e-06	5.27496e-07	2.73198e-08	5.6397e-06	5.86177e-07	3.24988e-07	0.00295409	2.21272e-07	1.06085e-05	1.30052e-05	3.29788e-06	0.0464052	0.000803726	2.05924e-06	3.12356e-05	4.08314e-05	2.70137e-07	5.85342e-07	1.11921e-05	0.0177713	3.57969e-06	3.21572e-08	5.94627e-08	9.60241e-08	8.14492e-08	9.33511e-09	6.16138e-06	1.72123e-06	4.10394e-06	2.11169e-06	1.03713e-05
2009	6.00542e-08	1.84277e-07	1.11926e-08	1.54979e-07	3.60718e-06	1.34458e-06	7.84655e-07	9.55664e-06	1.02244e-07	9.94376e-07	2.84422e-07	8.19353e-07	1.01347e-07	2.80799e-07	9.30227e-07	2.31558e-06	8.52552e-07	8.75694e-07	1.71393e-06	4.62901e-07	4.36137e-08	6.54331e-06	6.10253e-07	3.03291e-07	0.00304717	2.20914e-07	9.55426e-06	1.2555e-05	2.83274e-06	0.0380509	0.000754312	1.94669e-06	2.90865e-05	4.05767e-05	2.89684e-07	5.43931e-07	8.99963e-06	0.00873894	3.10346e-06	3.07966e-08	5.45114e-08	1.00559e-07	7.92919e-08	9.30351e-09	5.9795e-06	1.6739e-06	4.8865e-06	2.44829e-06	1.0134e-05
2010	6.42314e-08	1.90576e-07	1.16386e-08	1.61094e-07	3.8534e-06	1.41486e-06	7.87108e-07	1.02252e-05	1.10759e-07	1.01491e-06	2.97586e-07	8.23871e-07	1.09151e-07	2.91043e-07	9.80462e-07	2.38534e-06	1.01527e-06	8.95054e-07	1.74509e-06	4.90914e-07	5.254e-08	7.67222e-06	5.83413e-07	3.08201e-07	0.00290362	2.08312e-07	1.09439e-05	1.29756e-05	2.74627e-06	0.0312265	0.000784742	2.07385e-06	3.09073e-05	4.46264e-05	3.22836e-07	5.6371e-07	9.63968e-06	0.0098326	3.20783e-06	3.0113e-08	6.09331e-08	1.07524e-07	8.71256e-08	9.29421e-09	6.12599e-06	1.78499e-06	5.66139e-06	3.22523e-06	9.88642e-06
2011	6.94029e-08	1.89033e-07	1.21672e-08	1.66267e-07	3.68918e-06	1.38494e-06	8.22328e-07	1.03074e-05	1.19763e-07	1.06262e-06	3.12173e-07	8.33337e-07	1.11742e-07	3.18886e-07	8.04456e-07	2.20351e-06	9.95005e-07	8.57474e-07	1.78314e-06	5.23922e-07	6.90359e-08	5.70571e-06	6.07895e-07	2.7341e-07	0.0028557	2.05547e-07	1.16076e-05	1.21473e-05	3.01306e-06	0.0300044	0.000895704	2.0682e-06	2.87452e-05	3.65701e-05	2.91232e-07	5.46641e-07	7.5987e-06	0.00997071	3.36678e-06	3.48191e-08	6.20066e-08	1.10331e-07	9.12046e-08	9.23159e-09	6.36367e-06	2.0549e-06	4.96963e-06	3.67486e-06	8.77352e-06
2012	7.22375e-08	1.84368e-07	1.26737e-08	1.66359e-07	3.67638e-06	1.40465e-06	8.28406e-07	1.07375e-05	1.24489e-07	1.03368e-06	3.26796e-07	8.10071e-07	1.11397e-07	3.32406e-07	7.82327e-07	2.16161e-06	9.79977e-07	8.51811e-07	1.63316e-06	5.3261e-07	5.97259e-08	5.84677e-06	6.51186e-07	2.94892e-07	0.00289684	2.03902e-07	1.24703e-05	1.27255e-05	3.04538e-06	0.0317406	0.000923793	2.23966e-06	2.82068e-05	3.53664e-05	2.56565e-07	6.53325e-07	8.25816e-06	0.00956372	3.15298e-06	3.81227e-08	5.12891e-08	9.89611e-08	9.42653e-08	8.27801e-09	6.61364e-06	2.19031e-06	5.04212e-06	3.68207e-06	8.06709e-06
2013	7.46637e-08	1.87362e-07	1.30139e-08	1.6387e-07	3.65609e-06	1.43524e-06	8.77034e-07	1.06269e-05	1.27931e-07	1.04726e-06	3.30487e-07	8.00027e-07	1.13268e-07	3.24349e-07	7.85091e-07	2.11852e-06	9.95475e-07	8.53594e-07	1.60348e-06	5.30354e-07	4.70158e-08	7.4605e-06	6.76111e-07	2.88862e-07	0.00286278	2.10371e-07	1.20571e-05	1.25796e-05	3.04514e-06	0.0349194	0.000985437	1.9614e-06	2.83376e-05	3.8916e-05	2.45407e-07	6.42058e-07	1.02244e-05	0.00702017	2.79539e-06	4.32199e-08	5.13192e-08	8.81463e-08	9.41109e-08	7.5102e-09	6.48279e-06	2.06448e-06	5.8708e-06	4.37207e-06	9.11958e-06
2014	7.60823e-08	1.87283e-07	1.37443e-08	1.64083e-07	3.5806e-06	1.3698e-06	9.03583e-07	9.90381e-06	1.18281e-07	1.04114e-06	3.3454e-07	7.9746e-07	1.13484e-07	3.27267e-07	7.66455e-07	1.99169e-06	9.47208e-07	8.11951e-07	1.52346e-06	5.28963e-07	4.11997e-08	6.44244e-06	7.25075e-07	2.98889e-07	0.00289363	2.0966e-07	1.22195e-05	1.19819e-05	3.06517e-06	0.0335448	0.000903011	1.98661e-06	2.62566e-05	3.71722e-05	2.55044e-07	6.44431e-07	7.58312e-06	0.00779216	2.98577e-06	4.04026e-08	4.32128e-08	1.11688e-07	9.4844e-08	6.98714e-09	6.38777e-06	2.1235e-06	5.1199e-06	4.06589e-06	9.85328e-06
2015	7.64546e-08	1.83469e-07	1.40394e-08	1.60534e-07	3.54791e-06	1.38477e-06	8.86419e-07	9.78742e-06	1.15503e-07	1.02384e-06	3.06109e-07	7.59162e-07	1.09743e-07	3.5293e-07	7.88297e-07	2.07213e-06	9.61358e-07	8.06963e-07	1.58867e-06	5.12567e-07	4.43457e-08	6.84376e-06	7.4984e-07	2.98469e-07	0.00292991	2.12081e-07	1.11566e-05	1.19161e-05	3.29239e-06	0.0334908	0.00107909	1.79745e-06	2.60806e-05	3.54762e-05	2.77233e-07	6.26473e-07	1.38406e-05	0.00837782	3.17636e-06	4.76273e-08	4.4557e-08	1.15973e-07	9.42764e-08	6.85391e-09	6.33754e-06	2.08069e-06	5.40008e-06	3.94553e-06	9.10145e-06
2016	7.70481e-08	1.81268e-07	1.45131e-08	1.63787e-07	3.50955e-06	1.40615e-06	9.23607e-07	9.73096e-06	1.10748e-07	1.0017e-06	2.8477e-07	7.85495e-07	1.04844e-07	3.69454e-07	8.09067e-07	2.02693e-06	1.01164e-06	7.97013e-07	1.5838e-06	5.12644e-07	4.70437e-08	7.95975e-06	7.39565e-07	2.64918e-07	0.00292012	2.09288e-07	1.1557e-05	1.21925e-05	3.1255e-06	0.0319905	0.00129221	1.78359e-06	2.72973e-05	3.42908e-05	2.73674e-07	6.68666e-07	1.35205e-05	0.00891956	3.04033e-06	4.57826e-08	4.87128e-08	1.16306e-07	9.59079e-08	6.80818e-09	6.78489e-06	2.13572e-06	5.52738e-06	3.70401e-06	9.19177e-06
[truncated: 100 more columns]

## Sheet: 4. Weighted RIW GWP
RIW (GWP/land/capita)	China	United States	India	Russian Federation	Japan	Germany	Islamic Republic of Iran	Saudi Arabia	Indonesia	Canada	Mexico	South Africa	Brazil	Turkey	Australia	United Kingdom	Poland	France	Italy	Kazakhstan	Afghanistan	Albania	Algeria	Angola	Antigua and Barbuda	Argentina	Armenia	Austria	Azerbaijan	Bahrain	Barbados	Belarus	Belgium	Belize	Benin	Bolivia	Botswana	Brunei	Bulgaria	Burkina Faso	Burundi	Cameroon	Central African Republic	Chad	Chile	Colombia	Comoros	Congo	Croatia
2000	2.83007e-09	1.31262e-08	9.78636e-10	1.32672e-08	2.07024e-07	9.51006e-08	4.76462e-08	3.92768e-07	3.24416e-08	5.81678e-08	2.45517e-08	5.56148e-08	2.07325e-08	1.74507e-08	1.35273e-07	1.96366e-07	6.66047e-08	4.24629e-08	9.78062e-08	3.30734e-08	9.42673e-09	4.70468e-07	5.36693e-08	3.29034e-07	0.000200616	3.59471e-08	4.4378e-07	5.90818e-07	4.02422e-07	0.00180406	8.61831e-05	1.08945e-07	1.52593e-06	3.52536e-05	1.42648e-07	4.19201e-07	1.18748e-05	0.00280191	1.60997e-07	6.69858e-08	1.99879e-07	2.13664e-07	9.43065e-07	1.15424e-07	2.2064e-07	2.56149e-07	1.07792e-06	1.29011e-06	3.65733e-07
2001	2.91095e-09	1.28835e-08	9.10569e-10	1.28866e-08	2.10486e-07	9.9777e-08	4.55563e-08	3.90295e-07	3.84164e-08	7.10911e-08	2.37136e-08	6.10911e-08	2.3294e-08	1.52104e-08	1.49212e-07	2.05732e-07	6.65388e-08	3.77726e-08	9.87777e-08	3.40228e-08	8.11414e-09	5.10521e-07	5.2508e-08	2.82431e-07	0.00021046	3.70578e-08	4.5387e-07	6.75233e-07	4.00679e-07	0.00178411	8.68502e-05	1.01436e-07	1.55416e-06	4.3006e-05	1.06471e-07	4.06804e-07	1.65793e-05	0.00273796	1.67965e-07	4.68646e-08	1.44599e-07	2.07381e-07	8.47498e-07	8.98819e-08	2.31133e-07	3.15402e-07	1.16238e-06	1.68254e-06	3.96718e-07
2002	3.08324e-09	1.27062e-08	9.07339e-10	1.32727e-08	2.17556e-07	9.78962e-08	4.68137e-08	4.05368e-07	5.03826e-08	7.70651e-08	2.36271e-08	6.27582e-08	2.32467e-08	1.55249e-08	1.47608e-07	1.94534e-07	6.79686e-08	3.67738e-08	1.01028e-07	3.91676e-08	9.278e-09	5.51182e-07	5.50891e-08	3.0289e-07	0.000220321	3.6782e-08	4.28843e-07	6.87899e-07	4.03615e-07	0.00176972	9.24777e-05	1.16686e-07	1.48694e-06	5.21058e-05	1.05895e-07	4.10866e-07	3.55141e-05	0.00270343	1.65857e-07	4.59002e-08	1.53852e-07	2.00336e-07	7.78539e-07	1.02634e-07	2.46182e-07	3.41033e-07	1.16166e-06	1.41607e-06	4.20994e-07
2003	3.45948e-09	1.28268e-08	9.20098e-10	1.43957e-08	2.1932e-07	9.74336e-08	4.84073e-08	4.10037e-07	3.69246e-08	7.85739e-08	2.3964e-08	6.57763e-08	2.28366e-08	1.6477e-08	1.34176e-07	2.0061e-07	7.28101e-08	3.70042e-08	1.08689e-07	4.17535e-08	9.1172e-09	5.74308e-07	5.7125e-08	3.02738e-07	0.000233291	3.73906e-08	4.63894e-07	7.39931e-07	3.84981e-07	0.00204411	9.32145e-05	1.10488e-07	1.51545e-06	5.39244e-05	9.80959e-08	3.65585e-07	2.64364e-05	0.00280079	1.87403e-07	4.50893e-08	1.51753e-07	2.0277e-07	8.74133e-07	1.01542e-07	2.71846e-07	3.38513e-07	1.18706e-06	2.14449e-06	4.4646e-07
2004	3.90956e-09	1.31738e-08	9.58452e-10	1.38868e-08	2.17904e-07	9.48544e-08	5.06094e-08	4.32178e-07	4.00437e-08	7.53176e-08	2.40639e-08	7.08689e-08	2.28195e-08	1.63083e-08	1.28228e-07	1.92168e-07	7.35278e-08	3.64563e-08	1.0995e-07	4.53559e-08	8.45994e-09	5.80142e-07	5.80456e-08	3.12042e-07	0.000242731	3.68659e-08	4.96584e-07	7.32195e-07	3.89672e-07	0.00219961	0.000101154	1.13814e-07	1.48451e-06	3.55459e-05	9.47048e-08	4.09759e-07	7.57877e-06	0.00270148	1.84386e-07	5.00829e-08	1.36518e-07	1.94098e-07	7.80498e-07	1.01211e-07	2.91394e-07	3.39379e-07	1.18496e-06	2.33529e-06	4.48437e-07
2005	4.33692e-09	1.31831e-08	9.85531e-10	1.42598e-08	2.19857e-07	9.23444e-08	5.28776e-08	4.40709e-07	3.68407e-08	7.60705e-08	2.47459e-08	7.08721e-08	2.2404e-08	1.68953e-08	1.15599e-07	1.92002e-07	7.67729e-08	3.62161e-08	1.12487e-07	4.76176e-08	8.53511e-09	6.12278e-07	5.93242e-08	2.99076e-07	0.000248573	3.34909e-08	5.47742e-07	7.25518e-07	4.10917e-07	0.00228604	0.000102166	1.16716e-07	1.42526e-06	4.6713e-05	9.87499e-08	3.65842e-07	1.8352e-05	0.00266081	1.94306e-07	4.67404e-08	1.25838e-07	1.955e-07	7.94321e-07	1.00389e-07	3.02068e-07	3.65896e-07	1.33314e-06	2.88706e-06	4.31067e-07
2006	4.69422e-09	1.3054e-08	1.04746e-09	1.36818e-08	1.98702e-07	9.39345e-08	5.58738e-08	4.6173e-07	5.43954e-08	6.89429e-08	2.49422e-08	7.32985e-08	1.54384e-08	1.75831e-08	1.27105e-07	1.78441e-07	6.07677e-08	3.72795e-08	1.15634e-07	5.19203e-08	1.0067e-08	5.00673e-07	5.80704e-08	2.49434e-07	0.000290192	3.37912e-08	5.93365e-07	7.27284e-07	3.84699e-07	0.00236957	0.000104236	1.09695e-07	1.39258e-06	3.68753e-05	1.04176e-07	3.63404e-07	1.1265e-05	0.00287633	2.14816e-07	5.00022e-08	4.58591e-08	1.81931e-07	7.59323e-07	1.39593e-07	3.23662e-07	3.77769e-07	1.22797e-06	2.60038e-06	5.00773e-07
2007	5.05819e-09	1.35455e-08	1.11183e-09	1.35473e-08	2.0667e-07	9.09129e-08	5.79038e-08	4.75664e-07	4.02405e-08	6.99312e-08	2.52479e-08	7.56767e-08	1.55665e-08	2.01198e-08	1.30548e-07	1.7302e-07	6.35967e-08	3.65757e-08	1.16618e-07	5.31562e-08	1.17318e-08	5.27766e-07	6.00173e-08	2.76006e-07	0.000303477	3.22018e-08	6.46384e-07	7.04099e-07	3.69334e-07	0.0023485	0.000104055	1.05255e-07	1.33988e-06	4.68188e-05	1.06401e-07	3.57076e-07	2.45478e-05	0.00181528	2.38515e-07	4.79703e-08	4.02521e-08	1.81191e-07	7.64734e-07	1.36453e-07	3.82818e-07	3.64823e-07	1.00707e-06	2.28295e-06	5.60683e-07
2008	5.20468e-09	1.2847e-08	1.14429e-09	1.50684e-08	1.93099e-07	9.11121e-08	6.33494e-08	5.21206e-07	3.82278e-08	6.86158e-08	2.66933e-08	7.88368e-08	1.50992e-08	2.01796e-08	1.17174e-07	1.68188e-07	6.10652e-08	3.5922e-08	1.07796e-07	6.31069e-08	1.45279e-08	4.74453e-07	6.04504e-08	2.35843e-07	0.000313243	3.41323e-08	6.97928e-07	7.03644e-07	4.06829e-07	0.0027221	0.00011101	1.13554e-07	1.34182e-06	3.89243e-05	1.01369e-07	3.26922e-07	8.64044e-06	0.00178605	2.29113e-07	3.85984e-08	4.70364e-08	1.78287e-07	7.84835e-07	1.3103e-07	3.85608e-07	3.9209e-07	1.05337e-06	1.92814e-06	5.31897e-07
2009	5.53562e-09	1.20206e-08	1.22494e-09	1.31325e-08	1.82397e-07	8.52602e-08	6.4707e-08	5.53187e-07	4.395e-08	6.25317e-08	2.65499e-08	7.54586e-08	1.45561e-08	2.03443e-08	1.04955e-07	1.51002e-07	5.74687e-08	3.42994e-08	1.04083e-07	5.4559e-08	1.70462e-08	4.84615e-07	6.2869e-08	2.00628e-07	0.000328545	3.38206e-08	6.20229e-07	6.39099e-07	4.00963e-07	0.00229757	0.000110553	1.08376e-07	1.26099e-06	3.10407e-05	1.02183e-07	3.02316e-07	4.5812e-06	0.00130761	1.94746e-07	4.05774e-08	4.77576e-08	1.71396e-07	6.86539e-07	1.19808e-07	3.69741e-07	4.04928e-07	1.07401e-06	1.7195e-06	4.59581e-07
2010	6.02908e-09	1.2528e-08	1.26824e-09	1.38205e-08	1.92476e-07	8.92633e-08	6.52534e-08	5.9118e-07	3.59076e-08	6.90059e-08	2.70977e-08	7.63372e-08	1.53097e-08	2.06583e-08	1.03286e-07	1.55259e-07	6.85786e-08	3.43717e-08	1.04877e-07	5.92024e-08	1.96753e-08	4.85317e-07	6.19408e-08	1.95049e-07	0.000332281	2.91572e-08	6.06752e-07	6.87182e-07	4.19186e-07	0.00196235	0.000116672	1.16847e-07	1.33775e-06	3.84126e-05	1.02095e-07	3.93133e-07	7.30385e-06	0.00122798	2.00616e-07	3.86516e-08	4.75623e-08	1.59687e-07	7.86456e-07	1.13329e-07	3.98682e-07	4.08541e-07	1.15994e-06	1.97834e-06	4.25764e-07
2011	6.64872e-09	1.28005e-08	1.42683e-09	1.42499e-08	2.31895e-07	8.52344e-08	7.20231e-08	5.98527e-07	3.95246e-08	5.91045e-08	2.77913e-08	7.60891e-08	1.27267e-08	2.20211e-08	8.72505e-08	1.40325e-07	8.53475e-08	2.96022e-08	1.07195e-07	6.08736e-08	2.49824e-08	5.14103e-07	6.52973e-08	1.94032e-07	0.000302511	2.87546e-08	6.39249e-07	6.6481e-07	4.27861e-07	0.0019403	0.000126251	1.61349e-07	1.20298e-06	2.90297e-05	1.00118e-07	3.22117e-07	7.32936e-06	0.00111764	2.22343e-07	3.7429e-08	8.27156e-08	1.55015e-07	8.35602e-07	1.07672e-07	2.0796e-08	2.53931e-07	1.08868e-06	2.22989e-06	5.76537e-07
2012	6.8546e-09	1.22026e-08	1.48556e-09	1.45886e-08	2.41439e-07	8.68098e-08	7.27115e-08	6.25155e-07	3.9735e-08	6.07646e-08	2.85032e-08	7.82829e-08	1.28963e-08	2.25351e-08	8.5906e-08	1.41459e-07	8.5011e-08	2.97208e-08	9.73116e-08	5.97031e-08	2.76213e-08	4.9843e-07	6.75642e-08	1.57194e-07	0.000304173	2.88132e-08	7.09819e-07	6.40785e-07	4.27059e-07	0.00196547	0.000138527	1.69011e-07	1.22056e-06	1.2555e-05	9.33743e-08	3.0207e-07	5.88021e-06	0.00110843	1.95348e-07	3.51211e-08	7.11857e-08	1.49525e-07	7.99444e-07	9.7512e-08	1.17359e-08	2.50703e-07	1.10517e-06	2.05907e-06	5.19633e-07
2013	7.11787e-09	1.23211e-08	1.4944e-09	1.38266e-08	2.47204e-07	8.81287e-08	7.53866e-08	6.35296e-07	3.87745e-08	6.46786e-08	2.8522e-08	7.84003e-08	1.27772e-08	2.16016e-08	7.32967e-08	1.34692e-07	8.47977e-08	2.95989e-08	9.28196e-08	6.14133e-08	3.0368e-08	5.04321e-07	6.76621e-08	1.58656e-07	0.000303226	2.78451e-08	7.03012e-07	6.42723e-07	4.13565e-07	0.0020798	0.000145512	1.65387e-07	1.20436e-06	2.83322e-05	8.91073e-08	2.89639e-07	1.14872e-05	0.00086494	1.67396e-07	3.39533e-08	6.87435e-08	1.52704e-07	8.39464e-07	8.65479e-08	1.21733e-09	2.45622e-07	1.14113e-06	2.00353e-06	5.09426e-07
2014	7.1012e-09	1.22724e-08	1.56067e-09	1.38026e-08	2.41453e-07	8.36179e-08	7.54856e-08	5.93275e-07	4.55699e-08	6.07966e-08	2.85002e-08	7.95262e-08	1.29341e-08	2.26639e-08	7.16989e-08	1.24406e-07	8.06587e-08	2.67055e-08	8.86625e-08	5.69296e-08	3.33945e-08	5.34711e-07	7.01013e-08	1.38985e-07	0.000305201	2.79689e-08	6.98995e-07	6.07335e-07	4.09541e-07	0.00214715	0.000146289	1.64114e-07	1.13149e-06	1.29886e-05	8.84625e-08	2.89671e-07	4.08755e-06	0.000849259	1.77821e-07	3.42223e-08	6.4335e-08	1.44303e-07	8.40643e-07	7.98305e-08	2.48091e-08	2.50562e-07	1.11425e-06	1.23593e-06	5.29984e-07
2015	7.06403e-09	1.18792e-08	1.55039e-09	1.32168e-08	2.36924e-07	8.35945e-08	7.4024e-08	5.96759e-07	4.5192e-08	6.30512e-08	2.69901e-08	7.45355e-08	1.26482e-08	2.2761e-08	7.24324e-08	1.23815e-07	8.19571e-08	2.6941e-08	9.31944e-08	5.50197e-08	3.50047e-08	5.24854e-07	7.16839e-08	1.5079e-07	0.000360708	2.78305e-08	6.68021e-07	6.14495e-07	3.95079e-07	0.0021399	0.00018663	1.56284e-07	1.16072e-06	1.64032e-05	8.9021e-08	2.94933e-07	2.39493e-05	0.000799215	1.87595e-07	3.43077e-08	6.02853e-08	1.43648e-07	8.75774e-07	1.32017e-07	2.41589e-09	2.42714e-07	1.16756e-06	1.79306e-06	5.31498e-07
2016	7.02615e-09	1.14915e-08	1.5618e-09	1.3619e-08	2.37862e-07	8.3496e-08	7.42762e-08	5.88265e-07	3.3818e-08	5.60103e-08	2.51791e-08	7.37482e-08	1.21341e-08	2.43373e-08	7.13912e-08	1.16734e-07	8.5244e-08	2.69109e-08	9.10369e-08	5.47952e-08	3.53193e-08	5.15121e-07	6.99715e-08	1.27448e-07	0.000364975	2.82126e-08	7.21754e-07	6.11679e-07	3.79271e-07	0.00206333	0.000217438	1.49431e-07	1.11534e-06	1.49911e-05	8.71499e-08	3.08298e-07	1.24821e-05	0.000800381	1.76854e-07	3.45286e-08	6.14989e-08	1.4047e-07	9.27173e-07	1.34666e-07	1.61752e-08	2.74215e-07	1.16024e-06	1.81672e-06	5.19134e-07
Beef eco-potential GWP (RIW weighted)	China	United States	India	Russian Federation	Japan	Germany	Islamic Republic of Iran	Saudi Arabia	Indonesia	Canada	Mexico	South Africa	Brazil	Turkey	Australia	United Kingdom	Poland	France	Italy	Kazakhstan	Afghanistan	Albania	Algeria	Angola	Antigua and Barbuda	Argentina	Armenia	Austria	Azerbaijan	Bahrain	Barbados	Belarus	Belgium	Belize	Benin	Bolivia	Botswana	Brunei	Bulgaria	Burkina Faso	Burundi	Cameroon	Central African Republic	Chad	Chile	Colombia	Comoros	Congo	Croatia
2000	176673803086	38091873354	510915443025	37686883751	2415183138	5257588421	10494006989	1273016912	15412294806	8595822808	20365184653	8990417215	24116770815	28652180388	3696217846	2546262948	7506983139	11774996735	5112152532	15117868167	53040657442	1062772385	9316318236	1519600192	2.49233e+06	13909326755	1126685114	8.46284e+08	1242476252	277152	5.8016e+06	4589453219	3.27669e+08	1.41829e+07	3505140150	1192745472	4.21059e+07	178449	3105651840	7464265798	2501518039	2340127359	5.30186e+08	4331848272	2266130803	1951989816	4.63858e+08	3.87565e+08	1367118563
2001	171765472824	38809457954	549107243168	38800004851	2375457838	5011176576	10975438054	1281083401	13015282105	7033231981	21084962135	8184504642	21464756532	32872317562	3350936533	2430347379	7514417639	13237108999	5061868953	14696006539	61620819898	9.79391e+08	9522352099	1770346114	2.37575e+06	13492449714	1101636972	740484625	1247882152	280251	5.75704e+06	4929194311	3.21717e+08	1.16263e+07	4696098551	1229092326	3.01581e+07	182618	2976811247	10669043569	3457829552	2411019494	5.89972e+08	5562853205	2163256672	1585280173	4.30151e+08	2.97171e+08	1260341796
2002	162167237389	39350915512	551062090059	37671433240	2298260143	5107449612	10680623453	1233448459	9924063338	6488022294	21162113370	7967080495	21508392006	32206245844	3387360410	2570239065	7356342597	13596640674	4949111291	12765662063	53890904366	9.07142e+08	9076204607	1650765736	2.26942e+06	13593610206	1165929046	7.26851e+08	1238805589	282531	5.40671e+06	4284989758	3.36262e+08	9.59585e+06	4721638249	1216943066	1.40789e+07	184950	3014638289	10893207014	3249879753	2495809429	6.42229e+08	4871702496	2031021413	1466133928	4.3042e+08	353088731	1187665795
2003	144530503989	38980998858	543420609957	34732706076	2279771226	5131701327	10329019947	1219402341	13541123182	6363433090	20864617508	7601524964	21894647358	30345399072	3726438982	2492399308	6867176800	13511985637	4600292288	11975040880	54841397322	8.70614e+08	8752731558	1651593037	2.14324e+06	13372339124	1077832857	6.75739e+08	1298763971	244605	5.36397e+06	4525389448	3.29934e+08	9.27225e+06	5097051343	1367671621	1.89133e+07	178521	2668051592	11089100876	3294827775	2465847995	5.71995e+08	4924091899	1839275723	1477046617	4.21208e+08	2.33155e+08	1119920704
2004	127891496962	37954075998	521674532428	36005480196	2294583787	5271237149	9879591938	1156931597	12486373370	6638557966	20778035347	7055282255	21911126615	30659292177	3899305074	2601890423	6800149983	13715062413	4547505524	11023922164	59102067934	8.61858e+08	8613910168	1602347238	2.0599e+06	13562666739	1006878761	6.82879e+08	1283129788	227313	4.94294e+06	4393135580	3.36812e+08	1.40663e+07	5279565707	1220228969	6.59737e+07	185084	2711705259	9983447268	3662522213	2576018209	6.40617e+08	4940186245	1715889750	1473277158	4.21955e+08	2.14106e+08	1114983547
2005	115289117309	37927413105	507340674979	35063725650	2274209177	5414511999	9455801821	1134536157	13571950303	6572854373	20205344535	7054966876	22317465987	29593980509	4325286039	2604142905	6512715294	13806002865	4444951761	10500315189	58581519013	8.16623e+08	8428257293	1671816648	2.01148e+06	14929408854	9.12838e+08	6.89163e+08	1216791844	218719	4.894e+06	4283907929	3.50813e+08	1.07037e+07	5063294730	1366711654	2.7245e+07	187913	2573265370	10697374268	3973367986	2557546651	6.29468e+08	4980631002	1655258567	1366508034	3.75054e+08	1.73186e+08	1159912634
2006	106513995655	38302494169	477344241985	36545018657	2516336554	5322857838	8948745761	1082884939	9191952349	7252377388	20046330886	6821418657	32386847009	28436458457	3933766777	2802047283	8228060948	13412181651	4323983597	9630147110	49667112803	9.98656e+08	8610233843	2004542183	1723000	14796747718	8.42652e+08	6.87489e+08	1299717297	211009	4.79681e+06	4558101676	3.59047e+08	1.35592e+07	4799589369	1375880021	4.43851e+07	173832	2327571461	9999558031	10902968312	2748299647	6.58482e+08	3581835904	1544820907	1323560082	407176250	1.9228e+08	9.98457e+08
2007	98849516650	36912759382	449709756459	36907714561	2419312854	5499767532	8635010023	1051163020	12425282521	7149883979	19803636169	6607051726	32120247710	24851144576	3830003419	2889836029	7862041323	13670280895	4287508911	9406249256	42619365937	9.4739e+08	8330932158	1811556586	1.64757e+06	15527062156	7.73534e+08	7.10128e+08	1353789159	212902	4.80517e+06	4750351063	3.73167e+08	1.06795e+07	4699195754	1400261628	2.03684e+07	275440	2096304731	10423119836	12421713569	2759516518	653821764	3664260344	1306104814	1370527100	4.96492e+08	2.19015e+08	8.91769e+08
2008	96067469679	38919500700	436951379084	33182114704	2589341250	5487742687	7892728937	9.59314e+08	13079476733	7286948780	18731261736	6342217554	33114397149	24777554835	4267143967	2972870616	8187968394	13919036953	4638387585	7923065317	34416600692	1053846155	8271243507	2120053906	1.59621e+06	14648892178	7.16407e+08	7.10587e+08	1229016638	183682	4.50408e+06	4403180736	3.72628e+08	1.28455e+07	4932464270	1529418895	5.78674e+07	279947	2182326766	12953902116	10630075291	2804466664	6.37077e+08	3815922415	1296654117	1275218851	4.74665e+08	2.59318e+08	9.40031e+08
2009	90324096901	41595310738	408183258148	38073568370	2741274220	5864402347	7727141621	9.03853e+08	11376565213	7995942658	18832488206	6626147936	34349753519	24576875243	4763945533	3311204884	8700382570	14577529291	4803846655	9164396835	29332022496	1031747148	7953042065	2492171906	1.52186e+06	14783878577	8.06154e+08	7.82351e+08	1246997872	217621	4.52271e+06	4613577132	3.96513e+08	1.61079e+07	4893166302	1653899871	1.09142e+08	382376	2567443289	12322138578	10469533596	2917217616	7.28291e+08	4173338267	1352298793	1234786498	4.65547e+08	290782197	1087947806
2010	82931330761	39910542487	394247713814	36178091263	2597726924	5601405731	7662435657	8.45767e+08	13924628477	7245755319	18451777613	6549888878	32658964744	24203316193	4840905859	3220420082	7290907126	14546852354	4767486358	8445598587	25412587268	1030254885	8072223574	2563459915	1.50475e+06	17148397536	8.2406e+08	7.2761e+08	1192788905	254797	4.28553e+06	4279111837	3.73763e+08	1.30166e+07	4897390865	1271834793	6.84571e+07	407172	2492318428	12936073777	10512527934	3131130995	6.35763e+08	4411932783	1254133892	1223867407	431057500	252736875	1174360393
2011	75202423461	39060958757	350426674457	35088070973	2156145997	5866176559	6942213571	8.35385e+08	12650339395	8459588792	17991211007	6571241669	39287391366	22705513609	5730627128	3563164652	5858402962	16890631702	4664397733	8213747569	20014053624	9.72568e+08	7657279161	2576899373	1.65283e+06	17388527381	7.82168e+08	7.52095e+08	1168604292	257692	3.96038e+06	3098873979	4.15635e+08	1.72238e+07	4994103674	1552231604	6.82188e+07	447373	2248782109	13358626159	6044808367	3225491604	5.98371e+08	4643740407	24043029229	1969035257	459269850	2.24227e+08	8.67247e+08
2012	72943710418	40974915460	336572860327	34273399015	2070914383	5759720107	6876488806	7.99802e+08	12583366463	8228481626	17541915847	6387089579	38770844607	22187582838	5820313061	3534601754	5881588452	16823255553	5138135661	8374773873	18101947729	1003149865	7400373095	3180789102	1643800	17353141595	7.04405e+08	7.80292e+08	1170799674	254392	3.60941e+06	2958391339	4.09648e+08	3.98248e+07	5354793565	1655247557	8.5031e+07	451090	2559530048	14236465636	7023885912	3343926328	6.25434e+08	5127573529	42604284735	1994390162	452419375	2.42829e+08	962217555
2013	70245686339	40580730467	334581410526	36162274025	2022618336	5673521740	6632481294	7.87035e+08	12895083041	7730534275	17530315701	6377529964	39132348560	23146455412	6821587593	3712159371	5896383363	16892507895	5386795082	8141561499	16464723448	9.91432e+08	7389662897	3151478912	1.64894e+06	17956511152	7.11225e+08	7.7794e+08	1209000198	240407	3.43615e+06	3023213667	4.15158e+08	1.76478e+07	5611214707	1726286295	4.35265e+07	578075	2986922132	14726099750	7273409657	3274309817	5.95618e+08	5777147352	410733976125	2035645207	4.38162e+08	2.4956e+08	9.81496e+08
2014	70410643976	40741719928	320375063124	36225005692	2070796519	5979578040	6623776034	8.4278e+08	10972145837	8224145571	17543759584	6287239136	38657561739	22061539055	6973603190	4019106797	6198958963	18722752349	5639365368	8782782565	14972542735	9.35085e+08	7132539809	3597523357	1.63827e+06	17877008251	715313031	8.23269e+08	1220877954	232867	3417900	3046662241	4.41893e+08	3.84952e+07	5652110989	1726097564	1.22323e+08	588749	2811818654	14610371365	7771813421	3464926812	5.94783e+08	6263267525	20153917203	1995513663	4.4873e+08	4.04555e+08	9.43425e+08
2015	70781141047	42090223660	322499053046	37830551790	2110384416	5981256221	6754565258	8.3786e+08	11063912095	7930066747	18525281061	6708213771	39531440708	21967384122	6902988419	4038272418	6100756291	18559093779	5365130779	9087647522	14283815870	9.52645e+08	6975071652	3315863391	1.38616e+06	17965923570	7.48479e+08	8.13676e+08	1265569789	233656	2.6791e+06	3199307950	4.30767e+08	3.04819e+07	5616654288	1695300123	2.08774e+07	625614	2665318981	14574000000	8293902041	3480720039	5.70924e+08	3787399092	206962811307	2060037928	4.28242e+08	2.78853e+08	9.40738e+08
2016	71162694355	43510375108	320142554955	36713337343	2102055726	5988309107	6731627627	8.49956e+08	14785030272	8926935042	19857716274	6779829188	41206306522	20544593744	7003661135	4283227330	5865518643	18579824760	5492280850	9124886463	14156548106	9.70645e+08	7145763851	3923167100	1.36996e+06	17722602323	6.92757e+08	8.17423e+08	1318320234	242327	2.29951e+06	3346023479	4.48296e+08	3.33531e+07	5737238522	1621809530	4.00573e+07	624702	2827191481	14480749159	8130231008	3559471682	5.39274e+08	3712889242	30911596987	1823384037	4.30946e+08	2.75221e+08	9.63142e+08
Average	106102961224	39630250920	431444385855	36302316480	2313786617	5542259000	8425982164	1005542243	12523462912	7536622511	19371526567	6994802618	31437015467	26105166684	4898475939	3152481956	6978162029	15072690853	4895482408	10139627741	36501099217	963871682	8155772916	2388469100	1.80503e+06	15648734931	8.65233e+08	7.49662e+08	1247254800	239525	4.38136e+06	4016639138	3.78807e+08	1.83931e+07	5032394767	1458921235	5.16899e+07	348936	2636214805	12083384894	7036165554	2915049815	6.14253e+08	4621801175	44343203590	1625070701	4.39727e+08	2.67509e+08	1056516060
Cheese eco-potential GWP (RIW weighted)	China	United States	India	Russian Federation	Japan	Germany	Islamic Republic of Iran	Saudi Arabia	Indonesia	Canada	Mexico	South Africa	Brazil	Turkey	Australia	United Kingdom	Poland	France	Italy	Kazakhstan	Afghanistan	Albania	Algeria	Angola	Antigua and Barbuda	Argentina	Armenia	Austria	Azerbaijan	Bahrain	Barbados	Belarus	Belgium	Belize	Benin	Bolivia	Botswana	Brunei	Bulgaria	Burkina Faso	Burundi	Cameroon	Central African Republic	Chad	Chile	Colombia	Comoros	Congo	Croatia
2000	38868236679	8380212138	112401397466	8291114425	5.3134e+08	1156669453	2308681537	2.80064e+08	3390704857	1891081018	4480340624	1977891787	5305689579	6303479685	813167926	5.60178e+08	1651536291	2590499282	1124673557	3325930997	11668944637	2.3381e+08	2049590012	3.34312e+08	548312	3060051886	2.47871e+08	1.86182e+08	2.73345e+08	60973.5	1.27635e+06	1009679708	7.20872e+07	3.12025e+06	771130833	2.62404e+08	9.2633e+06	39258.9	6.83243e+08	1642138475	5.50334e+08	5.14828e+08	1.16641e+08	9.53007e+08	4.98549e+08	4.29438e+08	1.02049e+08	8.52643e+07	3.00766e+08
2001	37788404021	8538080750	120803593497	8536001067	5.22601e+08	1102458847	2414596372	2.81838e+08	2863362063	1547311036	4638691670	1800591021	4722246437	7231909864	7.37206e+08	5.34676e+08	1653171881	2912163980	1113611170	3233121439	13556580377	2.15466e+08	2094917462	389476145	522666	2968338937	2.4236e+08	1.62907e+08	2.74534e+08	61655.2	1.26655e+06	1084422748	7.07778e+07	2.55778e+06	1033141681	2.704e+08	6.63478e+06	40175.9	6.54898e+08	2347189585	7.60723e+08	5.30424e+08	1.29794e+08	1223827705	4.75916e+08	348761638	9.46333e+07	6.53775e+07	2.77275e+08
2002	35676792226	8657201413	121233659813	8287715313	5.05617e+08	1123638915	2349737160	2.71359e+08	2183293934	1427364905	4655664942	1752757709	4731846241	7085374086	7.45219e+08	5.65453e+08	1618395371	2991260948	1088804484	2808445654	11855998961	1.99571e+08	1996765013	3.63168e+08	499272	2990594245	256504390	1.59907e+08	2.72537e+08	62156.8	1.18948e+06	9.42698e+08	7.39777e+07	2.11109e+06	1038760415	2.67727e+08	3.09736e+06	40689.1	6.6322e+08	2396505543	7.14974e+08	5.49078e+08	1.4129e+08	1071774549	446824711	3.22549e+08	9.46924e+07	7.76795e+07	261286475
2003	31796710878	8575819749	119552534191	7641195337	5.0155e+08	1128974292	2272384388	268268515	2979047100	1399955280	4590215852	1672335492	4816822419	6675987796	819816576	5.48328e+08	1510778896	2972636840	1012064303	2634508994	12065107411	1.91535e+08	1925600943	3.6335e+08	471514	2941914607	2.37123e+08	1.48663e+08	2.85728e+08	53813.2	1.18007e+06	9.95586e+08	7.25855e+07	2.03989e+06	1121351295	3.00888e+08	4.16093e+06	39274.6	5.86971e+08	2439602193	7.24862e+08	542486559	1.25839e+08	1083300218	4.04641e+08	3.2495e+08	9.26657e+07	5.12942e+07	2.46383e+08
2004	28136129332	8349896720	114768397134	7921205643	5.04808e+08	1159672173	2173510226	2.54525e+08	2747002141	1460482752	4571167776	1552162096	4820447855	6745044279	8.57847e+08	5.72416e+08	1496032996	3017313731	1000451215	2425262876	13002454945	1.89609e+08	1895060237	3.52516e+08	453177	2983786683	2.21513e+08	1.50233e+08	2.82289e+08	50008.9	1.08745e+06	9.6649e+08	7.40987e+07	3.09459e+06	1161504456	2.6845e+08	1.45142e+07	40718.5	5.96575e+08	2196358399	8.05755e+08	566724006	140935702	1086840974	377495745	3.24121e+08	9.283e+07	4.71034e+07	2.45296e+08
2005	25363605808	8344030883	111614948495	7714019643	5.00326e+08	1191192640	2080276401	2.49598e+08	2985829067	1446027962	4445175798	1552092713	4909842517	6510675712	9.51563e+08	572911439	1432797365	3037320630	9.77889e+08	2310069342	12887934183	1.79657e+08	1854216605	3.678e+08	442526	3284469948	2.00824e+08	1.51616e+08	2.67694e+08	48118.1	1.07668e+06	9.4246e+08	7.71789e+07	2.35481e+06	1113924841	300676564	5.9939e+06	41340.8	5.66118e+08	2353422339	874140957	5.6266e+08	1.38483e+08	1095738820	3.64157e+08	3.00632e+08	8.25119e+07	3.8101e+07	2.55181e+08
2006	23433079044	8426548717	105015733237	8039904105	5.53594e+08	1171028724	1968724067	2.38235e+08	2022229517	1595523025	4410192795	1500712104	7125106342	6256020860	8.65429e+08	6.1645e+08	1810173409	2950679963	9.51276e+08	2118632364	10926764817	2.19704e+08	1894251445	4.40999e+08	379060	3255284498	1.85384e+08	151247641	2.85938e+08	46422	1.0553e+06	1002782369	7.89903e+07	2.98302e+06	1055909661	3.02694e+08	9.76472e+06	38243.1	5.12066e+08	2199902767	2398653029	6.04626e+08	1.44866e+08	7.88004e+08	3.39861e+08	291183218	89578775	4.23016e+07	2.19661e+08
2007	21746893663	8120807064	98936146421	8119697203	5.32249e+08	1209948857	1899702205	2.31256e+08	2733562155	1572974475	4356799957	1453551380	7066454496	5467251807	8.42601e+08	6.35764e+08	1729649091	3007461797	9.43252e+08	2069374836	9376260506	2.08426e+08	1832805075	3.98542e+08	362465	3415953674	1.70177e+08	1.56228e+08	297833615	46838.4	1.05714e+06	1045077234	8.20968e+07	2.34948e+06	1033823066	3.08058e+08	4.48105e+06	60596.7	4.61187e+08	2293086364	2732776985	607093634	1.43841e+08	8.06137e+08	2.87343e+08	3.01516e+08	1.09228e+08	4.81833e+07	1.96189e+08
2008	21134843329	8562290154	96129303399	7300065235	5.69655e+08	1207303391	1736400366	2.11049e+08	2877484881	1603128732	4120877582	1395287862	7285167373	5451062064	9.38772e+08	6.54032e+08	1801353047	3062188130	1020445269	1743074370	7571652152	231846154	1819673571	4.66412e+08	351165	3222756279	1.57609e+08	1.56329e+08	2.70384e+08	40409.9	990898	9.687e+08	8.19782e+07	2.826e+06	1085142139	336472157	1.27308e+07	61588.3	4.80112e+08	2849858466	2338616564	6.16983e+08	1.40157e+08	8.39503e+08	2.85264e+08	2.80548e+08	1.04426e+08	5.70499e+07	2.06807e+08
2009	19871301318	9150968362	89800316793	8376185041	6.0308e+08	1290168516	1699971157	1.98848e+08	2502844347	1759107385	4143147405	1457752546	7556945774	5406912553	1048068017	7.28465e+08	1914084165	3207056444	1056846264	2016167304	6453044949	2.26984e+08	1749669254	5.48278e+08	334809	3252453287	1.77354e+08	1.72117e+08	2.7434e+08	47876.7	994997	1014986969	8.72329e+07	3.54373e+06	1076496586	3.63858e+08	2.40112e+07	84122.8	5.64838e+08	2710870487	2303297391	6.41788e+08	1.60224e+08	9.18134e+08	2.97506e+08	2.71653e+08	1.0242e+08	6.39721e+07	2.39349e+08
2010	18244892768	8780319347	86734497039	7959180078	5.715e+08	1232309261	1685735844	1.86069e+08	3063418265	1594066170	4059391075	1440975553	7184972244	5324729563	1064999289	708492418	1603999568	3200307518	1048846999	1858031689	5590769199	2.26656e+08	1775889186	5.63961e+08	331045	3772647458	1.81293e+08	1.60074e+08	2.62414e+08	56055.3	942818	941404604	8.22278e+07	2.86365e+06	1077425990	2.79804e+08	1.50606e+07	89577.9	5.4831e+08	2845936231	2312756145	6.88849e+08	1.39868e+08	9.70625e+08	2.75909e+08	2.69251e+08	94832650	5.56021e+07	2.58359e+08
2011	16544533162	8593410926	77093868380	7719375614	4.74352e+08	1290558843	1527286986	1.83785e+08	2783074667	1861109534	3958066422	1445673167	8643226100	4995212994	1260737968	7.83896e+08	1288848652	3715938975	1026167501	1807024465	4403091797	2.13965e+08	1684601415	5.66918e+08	363623	3825476024	1.72077e+08	1.65461e+08	2.57093e+08	56692.2	871283	6.81752e+08	9.14397e+07	3.78923e+06	1098702808	341490953	1.50081e+07	98422	494732064	2938897755	1329857841	7.09608e+08	1.31642e+08	1021622890	5289466430	4.33188e+08	101039367	4.93299e+07	1.90794e+08
2012	16047616292	9014481401	74046029272	7540147783	4.55601e+08	1267138424	1512827537	1.75956e+08	2768340622	1810265958	3859221486	1405159707	8529585814	4881268224	1280468873	7.77612e+08	1293949459	3701116222	1130389845	1842450252	3982428500	2.20693e+08	1628082081	6.99774e+08	361636	3817691151	1.54969e+08	171664329	2.57576e+08	55966.2	794071	6.50846e+08	9.01227e+07	8.76145e+06	1178054584	3.64154e+08	1.87068e+07	99239.8	5.63097e+08	3132022440	1545254901	7.35664e+08	137595578	1128066176	9372942642	4.38766e+08	9.95323e+07	5.34223e+07	2.11688e+08
2013	15454050995	8927760703	73607910316	7955700286	4.44976e+08	1248174783	1459145885	173147653	2836918269	1700717540	3856669454	1403056592	8609116683	5092220191	1500749270	8.16675e+08	1297204340	3716351737	1185094918	1791143530	3622239158	2.18115e+08	1625725837	6.93325e+08	362766	3950432454	156469536	1.71147e+08	2.6598e+08	52889.6	755952	6.65107e+08	9.13348e+07	3.88251e+06	1234467236	3.79783e+08	9.57584e+06	127176	6.57123e+08	3239741945	1600150125	7.20348e+08	1.31036e+08	1270972417	90361474748	4.47842e+08	96395650	5.49032e+07	2.15929e+08
2014	15490341675	8963178384	70482513887	7969501252	4.55575e+08	1315507169	1457230728	1.85412e+08	2413872084	1809312026	3859627109	1383192610	8504663583	4853538592	1534192702	8.84203e+08	1363770972	4119005517	1240660381	1932212164	3293959402	205718787	1569158758	7.91455e+08	360418	3932941815	1.57369e+08	1.81119e+08	2.68593e+08	51230.8	751938	6.70266e+08	9.72166e+07	8.46894e+06	1243464418	3.79741e+08	2.6911e+07	129525	6.186e+08	3214281700	1709798953	7.62284e+08	1.30852e+08	1377918855	4433861785	4.39013e+08	98720700	8.90022e+07	2.07553e+08
2015	15571851030	9259849205	70949791670	8322721394	4.64285e+08	1315876369	1486004357	1.84329e+08	2434060661	1744614684	4075561833	1475807030	8696916956	4832824507	1518657452	888419932	1342166384	4083000631	1180328771	1999282455	3142439491	2.09582e+08	1534515763	7.2949e+08	304956	3952503185	1.64665e+08	1.79009e+08	2.78425e+08	51404.3	589402	703847749	9.47687e+07	6.70601e+06	1235663943	372966027	4.59303e+06	137635	5.8637e+08	3206280000	1824658449	7.65758e+08	1.25603e+08	8.33228e+08	45531818488	4.53208e+08	9.42132e+07	6.13476e+07	2.06962e+08
2016	15655792758	9572282524	70431362090	8076934215	4.62452e+08	1317428003	1480958078	1.8699e+08	3252706660	1963925709	4368697580	1491562421	9065387435	4519810624	1540805450	9.4231e+08	1290414101	4087561447	1208301787	2007475022	3114440583	2.13542e+08	1572068047	8.63097e+08	301390	3898972511	1.52406e+08	179832972	2.9003e+08	53311.9	505892	7.36125e+08	9.86251e+07	7.33768e+06	1262192475	3.56798e+08	8.8126e+06	137435	6.21982e+08	3185764815	1788650822	7.83084e+08	1.1864e+08	8.16836e+08	6800551337	401144488	9.4808e+07	6.05486e+07	2.11891e+08
Average	23342651469	8718655202	94917764888	7986509626	5.09033e+08	1219296980	1853716076	2.21219e+08	2755161841	1658056952	4261735845	1538856576	6916143403	5743136671	1077664707	6.93546e+08	1535195646	3315991988	1077006130	2230718103	8030241828	212051770	1794270042	5.25463e+08	397106	3442721685	1.90351e+08	1.64926e+08	2.74396e+08	52695.5	963898	8.83661e+08	8.33376e+07	4.04648e+06	1107126849	3.20963e+08	1.13718e+07	76765.8	579967257	2658344677	1547956422	6.41311e+08	1.35136e+08	1016796259	9755504790	3.57516e+08	9.67399e+07	5.88519e+07	2.32434e+08
Peas eco-potential GWP (RIW weighted)	China	United States	India	Russian Federation	Japan	Germany	Islamic Republic of Iran	Saudi Arabia	Indonesia	Canada	Mexico	South Africa	Brazil	Turkey	Australia	United Kingdom	Poland	France	Italy	Kazakhstan	Afghanistan	Albania	Algeria	Angola	Antigua and Barbuda	Argentina	Armenia	Austria	Azerbaijan	Bahrain	Barbados	Belarus	Belgium	Belize	Benin	Bolivia	Botswana	Brunei	Bulgaria	Burkina Faso	Burundi	Cameroon	Central African Republic	Chad	Chile	Colombia	Comoros	Congo	Croatia
2000	1413390425	3.04735e+08	4087323544	301495070	1.93215e+07	4.20607e+07	8.39521e+07	1.01841e+07	1.23298e+08	6.87666e+07	1.62921e+08	7.19233e+07	1.92934e+08	2.29217e+08	2.95697e+07	2.03701e+07	6.00559e+07	9.42e+07	4.08972e+07	1.20943e+08	4.24325e+08	8.50218e+06	7.45305e+07	1.21568e+07	19938.6	111274614	9.01348e+06	6.77027e+06	9.93981e+06	2217.22	46412.8	3.67156e+07	2.62135e+06	113464	2.80411e+07	9.54196e+06	336847	1427.6	2.48452e+07	5.97141e+07	2.00121e+07	1.8721e+07	4.24149e+06	3.46548e+07	1.8129e+07	1.56159e+07	3.71086e+06	3.10052e+06	1.09369e+07
2001	1374123783	3.10476e+08	4392857945	3.104e+08	1.90037e+07	4.00894e+07	8.78035e+07	1.02487e+07	1.04122e+08	5.62659e+07	1.6868e+08	6.5476e+07	1.71718e+08	2.62979e+08	2.68075e+07	1.94428e+07	6.01153e+07	105896872	4.0495e+07	1.17568e+08	4.92967e+08	7.83513e+06	7.61788e+07	1.41628e+07	19006	1.0794e+08	8.8131e+06	5923877	9.98306e+06	2242.01	46056.3	3.94336e+07	2.57374e+06	93010.4	3.75688e+07	9.83274e+06	241265	1460.94	2.38145e+07	8.53523e+07	2.76626e+07	1.92882e+07	4.71977e+06	4.45028e+07	1.73061e+07	1.26822e+07	3.44121e+06	2.37736e+06	1.00827e+07
2002	1297337899	3.14807e+08	4408496720	3.01371e+08	1.83861e+07	4.08596e+07	8.5445e+07	9.86759e+06	7.93925e+07	5.19042e+07	169296907	6.37366e+07	172067136	2.5765e+08	2.70989e+07	2.05619e+07	5.88507e+07	1.08773e+08	3.95929e+07	1.02125e+08	4.31127e+08	7.25713e+06	7.26096e+07	1.32061e+07	18155.4	1.08749e+08	9.32743e+06	5.81481e+06	9.91044e+06	2260.25	43253.7	3.42799e+07	2.6901e+06	76766.8	3.77731e+07	9.73554e+06	112631	1479.6	2.41171e+07	8.71457e+07	2.5999e+07	1.99665e+07	5.13783e+06	3.89736e+07	1.62482e+07	1.17291e+07	3.44336e+06	2.82471e+06	9.50133e+06
2003	1156244032	3.11848e+08	4347364880	2.77862e+08	1.82382e+07	4.10536e+07	8.26322e+07	9.75522e+06	1.08329e+08	5.09075e+07	1.66917e+08	6.08122e+07	1.75157e+08	2.42763e+08	2.98115e+07	1.99392e+07	5.49374e+07	1.08096e+08	3.68023e+07	9.58003e+07	4.38731e+08	6.96491e+06	7.00219e+07	1.32127e+07	17145.9	106978713	8.62266e+06	5.40591e+06	1.03901e+07	1956.84	42911.8	3.62031e+07	2.63947e+06	74178	4.07764e+07	1.09414e+07	151306	1428.17	2.13444e+07	8.87128e+07	2.63586e+07	1.97268e+07	4.57596e+06	3.93927e+07	1.47142e+07	1.18164e+07	3.36966e+06	1.86524e+06	8.95937e+06
2004	1023131976	303632608	4173396259	2.88044e+08	1.83567e+07	4.21699e+07	7.90367e+07	9.25545e+06	9.9891e+07	5.31085e+07	1.66224e+08	5.64423e+07	1.75289e+08	2.45274e+08	3.11944e+07	2.08151e+07	5.44012e+07	1.0972e+08	3.638e+07	8.81914e+07	4.72817e+08	6.89486e+06	6.89113e+07	1.28188e+07	16479.2	1.08501e+08	8.05503e+06	5.46303e+06	1.0265e+07	1818.5	39543.6	3.51451e+07	2.6945e+06	112531	4.22365e+07	9.76183e+06	527790	1480.67	2.16936e+07	7.98676e+07	2.93002e+07	2.06081e+07	5.12493e+06	3.95215e+07	13727118	1.17862e+07	3.37564e+06	1.71285e+06	8.91987e+06
2005	9.22313e+08	3.03419e+08	4058725400	2.8051e+08	1.81937e+07	4.33161e+07	7.56464e+07	9.07629e+06	1.08576e+08	5.25828e+07	1.61643e+08	5.64397e+07	1.7854e+08	2.36752e+08	3.46023e+07	2.08331e+07	5.21017e+07	1.10448e+08	3.55596e+07	8.40025e+07	4.68652e+08	6.53298e+06	6.74261e+07	1.33745e+07	16091.9	1.19435e+08	7.3027e+06	5.5133e+06	9.73433e+06	1749.75	39152	3.42713e+07	2.8065e+06	85629.3	4.05064e+07	1.09337e+07	217960	1503.3	2.05861e+07	8.5579e+07	3.17869e+07	2.04604e+07	5.03575e+06	3.9845e+07	1.32421e+07	1.09321e+07	3.00043e+06	1.38549e+06	9.2793e+06
2006	8.52112e+08	3.0642e+08	3818753936	2.9236e+08	2.01307e+07	4.25829e+07	7.159e+07	8.66308e+06	7.35356e+07	5.8019e+07	1.60371e+08	5.45713e+07	2.59095e+08	2.27492e+08	3.14701e+07	2.24164e+07	6.58245e+07	1.07297e+08	3.45919e+07	7.70412e+07	3.97337e+08	7.98925e+06	6.88819e+07	1.60363e+07	13784	1.18374e+08	6.74122e+06	5.49991e+06	1.03977e+07	1688.07	38374.5	3.64648e+07	2.87237e+06	108474	3.83967e+07	1.1007e+07	355081	1390.66	1.86206e+07	7.99965e+07	8.72237e+07	2.19864e+07	5.26785e+06	2.86547e+07	1.23586e+07	1.05885e+07	3257410	1.53824e+06	7.98766e+06
2007	7.90796e+08	2.95302e+08	3597678052	2.95262e+08	1.93545e+07	4.39981e+07	6.90801e+07	8.4093e+06	9.94023e+07	5.71991e+07	1.58429e+08	5.28564e+07	2.56962e+08	1.98809e+08	3.064e+07	2.31187e+07	6.28963e+07	1.09362e+08	3.43001e+07	7.525e+07	3.40955e+08	7.57912e+06	6.66475e+07	1.44925e+07	13180.5	1.24216e+08	6.18827e+06	5.68102e+06	1.08303e+07	1703.21	38441.4	3.80028e+07	2.98534e+06	85435.7	3.75936e+07	1.12021e+07	162947	2203.52	1.67704e+07	8.3385e+07	9.93737e+07	2.20761e+07	5.23057e+06	2.93141e+07	1.04488e+07	1.09642e+07	3.97193e+06	1.75212e+06	7.13415e+06
2008	7.6854e+08	3.11356e+08	3495611033	2.65457e+08	20714730	4.39019e+07	6.31418e+07	7.67451e+06	1.04636e+08	5.82956e+07	1.4985e+08	5.07377e+07	2.64915e+08	1.9822e+08	3.41372e+07	2.3783e+07	6.55037e+07	1.11352e+08	3.71071e+07	6.33845e+07	2.75333e+08	8.43077e+06	6.61699e+07	1.69604e+07	12769.6	1.17191e+08	5.73125e+06	5.68469e+06	9.83213e+06	1469.45	36032.7	3.52254e+07	2.98103e+06	102764	3.94597e+07	1.22354e+07	462939	2239.57	1.74586e+07	1.03631e+08	8.50406e+07	2.24357e+07	5.09661e+06	3.05274e+07	1.03732e+07	1.02018e+07	3.79732e+06	2.07454e+06	7.52025e+06
2009	7.22593e+08	3.32762e+08	3265466065	304588547	2.19302e+07	4.69152e+07	6.18171e+07	7.23083e+06	9.10125e+07	6.39675e+07	1.5066e+08	5.30092e+07	2.74798e+08	1.96615e+08	3.81116e+07	2.64896e+07	6.96031e+07	1.1662e+08	3.84308e+07	7.33152e+07	234656180	8.25398e+06	6.36243e+07	1.99374e+07	12174.9	1.18271e+08	6.44924e+06	6.25881e+06	9.97598e+06	1740.97	36181.7	3.69086e+07	3.17211e+06	128863	3.91453e+07	1.32312e+07	873133	3059.01	2.05395e+07	9.85771e+07	8.37563e+07	2.33377e+07	5.82633e+06	3.33867e+07	1.08184e+07	9.87829e+06	3.72437e+06	2.32626e+06	8.70358e+06
2010	6.63451e+08	3.19284e+08	3153981711	2.89425e+08	2.07818e+07	4.48112e+07	6.12995e+07	6.76613e+06	1.11397e+08	5.7966e+07	1.47614e+08	5.23991e+07	2.61272e+08	1.93627e+08	3.87272e+07	2.57634e+07	58327257	1.16375e+08	3.81399e+07	6.75648e+07	2.03301e+08	8.24204e+06	6.45778e+07	2.05077e+07	12038	1.37187e+08	6.59248e+06	5.82088e+06	9.54231e+06	2038.37	34284.3	3.42329e+07	2.9901e+06	104133	3.91791e+07	1.01747e+07	547656	3257.38	1.99385e+07	1.03489e+08	8.41002e+07	2.5049e+07	5.08611e+06	3.52955e+07	1.00331e+07	9.79094e+06	3448460	2021895	9.39488e+06
2011	6.01619e+08	3.12488e+08	2803413396	2.80705e+08	1.72492e+07	4.69294e+07	5.55377e+07	6.68308e+06	1.01203e+08	6.76767e+07	1.4393e+08	5.25699e+07	3.14299e+08	1.81644e+08	4.5845e+07	2.85053e+07	4.68672e+07	1.35125e+08	3.73152e+07	6.571e+07	160112429	7.78054e+06	6.12582e+07	2.06152e+07	13222.7	139108219	6.25734e+06	6.01676e+06	9.34883e+06	2061.53	31683	2.4791e+07	3.32508e+06	137790	3.99528e+07	1.24179e+07	545750	3578.98	1.79903e+07	1.06869e+08	4.83585e+07	2.58039e+07	4.78697e+06	3.71499e+07	1.92344e+08	1.57523e+07	3.67416e+06	1.79381e+06	6.93797e+06
2012	5.8355e+08	3.27799e+08	2692582883	2.74187e+08	1.65673e+07	4.60778e+07	5.50119e+07	6.39842e+06	1.00667e+08	6.58279e+07	1.40335e+08	5.10967e+07	3.10167e+08	1.77501e+08	4.65625e+07	2.82768e+07	4.70527e+07	1.34586e+08	4.11051e+07	6.69982e+07	1.44816e+08	8.0252e+06	5.9203e+07	2.54463e+07	13150.4	1.38825e+08	5.63524e+06	6.24234e+06	9.3664e+06	2035.14	28875.3	2.36671e+07	3.27719e+06	318598	4.28383e+07	1.3242e+07	680248	3608.72	2.04762e+07	1.13892e+08	5.61911e+07	2.67514e+07	5.00348e+06	4.10206e+07	3.40834e+08	1.59551e+07	3619355	1.94263e+06	7.69774e+06
2013	5.61965e+08	3.24646e+08	2676651284	2.89298e+08	1.61809e+07	4.53882e+07	5.30599e+07	6.29628e+06	1.03161e+08	6.18443e+07	1.40243e+08	5.10202e+07	3.13059e+08	1.85172e+08	5.45727e+07	2.96973e+07	4.71711e+07	1.3514e+08	4.30944e+07	65132492	1.31718e+08	7.93146e+06	5.91173e+07	2.52118e+07	13191.5	1.43652e+08	5.6898e+06	6.22352e+06	9.672e+06	1923.26	27489.2	2.41857e+07	3.32126e+06	141182	4.48897e+07	1.38103e+07	348212	4624.6	2.38954e+07	117808798	5.81873e+07	2.61945e+07	4.76494e+06	4.62172e+07	3285871809	1.62852e+07	3.5053e+06	1.99648e+06	7.85197e+06
2014	5.63285e+08	3.25934e+08	2563000505	2.898e+08	1.65664e+07	4.78366e+07	5.29902e+07	6.74224e+06	8.77772e+07	6.57932e+07	1.4035e+08	5.02979e+07	3.0926e+08	1.76492e+08	5.57888e+07	3.21529e+07	4.95917e+07	1.49782e+08	4.51149e+07	7.02623e+07	1.1978e+08	7.48068e+06	5.70603e+07	2.87802e+07	13106.1	143016066	5.7225e+06	6.58615e+06	9.76702e+06	1862.94	27343.2	2.43733e+07	3.53515e+06	307961	4.52169e+07	1.38088e+07	978581	4709.99	2.24945e+07	1.16883e+08	6.21745e+07	2.77194e+07	4.75826e+06	5.01061e+07	1.61231e+08	1.59641e+07	3.58984e+06	3.23644e+06	7.5474e+06
2015	5.66249e+08	3.36722e+08	2579992424	3.02644e+08	1.68831e+07	4.785e+07	5.40365e+07	6.70288e+06	8.85113e+07	6.34405e+07	1.48202e+08	5.36657e+07	3.16252e+08	175739073	5.52239e+07	3.23062e+07	4.88061e+07	1.48473e+08	4.2921e+07	7.27012e+07	114270527	7.62116e+06	5.58006e+07	2.65269e+07	11089.3	1.43727e+08	5.98783e+06	6.50941e+06	1.01246e+07	1869.25	21432.8	2.55945e+07	3.44613e+06	243855	4.49332e+07	1.35624e+07	167019	5004.91	2.13226e+07	116592000	6.63512e+07	2.78458e+07	4.56739e+06	3.02992e+07	1655702490	1.64803e+07	3.42594e+06	2.23082e+06	7.5259e+06
2016	5.69302e+08	3.48083e+08	2561140440	2.93707e+08	1.68164e+07	4.79065e+07	5.3853e+07	6.79965e+06	1.1828e+08	7.14155e+07	1.58862e+08	5.42386e+07	3.2965e+08	164356750	5.60293e+07	3.42658e+07	4.69241e+07	1.48639e+08	4.39382e+07	7.29991e+07	1.13252e+08	7.76516e+06	5.71661e+07	3.13853e+07	10959.7	1.41781e+08	5.54205e+06	6.53938e+06	1.05466e+07	1938.62	18396.1	2.67682e+07	3.58637e+06	266825	4.58979e+07	1.29745e+07	320458	4997.62	2.26175e+07	1.15846e+08	6.50418e+07	2.84758e+07	4.31419e+06	2.97031e+07	2.47293e+08	1.45871e+07	3.44757e+06	2.20177e+06	7.70513e+06
Average	8.48824e+08	3.17042e+08	3451555087	2.90419e+08	1.85103e+07	44338072	6.74079e+07	8.04434e+06	1.00188e+08	6.0293e+07	1.54972e+08	5.59584e+07	2.51496e+08	2.08841e+08	3.91878e+07	2.52199e+07	5.58253e+07	1.20582e+08	3.91639e+07	8.1117e+07	2.92009e+08	7.71097e+06	6.52462e+07	1.91078e+07	14440.2	1.2519e+08	6.92186e+06	5.9973e+06	9.97804e+06	1916.2	35050.8	3.21331e+07	3.03046e+06	147145	4.02592e+07	1.16714e+07	413519	2791.48	2.10897e+07	9.66671e+07	5.62893e+07	2.33204e+07	4.91403e+06	3.69744e+07	3.54746e+08	1.30006e+07	3.51781e+06	2.14007e+06	8.45213e+06
Pig Meat eco-potential GWP (RIW weighted)	China	United States	India	Russian Federation	Japan	Germany	Islamic Republic of Iran	Saudi Arabia	Indonesia	Canada	Mexico	South Africa	Brazil	Turkey	Australia	United Kingdom	Poland	France	Italy	Kazakhstan	Afghanistan	Albania	Algeria	Angola	Antigua and Barbuda	Argentina	Armenia	Austria	Azerbaijan	Bahrain	Barbados	Belarus	Belgium	Belize	Benin	Bolivia	Botswana	Brunei	Bulgaria	Burkina Faso	Burundi	Cameroon	Central African Republic	Chad	Chile	Colombia	Comoros	Congo	Croatia
2000	26854418069	5789964750	77659147340	5728406330	367107837	799153440	1595089062	1.93499e+08	2342668810	1306565067	3095508067	1366543417	3665749164	4355131419	5.61825e+08	3.87032e+08	1141061437	1789799504	7.77047e+08	2297915961	8062179931	1.61541e+08	1416080372	2.30979e+08	378834	2114217667	1.71256e+08	1.28635e+08	1.88856e+08	42127.1	881844	6.97597e+08	4.98057e+07	2.15581e+06	5.32781e+08	1.81297e+08	6.4001e+06	27124.3	4.72059e+08	1134568401	380230742	3.55699e+08	8.05883e+07	6.58441e+08	344451882	2.96702e+08	70506410	5.89099e+07	2.07802e+08
2001	26108351869	5899037609	83464300962	5897600737	3.6107e+08	7.61699e+08	1668266584	194724677	1978322880	1069051261	3204914245	1244044706	3262642993	4996592269	509342353	3.69413e+08	1142191481	2012040568	7.69404e+08	2233792994	9366364624	1.48867e+08	1447397519	2.69093e+08	361115	2050852357	1.67449e+08	112553663	1.89678e+08	42598.2	875070	7.49238e+08	4.8901e+07	1.7672e+06	7.13807e+08	1.86822e+08	4.58403e+06	27757.9	4.52475e+08	1621694622	5.2559e+08	3.66475e+08	8.96757e+07	8.45554e+08	3.28815e+08	2.40963e+08	6.5383e+07	4.51699e+07	191571953
2002	24649420083	5981339158	83761437689	5726057853	3.49336e+08	7.76332e+08	1623454765	1.87484e+08	1508457627	9.86179e+08	3216641232	1210996235	3269275585	4895349368	5.14879e+08	3.90676e+08	1118164075	2066689382	7.52265e+08	1940380634	8191417464	137885563	1379583100	2.50916e+08	344952	2066228751	1.77221e+08	1.10481e+08	1.88298e+08	42944.7	821820	6.51318e+08	5.11118e+07	1.45857e+06	7.17689e+08	184975346	2.14e+06	28112.5	4.58225e+08	1655767466	4.93982e+08	3.79363e+08	9.76188e+07	7.40499e+08	3.08715e+08	2.22852e+08	6.54239e+07	5.36695e+07	1.80525e+08
2003	21968636606	5925111826	82599932713	5279371323	3.46525e+08	7.80019e+08	1570011032	1.85349e+08	2058250724	9.67242e+08	3171421861	1155431794	3327986398	4612500659	5.66419e+08	3.78845e+08	1043810874	2053821817	6.99244e+08	1820206214	8335892393	1.32333e+08	1330415197	2.51042e+08	325773	2032595547	1.63831e+08	102712331	1.97412e+08	37180	815324	687859196	5.015e+07	1.40938e+06	7.74752e+08	2.07886e+08	2.87482e+06	27135.2	405543842	1685543333	5.00814e+08	3.74809e+08	8.69432e+07	7.48462e+08	2.7957e+08	2.24511e+08	6.40236e+07	3.54396e+07	1.70228e+08
2004	19439507538	5769019552	79294528929	5472832990	3.48777e+08	8.01228e+08	1501697975	1.75854e+08	1897928752	1009060811	3158261373	1072402903	3330491245	4660212411	5.92694e+08	3.95487e+08	1033622797	2084689487	6.91221e+08	1675636169	8983514326	1.31002e+08	1309314346	2.43557e+08	313104	2061525344	1.53046e+08	1.03798e+08	1.95036e+08	34551.6	751328	6.67757e+08	5.11955e+07	2.13808e+06	8.02494e+08	1.85475e+08	1.0028e+07	28132.8	4.12179e+08	1517483985	5.56703e+08	3.91555e+08	9.73738e+07	7.50908e+08	260815242	223938128	6.41371e+07	3.25441e+07	1.69477e+08
2005	17523945831	5764966792	77115782597	5329686299	3.4568e+08	8.23006e+08	1437281877	1.72449e+08	2062936446	9.99074e+08	3071212369	1072354965	3392254830	4498285037	657443478	3.9583e+08	9.89933e+08	2098512435	6.75633e+08	1596047909	8904390890	124126694	1281095109	2.54116e+08	305745	2269270146	138751389	1.04753e+08	1.84952e+08	33245.2	743889	6.51154e+08	5.33236e+07	1.62696e+06	7.69621e+08	2.0774e+08	4.14124e+06	28562.7	3.91136e+08	1626000889	6.03952e+08	3.88747e+08	9.56792e+07	7.57056e+08	2.51599e+08	2.07709e+08	5.70083e+07	2.63243e+07	1.76307e+08
2006	16190127340	5821979114	72556324782	5554842836	3.82483e+08	8.09074e+08	1360209356	1.64599e+08	1397176757	1102361363	3047042295	1036855636	4922800745	4322341685	5.97933e+08	425911187	1250665264	2038651611	6.57246e+08	1463782361	7549401146	1.51796e+08	1308755544	3.0469e+08	261896	2249105653	1.28083e+08	1.04498e+08	1.97557e+08	32073.4	729115	6.92831e+08	5.45751e+07	2.061e+06	7.29538e+08	2.09134e+08	6.74653e+06	26422.5	3.53791e+08	1519932821	1657251183	4.17742e+08	1.00089e+08	5.44439e+08	2.34813e+08	2.01181e+08	61890790	2.92265e+07	151765490
2007	15025126531	5610739426	68355882982	5609972613	3.67736e+08	8.35965e+08	1312521523	159776779	1888642943	1086782365	3010152698	1004271862	4882277652	3777373976	5.82161e+08	4.39255e+08	1195030281	2077882696	6.51701e+08	1429749887	6478143622	1.44003e+08	1266301688	275356601	250430	2360113448	1.17577e+08	1.07939e+08	2.05776e+08	32361.1	730386	7.22053e+08	5.67214e+07	1.62328e+06	7.14278e+08	2.1284e+08	3.096e+06	41866.8	3.18638e+08	1584314215	1888100462	4.19447e+08	9.93809e+07	5.56968e+08	1.98528e+08	2.0832e+08	7.54667e+07	3.32903e+07	1.35549e+08
2008	14602255391	5915764106	66416609621	5043681435	3.9358e+08	8.34137e+08	1199694798	1.45816e+08	1988080463	1107616215	2847151784	9.64017e+08	5033388367	3766188335	6.48606e+08	4.51876e+08	1244571196	2115693617	705034913	1204305928	5231323305	1.60185e+08	1257229013	3.22248e+08	242623	2226631611	1.08894e+08	1.08009e+08	1.86811e+08	27919.6	684620	6.69283e+08	5.66395e+07	1952510	749734569	2.32472e+08	8.79584e+06	42551.9	3.31714e+08	1968993122	1615771444	4.26279e+08	9.68357e+07	580020207	1.97091e+08	1.93833e+08	7.21491e+07	3.94163e+07	1.42885e+08
2009	13729262729	6322487232	62043855238	5787182392	4.16674e+08	8.91389e+08	1174525526	1.37386e+08	1729237912	1215383284	2862538207	1007174486	5221162535	3735685037	724119721	5.03303e+08	1322458151	2215784452	7.30185e+08	1392988319	4458467419	1.56826e+08	1208862394	3.7881e+08	231323	2247149544	1.22535e+08	1.18917e+08	1.89544e+08	33078.4	687452	7.01264e+08	6.027e+07	2.4484e+06	7.43761e+08	2.51393e+08	1.65895e+07	58121.2	3.90251e+08	1872965064	1591369107	4.43417e+08	1.107e+08	6.34347e+08	2.05549e+08	1.87688e+08	7.07631e+07	4.41989e+07	1.65368e+08
2010	12605562276	6066402458	59925652500	5499069872	3.94854e+08	8.51414e+08	1164690220	1.28557e+08	2116543529	1101354808	2804670197	9.95583e+08	4964162641	3678904061	7.35818e+08	4.89504e+08	1108217883	2211121558	7.24658e+08	1283730985	3862713265	1.56599e+08	1226977983	3.89646e+08	228722	2606556425	1.25257e+08	1.10597e+08	1.81304e+08	38729.1	651401	6.50425e+08	5.68119e+07	1.97852e+06	7.44403e+08	1.93319e+08	1.04055e+07	61890.2	378832401	1966283214	1597904246	4.75932e+08	9.6636e+07	6.70614e+08	1.90628e+08	1.86028e+08	65520740	38416005	1.78503e+08
2011	11430768366	5937265731	53264854517	5333386788	3.27734e+08	8.91659e+08	1055216463	1.26978e+08	1922851588	1285857496	2734664073	9.98829e+08	5971683488	3451238069	8.71055e+08	5.41601e+08	8.90477e+08	2567376019	7.08988e+08	1248489630	3042136151	1.4783e+08	1163906432	3.91689e+08	251231	2643056162	1.18889e+08	1.14318e+08	1.77628e+08	39169.1	601977	4.71029e+08	6.31766e+07	2.61801e+06	7.59104e+08	2.35939e+08	1.03693e+07	68000.7	3.41815e+08	2030511176	9.18811e+08	4.90275e+08	9.09524e+07	7.05849e+08	3654540443	299293359	6.9809e+07	3.40825e+07	1.31821e+08
2012	11087443984	6228187150	51159074770	5209556650	3.14779e+08	8.75477e+08	1045226298	1.2157e+08	1912671702	1250729207	2666371209	9.70838e+08	5893168380	3372512591	8.84688e+08	5.37259e+08	8.94001e+08	2557134844	7.80997e+08	1272965629	2751496055	1.52479e+08	1124856710	4.8348e+08	249858	2637677522	1.0707e+08	1.18604e+08	1.77962e+08	38667.6	548631	4.49675e+08	6.22666e+07	6.05337e+06	8.13929e+08	2.51598e+08	1.29247e+07	68565.7	3.89049e+08	2163942777	1067630659	5.08277e+08	9.5066e+07	7.79391e+08	6475851280	3.03147e+08	68767745	3.691e+07	1.46257e+08
2013	10677344324	6168271031	50856374400	5496665652	3.07438e+08	8.62375e+08	1008137157	1.19629e+08	1960052622	1175041210	2664607986	9.69385e+08	5948116981	3518261223	1036881314	5.64248e+08	8.9625e+08	2567661200	8.18793e+08	1237517348	2502637964	1.50698e+08	1123228760	4.79025e+08	250638	2729389695	1.08106e+08	1.18247e+08	1.83768e+08	36541.9	522294	4.59528e+08	6.3104e+07	2.68246e+06	8.52905e+08	2.62396e+08	6.61603e+06	87867.3	4.54012e+08	2238367162	1105558268	4.97695e+08	9.05339e+07	8.78126e+08	62431564371	3.09418e+08	6.66006e+07	3.79331e+07	1.49187e+08
2014	10702417884	6192741429	48697009595	5506200865	3.14761e+08	9.08896e+08	1006813957	1.28103e+08	1667766167	1250070127	2666651457	9.5566e+08	5875949384	3353353936	1059987685	6.10904e+08	9.42242e+08	2845858357	8.57184e+08	1334982950	2275826496	1.42133e+08	1084146051	5.46824e+08	249016	2717305254	1.08728e+08	125136875	185573449	35395.8	519521	4.63093e+08	6.71678e+07	5.85127e+06	8.59121e+08	2.62367e+08	1.8593e+07	89489.8	4.27396e+08	2220776448	1181315640	5.26669e+08	9.0407e+07	9.52017e+08	3063395415	3.03318e+08	6.8207e+07	6.14924e+07	143400530
2015	10758733439	6397713996	49019856063	5750243872	3.20778e+08	9.09151e+08	1026693919	127354658	1681714638	1205370145	2815842721	1019648493	6008778988	3339042386	1049254240	6.13817e+08	9.27315e+08	2820982254	8.155e+08	1381322423	2171140012	1.44802e+08	1060210891	5.04011e+08	210697	2730820383	1.13769e+08	1.23679e+08	1.92367e+08	35515.7	407223	4.86295e+08	6.54765e+07	4.63324e+06	8.53731e+08	2.57686e+08	3.17337e+06	95093.3	4.05128e+08	2215248000	1260673110	5.29069e+08	8.67804e+07	5.75685e+08	31458347319	313125765	6.50928e+07	4.23856e+07	1.42992e+08
2016	10816729542	6613577016	48661668353	5580427276	3.19512e+08	9.10223e+08	1023207399	1.29193e+08	2247324601	1356894126	3018372874	1030534037	6263358591	3122778249	1064556492	6.51051e+08	8.91559e+08	2824133364	8.34827e+08	1386982742	2151795312	1.47538e+08	1086156105	5.96321e+08	208233	2693835553	1.05299e+08	1.24248e+08	2.00385e+08	36833.7	349525	5.08596e+08	6.8141e+07	5.06967e+06	8.7206e+08	2.46515e+08	6.0887e+06	94954.8	4.29733e+08	2201073872	1235795113	5.4104e+08	8.19696e+07	5.64359e+08	4698562742	2.77154e+08	6.55037e+07	4.18336e+07	1.46398e+08
Average	16127650106	6023798140	65579546650	5517952105	3.51696e+08	8.42423e+08	1280749289	1.52842e+08	1903566363	1145566622	2944472038	1063209998	4778426351	3967985336	7.44568e+08	4.79177e+08	1060680628	2291049010	744113326	1541223417	5548167081	1.46508e+08	1239677483	3.63047e+08	274364	2378607710	1.31515e+08	1.13949e+08	1.89583e+08	36407.8	665966	6.10529e+08	5.75787e+07	2.79575e+06	7.64924e+08	2.21756e+08	7.85686e+06	53038.2	4.00705e+08	1836674504	1069497164	4.43088e+08	9.33665e+07	7.02514e+08	6740166946	2.47011e+08	6.68385e+07	4.06613e+07	1.6059e+08
Eggs eco-potential GWP (RIW weighted)	China	United States	India	Russian Federation	Japan	Germany	Islamic Republic of Iran	Saudi Arabia	Indonesia	Canada	Mexico	South Africa	Brazil	Turkey	Australia	United Kingdom	Poland	France	Italy	Kazakhstan	Afghanistan	Albania	Algeria	Angola	Antigua and Barbuda	Argentina	Armenia	Austria	Azerbaijan	Bahrain	Barbados	Belarus	Belgium	Belize	Benin	Bolivia	Botswana	Brunei	Bulgaria	Burkina Faso	Burundi	Cameroon	Central African Republic	Chad	Chile	Colombia	Comoros	Congo	Croatia
2000	16607337490	3580636095	48026051644	3542567073	227027215	4.94213e+08	9.86437e+08	1.19664e+08	1448755712	8.08007e+08	1914327357	8.45099e+08	2266976457	2693304956	3.47444e+08	2.39349e+08	7.05656e+08	1106849693	480542338	1421079608	4985821800	9.99006e+07	8.75734e+08	142842418	234279	1307476715	1.05908e+08	7.95507e+07	1.16793e+08	26052.3	545351	4.31409e+08	3.08009e+07	1.3332e+06	3.29483e+08	1.12118e+08	3.95796e+06	16774.2	291931273	701640985	2.35143e+08	2.19972e+08	4.98375e+07	4.07194e+08	2.13016e+08	1.83487e+08	4.36026e+07	3.64311e+07	1.28509e+08
2001	16145954445	3648089048	51616080858	3647200456	2.23293e+08	4.71051e+08	1031691177	1.20422e+08	1223436518	6.61124e+08	1981986441	7.69343e+08	2017687114	3089997851	3.14988e+08	2.28453e+08	7.06355e+08	1244288246	4.75816e+08	1381424615	5792357070	9.20627e+07	8.95101e+08	1.66413e+08	223321	1268290273	1.03554e+08	6.96056e+07	1.17301e+08	26343.6	541162	4.63344e+08	3.02414e+07	1.09287e+06	4.41433e+08	1.15535e+08	2.83486e+06	17166.1	2.7982e+08	1002890095	3.25036e+08	2.26636e+08	5.54573e+07	5.22908e+08	2.03346e+08	1.49016e+08	4.04342e+07	2.7934e+07	1.18472e+08
2002	15243720315	3698986058	51799836466	3541114725	2.16036e+08	4.801e+08	1003978605	1.15944e+08	9.32862e+08	6.09874e+08	1989238657	7.48906e+08	2021788849	3027387109	3.18412e+08	2.41602e+08	6.91496e+08	1278084223	4.65216e+08	1199972234	5065745010	8.52713e+07	853163233	1.55172e+08	213326	1277799359	1.09597e+08	6.8324e+07	1.16448e+08	26557.9	508231	4.02789e+08	3.16086e+07	902010	4.43834e+08	1.14393e+08	1.32342e+06	17385.3	2.83376e+08	1023961459	3.05489e+08	2.34606e+08	6.03695e+07	4.5794e+08	1.90916e+08	1.37817e+08	4.04595e+07	3.31903e+07	1.11641e+08
2003	13585867375	3664213893	51081537336	3264874371	2.14298e+08	4.8238e+08	970927875	114623820	1272865579	5.98163e+08	1961274046	7.14543e+08	2058096852	2852467513	3.50285e+08	2.34286e+08	6.45515e+08	1270126650	4.32427e+08	1125653843	5155091348	8.18377e+07	8.22757e+08	1.5525e+08	201465	1256999878	1.01316e+08	6.35195e+07	1.22084e+08	22992.9	504214	4.25387e+08	3.10138e+07	871591	4.79123e+08	1.28561e+08	1.77785e+06	16781	2.50797e+08	1042375482	3.09714e+08	2.3179e+08	5.37675e+07	4.62865e+08	172891918	138842382	3.95935e+07	2.19166e+07	1.05273e+08
2004	12021800714	3567683144	49037406048	3384515138	215690876	495496292	9.28682e+08	1.08752e+08	1173719097	6.24024e+08	1953135323	6.63197e+08	2059645902	2881973465	3.66535e+08	2.44578e+08	6.39214e+08	1289215867	4.27466e+08	1036248683	5555594386	8.10146e+07	8.09708e+08	1.50621e+08	193630	1274890673	9.46466e+07	6.41906e+07	120614200	21367.4	464637	4.12955e+08	3.16604e+07	1.32224e+06	4.96279e+08	1.14702e+08	6.20153e+06	17397.9	2.549e+08	9.38444e+08	344277088	2.42146e+08	6.0218e+07	464377507	1.61294e+08	1.38488e+08	3.96637e+07	2.0126e+07	1.04808e+08
2005	10837177027	3565176832	47690023448	3295990211	2.13776e+08	5.08964e+08	8.88845e+08	1.06646e+08	1275763328	6.17848e+08	1899302386	6.63167e+08	2097841803	2781834168	4.06577e+08	244789433	6.12195e+08	1297764269	4.17825e+08	9.8703e+08	5506662787	7.67626e+07	7.92256e+08	1.57151e+08	189079	1403364432	8.58068e+07	6.47813e+07	1.14378e+08	20559.5	460036	4.02687e+08	3.29764e+07	1.00614e+06	4.7595e+08	1.28471e+08	2.56103e+06	17663.8	2.41887e+08	1005553181	3.73497e+08	2.40409e+08	5.917e+07	4.68179e+08	1.55594e+08	1.28452e+08	3.52551e+07	1.62795e+07	1.09032e+08
2006	10012315592	3600434452	44870358747	3435231754	2.36536e+08	5.00349e+08	8.41182e+08	1.01791e+08	8.64044e+08	6.81723e+08	1884355103	6.41213e+08	3044363619	2673027095	369774077	2.63392e+08	7.73438e+08	1260745075	4.06454e+08	9.05234e+08	4668708603	9.38736e+07	8.09362e+08	1.88427e+08	161962	1390894285	7.92093e+07	6.4624e+07	122173426	19834.9	450900	4.28462e+08	3.37504e+07	1.27456e+06	4.51161e+08	1.29333e+08	4.1722e+06	16340.2	2.18792e+08	9.39958e+08	1024879021	2.5834e+08	6.18973e+07	336692575	1.45213e+08	1.24415e+08	3.82746e+07	1.80743e+07	9.3855e+07
2007	9291854565	3469799382	42272717107	3469325169	2.27415e+08	516978148	8.11691e+08	9.88093e+07	1167976557	6.72089e+08	1861541800	6.21063e+08	3019303285	2336007590	3.6002e+08	2.71645e+08	7.39032e+08	1285006404	4.03026e+08	884187430	4006220398	8.90546e+07	7.83108e+08	1.70286e+08	154871	1459543843	7.27122e+07	6.6752e+07	127256181	20012.8	451686	4.46533e+08	3.50777e+07	1.00387e+06	4.41724e+08	131624593	1.91463e+06	25891.3	1.97053e+08	9.79773e+08	1167641075	2.59395e+08	6.14592e+07	3.4444e+08	1.22774e+08	1.2883e+08	4.66702e+07	2.05874e+07	8.38263e+07
2008	9030342150	3658433066	41073429634	3119118782	2.43398e+08	5.15848e+08	7.41917e+08	9.01755e+07	1229470813	6.84973e+08	1760738603	5.96168e+08	3112753332	2329090155	4.01112e+08	2.7945e+08	769669029	1308389474	436008433	7.44768e+08	3235160465	9.90615e+07	7.77497e+08	1.99285e+08	150043	1376995865	6.73422e+07	6.67952e+07	1.15528e+08	17266.1	423384	4.13899e+08	3.50271e+07	1.20747e+06	4.63652e+08	1.43765e+08	5.43954e+06	26315	205138716	1217666799	9.99227e+08	2.6362e+08	5.98852e+07	358696707	121885487	119870572	4.46185e+07	2.43759e+07	8.83629e+07
2009	8490465109	3909959209	38369226266	3578915427	2.5768e+08	5.51254e+08	7.26351e+08	8.49622e+07	1069397130	7.51619e+08	1770253891	622857906	3228876831	2310226273	4.47811e+08	3.11253e+08	8.17836e+08	1370287753	4.51562e+08	8.61453e+08	2757210115	9.69842e+07	7.47586e+08	2.34264e+08	143055	1389684586	7.57785e+07	7.3541e+07	1.17218e+08	20456.4	425135	4.33676e+08	3.72723e+07	1.51414e+06	4.59958e+08	1.55467e+08	1.02593e+07	35943.4	2.4134e+08	1158281026	984136158	2.74218e+08	6.84593e+07	3.92294e+08	1.27116e+08	1.1607e+08	43761380	2.73335e+07	1.02267e+08
2010	7795545092	3751590994	37059285098	3400740579	2.44186e+08	5.26532e+08	7.20269e+08	7.95021e+07	1308915077	681101000	1734467096	6.1569e+08	3069942686	2275111722	4.55045e+08	3.02719e+08	6.85345e+08	1367404121	4.48144e+08	7.93886e+08	2388783203	9.6844e+07	7.58789e+08	240965232	141447	1611949368	7.74616e+07	6.83953e+07	1.12122e+08	23950.9	402840	4.02237e+08	3.51337e+07	1.22356e+06	4.60355e+08	1.19552e+08	6.43496e+06	38274.2	2.34278e+08	1215990935	9.88178e+08	2.94326e+08	5.97618e+07	4.14722e+08	1.17889e+08	1.15044e+08	40519405	2.37573e+07	1.1039e+08
2011	7069027805	3671730123	32940107399	3298278672	2.02678e+08	5.51421e+08	6.52568e+08	7.85262e+07	1189131903	7.95201e+08	1691173835	6.17697e+08	3693014788	2134318279	538678950	3.34937e+08	5.5069e+08	1587719380	4.38453e+08	7.72092e+08	1881321041	9.14214e+07	7.19784e+08	2.42229e+08	155366	1634521574	7.35238e+07	7.06969e+07	1.09849e+08	24223	372276	291294154	3.90697e+07	1.61903e+06	4.69446e+08	1.4591e+08	6.41257e+06	42053	2.11386e+08	1255710859	5.68212e+08	3.03196e+08	5.62469e+07	4.36512e+08	2260044748	1.85089e+08	4.31714e+07	2.10773e+07	8.15212e+07
2012	6856708779	3851642053	31637848871	3221699507	194665952	5.41414e+08	6.4639e+08	7.51814e+07	1182836448	7.73477e+08	1648940090	6.00386e+08	3644459393	2085632787	5.47109e+08	3.32253e+08	5.52869e+08	1581386022	4.82985e+08	7.87229e+08	1701583086	9.42961e+07	6.95635e+08	2.98994e+08	154517	1631195310	6.62141e+07	7.33475e+07	1.10055e+08	23912.8	339285	2.78089e+08	3.8507e+07	3.74353e+06	5.03351e+08	1.55593e+08	7.99292e+06	42402.4	2.40596e+08	1338227770	6.60245e+08	3.14329e+08	5.87908e+07	4.81992e+08	4004802765	1.87473e+08	4.25274e+07	2.28259e+07	9.04485e+07
2013	6603094516	3814588664	31450652589	3399253758	1.90126e+08	5.33311e+08	6.23453e+08	7.39813e+07	1212137806	7.2667e+08	1647849676	5.99488e+08	3678440765	2175766809	6.41229e+08	3.48943e+08	5.5426e+08	1587895742	5.06359e+08	7.65307e+08	1547684004	9.31947e+07	6.94628e+08	2.96239e+08	155000	1687912048	6.68552e+07	7.31263e+07	1.13646e+08	22598.3	322998	2.84182e+08	3.90249e+07	1.65889e+06	5.27454e+08	1.62271e+08	4.09149e+06	54339	2.80771e+08	1384253376	6.83701e+08	3.07785e+08	5.59881e+07	5.43052e+08	38608993756	1.91351e+08	4.11872e+07	2.34587e+07	9.22606e+07
2014	6618600534	3829721673	30115255934	3405150535	1.94655e+08	5.6208e+08	6.22635e+08	7.92213e+07	1031381709	7.7307e+08	1649113401	5.91e+08	3633810803	2073784671	6.55519e+08	3.77796e+08	5.82702e+08	1759938721	5.301e+08	8.25582e+08	1407419017	8.7898e+07	670458742	3.38167e+08	153997	1680438776	6.72394e+07	7.73873e+07	1.14763e+08	21889.5	321283	2.86386e+08	4.1538e+07	3.61855e+06	531298433	162253171	1.14983e+07	55342.4	2.64311e+08	1373374908	7.3055e+08	3.25703e+08	5.59096e+07	5.88747e+08	1894468217	1.87578e+08	4.21807e+07	3.80282e+07	8.86819e+07
2015	6653427258	3956481024	30314910986	3556071868	1.98376e+08	5.62238e+08	6.34929e+08	7.87588e+07	1040007737	7.45426e+08	1741376420	6.30572e+08	3715955427	2064934107	6.48881e+08	3.79598e+08	5.73471e+08	1744554815	5.04322e+08	854238867	1342678692	8.95487e+07	6.55657e+08	3.11691e+08	130299	1688796816	7.0357e+07	7.64855e+07	1.18964e+08	21963.6	251835	3.00735e+08	4.04921e+07	2.8653e+06	5.27966e+08	1.59358e+08	1.96248e+06	58807.7	2.5054e+08	1369956000	7.79627e+08	3.27188e+08	5.36668e+07	3.56016e+08	19454504263	1.93644e+08	4.02548e+07	2.62122e+07	8.84293e+07
2016	6689293269	4089975260	30093400166	3451053710	1.97593e+08	562901056	6.32773e+08	7.98959e+07	1389792846	839131894	1866625330	6.37304e+08	3873392813	1931191812	6.58344e+08	402623369	5.51359e+08	1746503527	5.16274e+08	8.57739e+08	1330715522	9.12406e+07	671701802	3.68778e+08	128776	1665924618	6.51191e+07	7.68377e+07	123922102	22778.7	216154	314526207	4.21398e+07	3.13519e+06	5.393e+08	1.5245e+08	3.76538e+06	58722	2.65756e+08	1361190421	7.64242e+08	3.3459e+08	5.06917e+07	3.49012e+08	2905690117	1.71398e+08	4.05089e+07	2.58708e+07	9.05353e+07
Average	9973678355	3725243586	40555772270	3412417749	217495942	520972346	7.92042e+08	9.4521e+07	1177205514	708442516	1820923497	6.57511e+08	2955079454	2453885668	4.60457e+08	2.96333e+08	6.55947e+08	1416832940	4.60175e+08	9.53125e+08	3431103326	9.06039e+07	7.66643e+08	2.24516e+08	169673	1470981084	8.13319e+07	7.04683e+07	1.17242e+08	22515.3	411847	377564079	3.56079e+07	1.72895e+06	4.73045e+08	1.37139e+08	4.85885e+06	32799.9	2.47804e+08	1135838180	6.614e+08	2.74015e+08	5.77398e+07	4.34449e+08	4168261138	1.52757e+08	4.13343e+07	2.51458e+07	9.93125e+07
Poultry meat eco-potential GWP (RIW weighted)	China	United States	India	Russian Federation	Japan	Germany	Islamic Republic of Iran	Saudi Arabia	Indonesia	Canada	Mexico	South Africa	Brazil	Turkey	Australia	United Kingdom	Poland	France	Italy	Kazakhstan	Afghanistan	Albania	Algeria	Angola	Antigua and Barbuda	Argentina	Armenia	Austria	Azerbaijan	Bahrain	Barbados	Belarus	Belgium	Belize	Benin	Bolivia	Botswana	Brunei	Bulgaria	Burkina Faso	Burundi	Cameroon	Central African Republic	Chad	Chile	Colombia	Comoros	Congo	Croatia
2000	20140813552	4342473562	58244360505	4296304748	2.75331e+08	599365080	1196316797	1.45124e+08	1757001608	9.79924e+08	2321631050	1024907563	2749311873	3266348564	4.21369e+08	2.90274e+08	8.55796e+08	1342349628	5.82785e+08	1723436971	6046634948	1.21156e+08	1062060279	1.73234e+08	284125	1585663250	128442103	9.64763e+07	1.41642e+08	31595.4	661383	523197667	3.73543e+07	1.61686e+06	3.99586e+08	1.35973e+08	4.80008e+06	20343.2	3.54044e+08	8.50926e+08	2.85173e+08	2.66775e+08	6.04412e+07	493830703	2.58339e+08	2.22527e+08	5.28798e+07	4.41824e+07	1.55852e+08
2001	19581263902	4424278207	62598225721	4423200553	2.70802e+08	5.71274e+08	1251199938	1.46044e+08	1483742160	8.01788e+08	2403685683	9.33034e+08	2446982245	3747444202	3.82007e+08	2.7706e+08	8.56644e+08	1509030426	5.77053e+08	1675344745	7024773468	1.11651e+08	1085548139	201819457	270836	1538139267	1.25587e+08	8.44152e+07	1.42259e+08	31948.6	656303	5.61928e+08	3.66757e+07	1.3254e+06	5.35355e+08	1.40117e+08	3.43802e+06	20818.4	3.39356e+08	1216270967	3.94193e+08	2.74856e+08	6.72568e+07	6.34165e+08	2.46611e+08	1.80722e+08	4.90373e+07	3.38774e+07	1.43679e+08
2002	18487065062	4486004368	62821078267	4294543389	2.62002e+08	5.82249e+08	1217591074	1.40613e+08	1131343221	7.39635e+08	2412480924	9.08247e+08	2451956689	3671512026	3.86159e+08	2.93007e+08	838623056	1550017037	5.64199e+08	1455285475	6143563098	1.03414e+08	1034687325	1.88187e+08	258714	1549671563	1.32916e+08	8.28611e+07	1.41224e+08	32208.5	616365	4.88489e+08	3.83339e+07	1.09393e+06	5.38267e+08	1.38732e+08	1.605e+06	21084.3	3.43669e+08	1241825600	3.70486e+08	2.84522e+08	7.32141e+07	5.55374e+08	2.31536e+08	1.67139e+08	4.90679e+07	4.02521e+07	1.35394e+08
2003	16476477455	4443833870	61949949535	3959528493	2.59894e+08	5.85014e+08	1177508274	1.39012e+08	1543688043	7.25431e+08	2378566396	8.66574e+08	2495989799	3459375494	4.24814e+08	2.84134e+08	7.82858e+08	1540366363	5.24433e+08	1365154660	6251919295	9.92499e+07	9.97811e+08	1.88282e+08	244330	1524446660	1.22873e+08	7.70342e+07	1.48059e+08	27885	611493	515894397	3.76125e+07	1.05704e+06	5.81064e+08	1.55915e+08	2.15612e+06	20351.4	3.04158e+08	1264157500	3.7561e+08	2.81107e+08	6.52074e+07	5.61346e+08	2.09677e+08	1.68383e+08	4.80177e+07	2.65797e+07	1.27671e+08
2004	14579630654	4326764664	59470896697	4104624742	2.61583e+08	600921035	1126273481	131890202	1423446564	7.56796e+08	2368696030	804302177	2497868434	3495159308	4.44521e+08	2.96616e+08	7.75217e+08	1563517115	5.18416e+08	1256727127	6737635744	9.82518e+07	9.81986e+08	1.82668e+08	234828	1546144008	1.14784e+08	7.78482e+07	1.46277e+08	25913.7	563496	5.00817e+08	3.83966e+07	1.60356e+06	6.0187e+08	1.39106e+08	7.521e+06	21099.6	3.09134e+08	1138112989	4.17528e+08	2.93666e+08	7.30303e+07	5.63181e+08	1.95611e+08	167953596	4.81028e+07	2.44081e+07	1.27108e+08
2005	13142959373	4323725094	57836836948	3997264724	2.5926e+08	6.17254e+08	1077961408	1.29337e+08	1547202335	7.49305e+08	2303409277	8.04266e+08	2544191122	3373713778	4.93083e+08	2.96872e+08	7.4245e+08	1573884327	5.06725e+08	1197035932	6678293167	9.3095e+07	9.60821e+08	1.90587e+08	229309	1701952609	1.04064e+08	7.85646e+07	1.38714e+08	24933.9	557916	4.88366e+08	3.99927e+07	1.22022e+06	5.77216e+08	1.55805e+08	3.10593e+06	21422	2.93352e+08	1219500667	4.52964e+08	2.9156e+08	7.17594e+07	5.67792e+08	1.88699e+08	1.55782e+08	4.27562e+07	1.97432e+07	1.3223e+08
2006	12142595505	4366484335	54417243586	4166132127	2.86862e+08	6.06806e+08	1020157017	1.23449e+08	1047882568	8.26771e+08	2285281721	7.77642e+08	3692100559	3241756264	4.48449e+08	3.19433e+08	937998948	1528988708	4.92934e+08	1097836771	5662050860	113846748	9.81567e+08	2.28518e+08	196422	1686829240	9.60624e+07	7.83738e+07	1.48168e+08	24055	546836	519623591	4.09313e+07	1.54575e+06	5.47153e+08	1.5685e+08	5.0599e+06	19816.9	2.65343e+08	1139949616	1242938388	3.13306e+08	7.50669e+07	408329293	1.7611e+08	1.50886e+08	4.64181e+07	2.19199e+07	1.13824e+08
2007	11268844898	4208054570	51266912236	4207479460	2.75802e+08	6.26973e+08	9.84391e+08	1.19833e+08	1416482207	8.15087e+08	2257614523	7.53204e+08	3661708239	2833030482	4.3662e+08	3.29441e+08	8.96273e+08	1558412022	4.88776e+08	1072312415	4858607717	1.08002e+08	949726266	2.06517e+08	187823	1770085086	8.81828e+07	8.09545e+07	1.54332e+08	24270.8	547790	5.4154e+08	4.25411e+07	1.21746e+06	5.35708e+08	1.5963e+08	2.322e+06	31400.1	2.38979e+08	1188235661	1416075347	3.14585e+08	7.45357e+07	4.17726e+08	1.48896e+08	1.5624e+08	56600050	2.49677e+07	1.01662e+08
2008	10951691543	4436823080	49812457216	3782761076	2.95185e+08	6.25603e+08	8.99771e+08	1.09362e+08	1491060348	8.30712e+08	2135363838	7.23013e+08	3775041275	2824641251	4.86454e+08	3.38907e+08	9.33428e+08	1586770213	5.28776e+08	9.03229e+08	3923492479	1.20138e+08	9.42922e+08	2.41686e+08	181967	1669973708	8.16703e+07	8.10069e+07	1.40108e+08	20939.7	513465	5.01963e+08	4.24796e+07	1.46438e+06	5.62301e+08	1.74354e+08	6.59688e+06	31913.9	2.48785e+08	1476744841	1211828583	3.19709e+08	7.26268e+07	4.35015e+08	1.47819e+08	145374949	5.41119e+07	2.95622e+07	1.07164e+08
2009	10296947047	4741865424	46532891429	4340386794	3.12505e+08	6.68542e+08	8.80894e+08	1.03039e+08	1296928434	911537463	2146903655	7.55381e+08	3915871901	2801763778	5.4309e+08	3.77477e+08	991843613	1661838339	5.47639e+08	1044741239	3343850565	1.17619e+08	9.06647e+08	2.84108e+08	173492	1685362158	9.19016e+07	8.9188e+07	1.42158e+08	24808.8	515589	5.25948e+08	4.52025e+07	1.8363e+06	5.57821e+08	1.88545e+08	1.24422e+07	43590.9	2.92689e+08	1404723798	1193526830	3.32563e+08	8.30251e+07	4.75761e+08	1.54162e+08	1.40766e+08	5.30723e+07	3.31492e+07	1.24026e+08
2010	9454171707	4549801844	44944239375	4124302404	2.96141e+08	6.3856e+08	8.73518e+08	9.64174e+07	1587407646	8.26016e+08	2103502648	7.46687e+08	3723121981	2759178046	5.51863e+08	3.67128e+08	8.31163e+08	1658341168	5.43493e+08	9.62798e+08	2897034949	1.17449e+08	9.20233e+08	2.92234e+08	171542	1954917319	9.39428e+07	8.29475e+07	1.35978e+08	29046.8	488551	4.87819e+08	4.26089e+07	1.48389e+06	5.58303e+08	1.44989e+08	7.80411e+06	46417.6	2.84124e+08	1474712411	1198428184	3.56949e+08	7.2477e+07	5.0296e+08	1.42971e+08	1.39521e+08	49140555	2.8812e+07	1.33877e+08
2011	8573076275	4452949298	39948640888	4000040091	2.45801e+08	6.68744e+08	7.91412e+08	9.52339e+07	1442138691	9.64393e+08	2050998055	7.49122e+08	4478762616	2588428551	6.53291e+08	4.06201e+08	6.67858e+08	1925532014	5.31741e+08	9.36367e+08	2281602113	1.10873e+08	8.7293e+08	2.93767e+08	188423	1982292121	8.91671e+07	85738805	1.33221e+08	29376.9	451483	3.53272e+08	4.73824e+07	1.96351e+06	5.69328e+08	1.76954e+08	7.77694e+06	51000.5	2.56361e+08	1522883382	6.89108e+08	3.67706e+08	6.82143e+07	5.29386e+08	2740905332	2.2447e+08	5.23568e+07	2.55618e+07	9.88661e+07
2012	8315582988	4671140362	38369306077	3907167488	2.36084e+08	6.56608e+08	7.8392e+08	9.11774e+07	1434503777	9.38047e+08	1999778407	728128212	4419876285	2529384444	663515689	402944600	6.70501e+08	1917851133	5.85747e+08	9.54724e+08	2063622041	1.14359e+08	8.43643e+08	3.6261e+08	187393	1978258142	8.03022e+07	8.89533e+07	1.33471e+08	29000.7	411473	3.37257e+08	4.66999e+07	4.54002e+06	6.10446e+08	1.88698e+08	9.69354e+06	51424.2	2.91786e+08	1622957082	8.00723e+08	3.81208e+08	7.12995e+07	5.84543e+08	4856888460	2.2736e+08	5.15758e+07	2.76825e+07	1.09693e+08
2013	8008008243	4626203273	38142280800	4122499239	2.30578e+08	6.46781e+08	7.56103e+08	8.9722e+07	1470039467	8.81281e+08	1998455990	7.27038e+08	4461087736	2638695917	7.77661e+08	4.23186e+08	6.72188e+08	1925745900	6.14095e+08	9.28138e+08	1876978473	1.13023e+08	8.42422e+08	359268596	187979	2047042271	8.10797e+07	8.86851e+07	1.37826e+08	27406.5	391721	3.44646e+08	4.7328e+07	2.01184e+06	6.39678e+08	1.96797e+08	4.96203e+06	65900.5	3.40509e+08	1678775371	8.29169e+08	3.73271e+08	6.79004e+07	6.58595e+08	46823673278	2.32064e+08	4.99505e+07	2.84499e+07	1.11891e+08
2014	8026813413	4644556072	36522757196	4129650649	2.36071e+08	6.81672e+08	7.5511e+08	9.60769e+07	1250824625	9.37553e+08	1999988593	7.16745e+08	4406962038	2515015452	7.94991e+08	4.58178e+08	7.06681e+08	2134393768	6.42888e+08	1001237212	1706869872	1.066e+08	8.1311e+08	4.10118e+08	186762	2037978941	8.15457e+07	9.38527e+07	1.3918e+08	26546.8	389641	3.47319e+08	5.03759e+07	4.38845e+06	6.44341e+08	1.96775e+08	1.39448e+07	67117.3	3.20547e+08	1665582336	885986730	3.95002e+08	6.78052e+07	7.14012e+08	2297546561	2.27489e+08	5.11553e+07	4.61193e+07	1.0755e+08
2015	8069050079	4798285497	36764892047	4312682904	2.40584e+08	6.81863e+08	7.7002e+08	9.5516e+07	1261285979	9.04028e+08	2111882041	7.64736e+08	4506584241	2504281790	7.86941e+08	4.60363e+08	6.95486e+08	2115736691	6.11625e+08	1035991817	1628355009	1.08602e+08	7.95158e+08	3.78008e+08	158023	2048115287	8.53266e+07	9.2759e+07	1.44275e+08	26636.7	305417	3.64721e+08	4.91074e+07	3.47493e+06	6.40299e+08	193264214	2.38003e+06	71320	3.03846e+08	1661436000	9.45505e+08	3.96802e+08	6.50853e+07	4.31763e+08	23593760489	2.34844e+08	4.88196e+07	3.17892e+07	1.07244e+08
2016	8112547156	4960182762	36496251265	4185320457	2.39634e+08	6.82667e+08	7.67406e+08	9.6895e+07	1685493451	1017670595	2263779655	7.72901e+08	4697518944	2342083687	7.98417e+08	4.88288e+08	6.68669e+08	2118100023	6.2612e+08	1040237057	1613846484	1.10654e+08	814617079	4.47241e+08	156175	2020376665	7.89743e+07	9.31862e+07	1.50289e+08	27625.3	262144	3.81447e+08	51105716	3.80225e+06	6.54045e+08	1.84886e+08	4.56653e+06	71216.1	3.223e+08	1650805404	9.26846e+08	4.0578e+08	6.14772e+07	4.23269e+08	3523922057	2.07866e+08	49127806	3.13752e+07	1.09798e+08
Average	12095737579	4517848605	49184659988	4138464079	2.63772e+08	6.31818e+08	9.60562e+08	1.14632e+08	1427674772	8.59175e+08	2208354029	7.97407e+08	3583819763	2975989002	5.58426e+08	3.59383e+08	7.9551e+08	1718286757	5.58085e+08	1155917562	4161125311	1.09881e+08	9.29758e+08	2.72285e+08	205773	1783955782	9.86365e+07	8.54615e+07	1.42187e+08	27305.8	499474	4.57897e+08	4.3184e+07	2.09681e+06	5.73693e+08	1.66317e+08	5.89265e+06	39778.7	3.00528e+08	1377505878	8.02123e+08	3.32316e+08	7.00249e+07	526885334	5055125209	1.85258e+08	5.01288e+07	3.0496e+07	1.20443e+08
Ground nuts eco-potential GWP (RIW weighted)	China	United States	India	Russian Federation	Japan	Germany	Islamic Republic of Iran	Saudi Arabia	Indonesia	Canada	Mexico	South Africa	Brazil	Turkey	Australia	United Kingdom	Poland	France	Italy	Kazakhstan	Afghanistan	Albania	Algeria	Angola	Antigua and Barbuda	Argentina	Armenia	Austria	Azerbaijan	Bahrain	Barbados	Belarus	Belgium	Belize	Benin	Bolivia	Botswana	Brunei	Bulgaria	Burkina Faso	Burundi	Cameroon	Central African Republic	Chad	Chile	Colombia	Comoros	Congo	Croatia
2000	4240171274	9.14205e+08	12261970633	904485210	5.79644e+07	1.26182e+08	2.51856e+08	3.05524e+07	3.69895e+08	2.063e+08	4.88764e+08	2.1577e+08	5.78802e+08	6.87652e+08	8.87092e+07	6.11103e+07	1.80168e+08	2.826e+08	1.22692e+08	362828836	1272975779	2.55065e+07	2.23592e+08	3.64704e+07	59815.9	3.33824e+08	2.70404e+07	2.03108e+07	2.98194e+07	6651.65	139238	1.10147e+08	7.86406e+06	340391	8.41234e+07	2.86259e+07	1.01054e+06	4282.79	7.45356e+07	1.79142e+08	6.00364e+07	5.61631e+07	1.27245e+07	1.03964e+08	5.43871e+07	4.68478e+07	1.11326e+07	9.30156e+06	3.28108e+07
2001	4122371348	9.31427e+08	13178573836	9.312e+08	5.7011e+07	1.20268e+08	2.63411e+08	3.0746e+07	3.12367e+08	1.68798e+08	5.06039e+08	1.96428e+08	5.15154e+08	7.88936e+08	8.04225e+07	5.83283e+07	1.80346e+08	317690616	1.21485e+08	3.52704e+08	1478899678	2.35054e+07	2.28536e+08	4.24883e+07	57018.1	3.23819e+08	2.64393e+07	17771631	2.99492e+07	6726.03	138169	1.18301e+08	7.72121e+06	279031	1.12706e+08	2.94982e+07	723794	4382.82	7.14435e+07	2.56057e+08	8.29879e+07	5.78645e+07	1.41593e+07	1.33508e+08	5.19182e+07	3.80467e+07	1.03236e+07	7.13209e+06	3.02482e+07
2002	3892013697	9.44422e+08	13225490161	9.04114e+08	5.51582e+07	1.22579e+08	2.56335e+08	2.96028e+07	2.38178e+08	1.55713e+08	5.07891e+08	1.9121e+08	5.16201e+08	7.7295e+08	8.12966e+07	6.16857e+07	1.76552e+08	3.26319e+08	118778671	3.06376e+08	1293381705	2.17714e+07	2.17829e+08	3.96184e+07	54466.1	3.26247e+08	2.79823e+07	1.74444e+07	2.97313e+07	6780.75	129761	1.0284e+08	8.07029e+06	230300	113319318	2.92066e+07	337894	4438.81	7.23513e+07	2.61437e+08	7.79971e+07	5.98994e+07	1.54135e+07	1.16921e+08	4.87445e+07	3.51872e+07	1.03301e+07	8.47413e+06	2.8504e+07
2003	3468732096	9.35544e+08	13042094639	8.33585e+08	5.47145e+07	1.23161e+08	2.47896e+08	2.92657e+07	3.24987e+08	1.52722e+08	5.00751e+08	1.82437e+08	5.25472e+08	7.2829e+08	8.94345e+07	5.98176e+07	1.64812e+08	3.24288e+08	1.10407e+08	2.87401e+08	1316193536	2.08947e+07	2.10066e+08	3.96382e+07	51437.8	320936139	2.5868e+07	1.62177e+07	3.11703e+07	5870.53	128735	1.08609e+08	7.91842e+06	222534	1.22329e+08	3.28241e+07	453919	4284.5	6.40332e+07	266138421	7.90759e+07	5.91804e+07	1.37279e+07	1.18178e+08	4.41426e+07	3.54491e+07	1.0109e+07	5.59573e+06	2.68781e+07
2004	3069395927	9.10898e+08	12520188778	8.64132e+08	5.507e+07	1.2651e+08	2.3711e+08	2.77664e+07	2.99673e+08	1.59325e+08	4.98673e+08	1.69327e+08	5.25867e+08	7.35823e+08	9.35833e+07	6.24454e+07	1.63204e+08	3.29161e+08	1.0914e+08	2.64574e+08	1418449630	2.06846e+07	206733844	3.84563e+07	49437.5	3.25504e+08	2.41651e+07	1.63891e+07	3.07951e+07	5455.51	118631	1.05435e+08	8.0835e+06	337592	126709577	2.92855e+07	1.58337e+06	4442.01	6.50809e+07	2.39603e+08	8.79005e+07	6.18244e+07	1.53748e+07	1.18564e+08	41181354	3.53587e+07	1.01269e+07	5.13855e+06	2.67596e+07
2005	2766938815	9.10258e+08	12176176199	8.41529e+08	5.4581e+07	129948288	2.26939e+08	2.72289e+07	3.25727e+08	157748505	4.84928e+08	169319205	5.35619e+08	7.10256e+08	1.03807e+08	6.24994e+07	1.56305e+08	3.31344e+08	1.06679e+08	2.52008e+08	1405956456	1.9599e+07	202278175	4.01236e+07	48275.6	3.58306e+08	2.19081e+07	1.65399e+07	2.9203e+07	5249.25	117456	1.02814e+08	8.41951e+06	256888	1.21519e+08	3.28011e+07	653880	4509.9	6.17584e+07	2.56737e+08	9.53608e+07	6.13811e+07	1.51072e+07	119535144	3.97262e+07	3.27962e+07	9.0013e+06	4.15647e+06	2.78379e+07
2006	2556335896	9.1926e+08	11456261808	8.7708e+08	6.03921e+07	1.27749e+08	2.1477e+08	2.59892e+07	2.20607e+08	1.74057e+08	4.81112e+08	1.63714e+08	7.77284e+08	682475003	9.44104e+07	6.72491e+07	1.97473e+08	3.21892e+08	1.03776e+08	2.31124e+08	1192010707	2.39677e+07	2.06646e+08	4.8109e+07	41352	3.55122e+08	2.02237e+07	1.64997e+07	3.11932e+07	5064.22	115123	1.09394e+08	8.61712e+06	325421	1.1519e+08	3.30211e+07	1.06524e+06	4171.98	5.58617e+07	2.39989e+08	2.61671e+08	6.59592e+07	1.58036e+07	8.59641e+07	3.70757e+07	3.17654e+07	9772230	4.61472e+06	2.3963e+07
2007	2372388400	8.85906e+08	10793034155	8.85785e+08	5.80635e+07	1.31994e+08	2.0724e+08	2.52279e+07	2.98207e+08	1.71597e+08	475287268	1.58569e+08	770885945	5.96427e+08	9.19201e+07	6.93561e+07	1.88689e+08	3.28087e+08	1.029e+08	2.2575e+08	1022864782	2.27373e+07	1.99942e+08	4.34774e+07	39541.6	3.72649e+08	1.85648e+07	1.70431e+07	3.24909e+07	5109.64	115324	1.14008e+08	8.95601e+06	256307	1.12781e+08	3.36063e+07	488841	6610.55	5.03113e+07	2.50155e+08	2.98121e+08	6.62284e+07	1.56917e+07	8.79422e+07	3.13465e+07	3.28927e+07	11915800	5.25636e+06	2.14025e+07
2008	2305619272	9.34068e+08	10486833098	7.96371e+08	6.21442e+07	1.31706e+08	1.89425e+08	2.30235e+07	3.13907e+08	1.74887e+08	4.4955e+08	1.52213e+08	7.94746e+08	5.94661e+08	1.02411e+08	7.13489e+07	1.96511e+08	3.34057e+08	111321302	1.90154e+08	8.25998e+08	2.52923e+07	1.9851e+08	5.08813e+07	38308.9	3.51573e+08	1.71938e+07	1.70541e+07	2.94964e+07	4408.36	108098	1.05676e+08	8.94308e+06	308291	1.18379e+08	3.67061e+07	1.38882e+06	6718.72	5.23758e+07	3.10894e+08	255121807	6.73072e+07	1.52898e+07	9.15821e+07	3.11197e+07	3.06053e+07	1.1392e+07	6.22362e+06	2.25607e+07
2009	2167778326	9.98287e+08	9796398196	9.13766e+08	6.57906e+07	1.40746e+08	1.85451e+08	2.16925e+07	2.73038e+08	1.91903e+08	4.5198e+08	1.59028e+08	8.24394e+08	5.89845e+08	1.14335e+08	7.94689e+07	2.08809e+08	349860703	1.15292e+08	219945524	7.03969e+08	2.47619e+07	1.90873e+08	5.98121e+07	36524.6	3.54813e+08	1.93477e+07	1.87764e+07	2.99279e+07	5222.91	108545	1.10726e+08	9.51632e+06	386589	1.17436e+08	3.96936e+07	2.6194e+06	9177.04	6.16186e+07	2.95731e+08	2.51269e+08	7.00132e+07	1.7479e+07	1.0016e+08	3.24552e+07	2.96349e+07	1.11731e+07	6.97877e+06	2.61107e+07
2010	1990351938	9.57853e+08	9461945132	8.68274e+08	6.23454e+07	1.34434e+08	1.83898e+08	2.02984e+07	3.34191e+08	1.73898e+08	4.42843e+08	1.57197e+08	7.83815e+08	5.8088e+08	1.16182e+08	7.72901e+07	174981771	3.49124e+08	1.1442e+08	2.02694e+08	6.09902e+08	2.47261e+07	1.93733e+08	6.1523e+07	36114.1	4.11562e+08	1.97774e+07	1.74626e+07	2.86269e+07	6115.12	102853	1.02699e+08	8.9703e+06	312398	1.17537e+08	3.0524e+07	1.64297e+06	9772.14	5.98156e+07	3.10466e+08	2.52301e+08	7.51471e+07	1.52583e+07	1.05886e+08	3.00992e+07	2.93728e+07	10345380	6065685	2.81846e+07
2011	1804858163	9.37463e+08	8410240187	8.42114e+08	5.17475e+07	1.40788e+08	1.66613e+08	2.00492e+07	3.03608e+08	203030131	4.31789e+08	1.5771e+08	9.42897e+08	5.44932e+08	1.37535e+08	8.5516e+07	1.40602e+08	4.05375e+08	1.11946e+08	1.9713e+08	480337287	2.33416e+07	1.83775e+08	6.18456e+07	39668	4.17325e+08	1.8772e+07	1.80503e+07	28046503	6184.6	95049.1	7.4373e+07	9.97525e+06	413370	1.19858e+08	3.72536e+07	1.63725e+06	10736.9	5.39708e+07	3.20607e+08	1.45075e+08	7.74118e+07	1.43609e+07	1.1145e+08	5.77033e+08	4.72568e+07	1.10225e+07	5.38144e+06	20813920
2012	1750649050	983397971	8077748648	8.22562e+08	4.97019e+07	1.38233e+08	1.65036e+08	1.91953e+07	3.02001e+08	197483559	4.21006e+08	1.5329e+08	9.305e+08	5.32502e+08	1.39688e+08	8.48304e+07	1.41158e+08	4.03758e+08	1.23315e+08	200994573	4.34447e+08	2.40756e+07	1.77609e+08	7.63389e+07	39451.2	4.16475e+08	1.69057e+07	1.8727e+07	2.80992e+07	6105.41	86626	7.10014e+07	9.83156e+06	955795	1.28515e+08	3.97259e+07	2.04074e+06	10826.2	6.14287e+07	3.41675e+08	1.68573e+08	8.02542e+07	1.50104e+07	1.23062e+08	1022502834	4.78654e+07	10858065	5.82789e+06	2.30932e+07
2013	1685896472	9.73938e+08	8029953853	8.67895e+08	4.85428e+07	1.36165e+08	159179551	1.88888e+07	309481993	1.85533e+08	4.20728e+08	1.53061e+08	9.39176e+08	5.55515e+08	1.63718e+08	8.90918e+07	1.41513e+08	4.0542e+08	129283082	195397476	3.95153e+08	2.37944e+07	1.77352e+08	7.56355e+07	39574.5	4.30956e+08	1.70694e+07	1.86705e+07	2.9016e+07	5769.78	82467.5	7.25571e+07	9.96379e+06	423546	134669153	4.14309e+07	1.04464e+06	13873.8	7.16861e+07	353426394	1.74562e+08	7.85834e+07	1.42948e+07	1.38652e+08	9857615427	4.88555e+07	1.05159e+07	5.98944e+06	2.35559e+07
2014	1689855455	9.77801e+08	7689001515	8.694e+08	4.96991e+07	143509873	1.58971e+08	2.02267e+07	2.63332e+08	1.97379e+08	421050230	1.50894e+08	9.27781e+08	5.29477e+08	1.67366e+08	9.64586e+07	1.48775e+08	4.49346e+08	1.35345e+08	2.10787e+08	3.59341e+08	2.2442e+07	1.71181e+08	8.63406e+07	39318.4	429048198	1.71675e+07	1.97585e+07	2.93011e+07	5588.81	82029.6	7.31199e+07	1.06054e+07	923884	1.35651e+08	4.14263e+07	2.93574e+06	14130	6.74836e+07	3.50649e+08	1.86524e+08	8.31582e+07	1.42748e+07	1.50318e+08	4.83694e+08	4.78923e+07	1.07695e+07	9.70933e+06	2.26422e+07
2015	1698747385	1010165368	7739977273	907933243	50649226	1.4355e+08	1.6211e+08	2.01086e+07	2.65534e+08	1.90322e+08	4.44607e+08	1.60997e+08	948754577	5.27217e+08	1.65672e+08	9.69185e+07	146418151	4.45418e+08	1.28763e+08	2.18104e+08	3.42812e+08	2.28635e+07	1.67402e+08	7.95807e+07	33267.9	4.31182e+08	1.79635e+07	1.95282e+07	3.03737e+07	5607.74	64298.4	7.67834e+07	1.03384e+07	731565	1.348e+08	4.06872e+07	501058	15014.7	6.39677e+07	349776000	199053649	8.35373e+07	1.37022e+07	9.08976e+07	4967107471	4.94409e+07	1.02778e+07	6.69247e+06	2.25777e+07
2016	1707904665	1044249003	7683421319	8.8112e+08	5.04493e+07	1.43719e+08	161559063	2.0399e+07	3.54841e+08	214246441	4.76585e+08	1.62716e+08	9.88951e+08	4.9307e+08	1.68088e+08	1.02797e+08	1.40772e+08	4.45916e+08	1.31815e+08	2.18997e+08	3.39757e+08	2.32955e+07	1.71498e+08	9.4156e+07	32879	4.25342e+08	1.66262e+07	1.96181e+07	3.16397e+07	5815.85	55188.2	8.03046e+07	1.07591e+07	800474	1.37694e+08	3.89234e+07	961374	14992.9	6.78526e+07	3.47538e+08	1.95126e+08	8.54273e+07	1.29426e+07	8.91093e+07	7.41878e+08	4.37612e+07	10342696	6.6053e+06	2.31154e+07
Average	2546471069	9.51126e+08	10354665261	8.71256e+08	5.55309e+07	133014216	2.02224e+08	2.4133e+07	3.00563e+08	1.80879e+08	4.64917e+08	1.67875e+08	7.54488e+08	6.26524e+08	1.17563e+08	7.56596e+07	1.67476e+08	3.61745e+08	1.17492e+08	2.43351e+08	8.76026e+08	2.31329e+07	195738550	5.73233e+07	43320.7	3.7557e+08	2.07656e+07	1.79919e+07	2.99341e+07	5748.6	105153	9.63993e+07	9.09137e+06	441434	1.20777e+08	3.50141e+07	1.24056e+06	8374.45	6.32692e+07	2.90001e+08	1.68868e+08	6.99612e+07	1.47421e+07	1.10923e+08	1064236886	3.90017e+07	1.05534e+07	6.42021e+06	2.53564e+07
Fish (Farmed) eco-potential GWP (RIW weighted)	China	United States	India	Russian Federation	Japan	Germany	Islamic Republic of Iran	Saudi Arabia	Indonesia	Canada	Mexico	South Africa	Brazil	Turkey	Australia	United Kingdom	Poland	France	Italy	Kazakhstan	Afghanistan	Albania	Algeria	Angola	Antigua and Barbuda	Argentina	Armenia	Austria	Azerbaijan	Bahrain	Barbados	Belarus	Belgium	Belize	Benin	Bolivia	Botswana	Brunei	Bulgaria	Burkina Faso	Burundi	Cameroon	Central African Republic	Chad	Chile	Colombia	Comoros	Congo	Croatia
2000	21200856370	4571024803	61309853163	4522426050	2.89822e+08	6.30911e+08	1259280839	1.52762e+08	1849475377	1031498737	2443822158	1078850066	2894012498	3438261647	4.43546e+08	3.05552e+08	9.00838e+08	1412999608	6.13458e+08	1814144180	6364878893	1.27533e+08	1117958188	182352023	299079	1669119211	1.35202e+08	1.01554e+08	1.49097e+08	33258.3	696192	5.50734e+08	3.93203e+07	1.70195e+06	420616818	1.43129e+08	5.05271e+06	21413.9	3.72678e+08	8.95712e+08	3.00182e+08	2.80815e+08	6.36223e+07	5.19822e+08	2.71936e+08	234238778	5.5663e+07	4.65078e+07	1.64054e+08
2001	20611856739	4657134954	65892869180	4656000582	2.85055e+08	6.01341e+08	1317052566	1.5373e+08	1561833853	8.43988e+08	2530195456	982140557	2575770784	3944678107	4.02112e+08	2.91642e+08	9.0173e+08	1588453080	6.07424e+08	1763520785	7394498388	1.17527e+08	1142682252	2.12442e+08	285090	1619093966	1.32196e+08	88858155	1.49746e+08	33630.1	690845	5.91503e+08	3.8606e+07	1.39516e+06	5.63532e+08	1.47491e+08	3.61897e+06	21914.1	3.57217e+08	1280285228	4.1494e+08	2.89322e+08	7.07966e+07	6.67542e+08	2.59591e+08	1.90234e+08	5.16182e+07	3.56605e+07	1.51241e+08
2002	19460068487	4722109861	66127450807	4520571989	2.75791e+08	6.12894e+08	1281674814	148013815	1190887601	7.78563e+08	2539453604	9.5605e+08	2581007041	3864749501	4.06483e+08	3.08429e+08	8.82761e+08	1631596881	593893355	1531879448	6466908524	1.08857e+08	1089144553	1.98092e+08	272330	1631233225	1.39911e+08	8.72222e+07	1.48657e+08	33903.7	648805	5.14199e+08	4.03515e+07	1.1515e+06	5.66597e+08	1.46033e+08	1.68947e+06	22194	3.61757e+08	1307184842	3.89986e+08	2.99497e+08	7.70675e+07	5.84604e+08	2.43723e+08	1.75936e+08	5.16504e+07	4.23706e+07	1.4252e+08
2003	17343660479	4677719863	65210473195	4167924729	2.73573e+08	6.15804e+08	1239482394	1.46328e+08	1624934782	7.63612e+08	2503754101	9.12183e+08	2627357683	3641447889	4.47173e+08	2.99088e+08	824061216	1621438276	5.52035e+08	1437004906	6580967679	1.04474e+08	1050327787	1.98191e+08	257189	1604680695	1.2934e+08	8.10887e+07	1.55852e+08	29352.6	643677	5.43047e+08	3.95921e+07	1.11267e+06	6.11646e+08	1.64121e+08	2.2696e+06	21422.5	3.20166e+08	1330692105	3.95379e+08	2.95902e+08	6.86394e+07	5.90891e+08	2.20713e+08	1.77246e+08	5.0545e+07	2.79786e+07	1.3439e+08
2004	15346979635	4554489120	62600943891	4320657624	2.7535e+08	6.32548e+08	1185551033	1.38832e+08	1498364804	7.96627e+08	2493364242	8.46634e+08	2629335194	3679115061	4.67917e+08	3.12227e+08	816017998	1645807490	5.45701e+08	1322870660	7092248152	103422901	1033669220	1.92282e+08	247188	1627520009	1.20825e+08	8.19454e+07	1.53976e+08	27277.6	593153	5.27176e+08	4.04175e+07	1.68796e+06	6.33548e+08	1.46427e+08	7.91685e+06	22210.1	3.25405e+08	1198013672	4.39503e+08	3.09122e+08	7.6874e+07	5.92822e+08	205906770	1.76793e+08	5.06345e+07	2.56927e+07	1.33798e+08
2005	13834694077	4551289573	60880880997	4207647078	2.72905e+08	6.49741e+08	1134696219	1.36144e+08	1628634036	7.88743e+08	2424641344	8.46596e+08	2678095918	3551277661	5.19034e+08	3.12497e+08	7.81526e+08	1656720344	5.33394e+08	1260037823	7029782282	9.79948e+07	1011390875	2.00618e+08	241378	1791529062	1.09541e+08	8.26996e+07	1.46015e+08	26246.2	587280	5.14069e+08	4.20976e+07	1.28444e+06	6.07595e+08	1.64005e+08	3.2694e+06	22549.5	3.08792e+08	1283684912	4.76804e+08	3.06906e+08	7.55362e+07	5.97676e+08	1.98631e+08	1.63981e+08	4.50065e+07	2.07824e+07	1.3919e+08
2006	12781679479	4596299300	57281309038	4385402239	3.0196e+08	6.38743e+08	1073849491	1.29946e+08	1103034282	8.70285e+08	2405559706	8.1857e+08	3886421641	3412375015	4.72052e+08	336245674	9.87367e+08	1609461798	5.18878e+08	1155617653	5960053536	1.19839e+08	1033228061	240545062	206760	1775609726	1.01118e+08	8.24987e+07	1.55966e+08	25321.1	575617	5.46972e+08	4.30856e+07	1.6271e+06	5.75951e+08	1.65106e+08	5.32621e+06	20859.9	2.79309e+08	1199946964	1308356197	3.29796e+08	7.90178e+07	4.2982e+08	1.85379e+08	1.58827e+08	48861150	2.30736e+07	1.19815e+08
2007	11861941998	4429531126	53965170775	4428925747	2.90318e+08	6.59972e+08	1036201203	1.2614e+08	1491033903	8.57986e+08	2376436340	7.92846e+08	3854429725	2982137349	4.596e+08	3.4678e+08	9.43445e+08	1640433707	5.14501e+08	1128749911	5114323912	1.13687e+08	999711859	2.17387e+08	197708	1863247459	9.2824e+07	8.52153e+07	1.62455e+08	25548.2	576621	5.70042e+08	4.47801e+07	1.28154e+06	5.63903e+08	1.68031e+08	2.44421e+06	33052.7	2.51557e+08	1250774380	1490605628	3.31142e+08	7.84586e+07	4.39711e+08	1.56733e+08	164463252	59579000	2.62818e+07	1.07012e+08
2008	11528096361	4670340084	52434165490	3981853764	3.10721e+08	6.58529e+08	9.47127e+08	1.15118e+08	1569537208	8.74434e+08	2247751408	7.61066e+08	3973727658	2973306580	512057276	356744474	9.82556e+08	1670284434	5.56607e+08	9.50768e+08	4129992083	1.26462e+08	9.92549e+08	2.54406e+08	191545	1757867061	8.59688e+07	8.52704e+07	1.47482e+08	22041.8	540490	5.28382e+08	4.47154e+07	1.54146e+06	5.91896e+08	1.8353e+08	6.94409e+06	33593.6	2.61879e+08	1554468254	1275609035	3.36536e+08	7.64492e+07	4.57911e+08	155598494	1.53026e+08	5.69598e+07	3.11181e+07	1.12804e+08
2009	10838891628	4991437289	48981990978	4568828204	3.28953e+08	7.03728e+08	9.27257e+08	108462404	1365187826	959513119	2259898585	7.95138e+08	4121970422	2949225029	5.71673e+08	3.97345e+08	1044045908	1749303515	5.76462e+08	1099727620	3519842700	1.2381e+08	9.54365e+08	2.99061e+08	182623	1774065429	9.67385e+07	9.38821e+07	1.4964e+08	26114.6	542726	5.53629e+08	4.75816e+07	1.93294e+06	5.8718e+08	1.98468e+08	1.3097e+07	45885.2	3.08093e+08	1478656629	1256344031	3.50066e+08	8.73949e+07	5.00801e+08	1.62276e+08	1.48174e+08	5.58656e+07	3.48939e+07	1.30554e+08
2010	9951759691	4789265098	47309725658	4341370952	3.11727e+08	6.72169e+08	9.19492e+08	1.01492e+08	1670955417	8.69491e+08	2214213314	7.85987e+08	3919075769	2904397943	5.80909e+08	3.8645e+08	8.74909e+08	1745622282	5.72098e+08	1013471830	3049510472	1.23631e+08	9.68667e+08	3.07615e+08	180570	2057807704	9.88872e+07	8.73132e+07	1.43135e+08	30575.6	514264	5.13493e+08	4.48515e+07	1.56199e+06	5.87687e+08	1.5262e+08	8.21485e+06	48860.7	2.99078e+08	1552328853	1261503352	3.75736e+08	7.62916e+07	5.29432e+08	150496067	1.46864e+08	51726900	30328425	1.40923e+08
2011	9024290815	4687315051	42051200935	4210568517	2.58738e+08	703941187	8.33066e+08	1.00246e+08	1518040727	1015150655	2158945321	7.88549e+08	4714486964	2724661633	6.87675e+08	4.2758e+08	7.03008e+08	2026875804	559727728	9.8565e+08	2401686435	1.16708e+08	9.18873e+08	3.09228e+08	198340	2086623286	9.38601e+07	9.02514e+07	140232515	30923	475245	3.71865e+08	4.98762e+07	2.06685e+06	5.99292e+08	1.86268e+08	8.18625e+06	53684.7	2.69854e+08	1603035139	725377004	3.87059e+08	7.18045e+07	5.57249e+08	2885163507	2.36284e+08	55112382	2.69072e+07	104069600
2012	8753245250	4916989855	40388743239	4112807882	248509726	6.91166e+08	8.25179e+08	9.59763e+07	1510003976	9.87418e+08	2105029902	7.66451e+08	4652501353	2662509941	6.98438e+08	4.24152e+08	7.05791e+08	2018790666	6.16576e+08	1004972865	2172233727	1.20378e+08	8.88045e+08	3.81695e+08	197256	2082376991	8.45286e+07	9.36351e+07	1.40496e+08	30527	433130	3.55007e+08	4.91578e+07	4.77897e+06	6.42575e+08	1.9863e+08	1.02037e+07	54130.8	3.07144e+08	1708375876	8.42866e+08	4.01271e+08	7.50521e+07	6.15309e+08	5112514168	2.39327e+08	54290325	2.91394e+07	1.15466e+08
2013	8429482361	4869687656	40149769263	4339472883	2.42714e+08	6.80823e+08	7.95898e+08	9.44442e+07	1547409965	9.27664e+08	2103637884	7.65304e+08	4695881827	2777574649	8.18591e+08	4.45459e+08	7.07566e+08	2027100947	6.46415e+08	9.76987e+08	1975766814	1.18972e+08	8.8676e+08	3.78177e+08	197872	2154781338	8.5347e+07	9.33527e+07	1.4508e+08	28848.9	412338	3.62786e+08	4.9819e+07	2.11773e+06	6.73346e+08	2.07154e+08	5.22318e+06	69369	3.58431e+08	1767131970	8.72809e+08	3.92917e+08	7.14741e+07	6.93258e+08	49288077135	2.44277e+08	5.25794e+07	2.99472e+07	1.1778e+08
2014	8449277277	4889006391	38445007575	4347000683	2.48496e+08	7.17549e+08	7.94853e+08	1.01134e+08	1316657500	9.86897e+08	2105251150	7.54469e+08	4638907409	2647384687	8.36832e+08	4.82293e+08	7.43875e+08	2246730282	6.76724e+08	1053933908	1796705128	1.1221e+08	855904777	4.31703e+08	196592	2145240990	8.58376e+07	9.87923e+07	1.46505e+08	27944.1	410148	3.65599e+08	5.30272e+07	4.61942e+06	6.78253e+08	2.07132e+08	1.46787e+07	70649.8	3.37418e+08	1753244564	9.32618e+08	4.15791e+08	7.13739e+07	751592103	2418470064	2.39462e+08	5.38477e+07	4.85466e+07	1.13211e+08
2015	8493736926	5050826839	38699886366	4539666215	253246130	7.17751e+08	810547831	100543151	1327669451	9.51608e+08	2223033727	8.04986e+08	4743772885	2636086095	8.28359e+08	4.84593e+08	7.32091e+08	2227091253	6.43816e+08	1090517703	1714057904	1.14317e+08	8.37009e+08	397903607	166340	2155910828	8.98175e+07	9.76411e+07	1.51868e+08	28038.7	321492	383916954	5.1692e+07	3.65782e+06	6.73999e+08	2.03436e+08	2.50529e+06	75073.6	3.19838e+08	1748880000	9.95268e+08	4.17686e+08	6.85109e+07	454487891	24835537357	2.47205e+08	5.1389e+07	3.34623e+07	1.12889e+08
2016	8539523323	5221245013	38417106595	4405600481	2.52247e+08	7.18597e+08	8.07795e+08	1.01995e+08	1774203633	1071232205	2382925953	8.1358e+08	4944756783	2465351249	8.40439e+08	5.13987e+08	7.03862e+08	2229578971	659073702	1094986376	1698785773	1.16477e+08	8.57492e+08	470780052	164395	2126712279	8.31308e+07	9.80907e+07	1.58198e+08	29079.2	275941	4.01523e+08	5.37955e+07	4.00237e+06	6.88469e+08	1.94617e+08	4.80687e+06	74964.3	3.39263e+08	1737689899	9.75628e+08	4.27137e+08	6.47128e+07	445546709	3709391638	2.18806e+08	51713480	3.30265e+07	1.15577e+08
Average	12732355347	4755630110	51773326303	4356277978	277654394	6.65071e+08	1011117860	1.20665e+08	1502815549	9.04395e+08	2324583188	8.39376e+08	3772441856	3132620002	5.87817e+08	3.78298e+08	8.37379e+08	1808722902	5.87458e+08	1216755329	4380131906	1.15665e+08	9.78693e+08	286616292	216603	1877848192	1.03828e+08	8.99595e+07	1.49671e+08	28743	525763	4.81997e+08	4.54569e+07	2.20717e+06	603887372	1.75071e+08	6.20279e+06	41872.3	3.16346e+08	1450006187	8.4434e+08	3.49806e+08	7.37104e+07	554616141	5321184431	1.95008e+08	5.27672e+07	3.2101e+07	1.26782e+08
Soybeans (tofu) eco-potential GWP (RIW weighted)	China	United States	India	Russian Federation	Japan	Germany	Islamic Republic of Iran	Saudi Arabia	Indonesia	Canada	Mexico	South Africa	Brazil	Turkey	Australia	United Kingdom	Poland	France	Italy	Kazakhstan	Afghanistan	Albania	Algeria	Angola	Antigua and Barbuda	Argentina	Armenia	Austria	Azerbaijan	Bahrain	Barbados	Belarus	Belgium	Belize	Benin	Bolivia	Botswana	Brunei	Bulgaria	Burkina Faso	Burundi	Cameroon	Central African Republic	Chad	Chile	Colombia	Comoros	Congo	Croatia
2000	7066952123	1523674934	20436617721	1507475350	9.66073e+07	2.10304e+08	4.1976e+08	5.09207e+07	6.16492e+08	3.43833e+08	8.14607e+08	3.59617e+08	9.64671e+08	1146087216	1.47849e+08	1.01851e+08	3.00279e+08	4.71e+08	2.04486e+08	6.04715e+08	2121626298	4.25109e+07	3.72653e+08	6.0784e+07	99693.1	5.56373e+08	4.50674e+07	3.38513e+07	4.96991e+07	11086.1	232064	1.83578e+08	1.31068e+07	567318	140205606	4.77098e+07	1.68424e+06	7137.98	1.24226e+08	2.98571e+08	1.00061e+08	9.36051e+07	2.12074e+07	1.73274e+08	9.06452e+07	7.80796e+07	1.85543e+07	1.55026e+07	5.46847e+07
2001	6870618913	1552378318	21964289727	1552000194	9.50183e+07	200447063	4.39018e+08	5.12433e+07	5.20611e+08	2.81329e+08	8.43398e+08	3.2738e+08	8.5859e+08	1314892702	1.34037e+08	9.72139e+07	3.00577e+08	529484360	2.02475e+08	5.8784e+08	2464832796	3.91756e+07	3.80894e+08	7.08138e+07	95030.2	5.39698e+08	4.40655e+07	29619385	4.99153e+07	11210	230282	1.97168e+08	1.28687e+07	465052	187843942	4.91637e+07	1.20632e+06	7304.7	1.19072e+08	4.26762e+08	1.38313e+08	9.64408e+07	2.35989e+07	2.22514e+08	8.65303e+07	6.34112e+07	1.72061e+07	1.18868e+07	5.04137e+07
2002	6486689496	1574036620	22042483602	1506857330	9.19304e+07	2.04298e+08	4.27225e+08	4.93379e+07	3.96963e+08	2.59521e+08	8.46485e+08	3.18683e+08	8.60336e+08	1288249834	1.35494e+08	1.0281e+08	2.94254e+08	543865627	1.97964e+08	5.10626e+08	2155636175	3.62857e+07	3.63048e+08	6.60306e+07	90776.8	5.43744e+08	4.66372e+07	2.90741e+07	4.95522e+07	11301.2	216268	1.714e+08	1.34505e+07	383834	1.88866e+08	4.86777e+07	563157	7398.02	1.20586e+08	4.35728e+08	1.29995e+08	9.98324e+07	2.56892e+07	1.94868e+08	8.12409e+07	5.86454e+07	1.72168e+07	1.41235e+07	4.75066e+07
2003	5781220160	1559239954	21736824398	1389308243	9.11908e+07	2.05268e+08	4.13161e+08	4.87761e+07	5.41645e+08	2.54537e+08	8.34585e+08	3.04061e+08	8.75786e+08	1213815963	1.49058e+08	9.9696e+07	274687072	5.40479e+08	1.84012e+08	4.79002e+08	2193655893	3.48245e+07	3.50109e+08	6.60637e+07	85729.7	534893565	4.31133e+07	2.70296e+07	5.19506e+07	9784.21	214559	1.81016e+08	1.31974e+07	370890	2.03882e+08	5.47069e+07	756532	7140.84	1.06722e+08	4.43564e+08	131793111	9.86339e+07	2.28798e+07	196963676	7.3571e+07	5.90819e+07	1.68483e+07	9.32621e+06	4.47968e+07
2004	5115659878	1518163040	20866981297	1440219208	9.17834e+07	210849486	3.95184e+08	4.62773e+07	4.99455e+08	2.65542e+08	8.31121e+08	2.82211e+08	8.76445e+08	1226371687	155972203	1.04076e+08	2.72006e+08	5.48602e+08	181900221	4.40957e+08	2364082717	3.44743e+07	3.44556e+08	6.40939e+07	82395.9	5.42507e+08	4.02752e+07	2.73151e+07	5.13252e+07	9092.52	197718	1.75725e+08	1.34725e+07	562653	2.11183e+08	4.88092e+07	2.63895e+06	7403.36	1.08468e+08	3.99338e+08	1.46501e+08	1.03041e+08	2.56247e+07	1.97607e+08	68635590	5.89311e+07	1.68782e+07	8.56425e+06	4.45993e+07
2005	4611564692	1517096524	20293626999	1402549026	9.09684e+07	2.1658e+08	3.78232e+08	4.53814e+07	5.42878e+08	2.62914e+08	8.08214e+08	282198675	8.92699e+08	1183759220	1.73011e+08	1.04166e+08	2.60509e+08	5.5224e+08	1.77798e+08	4.20013e+08	2343260761	3.26649e+07	3.3713e+08	6.68727e+07	80459.3	5.97176e+08	3.65135e+07	2.75665e+07	4.86717e+07	8748.74	195760	1.71356e+08	1.40325e+07	428147	2.02532e+08	5.46685e+07	1.0898e+06	7516.5	1.02931e+08	4.27895e+08	1.58935e+08	102301866	2.51787e+07	1.99225e+08	6.62103e+07	5.46603e+07	1.50022e+07	6.92745e+06	4.63965e+07
2006	4260559826	1532099767	19093769679	1461800746	1.00653e+08	2.12914e+08	3.5795e+08	4.33154e+07	3.67678e+08	2.90095e+08	8.01853e+08	2.72857e+08	1295473880	1137458338	1.57351e+08	1.12082e+08	3.29122e+08	536487266	1.72959e+08	3.85206e+08	1986684512	3.99462e+07	3.44409e+08	8.01817e+07	68920	5.9187e+08	3.37061e+07	2.74996e+07	5.19887e+07	8440.37	191872	182324067	1.43619e+07	542368	1.91984e+08	5.50352e+07	1.7754e+06	6953.3	9.31029e+07	3.99982e+08	4.36119e+08	1.09932e+08	2.63393e+07	1.43273e+08	6.17928e+07	5.29424e+07	16287050	7.69119e+06	3.99383e+07
2007	3953980666	1476510375	17988390258	1476308582	9.67725e+07	2.19991e+08	3.454e+08	4.20465e+07	4.97011e+08	2.85995e+08	7.92145e+08	264282069	1284809908	994045783	1.532e+08	1.15593e+08	3.14482e+08	5.46811e+08	1.715e+08	3.7625e+08	1704774637	3.78956e+07	3.33237e+08	7.24623e+07	65902.7	6.21082e+08	3.09413e+07	2.84051e+07	5.41516e+07	8516.07	192207	1.90014e+08	1.49267e+07	427179	1.87968e+08	5.60105e+07	814736	11017.6	8.38522e+07	4.16925e+08	4.96869e+08	1.10381e+08	2.61529e+07	1.4657e+08	5.22442e+07	5.48211e+07	1.98597e+07	8.7606e+06	3.56708e+07
2008	3842698787	1556780028	17478055163	1327284588	103573650	2.1951e+08	3.15709e+08	3.83725e+07	5.23179e+08	2.91478e+08	7.4925e+08	2.53689e+08	1324575886	9.91102e+08	1.70686e+08	1.18915e+08	3.27519e+08	5.56761e+08	1.85536e+08	3.16923e+08	1376664028	4.21538e+07	3.3085e+08	8.48022e+07	63848.2	5.85956e+08	2.86563e+07	2.84235e+07	4.91607e+07	7347.26	180163	1.76127e+08	1.49051e+07	513818	1.97299e+08	6.11768e+07	2.3147e+06	11197.9	8.72931e+07	5.18156e+08	4.25203e+08	1.12179e+08	2.54831e+07	1.52637e+08	5.18662e+07	5.10088e+07	1.89866e+07	1.03727e+07	3.76012e+07
2009	3612963876	1663812430	16327330326	1522942735	1.09651e+08	2.34576e+08	3.09086e+08	3.61541e+07	4.55063e+08	3.19838e+08	7.533e+08	2.65046e+08	1373990141	9.83075e+08	1.90558e+08	1.32448e+08	3.48015e+08	5.83101e+08	1.92154e+08	3.66576e+08	1173280900	4.12699e+07	3.18122e+08	9.96869e+07	60874.4	5.91355e+08	3.22462e+07	3.1294e+07	4.98799e+07	8704.85	180909	1.84543e+08	1.58605e+07	644315	1.95727e+08	6.6156e+07	4.36567e+06	15295.1	1.02698e+08	4.92886e+08	4.18781e+08	1.16689e+08	2.91316e+07	1.66934e+08	5.4092e+07	4.93915e+07	1.86219e+07	1.16313e+07	4.35179e+07
2010	3317253230	1596421699	15769908553	1447123651	103909077	2.24056e+08	3.06497e+08	3.38307e+07	5.56985e+08	2.8983e+08	7.38071e+08	2.61996e+08	1306358590	9.68133e+08	1.93636e+08	1.28817e+08	291636285	5.81874e+08	1.90699e+08	3.37824e+08	1016503491	4.12102e+07	3.22889e+08	1.02538e+08	60190.1	6.85936e+08	3.29624e+07	2.91044e+07	4.77116e+07	10191.9	171421	1.71164e+08	1.49505e+07	520663	1.95896e+08	5.08734e+07	2.73828e+06	16286.9	9.96927e+07	5.17443e+08	4.20501e+08	1.25245e+08	2.54305e+07	1.76477e+08	5.01654e+07	4.89547e+07	17242300	10109475	4.69744e+07
2011	3008096938	1562438350	14017066978	1403522839	8.62458e+07	2.34647e+08	2.77689e+08	3.34154e+07	5.06014e+08	3.38384e+08	7.19648e+08	2.6285e+08	1571495655	9.08221e+08	2.29225e+08	1.42527e+08	2.34336e+08	6.75625e+08	1.86576e+08	3.2855e+08	8.00562e+08	3.89027e+07	3.06291e+08	1.03076e+08	66113.3	6.95541e+08	3.12867e+07	3.00838e+07	4.67442e+07	10307.7	158415	1.23955e+08	1.66254e+07	688951	199764147	6.20893e+07	2.72875e+06	17894.9	8.99513e+07	5.34345e+08	2.41792e+08	1.2902e+08	2.39348e+07	1.8575e+08	9.61721e+08	7.87614e+07	18370794	8.96907e+06	3.46899e+07
2012	2917748417	1638996618	13462914413	1370935961	8.28366e+07	2.30389e+08	2.7506e+08	3.19921e+07	5.03335e+08	329139265	7.01677e+08	2.55484e+08	1550833784	8.87503e+08	2.32813e+08	1.41384e+08	2.35264e+08	6.7293e+08	2.05525e+08	3.34991e+08	7.24078e+08	4.0126e+07	2.96015e+08	1.27232e+08	65752	6.94126e+08	2.81762e+07	3.12117e+07	4.6832e+07	10175.7	144377	1.18336e+08	1.63859e+07	1.59299e+06	2.14192e+08	6.62099e+07	3.40124e+06	18043.6	1.02381e+08	5.69459e+08	2.80955e+08	1.33757e+08	2.50174e+07	2.05103e+08	1704171389	7.97756e+07	18096775	9.71314e+06	3.84887e+07
2013	2809827454	1623229219	13383256421	1446490961	8.09047e+07	2.26941e+08	2.65299e+08	3.14814e+07	5.15803e+08	309221371	701212628	2.55101e+08	1565293942	9.25858e+08	2.72864e+08	1.48486e+08	2.35855e+08	6.757e+08	2.15472e+08	325662460	6.58589e+08	3.96573e+07	2.95587e+08	1.26059e+08	65957.5	7.1826e+08	2.8449e+07	3.11176e+07	4.836e+07	9616.3	137446	1.20929e+08	1.66063e+07	705910	2.24449e+08	6.90515e+07	1.74106e+06	23123	1.19477e+08	589043990	2.90936e+08	1.30972e+08	2.38247e+07	2.31086e+08	16429359045	8.14258e+07	1.75265e+07	9.9824e+06	3.92599e+07
2014	2816425759	1629668797	12815002525	1449000228	8.28319e+07	2.39183e+08	2.64951e+08	3.37112e+07	4.38886e+08	3.28966e+08	7.0175e+08	2.5149e+08	1546302470	8.82462e+08	2.78944e+08	1.60764e+08	2.47958e+08	748910094	2.25575e+08	3.51311e+08	5.98902e+08	3.74034e+07	2.85302e+08	1.43901e+08	65530.6	715080330	2.86125e+07	3.29308e+07	4.88351e+07	9314.68	136716	1.21866e+08	1.76757e+07	1.53981e+06	2.26084e+08	6.90439e+07	4.89291e+06	23549.9	1.12473e+08	5.84415e+08	3.10873e+08	1.38597e+08	2.37913e+07	250530701	8.06157e+08	7.98205e+07	1.79492e+07	1.61822e+07	3.7737e+07
2015	2831245642	1683608946	12899962122	1513222072	8.44154e+07	2.3925e+08	2.70183e+08	3.35144e+07	4.42556e+08	3.17203e+08	7.41011e+08	2.68329e+08	1581257628	8.78695e+08	2.7612e+08	1.61531e+08	2.4403e+08	7.42364e+08	2.14605e+08	3.63506e+08	5.71353e+08	3.81058e+07	2.79003e+08	1.32635e+08	55446.5	7.18637e+08	2.99392e+07	3.2547e+07	5.06228e+07	9346.23	107164	127972318	1.72307e+07	1.21927e+06	2.24666e+08	6.7812e+07	835097	25024.5	1.06613e+08	582960000	3.31756e+08	1.39229e+08	2.2837e+07	1.51496e+08	8278512452	8.24015e+07	1.71297e+07	1.11541e+07	3.76295e+07
2016	2846507774	1740415004	12805702198	1468533494	8.40822e+07	2.39532e+08	2.69265e+08	3.39983e+07	5.91401e+08	3.57077e+08	794308651	2.71193e+08	1648252261	8.21784e+08	2.80146e+08	1.71329e+08	2.34621e+08	7.43193e+08	219691234	3.64995e+08	5.66262e+08	3.88258e+07	285830554	156926684	54798.3	7.08904e+08	2.77103e+07	3.26969e+07	5.27328e+07	9693.08	91980.3	1.33841e+08	1.79318e+07	1.33412e+06	2.2949e+08	6.48724e+07	1.60229e+06	24988.1	1.13088e+08	5.7923e+08	3.25209e+08	1.42379e+08	2.15709e+07	1.48516e+08	1236463879	7.29354e+07	1.72378e+07	1.10088e+07	3.85257e+07
Average	4244118449	1585210037	17257775434	1452092659	9.25515e+07	221690360	3.37039e+08	4.02217e+07	5.00939e+08	3.01465e+08	7.74861e+08	2.79792e+08	1257480619	1044206667	1.95939e+08	1.26099e+08	2.79126e+08	6.02908e+08	1.95819e+08	4.05585e+08	1460043969	3.85549e+07	3.26231e+08	9.55388e+07	72201.1	6.25949e+08	3.46093e+07	2.99865e+07	4.98902e+07	9580.99	175254	1.60666e+08	1.51523e+07	735723	2.01296e+08	5.83568e+07	2.0676e+06	13957.4	1.05449e+08	4.83335e+08	2.81447e+08	1.16602e+08	2.45701e+07	184872047	1773728144	6.50028e+07	1.75891e+07	1.07003e+07	4.22606e+07
Crickets eco-potential GWP (RIW weighted)	China	United States	India	Russian Federation	Japan	Germany	Islamic Republic of Iran	Saudi Arabia	Indonesia	Canada	Mexico	South Africa	Brazil	Turkey	Australia	United Kingdom	Poland	France	Italy	Kazakhstan	Afghanistan	Albania	Algeria	Angola	Antigua and Barbuda	Argentina	Armenia	Austria	Azerbaijan	Bahrain	Barbados	Belarus	Belgium	Belize	Benin	Bolivia	Botswana	Brunei	Bulgaria	Burkina Faso	Burundi	Cameroon	Central African Republic	Chad	Chile	Colombia	Comoros	Congo	Croatia
2000	8.30367e+08	1.79032e+08	2401302582	1.77128e+08	1.13514e+07	2.47107e+07	4.93218e+07	5.98318e+06	7.24378e+07	4.04004e+07	9.57164e+07	4.2255e+07	1.13349e+08	1.34665e+08	1.73722e+07	1.19674e+07	3.52828e+07	5.53425e+07	2.40271e+07	7.1054e+07	249291090	4.99503e+06	4.37867e+07	7.14212e+06	11713.9	6.53738e+07	5.29542e+06	3.97753e+06	5.83964e+06	1302.62	27267.5	2.15704e+07	1.54004e+06	66659.8	1.64742e+07	5.6059e+06	197898	838.712	1.45966e+07	3.5082e+07	1.17571e+07	1.09986e+07	2.49187e+06	2.03597e+07	1.06508e+07	9.17435e+06	2.18013e+06	1.82155e+06	6.42546e+06
2001	8.07298e+08	1.82404e+08	2580804043	1.8236e+08	1.11647e+07	2.35525e+07	5.15846e+07	6.02109e+06	6.11718e+07	3.30562e+07	9.90993e+07	3.84672e+07	1.00884e+08	1.545e+08	1.57494e+07	1.14226e+07	3.53178e+07	6.22144e+07	2.37908e+07	6.90712e+07	2.89618e+08	4.60314e+06	4.47551e+07	8.32063e+06	11166	6.34145e+07	5.17769e+06	3.48028e+06	5.86505e+06	1317.18	27058.1	2.31672e+07	1.51207e+06	54643.6	2.20717e+07	5.77673e+06	141743	858.303	1.3991e+07	5.01445e+07	1.62518e+07	1.13318e+07	2.77287e+06	2.61454e+07	1.01673e+07	7.45082e+06	2.02171e+06	1.3967e+06	5.92361e+06
2002	7.62186e+08	1.84949e+08	2589991823	1.77056e+08	1.08018e+07	2.4005e+07	5.01989e+07	5.79721e+06	4.66431e+07	3.04937e+07	9.94619e+07	3.74453e+07	1.01089e+08	1.51369e+08	1.59206e+07	1.20801e+07	3.45748e+07	6.39042e+07	2.32608e+07	5.99986e+07	2.53287e+08	4.26357e+06	4.26582e+07	7.7586e+06	10666.3	6.389e+07	5.47987e+06	3.4162e+06	5.82239e+06	1327.9	25411.5	2.01395e+07	1.58043e+06	45100.5	2.21917e+07	5.71963e+06	66171	869.267	1.41688e+07	5.11981e+07	1.52744e+07	1.17303e+07	3.01848e+06	2.2897e+07	9.5458e+06	6.89083e+06	2.02297e+06	1.65952e+06	5.58203e+06
2003	6.79293e+08	1.83211e+08	2554076867	1.63244e+08	1.07149e+07	2.4119e+07	4.85464e+07	5.73119e+06	6.36433e+07	2.99081e+07	9.80637e+07	3.57272e+07	1.02905e+08	1.42623e+08	1.75143e+07	1.17143e+07	3.22757e+07	6.35063e+07	2.16214e+07	5.62827e+07	2.57755e+08	4.09188e+06	4.11378e+07	7.76249e+06	10073.2	6.285e+07	5.06581e+06	3.17597e+06	6.10419e+06	1149.64	25210.7	2.12693e+07	1.55069e+06	43579.6	2.39561e+07	6.42806e+06	88892.5	839.049	1.25398e+07	5.21188e+07	1.54857e+07	1.15895e+07	2.68838e+06	2.31432e+07	8.6446e+06	6.94212e+06	1.97968e+06	1.09583e+06	5.26363e+06
2004	6.0109e+08	1.78384e+08	2451870302	1.69226e+08	1.07845e+07	2.47748e+07	4.64341e+07	5.43758e+06	5.8686e+07	3.12012e+07	9.76568e+07	3.31598e+07	1.02982e+08	1.44099e+08	1.83267e+07	1.22289e+07	3.19607e+07	6.44608e+07	2.13733e+07	5.18124e+07	2.7778e+08	4.05073e+06	4.04854e+07	7.53103e+06	9681.52	6.37445e+07	4.73233e+06	3.20953e+06	6.03071e+06	1068.37	23231.8	2.06477e+07	1.58302e+06	66111.8	2.4814e+07	5.73508e+06	310077	869.894	1.2745e+07	4.69222e+07	1.72139e+07	1.21073e+07	3.0109e+06	2.32189e+07	8.06468e+06	6.9244e+06	1.98319e+06	1.0063e+06	5.24042e+06
2005	5.41859e+08	1.78259e+08	2384501172	1.648e+08	1.06888e+07	2.54482e+07	4.44423e+07	5.33232e+06	6.37882e+07	3.08924e+07	9.49651e+07	3.31583e+07	1.04892e+08	1.39092e+08	2.03288e+07	1.22395e+07	3.06098e+07	6.48882e+07	2.08913e+07	4.93515e+07	2.75333e+08	3.83813e+06	3.96128e+07	7.85754e+06	9453.96	7.01682e+07	4.29034e+06	3.23907e+06	5.71892e+06	1027.98	23001.8	2.01344e+07	1.64882e+06	50307.2	2.37975e+07	6.42354e+06	128051	883.189	1.20943e+07	5.02777e+07	1.86748e+07	1.20205e+07	2.9585e+06	2.3409e+07	7.77972e+06	6.42259e+06	1.76276e+06	813976	5.45159e+06
2006	5.00616e+08	1.80022e+08	2243517937	1.71762e+08	1.18268e+07	2.50174e+07	4.20591e+07	5.08956e+06	4.32022e+07	3.40862e+07	9.42178e+07	3.20607e+07	1.52218e+08	1.33651e+08	1.84887e+07	1.31696e+07	3.86719e+07	6.30373e+07	2.03227e+07	4.52617e+07	2.33435e+08	4.69368e+06	4.04681e+07	9.42135e+06	8098.1	6.95447e+07	3.96047e+06	3.2312e+06	6.10867e+06	991.743	22545	2.14231e+07	1.68752e+06	63728.2	2.25581e+07	6.46664e+06	208610	817.012	1.09396e+07	4.69979e+07	5.1244e+07	1.2917e+07	3.09486e+06	1.68346e+07	7.26066e+06	6.22073e+06	1.91373e+06	903715	4.69275e+06
2007	4.64593e+08	1.7349e+08	2113635855	1.73466e+08	1.13708e+07	2.58489e+07	4.05845e+07	4.94047e+06	5.83988e+07	3.36045e+07	9.30771e+07	3.10531e+07	1.50965e+08	1.168e+08	1.8001e+07	1.35822e+07	3.69516e+07	6.42503e+07	2.01513e+07	4.42094e+07	2.00311e+08	4.45273e+06	3.91554e+07	8.51432e+06	7743.57	7.29772e+07	3.63561e+06	3.3376e+06	6.36281e+06	1000.64	22584.3	22326650	1.75389e+06	50193.5	2.20862e+07	6.58123e+06	95731.4	1294.57	9.85263e+06	4.89887e+07	5.83821e+07	1.29697e+07	3.07296e+06	1.7222e+07	6.13869e+06	6.44148e+06	2.33351e+06	1.02937e+06	4.19131e+06
2008	4.51517e+08	1.82922e+08	2053671482	1.55956e+08	1.21699e+07	2.57924e+07	3.70958e+07	4.50877e+06	6.14735e+07	3.42487e+07	8.80369e+07	2.98084e+07	1.55638e+08	1.16455e+08	2.00556e+07	1.39725e+07	3.84835e+07	6.54195e+07	2.18004e+07	3.72384e+07	1.61758e+08	4.95308e+06	3.88748e+07	9.96425e+06	7502.17	6.88498e+07	3.36711e+06	3.33976e+06	5.77638e+06	863.303	21169.2	2.06949e+07	1.75135e+06	60373.7	2.31826e+07	7.18827e+06	271977	1315.75	1.02569e+07	6.08833e+07	4.99614e+07	1.3181e+07	2.99426e+06	1.79348e+07	6.09427e+06	5.99353e+06	2.23093e+06	1.21879e+06	4.41815e+06
2009	4.24523e+08	1.95498e+08	1918461313	1.78946e+08	1.2884e+07	2.75627e+07	3.63176e+07	4.24811e+06	5.34699e+07	3.75809e+07	8.85127e+07	3.11429e+07	1.61444e+08	1.15511e+08	22390544	1.55627e+07	4.08918e+07	6.85144e+07	2.25781e+07	4.30727e+07	1.37861e+08	4.84921e+06	3.73793e+07	1.17132e+07	7152.74	6.94842e+07	3.78893e+06	3.67705e+06	5.86089e+06	1022.82	21256.8	2.16838e+07	1.86361e+06	75707	2.29979e+07	7.77333e+06	512966	1797.17	1.2067e+07	5.79141e+07	4.92068e+07	1.37109e+07	3.42297e+06	1.96147e+07	6.3558e+06	5.8035e+06	2188069	1.36668e+06	5.11335e+06
2010	3.89777e+08	1.8758e+08	1852964255	1.70037e+08	1.22093e+07	2.63266e+07	3.60134e+07	3.9751e+06	6.54458e+07	34055050	8.67234e+07	3.07845e+07	1.53497e+08	1.13756e+08	2.27523e+07	1.5136e+07	3.42673e+07	6.83702e+07	2.24072e+07	3.96943e+07	1.19439e+08	4.8422e+06	3.79395e+07	1.20483e+07	7072.34	8.05975e+07	3.87308e+06	3.41977e+06	5.60611e+06	1197.54	20142	2.01118e+07	1.75668e+06	61177.9	2.30177e+07	5.97762e+06	321748	1913.71	1.17139e+07	6.07995e+07	4.94089e+07	1.47163e+07	2.98809e+06	2.07361e+07	5.89443e+06	5.75218e+06	2.02597e+06	1.18786e+06	5.51949e+06
2011	3.53451e+08	1.83587e+08	1647005370	1.64914e+08	1.01339e+07	2.7571e+07	3.26284e+07	3.92631e+06	5.94566e+07	3.97601e+07	8.45587e+07	3.08848e+07	1.84651e+08	106715914	2.69339e+07	1.67469e+07	2.75345e+07	79385969	2.19227e+07	3.86046e+07	9.40661e+07	4.57107e+06	3.59892e+07	1.21114e+07	7768.32	8.17261e+07	3.67619e+06	3.53485e+06	5.49244e+06	1211.15	18613.8	1.45647e+07	1.95349e+06	80951.7	2.34723e+07	7.29549e+06	320628	2102.65	1.05693e+07	6.27855e+07	2.84106e+07	1.51598e+07	2.81234e+06	2.18256e+07	1.13002e+08	9.25447e+06	2.15857e+06	1.05387e+06	4.07606e+06
2012	342835439	1.92582e+08	1581892444	1.61085e+08	9.7333e+06	2.70707e+07	3.23195e+07	3.75907e+06	5.91418e+07	3.86739e+07	8.2447e+07	3.00193e+07	1.82223e+08	1.04282e+08	2.73555e+07	1.66126e+07	2.76435e+07	7.90693e+07	2.41492e+07	3.93614e+07	8.50792e+07	4.7148e+06	3.47818e+07	1.49497e+07	7725.86	8.15598e+07	3.31071e+06	3.66737e+06	5.50276e+06	1195.64	16964.2	1.39044e+07	1.92535e+06	187176	2.51675e+07	7.77966e+06	399646	2120.12	1.20298e+07	6.69114e+07	3.30123e+07	1.57165e+07	2.93954e+06	2.40996e+07	2.0024e+08	9.37363e+06	2.12637e+06	1.14129e+06	4.52242e+06
2013	3.30155e+08	1.90729e+08	1572532629	1.69963e+08	9.50631e+06	2.66656e+07	3.11727e+07	3.69906e+06	6.06069e+07	3.63335e+07	8.23925e+07	2.99744e+07	1.83922e+08	1.08788e+08	3.20615e+07	1.74471e+07	2.7713e+07	7.93948e+07	2.53179e+07	3.82653e+07	7.73842e+07	4.65973e+06	3.47314e+07	1.4812e+07	7750	8.43956e+07	3.34276e+06	3.65632e+06	5.6823e+06	1129.92	16149.9	1.42091e+07	1.95124e+06	82944.4	2.63727e+07	8.11355e+06	204575	2716.95	1.40385e+07	6.92127e+07	3.4185e+07	1.53893e+07	2.7994e+06	2.71526e+07	1930449688	9.56753e+06	2.05936e+06	1.17293e+06	4.61303e+06
2014	3.3093e+08	1.91486e+08	1505762797	1.70258e+08	9.73274e+06	2.8104e+07	3.11317e+07	3.96106e+06	5.15691e+07	3.86535e+07	8.24557e+07	2.955e+07	1.81691e+08	1.03689e+08	32775935	1.88898e+07	2.91351e+07	8.79969e+07	2.6505e+07	4.12791e+07	7.0371e+07	4.3949e+06	3.35229e+07	1.69084e+07	7699.85	8.40219e+07	3.36197e+06	3.86936e+06	5.73813e+06	1094.48	16064.1	1.43193e+07	2.0769e+06	180927	2.65649e+07	8.11266e+06	574917	2767.12	1.32155e+07	6.86687e+07	3.65275e+07	1.62852e+07	2.79548e+06	2.94374e+07	9.47234e+07	9.37891e+06	2.10903e+06	1.90141e+06	4.4341e+06
2015	3.32671e+08	1.97824e+08	1515745549	1.77804e+08	9.91881e+06	2.81119e+07	3.17465e+07	3.93794e+06	5.20004e+07	3.72713e+07	8.70688e+07	3.15286e+07	1.85798e+08	1.03247e+08	3.2444e+07	1.89799e+07	2.86736e+07	8.72277e+07	2.52161e+07	4.27119e+07	6.71339e+07	4.47743e+06	3.27828e+07	1.55846e+07	6514.97	8.44398e+07	3.51785e+06	3.82428e+06	5.94818e+06	1098.18	12591.8	1.50367e+07	2.0246e+06	143265	2.63983e+07	7.96791e+06	98123.9	2940.38	1.2527e+07	68497800	3.89813e+07	1.63594e+07	2.68334e+06	1.78008e+07	9.72725e+08	9.68218e+06	2.01274e+06	1.31061e+06	4.42147e+06
2016	3.34465e+08	204498763	1504670008	1.72553e+08	9.87966e+06	2.81451e+07	3.16386e+07	3.9948e+06	6.94896e+07	4.19566e+07	9.33313e+07	3.18652e+07	1.9367e+08	9.65596e+07	3.29172e+07	2.01312e+07	2.75679e+07	8.73252e+07	2.58137e+07	4.2887e+07	6.65358e+07	4.56203e+06	3.35851e+07	1.84389e+07	6438.8	8.32962e+07	3.25596e+06	3.84189e+06	6.19611e+06	1138.94	10807.7	1.57263e+07	2.10699e+06	156760	2.6965e+07	7.6225e+06	188269	2936.1	1.32878e+07	6.80595e+07	3.82121e+07	1.67295e+07	2.53459e+06	1.74506e+07	1.45285e+08	8.5699e+06	2.02544e+06	1.29354e+06	4.52677e+06
Average	4.98684e+08	1.86262e+08	2027788614	1.70621e+08	1.08748e+07	2.60486e+07	3.96021e+07	4.72605e+06	5.88603e+07	3.54221e+07	9.10462e+07	3.28756e+07	1.47754e+08	1.22694e+08	2.30228e+07	1.48167e+07	3.27974e+07	7.08416e+07	2.30088e+07	4.76563e+07	1.71555e+08	4.5302e+06	3.83321e+07	1.12258e+07	8483.63	7.35491e+07	4.06659e+06	3.52341e+06	5.8621e+06	1125.77	20592.4	1.88782e+07	1.78039e+06	86447.5	2.36523e+07	6.85693e+06	242943	1640	1.23902e+07	56791909	3.307e+07	1.37007e+07	2.88699e+06	2.17225e+07	2.08413e+08	7.63783e+06	2.06672e+06	1.25729e+06	4.96563e+06
Mealworms eco-potential GWP (RIW weighted)	China	United States	India	Russian Federation	Japan	Germany	Islamic Republic of Iran	Saudi Arabia	Indonesia	Canada	Mexico	South Africa	Brazil	Turkey	Australia	United Kingdom	Poland	France	Italy	Kazakhstan	Afghanistan	Albania	Algeria	Angola	Antigua and Barbuda	Argentina	Armenia	Austria	Azerbaijan	Bahrain	Barbados	Belarus	Belgium	Belize	Benin	Bolivia	Botswana	Brunei	Bulgaria	Burkina Faso	Burundi	Cameroon	Central African Republic	Chad	Chile	Colombia	Comoros	Congo	Croatia
2000	4324974700	9.32489e+08	12507210045	9.22575e+08	5.91237e+07	1.28706e+08	2.56893e+08	31163454	3.77293e+08	2.10426e+08	4.9854e+08	2.20085e+08	5.90379e+08	7.01405e+08	9.04834e+07	6.23325e+07	1.83771e+08	2.88252e+08	125145494	3.70085e+08	1298435294	2.60167e+07	2.28063e+08	3.71998e+07	61012.2	340500319	2.75813e+07	2.0717e+07	3.04158e+07	6784.69	142023	1.1235e+08	8.02134e+06	347198	8.58058e+07	2.91984e+07	1.03075e+06	4368.44	7.60264e+07	1.82725e+08	6.12372e+07	5.72863e+07	1.2979e+07	1.06044e+08	5.54749e+07	4.77847e+07	1.13552e+07	9.48759e+06	3.34671e+07
2001	4204818775	9.50056e+08	13442145313	9.49824e+08	5.81512e+07	1.22674e+08	2.68679e+08	3.13609e+07	3.18614e+08	1.72174e+08	5.1616e+08	2.00357e+08	5.25457e+08	8.04714e+08	8.20309e+07	5.94949e+07	1.83953e+08	3.24044e+08	123914552	3.59758e+08	1508477671	2.39755e+07	2.33107e+08	4.33381e+07	58158.5	330295169	2.69681e+07	1.81271e+07	3.05482e+07	6860.55	140932	1.20667e+08	7.87563e+06	284612	1.1496e+08	3.00882e+07	738270	4470.48	7.28723e+07	2.61178e+08	8.46477e+07	5.90218e+07	1.44425e+07	1.36179e+08	5.29565e+07	3.88077e+07	1.05301e+07	7.27474e+06	3.08532e+07
2002	3969853971	9.6331e+08	13489999965	9.22197e+08	5.62614e+07	1.2503e+08	2.61462e+08	3.01948e+07	2.42941e+08	1.58827e+08	5.18049e+08	1.95034e+08	5.26525e+08	7.88409e+08	8.29226e+07	6.29195e+07	1.80083e+08	3.32846e+08	1.21154e+08	3.12503e+08	1319249339	2.22068e+07	2.22185e+08	4.04107e+07	55555.4	3.32772e+08	2.85419e+07	1.77933e+07	3.0326e+07	6916.36	132356	1.04897e+08	8.2317e+06	234906	1.15586e+08	2.97908e+07	344652	4527.59	7.37983e+07	2.66666e+08	7.95571e+07	6.10974e+07	1.57218e+07	1.19259e+08	4.97194e+07	3.5891e+07	1.05367e+07	8.64361e+06	2.90741e+07
2003	3538106738	9.54255e+08	13302936532	8.50257e+08	5.58088e+07	1.25624e+08	2.52854e+08	2.9851e+07	3.31487e+08	155776842	5.10766e+08	1.86085e+08	5.35981e+08	7.42855e+08	9.12232e+07	6.10139e+07	1.68108e+08	3.30773e+08	1.12615e+08	2.93149e+08	1342517406	2.13126e+07	2.14267e+08	4.0431e+07	52466.6	3.27355e+08	2.63853e+07	1.65421e+07	3.17937e+07	5987.94	131310	1.10782e+08	8.07679e+06	226985	1.24776e+08	3.34806e+07	462998	4370.19	6.53139e+07	2.71461e+08	8.06574e+07	6.0364e+07	1.40024e+07	1.20542e+08	4.50255e+07	3.61581e+07	1.03112e+07	5.70764e+06	2.74157e+07
2004	3130783846	9.29116e+08	12770592554	8.81414e+08	5.61714e+07	1.2904e+08	2.41852e+08	2.83217e+07	3.05666e+08	162511899	5.08646e+08	1.72713e+08	5.36384e+08	7.50539e+08	9.5455e+07	6.36943e+07	1.66468e+08	3.35745e+08	1.11323e+08	2.69866e+08	1446818623	2.10983e+07	2.10869e+08	3.92255e+07	50426.3	3.32014e+08	2.46484e+07	1.67169e+07	3.1411e+07	5564.62	121003	107543959	8.24517e+06	344344	1.29244e+08	2.98712e+07	1.61504e+06	4530.85	6.63825e+07	2.44395e+08	8.96585e+07	6.30609e+07	1.56823e+07	1.20936e+08	4.2005e+07	3.60658e+07	1.03294e+07	5.24132e+06	2.72948e+07
2005	2822277592	9.28463e+08	12419699723	8.5836e+08	5.56726e+07	1.32547e+08	2.31478e+08	2.77734e+07	3.32241e+08	1.60903e+08	4.94627e+08	1.72706e+08	5.46332e+08	7.24461e+08	1.05883e+08	6.37494e+07	1.59431e+08	3.37971e+08	1.08812e+08	2.57048e+08	1434075585	1.99909e+07	2.06324e+08	4.09261e+07	49241.1	3.65472e+08	2.23463e+07	1.68707e+07	2.97871e+07	5354.23	119805	1.0487e+08	8.5879e+06	262026	123949455	3.34571e+07	666958	4600.1	6.29935e+07	2.61872e+08	9.7268e+07	6.26087e+07	1.54094e+07	1.21926e+08	4.05207e+07	3.34521e+07	9.18133e+06	4.2396e+06	2.83947e+07
2006	2607462614	9.37645e+08	11685387044	8.94622e+08	6.15999e+07	1.30304e+08	2.19065e+08	2.6509e+07	2.25019e+08	1.77538e+08	4.90734e+08	1.66988e+08	7.9283e+08	696124503	9.62986e+07	6.85941e+07	201422932	3.2833e+08	1.05851e+08	2.35746e+08	1215850921	2.44471e+07	2.10779e+08	4.90712e+07	42179	3.62224e+08	2.06281e+07	1.68297e+07	3.18171e+07	5165.5	117426	111582329	8.78946e+06	331929	1.17494e+08	3.36815e+07	1.08655e+06	4255.42	5.69789e+07	2.44789e+08	2.66905e+08	6.72784e+07	1.61196e+07	8.76833e+07	3.78172e+07	3.24008e+07	9.96767e+06	4.70701e+06	2.44422e+07
2007	2419836168	9.03624e+08	11008894838	9.03501e+08	5.92248e+07	1.34634e+08	2.11385e+08	2.57325e+07	3.04171e+08	1.75029e+08	4.84793e+08	1.61741e+08	7.86304e+08	6.08356e+08	9.37585e+07	7.07432e+07	1.92463e+08	3.34648e+08	1.04958e+08	2.30265e+08	1043322078	2.31921e+07	2.03941e+08	4.43469e+07	40332.5	3.80102e+08	1.89361e+07	1.73839e+07	3.31408e+07	5211.83	117631	116288594	9.13513e+06	261433	115036312	3.42784e+07	498618	6742.76	5.13175e+07	2.55158e+08	3.04084e+08	6.7553e+07	1.60056e+07	8.97011e+07	3.19734e+07	3.35505e+07	12154116	5.36149e+06	2.18305e+07
2008	2351731658	9.52749e+08	10696569760	812298168	6.33871e+07	134339941	1.93214e+08	2.3484e+07	3.20186e+08	1.78385e+08	4.58541e+08	1.55257e+08	8.1064e+08	6.06555e+08	1.0446e+08	7.27759e+07	2.00441e+08	3.40738e+08	1.13548e+08	193956639	8.42518e+08	2.57982e+07	202480041	5.18989e+07	39075.1	3.58605e+08	1.75376e+07	1.73952e+07	3.00863e+07	4496.52	110260	1.0779e+08	9.12194e+06	314457	1.20747e+08	3.74402e+07	1.41659e+06	6853.09	5.34234e+07	3.17112e+08	2.60224e+08	6.86533e+07	1.55956e+07	9.34138e+07	3.17421e+07	3.12174e+07	1.16198e+07	6.3481e+06	2.3012e+07
2009	2211133892	1018253207	9992326159	9.32041e+08	6.71064e+07	1.43561e+08	1.8916e+08	2.21263e+07	2.78498e+08	1.95741e+08	4.61019e+08	1.62208e+08	8.40882e+08	6.01642e+08	1.16621e+08	8.10583e+07	2.12985e+08	3.56858e+08	1.17598e+08	2.24344e+08	7.18048e+08	2.52572e+07	1.9469e+08	6.10084e+07	37255.1	3.61909e+08	1.97347e+07	1.9152e+07	3.05265e+07	5327.37	110716	1.1294e+08	9.70665e+06	394321	1.19785e+08	4.04875e+07	2.67179e+06	9360.58	6.2851e+07	3.01646e+08	2.56294e+08	7.14135e+07	1.78286e+07	1.02163e+08	3.31043e+07	3.02276e+07	1.13966e+07	7.11835e+06	2.6633e+07
2010	2030158977	9.7701e+08	9651184034	8.8564e+08	6.35924e+07	1.37122e+08	1.87576e+08	2.07044e+07	3.40875e+08	1.77376e+08	451699516	1.60341e+08	7.99491e+08	5.92497e+08	1.18505e+08	7.88359e+07	1.78481e+08	3.56107e+08	116708066	2.06748e+08	6.221e+08	2.52206e+07	1.97608e+08	6.27535e+07	36836.3	4.19793e+08	2.0173e+07	1.78119e+07	2.91995e+07	6237.42	104910	1.04753e+08	9.14971e+06	318646	1.19888e+08	3.11345e+07	1.67583e+06	9967.58	6.1012e+07	3.16675e+08	2.57347e+08	7.66501e+07	1.55635e+07	1.08004e+08	3.07012e+07	2.99603e+07	1.05523e+07	6.187e+06	2.87483e+07
2011	1840955326	9.56212e+08	8578444991	8.58956e+08	5.27825e+07	1.43604e+08	1.69945e+08	2.04502e+07	3.0968e+08	2.07091e+08	4.40425e+08	1.60864e+08	9.61755e+08	5.55831e+08	1.40286e+08	8.72263e+07	1.43414e+08	4.13483e+08	1.14184e+08	2.01073e+08	4.89944e+08	2.38085e+07	1.8745e+08	6.30825e+07	40461.4	4.25671e+08	1.91475e+07	1.84113e+07	2.86074e+07	6308.29	96950.1	75860435	1.01748e+07	421638	1.22256e+08	3.79986e+07	1.67e+06	10951.7	5.50502e+07	3.27019e+08	1.47977e+08	7.896e+07	1.46481e+07	1.13679e+08	5.88573e+08	4.8202e+07	1.12429e+07	5.48907e+06	2.12302e+07
2012	1785662031	1003065930	8239303621	8.39013e+08	5.0696e+07	1.40998e+08	168336446	1.95792e+07	308040811	2.01433e+08	4.29426e+08	1.56356e+08	949110276	5.43152e+08	1.42481e+08	8.65271e+07	1.43981e+08	4.11833e+08	125781561	2.05014e+08	4.43136e+08	2.45571e+07	1.81161e+08	7.78657e+07	40240.2	4.24805e+08	1.72438e+07	1.91016e+07	2.86612e+07	6227.52	88358.5	7.24214e+07	1.00282e+07	974910	1.31085e+08	4.05205e+07	2.08156e+06	11042.7	6.26573e+07	3.48509e+08	1.71945e+08	8.18593e+07	1.53106e+07	125523000	1042952890	4.88227e+07	1.10752e+07	5.94444e+06	2.35551e+07
[truncated: 100 more rows]
[truncated: 99 more columns]

## Sheet: 5. Weighted RIW WU
RIW (water use/land/capita)	China	United States	India	Russian Federation	Japan	Germany	Islamic Republic of Iran	Saudi Arabia	Indonesia	Canada	Mexico	South Africa	Brazil	Turkey	Australia	United Kingdom	Poland	France	Italy	Kazakhstan	Afghanistan	Albania	Algeria	Angola	Antigua and Barbuda	Argentina	Armenia	Austria	Azerbaijan	Bahrain	Barbados	Belarus	Belgium	Belize	Benin	Bolivia	Botswana	Brunei	Bulgaria	Burkina Faso	Burundi	Cameroon	Central African Republic	Chad	Chile	Colombia	Comoros	Congo	Croatia
[truncated: 321 more rows]
[truncated: 99 more columns]

[truncated: 19 more sheets: 6. Weighted RIW ALU, 7. Weghted RIW EU, 8. Beef integr EP, 9. Cheese integr EP, 10. Peas integr EP, 11. Pig meat integr EP, 12. Egg integr EP, 13. Poultry Meat integr EP, 14. Ground Nuts integr EP, 15. Fish integr EP, 16. Soybeans (tofu) integr EP, 17. Cricket integr EP, 18. Mealworm integr EP, 19. Cultured Meat integr EP, 20. BSF integr EP, 21. House Fly integr EP, 22. Chlorella integr EP, 23. Spirulina integr EP , 24. Comparision graphs (EP & ab]
