# Supplementary material for: Development of a regionalized dynamic weighting method for the environmental impact of alternative protein sources
Source: Frontiers journal article supplement (doi:10.3389/fsufs.2024.1294390), 2024-01-29
Supplement: Table_2.XLSX [file Table_2.XLSX]

## Sheet: Title & table of contents
Development of a regionalized dynamic weighting method for the environmental impact of alternative protein sources
Sheet1	Title & table of contents	The sheet contains the orignal title of the manuscript and the table of contents
Sheet2	Data collection	This sheet contains the data collection and calculation of the novel protein sources, amount of protein supply per country
	Protein supply (g/capita/day)	The data for the protein supply originally present in the online database was converted from (g/capita/day) to (g/capita/year)
	Land Use (m2) per protein supply (g/capita/year) (2000-2016)	The land use according to the protein supply (g/capita/year) was calculated by the multiplication of average land use (1000g proteins) from alternative protein sources with the amount of protein supplies in countries (g/capita/year) and divided by 1000.
	(kgCO2eq) per protein supply (g(capita/year) (2000-2016)	The GHG emission according to the protein supply (g/capita/year) was calculated by the multiplication of average GHG (1000g proteins) from alternative protein sources with the amount of protein supplies in countries (g/capita/year) and divided by 1000.
	Stress-weighted (WU) per protein supply (g/capita/year) (2000-2016)	The water use according to the protein supply (g/capita/year) was calculated by the multiplication of average water use (1000g proteins) from alternative protein sources with the amount of protein supplies in countries (g/capita/year) and divided by 1000.
	Energy use (MJ) per protein supply (g/capita/year) (2000-2016)	The energy use according to the protein supply (g/capita/year) was calculated by the multiplication of average energy use (1000g proteins) from alternative protein sources with the amount of protein supplies in countries (g/capita/year) and divided by 1000.
	Arable Land Area (1000 Hectares) (2000-2016)	The values for the arable land use which was originally present according to 1000 hecaters was converted to m2 by the multiplication to 10^4
Sheet3	RIW Protein Supply (GW) per (ALU) per capita (2000-2016)	The relative impact weight of global warming acoording to protein supplies in countries was calcluated by dividing the GHG emission (kgCO2eq) according to protein supplies (g/capita/year) in countries by the arable land use (m2)
Sheet4	RIW Protein Supply (WU) per (ALU) per capita (2000-2016)	The relative impact weight of water use acoording to protein supplies in countries was calcluated by dividing the water use (L) according to protein supplies (g/capita/year) in countries by the arable land use (m2)
Sheet5	RIW Protein Supply (EU) per (ALU) per capita (2000-2016)	The relative impact weight of energy use acoording to protein supplies in countries was calcluated by dividing the energy use (MJ) according to protein supplies (g/capita/year) in countries by the arable land use (m2)
Sheet6	RIW Protein Supply (LU) per (ALU) per capita (2000-2016)	The relative impact weight of land use acoording to protein supplies in countries was calcluated by dividing the land use (m2) according to protein supplies (g/capita/year) in countries by the arable land use (m2)
Sheet7	Crickets eco-potential integrated (2000-2016)	Cricket eco-potential points were calculated by adding cricket eco-potential points for the four environmental impact indicators for global warming, water use, energy use and land use
Sheet8	Mealworms eco-potential integrated (2000-2016)	Mealworm eco-potential points were calculated by adding mealworm eco-potential points for the four environmental impact indicators for global warming, water use, energy use and land use
Sheet9	Cultured meat eco-potential integrated (2000-2016)	Cultured meat eco-potential points were calculated by adding cultured meat eco-potential points for the four environmental impact indicators for global warming, water use, energy use and land use
Sheet10	Black soilder Fly eco-potential integrated (2000-2016)	Black solider fly meat eco-potential points were calculated by adding black solider fly eco-potential points for the four environmental impact indicators for global warming, water use, energy use and land use
Sheet11	Chlorella eco-potential integrated (2000-2016)	Chlorella eco-potential points were calculated by adding chlorella eco-potential points for the four environmental impact indicators for global warming, water use, energy use and land use
Sheet12	House Fly eco-potential integrated (2000-2016)	House fly eco-potential points were calculated by adding house fly eco-potential points for the four environmental impact indicators for global warming, water use, energy use and land use
Sheet13	Spirulina eco-potential integrated (2000-2016)	Spirulina eco-potential points were calculated by adding spirulina eco-potential points for the four environmental impact indicators for global warming, water use, energy use and land use

## Sheet: 1. Data collectioncalculation
Novel protein sources	GWP (KgCO2eq/1000g Proteins)	Land Use (M2/1000g Proteins)	Water Use (L/1000g Proteins)	Energy Use (Mj/1000g Proteins)
Crickets (Thailand) future scenario	2.35	155	21132	96
Mealworms	12.2409	72.6252	23000	1842.69
Black soldier fly	14.7906	37.3409	2549.4	103.241
Housefly	2.65584	0.0586462	194.57	40.5664
Cultured Meat	30.8956	14.6896	1707.69	437.478
Chlorella	128.096	7.74883	7391	2306.48
Spirulina	112.892	4.75987	1900	1842.69
Average	43.4172	41.7461	8267.81	952.736
Protein Supply quantity (g/capita/day) (AP+VP)	China	United States	India	Russian Federation	Japan	Germany	Islamic Republic of Iran	Saudi Arabia	Indonesia	Canada	Mexico	South Africa	Brazil	Turkey	Australia	United Kingdom	Poland	France	Italy	Kazakhstan	Afghanistan	Albania	Algeria	Angola	Antigua and Barbuda	Argentina	Armenia	Austria	Azerbaijan	Barbados	Belarus	Belgium	Belize	Benin	Bolivia	Botswana	Bulgaria	Burkina Faso	Cameroon	Central African Republic	Chad	Chile	Colombia	Congo	Croatia	Cuba	Cyprus	Czechia	Denmark
2000	83.71	114.29	56.61	85.27	96.43	94.46	82.27	83.8	52.65	106.07	86.1	76.35	79.42	105.32	101.3	98.79	99.81	117.45	113.93	88.47	52.57	90.39	75.87	39.47	70.88	104.79	65.33	106.03	67.17	80.57	86.75	96.58	71.3	55.26	56.16	65.18	85.79	68.96	51.39	46.33	63.24	78.58	63.38	43.15	66.69	69.67	85.13	90.29	99.86
2001	83.4	112.78	56.14	86.82	96.67	97.86	82.68	82.7	52.42	105.05	87.67	76.08	79.74	103.22	100.78	100.71	99.62	119.08	113.66	88.12	49.67	92.83	77.35	40.25	69.09	101.28	65.25	106.89	68.95	85.02	88.46	100.83	74.93	53.95	55.54	68.04	84.36	68.99	55.17	47.05	64.81	79.6	63.74	44.46	72.34	72.08	85.26	92.84	107.62
2002	84.21	114.37	54.34	88.71	94.39	99	81.44	81.79	53.28	105.25	87.9	74.87	81.33	103.43	104.81	101.9	100.59	118.87	113.12	88.67	53.35	97.92	79.91	42.98	69.11	90.42	66.3	106.05	70.88	85.41	86.31	100.64	77.59	59.35	56.63	66.38	81.87	70.88	54.78	48.05	62.36	81.07	63.42	44.8	76.18	70.19	84.75	92.97	107.32
2003	84.8	114.56	54.32	90.01	94.38	97.95	82.2	81.44	53.46	104.01	87.37	75.7	84.42	102.71	109.64	103.08	101.03	116.25	111.69	91.2	54.54	95.79	82.16	43.28	70.19	92.55	70.15	102.09	73.1	85.74	85.38	99.47	78.65	56.73	57.25	61.22	78.55	75.86	54.57	46.7	63.67	83.69	63.1	47.08	75.65	76.93	80.14	92.99	103.36
2004	85.91	115.48	54	90.67	91.78	96.73	83.24	81.64	54.05	104.82	87.32	77.92	83.76	103.02	101.5	103.21	99.1	114.1	111.96	89.59	55.24	95.27	83.44	42.96	69.84	91.76	75.06	100.49	75.24	83.57	87.21	99.25	77.74	58.87	55.63	62.5	80.13	74.97	52.86	47.61	62.76	84.82	61.81	48.82	75.24	75.72	80.56	96.08	105.56
2005	86.94	115.09	53.66	94.2	92.39	96.96	84.39	83.72	53.62	102.11	87.06	78.93	83.08	103.29	104.91	103.57	98.71	111.29	111.36	89.99	53.51	98.24	84.11	44.62	83.4	96.09	77.37	102.69	81.91	89.67	89.1	99.26	76.39	57.78	57.97	59.63	77.82	73.13	57.1	48.06	62.89	85.87	62.24	40.11	78.13	77.82	78.53	99.33	115.63
2006	87.11	114.58	55.91	95.28	90.16	99.18	83.03	83.58	54.99	103.53	88.02	79.73	84.39	103.02	104.6	104.08	98.72	110.98	110.88	92.55	53.46	97.63	83.73	45.88	81.77	98.26	80.89	101.46	86.7	87.04	90.99	100.12	73.21	58.14	60.64	57.24	79.75	75.26	61.33	49.43	62.65	87.73	63.83	44.49	80.49	80.34	76.29	95.26	112.93
2007	89.16	114.85	57.99	98.52	90.65	102.49	84.41	85.04	56.1	104.39	88.65	81.04	85.27	102.67	108.33	104.45	99.59	110.6	110.73	93.66	56	97.28	83.21	47.9	83.69	98.83	82.22	103.67	87.76	90.53	92.01	101.18	72.66	60.06	63.28	57.35	76.13	76.37	61.39	50.49	60.89	85.6	64.05	44.11	81.54	81.35	80.9	95.06	110.58
2008	91.88	112.89	58.35	99.56	89.13	101.28	81.72	82.61	56.6	104.7	88.19	81.18	88.58	100.53	106.45	102.88	97.96	112.58	110.59	94.68	56.96	101.95	83.45	51.32	85.29	99.35	87.6	101.78	89.07	86.79	90.86	98.38	69.29	62.77	63.4	59.88	80.01	78.32	60.95	51.26	61.43	85.52	64.81	44.17	82.62	89.93	81.82	93.79	109.26
2009	92.63	110.9	57.68	99.62	87.06	102.56	85.03	82.93	57.94	103.14	86.87	80.38	88.54	100.72	103.33	102.09	100.66	111.19	112.01	94.95	57.79	101.91	86.53	51.49	83.44	98.37	84.58	102.36	89.37	86.01	91.56	96.11	69.89	63.27	62.95	64.19	80.48	79.73	62.38	52.15	61.25	82.1	61.54	47.15	84.17	87	79.22	92.58	103.86
2010	94.98	110.63	59.59	100.96	87.64	101.89	86.94	89.03	59.62	104.14	87.14	82.33	91.63	103.49	103.79	102.06	101.26	113.16	111.65	98.99	58.14	106.7	85.94	53.54	81.53	99.31	83.49	101.75	88.97	86.47	93.87	96.92	72.39	60.74	64.91	63.49	79.88	80.7	62.87	54.01	62.08	83.06	61.47	47.42	80.67	78.64	81.23	92.8	110.37
2011	95.64	108.62	60.03	101.26	87.41	103.19	86.71	89.28	61.21	103.9	85.44	83.47	94.5	104.46	105.88	102.93	102.31	111.82	109.88	96.45	58.91	108.59	90.09	56.04	84.8	100.62	86	103.27	91.67	85.99	98.04	96.57	71.11	62.27	65.89	63.71	81	79.51	64.78	53.7	62.15	85.29	62.54	53.66	81.71	83.83	80.4	90.82	106.38
2012	97.37	109.68	59.18	103.47	88.57	101.81	86.78	91.1	61.94	104.6	86.59	84.53	93.58	107.53	104.51	103.4	101.54	111.25	109.1	94.87	58.91	111.31	90.18	55.59	79.05	101.97	87.75	103.44	91.57	87.05	99.55	98.95	71.66	64.48	65.09	65.97	81.52	80.54	64.78	52.8	62.77	85.25	64.15	49.74	83.53	86.55	81.11	86.86	103.81
2013	98.02	109.6	60.25	102.84	87.73	101.59	87.28	91.63	62.18	104.95	87.63	85.33	94.99	108.12	106.28	103.21	101.47	110.52	108.51	96.41	58.25	111.42	91.96	57.26	83.71	102.64	90.04	106.21	93.15	88.24	93.82	99.59	73.27	64.43	66.01	64.86	83.53	79.38	65.66	46.06	62.72	87.36	64.38	51.66	84.35	90.86	77.61	87.47	108.88
2014	98.04	111.04	61.38	103.5	86.34	103.36	85.89	89.73	64.51	102.72	91.92	83.51	91.73	102.19	108.46	101.89	100.74	111.23	106.89	91.59	56.11	113.53	95.44	58.78	82.73	101.61	98.26	109.42	91.12	88.01	94.78	100.81	68.68	68.51	66.16	69.64	86.82	77.97	65.02	46.25	66.2	86.32	68.21	51.67	84.44	83.99	78.79	88.18	107.42
2015	100.06	112.24	61.96	103.19	85.92	104.08	85.44	90.45	65.14	98.47	92.2	83.14	90.28	102.69	108.73	103.85	99.75	111.21	106.96	94.5	54.62	111.78	94.33	55.28	82.32	105.37	97.04	107.83	90.84	89.91	92.22	102.33	68.67	66.9	68.72	69.32	80.64	77.53	64.51	45.61	71.33	86	70.11	55.29	87.27	81.07	78.91	87.43	106.28
2016	100.53	113.04	63.11	101.6	85.54	104.95	86.48	87.46	66.84	100.78	93.23	83.55	90.59	102.96	108.14	104.68	100.75	111.91	105.88	92.44	54.56	117.28	92.45	52.38	76.94	102.79	96.5	108.4	92.15	90.4	91.99	100.4	69.61	65.55	68.99	67.87	85.83	77.46	64.76	46.03	71.76	88.06	70.97	55.36	90.01	87.86	79.14	88.46	111.61
Protein Supply quantity (g/capita/year) (AP+VP)	China	United States	India	Russian Federation	Japan	Germany	Islamic Republic of Iran	Saudi Arabia	Indonesia	Canada	Mexico	South Africa	Brazil	Turkey	Australia	United Kingdom	Poland	France	Italy	Kazakhstan	Afghanistan	Albania	Algeria	Angola	Antigua and Barbuda	Argentina	Armenia	Austria	Azerbaijan	Barbados	Belarus	Belgium	Belize	Benin	Bolivia	Botswana	Bulgaria	Burkina Faso	Cameroon	Central African Republic	Chad	Chile	Colombia	Congo	Croatia	Cuba	Cyprus	Czechia	Denmark
2000	30554.2	41715.8	20662.7	31123.5	35196.9	34477.9	30028.5	30587	19217.2	38715.6	31426.5	27867.8	28988.3	38441.8	36974.5	36058.3	36430.7	42869.2	41584.4	32291.5	19188	32992.3	27692.5	14406.5	25871.2	38248.3	23845.5	38700.9	24517	29408	31663.8	35251.7	26024.5	20169.9	20498.4	23790.7	31313.3	25170.4	18757.3	16910.5	23082.6	28681.7	23133.7	15749.8	24341.8	25429.5	31072.5	32955.8	36448.9
2001	30441	41164.7	20491.1	31689.3	35284.6	35718.9	30178.2	30185.5	19133.3	38343.2	31999.5	27769.2	29105.1	37675.3	36784.7	36759.2	36361.3	43464.2	41485.9	32163.8	18129.5	33882.9	28232.8	14691.2	25217.8	36967.2	23816.2	39014.8	25166.8	31032.3	32287.9	36802.9	27349.5	19691.8	20272.1	24834.6	30791.4	25181.3	20137	17173.2	23655.7	29054	23265.1	16227.9	26404.1	26309.2	31119.9	33886.6	39281.3
2002	30736.7	41745.1	19834.1	32379.2	34452.3	36135	29725.6	29853.3	19447.2	38416.2	32083.5	27327.5	29685.5	37751.9	38255.7	37193.5	36715.3	43387.6	41288.8	32364.5	19472.8	35740.8	29167.2	15687.7	25225.2	33003.3	24199.5	38708.2	25871.2	31174.7	31503.2	36733.6	28320.3	21662.8	20670	24228.7	29882.5	25871.2	19994.7	17538.2	22761.4	29590.5	23148.3	16352	27805.7	25619.3	30933.8	33934.1	39171.8
2003	30952	41814.4	19826.8	32853.7	34448.7	35751.8	30003	29725.6	19512.9	37963.7	31890	27630.5	30813.3	37489.2	40018.6	37624.2	36875.9	42431.2	40766.8	33288	19907.1	34963.3	29988.4	15797.2	25619.3	33780.8	25604.8	37262.8	26681.5	31295.1	31163.7	36306.6	28707.2	20706.5	20896.2	22345.3	28670.8	27688.9	19918	17045.5	23239.5	30546.8	23031.5	17184.2	27612.2	28079.5	29251.1	33941.3	37726.4
2004	31357.2	42150.2	19710	33094.6	33499.7	35306.4	30382.6	29798.6	19728.2	38259.3	31871.8	28440.8	30572.4	37602.3	37047.5	37671.7	36171.5	41646.5	40865.4	32700.3	20162.6	34773.6	30455.6	15680.4	25491.6	33492.4	27396.9	36678.8	27462.6	30503	31831.7	36226.2	28375.1	21487.5	20305	22812.5	29247.5	27364	19293.9	17377.7	22907.4	30959.3	22560.7	17819.3	27462.6	27637.8	29404.4	35069.2	38529.4
2005	31733.1	42007.8	19585.9	34383	33722.3	35390.4	30802.3	30557.8	19571.3	37270.2	31776.9	28809.5	30324.2	37700.8	38292.2	37803.1	36029.2	40620.8	40646.4	32846.3	19531.2	35857.6	30700.2	16286.3	30441	35072.8	28240	37481.8	29897.2	32729.5	32521.5	36229.9	27882.3	21089.7	21159	21765	28404.3	26692.5	20841.5	17541.9	22954.8	31342.5	22717.6	14640.1	28517.5	28404.3	28663.5	36255.4	42204.9
2006	31795.2	41821.7	20407.2	34777.2	32908.4	36200.7	30306	30506.7	20071.3	37788.4	32127.3	29101.5	30802.3	37602.3	38179	37989.2	36032.8	40507.7	40471.2	33780.8	19512.9	35634.9	30561.5	16746.2	29846	35864.9	29524.8	37032.9	31645.5	31769.6	33211.3	36543.8	26721.7	21221.1	22133.6	20892.6	29108.8	27469.9	22385.5	18042	22867.2	32021.5	23298	16238.9	29378.8	29324.1	27845.8	34769.9	41219.4
2007	32543.4	41920.2	21166.3	35959.8	33087.2	37408.8	30809.7	31039.6	20476.5	38102.3	32357.2	29579.6	31123.5	37474.6	39540.4	38124.2	36350.3	40369	40416.4	34185.9	20440	35507.2	30371.7	17483.5	30546.8	36072.9	30010.3	37839.6	32032.4	33043.4	33583.7	36930.7	26520.9	21921.9	23097.2	20932.8	27787.5	27875	22407.3	18428.8	22224.8	31244	23378.2	16100.1	29762.1	29692.8	29528.5	34696.9	40361.7
2008	33536.2	41204.8	21297.8	36339.4	32532.5	36967.2	29827.8	30152.7	20659	38215.5	32189.3	29630.7	32331.7	36693.4	38854.2	37551.2	35755.4	41091.7	40365.3	34558.2	20790.4	37211.8	30459.2	18731.8	31130.8	36262.8	31974	37149.7	32510.5	31678.3	33163.9	35908.7	25290.8	22911	23141	21856.2	29203.7	28586.8	22246.8	18709.9	22422	31214.8	23655.7	16122	30156.3	32824.4	29864.3	34233.3	39879.9
2009	33809.9	40478.5	21053.2	36361.3	31776.9	37434.4	31036	30269.5	21148.1	37646.1	31707.5	29338.7	32317.1	36762.8	37715.4	37262.8	36740.9	40584.3	40883.7	34656.8	21093.3	37197.2	31583.5	18793.8	30455.6	35905.1	30871.7	37361.4	32620	31393.7	33419.4	35080.2	25509.8	23093.5	22976.8	23429.3	29375.2	29101.5	22768.7	19034.8	22356.2	29966.5	22462.1	17209.8	30722	31755	28915.3	33791.7	37908.9
2010	34667.7	40379.9	21750.3	36850.4	31988.6	37189.8	31733.1	32496	21761.3	38011.1	31806.1	30050.5	33444.9	37773.8	37883.3	37251.9	36959.9	41303.4	40752.2	36131.3	21221.1	38945.5	31368.1	19542.1	29758.5	36248.2	30473.8	37138.8	32474	31561.5	34262.6	35375.8	26422.3	22170.1	23692.2	23173.8	29156.2	29455.5	22947.5	19713.7	22659.2	30316.9	22436.5	17308.3	29444.5	28703.6	29649	33872	40285.1
2011	34908.6	39646.3	21911	36959.9	31904.7	37664.3	31649.2	32587.2	22341.7	37923.5	31185.6	30466.5	34492.5	38127.9	38646.2	37569.4	37343.2	40814.3	40106.2	35204.2	21502.2	39635.3	32882.8	20454.6	30952	36726.3	31390	37693.6	33459.6	31386.3	35784.6	35248.1	25955.2	22728.5	24049.8	23254.2	29565	29021.2	23644.7	19600.5	22684.8	31130.8	22827.1	19585.9	29824.2	30598	29346	33149.3	38828.7
2012	35540.1	40033.2	21600.7	37766.6	32328	37160.7	31674.7	33251.5	22608.1	38179	31605.3	30853.5	34156.7	39248.4	38146.2	37741	37062.1	40606.2	39821.5	34627.6	21502.2	40628.2	32915.7	20290.3	28853.2	37219.1	32028.8	37755.6	33423.1	31773.2	36335.8	36116.8	26155.9	23535.2	23757.8	24079	29754.8	29397.1	23644.7	19272	22911	31116.2	23414.8	18155.1	30488.5	31590.8	29605.2	31703.9	37890.7
2013	35777.3	40004	21991.2	37536.6	32021.5	37080.3	31857.2	33444.9	22695.7	38306.8	31985	31145.5	34671.3	39463.8	38792.2	37671.7	37036.6	40339.8	39606.2	35189.7	21261.2	40668.3	33565.4	20899.9	30554.2	37463.6	32864.6	38766.7	33999.8	32207.6	34244.3	36350.3	26743.5	23517	24093.7	23673.9	30488.5	28973.7	23965.9	16811.9	22892.8	31886.4	23498.7	18855.9	30787.8	33163.9	28327.7	31926.5	39741.2
2014	35784.6	40529.6	22403.7	37777.5	31514.1	37726.4	31349.8	32751.5	23546.2	37492.8	33550.8	30481.2	33481.4	37299.3	39587.9	37189.8	36770.1	40598.9	39014.8	33430.3	20480.2	41438.4	34835.6	21454.7	30196.5	37087.7	35864.9	39938.3	33258.8	32123.7	34594.7	36795.7	25068.2	25006.2	24148.4	25418.6	31689.3	28459	23732.3	16881.2	24163	31506.8	24896.7	18859.5	30820.6	30656.3	28758.3	32185.7	39208.3
2015	36521.9	40967.6	22615.4	37664.3	31360.8	37989.2	31185.6	33014.2	23776.1	35941.6	33653	30346.1	32952.2	37481.8	39686.4	37905.2	36408.8	40591.7	39040.4	34492.5	19936.3	40799.7	34430.4	20177.2	30046.8	38460.1	35419.6	39357.9	33156.6	32817.2	33660.3	37350.4	25064.5	24418.5	25082.8	25301.8	29433.6	28298.5	23546.2	16647.7	26035.5	31390	25590.2	20180.8	31853.5	29590.5	28802.2	31912	38792.2
2016	36693.4	41259.6	23035.2	37084	31222.1	38306.8	31565.2	31922.9	24396.6	36784.7	34028.9	30495.8	33065.3	37580.4	39471.1	38208.2	36773.8	40847.2	38646.2	33740.6	19914.4	42807.2	33744.2	19118.7	28083.1	37518.3	35222.5	39566	33634.8	32996	33576.3	36646	25407.7	23925.8	25181.3	24772.5	31328	28272.9	23637.4	16801	26192.4	32141.9	25904	20206.4	32853.7	32068.9	28886.1	32287.9	40737.7
Land Use (M2) per protein supply (g) per capita per year	China	United States	India	Russian Federation	Japan	Germany	Islamic Republic of Iran	Saudi Arabia	Indonesia	Canada	Mexico	South Africa	Brazil	Turkey	Australia	United Kingdom	Poland	France	Italy	Kazakhstan	Afghanistan	Albania	Algeria	Angola	Antigua and Barbuda	Argentina	Armenia	Austria	Azerbaijan	Barbados	Belarus	Belgium	Belize	Benin	Bolivia	Botswana	Bulgaria	Burkina Faso	Cameroon	Central African Republic	Chad	Chile	Colombia	Congo	Croatia	Cuba	Cyprus	Czechia	Denmark
2000	1275.52	1741.48	862.586	1299.29	1469.34	1439.32	1253.58	1276.89	802.246	1616.23	1311.94	1163.37	1210.15	1604.8	1543.54	1505.3	1520.84	1789.63	1735.99	1348.05	801.027	1377.3	1156.06	601.418	1080.02	1596.72	995.456	1615.62	1023.49	1227.67	1321.84	1471.62	1086.42	842.016	855.729	993.17	1307.21	1050.77	783.047	705.946	963.61	1197.35	965.743	657.491	1016.18	1061.59	1297.16	1375.78	1521.6
2001	1270.79	1718.47	855.424	1322.91	1472.99	1491.13	1259.82	1260.13	798.742	1600.68	1335.86	1159.26	1215.03	1572.8	1535.62	1534.55	1517.94	1814.46	1731.88	1342.71	756.839	1414.48	1178.61	613.303	1052.75	1543.24	994.237	1628.72	1050.61	1295.48	1347.9	1536.38	1141.73	822.055	846.282	1036.75	1285.42	1051.22	840.644	716.917	987.532	1212.89	971.228	677.452	1102.27	1098.31	1299.14	1414.64	1639.84
2002	1283.14	1742.7	827.997	1351.7	1438.25	1508.5	1240.93	1246.26	811.846	1603.73	1339.36	1140.82	1239.25	1576	1597.03	1552.69	1532.72	1811.26	1723.65	1351.1	812.912	1492.04	1217.62	654.901	1053.05	1377.76	1010.24	1615.92	1080.02	1301.42	1315.14	1533.49	1182.27	904.336	862.891	1011.45	1247.48	1080.02	834.702	732.154	950.201	1235.29	966.352	682.633	1160.78	1069.51	1291.36	1416.62	1635.27
2003	1292.13	1745.59	827.693	1371.51	1438.1	1492.5	1252.51	1240.93	814.588	1584.84	1331.29	1153.47	1286.34	1565.03	1670.62	1570.67	1539.43	1771.34	1701.86	1389.65	831.045	1459.59	1251.9	659.472	1069.51	1410.22	1068.9	1555.58	1113.85	1306.45	1300.96	1515.66	1198.42	864.415	872.338	932.83	1196.89	1155.9	831.502	711.584	970.162	1275.21	961.476	717.374	1152.71	1172.21	1221.12	1416.92	1574.93
2004	1309.04	1759.61	822.817	1381.57	1398.48	1473.91	1268.36	1243.98	823.578	1597.18	1330.52	1187.29	1276.28	1569.75	1546.59	1572.65	1510.02	1738.58	1705.97	1365.11	841.711	1451.66	1271.4	654.596	1064.18	1398.18	1143.72	1531.2	1146.46	1273.38	1328.85	1512.31	1184.55	897.022	847.653	952.334	1220.97	1142.34	805.446	725.45	956.296	1292.43	941.82	743.887	1146.46	1153.77	1227.52	1464	1608.45
2005	1324.73	1753.67	817.636	1435.36	1407.78	1477.41	1285.88	1275.67	817.026	1555.89	1326.56	1202.68	1265.92	1573.87	1598.55	1578.13	1504.08	1695.76	1696.83	1371.21	815.35	1496.92	1281.61	679.89	1270.79	1464.16	1178.91	1564.72	1248.09	1366.33	1357.65	1512.46	1163.98	880.414	883.309	908.603	1185.77	1114.31	870.052	732.307	958.277	1308.43	948.372	611.17	1190.49	1185.77	1196.59	1513.53	1761.89
2006	1327.33	1745.89	851.92	1451.81	1373.8	1511.24	1265.16	1273.54	837.902	1577.52	1341.19	1214.87	1285.88	1569.75	1593.83	1585.9	1504.23	1691.04	1689.52	1410.22	814.588	1487.62	1275.82	699.089	1245.96	1497.22	1232.55	1545.98	1321.08	1326.26	1386.45	1525.56	1115.53	885.899	923.993	872.186	1215.18	1146.76	934.506	753.182	954.62	1336.77	972.6	677.909	1226.45	1224.17	1162.46	1451.51	1720.75
2007	1358.56	1750.01	883.614	1501.18	1381.27	1561.68	1286.18	1295.78	854.815	1590.63	1350.79	1234.83	1299.29	1564.42	1650.66	1591.54	1517.49	1685.25	1687.23	1427.13	853.291	1482.29	1267.9	729.869	1275.21	1505.91	1252.81	1579.66	1337.23	1379.44	1401.99	1541.71	1107.15	915.155	964.219	873.862	1160.02	1163.68	935.421	769.334	927.802	1304.32	975.952	672.119	1242.45	1239.56	1232.7	1448.46	1684.95
2008	1400.01	1720.14	889.099	1517.03	1358.1	1543.24	1245.2	1258.76	862.434	1595.35	1343.78	1236.97	1349.72	1531.81	1622.02	1567.62	1492.65	1715.42	1685.1	1442.67	867.919	1553.45	1271.56	781.981	1299.59	1513.83	1334.79	1550.86	1357.19	1322.45	1384.47	1499.05	1055.8	956.448	966.048	912.412	1219.14	1193.39	928.716	781.066	936.03	1303.1	987.532	673.033	1258.91	1370.29	1246.72	1429.11	1664.83
2009	1411.44	1689.82	878.89	1517.94	1326.56	1562.74	1295.63	1263.63	882.852	1571.58	1323.67	1224.78	1349.11	1534.71	1574.47	1555.58	1533.79	1694.24	1706.73	1446.79	880.566	1552.84	1318.49	784.571	1271.4	1498.9	1288.77	1559.69	1361.76	1310.56	1395.13	1464.46	1064.94	964.067	959.191	978.085	1226.3	1214.87	950.506	794.627	933.287	1250.99	937.706	718.441	1282.53	1325.65	1207.1	1410.67	1582.55
2010	1447.24	1685.71	907.993	1538.36	1335.4	1552.53	1324.73	1356.58	908.45	1586.82	1327.78	1254.49	1396.2	1576.91	1581.48	1555.12	1542.93	1724.26	1701.25	1508.34	885.899	1625.82	1309.5	815.807	1242.3	1513.22	1272.17	1550.4	1355.67	1317.57	1430.33	1476.8	1103.03	925.516	989.056	967.419	1217.16	1229.65	957.972	822.969	945.934	1265.61	936.64	722.555	1229.2	1198.26	1237.73	1414.03	1681.75
2011	1457.3	1655.08	914.698	1542.93	1331.9	1572.34	1321.23	1360.39	932.678	1583.16	1301.88	1271.86	1439.93	1591.69	1613.33	1568.38	1558.93	1703.84	1674.28	1469.64	897.632	1654.62	1372.73	853.901	1292.13	1533.18	1310.41	1573.56	1396.81	1310.26	1493.87	1471.47	1083.53	948.829	1003.99	970.771	1234.22	1211.52	987.075	818.245	947.001	1299.59	952.944	817.636	1245.04	1277.35	1225.08	1383.86	1620.95
2012	1483.66	1671.23	901.746	1576.61	1349.57	1551.31	1322.3	1388.12	943.801	1593.83	1319.4	1288.01	1425.91	1638.47	1592.45	1575.54	1547.2	1695.15	1662.39	1445.57	897.632	1696.07	1374.1	847.044	1204.51	1553.75	1337.08	1576.15	1395.28	1326.41	1516.88	1507.74	1091.91	982.504	991.799	1005.21	1242.15	1227.22	987.075	804.532	956.448	1298.98	977.476	757.905	1272.78	1318.79	1235.9	1323.52	1581.79
2013	1493.56	1670.01	918.05	1567.01	1336.77	1547.96	1329.92	1396.2	947.458	1599.16	1335.25	1300.2	1447.4	1647.46	1619.42	1572.65	1546.13	1684.03	1653.4	1469.03	887.575	1697.74	1401.23	872.49	1275.52	1563.96	1371.97	1618.36	1419.36	1344.54	1429.57	1517.49	1116.44	981.742	1005.82	988.294	1272.78	1209.54	1000.48	701.832	955.686	1331.13	980.98	787.161	1285.27	1384.47	1182.57	1332.81	1659.04
2014	1493.87	1691.95	935.268	1577.07	1315.59	1574.93	1308.74	1367.25	982.961	1565.18	1400.62	1272.47	1397.72	1557.1	1652.64	1552.53	1535.01	1694.85	1628.72	1395.59	854.967	1729.9	1454.25	895.651	1260.59	1548.27	1497.22	1667.27	1388.43	1341.04	1444.2	1536.08	1046.5	1043.91	1008.1	1061.13	1322.91	1188.06	990.732	704.727	1008.71	1315.29	1039.34	787.314	1286.64	1279.78	1200.55	1343.63	1636.8
2015	1524.65	1710.24	944.106	1572.34	1309.19	1585.9	1301.88	1378.22	992.561	1500.42	1404.88	1266.83	1375.63	1564.72	1656.76	1582.4	1519.93	1694.55	1629.79	1439.93	832.264	1703.23	1437.34	842.32	1254.34	1605.56	1478.63	1643.04	1384.16	1369.99	1405.19	1559.24	1046.35	1019.38	1047.11	1056.25	1228.74	1181.35	982.961	694.975	1086.88	1310.41	1068.29	842.473	1329.76	1235.29	1202.38	1332.2	1619.42
2016	1531.81	1722.43	961.629	1548.11	1303.4	1599.16	1317.73	1332.66	1018.46	1535.62	1420.58	1273.08	1380.35	1568.84	1647.77	1595.05	1535.16	1705.21	1613.33	1408.54	831.349	1787.04	1408.69	798.132	1172.36	1566.25	1470.4	1651.73	1404.12	1377.46	1401.68	1529.83	1060.67	998.808	1051.22	1034.16	1307.82	1180.28	986.77	701.375	1093.43	1341.8	1081.39	843.539	1371.51	1338.75	1205.88	1347.9	1700.64
(kg CO2 eq) per protein supply (g) per capita per year	China	United States	India	Russian Federation	Japan	Germany	Islamic Republic of Iran	Saudi Arabia	Indonesia	Canada	Mexico	South Africa	Brazil	Turkey	Australia	United Kingdom	Poland	France	Italy	Kazakhstan	Afghanistan	Albania	Algeria	Angola	Antigua and Barbuda	Argentina	Armenia	Austria	Azerbaijan	Barbados	Belarus	Belgium	Belize	Benin	Bolivia	Botswana	Bulgaria	Burkina Faso	Cameroon	Central African Republic	Chad	Chile	Colombia	Congo	Croatia	Cuba	Cyprus	Czechia	Denmark
2000	1326.58	1811.19	897.115	1351.3	1528.15	1496.94	1303.76	1328	834.36	1680.92	1364.45	1209.94	1258.59	1669.04	1605.33	1565.55	1581.72	1861.26	1805.48	1402.01	833.092	1432.44	1202.33	625.493	1123.26	1660.64	1035.3	1680.29	1064.46	1276.82	1374.75	1530.53	1129.91	875.721	889.984	1032.93	1359.54	1092.83	814.392	734.205	1002.18	1245.28	1004.4	683.811	1056.86	1104.08	1349.08	1430.85	1582.51
2001	1321.66	1787.26	889.667	1375.86	1531.96	1550.82	1310.25	1310.57	830.715	1664.76	1389.33	1205.66	1263.66	1635.76	1597.09	1595.98	1578.71	1887.1	1801.2	1396.46	787.135	1471.1	1225.79	637.854	1094.89	1605.01	1034.04	1693.92	1092.67	1347.34	1401.85	1597.88	1187.44	854.961	880.159	1078.25	1336.88	1093.3	874.295	745.615	1027.06	1261.44	1010.11	704.571	1146.39	1142.27	1351.14	1471.26	1705.49
2002	1334.5	1812.45	861.142	1405.81	1495.83	1568.88	1290.6	1296.15	844.344	1667.93	1392.98	1186.49	1288.86	1639.09	1660.95	1614.84	1594.08	1883.77	1792.65	1405.18	845.453	1551.77	1266.36	681.117	1095.21	1432.91	1050.68	1680.61	1123.26	1353.52	1367.78	1594.87	1229.59	940.537	897.432	1051.94	1297.42	1123.26	868.115	761.462	988.237	1284.74	1005.04	709.959	1207.25	1112.32	1343.06	1473.32	1700.73
2003	1343.85	1815.47	860.825	1426.41	1495.67	1552.24	1302.65	1290.6	847.196	1648.28	1384.58	1199.64	1337.83	1627.68	1737.5	1633.54	1601.05	1842.25	1769.98	1445.27	864.311	1518.01	1302.01	685.871	1112.32	1466.67	1111.69	1617.85	1158.44	1358.75	1353.04	1576.33	1246.39	899.017	907.258	970.171	1244.8	1202.18	864.787	740.069	1009	1326.26	999.964	746.091	1198.85	1219.13	1270	1473.64	1637.98
2004	1361.44	1830.05	855.754	1436.87	1454.46	1532.91	1319.13	1293.77	856.546	1661.11	1383.79	1234.82	1327.37	1632.59	1608.5	1635.6	1570.47	1808.18	1774.26	1419.76	875.404	1509.77	1322.3	680.8	1106.77	1454.15	1189.5	1592.49	1192.35	1324.36	1382.04	1572.84	1231.97	932.93	881.585	990.456	1269.84	1188.07	837.688	754.49	994.576	1344.17	979.521	773.665	1192.35	1199.96	1276.66	1522.61	1672.84
2005	1377.76	1823.86	850.366	1492.81	1464.13	1536.55	1337.35	1326.74	849.732	1618.17	1379.67	1250.83	1316.59	1636.87	1662.54	1641.3	1564.29	1763.65	1764.75	1426.1	847.989	1556.84	1332.92	707.106	1321.66	1522.77	1226.11	1627.36	1298.05	1421.03	1411.99	1573	1210.57	915.657	918.668	944.974	1233.24	1158.91	904.88	761.621	996.636	1360.81	986.336	635.635	1238.15	1233.24	1244.49	1574.11	1832.42
2006	1380.46	1815.78	886.022	1509.93	1428.79	1571.73	1315.8	1324.52	871.443	1640.67	1394.88	1263.5	1337.35	1632.59	1657.63	1649.39	1564.44	1758.73	1757.15	1466.67	847.196	1547.17	1326.89	727.074	1295.83	1557.15	1281.89	1607.87	1373.96	1379.35	1441.95	1586.63	1160.18	921.362	960.98	907.099	1263.82	1192.67	971.914	783.332	992.833	1390.28	1011.53	705.046	1275.55	1273.17	1208.99	1509.61	1789.63
2007	1412.94	1820.06	918.985	1561.28	1436.56	1624.19	1337.67	1347.65	889.033	1654.3	1404.86	1284.26	1351.3	1627.04	1716.74	1655.25	1578.23	1752.71	1754.77	1484.26	887.448	1541.62	1318.65	759.085	1326.26	1566.19	1302.96	1642.89	1390.76	1434.66	1458.11	1603.43	1151.46	951.788	1002.82	908.842	1206.45	1210.26	972.865	800.13	964.942	1356.53	1015.02	699.024	1292.19	1289.18	1282.05	1506.44	1752.39
2008	1456.05	1789	924.69	1577.76	1412.47	1605.01	1295.04	1309.14	896.957	1659.21	1397.57	1286.48	1403.75	1593.13	1686.94	1630.37	1552.4	1784.09	1752.55	1500.42	902.662	1615.63	1322.46	813.283	1351.62	1574.43	1388.22	1612.94	1411.52	1375.39	1439.89	1559.06	1098.06	994.735	1004.72	948.936	1267.94	1241.16	965.892	812.332	973.499	1355.26	1027.06	699.975	1309.3	1425.15	1296.63	1486.32	1731.48
2009	1467.93	1757.46	914.072	1578.71	1379.67	1625.3	1347.5	1314.22	918.192	1634.49	1376.65	1273.81	1403.12	1596.14	1637.5	1617.85	1595.19	1762.06	1775.06	1504.7	915.815	1615	1371.27	815.977	1322.3	1558.9	1340.36	1622.13	1416.27	1363.03	1450.98	1523.08	1107.57	1002.66	997.587	1017.24	1275.39	1263.5	988.554	826.436	970.647	1301.06	975.242	747.2	1333.87	1378.71	1255.42	1467.14	1645.9
2010	1505.18	1753.19	944.34	1599.94	1388.86	1614.68	1377.76	1410.88	944.816	1650.34	1380.93	1304.71	1452.09	1640.04	1644.79	1617.37	1604.7	1793.28	1769.35	1568.72	921.362	1690.91	1361.92	848.464	1292.03	1573.79	1323.09	1612.46	1409.93	1370.32	1487.59	1535.92	1147.19	962.565	1028.65	1006.14	1265.88	1278.88	996.319	855.912	983.8	1316.28	974.133	751.479	1278.4	1246.23	1287.28	1470.63	1749.07
2011	1515.64	1721.33	951.313	1604.7	1385.21	1635.28	1374.12	1414.85	970.013	1646.53	1353.99	1322.77	1497.57	1655.41	1677.91	1631.16	1621.34	1772.04	1741.3	1528.47	933.564	1720.86	1427.68	888.082	1343.85	1594.55	1362.87	1636.55	1452.72	1362.71	1553.67	1530.37	1126.9	986.811	1044.18	1009.63	1283.63	1260.02	1026.59	851	984.909	1351.62	991.09	850.366	1294.88	1328.48	1274.12	1439.25	1685.84
2012	1543.05	1738.13	937.843	1639.72	1403.59	1613.41	1375.23	1443.69	981.581	1657.63	1372.22	1339.57	1482.99	1704.06	1656.2	1638.61	1609.13	1763.01	1728.94	1503.43	933.564	1763.96	1429.11	880.951	1252.73	1615.95	1390.6	1639.24	1451.14	1379.51	1577.6	1568.09	1135.62	1021.83	1031.5	1045.45	1291.87	1276.34	1026.59	836.737	994.735	1350.98	1016.6	788.244	1323.72	1371.58	1285.37	1376.5	1645.11
2013	1553.35	1736.86	954.799	1629.74	1390.28	1609.93	1383.15	1452.09	985.385	1663.17	1388.7	1352.25	1505.33	1713.41	1684.25	1635.6	1608.02	1751.44	1719.59	1527.84	923.105	1765.71	1457.32	907.416	1326.58	1626.57	1426.89	1683.14	1476.18	1398.37	1486.79	1578.23	1161.13	1021.04	1046.08	1027.86	1323.72	1257.96	1040.53	729.926	993.942	1384.42	1020.25	818.671	1336.72	1439.89	1229.91	1386.16	1725.45
2014	1553.67	1759.68	972.707	1640.19	1368.26	1637.98	1361.12	1421.98	1022.31	1627.83	1456.68	1323.41	1453.67	1619.43	1718.8	1614.68	1596.46	1762.69	1693.92	1451.45	889.192	1799.14	1512.47	931.504	1311.05	1610.24	1557.15	1734.01	1444.01	1394.72	1502.01	1597.57	1088.39	1085.7	1048.46	1103.61	1375.86	1235.61	1030.39	732.937	1049.09	1367.94	1080.94	818.83	1338.15	1331.01	1248.61	1397.41	1702.32
2015	1585.68	1778.7	981.898	1635.28	1361.6	1649.39	1353.99	1433.39	1032.29	1560.48	1461.12	1317.54	1430.69	1627.36	1723.08	1645.74	1580.77	1762.38	1695.03	1497.57	865.579	1771.41	1494.88	876.038	1304.55	1669.83	1537.82	1708.81	1439.57	1424.83	1461.44	1621.65	1088.23	1060.18	1089.03	1098.53	1277.93	1228.64	1022.31	722.795	1130.39	1362.87	1111.05	876.197	1382.99	1284.74	1250.51	1385.53	1684.25
2016	1593.13	1791.38	1000.12	1610.08	1355.58	1663.17	1370.47	1386	1059.23	1597.09	1477.44	1324.04	1435.61	1631.64	1713.73	1658.89	1596.61	1773.47	1677.91	1464.92	864.628	1858.57	1465.08	830.081	1219.29	1628.94	1529.26	1717.85	1460.33	1432.6	1457.79	1591.07	1103.13	1038.79	1093.3	1075.56	1360.17	1227.53	1026.27	729.451	1137.2	1395.51	1124.68	877.306	1426.41	1392.34	1254.15	1401.85	1768.72
Water Use (WU) per protein supply (g) per capita per year	China	United States	India	Russian Federation	Japan	Germany	Islamic Republic of Iran	Saudi Arabia	Indonesia	Canada	Mexico	South Africa	Brazil	Turkey	Australia	United Kingdom	Poland	France	Italy	Kazakhstan	Afghanistan	Albania	Algeria	Angola	Antigua and Barbuda	Argentina	Armenia	Austria	Azerbaijan	Barbados	Belarus	Belgium	Belize	Benin	Bolivia	Botswana	Bulgaria	Burkina Faso	Cameroon	Central African Republic	Chad	Chile	Colombia	Congo	Croatia	Cuba	Cyprus	Czechia	Denmark
2000	252616	344899	170835	257324	291002	285057	248270	252887	158885	320093	259828	230405	239670	317829	305698	298124	301202	354435	343812	266980	158643	272774	228957	119111	213898	316230	197150	319972	202702	243140	261790	291454	215166	166761	169477	196697	258893	208104	155082	139812	190843	237135	191265	130216	201254	210247	256901	272473	301353
2001	251680	340342	169416	262001	291726	295317	249508	249568	158190	317015	264566	229590	240635	311492	304129	303918	300628	359354	342997	265924	149892	280138	233423	121464	208496	305638	196908	322567	208074	256569	266950	304280	226120	162808	167606	205328	254577	208195	166489	141985	195580	240213	192351	134169	218304	217519	257293	280168	324770
2002	254125	345140	163985	267705	284845	298757	245766	246822	160786	317618	265260	225939	245434	312126	316290	307509	303555	358720	341368	267584	160997	295498	241148	129703	208557	272865	200077	320032	213898	257746	260462	303706	234147	179103	170895	200318	247063	213898	165312	145003	188187	244649	191386	135195	229892	211816	255754	280560	323865
2003	255905	345713	163924	271628	284815	295589	248059	245766	161329	313876	263661	228444	254758	309953	330866	311070	304883	350813	337052	275219	164588	289070	247938	130608	211816	279293	211695	308082	220598	258742	257655	300176	237346	171197	172766	184747	237044	228927	164679	140929	192140	252555	190420	142076	228293	232156	241842	280621	311915
2004	259255	348490	162958	273619	276969	291907	251198	246369	163109	316321	263510	235143	252767	310889	306302	311462	299059	344325	337867	270360	166701	287501	251801	129643	210760	276909	226512	303254	227056	252193	263178	299512	234600	177655	167877	188609	241812	226241	159518	143675	189394	255966	186527	147327	227056	228504	243110	289945	318554
2005	262363	347313	161932	284272	278810	292601	254668	252646	161812	308142	262725	238191	250715	311703	316592	312548	297882	335845	336057	271567	161480	296464	253823	134652	251680	289976	233483	309893	247184	270602	268882	299542	230526	174366	174939	179948	234841	220688	172314	145033	189786	259134	187825	121042	235777	234841	236984	299753	348942
2006	262876	345774	168722	287531	272080	299300	250564	252224	165946	312428	265622	240605	254668	310889	315657	314087	297912	334910	334608	279293	161329	294623	252676	138454	246761	296524	244106	306181	261639	262665	274585	302137	220929	175452	182996	172736	240666	227116	185079	149167	189062	264747	192623	134260	242899	242446	230224	287471	340795
2007	269063	346589	174999	297309	273559	309289	254728	256629	169296	315023	267524	244558	257324	309832	326913	315204	300538	333763	334155	282642	168994	293567	251107	144550	252555	298244	248119	312850	264838	273197	277663	305336	219270	181246	190963	173068	229741	230466	185260	152366	183751	258319	193287	133113	246067	245494	244136	286867	333703
2008	277271	340674	176086	300447	268972	305638	246611	249296	170805	315958	266135	244981	267312	303374	321239	310466	295619	339738	333733	285721	171891	307660	251831	154871	257384	299813	264355	307147	268791	261911	274193	296886	209100	189424	191325	180703	241450	236350	183932	154690	185380	258078	195580	133294	249327	271386	246912	283035	329719
2009	279534	334668	174064	300628	262725	309500	256599	250262	174848	311251	262152	242567	267192	303948	311824	308082	303767	335544	338018	286535	174396	307539	261126	155384	251801	296856	255241	308897	269696	259557	276305	290036	210911	190933	189967	193709	242869	240605	188247	157376	184837	247757	185712	142287	254004	262544	239066	279383	313424
2010	286626	333854	179828	304672	264476	307479	262363	268670	179918	314268	262967	248451	276516	312307	313212	307992	305577	341489	336932	298727	175452	321994	259345	161570	246037	299693	251952	307056	268489	260945	283276	292480	218455	183298	195882	191597	241058	243532	189726	162989	187342	250654	185501	143102	243442	237316	245132	280047	333069
2011	288618	327788	181156	305577	263782	311402	261669	269425	184716	313544	257837	251892	285177	315234	319519	310617	308746	337445	331590	291062	177776	327697	271869	169115	255905	303646	259526	311643	276637	259496	295860	291424	214592	187915	198840	192261	244438	239941	195490	162053	187553	257384	188730	161932	246580	252978	242627	274072	321028
2012	293838	330987	178590	312247	267282	307237	261880	274917	186919	315657	261307	255090	282401	324499	315385	312035	306422	335725	329237	286294	177776	335906	272141	167757	238553	307720	264808	312156	276335	262695	300417	298606	216252	194585	196425	199081	246007	243050	195490	159337	189424	257263	193589	150103	252073	261186	244770	262122	313273
2013	295800	330745	181819	310345	264747	306573	263389	276516	187644	316713	264445	257505	286656	326279	320726	311462	306211	333522	327456	290941	175784	336238	277512	172796	252616	309742	271718	320515	281103	266286	283125	300538	221111	194434	199202	195731	252073	239549	198145	138998	189273	263631	194283	155897	254547	274193	234208	263963	328573
2014	295860	335091	185229	312337	260553	311915	259195	270783	194675	309983	277392	252012	276818	308384	327305	307479	304008	335664	322567	276396	169326	342605	288014	177383	249658	306634	296524	330202	274977	265592	286022	304219	207259	206746	199654	210156	262001	235294	196214	139571	199775	260492	205841	155927	254819	253461	237769	266105	324167
2015	301956	338712	186980	311402	259285	314087	257837	272955	196576	297158	278237	250896	272442	309893	328120	313393	301021	335604	322779	285177	164830	337324	284664	166821	248421	317980	292842	325404	274132	271326	278297	308806	207229	201887	207380	209190	243351	233966	194675	137640	215256	259526	211574	166851	263359	244649	238131	263842	320726
2016	303374	341126	190450	306603	258138	316713	260975	263932	201706	304129	281345	252133	273378	310708	326339	315898	304038	337716	319519	278961	164648	353922	278991	158070	232186	310195	291213	327124	278086	272805	277603	302982	210066	197814	208195	204815	259013	233755	195429	138907	216554	265743	214170	167063	271628	265140	238825	266950	336811
Energy use (MJ) per protein supply (g) per capita per year	China	United States	India	Russian Federation	Japan	Germany	Islamic Republic of Iran	Saudi Arabia	Indonesia	Canada	Mexico	South Africa	Brazil	Turkey	Australia	United Kingdom	Poland	France	Italy	Kazakhstan	Afghanistan	Albania	Algeria	Angola	Antigua and Barbuda	Argentina	Armenia	Austria	Azerbaijan	Barbados	Belarus	Belgium	Belize	Benin	Bolivia	Botswana	Bulgaria	Burkina Faso	Cameroon	Central African Republic	Chad	Chile	Colombia	Congo	Croatia	Cuba	Cyprus	Czechia	Denmark
2000	29110	39744.2	19686	29652.5	33533.4	32848.3	28609.3	29141.3	18309	36885.7	29941.1	26550.6	27618.2	36624.9	35226.9	34354.1	34708.8	40843.1	39619	30765.3	18281.1	31433	26383.7	13725.6	24648.4	36440.6	22718.4	36871.8	23358.3	28018.1	30167.2	33585.5	24794.5	19216.6	19529.6	22666.2	29833.3	23980.7	17870.8	16111.2	21991.6	27326.1	22040.3	15005.3	23191.3	24227.6	29603.8	31398.2	34726.2
2001	29002.2	39219.1	19522.6	30191.5	33616.8	34030.7	28751.8	28758.8	18229	36531	30487.1	26456.7	27729.5	35894.6	35046.1	35021.8	34642.7	41409.9	39525.1	30643.6	17272.7	32281.5	26898.3	13996.9	24025.9	35220	22690.6	37170.8	23977.3	29565.6	30761.8	35063.5	26056.8	18761	19314	23660.8	29336.1	23991.2	19185.3	16361.6	22537.6	27680.8	22165.5	15460.9	25156.1	25065.7	29649	32285	37424.7
2002	29283.9	39772	18896.7	30848.8	32824	34427.1	28320.6	28442.3	18528	36600.5	30567.1	26035.9	28282.4	35967.6	36447.5	35435.6	34980	41336.9	39337.3	30834.9	18552.4	34051.5	27788.6	14946.2	24032.9	31443.4	23055.7	36878.7	24648.4	29701.2	30014.2	34997.4	26981.8	20638.9	19693	23083.5	28470.2	24648.4	19049.7	16709.3	21685.6	28192	22054.2	15579.1	26491.5	24408.5	29471.7	32330.2	37320.4
2003	29489.1	39838.1	18889.7	31300.8	32820.5	34062	28584.9	28320.6	18590.6	36169.3	30382.8	26324.6	29356.9	35717.2	38127.1	35845.9	35133	40425.8	38840	31714.7	18966.2	33310.8	28571	15050.6	24408.5	32184.1	24394.6	35501.6	25420.4	29816	29690.8	34590.5	27350.4	19727.8	19908.6	21289.2	27315.6	26380.2	18976.6	16239.9	22141.1	29103.1	21942.9	16372	26307.2	26752.3	27868.6	32337.1	35943.3
2004	29875.1	40158	18778.4	31530.4	31916.4	33637.7	28946.6	28390.2	18795.8	36451	30365.4	27096.6	29127.4	35825	35296.5	35891.1	34461.9	39678.1	38933.9	31154.8	19209.6	33130	29016.1	14939.3	24286.8	31909.4	26102	34945.2	26164.6	29061.3	30327.1	34514	27034	20472	19345.2	21734.3	27865.1	26070.7	18382	16556.3	21824.7	29496	21494.3	16977.1	26164.6	26331.5	28014.6	33411.7	36708.3
2005	30233.3	40022.4	18660.2	32757.9	32128.5	33717.7	29346.5	29113.5	18646.3	35508.6	30275	27447.8	28890.9	35918.9	36482.3	36016.3	34326.3	38700.9	38725.3	31293.9	18608	34162.8	29249.1	15516.5	29002.2	33415.2	26905.3	35710.3	28484.1	31182.6	30984.4	34517.5	26564.5	20092.9	20159	20736.2	27061.8	25430.8	19856.4	16712.8	21869.9	29861.2	21643.9	13948.2	27169.6	27061.8	27308.7	34541.9	40210.2
2006	30292.4	39845	19442.6	33133.5	31353	34489.7	28873.6	29064.8	19122.7	36002.4	30608.8	27726	29346.5	35825	36374.5	36193.7	34329.7	38593.1	38558.4	32184.1	18590.6	33950.7	29117	15954.7	28435.4	34169.8	28129.4	35282.6	30149.8	30268	31641.6	34816.6	25458.7	20218.1	21087.5	19905.1	27732.9	26171.6	21327.4	17189.2	21786.4	30508	22196.8	15471.3	27990.3	27938.1	26529.7	33126.5	39271.2
2007	31005.3	39938.9	20165.9	34260.2	31523.4	35640.7	29353.4	29572.5	19508.7	36301.5	30827.9	28181.5	29652.5	35703.3	37671.6	36322.3	34632.3	38461	38506.2	32570.1	19473.9	33829	28936.2	16657.2	29103.1	34368	28591.9	36051.1	30518.4	31481.7	31996.3	35185.2	25267.4	20885.8	22005.5	19943.4	26474.1	26557.6	21348.3	17557.8	21174.4	29767.3	22273.3	15339.2	28355.4	28289.3	28132.9	33057	38454
2008	31951.1	39257.3	20291.1	34621.8	30994.8	35220	28418	28727.5	19682.6	36409.3	30667.9	28230.2	30803.6	34959.2	37017.8	35776.4	34065.4	39149.5	38457.5	32924.8	19807.8	35453	29019.6	17846.5	29659.5	34548.8	30462.8	35393.8	30974	30181.1	31596.4	34211.5	24095.5	21828.2	22047.3	20823.2	27823.4	27235.7	21195.3	17825.6	21362.2	29739.5	22537.6	15360.1	28731	31273	28452.8	32615.3	37995
2009	32211.9	38565.3	20058.1	34642.7	30275	35665.1	29569.1	28838.8	20148.5	35866.8	30208.9	27952	30789.7	35025.2	35932.9	35501.6	35004.4	38666.2	38951.3	33018.7	20096.4	35439	30090.7	17905.6	29016.1	34208	29412.6	35595.5	31078.3	29909.8	31839.9	33422.1	24304.1	22002	21890.8	22322	27986.8	27726	21692.6	18135.1	21299.6	28550.2	21400.4	16396.3	29270	30254.1	27548.6	32194.6	36117.2
2010	33029.2	38471.4	20722.3	35108.7	30476.7	35432.1	30233.3	30960	20732.8	36214.5	30302.8	28630.1	31864.2	35988.5	36092.8	35491.2	35213	39351.2	38826.1	34423.6	20218.1	37104.8	29885.5	18618.5	28351.9	34534.9	29033.5	35383.4	30939.2	30069.8	32643.2	33703.8	25173.5	21122.2	22572.4	22078.6	27778.1	28063.3	21862.9	18781.9	21588.2	28884	21376.1	16490.2	28052.9	27346.9	28247.6	32271.1	38381
2011	33258.7	37772.4	20875.3	35213	30396.7	35884.2	30153.3	31047	21285.7	36131.1	29711.6	29026.6	32862.2	36325.8	36819.6	35793.8	35578.1	38885.2	38210.6	33540.3	20485.9	37762	31328.7	19487.8	29489.1	34990.5	29906.4	35912	31878.1	29902.9	34093.3	33582.1	24728.4	21654.3	22913.1	22155.1	28167.6	27649.5	22527.1	18674.1	21612.6	29659.5	21748.2	18660.2	28414.5	29151.8	27959	31582.5	36993.5
2012	33860.3	38141.1	20579.8	35981.5	30800.1	35404.3	30177.6	31679.9	21539.5	36374.5	30111.5	29395.2	32542.3	37393.4	36343.2	35957.2	35310.4	38687	37939.4	32990.9	20485.9	38707.9	31360	19331.3	27489.5	35459.9	30514.9	35971.1	31843.3	30271.5	34618.4	34409.7	24919.7	22422.8	22634.9	22941	28348.5	28007.7	22527.1	18361.1	21828.2	29645.6	22308.1	17297	29047.4	30097.6	28205.9	30205.4	36099.8
2013	34086.3	38113.2	20951.8	35762.5	30508	35327.8	30351.5	31864.2	21623	36496.2	30473.2	29673.4	33032.6	37598.6	36958.7	35891.1	35286	38433.2	37734.2	33526.4	20256.3	38746.1	31979	19912.1	29110	35692.9	31311.3	36934.4	32392.8	30685.3	32625.8	34632.3	25479.5	22405.4	22954.9	22555	29047.4	27604.3	22833.2	16017.3	21810.8	30379.3	22388	17964.7	29332.6	31596.4	26988.8	30417.6	37862.9
2014	34093.3	38614	21344.8	35992	30024.6	35943.3	29868.1	31203.5	22433.3	35720.7	31965	29040.5	31899	35536.4	37716.8	35432.1	35032.2	38680.1	37170.8	31850.3	19512.2	39479.9	33189.1	20440.7	28769.2	35334.7	34169.8	38050.6	31686.8	30605.3	32959.6	35056.5	23883.4	23824.2	23007	24217.2	30191.5	27113.9	22610.6	16083.4	23020.9	30017.6	23719.9	17968.2	29363.9	29207.4	27399.1	30664.5	37355.1
2015	34795.7	39031.3	21546.5	35884.2	29878.6	36193.7	29711.6	31453.9	22652.3	34242.8	32062.4	28911.8	31394.7	35710.3	37810.7	36113.7	34687.9	38673.1	37195.2	32862.2	18994	38871.3	32803.1	19223.5	28626.7	36642.3	33745.5	37497.7	31589.5	31266.1	32069.4	35585.1	23879.9	23264.4	23897.3	24105.9	28042.4	26960.9	22433.3	15860.8	24804.9	29906.4	24380.6	19227	30348	28192	27440.8	30403.7	36958.7
2016	34959.2	39309.5	21946.4	35331.2	29746.4	36496.2	30073.3	30414.1	23243.5	35046.1	32420.6	29054.4	31502.5	35804.2	37605.5	36402.3	35035.7	38916.5	36819.6	32145.9	18973.2	40783.9	32149.3	18215.1	26755.8	35745.1	33557.7	37695.9	32045	31436.5	31989.4	34913.9	24206.8	22794.9	23991.2	23601.7	29847.3	26936.6	22520.2	16006.9	24954.4	30622.7	24679.7	19251.4	31300.8	30553.2	27520.8	30761.8	38812.2
[truncated: 88 more columns]

## Sheet: 2. Normalised values and RIW
Normalized (kgCO2eq) per protein supply (g) per capita per year	China	United States	India	Russian Federation	Japan	Germany	Islamic Republic of Iran	Saudi Arabia	Indonesia	Canada	Mexico	South Africa	Brazil	Turkey	Australia	United Kingdom	Poland	France	Italy	Kazakhstan	Afghanistan	Albania	Algeria	Angola	Antigua and Barbuda	Argentina	Armenia	Austria	Azerbaijan	Barbados	Belarus	Belgium	Belize	Benin	Bolivia	Botswana	Bulgaria	Burkina Faso	Cameroon	Central African Republic	Chad	Chile	Colombia	Congo	Croatia	Cuba	Cyprus	Czechia	Denmark
2000	1326.58	1811.19	897.115	1351.3	1528.15	1496.94	1303.76	1328	834.36	1680.92	1364.45	1209.94	1258.59	1669.04	1605.33	1565.55	1581.72	1861.26	1805.48	1402.01	833.092	1432.44	1202.33	625.493	1123.26	1660.64	1035.3	1680.29	1064.46	1276.82	1374.75	1530.53	1129.91	875.721	889.984	1032.93	1359.54	1092.83	814.392	734.205	1002.18	1245.28	1004.4	683.811	1056.86	1104.08	1349.08	1430.85	1582.51
2001	1321.66	1787.26	889.667	1375.86	1531.96	1550.82	1310.25	1310.57	830.715	1664.76	1389.33	1205.66	1263.66	1635.76	1597.09	1595.98	1578.71	1887.1	1801.2	1396.46	787.135	1471.1	1225.79	637.854	1094.89	1605.01	1034.04	1693.92	1092.67	1347.34	1401.85	1597.88	1187.44	854.961	880.159	1078.25	1336.88	1093.3	874.295	745.615	1027.06	1261.44	1010.11	704.571	1146.39	1142.27	1351.14	1471.26	1705.49
2002	1334.5	1812.45	861.142	1405.81	1495.83	1568.88	1290.6	1296.15	844.344	1667.93	1392.98	1186.49	1288.86	1639.09	1660.95	1614.84	1594.08	1883.77	1792.65	1405.18	845.453	1551.77	1266.36	681.117	1095.21	1432.91	1050.68	1680.61	1123.26	1353.52	1367.78	1594.87	1229.59	940.537	897.432	1051.94	1297.42	1123.26	868.115	761.462	988.237	1284.74	1005.04	709.959	1207.25	1112.32	1343.06	1473.32	1700.73
2003	1343.85	1815.47	860.825	1426.41	1495.67	1552.24	1302.65	1290.6	847.196	1648.28	1384.58	1199.64	1337.83	1627.68	1737.5	1633.54	1601.05	1842.25	1769.98	1445.27	864.311	1518.01	1302.01	685.871	1112.32	1466.67	1111.69	1617.85	1158.44	1358.75	1353.04	1576.33	1246.39	899.017	907.258	970.171	1244.8	1202.18	864.787	740.069	1009	1326.26	999.964	746.091	1198.85	1219.13	1270	1473.64	1637.98
2004	1361.44	1830.05	855.754	1436.87	1454.46	1532.91	1319.13	1293.77	856.546	1661.11	1383.79	1234.82	1327.37	1632.59	1608.5	1635.6	1570.47	1808.18	1774.26	1419.76	875.404	1509.77	1322.3	680.8	1106.77	1454.15	1189.5	1592.49	1192.35	1324.36	1382.04	1572.84	1231.97	932.93	881.585	990.456	1269.84	1188.07	837.688	754.49	994.576	1344.17	979.521	773.665	1192.35	1199.96	1276.66	1522.61	1672.84
2005	1377.76	1823.86	850.366	1492.81	1464.13	1536.55	1337.35	1326.74	849.732	1618.17	1379.67	1250.83	1316.59	1636.87	1662.54	1641.3	1564.29	1763.65	1764.75	1426.1	847.989	1556.84	1332.92	707.106	1321.66	1522.77	1226.11	1627.36	1298.05	1421.03	1411.99	1573	1210.57	915.657	918.668	944.974	1233.24	1158.91	904.88	761.621	996.636	1360.81	986.336	635.635	1238.15	1233.24	1244.49	1574.11	1832.42
2006	1380.46	1815.78	886.022	1509.93	1428.79	1571.73	1315.8	1324.52	871.443	1640.67	1394.88	1263.5	1337.35	1632.59	1657.63	1649.39	1564.44	1758.73	1757.15	1466.67	847.196	1547.17	1326.89	727.074	1295.83	1557.15	1281.89	1607.87	1373.96	1379.35	1441.95	1586.63	1160.18	921.362	960.98	907.099	1263.82	1192.67	971.914	783.332	992.833	1390.28	1011.53	705.046	1275.55	1273.17	1208.99	1509.61	1789.63
2007	1412.94	1820.06	918.985	1561.28	1436.56	1624.19	1337.67	1347.65	889.033	1654.3	1404.86	1284.26	1351.3	1627.04	1716.74	1655.25	1578.23	1752.71	1754.77	1484.26	887.448	1541.62	1318.65	759.085	1326.26	1566.19	1302.96	1642.89	1390.76	1434.66	1458.11	1603.43	1151.46	951.788	1002.82	908.842	1206.45	1210.26	972.865	800.13	964.942	1356.53	1015.02	699.024	1292.19	1289.18	1282.05	1506.44	1752.39
2008	1456.05	1789	924.69	1577.76	1412.47	1605.01	1295.04	1309.14	896.957	1659.21	1397.57	1286.48	1403.75	1593.13	1686.94	1630.37	1552.4	1784.09	1752.55	1500.42	902.662	1615.63	1322.46	813.283	1351.62	1574.43	1388.22	1612.94	1411.52	1375.39	1439.89	1559.06	1098.06	994.735	1004.72	948.936	1267.94	1241.16	965.892	812.332	973.499	1355.26	1027.06	699.975	1309.3	1425.15	1296.63	1486.32	1731.48
2009	1467.93	1757.46	914.072	1578.71	1379.67	1625.3	1347.5	1314.22	918.192	1634.49	1376.65	1273.81	1403.12	1596.14	1637.5	1617.85	1595.19	1762.06	1775.06	1504.7	915.815	1615	1371.27	815.977	1322.3	1558.9	1340.36	1622.13	1416.27	1363.03	1450.98	1523.08	1107.57	1002.66	997.587	1017.24	1275.39	1263.5	988.554	826.436	970.647	1301.06	975.242	747.2	1333.87	1378.71	1255.42	1467.14	1645.9
2010	1505.18	1753.19	944.34	1599.94	1388.86	1614.68	1377.76	1410.88	944.816	1650.34	1380.93	1304.71	1452.09	1640.04	1644.79	1617.37	1604.7	1793.28	1769.35	1568.72	921.362	1690.91	1361.92	848.464	1292.03	1573.79	1323.09	1612.46	1409.93	1370.32	1487.59	1535.92	1147.19	962.565	1028.65	1006.14	1265.88	1278.88	996.319	855.912	983.8	1316.28	974.133	751.479	1278.4	1246.23	1287.28	1470.63	1749.07
2011	1515.64	1721.33	951.313	1604.7	1385.21	1635.28	1374.12	1414.85	970.013	1646.53	1353.99	1322.77	1497.57	1655.41	1677.91	1631.16	1621.34	1772.04	1741.3	1528.47	933.564	1720.86	1427.68	888.082	1343.85	1594.55	1362.87	1636.55	1452.72	1362.71	1553.67	1530.37	1126.9	986.811	1044.18	1009.63	1283.63	1260.02	1026.59	851	984.909	1351.62	991.09	850.366	1294.88	1328.48	1274.12	1439.25	1685.84
2012	1543.05	1738.13	937.843	1639.72	1403.59	1613.41	1375.23	1443.69	981.581	1657.63	1372.22	1339.57	1482.99	1704.06	1656.2	1638.61	1609.13	1763.01	1728.94	1503.43	933.564	1763.96	1429.11	880.951	1252.73	1615.95	1390.6	1639.24	1451.14	1379.51	1577.6	1568.09	1135.62	1021.83	1031.5	1045.45	1291.87	1276.34	1026.59	836.737	994.735	1350.98	1016.6	788.244	1323.72	1371.58	1285.37	1376.5	1645.11
2013	1553.35	1736.86	954.799	1629.74	1390.28	1609.93	1383.15	1452.09	985.385	1663.17	1388.7	1352.25	1505.33	1713.41	1684.25	1635.6	1608.02	1751.44	1719.59	1527.84	923.105	1765.71	1457.32	907.416	1326.58	1626.57	1426.89	1683.14	1476.18	1398.37	1486.79	1578.23	1161.13	1021.04	1046.08	1027.86	1323.72	1257.96	1040.53	729.926	993.942	1384.42	1020.25	818.671	1336.72	1439.89	1229.91	1386.16	1725.45
2014	1553.67	1759.68	972.707	1640.19	1368.26	1637.98	1361.12	1421.98	1022.31	1627.83	1456.68	1323.41	1453.67	1619.43	1718.8	1614.68	1596.46	1762.69	1693.92	1451.45	889.192	1799.14	1512.47	931.504	1311.05	1610.24	1557.15	1734.01	1444.01	1394.72	1502.01	1597.57	1088.39	1085.7	1048.46	1103.61	1375.86	1235.61	1030.39	732.937	1049.09	1367.94	1080.94	818.83	1338.15	1331.01	1248.61	1397.41	1702.32
2015	1585.68	1778.7	981.898	1635.28	1361.6	1649.39	1353.99	1433.39	1032.29	1560.48	1461.12	1317.54	1430.69	1627.36	1723.08	1645.74	1580.77	1762.38	1695.03	1497.57	865.579	1771.41	1494.88	876.038	1304.55	1669.83	1537.82	1708.81	1439.57	1424.83	1461.44	1621.65	1088.23	1060.18	1089.03	1098.53	1277.93	1228.64	1022.31	722.795	1130.39	1362.87	1111.05	876.197	1382.99	1284.74	1250.51	1385.53	1684.25
2016	1593.13	1791.38	1000.12	1610.08	1355.58	1663.17	1370.47	1386	1059.23	1597.09	1477.44	1324.04	1435.61	1631.64	1713.73	1658.89	1596.61	1773.47	1677.91	1464.92	864.628	1858.57	1465.08	830.081	1219.29	1628.94	1529.26	1717.85	1460.33	1432.6	1457.79	1591.07	1103.13	1038.79	1093.3	1075.56	1360.17	1227.53	1026.27	729.451	1137.2	1395.51	1124.68	877.306	1426.41	1392.34	1254.15	1401.85	1768.72
Normalized Water Use (WU) per protein supply (g) per capita per year	China	United States	India	Russian Federation	Japan	Germany	Islamic Republic of Iran	Saudi Arabia	Indonesia	Canada	Mexico	South Africa	Brazil	Turkey	Australia	United Kingdom	Poland	France	Italy	Kazakhstan	Afghanistan	Albania	Algeria	Angola	Antigua and Barbuda	Argentina	Armenia	Austria	Azerbaijan	Barbados	Belarus	Belgium	Belize	Benin	Bolivia	Botswana	Bulgaria	Burkina Faso	Cameroon	Central African Republic	Chad	Chile	Colombia	Congo	Croatia	Cuba	Cyprus	Czechia	Denmark
2000	252616	344899	170835	257324	291002	285057	248270	252887	158885	320093	259828	230405	239670	317829	305698	298124	301202	354435	343812	266980	158643	272774	228957	119111	213898	316230	197150	319972	202702	243140	261790	291454	215166	166761	169477	196697	258893	208104	155082	139812	190843	237135	191265	130216	201254	210247	256901	272473	301353
2001	251680	340342	169416	262001	291726	295317	249508	249568	158190	317015	264566	229590	240635	311492	304129	303918	300628	359354	342997	265924	149892	280138	233423	121464	208496	305638	196908	322567	208074	256569	266950	304280	226120	162808	167606	205328	254577	208195	166489	141985	195580	240213	192351	134169	218304	217519	257293	280168	324770
2002	254125	345140	163985	267705	284845	298757	245766	246822	160786	317618	265260	225939	245434	312126	316290	307509	303555	358720	341368	267584	160997	295498	241148	129703	208557	272865	200077	320032	213898	257746	260462	303706	234147	179103	170895	200318	247063	213898	165312	145003	188187	244649	191386	135195	229892	211816	255754	280560	323865
2003	255905	345713	163924	271628	284815	295589	248059	245766	161329	313876	263661	228444	254758	309953	330866	311070	304883	350813	337052	275219	164588	289070	247938	130608	211816	279293	211695	308082	220598	258742	257655	300176	237346	171197	172766	184747	237044	228927	164679	140929	192140	252555	190420	142076	228293	232156	241842	280621	311915
2004	259255	348490	162958	273619	276969	291907	251198	246369	163109	316321	263510	235143	252767	310889	306302	311462	299059	344325	337867	270360	166701	287501	251801	129643	210760	276909	226512	303254	227056	252193	263178	299512	234600	177655	167877	188609	241812	226241	159518	143675	189394	255966	186527	147327	227056	228504	243110	289945	318554
2005	262363	347313	161932	284272	278810	292601	254668	252646	161812	308142	262725	238191	250715	311703	316592	312548	297882	335845	336057	271567	161480	296464	253823	134652	251680	289976	233483	309893	247184	270602	268882	299542	230526	174366	174939	179948	234841	220688	172314	145033	189786	259134	187825	121042	235777	234841	236984	299753	348942
2006	262876	345774	168722	287531	272080	299300	250564	252224	165946	312428	265622	240605	254668	310889	315657	314087	297912	334910	334608	279293	161329	294623	252676	138454	246761	296524	244106	306181	261639	262665	274585	302137	220929	175452	182996	172736	240666	227116	185079	149167	189062	264747	192623	134260	242899	242446	230224	287471	340795
2007	269063	346589	174999	297309	273559	309289	254728	256629	169296	315023	267524	244558	257324	309832	326913	315204	300538	333763	334155	282642	168994	293567	251107	144550	252555	298244	248119	312850	264838	273197	277663	305336	219270	181246	190963	173068	229741	230466	185260	152366	183751	258319	193287	133113	246067	245494	244136	286867	333703
2008	277271	340674	176086	300447	268972	305638	246611	249296	170805	315958	266135	244981	267312	303374	321239	310466	295619	339738	333733	285721	171891	307660	251831	154871	257384	299813	264355	307147	268791	261911	274193	296886	209100	189424	191325	180703	241450	236350	183932	154690	185380	258078	195580	133294	249327	271386	246912	283035	329719
2009	279534	334668	174064	300628	262725	309500	256599	250262	174848	311251	262152	242567	267192	303948	311824	308082	303767	335544	338018	286535	174396	307539	261126	155384	251801	296856	255241	308897	269696	259557	276305	290036	210911	190933	189967	193709	242869	240605	188247	157376	184837	247757	185712	142287	254004	262544	239066	279383	313424
2010	286626	333854	179828	304672	264476	307479	262363	268670	179918	314268	262967	248451	276516	312307	313212	307992	305577	341489	336932	298727	175452	321994	259345	161570	246037	299693	251952	307056	268489	260945	283276	292480	218455	183298	195882	191597	241058	243532	189726	162989	187342	250654	185501	143102	243442	237316	245132	280047	333069
2011	288618	327788	181156	305577	263782	311402	261669	269425	184716	313544	257837	251892	285177	315234	319519	310617	308746	337445	331590	291062	177776	327697	271869	169115	255905	303646	259526	311643	276637	259496	295860	291424	214592	187915	198840	192261	244438	239941	195490	162053	187553	257384	188730	161932	246580	252978	242627	274072	321028
2012	293838	330987	178590	312247	267282	307237	261880	274917	186919	315657	261307	255090	282401	324499	315385	312035	306422	335725	329237	286294	177776	335906	272141	167757	238553	307720	264808	312156	276335	262695	300417	298606	216252	194585	196425	199081	246007	243050	195490	159337	189424	257263	193589	150103	252073	261186	244770	262122	313273
2013	295800	330745	181819	310345	264747	306573	263389	276516	187644	316713	264445	257505	286656	326279	320726	311462	306211	333522	327456	290941	175784	336238	277512	172796	252616	309742	271718	320515	281103	266286	283125	300538	221111	194434	199202	195731	252073	239549	198145	138998	189273	263631	194283	155897	254547	274193	234208	263963	328573
2014	295860	335091	185229	312337	260553	311915	259195	270783	194675	309983	277392	252012	276818	308384	327305	307479	304008	335664	322567	276396	169326	342605	288014	177383	249658	306634	296524	330202	274977	265592	286022	304219	207259	206746	199654	210156	262001	235294	196214	139571	199775	260492	205841	155927	254819	253461	237769	266105	324167
2015	301956	338712	186980	311402	259285	314087	257837	272955	196576	297158	278237	250896	272442	309893	328120	313393	301021	335604	322779	285177	164830	337324	284664	166821	248421	317980	292842	325404	274132	271326	278297	308806	207229	201887	207380	209190	243351	233966	194675	137640	215256	259526	211574	166851	263359	244649	238131	263842	320726
2016	303374	341126	190450	306603	258138	316713	260975	263932	201706	304129	281345	252133	273378	310708	326339	315898	304038	337716	319519	278961	164648	353922	278991	158070	232186	310195	291213	327124	278086	272805	277603	302982	210066	197814	208195	204815	259013	233755	195429	138907	216554	265743	214170	167063	271628	265140	238825	266950	336811
Normalized Energy use (MJ) per protein supply (g) per capita per year	China	United States	India	Russian Federation	Japan	Germany	Islamic Republic of Iran	Saudi Arabia	Indonesia	Canada	Mexico	South Africa	Brazil	Turkey	Australia	United Kingdom	Poland	France	Italy	Kazakhstan	Afghanistan	Albania	Algeria	Angola	Antigua and Barbuda	Argentina	Armenia	Austria	Azerbaijan	Barbados	Belarus	Belgium	Belize	Benin	Bolivia	Botswana	Bulgaria	Burkina Faso	Cameroon	Central African Republic	Chad	Chile	Colombia	Congo	Croatia	Cuba	Cyprus	Czechia	Denmark
2000	29110	39744.2	19686	29652.5	33533.4	32848.3	28609.3	29141.3	18309	36885.7	29941.1	26550.6	27618.2	36624.9	35226.9	34354.1	34708.8	40843.1	39619	30765.3	18281.1	31433	26383.7	13725.6	24648.4	36440.6	22718.4	36871.8	23358.3	28018.1	30167.2	33585.5	24794.5	19216.6	19529.6	22666.2	29833.3	23980.7	17870.8	16111.2	21991.6	27326.1	22040.3	15005.3	23191.3	24227.6	29603.8	31398.2	34726.2
2001	29002.2	39219.1	19522.6	30191.5	33616.8	34030.7	28751.8	28758.8	18229	36531	30487.1	26456.7	27729.5	35894.6	35046.1	35021.8	34642.7	41409.9	39525.1	30643.6	17272.7	32281.5	26898.3	13996.9	24025.9	35220	22690.6	37170.8	23977.3	29565.6	30761.8	35063.5	26056.8	18761	19314	23660.8	29336.1	23991.2	19185.3	16361.6	22537.6	27680.8	22165.5	15460.9	25156.1	25065.7	29649	32285	37424.7
2002	29283.9	39772	18896.7	30848.8	32824	34427.1	28320.6	28442.3	18528	36600.5	30567.1	26035.9	28282.4	35967.6	36447.5	35435.6	34980	41336.9	39337.3	30834.9	18552.4	34051.5	27788.6	14946.2	24032.9	31443.4	23055.7	36878.7	24648.4	29701.2	30014.2	34997.4	26981.8	20638.9	19693	23083.5	28470.2	24648.4	19049.7	16709.3	21685.6	28192	22054.2	15579.1	26491.5	24408.5	29471.7	32330.2	37320.4
2003	29489.1	39838.1	18889.7	31300.8	32820.5	34062	28584.9	28320.6	18590.6	36169.3	30382.8	26324.6	29356.9	35717.2	38127.1	35845.9	35133	40425.8	38840	31714.7	18966.2	33310.8	28571	15050.6	24408.5	32184.1	24394.6	35501.6	25420.4	29816	29690.8	34590.5	27350.4	19727.8	19908.6	21289.2	27315.6	26380.2	18976.6	16239.9	22141.1	29103.1	21942.9	16372	26307.2	26752.3	27868.6	32337.1	35943.3
2004	29875.1	40158	18778.4	31530.4	31916.4	33637.7	28946.6	28390.2	18795.8	36451	30365.4	27096.6	29127.4	35825	35296.5	35891.1	34461.9	39678.1	38933.9	31154.8	19209.6	33130	29016.1	14939.3	24286.8	31909.4	26102	34945.2	26164.6	29061.3	30327.1	34514	27034	20472	19345.2	21734.3	27865.1	26070.7	18382	16556.3	21824.7	29496	21494.3	16977.1	26164.6	26331.5	28014.6	33411.7	36708.3
2005	30233.3	40022.4	18660.2	32757.9	32128.5	33717.7	29346.5	29113.5	18646.3	35508.6	30275	27447.8	28890.9	35918.9	36482.3	36016.3	34326.3	38700.9	38725.3	31293.9	18608	34162.8	29249.1	15516.5	29002.2	33415.2	26905.3	35710.3	28484.1	31182.6	30984.4	34517.5	26564.5	20092.9	20159	20736.2	27061.8	25430.8	19856.4	16712.8	21869.9	29861.2	21643.9	13948.2	27169.6	27061.8	27308.7	34541.9	40210.2
2006	30292.4	39845	19442.6	33133.5	31353	34489.7	28873.6	29064.8	19122.7	36002.4	30608.8	27726	29346.5	35825	36374.5	36193.7	34329.7	38593.1	38558.4	32184.1	18590.6	33950.7	29117	15954.7	28435.4	34169.8	28129.4	35282.6	30149.8	30268	31641.6	34816.6	25458.7	20218.1	21087.5	19905.1	27732.9	26171.6	21327.4	17189.2	21786.4	30508	22196.8	15471.3	27990.3	27938.1	26529.7	33126.5	39271.2
2007	31005.3	39938.9	20165.9	34260.2	31523.4	35640.7	29353.4	29572.5	19508.7	36301.5	30827.9	28181.5	29652.5	35703.3	37671.6	36322.3	34632.3	38461	38506.2	32570.1	19473.9	33829	28936.2	16657.2	29103.1	34368	28591.9	36051.1	30518.4	31481.7	31996.3	35185.2	25267.4	20885.8	22005.5	19943.4	26474.1	26557.6	21348.3	17557.8	21174.4	29767.3	22273.3	15339.2	28355.4	28289.3	28132.9	33057	38454
2008	31951.1	39257.3	20291.1	34621.8	30994.8	35220	28418	28727.5	19682.6	36409.3	30667.9	28230.2	30803.6	34959.2	37017.8	35776.4	34065.4	39149.5	38457.5	32924.8	19807.8	35453	29019.6	17846.5	29659.5	34548.8	30462.8	35393.8	30974	30181.1	31596.4	34211.5	24095.5	21828.2	22047.3	20823.2	27823.4	27235.7	21195.3	17825.6	21362.2	29739.5	22537.6	15360.1	28731	31273	28452.8	32615.3	37995
2009	32211.9	38565.3	20058.1	34642.7	30275	35665.1	29569.1	28838.8	20148.5	35866.8	30208.9	27952	30789.7	35025.2	35932.9	35501.6	35004.4	38666.2	38951.3	33018.7	20096.4	35439	30090.7	17905.6	29016.1	34208	29412.6	35595.5	31078.3	29909.8	31839.9	33422.1	24304.1	22002	21890.8	22322	27986.8	27726	21692.6	18135.1	21299.6	28550.2	21400.4	16396.3	29270	30254.1	27548.6	32194.6	36117.2
2010	33029.2	38471.4	20722.3	35108.7	30476.7	35432.1	30233.3	30960	20732.8	36214.5	30302.8	28630.1	31864.2	35988.5	36092.8	35491.2	35213	39351.2	38826.1	34423.6	20218.1	37104.8	29885.5	18618.5	28351.9	34534.9	29033.5	35383.4	30939.2	30069.8	32643.2	33703.8	25173.5	21122.2	22572.4	22078.6	27778.1	28063.3	21862.9	18781.9	21588.2	28884	21376.1	16490.2	28052.9	27346.9	28247.6	32271.1	38381
2011	33258.7	37772.4	20875.3	35213	30396.7	35884.2	30153.3	31047	21285.7	36131.1	29711.6	29026.6	32862.2	36325.8	36819.6	35793.8	35578.1	38885.2	38210.6	33540.3	20485.9	37762	31328.7	19487.8	29489.1	34990.5	29906.4	35912	31878.1	29902.9	34093.3	33582.1	24728.4	21654.3	22913.1	22155.1	28167.6	27649.5	22527.1	18674.1	21612.6	29659.5	21748.2	18660.2	28414.5	29151.8	27959	31582.5	36993.5
2012	33860.3	38141.1	20579.8	35981.5	30800.1	35404.3	30177.6	31679.9	21539.5	36374.5	30111.5	29395.2	32542.3	37393.4	36343.2	35957.2	35310.4	38687	37939.4	32990.9	20485.9	38707.9	31360	19331.3	27489.5	35459.9	30514.9	35971.1	31843.3	30271.5	34618.4	34409.7	24919.7	22422.8	22634.9	22941	28348.5	28007.7	22527.1	18361.1	21828.2	29645.6	22308.1	17297	29047.4	30097.6	28205.9	30205.4	36099.8
2013	34086.3	38113.2	20951.8	35762.5	30508	35327.8	30351.5	31864.2	21623	36496.2	30473.2	29673.4	33032.6	37598.6	36958.7	35891.1	35286	38433.2	37734.2	33526.4	20256.3	38746.1	31979	19912.1	29110	35692.9	31311.3	36934.4	32392.8	30685.3	32625.8	34632.3	25479.5	22405.4	22954.9	22555	29047.4	27604.3	22833.2	16017.3	21810.8	30379.3	22388	17964.7	29332.6	31596.4	26988.8	30417.6	37862.9
2014	34093.3	38614	21344.8	35992	30024.6	35943.3	29868.1	31203.5	22433.3	35720.7	31965	29040.5	31899	35536.4	37716.8	35432.1	35032.2	38680.1	37170.8	31850.3	19512.2	39479.9	33189.1	20440.7	28769.2	35334.7	34169.8	38050.6	31686.8	30605.3	32959.6	35056.5	23883.4	23824.2	23007	24217.2	30191.5	27113.9	22610.6	16083.4	23020.9	30017.6	23719.9	17968.2	29363.9	29207.4	27399.1	30664.5	37355.1
2015	34795.7	39031.3	21546.5	35884.2	29878.6	36193.7	29711.6	31453.9	22652.3	34242.8	32062.4	28911.8	31394.7	35710.3	37810.7	36113.7	34687.9	38673.1	37195.2	32862.2	18994	38871.3	32803.1	19223.5	28626.7	36642.3	33745.5	37497.7	31589.5	31266.1	32069.4	35585.1	23879.9	23264.4	23897.3	24105.9	28042.4	26960.9	22433.3	15860.8	24804.9	29906.4	24380.6	19227	30348	28192	27440.8	30403.7	36958.7
2016	34959.2	39309.5	21946.4	35331.2	29746.4	36496.2	30073.3	30414.1	23243.5	35046.1	32420.6	29054.4	31502.5	35804.2	37605.5	36402.3	35035.7	38916.5	36819.6	32145.9	18973.2	40783.9	32149.3	18215.1	26755.8	35745.1	33557.7	37695.9	32045	31436.5	31989.4	34913.9	24206.8	22794.9	23991.2	23601.7	29847.3	26936.6	22520.2	16006.9	24954.4	30622.7	24679.7	19251.4	31300.8	30553.2	27520.8	30761.8	38812.2
Normalized Land Use (m2) per protein supply (g) per capita per year	China	United States	India	Russian Federation	Japan	Germany	Islamic Republic of Iran	Saudi Arabia	Indonesia	Canada	Mexico	South Africa	Brazil	Turkey	Australia	United Kingdom	Poland	France	Italy	Kazakhstan	Afghanistan	Albania	Algeria	Angola	Antigua and Barbuda	Argentina	Armenia	Austria	Azerbaijan	Barbados	Belarus	Belgium	Belize	Benin	Bolivia	Botswana	Bulgaria	Burkina Faso	Cameroon	Central African Republic	Chad	Chile	Colombia	Congo	Croatia	Cuba	Cyprus	Czechia	Denmark
2000	1275.52	1741.48	862.586	1299.29	1469.34	1439.32	1253.58	1276.89	802.246	1616.23	1311.94	1163.37	1210.15	1604.8	1543.54	1505.3	1520.84	1789.63	1735.99	1348.05	801.027	1377.3	1156.06	601.418	1080.02	1596.72	995.456	1615.62	1023.49	1227.67	1321.84	1471.62	1086.42	842.016	855.729	993.17	1307.21	1050.77	783.047	705.946	963.61	1197.35	965.743	657.491	1016.18	1061.59	1297.16	1375.78	1521.6
2001	1270.79	1718.47	855.424	1322.91	1472.99	1491.13	1259.82	1260.13	798.742	1600.68	1335.86	1159.26	1215.03	1572.8	1535.62	1534.55	1517.94	1814.46	1731.88	1342.71	756.839	1414.48	1178.61	613.303	1052.75	1543.24	994.237	1628.72	1050.61	1295.48	1347.9	1536.38	1141.73	822.055	846.282	1036.75	1285.42	1051.22	840.644	716.917	987.532	1212.89	971.228	677.452	1102.27	1098.31	1299.14	1414.64	1639.84
2002	1283.14	1742.7	827.997	1351.7	1438.25	1508.5	1240.93	1246.26	811.846	1603.73	1339.36	1140.82	1239.25	1576	1597.03	1552.69	1532.72	1811.26	1723.65	1351.1	812.912	1492.04	1217.62	654.901	1053.05	1377.76	1010.24	1615.92	1080.02	1301.42	1315.14	1533.49	1182.27	904.336	862.891	1011.45	1247.48	1080.02	834.702	732.154	950.201	1235.29	966.352	682.633	1160.78	1069.51	1291.36	1416.62	1635.27
2003	1292.13	1745.59	827.693	1371.51	1438.1	1492.5	1252.51	1240.93	814.588	1584.84	1331.29	1153.47	1286.34	1565.03	1670.62	1570.67	1539.43	1771.34	1701.86	1389.65	831.045	1459.59	1251.9	659.472	1069.51	1410.22	1068.9	1555.58	1113.85	1306.45	1300.96	1515.66	1198.42	864.415	872.338	932.83	1196.89	1155.9	831.502	711.584	970.162	1275.21	961.476	717.374	1152.71	1172.21	1221.12	1416.92	1574.93
2004	1309.04	1759.61	822.817	1381.57	1398.48	1473.91	1268.36	1243.98	823.578	1597.18	1330.52	1187.29	1276.28	1569.75	1546.59	1572.65	1510.02	1738.58	1705.97	1365.11	841.711	1451.66	1271.4	654.596	1064.18	1398.18	1143.72	1531.2	1146.46	1273.38	1328.85	1512.31	1184.55	897.022	847.653	952.334	1220.97	1142.34	805.446	725.45	956.296	1292.43	941.82	743.887	1146.46	1153.77	1227.52	1464	1608.45
2005	1324.73	1753.67	817.636	1435.36	1407.78	1477.41	1285.88	1275.67	817.026	1555.89	1326.56	1202.68	1265.92	1573.87	1598.55	1578.13	1504.08	1695.76	1696.83	1371.21	815.35	1496.92	1281.61	679.89	1270.79	1464.16	1178.91	1564.72	1248.09	1366.33	1357.65	1512.46	1163.98	880.414	883.309	908.603	1185.77	1114.31	870.052	732.307	958.277	1308.43	948.372	611.17	1190.49	1185.77	1196.59	1513.53	1761.89
2006	1327.33	1745.89	851.92	1451.81	1373.8	1511.24	1265.16	1273.54	837.902	1577.52	1341.19	1214.87	1285.88	1569.75	1593.83	1585.9	1504.23	1691.04	1689.52	1410.22	814.588	1487.62	1275.82	699.089	1245.96	1497.22	1232.55	1545.98	1321.08	1326.26	1386.45	1525.56	1115.53	885.899	923.993	872.186	1215.18	1146.76	934.506	753.182	954.62	1336.77	972.6	677.909	1226.45	1224.17	1162.46	1451.51	1720.75
2007	1358.56	1750.01	883.614	1501.18	1381.27	1561.68	1286.18	1295.78	854.815	1590.63	1350.79	1234.83	1299.29	1564.42	1650.66	1591.54	1517.49	1685.25	1687.23	1427.13	853.291	1482.29	1267.9	729.869	1275.21	1505.91	1252.81	1579.66	1337.23	1379.44	1401.99	1541.71	1107.15	915.155	964.219	873.862	1160.02	1163.68	935.421	769.334	927.802	1304.32	975.952	672.119	1242.45	1239.56	1232.7	1448.46	1684.95
2008	1400.01	1720.14	889.099	1517.03	1358.1	1543.24	1245.2	1258.76	862.434	1595.35	1343.78	1236.97	1349.72	1531.81	1622.02	1567.62	1492.65	1715.42	1685.1	1442.67	867.919	1553.45	1271.56	781.981	1299.59	1513.83	1334.79	1550.86	1357.19	1322.45	1384.47	1499.05	1055.8	956.448	966.048	912.412	1219.14	1193.39	928.716	781.066	936.03	1303.1	987.532	673.033	1258.91	1370.29	1246.72	1429.11	1664.83
2009	1411.44	1689.82	878.89	1517.94	1326.56	1562.74	1295.63	1263.63	882.852	1571.58	1323.67	1224.78	1349.11	1534.71	1574.47	1555.58	1533.79	1694.24	1706.73	1446.79	880.566	1552.84	1318.49	784.571	1271.4	1498.9	1288.77	1559.69	1361.76	1310.56	1395.13	1464.46	1064.94	964.067	959.191	978.085	1226.3	1214.87	950.506	794.627	933.287	1250.99	937.706	718.441	1282.53	1325.65	1207.1	1410.67	1582.55
2010	1447.24	1685.71	907.993	1538.36	1335.4	1552.53	1324.73	1356.58	908.45	1586.82	1327.78	1254.49	1396.2	1576.91	1581.48	1555.12	1542.93	1724.26	1701.25	1508.34	885.899	1625.82	1309.5	815.807	1242.3	1513.22	1272.17	1550.4	1355.67	1317.57	1430.33	1476.8	1103.03	925.516	989.056	967.419	1217.16	1229.65	957.972	822.969	945.934	1265.61	936.64	722.555	1229.2	1198.26	1237.73	1414.03	1681.75
2011	1457.3	1655.08	914.698	1542.93	1331.9	1572.34	1321.23	1360.39	932.678	1583.16	1301.88	1271.86	1439.93	1591.69	1613.33	1568.38	1558.93	1703.84	1674.28	1469.64	897.632	1654.62	1372.73	853.901	1292.13	1533.18	1310.41	1573.56	1396.81	1310.26	1493.87	1471.47	1083.53	948.829	1003.99	970.771	1234.22	1211.52	987.075	818.245	947.001	1299.59	952.944	817.636	1245.04	1277.35	1225.08	1383.86	1620.95
2012	1483.66	1671.23	901.746	1576.61	1349.57	1551.31	1322.3	1388.12	943.801	1593.83	1319.4	1288.01	1425.91	1638.47	1592.45	1575.54	1547.2	1695.15	1662.39	1445.57	897.632	1696.07	1374.1	847.044	1204.51	1553.75	1337.08	1576.15	1395.28	1326.41	1516.88	1507.74	1091.91	982.504	991.799	1005.21	1242.15	1227.22	987.075	804.532	956.448	1298.98	977.476	757.905	1272.78	1318.79	1235.9	1323.52	1581.79
2013	1493.56	1670.01	918.05	1567.01	1336.77	1547.96	1329.92	1396.2	947.458	1599.16	1335.25	1300.2	1447.4	1647.46	1619.42	1572.65	1546.13	1684.03	1653.4	1469.03	887.575	1697.74	1401.23	872.49	1275.52	1563.96	1371.97	1618.36	1419.36	1344.54	1429.57	1517.49	1116.44	981.742	1005.82	988.294	1272.78	1209.54	1000.48	701.832	955.686	1331.13	980.98	787.161	1285.27	1384.47	1182.57	1332.81	1659.04
2014	1493.87	1691.95	935.268	1577.07	1315.59	1574.93	1308.74	1367.25	982.961	1565.18	1400.62	1272.47	1397.72	1557.1	1652.64	1552.53	1535.01	1694.85	1628.72	1395.59	854.967	1729.9	1454.25	895.651	1260.59	1548.27	1497.22	1667.27	1388.43	1341.04	1444.2	1536.08	1046.5	1043.91	1008.1	1061.13	1322.91	1188.06	990.732	704.727	1008.71	1315.29	1039.34	787.314	1286.64	1279.78	1200.55	1343.63	1636.8
2015	1524.65	1710.24	944.106	1572.34	1309.19	1585.9	1301.88	1378.22	992.561	1500.42	1404.88	1266.83	1375.63	1564.72	1656.76	1582.4	1519.93	1694.55	1629.79	1439.93	832.264	1703.23	1437.34	842.32	1254.34	1605.56	1478.63	1643.04	1384.16	1369.99	1405.19	1559.24	1046.35	1019.38	1047.11	1056.25	1228.74	1181.35	982.961	694.975	1086.88	1310.41	1068.29	842.473	1329.76	1235.29	1202.38	1332.2	1619.42
2016	1531.81	1722.43	961.629	1548.11	1303.4	1599.16	1317.73	1332.66	1018.46	1535.62	1420.58	1273.08	1380.35	1568.84	1647.77	1595.05	1535.16	1705.21	1613.33	1408.54	831.349	1787.04	1408.69	798.132	1172.36	1566.25	1470.4	1651.73	1404.12	1377.46	1401.68	1529.83	1060.67	998.808	1051.22	1034.16	1307.82	1180.28	986.77	701.375	1093.43	1341.8	1081.39	843.539	1371.51	1338.75	1205.88	1347.9	1700.64
Arable Land Area (1000 Hectares) (converted to m2)	China	United States	India	Russian Federation	Japan	Germany	Islamic Republic of Iran	Saudi Arabia	Indonesia	Canada	Mexico	South Africa	Brazil	Turkey	Australia	United Kingdom	Poland	France	Italy	Kazakhstan	Afghanistan	Albania	Algeria	Angola	Antigua and Barbuda	Argentina	Armenia	Austria	Azerbaijan	Barbados	Belarus	Belgium	Belize	Benin	Bolivia	Botswana	Bulgaria	Burkina Faso	Cameroon	Central African Republic	Chad	Chile	Colombia	Congo	Croatia	Cuba	Cyprus	Czechia	Denmark
2000	1196660000000	1753680000000	1609300000000	1243740000000	44740000000	118040000000	149240000000	35920000000	205000000000	409710000000	229050000000	138120000000	454480000000	238260000000	234730000000	58760000000	139930000000	183544000000	84790000000	301593000000	76830000000	5780000000	76620000000	30000000000	40000000	276400000000	4500000000	13990000000	18256000000	150000000	61330000000	8620000000	640000000	23800000000	31440000000	3500000000	35260000000	37000000000	59600000000	19300000000	36000000000	17500000000	28180000000	4900000000	8420000000	35040000000	984000000	32430000000	22810000000
2001	1202578444000	1754000000000	1603250000000	1238600000000	44440000000	118130000000	158610000000	36000000000	202000000000	409480000000	231510000000	136850000000	460250000000	238010000000	242000000000	56510000000	135840000000	183459000000	83390000000	293597000000	76830000000	5780000000	75830000000	30000000000	40000000	277460000000	4550000000	13870000000	18357000000	150000000	57610000000	8450000000	650000000	24500000000	31500000000	2000000000	34670000000	45000000000	59600000000	19300000000	39000000000	17500000000	24340000000	4900000000	8530000000	37390000000	980000000	32360000000	22920000000
2002	1206496889000	1729770000000	1604320000000	1234650000000	44190000000	117910000000	160290000000	36000000000	200810000000	406150000000	231840000000	137000000000	466020000000	239940000000	237350000000	57860000000	130100000000	183715000000	82870000000	283459000000	76780000000	5780000000	75470000000	31000000000	40000000	278620000000	4550000000	13850000000	18373000000	140000000	56160000000	8320000000	700000000	25500000000	33000000000	2450000000	33550000000	47000000000	59600000000	19300000000	37000000000	16500000000	22110000000	4900000000	8580000000	37980000000	1000000000	32290000000	22760000000
2003	1208355333000	1707313000000	1597990000000	1225590000000	43970000000	118270000000	161970000000	36000000000	224060000000	402820000000	236520000000	136000000000	471790000000	233720000000	232400000000	56590000000	125870000000	183548000000	79590000000	283436000000	77720000000	5780000000	75037000000	33000000000	40000000	286835000000	4550000000	13800300000	18385000000	140000000	55690000000	8350000000	700000000	26500000000	35140000000	1950000000	33230000000	51000000000	59600000000	19100000000	38000000000	15000000000	22640000000	4900000000	8640000000	37520000000	1120000000	32230000000	22660000000
2004	1210213778000	1685159000000	1596810000000	1221460000000	43790000000	118980000000	163650000000	35000000000	246660000000	399490000000	232140000000	133000000000	477560000000	238710000000	257430000000	58190000000	126100000000	183680000000	79790000000	284788000000	78160000000	5780000000	74930000000	33000000000	40000000	307750000000	4550000000	13793000000	18407000000	130000000	55480000000	8400000000	700000000	26500000000	35790000000	2260000000	33130000000	46000000000	59600000000	19300000000	38000000000	15000000000	22380000000	4900000000	8470000000	37060000000	1130000000	32160000000	22690000000
2005	1212672222000	1662706000000	1594440000000	1217810000000	43600000000	119040000000	165330000000	35000000000	229460000000	396160000000	232960000000	131750000000	483330000000	238300000000	264020000000	57290000000	121410000000	183776000000	77800000000	285623000000	78050000000	5380000000	75110000000	33000000000	40000000	328975000000	4550000000	13807000000	18432000000	130000000	55420000000	8430000000	700000000	26540000000	38060000000	2400000000	31730000000	49000000000	59630000000	19300000000	39000000000	14500000000	20260000000	4900000000	8730000000	36720000000	1230000000	32090000000	23320000000
2006	1216070667000	1640253000000	1586620000000	1215740000000	43430000000	118660000000	167010000000	34500000000	215000000000	392830000000	233630000000	126000000000	489140000000	229810000000	242280000000	60940000000	123680000000	183390000000	73760000000	286160000000	77940000000	5840000000	74700000000	33000000000	40000000	348540000000	4529000000	13772000000	18413000000	130000000	55400000000	8420000000	700000000	25000000000	39050000000	2010000000	31320000000	47000000000	59630000000	19300000000	39000000000	13500000000	19046000000	4900000000	8810000000	36340000000	1150000000	32020000000	23470000000
2007	1215469111000	1617800000000	1580220000000	1215740000000	43260000000	118770000000	168690000000	34460000000	220000000000	388840000000	235190000000	126000000000	495370000000	219790000000	231250000000	60850000000	118230000000	182862000000	71710000000	286412000000	77940000000	5780000000	74690000000	34000000000	40000000	364330000000	4521000000	13760000000	18540000000	130000000	55190000000	8390000000	700000000	25000000000	41710000000	1820000000	30850000000	49000000000	59630000000	19300000000	39000000000	12620000000	19980000000	4900000000	8520000000	35730000000	1098000000	31950000000	23060000000
2008	1217917556000	1604255000000	1579950000000	1216490000000	43080000000	119320000000	155450000000	33390000000	227000000000	384850000000	229450000000	128000000000	501590000000	215550000000	239941000000	60050000000	120430000000	182687000000	74980000000	285198000000	77940000000	6100000000	74890000000	34000000000	40000000	352610000000	4504000000	13690000000	18602000000	130000000	55160000000	8440000000	700000000	25000000000	42660000000	2790000000	30880000000	60000000000	59630000000	19300000000	39000000000	13120000000	18300000000	4900000000	8607000000	35086000000	824000000	31880000000	24020000000
2009	1219836000000	1590710000000	1579240000000	1216490000000	42940000000	119450000000	155660000000	31960000000	236000000000	380860000000	222000000000	126600000000	507820000000	213510000000	271416000000	60490000000	120660000000	182562000000	69810000000	286182000000	77930000000	6090000000	74930000000	40000000000	40000000	342920000000	4494000000	13666000000	18740000000	130000000	55440000000	8400000000	730000000	25000000000	44540000000	3160000000	31460000000	57000000000	59630000000	19500000000	40000000000	13100000000	17750000000	5000000000	8683000000	34460000000	869000000	31800000000	24310000000
2010	1213698000000	1577165000000	1570090000000	1216490000000	42820000000	118460000000	153900000000	31800000000	236000000000	376870000000	215270000000	125330000000	514050000000	213840000000	254502000000	59700000000	108290000000	183007000000	70420000000	286838000000	77930000000	6260000000	75020000000	41000000000	40000000	379810000000	4485000000	13638000000	18841000000	120000000	55350000000	8340000000	750000000	25000000000	42970000000	2590000000	31860000000	60000000000	62000000000	18000000000	42000000000	12710000000	17630000000	5100000000	9044000000	33840000000	826000000	31710000000	24210000000
2011	1206401000000	1563620000000	1569790000000	1216490000000	42540000000	118750000000	152140000000	31590000000	235000000000	372850000000	212090000000	120330000000	520270000000	205390000000	316949000000	60620000000	110980000000	182744000000	67200000000	291806000000	77910000000	6220000000	75020000000	47000000000	40000000	387810000000	4492000000	13596000000	18857000000	110000000	55290000000	8250000000	750000000	25000000000	43380000000	3240000000	32500000000	57000000000	62000000000	18000000000	43000000000	13170000000	15860000000	5300000000	8967000000	33212000000	840000000	31640000000	24990000000
2012	1199595000000	1550075000000	1565460000000	1216490000000	42460000000	118340000000	150380000000	31170000000	235000000000	375340000000	201060000000	120000000000	526500000000	205770000000	316374000000	62120000000	109250000000	182817000000	71180000000	293325000000	77900000000	6191000000	75065000000	47000000000	40000000	397540000000	4484000000	13551000000	18968000000	100000000	55220000000	8030000000	780000000	26000000000	44220000000	2850000000	33170000000	60000000000	62000000000	18000000000	46500000000	12830000000	15780000000	5300000000	9064000000	31349000000	858000000	31570000000	24180000000
2013	1197615000000	1555534000000	1564420000000	1216490000000	42380000000	118760000000	146870000000	30680000000	235000000000	377830000000	197050000000	120000000000	532720000000	205740000000	312208000000	62654000000	107920000000	183057000000	68270000000	293947000000	77850000000	6171000000	74962000000	49000000000	40000000	396990000000	4482000000	13539000000	19253000000	95000000	55597000000	8160000000	780000000	27000000000	45060000000	2800000000	34790000000	62000000000	62000000000	18000000000	50000000000	13090000000	16820000000	5500000000	8764000000	31564000000	797300000	25010000000	24076000000
2014	1196550000000	1560993000000	1564630000000	1216490000000	42220000000	118690000000	146870000000	34300000000	235000000000	380320000000	191170000000	120000000000	538950000000	206990000000	319603000000	62335000000	109280000000	183331000000	67280000000	294702000000	77710000000	6156000000	74694000000	49000000000	40000000	392000000000	4475000000	13517000000	19265000000	90000000	56621000000	8170000000	780000000	27000000000	44690000000	4020000000	34860000000	60000000000	62000000000	18000000000	52000000000	12892000000	17067000000	5500000000	8129000000	3.08797e+10	8.018e+08	24890000000	24320000000
2015	1195934000000	1566451000000	1564160000000	1216490000000	42050000000	118460000000	146870000000	34900000000	238000000000	382820000000	206110000000	120000000000	545180000000	206500000000	310907000000	60110000000	108870000000	184787000000	66010000000	296011000000	77650000000	6151000000	74621000000	49000000000	40000000	392000000000	4467000000	13461000000	19377000000	80000000	56774000000	8295000000	880000000	27000000000	44160000000	2596000000	35097000000	60000000000	62000000000	18000000000	52000000000	13130000000	17315000000	5500000000	8437000000	30137000000	983800000	24900000000	23516510000
2016	1195129000000	1571910000000	1564160000000	1216490000000	41840000000	117620000000	146870000000	34770000000	252000000000	385300000000	221670000000	120000000000	551400000000	203820000000	300570000000	60260105000	108060000000	183559160000	66970000000	296422000000	77290000000	6203000000	74042000000	49000000000	40000000	392000000000	4464000000	13444900000	19990000000	70000000	56838000000	8494000000	880000000	28000000000	44380000000	2596000000	34960000000	60000000000	62000000000	18000000000	52000000000	12698000000	17562000000	5500000000	8740000000	29892000000	816000000	24910000000	23738590000
RIW (GWP/land/capita) - protein supply	China	United States	India	Russian Federation	Japan	Germany	Islamic Republic of Iran	Saudi Arabia	Indonesia	Canada	Mexico	South Africa	Brazil	Turkey	Australia	United Kingdom	Poland	France	Italy	Kazakhstan	Afghanistan	Albania	Algeria	Angola	Antigua and Barbuda	Argentina	Armenia	Austria	Azerbaijan	Barbados	Belarus	Belgium	Belize	Benin	Bolivia	Botswana	Bulgaria	Burkina Faso	Cameroon	Central African Republic	Chad	Chile	Colombia	Congo	Croatia	Cuba	Cyprus	Czechia	Denmark
2000	1.10857e-09	1.03279e-09	5.57457e-10	1.08648e-09	3.41563e-08	1.26816e-08	8.73597e-09	3.69711e-08	4.07005e-09	4.10271e-09	5.957e-09	8.76007e-09	2.7693e-09	7.00511e-09	6.83905e-09	2.66432e-08	1.13036e-08	1.01407e-08	2.12936e-08	4.64868e-09	1.08433e-08	2.47826e-07	1.56922e-08	2.08498e-08	2.80814e-05	6.0081e-09	2.30067e-07	1.20106e-07	5.83076e-08	8.51211e-06	2.24157e-08	1.77556e-07	1.76549e-06	3.6795e-08	2.83074e-08	2.95122e-07	3.85576e-08	2.95359e-08	1.36643e-08	3.80417e-08	2.78384e-08	7.11589e-08	3.56423e-08	1.39553e-07	1.25517e-07	3.15092e-08	1.37102e-06	4.41212e-08	6.93779e-08
2001	1.09903e-09	1.01896e-09	5.54915e-10	1.11082e-09	3.44725e-08	1.3128e-08	8.26085e-09	3.64048e-08	4.11245e-09	4.06554e-09	6.00118e-09	8.8101e-09	2.7456e-09	6.87264e-09	6.59955e-09	2.82425e-08	1.16218e-08	1.02862e-08	2.15998e-08	4.7564e-09	1.02452e-08	2.54516e-07	1.61649e-08	2.12618e-08	2.73722e-05	5.78467e-09	2.27261e-07	1.22128e-07	5.95234e-08	8.98225e-06	2.43335e-08	1.89099e-07	1.82683e-06	3.48964e-08	2.79415e-08	5.39125e-07	3.85601e-08	2.42957e-08	1.46694e-08	3.86329e-08	2.63349e-08	7.20825e-08	4.14999e-08	1.4379e-07	1.34395e-07	3.05502e-08	1.37871e-06	4.54655e-08	7.44104e-08
2002	1.1061e-09	1.0478e-09	5.36764e-10	1.13863e-09	3.38499e-08	1.33058e-08	8.05168e-09	3.60042e-08	4.20469e-09	4.10668e-09	6.00836e-09	8.66049e-09	2.76568e-09	6.83123e-09	6.99791e-09	2.79094e-08	1.22527e-08	1.02538e-08	2.1632e-08	4.95726e-09	1.10114e-08	2.68472e-07	1.67796e-08	2.19715e-08	2.73802e-05	5.14289e-09	2.30918e-07	1.21343e-07	6.11362e-08	9.66798e-06	2.43551e-08	1.91691e-07	1.75656e-06	3.68838e-08	2.71949e-08	4.29365e-07	3.86712e-08	2.38991e-08	1.45657e-08	3.9454e-08	2.67091e-08	7.7863e-08	4.54561e-08	1.4489e-07	1.40705e-07	2.9287e-08	1.34306e-06	4.56278e-08	7.47246e-08
2003	1.11213e-09	1.06335e-09	5.38692e-10	1.16386e-09	3.40156e-08	1.31246e-08	8.04252e-09	3.58501e-08	3.78111e-09	4.09184e-09	5.85396e-09	8.82088e-09	2.83564e-09	6.96421e-09	7.47632e-09	2.88662e-08	1.27199e-08	1.00369e-08	2.22388e-08	5.09912e-09	1.11208e-08	2.62632e-07	1.73516e-08	2.0784e-08	2.7808e-05	5.11328e-09	2.44327e-07	1.17233e-07	6.30099e-08	9.70533e-06	2.4296e-08	1.88782e-07	1.78056e-06	3.39252e-08	2.58184e-08	4.97524e-07	3.74603e-08	2.35721e-08	1.45098e-08	3.8747e-08	2.65526e-08	8.84173e-08	4.4168e-08	1.52263e-07	1.38756e-07	3.24929e-08	1.13393e-06	4.57226e-08	7.22849e-08
2004	1.12496e-09	1.08598e-09	5.35915e-10	1.17636e-09	3.32145e-08	1.28838e-08	8.06067e-09	3.69649e-08	3.47258e-09	4.15808e-09	5.961e-09	9.28437e-09	2.77948e-09	6.83921e-09	6.2483e-09	2.81079e-08	1.24541e-08	9.84416e-09	2.22367e-08	4.98532e-09	1.12002e-08	2.61206e-07	1.76471e-08	2.06303e-08	2.76694e-05	4.72509e-09	2.61428e-07	1.15457e-07	6.4777e-08	1.01874e-05	2.49106e-08	1.87243e-07	1.75996e-06	3.52049e-08	2.46322e-08	4.38255e-07	3.83291e-08	2.58276e-08	1.40552e-08	3.90927e-08	2.61731e-08	8.96112e-08	4.37677e-08	1.57891e-07	1.40773e-07	3.23788e-08	1.12979e-06	4.73448e-08	7.37259e-08
2005	1.13614e-09	1.09693e-09	5.33332e-10	1.22582e-09	3.3581e-08	1.29079e-08	8.08899e-09	3.79067e-08	3.70318e-09	4.08463e-09	5.92233e-09	9.49394e-09	2.724e-09	6.86893e-09	6.29702e-09	2.86491e-08	1.28843e-08	9.59671e-09	2.26832e-08	4.99294e-09	1.08647e-08	2.89375e-07	1.77462e-08	2.14275e-08	3.30416e-05	4.62882e-09	2.69474e-07	1.17865e-07	7.04238e-08	1.0931e-05	2.54781e-08	1.86596e-07	1.72939e-06	3.4501e-08	2.41374e-08	3.93739e-07	3.88666e-08	2.36513e-08	1.51749e-08	3.94622e-08	2.55548e-08	9.38488e-08	4.86839e-08	1.29721e-07	1.41827e-07	3.35849e-08	1.01178e-06	4.9053e-08	7.85773e-08
2006	1.13518e-09	1.10701e-09	5.58434e-10	1.24198e-09	3.28987e-08	1.32457e-08	7.87857e-09	3.83918e-08	4.05322e-09	4.17654e-09	5.97046e-09	1.00278e-08	2.73409e-09	7.10408e-09	6.84178e-09	2.70657e-08	1.26491e-08	9.59012e-09	2.38225e-08	5.12534e-09	1.08699e-08	2.64927e-07	1.7763e-08	2.20325e-08	3.23958e-05	4.46765e-09	2.8304e-07	1.16749e-07	7.4619e-08	1.06104e-05	2.60279e-08	1.88436e-07	1.6574e-06	3.68545e-08	2.4609e-08	4.51293e-07	4.03519e-08	2.53759e-08	1.62991e-08	4.05871e-08	2.54573e-08	1.02984e-07	5.311e-08	1.43887e-07	1.44784e-07	3.5035e-08	1.0513e-06	4.71459e-08	7.6252e-08
2007	1.16247e-09	1.12502e-09	5.81555e-10	1.28422e-09	3.32075e-08	1.36751e-08	7.92975e-09	3.91078e-08	4.04106e-09	4.25445e-09	5.97331e-09	1.01926e-08	2.72786e-09	7.40271e-09	7.42373e-09	2.72021e-08	1.33488e-08	9.58488e-09	2.44704e-08	5.18225e-09	1.13863e-08	2.66717e-07	1.7655e-08	2.2326e-08	3.31565e-05	4.29882e-09	2.88203e-07	1.19396e-07	7.50139e-08	1.10358e-05	2.64198e-08	1.91112e-07	1.64495e-06	3.80715e-08	2.40426e-08	4.99364e-07	3.91071e-08	2.46991e-08	1.6315e-08	4.14575e-08	2.47421e-08	1.0749e-07	5.08018e-08	1.42658e-07	1.51665e-07	3.60811e-08	1.16762e-06	4.715e-08	7.59928e-08
2008	1.19552e-09	1.11516e-09	5.85265e-10	1.29697e-09	3.27871e-08	1.34513e-08	8.33092e-09	3.92077e-08	3.95135e-09	4.31132e-09	6.09097e-09	1.00507e-08	2.79861e-09	7.39099e-09	7.03066e-09	2.71502e-08	1.28905e-08	9.76582e-09	2.33736e-08	5.26098e-09	1.15815e-08	2.64858e-07	1.76587e-08	2.39201e-08	3.37904e-05	4.46507e-09	3.0822e-07	1.17819e-07	7.58799e-08	1.05799e-05	2.61038e-08	1.84722e-07	1.56866e-06	3.97894e-08	2.35518e-08	3.4012e-07	4.10603e-08	2.0686e-08	1.61981e-08	4.20898e-08	2.49615e-08	1.03297e-07	5.61237e-08	1.42852e-07	1.52121e-07	4.06187e-08	1.57357e-06	4.66223e-08	7.20847e-08
2009	1.20339e-09	1.10483e-09	5.78805e-10	1.29776e-09	3.21301e-08	1.36065e-08	8.65666e-09	4.11207e-08	3.89064e-09	4.29158e-09	6.20115e-09	1.00617e-08	2.76302e-09	7.47571e-09	6.03318e-09	2.67457e-08	1.32205e-08	9.65185e-09	2.54269e-08	5.25784e-09	1.17518e-08	2.65188e-07	1.83006e-08	2.03994e-08	3.30575e-05	4.54595e-09	2.98256e-07	1.18698e-07	7.55748e-08	1.04848e-05	2.6172e-08	1.81319e-07	1.51722e-06	4.01063e-08	2.23976e-08	3.21911e-07	4.05401e-08	2.21667e-08	1.65781e-08	4.23813e-08	2.42662e-08	9.93178e-08	5.49432e-08	1.4944e-07	1.53618e-07	4.00091e-08	1.44467e-06	4.61366e-08	6.77046e-08
2010	1.24016e-09	1.11161e-09	6.01456e-10	1.31521e-09	3.24348e-08	1.36306e-08	8.95233e-09	4.43674e-08	4.00346e-09	4.37906e-09	6.41489e-09	1.04102e-08	2.8248e-09	7.66946e-09	6.46278e-09	2.70917e-08	1.48185e-08	9.79897e-09	2.51257e-08	5.46902e-09	1.18229e-08	2.70113e-07	1.8154e-08	2.06942e-08	3.23007e-05	4.14364e-09	2.95003e-07	1.18233e-07	7.48333e-08	1.14193e-05	2.6876e-08	1.84163e-07	1.52958e-06	3.85026e-08	2.39387e-08	3.88473e-07	3.97326e-08	2.13146e-08	1.60697e-08	4.75507e-08	2.34238e-08	1.03562e-07	5.52543e-08	1.47349e-07	1.41354e-07	3.68272e-08	1.55845e-06	4.63774e-08	7.22456e-08
2011	1.25633e-09	1.10086e-09	6.06013e-10	1.31912e-09	3.25626e-08	1.37708e-08	9.03194e-09	4.47878e-08	4.12771e-09	4.41608e-09	6.38405e-09	1.09929e-08	2.87845e-09	8.05983e-09	5.29395e-09	2.6908e-08	1.46093e-08	9.69687e-09	2.59122e-08	5.23797e-09	1.19826e-08	2.76665e-07	1.90307e-08	1.88954e-08	3.35963e-05	4.11169e-09	3.03399e-07	1.2037e-07	7.70388e-08	1.23883e-05	2.81004e-08	1.855e-07	1.50253e-06	3.94724e-08	2.40705e-08	3.11615e-07	3.94963e-08	2.21056e-08	1.65579e-08	4.72778e-08	2.29049e-08	1.02628e-07	6.24899e-08	1.60446e-07	1.44405e-07	4e-08	1.51681e-06	4.54883e-08	6.74604e-08
2012	1.28631e-09	1.12132e-09	5.99084e-10	1.34791e-09	3.30569e-08	1.36337e-08	9.14502e-09	4.63166e-08	4.17694e-09	4.41633e-09	6.82491e-09	1.11631e-08	2.81669e-09	8.28138e-09	5.23495e-09	2.63781e-08	1.47289e-08	9.64359e-09	2.42897e-08	5.12548e-09	1.19841e-08	2.84924e-07	1.90383e-08	1.87436e-08	3.13182e-05	4.06487e-09	3.10125e-07	1.20968e-07	7.65045e-08	1.37951e-05	2.85693e-08	1.95279e-07	1.45592e-06	3.93013e-08	2.33266e-08	3.66823e-07	3.8947e-08	2.12723e-08	1.65579e-08	4.64854e-08	2.13921e-08	1.05299e-07	6.44236e-08	1.48725e-07	1.46042e-07	4.37521e-08	1.4981e-06	4.36014e-08	6.80359e-08
2013	1.29704e-09	1.11657e-09	6.10322e-10	1.3397e-09	3.28052e-08	1.35561e-08	9.41752e-09	4.73301e-08	4.19313e-09	4.40191e-09	7.04744e-09	1.12687e-08	2.82575e-09	8.32803e-09	5.39464e-09	2.61053e-08	1.49002e-08	9.56775e-09	2.51881e-08	5.19766e-09	1.18575e-08	2.8613e-07	1.94407e-08	1.85187e-08	3.31644e-05	4.09725e-09	3.1836e-07	1.24318e-07	7.66725e-08	1.47196e-05	2.67423e-08	1.93411e-07	1.48863e-06	3.78163e-08	2.32153e-08	3.67091e-07	3.8049e-08	2.02896e-08	1.67828e-08	4.05515e-08	1.98788e-08	1.05762e-07	6.06569e-08	1.48849e-07	1.52524e-07	4.5618e-08	1.54259e-06	5.54243e-08	7.16669e-08
2014	1.29846e-09	1.12728e-09	6.21685e-10	1.3483e-09	3.24078e-08	1.38005e-08	9.26754e-09	4.14571e-08	4.35025e-09	4.28017e-09	7.61983e-09	1.10284e-08	2.69723e-09	7.82373e-09	5.37791e-09	2.59033e-08	1.46089e-08	9.61482e-09	2.51771e-08	4.92516e-09	1.14424e-08	2.92258e-07	2.02488e-08	1.90103e-08	3.27762e-05	4.10776e-09	3.47968e-07	1.28284e-07	7.49549e-08	1.54969e-05	2.65274e-08	1.9554e-07	1.39537e-06	4.0211e-08	2.34607e-08	2.74529e-07	3.94682e-08	2.05936e-08	1.66192e-08	4.07187e-08	2.01748e-08	1.06108e-07	6.33353e-08	1.48878e-07	1.64614e-07	4.31032e-08	1.55726e-06	5.61436e-08	6.99966e-08
2015	1.32589e-09	1.1355e-09	6.27748e-10	1.34426e-09	3.23805e-08	1.39236e-08	9.21899e-09	4.10713e-08	4.33736e-09	4.07628e-09	7.08903e-09	1.09795e-08	2.62426e-09	7.88067e-09	5.5421e-09	2.73788e-08	1.45198e-08	9.53735e-09	2.56783e-08	5.05917e-09	1.11472e-08	2.87987e-07	2.00329e-08	1.78783e-08	3.26137e-05	4.25977e-09	3.44263e-07	1.26946e-07	7.42926e-08	1.78104e-05	2.57413e-08	1.95498e-07	1.23663e-06	3.92661e-08	2.46609e-08	4.23164e-07	3.64113e-08	2.04773e-08	1.64889e-08	4.01553e-08	2.17382e-08	1.03798e-07	6.41671e-08	1.59309e-07	1.6392e-07	4.263e-08	1.2711e-06	5.56437e-08	7.16199e-08
2016	1.33302e-09	1.13962e-09	6.39399e-10	1.32355e-09	3.23991e-08	1.41402e-08	9.3312e-09	3.98621e-08	4.20331e-09	4.14506e-09	6.66506e-09	1.10337e-08	2.60357e-09	8.00529e-09	5.70159e-09	2.75289e-08	1.47753e-08	9.66157e-09	2.50547e-08	4.94202e-09	1.11868e-08	2.99624e-07	1.97872e-08	1.69404e-08	3.04823e-05	4.15547e-09	3.42577e-07	1.27769e-07	7.30529e-08	2.04656e-05	2.56482e-08	1.87317e-07	1.25356e-06	3.70996e-08	2.46351e-08	4.14313e-07	3.89066e-08	2.04589e-08	1.65528e-08	4.0525e-08	2.18693e-08	1.099e-07	6.40407e-08	1.5951e-07	1.63205e-07	4.65791e-08	1.53695e-06	5.62767e-08	7.45081e-08
RIW (WU/land/capita) - protein supply	China	United States	India	Russian Federation	Japan	Germany	Islamic Republic of Iran	Saudi Arabia	Indonesia	Canada	Mexico	South Africa	Brazil	Turkey	Australia	United Kingdom	Poland	France	Italy	Kazakhstan	Afghanistan	Albania	Algeria	Angola	Antigua and Barbuda	Argentina	Armenia	Austria	Azerbaijan	Barbados	Belarus	Belgium	Belize	Benin	Bolivia	Botswana	Bulgaria	Burkina Faso	Cameroon	Central African Republic	Chad	Chile	Colombia	Congo	Croatia	Cuba	Cyprus	Czechia	Denmark
2000	2.11101e-07	1.96671e-07	1.06155e-07	2.06895e-07	6.50428e-06	2.41492e-06	1.66356e-06	7.0403e-06	7.75047e-07	7.81267e-07	1.13437e-06	1.66815e-06	5.27349e-07	1.33396e-06	1.30234e-06	5.07358e-06	2.15252e-06	1.93106e-06	4.05487e-06	8.85234e-07	2.06486e-06	4.71928e-05	2.98821e-06	3.97035e-06	0.00534745	1.1441e-06	4.3811e-05	2.28715e-05	1.11033e-05	0.00162093	4.26854e-06	3.38114e-05	0.000336196	7.00676e-06	5.39048e-06	5.61991e-05	7.34239e-06	5.62443e-06	2.60205e-06	7.24416e-06	5.30118e-06	1.35506e-05	6.78726e-06	2.65747e-05	2.39019e-05	6.00019e-06	0.000261078	8.40187e-06	1.32114e-05
2001	2.09284e-07	1.94038e-07	1.05671e-07	2.1153e-07	6.56449e-06	2.49993e-06	1.57309e-06	6.93244e-06	7.83121e-07	7.74188e-07	1.14278e-06	1.67768e-06	5.22836e-07	1.30874e-06	1.25673e-06	5.37812e-06	2.21311e-06	1.95877e-06	4.11317e-06	9.05745e-07	1.95095e-06	4.84667e-05	3.07824e-06	4.04881e-06	0.00521241	1.10156e-06	4.32765e-05	2.32565e-05	1.13349e-05	0.00171046	4.63375e-06	3.60094e-05	0.000347877	6.64521e-06	5.32082e-06	0.000102664	7.34287e-06	4.62655e-06	2.79344e-06	7.35674e-06	5.01488e-06	1.37265e-05	7.90269e-06	2.73815e-05	2.55925e-05	5.81758e-06	0.000262544	8.65785e-06	1.41697e-05
2002	2.1063e-07	1.99529e-07	1.02214e-07	2.16826e-07	6.44592e-06	2.53377e-06	1.53326e-06	6.85616e-06	8.00686e-07	7.82022e-07	1.14415e-06	1.64919e-06	5.26659e-07	1.30085e-06	1.33259e-06	5.3147e-06	2.33325e-06	1.95259e-06	4.11932e-06	9.43995e-07	2.09686e-06	5.11242e-05	3.19529e-06	4.18396e-06	0.00521392	9.79344e-07	4.39729e-05	2.3107e-05	1.1642e-05	0.00184104	4.63786e-06	3.65032e-05	0.000334496	7.02367e-06	5.17864e-06	8.17625e-05	7.36403e-06	4.55102e-06	2.7737e-06	7.5131e-06	5.08613e-06	1.48272e-05	8.65607e-06	2.75909e-05	2.6794e-05	5.57704e-06	0.000255754	8.68876e-06	1.42296e-05
2003	2.1178e-07	2.0249e-07	1.02581e-07	2.2163e-07	6.47749e-06	2.49927e-06	1.53151e-06	6.82682e-06	7.20025e-07	7.79197e-07	1.11475e-06	1.67973e-06	5.39983e-07	1.32617e-06	1.42369e-06	5.4969e-06	2.42221e-06	1.91129e-06	4.23486e-06	9.71009e-07	2.11771e-06	5.00122e-05	3.30421e-06	3.95782e-06	0.0052954	9.73705e-07	4.65264e-05	2.23243e-05	1.19988e-05	0.00184816	4.6266e-06	3.59492e-05	0.000339066	6.46026e-06	4.91651e-06	9.47419e-05	7.13344e-06	4.48876e-06	2.76306e-06	7.37848e-06	5.05632e-06	1.6837e-05	8.41078e-06	2.8995e-05	2.64228e-05	6.18751e-06	0.000215931	8.70681e-06	1.3765e-05
2004	2.14222e-07	2.06799e-07	1.02053e-07	2.2401e-07	6.32494e-06	2.45341e-06	1.53497e-06	7.03912e-06	6.61272e-07	7.91811e-07	1.13513e-06	1.76799e-06	5.29288e-07	1.30237e-06	1.18984e-06	5.3525e-06	2.3716e-06	1.87459e-06	4.23446e-06	9.49339e-07	2.13281e-06	4.97407e-05	3.36048e-06	3.92856e-06	0.00526899	8.99785e-07	4.97829e-05	2.19861e-05	1.23353e-05	0.00193995	4.74365e-06	3.56562e-05	0.000335143	6.70396e-06	4.69062e-06	8.34555e-05	7.29889e-06	4.91828e-06	2.67648e-06	7.4443e-06	4.98405e-06	1.70644e-05	8.33455e-06	3.00666e-05	2.6807e-05	6.16579e-06	0.000215142	9.01572e-06	1.40394e-05
2005	2.16351e-07	2.08884e-07	1.01561e-07	2.33429e-07	6.39472e-06	2.45801e-06	1.54036e-06	7.21846e-06	7.05185e-07	7.77823e-07	1.12777e-06	1.8079e-06	5.18724e-07	1.30803e-06	1.19912e-06	5.45555e-06	2.45352e-06	1.82747e-06	4.31949e-06	9.50789e-07	2.06893e-06	5.51048e-05	3.37935e-06	4.08036e-06	0.00629201	8.81452e-07	5.1315e-05	2.24446e-05	1.34106e-05	0.00208155	4.85171e-06	3.55328e-05	0.000329323	6.56992e-06	4.5964e-06	7.49785e-05	7.40124e-06	4.50384e-06	2.88971e-06	7.51467e-06	4.86632e-06	1.78713e-05	9.27072e-06	2.47024e-05	2.70077e-05	6.39546e-06	0.00019267	9.34101e-06	1.49632e-05
2006	2.16169e-07	2.10805e-07	1.06341e-07	2.36507e-07	6.2648e-06	2.52234e-06	1.50029e-06	7.31083e-06	7.71842e-07	7.95325e-07	1.13694e-06	1.90957e-06	5.20644e-07	1.35281e-06	1.30286e-06	5.15404e-06	2.40873e-06	1.82622e-06	4.53644e-06	9.76002e-07	2.06991e-06	5.04491e-05	3.38255e-06	4.19559e-06	0.00616904	8.50761e-07	5.38984e-05	2.22321e-05	1.42095e-05	0.0020205	4.95641e-06	3.58833e-05	0.000315614	7.01808e-06	4.68621e-06	8.59383e-05	7.68409e-06	4.83225e-06	3.10378e-06	7.72888e-06	4.84774e-06	1.96109e-05	1.01136e-05	2.73999e-05	2.75708e-05	6.6716e-06	0.000200195	8.97785e-06	1.45204e-05
2007	2.21365e-07	2.14235e-07	1.10744e-07	2.4455e-07	6.3236e-06	2.6041e-06	1.51004e-06	7.44717e-06	7.69526e-07	8.10161e-07	1.13748e-06	1.94094e-06	5.19457e-07	1.40967e-06	1.41368e-06	5.18002e-06	2.54198e-06	1.82522e-06	4.65982e-06	9.86839e-07	2.16826e-06	5.07901e-05	3.36199e-06	4.25148e-06	0.00631389	8.1861e-07	5.48815e-05	2.27362e-05	1.42847e-05	0.00210151	5.03104e-06	3.63928e-05	0.000313242	7.24984e-06	4.57836e-06	9.50923e-05	7.44704e-06	4.70338e-06	3.10682e-06	7.89462e-06	4.71156e-06	2.0469e-05	9.67402e-06	2.71659e-05	2.88811e-05	6.87081e-06	0.000222346	8.97863e-06	1.44711e-05
2008	2.2766e-07	2.12356e-07	1.1145e-07	2.46979e-07	6.24355e-06	2.5615e-06	1.58643e-06	7.4662e-06	7.52443e-07	8.20991e-07	1.15988e-06	1.91391e-06	5.3293e-07	1.40744e-06	1.33883e-06	5.17013e-06	2.45469e-06	1.85967e-06	4.45096e-06	1.00183e-06	2.20543e-06	5.0436e-05	3.36268e-06	4.55503e-06	0.0064346	8.50269e-07	5.86934e-05	2.24358e-05	1.44496e-05	0.0020147	4.97086e-06	3.51761e-05	0.000298714	7.57697e-06	4.48489e-06	6.47681e-05	7.81898e-06	3.93917e-06	3.08455e-06	8.01502e-06	4.75334e-06	1.96706e-05	1.06875e-05	2.72029e-05	2.89679e-05	7.73489e-06	0.000299651	8.87813e-06	1.37269e-05
2009	2.29157e-07	2.10389e-07	1.1022e-07	2.47128e-07	6.11843e-06	2.59105e-06	1.64846e-06	7.83048e-06	7.40883e-07	8.17231e-07	1.18086e-06	1.91601e-06	5.26154e-07	1.42358e-06	1.14888e-06	5.09311e-06	2.51754e-06	1.83797e-06	4.84197e-06	1.00123e-06	2.23785e-06	5.0499e-05	3.48493e-06	3.8846e-06	0.00629503	8.65671e-07	5.6796e-05	2.26033e-05	1.43915e-05	0.00199659	4.98386e-06	3.45281e-05	0.000288919	7.63732e-06	4.2651e-06	6.13004e-05	7.71991e-06	4.22114e-06	3.15692e-06	8.07055e-06	4.62093e-06	1.89128e-05	1.04627e-05	2.84574e-05	2.9253e-05	7.61881e-06	0.000275105	8.78564e-06	1.28928e-05
2010	2.36159e-07	2.1168e-07	1.14533e-07	2.50452e-07	6.17645e-06	2.59563e-06	1.70476e-06	8.44875e-06	7.62365e-07	8.33891e-07	1.22157e-06	1.98238e-06	5.37917e-07	1.46047e-06	1.23069e-06	5.15899e-06	2.82184e-06	1.86599e-06	4.7846e-06	1.04145e-06	2.2514e-06	5.14367e-05	3.45702e-06	3.94074e-06	0.00615093	7.8906e-07	5.61766e-05	2.25147e-05	1.42503e-05	0.00217454	5.11791e-06	3.50696e-05	0.000291273	7.33193e-06	4.55858e-06	7.39757e-05	7.56616e-06	4.05887e-06	3.0601e-06	9.05493e-06	4.46052e-06	1.9721e-05	1.05219e-05	2.80592e-05	2.69175e-05	7.01288e-06	0.00029677	8.83151e-06	1.37575e-05
2011	2.39239e-07	2.09634e-07	1.15401e-07	2.51196e-07	6.20079e-06	2.62233e-06	1.71992e-06	8.5288e-06	7.86028e-07	8.40939e-07	1.21569e-06	2.09334e-06	5.48133e-07	1.53481e-06	1.00811e-06	5.124e-06	2.782e-06	1.84654e-06	4.93438e-06	9.9745e-07	2.28181e-06	5.26845e-05	3.62395e-06	3.59819e-06	0.00639763	7.82976e-07	5.77753e-05	2.29217e-05	1.46703e-05	0.00235906	5.35106e-06	3.53241e-05	0.000286123	7.51661e-06	4.58367e-06	5.93398e-05	7.52116e-06	4.2095e-06	3.15306e-06	9.00295e-06	4.3617e-06	1.95432e-05	1.18998e-05	3.05533e-05	2.74986e-05	7.61707e-06	0.000288842	8.6622e-06	1.28463e-05
2012	2.44948e-07	2.1353e-07	1.14082e-07	2.56678e-07	6.29492e-06	2.59622e-06	1.74146e-06	8.81992e-06	7.95402e-07	8.40989e-07	1.29965e-06	2.12575e-06	5.36374e-07	1.577e-06	9.96874e-07	5.02311e-06	2.80478e-06	1.8364e-06	4.62541e-06	9.7603e-07	2.2821e-06	5.42571e-05	3.6254e-06	3.56929e-06	0.00596383	7.7406e-07	5.90561e-05	2.30356e-05	1.45685e-05	0.00262695	5.44037e-06	3.71863e-05	0.000277246	7.48402e-06	4.442e-06	6.9853e-05	7.41655e-06	4.05083e-06	3.15306e-06	8.85207e-06	4.07364e-06	2.00517e-05	1.2268e-05	2.83213e-05	2.78103e-05	8.33157e-06	0.000285279	8.30287e-06	1.29559e-05
2013	2.46991e-07	2.12625e-07	1.16222e-07	2.55115e-07	6.24698e-06	2.58145e-06	1.79335e-06	9.01292e-06	7.98484e-07	8.38242e-07	1.34202e-06	2.14587e-06	5.38099e-07	1.58588e-06	1.02728e-06	4.97114e-06	2.83739e-06	1.82196e-06	4.79649e-06	9.89775e-07	2.25798e-06	5.44867e-05	3.70204e-06	3.52646e-06	0.0063154	7.80226e-07	6.06243e-05	2.36735e-05	1.46005e-05	0.00280301	5.09246e-06	3.68306e-05	0.000283475	7.20125e-06	4.42081e-06	6.9904e-05	7.24555e-06	3.86369e-06	3.19589e-06	7.72209e-06	3.78547e-06	2.01399e-05	1.15507e-05	2.83449e-05	2.90446e-05	8.68688e-06	0.000293751	1.05543e-05	1.36473e-05
2014	2.47261e-07	2.14665e-07	1.18385e-07	2.56753e-07	6.17131e-06	2.62798e-06	1.76479e-06	7.89454e-06	8.28404e-07	8.15059e-07	1.45102e-06	2.1001e-06	5.13625e-07	1.48985e-06	1.0241e-06	4.93268e-06	2.78192e-06	1.83092e-06	4.7944e-06	9.37882e-07	2.17895e-06	5.56539e-05	3.85592e-06	3.62007e-06	0.00624146	7.82229e-07	6.62624e-05	2.44287e-05	1.42734e-05	0.00295102	5.05152e-06	3.72362e-05	0.000265717	7.65726e-06	4.46754e-06	5.22776e-05	7.51581e-06	3.92157e-06	3.16474e-06	7.75394e-06	3.84183e-06	2.02057e-05	1.20607e-05	2.83504e-05	3.13469e-05	8.20801e-06	0.000296543	1.06912e-05	1.33292e-05
2015	2.52486e-07	2.16229e-07	1.1954e-07	2.55984e-07	6.16611e-06	2.65142e-06	1.75554e-06	7.82107e-06	8.25951e-07	7.76234e-07	1.34994e-06	2.0908e-06	4.99729e-07	1.50069e-06	1.05536e-06	5.21366e-06	2.76495e-06	1.81617e-06	4.88984e-06	9.63401e-07	2.12272e-06	5.48405e-05	3.8148e-06	3.40451e-06	0.00621053	8.11174e-07	6.55569e-05	2.41738e-05	1.41473e-05	0.00339157	4.90184e-06	3.7228e-05	0.000235487	7.47731e-06	4.6961e-06	8.05818e-05	6.93368e-06	3.89944e-06	3.13992e-06	7.64664e-06	4.13954e-06	1.97659e-05	1.22191e-05	3.03366e-05	3.12148e-05	8.11789e-06	0.000242052	1.05961e-05	1.36384e-05
2016	2.53842e-07	2.17014e-07	1.21759e-07	2.52039e-07	6.16965e-06	2.69268e-06	1.77691e-06	7.59081e-06	8.00422e-07	7.8933e-07	1.26921e-06	2.10111e-06	4.95789e-07	1.52442e-06	1.08574e-06	5.24224e-06	2.81361e-06	1.83982e-06	4.77108e-06	9.41093e-07	2.13027e-06	5.70565e-05	3.76801e-06	3.22591e-06	0.00580464	7.91313e-07	6.52359e-05	2.43307e-05	1.39112e-05	0.00389721	4.88411e-06	3.56701e-05	0.000238711	7.06477e-06	4.69118e-06	7.88963e-05	7.40885e-06	3.89592e-06	3.15209e-06	7.71706e-06	4.16449e-06	2.09279e-05	1.21951e-05	3.0375e-05	3.10787e-05	8.86992e-06	0.000292677	1.07166e-05	1.41883e-05
RIW (EU/land/capita) - protein supply	China	United States	India	Russian Federation	Japan	Germany	Islamic Republic of Iran	Saudi Arabia	Indonesia	Canada	Mexico	South Africa	Brazil	Turkey	Australia	United Kingdom	Poland	France	Italy	Kazakhstan	Afghanistan	Albania	Algeria	Angola	Antigua and Barbuda	Argentina	Armenia	Austria	Azerbaijan	Barbados	Belarus	Belgium	Belize	Benin	Bolivia	Botswana	Bulgaria	Burkina Faso	Cameroon	Central African Republic	Chad	Chile	Colombia	Congo	Croatia	Cuba	Cyprus	Czechia	Denmark
2000	2.43261e-08	2.26633e-08	1.22327e-08	2.38414e-08	7.49517e-07	2.78281e-07	1.917e-07	8.11284e-07	8.9312e-08	9.00288e-08	1.30719e-07	1.92228e-07	6.07688e-08	1.53718e-07	1.50074e-07	5.84651e-07	2.48044e-07	2.22525e-07	4.6726e-07	1.02009e-07	2.37943e-07	5.43823e-06	3.44345e-07	4.57521e-07	0.00061621	1.3184e-07	5.04854e-06	2.63558e-06	1.27948e-06	0.000186787	4.91883e-07	3.89624e-06	3.87414e-05	8.07419e-07	6.21169e-07	6.47607e-06	8.46096e-07	6.48128e-07	2.99846e-07	8.34777e-07	6.10878e-07	1.56149e-06	7.82126e-07	3.06232e-06	2.75432e-06	6.91428e-07	3.00852e-05	9.68184e-07	1.52241e-06
2001	2.41167e-08	2.23598e-08	1.21769e-08	2.43755e-08	7.56455e-07	2.88078e-07	1.81274e-07	7.98856e-07	9.02425e-08	8.92131e-08	1.31688e-07	1.93326e-07	6.02487e-08	1.50811e-07	1.44819e-07	6.19744e-07	2.55026e-07	2.25717e-07	4.73979e-07	1.04373e-07	2.24817e-07	5.58503e-06	3.54719e-07	4.66563e-07	0.000600649	1.26937e-07	4.98694e-06	2.67994e-06	1.30616e-06	0.000197104	5.33967e-07	4.14952e-06	4.00874e-05	7.65756e-07	6.13141e-07	1.18304e-05	8.46151e-07	5.33137e-07	3.21901e-07	8.4775e-07	5.77887e-07	1.58176e-06	9.10661e-07	3.15529e-06	2.94914e-06	6.70385e-07	3.02541e-05	9.97681e-07	1.63284e-06
2002	2.42718e-08	2.29926e-08	1.17786e-08	2.49858e-08	7.42792e-07	2.91978e-07	1.76684e-07	7.90065e-07	9.22665e-08	9.01158e-08	1.31846e-07	1.90043e-07	6.06892e-08	1.49903e-07	1.5356e-07	6.12436e-07	2.6887e-07	2.25005e-07	4.74687e-07	1.08781e-07	2.4163e-07	5.89127e-06	3.68207e-07	4.82136e-07	0.000600822	1.12854e-07	5.06719e-06	2.66272e-06	1.34156e-06	0.000212151	5.3444e-07	4.20642e-06	3.85454e-05	8.09368e-07	5.96757e-07	9.42185e-06	8.48589e-07	5.24434e-07	3.19625e-07	8.65768e-07	5.86097e-07	1.7086e-06	9.97477e-07	3.17941e-06	3.08759e-06	6.42666e-07	2.94717e-05	1.00124e-06	1.63973e-06
2003	2.44043e-08	2.33338e-08	1.18209e-08	2.55394e-08	7.46429e-07	2.88002e-07	1.76483e-07	7.86684e-07	8.29717e-08	8.97903e-08	1.28458e-07	1.93563e-07	6.22246e-08	1.52821e-07	1.64058e-07	6.33432e-07	2.79122e-07	2.20246e-07	4.88001e-07	1.11894e-07	2.44032e-07	5.76312e-06	3.80759e-07	4.56077e-07	0.000610212	1.12204e-07	5.36144e-06	2.57253e-06	1.38267e-06	0.000212971	5.33144e-07	4.14258e-06	3.9072e-05	7.44444e-07	5.66551e-07	1.09175e-05	8.22018e-07	5.17259e-07	3.184e-07	8.50254e-07	5.82662e-07	1.9402e-06	9.69211e-07	3.34122e-06	3.04481e-06	7.13014e-07	2.48826e-05	1.00332e-06	1.5862e-06
2004	2.46858e-08	2.38304e-08	1.176e-08	2.58137e-08	7.2885e-07	2.82717e-07	1.76881e-07	8.11148e-07	7.62013e-08	9.12438e-08	1.30806e-07	2.03734e-07	6.09922e-08	1.50078e-07	1.37111e-07	6.16792e-07	2.7329e-07	2.16018e-07	4.87955e-07	1.09396e-07	2.45773e-07	5.73183e-06	3.87243e-07	4.52705e-07	0.000607169	1.03686e-07	5.7367e-06	2.53355e-06	1.42145e-06	0.000223549	5.46632e-07	4.10881e-06	3.862e-05	7.72527e-07	5.40521e-07	9.61694e-06	8.41083e-07	5.66754e-07	3.08423e-07	8.5784e-07	5.74334e-07	1.9664e-06	9.60426e-07	3.46471e-06	3.08909e-06	7.1051e-07	2.47917e-05	1.03892e-06	1.61782e-06
2005	2.49311e-08	2.40706e-08	1.17033e-08	2.6899e-08	7.36892e-07	2.83247e-07	1.77503e-07	8.31814e-07	8.12615e-08	8.9632e-08	1.29958e-07	2.08332e-07	5.97748e-08	1.5073e-07	1.3818e-07	6.28667e-07	2.8273e-07	2.10588e-07	4.97754e-07	1.09564e-07	2.38412e-07	6.34996e-06	3.89417e-07	4.70198e-07	0.000725056	1.01574e-07	5.91325e-06	2.58639e-06	1.54536e-06	0.000239866	5.59083e-07	4.0946e-06	3.79493e-05	7.5708e-07	5.29663e-07	8.6401e-06	8.52877e-07	5.18997e-07	3.32994e-07	8.65948e-07	5.60767e-07	2.05939e-06	1.06831e-06	2.84657e-06	3.11221e-06	7.36977e-07	2.22022e-05	1.07641e-06	1.72428e-06
2006	2.491e-08	2.4292e-08	1.22541e-08	2.72538e-08	7.2192e-07	2.9066e-07	1.72885e-07	8.42459e-07	8.89427e-08	9.16488e-08	1.31014e-07	2.20048e-07	5.99961e-08	1.5589e-07	1.50134e-07	5.93923e-07	2.77569e-07	2.10443e-07	5.22754e-07	1.12469e-07	2.38525e-07	5.81347e-06	3.89786e-07	4.83476e-07	0.000710885	9.80369e-08	6.21095e-06	2.56191e-06	1.63742e-06	0.000232831	5.71149e-07	4.13499e-06	3.63695e-05	8.08724e-07	5.40012e-07	9.90305e-06	8.85471e-07	5.56842e-07	3.57662e-07	8.90633e-07	5.58627e-07	2.25985e-06	1.16543e-06	3.15741e-06	3.1771e-06	7.68798e-07	2.30693e-05	1.03456e-06	1.67325e-06
2007	2.55089e-08	2.46872e-08	1.27615e-08	2.81805e-08	7.28696e-07	3.00082e-07	1.74008e-07	8.5817e-07	8.86759e-08	9.33584e-08	1.31077e-07	2.23663e-07	5.98593e-08	1.62443e-07	1.62904e-07	5.96916e-07	2.92923e-07	2.10328e-07	5.36971e-07	1.13718e-07	2.49858e-07	5.85276e-06	3.87417e-07	4.89916e-07	0.000727577	9.4332e-08	6.32424e-06	2.61999e-06	1.64608e-06	0.000242167	5.79749e-07	4.19371e-06	3.60963e-05	8.35431e-07	5.27584e-07	1.09579e-05	8.58155e-07	5.41991e-07	3.58012e-07	9.09732e-07	5.42933e-07	2.35874e-06	1.11478e-06	3.13045e-06	3.3281e-06	7.91753e-07	2.56219e-05	1.03465e-06	1.66756e-06
2008	2.62342e-08	2.44708e-08	1.28429e-08	2.84604e-08	7.19471e-07	2.95172e-07	1.82811e-07	8.60362e-07	8.67073e-08	9.46064e-08	1.33658e-07	2.20549e-07	6.14118e-08	1.62186e-07	1.54279e-07	5.95776e-07	2.82865e-07	2.14298e-07	5.12904e-07	1.15446e-07	2.54141e-07	5.81196e-06	3.87496e-07	5.24896e-07	0.000741487	9.79802e-08	6.76349e-06	2.58538e-06	1.66509e-06	0.000232162	5.72814e-07	4.05349e-06	3.44221e-05	8.73127e-07	5.16813e-07	7.46351e-06	9.01015e-07	4.53928e-07	3.55446e-07	9.23606e-07	5.47748e-07	2.26673e-06	1.23156e-06	3.1347e-06	3.33809e-06	8.91325e-07	3.45301e-05	1.02307e-06	1.58181e-06
2009	2.64068e-08	2.42441e-08	1.27011e-08	2.84776e-08	7.05053e-07	2.98578e-07	1.89959e-07	9.0234e-07	8.53752e-08	9.41731e-08	1.36076e-07	2.2079e-07	6.0631e-08	1.64045e-07	1.3239e-07	5.86901e-07	2.90107e-07	2.11797e-07	5.57962e-07	1.15377e-07	2.57877e-07	5.81922e-06	4.01584e-07	4.47639e-07	0.000725403	9.97551e-08	6.54485e-06	2.60468e-06	1.65839e-06	0.000230076	5.74312e-07	3.97882e-06	3.32933e-05	8.80082e-07	4.91486e-07	7.06392e-06	8.89599e-07	4.86421e-07	3.63786e-07	9.30004e-07	5.3249e-07	2.1794e-06	1.20566e-06	3.27927e-06	3.37095e-06	8.77949e-07	3.17015e-05	1.01241e-06	1.48569e-06
2010	2.72136e-08	2.43928e-08	1.31982e-08	2.88606e-08	7.11739e-07	2.99106e-07	1.96447e-07	9.73586e-07	8.78507e-08	9.60929e-08	1.40766e-07	2.28438e-07	6.19866e-08	1.68296e-07	1.41817e-07	5.94493e-07	3.25173e-07	2.15026e-07	5.51351e-07	1.20011e-07	2.59439e-07	5.92728e-06	3.98367e-07	4.54109e-07	0.000708798	9.09268e-08	6.47347e-06	2.59447e-06	1.64212e-06	0.000250582	5.89759e-07	4.04122e-06	3.35647e-05	8.4489e-07	5.25305e-07	8.52454e-06	8.71882e-07	4.67722e-07	3.52628e-07	1.04344e-06	5.14005e-07	2.27254e-06	1.21248e-06	3.23338e-06	3.10182e-06	8.08125e-07	3.41981e-05	1.01769e-06	1.58534e-06
2011	2.75685e-08	2.4157e-08	1.32982e-08	2.89464e-08	7.14544e-07	3.02182e-07	1.98194e-07	9.82811e-07	9.05774e-08	9.69051e-08	1.4009e-07	2.41225e-07	6.31638e-08	1.76863e-07	1.16169e-07	5.90461e-07	3.20582e-07	2.12785e-07	5.6861e-07	1.14941e-07	2.62943e-07	6.07106e-06	4.17604e-07	4.14635e-07	0.000737227	9.02258e-08	6.6577e-06	2.64136e-06	1.69052e-06	0.000271844	6.16626e-07	4.07055e-06	3.29712e-05	8.66172e-07	5.28196e-07	6.83798e-06	8.66696e-07	4.85079e-07	3.63341e-07	1.03745e-06	5.02618e-07	2.25205e-06	1.37126e-06	3.52079e-06	3.16879e-06	8.77748e-07	3.32845e-05	9.98183e-07	1.48033e-06
2012	2.82264e-08	2.46059e-08	1.31461e-08	2.95782e-08	7.25391e-07	2.99174e-07	2.00676e-07	1.01636e-06	9.16576e-08	9.69108e-08	1.49764e-07	2.4496e-07	6.18087e-08	1.81724e-07	1.14874e-07	5.78834e-07	3.23207e-07	2.11616e-07	5.33006e-07	1.12472e-07	2.62976e-07	6.25228e-06	4.17771e-07	4.11305e-07	0.000687238	8.91984e-08	6.80529e-06	2.6545e-06	1.67879e-06	0.000302715	6.26917e-07	4.28514e-06	3.19483e-05	8.62416e-07	5.11871e-07	8.04946e-06	8.54641e-07	4.66794e-07	3.63341e-07	1.02006e-06	4.69423e-07	2.31064e-06	1.41369e-06	3.26359e-06	3.2047e-06	9.60083e-07	3.2874e-05	9.56776e-07	1.49296e-06
2013	2.84618e-08	2.45017e-08	1.33927e-08	2.93981e-08	7.19867e-07	2.97472e-07	2.06655e-07	1.0386e-06	9.20128e-08	9.65942e-08	1.54647e-07	2.47278e-07	6.20075e-08	1.82748e-07	1.18378e-07	5.72846e-07	3.26965e-07	2.09952e-07	5.5272e-07	1.14056e-07	2.60197e-07	6.27875e-06	4.26602e-07	4.06369e-07	0.000727751	8.99088e-08	6.986e-06	2.728e-06	1.68248e-06	0.000323003	5.86826e-07	4.24415e-06	3.26661e-05	8.29831e-07	5.09429e-07	8.05535e-06	8.34936e-07	4.4523e-07	3.68277e-07	8.8985e-07	4.36216e-07	2.3208e-06	1.33104e-06	3.26631e-06	3.34694e-06	1.00103e-06	3.38502e-05	1.21622e-06	1.57264e-06
2014	2.8493e-08	2.47368e-08	1.36421e-08	2.95867e-08	7.11146e-07	3.02833e-07	2.03364e-07	9.09722e-07	9.54607e-08	9.39228e-08	1.67207e-07	2.42004e-07	5.91873e-08	1.71682e-07	1.18011e-07	5.68414e-07	3.20573e-07	2.10985e-07	5.5248e-07	1.08076e-07	2.5109e-07	6.41324e-06	4.44334e-07	4.17156e-07	0.000719231	9.01396e-08	7.6357e-06	2.81502e-06	1.64479e-06	0.000340059	5.82109e-07	4.29088e-06	3.06197e-05	8.8238e-07	5.14814e-07	6.02418e-06	8.66079e-07	4.51899e-07	3.64687e-07	8.9352e-07	4.42711e-07	2.32839e-06	1.38981e-06	3.26694e-06	3.61224e-06	9.45845e-07	3.4172e-05	1.232e-06	1.53598e-06
2015	2.9095e-08	2.4917e-08	1.37751e-08	2.94981e-08	7.10548e-07	3.05535e-07	2.02299e-07	9.01256e-07	9.51779e-08	8.94488e-08	1.5556e-07	2.40932e-07	5.7586e-08	1.72931e-07	1.21614e-07	6.00793e-07	3.18618e-07	2.09285e-07	5.63478e-07	1.11017e-07	2.44611e-07	6.31951e-06	4.39596e-07	3.92317e-07	0.000715666	9.34751e-08	7.5544e-06	2.78566e-06	1.63026e-06	0.000390826	5.6486e-07	4.28995e-06	2.71362e-05	8.61643e-07	5.41152e-07	9.2858e-06	7.98998e-07	4.49349e-07	3.61827e-07	8.81156e-07	4.77017e-07	2.27771e-06	1.40807e-06	3.49582e-06	3.59701e-06	9.3546e-07	2.78927e-05	1.22103e-06	1.57161e-06
2016	2.92514e-08	2.50075e-08	1.40308e-08	2.90436e-08	7.10956e-07	3.10289e-07	2.04761e-07	8.74722e-07	9.22361e-08	9.09579e-08	1.46256e-07	2.4212e-07	5.71319e-08	1.75666e-07	1.25114e-07	6.04086e-07	3.24224e-07	2.12011e-07	5.49793e-07	1.08446e-07	2.4548e-07	6.57487e-06	4.34204e-07	3.71736e-07	0.000668894	9.11864e-08	7.51741e-06	2.80373e-06	1.60305e-06	0.000449092	5.62817e-07	4.11042e-06	2.75077e-05	8.14104e-07	5.40585e-07	9.09156e-06	8.53754e-07	4.48943e-07	3.63229e-07	8.8927e-07	4.79893e-07	2.41162e-06	1.40529e-06	3.50025e-06	3.58133e-06	1.02212e-06	3.37265e-05	1.23492e-06	1.63498e-06
RIW (LU/ALU/Capita) - protein supply	China	United States	India	Russian Federation	Japan	Germany	Islamic Republic of Iran	Saudi Arabia	Indonesia	Canada	Mexico	South Africa	Brazil	Turkey	Australia	United Kingdom	Poland	France	Italy	Kazakhstan	Afghanistan	Albania	Algeria	Angola	Antigua and Barbuda	Argentina	Armenia	Austria	Azerbaijan	Barbados	Belarus	Belgium	Belize	Benin	Bolivia	Botswana	Bulgaria	Burkina Faso	Cameroon	Central African Republic	Chad	Chile	Colombia	Congo	Croatia	Cuba	Cyprus	Czechia	Denmark
2000	1.0659e-09	9.93041e-10	5.36001e-10	1.04466e-09	3.28417e-08	1.21935e-08	8.39973e-09	3.55481e-08	3.9134e-09	3.9448e-09	5.72772e-09	8.4229e-09	2.66271e-09	6.73549e-09	6.57582e-09	2.56177e-08	1.08686e-08	9.75039e-09	2.0474e-08	4.46976e-09	1.0426e-08	2.38288e-07	1.50882e-08	2.00473e-08	2.70006e-05	5.77685e-09	2.21212e-07	1.15484e-07	5.60633e-08	8.18449e-06	2.15529e-08	1.70722e-07	1.69754e-06	3.53788e-08	2.72179e-08	2.83763e-07	3.70735e-08	2.83991e-08	1.31384e-08	3.65775e-08	2.67669e-08	6.842e-08	3.42705e-08	1.34182e-07	1.20686e-07	3.02964e-08	1.31825e-06	4.24231e-08	6.67076e-08
2001	1.05672e-09	9.79742e-10	5.33557e-10	1.06807e-09	3.31457e-08	1.26228e-08	7.9429e-09	3.50036e-08	3.95417e-09	3.90906e-09	5.7702e-09	8.47101e-09	2.63993e-09	6.60812e-09	6.34554e-09	2.71554e-08	1.11745e-08	9.89029e-09	2.07684e-08	4.57333e-09	9.85082e-09	2.4472e-07	1.55428e-08	2.04434e-08	2.63187e-05	5.56202e-09	2.18514e-07	1.17428e-07	5.72324e-08	8.63653e-06	2.33969e-08	1.8182e-07	1.75651e-06	3.35533e-08	2.68661e-08	5.18374e-07	3.70759e-08	2.33605e-08	1.41048e-08	3.7146e-08	2.53213e-08	6.93081e-08	3.99026e-08	1.38256e-07	1.29223e-07	2.93744e-08	1.32565e-06	4.37155e-08	7.15464e-08
2002	1.06352e-09	1.00747e-09	5.16105e-10	1.09481e-09	3.2547e-08	1.27936e-08	7.74178e-09	3.46184e-08	4.04285e-09	3.94862e-09	5.7771e-09	8.32715e-09	2.65923e-09	6.5683e-09	6.72857e-09	2.68352e-08	1.17811e-08	9.85909e-09	2.07994e-08	4.76646e-09	1.05876e-08	2.58139e-07	1.61338e-08	2.11258e-08	2.63263e-05	4.94495e-09	2.2203e-07	1.16673e-07	5.87832e-08	9.29587e-06	2.34176e-08	1.84313e-07	1.68895e-06	3.54642e-08	2.61482e-08	4.12839e-07	3.71828e-08	2.29792e-08	1.40051e-08	3.79355e-08	2.56811e-08	7.48662e-08	4.37066e-08	1.39313e-07	1.35289e-07	2.81598e-08	1.29136e-06	4.38717e-08	7.18485e-08
2003	1.06933e-09	1.02242e-09	5.17959e-10	1.11906e-09	3.27064e-08	1.26194e-08	7.73297e-09	3.44703e-08	3.63558e-09	3.93435e-09	5.62864e-09	8.48137e-09	2.7265e-09	6.69616e-09	7.18856e-09	2.77552e-08	1.22303e-08	9.65056e-09	2.13828e-08	4.90286e-09	1.06928e-08	2.52523e-07	1.66838e-08	1.9984e-08	2.67377e-05	4.91647e-09	2.34923e-07	1.12721e-07	6.05847e-08	9.33178e-06	2.33608e-08	1.81516e-07	1.71202e-06	3.26194e-08	2.48246e-08	4.78374e-07	3.60185e-08	2.26648e-08	1.39514e-08	3.72557e-08	2.55306e-08	8.50142e-08	4.2468e-08	1.46403e-07	1.33415e-07	3.12422e-08	1.09029e-06	4.39628e-08	6.95027e-08
2004	1.08166e-09	1.04418e-09	5.15288e-10	1.13108e-09	3.19361e-08	1.23879e-08	7.75042e-09	3.55422e-08	3.33892e-09	3.99804e-09	5.73156e-09	8.92702e-09	2.6725e-09	6.57598e-09	6.00781e-09	2.70261e-08	1.19748e-08	9.46527e-09	2.13808e-08	4.79344e-09	1.07691e-08	2.51153e-07	1.69679e-08	1.98363e-08	2.66044e-05	4.54323e-09	2.51366e-07	1.11013e-07	6.22838e-08	9.79527e-06	2.39519e-08	1.80036e-07	1.69222e-06	3.38499e-08	2.36841e-08	4.21387e-07	3.68539e-08	2.48336e-08	1.35142e-08	3.75881e-08	2.51657e-08	8.61621e-08	4.20831e-08	1.51814e-07	1.35355e-07	3.11325e-08	1.0863e-06	4.55225e-08	7.08882e-08
2005	1.09241e-09	1.05471e-09	5.12804e-10	1.17864e-09	3.22885e-08	1.24111e-08	7.77765e-09	3.64477e-08	3.56065e-09	3.92742e-09	5.69438e-09	9.12853e-09	2.61916e-09	6.60455e-09	6.05465e-09	2.75464e-08	1.23884e-08	9.22734e-09	2.18102e-08	4.80076e-09	1.04465e-08	2.78237e-07	1.70631e-08	2.06027e-08	3.17699e-05	4.45066e-09	2.59102e-07	1.13328e-07	6.77133e-08	1.05103e-05	2.44974e-08	1.79414e-07	1.66283e-06	3.31731e-08	2.32083e-08	3.78585e-07	3.73706e-08	2.2741e-08	1.45908e-08	3.79434e-08	2.45712e-08	9.02366e-08	4.68101e-08	1.24729e-07	1.36368e-07	3.22922e-08	9.72836e-07	4.7165e-08	7.55529e-08
2006	1.09149e-09	1.06441e-09	5.3694e-10	1.19418e-09	3.16325e-08	1.27359e-08	7.57533e-09	3.69141e-08	3.89722e-09	4.01579e-09	5.74066e-09	9.64185e-09	2.62886e-09	6.83065e-09	6.57845e-09	2.6024e-08	1.21623e-08	9.22101e-09	2.29056e-08	4.92807e-09	1.04515e-08	2.5473e-07	1.70793e-08	2.11845e-08	3.11489e-05	4.29569e-09	2.72146e-07	1.12255e-07	7.1747e-08	1.0202e-05	2.50261e-08	1.81183e-07	1.59361e-06	3.5436e-08	2.36618e-08	4.33923e-07	3.87988e-08	2.43992e-08	1.56717e-08	3.9025e-08	2.44774e-08	9.90202e-08	5.10658e-08	1.38349e-07	1.39212e-07	3.36865e-08	1.01083e-06	4.53313e-08	7.33171e-08
2007	1.11773e-09	1.08172e-09	5.59171e-10	1.23479e-09	3.19294e-08	1.31487e-08	7.62454e-09	3.76025e-08	3.88552e-09	4.0907e-09	5.7434e-09	9.80027e-09	2.62286e-09	7.11779e-09	7.138e-09	2.61551e-08	1.2835e-08	9.21597e-09	2.35285e-08	4.98279e-09	1.09481e-08	2.56451e-07	1.69755e-08	2.14667e-08	3.18803e-05	4.13336e-09	2.7711e-07	1.14801e-07	7.21267e-08	1.06111e-05	2.54029e-08	1.83756e-07	1.58164e-06	3.66062e-08	2.31172e-08	4.80144e-07	3.76019e-08	2.37485e-08	1.56871e-08	3.98618e-08	2.37898e-08	1.03353e-07	4.88464e-08	1.37167e-07	1.45828e-07	3.46924e-08	1.12268e-06	4.53353e-08	7.30679e-08
2008	1.14951e-09	1.07224e-09	5.62739e-10	1.24706e-09	3.15252e-08	1.29336e-08	8.01027e-09	3.76986e-08	3.79927e-09	4.14538e-09	5.85653e-09	9.66381e-09	2.69089e-09	7.10652e-09	6.76006e-09	2.61052e-08	1.23943e-08	9.38994e-09	2.2474e-08	5.05849e-09	1.11357e-08	2.54663e-07	1.6979e-08	2.29994e-08	3.24898e-05	4.29321e-09	2.96357e-07	1.13284e-07	7.29594e-08	1.01727e-05	2.50991e-08	1.77613e-07	1.50828e-06	3.82579e-08	2.26453e-08	3.27029e-07	3.94799e-08	1.98898e-08	1.55746e-08	4.04698e-08	2.40008e-08	9.93215e-08	5.39635e-08	1.37354e-07	1.46266e-07	3.90553e-08	1.51301e-06	4.48278e-08	6.93103e-08
2009	1.15707e-09	1.06231e-09	5.56527e-10	1.24781e-09	3.08934e-08	1.30828e-08	8.32347e-09	3.9538e-08	3.7409e-09	4.1264e-09	5.96247e-09	9.67439e-09	2.65668e-09	7.18798e-09	5.80097e-09	2.57163e-08	1.27117e-08	9.28036e-09	2.44483e-08	5.05547e-09	1.12994e-08	2.54982e-07	1.75963e-08	1.96143e-08	3.17851e-05	4.37098e-09	2.86777e-07	1.1413e-07	7.2666e-08	1.00813e-05	2.51647e-08	1.74341e-07	1.45882e-06	3.85627e-08	2.15355e-08	3.09521e-07	3.89797e-08	2.13136e-08	1.59401e-08	4.07501e-08	2.33322e-08	9.54951e-08	5.28285e-08	1.43688e-07	1.47706e-07	3.84692e-08	1.38907e-06	4.43608e-08	6.50987e-08
2010	1.19242e-09	1.06882e-09	5.78307e-10	1.26459e-09	3.11864e-08	1.3106e-08	8.60776e-09	4.26598e-08	3.84937e-09	4.21052e-09	6.16799e-09	1.00095e-08	2.71607e-09	7.37426e-09	6.21403e-09	2.6049e-08	1.42482e-08	9.42181e-09	2.41586e-08	5.25852e-09	1.13679e-08	2.59716e-07	1.74553e-08	1.98977e-08	3.10575e-05	3.98415e-09	2.83649e-07	1.13682e-07	7.1953e-08	1.09798e-05	2.58415e-08	1.77075e-07	1.47071e-06	3.70207e-08	2.30174e-08	3.73521e-07	3.82034e-08	2.04942e-08	1.54512e-08	4.57205e-08	2.25222e-08	9.95762e-08	5.31276e-08	1.41677e-07	1.35913e-07	3.54097e-08	1.49846e-06	4.45924e-08	6.94649e-08
2011	1.20797e-09	1.05849e-09	5.82688e-10	1.26835e-09	3.13093e-08	1.32408e-08	8.6843e-09	4.30639e-08	3.96884e-09	4.2461e-09	6.13833e-09	1.05698e-08	2.76766e-09	7.74961e-09	5.09019e-09	2.58723e-08	1.4047e-08	9.32364e-09	2.49149e-08	5.03637e-09	1.15214e-08	2.66017e-07	1.82982e-08	1.81681e-08	3.23032e-05	3.95343e-09	2.91721e-07	1.15737e-07	7.40737e-08	1.19114e-05	2.70188e-08	1.7836e-07	1.4447e-06	3.79532e-08	2.3144e-08	2.99621e-07	3.79762e-08	2.12548e-08	1.59206e-08	4.54581e-08	2.20233e-08	9.86783e-08	6.00847e-08	1.54271e-07	1.38847e-07	3.84604e-08	1.45843e-06	4.37375e-08	6.48639e-08
2012	1.2368e-09	1.07816e-09	5.76026e-10	1.29603e-09	3.17845e-08	1.3109e-08	8.79304e-09	4.45339e-08	4.01617e-09	4.24635e-09	6.56223e-09	1.07334e-08	2.70828e-09	7.96264e-09	5.03346e-09	2.53629e-08	1.4162e-08	9.27241e-09	2.33548e-08	4.92821e-09	1.15229e-08	2.73957e-07	1.83055e-08	1.80222e-08	3.01128e-05	3.90842e-09	2.98188e-07	1.16313e-07	7.35599e-08	1.32641e-05	2.74697e-08	1.87763e-07	1.39988e-06	3.77886e-08	2.24287e-08	3.52704e-07	3.74479e-08	2.04536e-08	1.59206e-08	4.46962e-08	2.05688e-08	1.01246e-07	6.1944e-08	1.43001e-07	1.40421e-07	4.20681e-08	1.44044e-06	4.19232e-08	6.54172e-08
2013	1.24712e-09	1.07359e-09	5.86831e-10	1.28814e-09	3.15425e-08	1.30344e-08	9.05505e-09	4.55084e-08	4.03174e-09	4.23248e-09	6.77619e-09	1.0835e-08	2.71699e-09	8.00749e-09	5.18701e-09	2.51005e-08	1.43267e-08	9.19949e-09	2.42186e-08	4.99761e-09	1.14011e-08	2.75117e-07	1.86925e-08	1.78059e-08	3.1888e-05	3.93955e-09	3.06107e-07	1.19533e-07	7.37214e-08	1.41531e-05	2.5713e-08	1.85967e-07	1.43133e-06	3.63608e-08	2.23217e-08	3.52962e-07	3.65845e-08	1.95087e-08	1.61368e-08	3.89907e-08	1.91137e-08	1.01691e-07	5.83222e-08	1.4312e-07	1.46653e-07	4.38622e-08	1.48322e-06	5.32911e-08	6.89085e-08
2014	1.24848e-09	1.0839e-09	5.97757e-10	1.29641e-09	3.11604e-08	1.32693e-08	8.91084e-09	3.98614e-08	4.18281e-09	4.11543e-09	7.32655e-09	1.06039e-08	2.59342e-09	7.52261e-09	5.17092e-09	2.49063e-08	1.40466e-08	9.24475e-09	2.42081e-08	4.73559e-09	1.1002e-08	2.8101e-07	1.94695e-08	1.82786e-08	3.15146e-05	3.94966e-09	3.34575e-07	1.23346e-07	7.20699e-08	1.49004e-05	2.55064e-08	1.88014e-07	1.34167e-06	3.86633e-08	2.25577e-08	2.63962e-07	3.79491e-08	1.98009e-08	1.59796e-08	3.91515e-08	1.93983e-08	1.02024e-07	6.08976e-08	1.43148e-07	1.58278e-07	4.14442e-08	1.49732e-06	5.39827e-08	6.73024e-08
2015	1.27486e-09	1.09179e-09	6.03586e-10	1.29252e-09	3.11342e-08	1.33877e-08	8.86416e-09	3.94905e-08	4.17042e-09	3.91939e-09	6.81618e-09	1.05569e-08	2.52325e-09	7.57735e-09	5.32878e-09	2.6325e-08	1.39609e-08	9.17026e-09	2.469e-08	4.86444e-09	1.07181e-08	2.76903e-07	1.92619e-08	1.71902e-08	3.13585e-05	4.09581e-09	3.31012e-07	1.22059e-07	7.14332e-08	1.71249e-05	2.47506e-08	1.87973e-07	1.18903e-06	3.77548e-08	2.37117e-08	4.06877e-07	3.50098e-08	1.96892e-08	1.58542e-08	3.86097e-08	2.09015e-08	9.98029e-08	6.16974e-08	1.53177e-07	1.57611e-07	4.09892e-08	1.22218e-06	5.3502e-08	6.88633e-08
2016	1.28171e-09	1.09576e-09	6.14789e-10	1.27261e-09	3.11521e-08	1.3596e-08	8.97205e-09	3.83278e-08	4.04152e-09	3.98552e-09	6.40852e-09	1.0609e-08	2.50336e-09	7.69717e-09	5.48214e-09	2.64693e-08	1.42066e-08	9.28971e-09	2.40903e-08	4.75181e-09	1.07562e-08	2.88092e-07	1.90256e-08	1.62884e-08	2.9309e-05	3.99553e-09	3.29392e-07	1.22852e-07	7.02412e-08	1.96779e-05	2.4661e-08	1.80107e-07	1.20531e-06	3.56717e-08	2.36869e-08	3.98366e-07	3.74091e-08	1.96714e-08	1.59157e-08	3.89653e-08	2.10275e-08	1.0567e-07	6.15758e-08	1.53371e-07	1.56924e-07	4.47863e-08	1.4778e-06	5.41106e-08	7.16403e-08
[truncated: 87 more columns]

## Sheet: 3. Weighted RIW GWP
RIW Protein Supply (GWP) per (ALU) per capita	China	United States	India	Russian Federation	Japan	Germany	Islamic Republic of Iran	Saudi Arabia	Indonesia	Canada	Mexico	South Africa	Brazil	Turkey	Australia	United Kingdom	Poland	France	Italy	Kazakhstan	Afghanistan	Albania	Algeria	Angola	Antigua and Barbuda	Argentina	Armenia	Austria	Azerbaijan	Barbados	Belarus	Belgium	Belize	Benin	Bolivia	Botswana	Bulgaria	Burkina Faso	Cameroon	Central African Republic	Chad	Chile	Colombia	Congo	Croatia	Cuba	Cyprus	Czechia	Denmark
2000	1.10857e-09	1.03279e-09	5.57457e-10	1.08648e-09	3.41563e-08	1.26816e-08	8.73597e-09	3.69711e-08	4.07005e-09	4.10271e-09	5.957e-09	8.76007e-09	2.7693e-09	7.00511e-09	6.83905e-09	2.66432e-08	1.13036e-08	1.01407e-08	2.12936e-08	4.64868e-09	1.08433e-08	2.47826e-07	1.56922e-08	2.08498e-08	2.80814e-05	6.0081e-09	2.30067e-07	1.20106e-07	5.83076e-08	8.51211e-06	2.24157e-08	1.77556e-07	1.76549e-06	3.6795e-08	2.83074e-08	2.95122e-07	3.85576e-08	2.95359e-08	1.36643e-08	3.80417e-08	2.78384e-08	7.11589e-08	3.56423e-08	1.39553e-07	1.25517e-07	3.15092e-08	1.37102e-06	4.41212e-08	6.93779e-08
2001	1.09903e-09	1.01896e-09	5.54915e-10	1.11082e-09	3.44725e-08	1.3128e-08	8.26085e-09	3.64048e-08	4.11245e-09	4.06554e-09	6.00118e-09	8.8101e-09	2.7456e-09	6.87264e-09	6.59955e-09	2.82425e-08	1.16218e-08	1.02862e-08	2.15998e-08	4.7564e-09	1.02452e-08	2.54516e-07	1.61649e-08	2.12618e-08	2.73722e-05	5.78467e-09	2.27261e-07	1.22128e-07	5.95234e-08	8.98225e-06	2.43335e-08	1.89099e-07	1.82683e-06	3.48964e-08	2.79415e-08	5.39125e-07	3.85601e-08	2.42957e-08	1.46694e-08	3.86329e-08	2.63349e-08	7.20825e-08	4.14999e-08	1.4379e-07	1.34395e-07	3.05502e-08	1.37871e-06	4.54655e-08	7.44104e-08
2002	1.1061e-09	1.0478e-09	5.36764e-10	1.13863e-09	3.38499e-08	1.33058e-08	8.05168e-09	3.60042e-08	4.20469e-09	4.10668e-09	6.00836e-09	8.66049e-09	2.76568e-09	6.83123e-09	6.99791e-09	2.79094e-08	1.22527e-08	1.02538e-08	2.1632e-08	4.95726e-09	1.10114e-08	2.68472e-07	1.67796e-08	2.19715e-08	2.73802e-05	5.14289e-09	2.30918e-07	1.21343e-07	6.11362e-08	9.66798e-06	2.43551e-08	1.91691e-07	1.75656e-06	3.68838e-08	2.71949e-08	4.29365e-07	3.86712e-08	2.38991e-08	1.45657e-08	3.9454e-08	2.67091e-08	7.7863e-08	4.54561e-08	1.4489e-07	1.40705e-07	2.9287e-08	1.34306e-06	4.56278e-08	7.47246e-08
2003	1.11213e-09	1.06335e-09	5.38692e-10	1.16386e-09	3.40156e-08	1.31246e-08	8.04252e-09	3.58501e-08	3.78111e-09	4.09184e-09	5.85396e-09	8.82088e-09	2.83564e-09	6.96421e-09	7.47632e-09	2.88662e-08	1.27199e-08	1.00369e-08	2.22388e-08	5.09912e-09	1.11208e-08	2.62632e-07	1.73516e-08	2.0784e-08	2.7808e-05	5.11328e-09	2.44327e-07	1.17233e-07	6.30099e-08	9.70533e-06	2.4296e-08	1.88782e-07	1.78056e-06	3.39252e-08	2.58184e-08	4.97524e-07	3.74603e-08	2.35721e-08	1.45098e-08	3.8747e-08	2.65526e-08	8.84173e-08	4.4168e-08	1.52263e-07	1.38756e-07	3.24929e-08	1.13393e-06	4.57226e-08	7.22849e-08
2004	1.12496e-09	1.08598e-09	5.35915e-10	1.17636e-09	3.32145e-08	1.28838e-08	8.06067e-09	3.69649e-08	3.47258e-09	4.15808e-09	5.961e-09	9.28437e-09	2.77948e-09	6.83921e-09	6.2483e-09	2.81079e-08	1.24541e-08	9.84416e-09	2.22367e-08	4.98532e-09	1.12002e-08	2.61206e-07	1.76471e-08	2.06303e-08	2.76694e-05	4.72509e-09	2.61428e-07	1.15457e-07	6.4777e-08	1.01874e-05	2.49106e-08	1.87243e-07	1.75996e-06	3.52049e-08	2.46322e-08	4.38255e-07	3.83291e-08	2.58276e-08	1.40552e-08	3.90927e-08	2.61731e-08	8.96112e-08	4.37677e-08	1.57891e-07	1.40773e-07	3.23788e-08	1.12979e-06	4.73448e-08	7.37259e-08
2005	1.13614e-09	1.09693e-09	5.33332e-10	1.22582e-09	3.3581e-08	1.29079e-08	8.08899e-09	3.79067e-08	3.70318e-09	4.08463e-09	5.92233e-09	9.49394e-09	2.724e-09	6.86893e-09	6.29702e-09	2.86491e-08	1.28843e-08	9.59671e-09	2.26832e-08	4.99294e-09	1.08647e-08	2.89375e-07	1.77462e-08	2.14275e-08	3.30416e-05	4.62882e-09	2.69474e-07	1.17865e-07	7.04238e-08	1.0931e-05	2.54781e-08	1.86596e-07	1.72939e-06	3.4501e-08	2.41374e-08	3.93739e-07	3.88666e-08	2.36513e-08	1.51749e-08	3.94622e-08	2.55548e-08	9.38488e-08	4.86839e-08	1.29721e-07	1.41827e-07	3.35849e-08	1.01178e-06	4.9053e-08	7.85773e-08
2006	1.13518e-09	1.10701e-09	5.58434e-10	1.24198e-09	3.28987e-08	1.32457e-08	7.87857e-09	3.83918e-08	4.05322e-09	4.17654e-09	5.97046e-09	1.00278e-08	2.73409e-09	7.10408e-09	6.84178e-09	2.70657e-08	1.26491e-08	9.59012e-09	2.38225e-08	5.12534e-09	1.08699e-08	2.64927e-07	1.7763e-08	2.20325e-08	3.23958e-05	4.46765e-09	2.8304e-07	1.16749e-07	7.4619e-08	1.06104e-05	2.60279e-08	1.88436e-07	1.6574e-06	3.68545e-08	2.4609e-08	4.51293e-07	4.03519e-08	2.53759e-08	1.62991e-08	4.05871e-08	2.54573e-08	1.02984e-07	5.311e-08	1.43887e-07	1.44784e-07	3.5035e-08	1.0513e-06	4.71459e-08	7.6252e-08
2007	1.16247e-09	1.12502e-09	5.81555e-10	1.28422e-09	3.32075e-08	1.36751e-08	7.92975e-09	3.91078e-08	4.04106e-09	4.25445e-09	5.97331e-09	1.01926e-08	2.72786e-09	7.40271e-09	7.42373e-09	2.72021e-08	1.33488e-08	9.58488e-09	2.44704e-08	5.18225e-09	1.13863e-08	2.66717e-07	1.7655e-08	2.2326e-08	3.31565e-05	4.29882e-09	2.88203e-07	1.19396e-07	7.50139e-08	1.10358e-05	2.64198e-08	1.91112e-07	1.64495e-06	3.80715e-08	2.40426e-08	4.99364e-07	3.91071e-08	2.46991e-08	1.6315e-08	4.14575e-08	2.47421e-08	1.0749e-07	5.08018e-08	1.42658e-07	1.51665e-07	3.60811e-08	1.16762e-06	4.715e-08	7.59928e-08
2008	1.19552e-09	1.11516e-09	5.85265e-10	1.29697e-09	3.27871e-08	1.34513e-08	8.33092e-09	3.92077e-08	3.95135e-09	4.31132e-09	6.09097e-09	1.00507e-08	2.79861e-09	7.39099e-09	7.03066e-09	2.71502e-08	1.28905e-08	9.76582e-09	2.33736e-08	5.26098e-09	1.15815e-08	2.64858e-07	1.76587e-08	2.39201e-08	3.37904e-05	4.46507e-09	3.0822e-07	1.17819e-07	7.58799e-08	1.05799e-05	2.61038e-08	1.84722e-07	1.56866e-06	3.97894e-08	2.35518e-08	3.4012e-07	4.10603e-08	2.0686e-08	1.61981e-08	4.20898e-08	2.49615e-08	1.03297e-07	5.61237e-08	1.42852e-07	1.52121e-07	4.06187e-08	1.57357e-06	4.66223e-08	7.20847e-08
2009	1.20339e-09	1.10483e-09	5.78805e-10	1.29776e-09	3.21301e-08	1.36065e-08	8.65666e-09	4.11207e-08	3.89064e-09	4.29158e-09	6.20115e-09	1.00617e-08	2.76302e-09	7.47571e-09	6.03318e-09	2.67457e-08	1.32205e-08	9.65185e-09	2.54269e-08	5.25784e-09	1.17518e-08	2.65188e-07	1.83006e-08	2.03994e-08	3.30575e-05	4.54595e-09	2.98256e-07	1.18698e-07	7.55748e-08	1.04848e-05	2.6172e-08	1.81319e-07	1.51722e-06	4.01063e-08	2.23976e-08	3.21911e-07	4.05401e-08	2.21667e-08	1.65781e-08	4.23813e-08	2.42662e-08	9.93178e-08	5.49432e-08	1.4944e-07	1.53618e-07	4.00091e-08	1.44467e-06	4.61366e-08	6.77046e-08
2010	1.24016e-09	1.11161e-09	6.01456e-10	1.31521e-09	3.24348e-08	1.36306e-08	8.95233e-09	4.43674e-08	4.00346e-09	4.37906e-09	6.41489e-09	1.04102e-08	2.8248e-09	7.66946e-09	6.46278e-09	2.70917e-08	1.48185e-08	9.79897e-09	2.51257e-08	5.46902e-09	1.18229e-08	2.70113e-07	1.8154e-08	2.06942e-08	3.23007e-05	4.14364e-09	2.95003e-07	1.18233e-07	7.48333e-08	1.14193e-05	2.6876e-08	1.84163e-07	1.52958e-06	3.85026e-08	2.39387e-08	3.88473e-07	3.97326e-08	2.13146e-08	1.60697e-08	4.75507e-08	2.34238e-08	1.03562e-07	5.52543e-08	1.47349e-07	1.41354e-07	3.68272e-08	1.55845e-06	4.63774e-08	7.22456e-08
2011	1.25633e-09	1.10086e-09	6.06013e-10	1.31912e-09	3.25626e-08	1.37708e-08	9.03194e-09	4.47878e-08	4.12771e-09	4.41608e-09	6.38405e-09	1.09929e-08	2.87845e-09	8.05983e-09	5.29395e-09	2.6908e-08	1.46093e-08	9.69687e-09	2.59122e-08	5.23797e-09	1.19826e-08	2.76665e-07	1.90307e-08	1.88954e-08	3.35963e-05	4.11169e-09	3.03399e-07	1.2037e-07	7.70388e-08	1.23883e-05	2.81004e-08	1.855e-07	1.50253e-06	3.94724e-08	2.40705e-08	3.11615e-07	3.94963e-08	2.21056e-08	1.65579e-08	4.72778e-08	2.29049e-08	1.02628e-07	6.24899e-08	1.60446e-07	1.44405e-07	4e-08	1.51681e-06	4.54883e-08	6.74604e-08
2012	1.28631e-09	1.12132e-09	5.99084e-10	1.34791e-09	3.30569e-08	1.36337e-08	9.14502e-09	4.63166e-08	4.17694e-09	4.41633e-09	6.82491e-09	1.11631e-08	2.81669e-09	8.28138e-09	5.23495e-09	2.63781e-08	1.47289e-08	9.64359e-09	2.42897e-08	5.12548e-09	1.19841e-08	2.84924e-07	1.90383e-08	1.87436e-08	3.13182e-05	4.06487e-09	3.10125e-07	1.20968e-07	7.65045e-08	1.37951e-05	2.85693e-08	1.95279e-07	1.45592e-06	3.93013e-08	2.33266e-08	3.66823e-07	3.8947e-08	2.12723e-08	1.65579e-08	4.64854e-08	2.13921e-08	1.05299e-07	6.44236e-08	1.48725e-07	1.46042e-07	4.37521e-08	1.4981e-06	4.36014e-08	6.80359e-08
2013	1.29704e-09	1.11657e-09	6.10322e-10	1.3397e-09	3.28052e-08	1.35561e-08	9.41752e-09	4.73301e-08	4.19313e-09	4.40191e-09	7.04744e-09	1.12687e-08	2.82575e-09	8.32803e-09	5.39464e-09	2.61053e-08	1.49002e-08	9.56775e-09	2.51881e-08	5.19766e-09	1.18575e-08	2.8613e-07	1.94407e-08	1.85187e-08	3.31644e-05	4.09725e-09	3.1836e-07	1.24318e-07	7.66725e-08	1.47196e-05	2.67423e-08	1.93411e-07	1.48863e-06	3.78163e-08	2.32153e-08	3.67091e-07	3.8049e-08	2.02896e-08	1.67828e-08	4.05515e-08	1.98788e-08	1.05762e-07	6.06569e-08	1.48849e-07	1.52524e-07	4.5618e-08	1.54259e-06	5.54243e-08	7.16669e-08
2014	1.29846e-09	1.12728e-09	6.21685e-10	1.3483e-09	3.24078e-08	1.38005e-08	9.26754e-09	4.14571e-08	4.35025e-09	4.28017e-09	7.61983e-09	1.10284e-08	2.69723e-09	7.82373e-09	5.37791e-09	2.59033e-08	1.46089e-08	9.61482e-09	2.51771e-08	4.92516e-09	1.14424e-08	2.92258e-07	2.02488e-08	1.90103e-08	3.27762e-05	4.10776e-09	3.47968e-07	1.28284e-07	7.49549e-08	1.54969e-05	2.65274e-08	1.9554e-07	1.39537e-06	4.0211e-08	2.34607e-08	2.74529e-07	3.94682e-08	2.05936e-08	1.66192e-08	4.07187e-08	2.01748e-08	1.06108e-07	6.33353e-08	1.48878e-07	1.64614e-07	4.31032e-08	1.55726e-06	5.61436e-08	6.99966e-08
2015	1.32589e-09	1.1355e-09	6.27748e-10	1.34426e-09	3.23805e-08	1.39236e-08	9.21899e-09	4.10713e-08	4.33736e-09	4.07628e-09	7.08903e-09	1.09795e-08	2.62426e-09	7.88067e-09	5.5421e-09	2.73788e-08	1.45198e-08	9.53735e-09	2.56783e-08	5.05917e-09	1.11472e-08	2.87987e-07	2.00329e-08	1.78783e-08	3.26137e-05	4.25977e-09	3.44263e-07	1.26946e-07	7.42926e-08	1.78104e-05	2.57413e-08	1.95498e-07	1.23663e-06	3.92661e-08	2.46609e-08	4.23164e-07	3.64113e-08	2.04773e-08	1.64889e-08	4.01553e-08	2.17382e-08	1.03798e-07	6.41671e-08	1.59309e-07	1.6392e-07	4.263e-08	1.2711e-06	5.56437e-08	7.16199e-08
2016	1.33302e-09	1.13962e-09	6.39399e-10	1.32355e-09	3.23991e-08	1.41402e-08	9.3312e-09	3.98621e-08	4.20331e-09	4.14506e-09	6.66506e-09	1.10337e-08	2.60357e-09	8.00529e-09	5.70159e-09	2.75289e-08	1.47753e-08	9.66157e-09	2.50547e-08	4.94202e-09	1.11868e-08	2.99624e-07	1.97872e-08	1.69404e-08	3.04823e-05	4.15547e-09	3.42577e-07	1.27769e-07	7.30529e-08	2.04656e-05	2.56482e-08	1.87317e-07	1.25356e-06	3.70996e-08	2.46351e-08	4.14313e-07	3.89066e-08	2.04589e-08	1.65528e-08	4.0525e-08	2.18693e-08	1.099e-07	6.40407e-08	1.5951e-07	1.63205e-07	4.65791e-08	1.53695e-06	5.62767e-08	7.45081e-08
Cricket eco-potential GWP (RIW weighted) - protein supply	China	United States	India	Russian Federation	Japan	Germany	Islamic Republic of Iran	Saudi Arabia	Indonesia	Canada	Mexico	South Africa	Brazil	Turkey	Australia	United Kingdom	Poland	France	Italy	Kazakhstan	Afghanistan	Albania	Algeria	Angola	Antigua and Barbuda	Argentina	Armenia	Austria	Azerbaijan	Barbados	Belarus	Belgium	Belize	Benin	Bolivia	Botswana	Bulgaria	Burkina Faso	Cameroon	Central African Republic	Chad	Chile	Colombia	Congo	Croatia	Cuba	Cyprus	Czechia	Denmark
2000	2119855279	2275385032	4215573219	2162948203	6.88013e+07	185307945	2.69003e+08	6.35631e+07	5.77389e+08	5.72792e+08	3.94494e+08	2.68263e+08	8.4859e+08	3.3547e+08	3.43615e+08	8.82026e+07	2.07898e+08	2.31739e+08	110361938	5.0552e+08	2.16723e+08	9.48244e+06	1.49756e+08	1.12711e+08	83685.3	3.91139e+08	1.02144e+07	1.9566e+07	4.03035e+07	276077	1.04837e+08	1.32353e+07	1.33108e+06	6.38673e+07	8.30172e+07	7.96281e+06	6.09479e+07	7.95641e+07	1.71981e+08	6.17743e+07	8.44157e+07	3.30247e+07	6.59328e+07	1.68395e+07	1.87225e+07	7.45815e+07	1.71406e+06	5.32623e+07	3.38724e+07
2001	2138258193	2306270688	4234884994	2115553802	6.81703e+07	1.79006e+08	2.84474e+08	6.4552e+07	5.71435e+08	5.78029e+08	3.9159e+08	2.66739e+08	8.55914e+08	3.41935e+08	3.56085e+08	8.32081e+07	2.02206e+08	228461475	1.08798e+08	4.94072e+08	229376781	9.2332e+06	1.45376e+08	110526941	85853.4	4.06246e+08	1.03406e+07	1.92421e+07	3.94803e+07	261627	9.65748e+07	1.24274e+07	1.28638e+06	6.73422e+07	8.41042e+07	4.35892e+06	6.09439e+07	9.67251e+07	1.60198e+08	6.0829e+07	8.9235e+07	3.26015e+07	5.66267e+07	1.63433e+07	1.74857e+07	7.69225e+07	1.70449e+06	5.16876e+07	3.15816e+07
2002	2124590912	2242792112	4378084545	2063878191	6.94242e+07	1.76615e+08	2.91865e+08	6.52702e+07	5.589e+08	5.72239e+08	3.91122e+08	2.71347e+08	8.49702e+08	3.44008e+08	3.35814e+08	8.4201e+07	1.91794e+08	2.29184e+08	1.08635e+08	4.74052e+08	2.13416e+08	8.75325e+06	1.40051e+08	1.06957e+08	85828.6	4.56941e+08	1.01768e+07	1.93665e+07	3.84387e+07	243070	9.64892e+07	1.22593e+07	1.33784e+06	6.37136e+07	8.64132e+07	5.4732e+06	6.07688e+07	9.83302e+07	1.61338e+08	5.9563e+07	8.7985e+07	3.01812e+07	5.16982e+07	1.62193e+07	1.67016e+07	8.02403e+07	1.74974e+06	5.15036e+07	3.14488e+07
2003	2113058844	2210003302	4362415988	2019143696	6.90859e+07	1.79054e+08	2.92197e+08	6.55507e+07	6.2151e+08	5.74313e+08	4.01438e+08	2.66413e+08	8.28736e+08	3.3744e+08	3.14326e+08	8.14101e+07	1.8475e+08	2.34137e+08	1.05671e+08	4.60864e+08	2.11315e+08	8.94789e+06	1.35434e+08	113067937	84507.9	4.59588e+08	9.61826e+06	2.00456e+07	3.72957e+07	242135	9.67239e+07	1.24482e+07	1.31981e+06	6.92701e+07	9.10205e+07	4.72339e+06	6.27331e+07	9.96943e+07	1.61959e+08	6.06498e+07	8.85037e+07	2.65785e+07	5.32059e+07	1.54338e+07	1.69363e+07	7.23236e+07	2.07244e+06	5.13969e+07	3.25102e+07
2004	2088964956	2163948344	4385026925	1997691465	7.07522e+07	1.824e+08	2.91539e+08	6.35737e+07	6.76731e+08	5.65164e+08	3.94229e+08	2.53114e+08	845481395	3.43607e+08	3.76102e+08	8.36064e+07	1.88692e+08	2.3872e+08	1.05681e+08	471384100	2.09818e+08	8.99673e+06	1.33166e+08	1.1391e+08	84931.5	4.97345e+08	8.98909e+06	2.03539e+07	3.62783e+07	230678	9.43372e+07	1.25505e+07	1.33526e+06	6.67521e+07	9.54037e+07	5.36218e+06	6.13111e+07	9.09878e+07	1.67198e+08	6.01135e+07	8.9787e+07	2.62244e+07	5.36926e+07	1.48837e+07	1.66935e+07	7.25784e+07	2.08004e+06	4.96359e+07	3.18748e+07
2005	2068409740	2142351137	4406261757	1917085196	6.99801e+07	1.82059e+08	2.90518e+08	6.19943e+07	6.3459e+08	575327492	3.96803e+08	2.47526e+08	8.627e+08	3.4212e+08	3.73192e+08	8.20272e+07	1.82392e+08	2.44876e+08	103600811	4.70665e+08	216297120	8.12095e+06	1.32423e+08	1.09672e+08	71122.5	5.07689e+08	8.7207e+06	1.99381e+07	3.33694e+07	214985	9.22362e+07	1.25941e+07	1.35886e+06	6.8114e+07	9.73595e+07	5.96842e+06	6.04633e+07	9.93604e+07	154860794	5.95506e+07	9.19593e+07	2.50403e+07	4.82706e+07	1.81157e+07	1.65695e+07	6.9972e+07	2.32264e+06	4.79073e+07	2.99069e+07
2006	2070158412	2122827980	4208198455	1892133339	7.14313e+07	1.77416e+08	2.98277e+08	6.1211e+07	5.79786e+08	5.62667e+08	393604473	2.34348e+08	8.59518e+08	3.30796e+08	3.43478e+08	8.68256e+07	1.85783e+08	2.45044e+08	9.86462e+07	4.58506e+08	216194294	8.87038e+06	1.32298e+08	1.0666e+08	72540.2	5.26004e+08	8.30272e+06	2.01287e+07	3.14933e+07	221481	9.02878e+07	1.24711e+07	1.41788e+06	6.37643e+07	9.54937e+07	5.20726e+06	5.82377e+07	9.26076e+07	1.4418e+08	5.79001e+07	9.23116e+07	2.28191e+07	4.42478e+07	1.63323e+07	1.62311e+07	6.70758e+07	2.23534e+06	4.98452e+07	3.08189e+07
2007	2021560053	2088846910	4040891837	1829907273	7.07671e+07	1.71845e+08	2.96352e+08	6.00904e+07	5.81531e+08	5.52363e+08	3.93417e+08	2.3056e+08	8.61482e+08	3.17451e+08	3.16553e+08	8.63903e+07	1.76045e+08	245177786	9.60345e+07	4.53471e+08	2.06388e+08	8.81083e+06	1.33107e+08	1.05258e+08	70876	5.46662e+08	8.15398e+06	1.96824e+07	3.13275e+07	212943	8.89484e+07	12296459	1.42862e+06	6.17259e+07	9.77432e+07	4.70599e+06	6.00914e+07	9.5145e+07	1.44039e+08	5.66846e+07	9.49798e+07	2.18624e+07	4.62582e+07	1.6473e+07	1.54946e+07	6.51311e+07	2.01264e+06	4.98409e+07	3.0924e+07
2008	1965665814	2107321067	4015274709	1811909223	7.16745e+07	1.74704e+08	2.82082e+08	5.99372e+07	5.94733e+08	5.45077e+08	3.85817e+08	2.33816e+08	8.39704e+08	3.17955e+08	3.3425e+08	8.65555e+07	1.82305e+08	2.40635e+08	1.00541e+08	4.46685e+08	2.0291e+08	8.87269e+06	1.33079e+08	9.82438e+07	69546.4	5.26307e+08	7.62442e+06	1.99459e+07	3.097e+07	222119	9.00252e+07	1.27218e+07	1.4981e+06	5.9061e+07	9.97802e+07	6.90932e+06	5.72329e+07	1.13603e+08	145078775	5.58331e+07	9.41449e+07	2.27499e+07	41871821	1.64506e+07	1.54483e+07	5.78552e+07	1.49342e+06	5.04051e+07	3.26005e+07
2009	1952821566	2127023291	4060090034	1810817931	7.31402e+07	1.72711e+08	271467365	5.71489e+07	6.04013e+08	5.47584e+08	3.78962e+08	2.3356e+08	8.50517e+08	3.14351e+08	3.89513e+08	8.78644e+07	1.77754e+08	2.43477e+08	9.24216e+07	4.46951e+08	1.9997e+08	8.86162e+06	1.28411e+08	1.15199e+08	71088.4	5.16943e+08	7.87913e+06	1.97981e+07	3.1095e+07	224134	8.97905e+07	1.29606e+07	1.54889e+06	5.85942e+07	1.04922e+08	7.30016e+06	5.79674e+07	1.06015e+08	1.41753e+08	5.54489e+07	9.68427e+07	2.36614e+07	4.27714e+07	1.57254e+07	1.52977e+07	5.87366e+07	1.62666e+06	5.09358e+07	3.47096e+07
2010	1894921623	2114058490	3907184708	1786783699	7.24531e+07	1.72406e+08	2.62501e+08	5.29668e+07	5.86993e+08	5.36645e+08	3.66335e+08	2.25741e+08	8.31918e+08	3.0641e+08	3.63621e+08	8.67424e+07	1.58585e+08	2.39821e+08	9.35298e+07	4.29693e+08	1.98766e+08	8.70007e+06	1.29448e+08	113558140	72753.7	5.67135e+08	7.96601e+06	1.9876e+07	3.14031e+07	205792	87438679	1.27604e+07	1.53637e+06	6.10349e+07	9.81672e+07	6.04933e+06	5.91453e+07	1.10253e+08	1.46238e+08	4.9421e+07	1.00325e+08	2.26917e+07	4.25306e+07	1.59486e+07	1.6625e+07	6.38116e+07	1.50791e+06	5.06712e+07	3.25279e+07
2011	1870530963	2134686968	3877805259	1781490048	7.21687e+07	1.70651e+08	2.60188e+08	5.24697e+07	5.69322e+08	5.32147e+08	3.68105e+08	2.13775e+08	8.16413e+08	2.91569e+08	443903157	8.73347e+07	1.60857e+08	2.42346e+08	9.06908e+07	4.48647e+08	1.96118e+08	8.49402e+06	1.23485e+08	1.24369e+08	69948.3	5.71541e+08	7.74558e+06	1.95231e+07	3.05041e+07	189696	8.36288e+07	1.26685e+07	1.56402e+06	5.95352e+07	9.76299e+07	7.54137e+06	5.94992e+07	1.06308e+08	1.41927e+08	49706250	1.02598e+08	2.28982e+07	3.76061e+07	1.46466e+07	1.62736e+07	5.87501e+07	1.5493e+06	5.16616e+07	3.48353e+07
2012	1826931472	2095743127	3922652123	1743439473	71089609	1.72367e+08	2.5697e+08	5.07378e+07	5.62613e+08	532115544	3.44327e+08	2.10515e+08	8.34311e+08	2.83769e+08	4.48906e+08	8.90889e+07	159550095	2.43685e+08	96748895	4.58493e+08	1.96093e+08	8.24782e+06	123435488	1.25376e+08	75036.2	5.78124e+08	7.57759e+06	1.94265e+07	3.07172e+07	170351	8.22561e+07	1.20341e+07	1.6141e+06	5.97945e+07	1.00744e+08	6.40636e+06	6.03384e+07	1.10472e+08	1.41927e+08	5.05535e+07	1.09853e+08	2.23175e+07	3.64773e+07	15800938	1.60913e+07	5.37118e+07	1.56865e+06	5.38974e+07	3.45406e+07
2013	1811821084	2104658969	3850428725	1754119820	7.16351e+07	1.73353e+08	2.49535e+08	4.96513e+07	5.60441e+08	5.33859e+08	3.33454e+08	2.08541e+08	8.31637e+08	2.8218e+08	4.35617e+08	9.00202e+07	1.57716e+08	2.45617e+08	9.32981e+07	4.52126e+08	1.98187e+08	8.21306e+06	120880148	1.26899e+08	70859.1	5.73556e+08	7.38158e+06	1.89031e+07	3.06498e+07	159651	8.78757e+07	1.21503e+07	1.57863e+06	6.21425e+07	1.01227e+08	6.40168e+06	6.17625e+07	1.15823e+08	1.40024e+08	5.79511e+07	1.18216e+08	2.22198e+07	3.87425e+07	1.57878e+07	15407425	5.15148e+07	1.52341e+06	4.24001e+07	3.27906e+07
2014	1809840610	2084655438	3780050043	1742934128	7.25135e+07	1.70284e+08	253573154	5.66851e+07	5.40199e+08	5.49044e+08	3.08406e+08	2.13086e+08	8.71264e+08	3.00368e+08	4.36972e+08	9.07221e+07	160861280	2.44414e+08	9.33387e+07	4.77142e+08	2.05376e+08	8.04083e+06	1.16056e+08	1.23617e+08	71698.4	5.72087e+08	6.7535e+06	1.83188e+07	3.13522e+07	151643	8.85877e+07	1.2018e+07	1.68414e+06	5.84417e+07	1.00168e+08	8.56012e+06	5.95416e+07	1.14113e+08	1.41403e+08	5.7713e+07	1.16482e+08	2.21473e+07	3.71041e+07	1.57847e+07	1.42758e+07	5.45203e+07	1.50906e+06	4.1857e+07	3.35731e+07
2015	1772390832	2069578656	3743540594	1748170194	7.25746e+07	1.68779e+08	2.54909e+08	5.72176e+07	5.41804e+08	5.76506e+08	3.31498e+08	2.14035e+08	8.95491e+08	298197970	4.24027e+08	8.58327e+07	1.61848e+08	246399802	9.15169e+07	4.64503e+08	2.10816e+08	8.16008e+06	1.17307e+08	131444018	72055.5	5.51673e+08	6.82618e+06	1.85119e+07	3.16317e+07	131946	9.12929e+07	1.20206e+07	1.90033e+06	5.98481e+07	9.52925e+07	5.5534e+06	6.45405e+07	1.14761e+08	1.42521e+08	5.85228e+07	1.08105e+08	2.26401e+07	3.66231e+07	1.47513e+07	1.43363e+07	5.51255e+07	1.84879e+06	4.2233e+07	3.28121e+07
2016	1762917069	2062093287	3675325229	1775528369	7.25329e+07	1.66193e+08	2.51843e+08	5.89533e+07	5.59084e+08	5.6694e+08	3.52585e+08	2.12984e+08	9.02608e+08	2.93556e+08	412165889	8.53648e+07	1.5905e+08	2.43232e+08	9.37949e+07	475513966	210068883	7.84315e+06	1.18764e+08	1.38721e+08	77094	5.6552e+08	6.85977e+06	1.83925e+07	3.21685e+07	114827	9.16244e+07	1.25456e+07	1.87467e+06	6.33429e+07	9.53924e+07	5.67204e+06	6.04011e+07	1.14865e+08	1.4197e+08	5.79888e+07	1.07457e+08	2.1383e+07	3.66954e+07	1.47326e+07	1.4399e+07	5.04518e+07	1.529e+06	4.1758e+07	3.15402e+07
Mealworms eco-potential GWP (RIW weighted) - protein supply	China	United States	India	Russian Federation	Japan	Germany	Islamic Republic of Iran	Saudi Arabia	Indonesia	Canada	Mexico	South Africa	Brazil	Turkey	Australia	United Kingdom	Poland	France	Italy	Kazakhstan	Afghanistan	Albania	Algeria	Angola	Antigua and Barbuda	Argentina	Armenia	Austria	Azerbaijan	Barbados	Belarus	Belgium	Belize	Benin	Bolivia	Botswana	Bulgaria	Burkina Faso	Cameroon	Central African Republic	Chad	Chile	Colombia	Congo	Croatia	Cuba	Cyprus	Czechia	Denmark
2000	11041288770	11851367143	21956857958	11265738726	358352261	9.65178e+08	1401103052	3.31069e+08	3007335088	2983392072	2054723938	1397249183	4419887644	1747296564	1789721640	4.59404e+08	1082837069	1207017334	5.74821e+08	2633004286	1128805696	4.93894e+07	7.80007e+08	5.87057e+08	435876	2037250975	5.32018e+07	1.0191e+08	209921352	1.43795e+06	5.46047e+08	6.89361e+07	6.93293e+06	3.32654e+08	432396106	4.14744e+07	3.17448e+08	414410554	8.95765e+08	3.21752e+08	4.3968e+08	172009471	3.43412e+08	8.77085e+07	9.75164e+07	3.88458e+08	8.92768e+06	2.77417e+08	176424973
2001	11137140545	12012235411	22057443541	11018884483	3.55066e+08	9.32355e+08	1481686873	3.3622e+08	2976327306	3010668744	2039600381	1389314709	4458039394	1780974436	1854672993	4.3339e+08	1053191806	1189944023	5.66673e+08	2573377273	1194711404	4.80912e+07	757193843	575680748	447168	2115938425	5.38589e+07	1.00223e+08	2.05633e+08	1.36269e+06	5.03011e+08	6.47282e+07	6.70014e+06	3.50753e+08	4.38057e+08	2.27035e+07	3.17427e+08	5.03794e+08	8.34391e+08	3.16828e+08	4.64782e+08	1.69805e+08	2.94941e+08	8.51242e+07	9.10745e+07	4.00652e+08	8.87784e+06	2.69215e+08	1.64493e+08
2002	11065954368	11681606576	22803299928	10749731515	361596611	919902461	1520179949	3.39961e+08	2911035194	2980510726	2037163231	1413315331	4425681124	1791770846	1749092796	4.38562e+08	9.98962e+08	1193709611	5.65828e+08	2469106815	1111578198	4.55914e+07	7.29457e+08	5.57085e+08	447039	2379984459	5.30059e+07	1.00871e+08	2.00209e+08	1.26603e+06	502565091	6.38527e+07	6.96817e+06	3.31853e+08	4.50084e+08	2.85072e+07	316514835	512153901	8.40331e+08	3.10235e+08	4.58271e+08	1.57199e+08	2.69271e+08	8.44782e+07	8.69907e+07	4.17932e+08	9.11353e+06	2.68257e+08	1.63802e+08
2003	11005889468	11510825712	22721690085	10516731423	3.59835e+08	9.32602e+08	1521910455	3.41422e+08	3237141722	2991315799	2090893298	1387616211	4316479866	1757557266	1637168699	4.24025e+08	9.62273e+08	1219503444	5.5039e+08	2400415973	1100636711	4.66052e+07	7.0541e+08	5.88916e+08	440161	2393767996	5.00968e+07	1.04407e+08	1.94255e+08	1.26116e+06	5.03788e+08	6.48367e+07	6.87426e+06	3.60794e+08	4.74081e+08	2.46018e+07	3.26746e+08	5.19259e+08	8.43565e+08	3.15895e+08	460972569	1.38434e+08	277123528	8.0387e+07	8.82127e+07	3.76698e+08	1.07943e+07	2.67701e+08	1.6933e+08
2004	10880396195	11270947970	22839459386	10404997247	3.68513e+08	9.50034e+08	1518484188	3.31125e+08	3524758486	2943663028	2053348139	1318344868	4403698840	1789680076	1958932405	4.35465e+08	9.82806e+08	1243376235	5.50442e+08	2455209100	1092841596	4.68595e+07	6.93598e+08	5.93302e+08	442366	2590424821	4.68198e+07	1.06014e+08	1.88956e+08	1.20149e+06	4.91356e+08	6.53695e+07	6.95472e+06	3.47679e+08	4.96911e+08	2.7929e+07	3.19339e+08	4.73911e+08	8.70854e+08	3.13102e+08	4.67657e+08	1.3659e+08	2.79658e+08	7.75219e+07	8.69483e+07	3.78026e+08	1.08339e+07	2.58529e+08	1.6602e+08
2005	10773334134	11158458688	22950061237	9985158639	3.64492e+08	9.48258e+08	1513167535	3.22898e+08	3305266756	2996599362	2066755161	1289243223	4493384682	1781935996	1943776269	4.27239e+08	9.49991e+08	1275436931	5.39606e+08	2451462536	1126585851	4.2298e+07	6.89726e+08	5.7123e+08	370442	2644301907	4.54219e+07	1.03848e+08	1.73805e+08	1.11975e+06	4.80413e+08	6.55963e+07	7.07763e+06	354772311	5.07098e+08	3.10866e+07	3.14924e+08	5.1752e+08	8.06594e+08	3.1017e+08	4.78971e+08	1.30423e+08	2.51418e+08	9.43561e+07	8.63024e+07	3.6445e+08	1.20975e+07	2.49526e+08	1.5577e+08
2006	10782442111	11056772118	21918446423	9855196625	3.72051e+08	9.24074e+08	1553580545	3.18818e+08	3019820133	2930655493	2050093085	1220604922	4476808612	1722954121	1789007727	4.52232e+08	9.67655e+08	1276313215	5.138e+08	2388134815	1126050280	4.62015e+07	6.89074e+08	5.55542e+08	377826	2739694911	4.32448e+07	1.0484e+08	164033213	1.15359e+06	4.70265e+08	6.49557e+07	7.38506e+06	3.32117e+08	4.9738e+08	2.71221e+07	3.03331e+08	4.82347e+08	7.50962e+08	3.01573e+08	4.80806e+08	1.18853e+08	2.30465e+08	8.50668e+07	8.45396e+07	3.49365e+08	1.16428e+07	2.59619e+08	1.6052e+08
2007	10529317042	10879781351	21047028122	9531091499	3.68591e+08	895058867	1543553810	3.12981e+08	3028908511	2876990136	2049115546	1200874018	4487038282	1653448616	1648767181	4.49965e+08	9.16934e+08	1277011106	5.00197e+08	2361910259	1074975857	4.58913e+07	6.93287e+08	5.48239e+08	369158	2847295059	4.24701e+07	1.02516e+08	163169676	1.10912e+06	4.63289e+08	6.40462e+07	7.44096e+06	3.215e+08	5.09096e+08	2.45112e+07	3.12987e+08	4.95564e+08	7.50228e+08	2.95242e+08	494703484	1.13871e+08	2.40937e+08	8.57996e+07	8.0704e+07	3.39236e+08	1.04829e+07	2.59597e+08	1.61068e+08
2008	10238191304	10976004198	20913601036	9437348465	3.73317e+08	909946561	1469226336	3.12184e+08	3097674367	2839037606	2009532597	1217831656	4373604720	1656069964	1740945335	450825416	9.49538e+08	1253351069	5.23668e+08	2326561635	1056858286	4.62135e+07	6.93145e+08	5.11704e+08	362233	2741278054	3.97119e+07	103888467	1.61307e+08	1.15691e+06	4.68897e+08	6.62616e+07	7.80286e+06	3.0762e+08	5.19706e+08	3.59873e+07	2.98098e+08	5.91705e+08	7.55644e+08	2.90807e+08	4.90355e+08	118492941	2.1809e+08	8.56831e+07	8.04624e+07	3.01339e+08	7.77847e+06	2.62536e+08	1.698e+08
2009	10171291901	11078623441	21147022132	9431664457	3.80952e+08	8.99569e+08	1413940659	2.97661e+08	3146008184	2852098840	1973828834	1216499794	4429927509	1637302178	2028781857	457642887	9.25833e+08	1268151065	4.81379e+08	2327950177	1041545670	4.61559e+07	6.68829e+08	6.00017e+08	370264	2692504759	4.10385e+07	1.03119e+08	1.61959e+08	1.1674e+06	4.67675e+08	6.75052e+07	8.06741e+06	3.05189e+08	5.46488e+08	3.8023e+07	3.01924e+08	5.52178e+08	7.38322e+08	2.88806e+08	5.04406e+08	1.23241e+08	2.22775e+08	8.19058e+07	7.96781e+07	3.0593e+08	8.47249e+06	2.65299e+08	1.80785e+08
2010	9869719430	11011096135	20350613120	9306481906	3.77373e+08	897979665	1367241777	2.75878e+08	3057358507	2795119180	1908061160	1175772397	4333053117	1595941231	1893921715	4.51799e+08	8.25994e+08	1249111190	4.87151e+08	2238059856	1035275615	4.53144e+07	6.7423e+08	591468780	378939	2953926937	4.1491e+07	1.03524e+08	1.63564e+08	1.07187e+06	4.55425e+08	6.64629e+07	8.00219e+06	3.17901e+08	5.11305e+08	3.1508e+07	3.08059e+08	574254030	7.61684e+08	257409555	5.22545e+08	1.1819e+08	2.21521e+08	8.30682e+07	8.65914e+07	3.32363e+08	7.85398e+06	2.63921e+08	1.69422e+08
2011	9742680420	11118539782	20197589943	9278909868	3.75892e+08	888837444	1355191165	2.73289e+08	2965321721	2771691793	1917278881	1113447743	4252294274	1518642709	2312074316	4.54884e+08	8.37824e+08	1262263356	4.72364e+08	2336782661	1021481528	4.42412e+07	6.43172e+08	6.47778e+08	364326	2976877931	4.03429e+07	1.01687e+08	1.58881e+08	988032	4.35582e+08	6.59839e+07	8.14623e+06	3.1009e+08	5.08506e+08	3.92793e+07	3.09902e+08	553706266	7.39226e+08	2.58896e+08	534384261	1.19265e+08	1.95872e+08	7.62872e+07	8.47614e+07	306000333	8.06955e+06	2.6908e+08	1.8144e+08
2012	9515592008	10915700372	20431175312	9080723042	3.70271e+08	8.97775e+08	1338433415	2.64268e+08	2930373628	2771529472	1793429357	1096469897	4345519175	1478014681	2338133335	4.64021e+08	8.31018e+08	1269237498	5.03918e+08	2388067041	1021350418	4.29589e+07	6.42915e+08	6.53022e+08	390827	3011166361	3.9468e+07	1.01183e+08	1.59991e+08	887274	4.28432e+08	6.26796e+07	8.40706e+06	3.1144e+08	5.24724e+08	3.33676e+07	314273409	5.75395e+08	7.39226e+08	263308524	5.72173e+08	1.16241e+08	1.89993e+08	8.22994e+07	8.38115e+07	2.79758e+08	8.17032e+06	2.80725e+08	1.79905e+08
2013	9436889389	10962138629	20054998978	9136351742	3.73112e+08	9.02912e+08	1299704711	2.58609e+08	2919063083	2780611607	1736800612	1086190091	4331591075	1469734993	2268918088	4.68871e+08	821467928	1279298234	485944281	2354904422	1032259820	4.27778e+07	6.29606e+08	6.60954e+08	369070	2987371681	3.8447e+07	9.84572e+07	1.5964e+08	831542	4.57701e+08	6.3285e+07	8.22233e+06	323669643	5.27239e+08	3.33432e+07	3.21691e+08	6.03263e+08	7.29318e+08	3.01839e+08	6.1573e+08	115731973	2.01791e+08	8.22308e+07	8.02497e+07	2.68315e+08	7.9347e+06	2.20842e+08	1.7079e+08
2014	9426574073	10857950024	19688430865	9078090949	3.77687e+08	8.86927e+08	1320738470	2.95245e+08	2813631104	2859700094	1606334772	1109862297	4537988790	1564470222	2275975502	4.72527e+08	8.37848e+08	1273034889	4.86156e+08	2485200087	1069702415	4.18807e+07	6.0448e+08	6.43862e+08	373442	2979723401	3.51757e+07	9.54135e+07	1.63298e+08	789836	4.6141e+08	6.25957e+07	8.77184e+06	3.04394e+08	521724455	4.45855e+07	310122972	5.94361e+08	7.36497e+08	3.00599e+08	6.06697e+08	1.15355e+08	1.93257e+08	8.22149e+07	7.43559e+07	2.8397e+08	7.85998e+06	218012371	1.74866e+08
2015	9231516501	10779422446	19498271010	9105363051	3.78005e+08	879084820	1327694607	2.98018e+08	2821990444	3002735075	1726610900	1114801545	4664173540	1553167299	2208551080	4.47061e+08	8.42989e+08	1283375990	4.76667e+08	2419370481	1098034789	4.25019e+07	6.10995e+08	6.84628e+08	375302	2873395604	3.55542e+07	9.64193e+07	1.64754e+08	687240	4.755e+08	6.26094e+07	9.89787e+06	3.1172e+08	4.96332e+08	2.89249e+07	3.3616e+08	5.97734e+08	7.4232e+08	3.04817e+08	5.63064e+08	1.17921e+08	1.90752e+08	7.68321e+07	7.46706e+07	2.87122e+08	9.62944e+06	2.19971e+08	1.70902e+08
2016	9182172306	10740434822	19142970556	9247858398	377788528	865615587	1311727882	3.07059e+08	2911993730	2952915306	1836443507	1109330945	4701244497	1528989839	2146770417	4.44624e+08	8.28412e+08	1266874229	4.88532e+08	2476719551	1094146012	4.08511e+07	6.18582e+08	7.22532e+08	401545	2945517023	3.57292e+07	9.57976e+07	1.6755e+08	598075	4.77226e+08	6.53439e+07	9.76422e+06	329922300	4.96853e+08	2.95429e+07	3.146e+08	5.98274e+08	7.39454e+08	3.02035e+08	5.5969e+08	1.11374e+08	1.91129e+08	7.67349e+07	7.49975e+07	2.62779e+08	7.9638e+06	2.17497e+08	1.64278e+08
Cultured Meat eco-potential GWP (RIW weighted) - protein supply	China	United States	India	Russian Federation	Japan	Germany	Islamic Republic of Iran	Saudi Arabia	Indonesia	Canada	Mexico	South Africa	Brazil	Turkey	Australia	United Kingdom	Poland	France	Italy	Kazakhstan	Afghanistan	Albania	Algeria	Angola	Antigua and Barbuda	Argentina	Armenia	Austria	Azerbaijan	Barbados	Belarus	Belgium	Belize	Benin	Bolivia	Botswana	Bulgaria	Burkina Faso	Cameroon	Central African Republic	Chad	Chile	Colombia	Congo	Croatia	Cuba	Cyprus	Czechia	Denmark
2000	27873841749	29918892542	55430303178	28440467863	9.04664e+08	2436602341	3537098391	8.35787e+08	7592046915	7531602534	5187170726	3527369260	11158049690	4411067307	4518169827	1159770878	2733632796	3047127093	1451142079	6647045133	2849681046	1.24684e+08	1969134862	1482031812	1.10037e+06	5143060059	134308424	2.57272e+08	5.29949e+08	3.63012e+06	1378500344	1.7403e+08	1.75022e+07	8.39788e+08	1091588209	1.04703e+08	8.01399e+08	1046183506	2261366945	8.12266e+08	1109977146	4.3424e+08	8.66946e+08	2.21421e+08	2.46181e+08	9.80667e+08	2.2538e+07	7.00343e+08	4.45387e+08
2001	28115820493	30325006063	55684232469	27817281906	8.96367e+08	2353739470	3740533036	8.4879e+08	7513767465	7600462760	5148991158	3507338604	11254364156	4496087423	4682140153	1094097710	2658793039	3004025352	1430571997	6496516154	3016060652	1.21407e+08	1911543280	1453311692	1.12888e+06	5341707297	1.35967e+08	2.53013e+08	5.19124e+08	3.44012e+06	1269855598	1.63407e+08	1.69146e+07	8.85479e+08	1105880184	5.73151e+07	8.01347e+08	1271832054	2106428263	7.99836e+08	1173345692	4.28675e+08	7.44581e+08	214896835	2.29919e+08	1011449222	2.24122e+07	6.79637e+08	4.15265e+08
2002	27936110293	29490330327	57567154230	27137802600	9.12854e+08	2322302782	3837709184	8.58234e+08	7348936886	7524328548	5142838550	3567928409	11172675386	4523343066	4415601911	1107153004	2521888528	3013531615	1428437819	6233284361	2806190058	1.15096e+08	1841520751	1406367042	1.12855e+06	6008294100	1.33814e+08	2.54649e+08	5.05429e+08	3.19612e+06	1268730499	1.61197e+08	1.75912e+07	8.37766e+08	1136241836	7.19668e+07	7.99045e+08	1292937544	2121424741	7.8319e+08	1156908509	3.96851e+08	6.79776e+08	2.13266e+08	219608789	1055074473	2.30072e+07	6.77218e+08	4.13519e+08
2003	27784475862	29059192360	57361129381	26549591583	9.08406e+08	2354363705	3842077865	8.61922e+08	8172196013	7551606061	5278480630	3503050728	10896995741	4436970549	4133048432	1070455657	2429267147	3078648400	1389464999	6059873657	2778568167	1.17655e+08	1780813460	1486723086	1.11119e+06	6043090775	1.2647e+08	2.63578e+08	4.90399e+08	3.18382e+06	1271816529	1.63681e+08	1.73541e+07	9.10828e+08	1196822275	6.21076e+07	8.24874e+08	1310873353	2129588552	7.9748e+08	1163729770	3.49479e+08	6.99601e+08	2.02938e+08	2.22694e+08	9.50978e+08	2.72503e+07	6.75814e+08	4.27475e+08
2004	27467666865	28453618649	57658439136	26267517560	9.30316e+08	2398369952	3833428221	8.35927e+08	8898287356	7431306173	5183697509	3328174545	11117180896	4518064897	4945344061	1099334802	2481103205	3138915495	1389597336	6198199443	2758889323	1.18297e+08	1750994713	1497797374	1.11676e+06	6539552856	1.18197e+08	2.67633e+08	4.77021e+08	3.03317e+06	1240433720	1.65026e+08	1.75573e+07	8.77718e+08	1254457742	7.05069e+07	8.06176e+08	1196392601	2198479896	7.90428e+08	1180603481	3.44823e+08	7.06e+08	1.95705e+08	2.19502e+08	9.54329e+08	2.73503e+07	6.52659e+08	4.1912e+08
2005	27197387642	28169638355	57937654593	25207630878	9.20163e+08	2393887345	3820006276	8.15159e+08	8344178330	7564944469	5217543666	3254707155	11343593683	4498514892	4907082248	1078569770	2398262434	3219853037	1362240451	6188741205	2844077025	1.06782e+08	1741219518	1442074746	935185	6675566088	1.14668e+08	2.62165e+08	4.38772e+08	2.82683e+06	1212808452	1.65599e+08	1.78675e+07	8.95626e+08	1280173642	7.84783e+07	7.95028e+08	1306483425	2036254695	7.83027e+08	1209167345	3.29253e+08	6.34707e+08	2.38203e+08	2.17871e+08	9.20057e+08	3.05403e+07	6.29931e+08	393243378
2006	27220380819	27912929612	55333332882	24879540500	9.39246e+08	2332832933	3922029317	8.0486e+08	7623565532	7398468525	5175480092	3081429093	11301747232	4349614570	4516367547	1141664676	2442855214	3222065224	1297092919	6028869755	2842724972	1.16636e+08	1739574001	1402471124	953827	6916386663	1.09172e+08	2.64671e+08	4.14103e+08	2.91224e+06	1187187998	163981422	1.86437e+07	8.38433e+08	1255640292	6.84699e+07	7.65763e+08	1217690847	1895811888	7.61325e+08	1213799430	3.00047e+08	5.81812e+08	2.14752e+08	2.13421e+08	881975443	2.93923e+07	6.55412e+08	4.05235e+08
2007	26581364101	27466114686	53133428839	24061333930	9.30512e+08	2259584885	3896716725	7.90124e+08	7646509231	7262989804	5173012285	3031618233	11327572134	4174147242	4162328914	1135940374	2314810026	3223827058	1262751288	5962665604	2713787090	115853104	1750210702	1384034134	931944	7188024290	1.07216e+08	2.58803e+08	4.11923e+08	2.79998e+06	1169576843	1.61685e+08	1.87848e+07	8.1163e+08	1285218940	6.18787e+07	7.90138e+08	1251055818	1893959001	7.45342e+08	1248883795	287467656	6.08247e+08	2.16602e+08	2.03738e+08	8.56404e+08	2.64641e+07	6.55355e+08	406617546
2008	25846414321	27709030206	52796590852	23824678723	942443201	2297169014	3709076288	7.88111e+08	7820109308	7167178269	5073084743	3074427954	11041207994	4180764861	4395033567	1138113183	2397117417	3164097061	1322004628	5873427658	2668049105	1.16666e+08	1749850263	1291801150	914461	6920383322	1.00253e+08	2.62267e+08	4.07222e+08	2.92063e+06	1183736182	1.67278e+08	1.96984e+07	7.76589e+08	1312003492	9.08502e+07	7.52552e+08	1493763933	1907631552	7.34145e+08	1237905491	2.99137e+08	5.5057e+08	2.16308e+08	2.03128e+08	7.60734e+08	1.96368e+07	6.62774e+08	4.28662e+08
2009	25677526123	27968093492	53385864697	23810329389	9.61716e+08	2270970744	3569507055	7.51447e+08	7942128504	7200151483	4982950243	3071065657	11183395426	4133385399	5121679688	1155323955	2337274885	3201459795	1215246107	5876933046	2629392255	1.16521e+08	1688466415	1514748381	934736	6797254662	103602154	2.60324e+08	4.08866e+08	2.94712e+06	1180649086	1.70417e+08	2.03663e+07	7.70452e+08	1379614899	9.59894e+07	7.62209e+08	1393979828	1863900979	7.29094e+08	1273377864	3.11123e+08	5.62399e+08	2.06772e+08	2.01148e+08	7.72324e+08	2.13889e+07	6.69751e+08	4.56394e+08
2010	24916203464	27797620144	51375322337	23494304811	952681412	2266958468	3451615269	6.96457e+08	7718331525	7056305772	4816919104	2968248943	10938835075	4028969284	4781223938	1140570579	2085229346	3153393445	1229817563	5650004049	2613563440	1.14397e+08	1702100142	1493168734	956634	7457217512	1.04745e+08	2.61348e+08	4.12918e+08	2.70595e+06	1149725609	1.67786e+08	2.02016e+07	8.02544e+08	1290794607	7.95422e+07	7.77698e+08	1449709929	1922877540	6.49833e+08	1319170649	2.98371e+08	5.59233e+08	2.09707e+08	2.18601e+08	8.39055e+08	1.98275e+07	6.66272e+08	4.27708e+08
2011	24595492238	28068862684	50989013828	23424698930	9.48942e+08	2243878841	3421193382	6.8992e+08	7485983755	6997163104	4840189331	2810909743	10734958584	3833828407	5836854277	1148358150	2115095754	3186596218	1192488007	5899230736	2578740133	1.11687e+08	1623692821	1635321434	919745	7515157523	1.01846e+08	2.56709e+08	401096403	2.4943e+06	1099630266	1.66577e+08	2.05652e+07	7.82825e+08	1283729253	9.9161e+07	782351176	1397836897	1866182633	6.53584e+08	1349058306	301086344	4.9448e+08	1.92588e+08	213981071	7.72501e+08	2.03717e+07	6.79295e+08	4.58047e+08
2012	24022205314	27556792606	51578702381	22924374347	9.34753e+08	2266441559	3378888279	6.67147e+08	7397756953	6996753323	4527529995	2768049006	10970305761	3731262551	5902640526	1171424508	2097914015	3204202507	1272145045	6028698658	2578409143	1.0845e+08	1623045353	1648559330	986646	7601718999	9.96373e+07	2.55438e+08	4.03898e+08	2.23993e+06	1081579720	158235216	2.12237e+07	7.86234e+08	1324670498	8.42368e+07	7.93386e+08	1452589909	1866182633	6.64725e+08	1444455683	293451049	4.79638e+08	2.07766e+08	2.11583e+08	706252531	2.06261e+07	7.08693e+08	4.54172e+08
2013	23823519781	27674026442	50629041538	23064809546	9.41925e+08	2279410929	3281117286	6.52862e+08	7369203372	7019681264	4384570172	2742097533	10935144135	3710360399	5727905959	1183669405	2073803838	3229600934	1226771102	5944979302	2605950037	1.07993e+08	1589445350	1668584227	931721	7541649098	97059883	2.48556e+08	4.03013e+08	2.09924e+06	1155471736	1.59764e+08	2.07573e+07	817107187	1331020830	8.41753e+07	8.12111e+08	1522944204	1841171352	7.61995e+08	1554416338	2.92167e+08	5.09423e+08	2.07593e+08	2.02591e+08	6.77365e+08	2.00312e+07	5.57517e+08	4.31161e+08
2014	23797478664	27411001287	49703636742	22917729601	9.53476e+08	2239056367	3334217217	7.45349e+08	7103039307	7219340923	4055207879	2801858250	11456197190	3949520415	5745722468	1192899342	2115154704	3213789058	1227304434	6273911985	2700474234	1.05728e+08	1526014584	1625436081	942758	7522340938	8.88014e+07	2.40872e+08	4.12248e+08	1.99395e+06	1164834509	1.58024e+08	2.21446e+07	7.68446e+08	1317098502	112556528	7.82908e+08	1500469299	1859294232	7.58864e+08	1531611970	2.91214e+08	4.87879e+08	2.07552e+08	1.87712e+08	716884002	1.98426e+07	5.50374e+08	4.4145e+08
2015	23305053913	27212757645	49223576325	22986578289	9.54278e+08	2219258246	3351778052	7.52351e+08	7124142543	7580434135	4358846144	2814327429	11774751829	3920986073	5575508853	1128609300	2128132755	3239895269	1203349373	6107724500	2771999591	1.07296e+08	1542462548	1728349002	947454	7253915372	8.9757e+07	2.43412e+08	4.15923e+08	1.73494e+06	1200404938	1.58058e+08	2.49873e+07	7.86939e+08	1252994924	7.30213e+07	8.48639e+08	1508984796	1873993349	7.69513e+08	1421459588	2.97694e+08	4.81555e+08	193963270	1.88507e+08	7.24842e+08	2.43096e+07	5.55319e+08	4.31444e+08
2016	23180484008	27114333006	48326616845	23346309190	9.53731e+08	2185255036	3311469898	7.75173e+08	7351356720	7454663641	4636119638	2800516846	11868337824	3859949839	5419542966	1122456625	2091333556	3198236412	1233302932	6252502787	2762182333	1.03129e+08	1561617342	1824038428	1.0137e+06	7435986601	9.01987e+07	2.41842e+08	4.22981e+08	1.50985e+06	1204762848	164961251	2.46499e+07	832892081	1254309035	7.45813e+07	7.94211e+08	1510348454	1866758971	7.62491e+08	1412941923	281164211	482505830	1.93718e+08	189332020	6.63387e+08	2.01047e+07	5.49073e+08	4.1472e+08
Black Soldier Fly eco-potential GWP (RIW weighted) - protein supply	China	United States	India	Russian Federation	Japan	Germany	Islamic Republic of Iran	Saudi Arabia	Indonesia	Canada	Mexico	South Africa	Brazil	Turkey	Australia	United Kingdom	Poland	France	Italy	Kazakhstan	Afghanistan	Albania	Algeria	Angola	Antigua and Barbuda	Argentina	Armenia	Austria	Azerbaijan	Barbados	Belarus	Belgium	Belize	Benin	Bolivia	Botswana	Bulgaria	Burkina Faso	Cameroon	Central African Republic	Chad	Chile	Colombia	Congo	Croatia	Cuba	Cyprus	Czechia	Denmark
2000	13341557264	14320401964	26531203366	13612767628	433008982	1166257237	1692999521	4.00042e+08	3633863232	3604932087	2482791425	1688342762	5340697570	2111316682	2162580315	5.55114e+08	1308428125	1458479278	6.94576e+08	3181546845	1363973549	5.96789e+07	9.42508e+08	7.09361e+08	526683	2461678261	6.42855e+07	1.23141e+08	253654967	1.73752e+06	6.59806e+08	8.32977e+07	8.37729e+06	4.01957e+08	5.22479e+08	5.01149e+07	3.83582e+08	500746086	1082382431	3.88784e+08	5.3128e+08	2.07845e+08	4.14956e+08	1.05981e+08	1.17832e+08	4.69387e+08	1.07876e+07	3.35213e+08	2.1318e+08
2001	13457378158	14514784455	26652744279	13314485417	4.29038e+08	1126595688	1790371638	4.06266e+08	3596395495	3637891399	2464517127	1678755274	5386797601	2152010776	2241063200	5.2368e+08	1272606765	1437849028	6.8473e+08	3109497538	1443609613	5.81102e+07	9.14943e+08	6.95614e+08	540329	2556758930	6.50795e+07	1.21102e+08	2.48474e+08	1.64658e+06	6.07805e+08	7.82132e+07	8.096e+06	4.23826e+08	529319350	2.74333e+07	3.83557e+08	6.08751e+08	1008222460	382834240	5.61611e+08	2.05181e+08	3.56387e+08	102858388	1.10048e+08	4.84121e+08	1.07274e+07	3.25302e+08	1.98763e+08
2002	13371361528	14115274613	27553987413	12989258914	4.36929e+08	1111548807	1836884105	4.10786e+08	3517500859	3601450460	2461572238	1707756025	5347698024	2165056439	2113487128	5.29929e+08	1207078684	1442399113	6.83709e+08	2983504068	1343156989	5.50896e+07	8.81427e+08	6.73145e+08	540172	2875814555	6.40488e+07	121885542	2.41919e+08	1.52979e+06	6.07266e+08	7.71553e+07	8.41987e+06	4.00989e+08	543851675	3.44462e+07	3.82455e+08	6.18853e+08	1015400386	3.74867e+08	5.53744e+08	1.89949e+08	3.25369e+08	1.02078e+08	1.05114e+08	5.05002e+08	1.10122e+07	3.24144e+08	1.97927e+08
2003	13298783107	13908914401	27455375519	12707717136	4.348e+08	1126894472	1838975134	4.12551e+08	3911546247	3614506590	2526496069	1676702921	5215746505	2123715030	1978245511	5.12364e+08	1162746314	1473566661	6.65055e+08	2900502634	1329936026	5.63146e+07	8.5237e+08	7.11606e+08	531861	2892469662	6.05336e+07	1.26159e+08	2.34725e+08	1.5239e+06	6.08743e+08	7.83443e+07	8.30639e+06	4.3596e+08	5.72848e+08	2.97272e+07	3.94818e+08	6.27437e+08	1019307919	3.81707e+08	5.57009e+08	1.67275e+08	3.34858e+08	9.71343e+07	1.0659e+08	4.55177e+08	1.30431e+07	3.23472e+08	2.04607e+08
2004	13147145402	13619062130	27597680091	12572705007	4.45287e+08	1147957656	1834835061	4.00109e+08	4259083171	3556926158	2481129002	1593000049	5321136099	2162530092	2367043322	5.26186e+08	1187557165	1502412950	6.65118e+08	2966710995	1320516928	5.66219e+07	8.38097e+08	7.16907e+08	534526	3130096658	5.65739e+07	1.281e+08	2.28322e+08	1.4518e+06	593722159	7.89881e+07	8.40362e+06	4.20112e+08	6.00435e+08	3.37475e+07	385868552	5.72642e+08	1052282125	3.78331e+08	565084967	1.65046e+08	3.3792e+08	9.36723e+07	1.05062e+08	4.56781e+08	1.3091e+07	3.12389e+08	2.00608e+08
2005	13017778745	13483137582	27731323995	12065400022	4.40428e+08	1145812098	1828410771	390168242	3993863997	3620890896	2497329153	1557835561	5429506491	2153172662	2348729658	5.16247e+08	1147906194	1541152959	6.52024e+08	2962183897	1361291236	5.11101e+07	8.33419e+08	6.90236e+08	447617	3195198137	5.48848e+07	125482818	2.10014e+08	1.35304e+06	5.805e+08	7.92622e+07	8.55214e+06	4.28683e+08	6.12743e+08	3.75629e+07	3.80533e+08	6.25336e+08	9.74635e+08	3.74789e+08	578756797	1.57594e+08	3.03797e+08	114013561	1.04282e+08	4.40377e+08	1.46178e+07	3.0151e+08	1.88222e+08
2006	13028784217	13360266310	26484789428	11908362589	4.49561e+08	1116588967	1877243159	3.85239e+08	3648949327	3541208721	2477195811	1474897614	5409477073	2081902896	2161717671	5.46447e+08	1169250117	1542211802	6.20842e+08	2885662902	1360644089	5.58268e+07	8.32631e+08	6.7128e+08	456540	3310464684	5.22541e+07	1.26682e+08	198206799	1.39392e+06	5.68237e+08	7.84882e+07	8.92361e+06	4.01308e+08	6.01001e+08	3.27725e+07	3.66525e+08	5.82836e+08	9.07413e+08	3.64401e+08	580973902	1.43615e+08	2.78479e+08	1.02789e+08	1.02152e+08	4.22149e+08	1.40684e+07	3.13707e+08	1.93962e+08
2007	12722924759	13146402466	25431825648	11516735561	4.45381e+08	1081529464	1865127520	3.78186e+08	3659931117	3476363081	2476014618	1451056106	5421837924	1997917078	1992260344	5.43707e+08	1107962469	1543055087	6.04404e+08	2853974896	1298929160	5.5452e+07	8.37722e+08	662455173	446066	3440481529	5.1318e+07	1.23874e+08	1.97163e+08	1.34018e+06	5.59807e+08	7.73892e+07	8.99116e+06	388479202	6.15158e+08	2.96177e+07	3.78192e+08	5.98806e+08	9.06526e+08	3.56751e+08	5.97767e+08	1.37594e+08	2.91132e+08	1.03675e+08	9.75174e+07	4.0991e+08	1.26668e+07	3.1368e+08	194623738
2008	12371147826	13262671739	25270601252	11403462729	4.51092e+08	1099518761	1775315156	3.77222e+08	3743023193	3430503773	2428185222	1471546584	5284772370	2001084540	2103642280	5.44747e+08	1147358142	1514465875	6.32765e+08	2811261976	1277037096	5.58413e+07	8.3755e+08	6.18309e+08	437698	3312377649	4.79852e+07	1.25532e+08	1.94913e+08	1.39793e+06	5.66584e+08	8.00661e+07	9.42846e+06	3.71707e+08	6.27978e+08	4.34846e+07	3.60202e+08	7.14976e+08	9.1307e+08	3.51392e+08	5.92512e+08	1.43179e+08	2.63525e+08	1.03534e+08	9.72254e+07	3.64118e+08	9.39898e+06	3.1723e+08	2.05175e+08
2009	12290311047	13386669992	25552651743	11396594552	4.60316e+08	1086979201	1708511629	3.59673e+08	3801426556	3446286098	2385043174	1469937251	5352829073	1978406798	2451444744	5.52985e+08	1118715067	1532349203	5.81666e+08	2812939798	1258534351	5.57717e+07	8.08169e+08	7.2502e+08	447403	3253443251	4.95882e+07	1.24602e+08	1.957e+08	1.41061e+06	5.65107e+08	8.15687e+07	9.74812e+06	3.6877e+08	6.6034e+08	4.59444e+07	3.64824e+08	6.67216e+08	8.92139e+08	3.48974e+08	6.09491e+08	1.48916e+08	2.69187e+08	9.89695e+07	9.62777e+07	3.69666e+08	1.02376e+07	320570117	2.18449e+08
2010	11925910978	13305074496	24590324186	11245332303	455992171	1085058762	1652083813	3.33353e+08	3694308196	3377435676	2305573901	1420724980	5235772516	1928428987	2288488739	5.45924e+08	9.98076e+08	1509342688	5.88641e+08	2704322326	1250958035	5.47549e+07	8.14695e+08	7.14691e+08	457884	3569328382	5.0135e+07	1.25092e+08	1.97639e+08	1.29518e+06	5.50306e+08	8.03093e+07	9.66932e+06	3.8413e+08	6.17827e+08	3.80722e+07	3.72238e+08	6.9389e+08	9.20368e+08	3.11037e+08	6.31409e+08	1.42813e+08	2.67672e+08	1.00374e+08	1.04631e+08	401605768	9.49023e+06	3.18905e+08	2.04718e+08
2011	11772405508	13434902236	24405421182	11212016090	4.54202e+08	1074011912	1637522658	3.30224e+08	3583097079	3349127583	2316711981	1345416022	5138188915	1835026606	2793756465	5.49651e+08	1012371074	1525234889	5.70773e+08	2823612382	1234290180	5.34581e+07	7.77166e+08	7.82732e+08	440228	3597060834	4.87477e+07	1.22871e+08	1.91981e+08	1.19387e+06	5.26328e+08	7.97306e+07	9.84337e+06	3.74692e+08	6.14445e+08	4.74625e+07	3.74465e+08	669061738	8.93231e+08	3.12832e+08	6.45714e+08	1.44112e+08	2.36678e+08	9.21803e+07	102420066	3.6975e+08	9.75071e+06	3.25138e+08	2.1924e+08
2012	11498007010	13189804616	24687670169	10972540343	4.47411e+08	1084811348	1617273710	3.19324e+08	3540868134	3348931445	2167060473	1324901126	5250835670	1785934406	2825244446	5.60692e+08	1004147193	1533661977	6.089e+08	2885581008	1234131755	5.19086e+07	7.76856e+08	789067718	472249	3638492686	4.76905e+07	1.22263e+08	1.93322e+08	1.07212e+06	5.17688e+08	7.57378e+07	1.01585e+07	3.76324e+08	6.34041e+08	4.03192e+07	3.79747e+08	6.95269e+08	8.93231e+08	3.18164e+08	6.91375e+08	140457638	2.29574e+08	9.94451e+07	1.01272e+08	338041260	9.87247e+06	3.39209e+08	2.17385e+08
2013	11402908012	13245917510	24233123765	11039758355	4.50844e+08	1091019017	1570476526	312486141	3527201226	3359905692	2098634073	1312479693	5234005882	1775929783	2741609357	5.66552e+08	9.92607e+08	1545818700	5.87183e+08	2845509510	1247313950	5.16899e+07	7.60773e+08	7.98652e+08	445960	3609740782	4.64568e+07	1.18969e+08	1.92898e+08	1.00478e+06	5.53056e+08	7.64694e+07	9.93531e+06	3.91101e+08	6.37081e+08	4.02897e+07	3.88709e+08	7.28943e+08	8.8126e+08	3.64722e+08	7.44007e+08	1.39843e+08	2.43831e+08	9.93622e+07	9.69684e+07	3.24214e+08	9.58776e+06	2.6685e+08	206371307
2014	11390443671	13120022946	23790187295	10969359896	4.56372e+08	1071703678	1595892318	3.56755e+08	3399804251	3455470947	1940987849	1341083609	5483403121	1890401519	2750137065	5.7097e+08	1012399290	1538250491	5.87438e+08	3002950105	1292557085	5.06059e+07	7.30413e+08	7.78e+08	451243	3600499109	4.2504e+07	1.15291e+08	1.97319e+08	954385	5.57537e+08	7.56365e+07	1.05993e+07	3.67809e+08	6.30417e+08	53874144	3.74732e+08	7.18186e+08	8.89934e+08	3.63223e+08	7.33092e+08	1.39387e+08	2.33519e+08	9.9343e+07	8.98467e+07	3.4313e+08	9.49747e+06	2.63432e+08	2.11296e+08
2015	11154749106	13025135455	23560410804	11002313686	456756592	1062227491	1604297650	3.60106e+08	3409905120	3628304882	2086321504	1347051867	5635876361	1876743819	2668665888	540198432	1018611115	1550745988	5.75972e+08	2923405998	1326792037	5.13564e+07	738285472	8.27258e+08	453490	3472019688	4.29614e+07	1.16507e+08	1.99078e+08	830415	5.74563e+08	7.56531e+07	1.19599e+07	3.76661e+08	5.99734e+08	3.4951e+07	4.06193e+08	7.22262e+08	8.9697e+08	3.6832e+08	6.80369e+08	1.42488e+08	2.30492e+08	9.28387e+07	9.02269e+07	3.46939e+08	1.16356e+07	2.65798e+08	2.06507e+08
2016	11095124870	12978025410	23131089422	11174495564	4.56494e+08	1045952168	1585004524	3.71029e+08	3518659090	3568105995	2219035904	1340441558	5680670434	1847529389	2594014254	5.37254e+08	1000997518	1530806360	5.90309e+08	2992702790	1322093097	4.93618e+07	7.47454e+08	8.73059e+08	485200	3559166402	4.31728e+07	1.15755e+08	2.02456e+08	722674	5.76649e+08	7.89572e+07	1.17984e+07	3.98656e+08	6.00363e+08	3.56977e+07	3.80142e+08	722914357	8.93507e+08	3.64959e+08	6.76292e+08	1.34577e+08	2.30947e+08	9.27213e+07	9.0622e+07	3.17524e+08	9.62293e+06	2.62809e+08	1.98502e+08
Chlorella eco-potential GWP (RIW weighted) - protein supply	China	United States	India	Russian Federation	Japan	Germany	Islamic Republic of Iran	Saudi Arabia	Indonesia	Canada	Mexico	South Africa	Brazil	Turkey	Australia	United Kingdom	Poland	France	Italy	Kazakhstan	Afghanistan	Albania	Algeria	Angola	Antigua and Barbuda	Argentina	Armenia	Austria	Azerbaijan	Barbados	Belarus	Belgium	Belize	Benin	Bolivia	Botswana	Bulgaria	Burkina Faso	Cameroon	Central African Republic	Chad	Chile	Colombia	Congo	Croatia	Cuba	Cyprus	Czechia	Denmark
2000	115554664337	124032690441	229793586961	117903687162	3750402339	10101254366	14663504979	3464865313	31473825558	31223245455	21504096118	14623171594	46257157454	18286657672	18730665207	4807982183	11332633047	12632264743	6015899685	27556196814	11813726277	5.16894e+08	8163306662	6143957123	4.56174e+06	21321229567	5.56793e+08	1066554374	2196971012	1.50491e+07	5714753853	7.21463e+08	7.25579e+07	3481449696	4525321992	4.34058e+08	3322306440	4337090847	9374793062	3367356185	4601555743	1800197160	3594039135	9.1793e+08	1020576166	4065484736	9.34343e+07	2903363038	1846408418
2001	116557818938	125716287270	230846284118	115320188095	3716005769	9757735473	15506869965	3518771284	31149307838	31508714550	21345817711	14540131883	46656441693	18639119706	19410425684	4535725457	11022375026	12453580829	5930623717	26932159203	12503474741	5.03308e+08	7924553210	6024894103	4.67992e+06	22144747728	5.6367e+08	1048898422	2152095232	1.42615e+07	5264352818	6.77425e+08	7.01216e+07	3670867283	4584571247	2.37607e+08	3322089423	5272546478	8732474451	3315825974	4864258354	1777129307	3086757860	8.90883e+08	9.53157e+08	4193095319	9.29126e+07	2817522735	1721534274
2002	115812806747	122256029608	238652183068	112503317574	3784356688	9627410560	15909726425	3557921325	30465981069	31193090194	21320311270	14791314861	46317790191	18752111547	18305456467	4589847892	10454819430	12492990287	5921776201	25840897304	11633428686	4.77145e+08	7634265636	5830278903	4.67857e+06	24908170685	554743109	1055682077	2095320269	1.32499e+07	5259688575	6.68262e+08	7.29267e+07	3473069747	4710439457	2.98348e+08	3312544964	5360042052	8794644313	3246818149	4796115856	1645196660	2818100992	884121830	9.10417e+08	4373949514	9.53793e+07	2807496749	1714295328
2003	115184186340	120468690658	237798080054	110064811707	3765915235	9760323321	15927837364	3573211999	33878909686	31306172697	21882633292	14522355932	45174924092	18394042954	17134093984	4437714229	10070845355	12762940453	5760209269	25122000502	11518918519	4.87755e+08	7382595605	6163405416	4.60658e+06	25052424862	5.24297e+08	1092696046	2033013700	1.31989e+07	5272482116	6.7856e+08	7.19438e+07	3775957855	4961583608	2.57475e+08	3419622767	5434397298	8828488464	3306058504	4824394289	1448811015	2900287903	8.41305e+08	9.23207e+08	3942404167	1.1297e+08	2801677264	1772153973
2004	113870813120	117958205466	239030616611	108895436875	3856745129	9942756984	15891979129	3465445683	36889016513	30807453746	21489697440	13797383795	46087730510	18730230206	20501571981	4557436509	10285738528	13012785595	5760757888	25695448175	11437337289	4.90417e+08	7258978082	6209315326	4.62967e+06	27110573489	4.90001e+08	1109506722	1977553645	1.25744e+07	5142380566	6.84137e+08	7.27859e+07	3638696944	5200518987	2.92296e+08	3342106931	4959802335	9114086558	3276824450	4894346469	1429509477	2926815771	8.1132e+08	9.09973e+08	3956296735	1.13384e+08	2705684125	1737517399
2005	112750335178	116780927937	240188140887	104501537717	3814657669	9924173752	15836336698	3379347654	34591884923	31361468818	21630011121	13492815099	47026354395	18649183096	20342952620	4471352346	9942311256	13348322785	5647346336	25656237812	11790494074	4.42678e+08	7218453728	5978309871	3.87693e+06	27674434173	4.75371e+08	1086839012	1818986952	1.1719e+07	5027856400	686510765	74072257	3712935706	5307127624	3.25342e+08	3295891403	5416198275	8441560726	3246142573	5012761710	1364962083	2631260856	9.87501e+08	903213598	3814217847	1.26609e+08	2611459708	1630241965
2006	112845656403	115716708198	229391583888	103141396052	3893767127	9671064682	16259286587	3336650943	31604490117	30671320973	21455631060	12774468182	46852874449	18031897296	18723193617	4732920551	10127176470	13357493697	5377268702	24993469760	11784888962	4.8353e+08	7211632023	5814127864	3.95421e+06	28672787427	4.52586e+08	1097226288	1716720146	1.20731e+07	4921643447	6.79806e+08	7.72897e+07	3475834016	5205421404	2.83851e+08	3174571475	5048097006	7859336662	3156172609	5031964628	1243883443	2411976008	8.90282e+08	8.84765e+08	3656344798	1.2185e+08	2717094844	1679955622
2007	110196528844	113864378358	220271593341	99749413477	3857560576	9367405299	16154349918	3275563850	31699606230	30109676176	21445400443	12567970732	46959934962	17304474487	17255480060	4709189708	9596348362	13364797609	5234900971	24719011776	11250360070	4.80284e+08	7255727860	5737694906	3.8635e+06	29798896814	4.44479e+08	1072900341	1707682639	1.16077e+07	4848634097	6.70288e+08	7.78748e+07	3364718443	5328043566	2.56526e+08	3275619037	5186415868	7851655277	3089911112	5177411463	1191734846	2521566335	8.97952e+08	8.44623e+08	3550336414	1.0971e+08	2716859003	1685686331
2008	107149698205	114871416485	218875187317	98768328299	3907021814	9523215234	15376461895	3267215982	32419288103	29712476902	21031137721	12745444042	45772774889	17331908697	18220187700	4718197369	9937564439	13117179078	5480543459	24349064173	11060747260	4.83656e+08	7254233615	5355330982	3.79102e+06	28689356104	4.15612e+08	1087264103	1688193546	1.21079e+07	4907333494	693473191	8.16623e+07	3219451804	5439082436	3.76631e+08	3119802266	6192594169	7908336628	3043496138	5131899462	1240109946	2282459689	8.96732e+08	8.42094e+08	3153721316	8.1407e+07	2747614659	1777075399
2009	106449550043	115945397291	221318099276	98708841252	3986919117	9414606873	14797859343	3115223090	32925134672	29849171682	20657473336	12731505199	46362231523	17135490927	21232594433	4789546881	9689479380	13272071191	5037962015	24363596220	10900490222	4.83053e+08	6999758826	6279587950	3.87507e+06	28178910104	4.29496e+08	1079208077	1695008485	1.22177e+07	4894535531	7.06488e+08	8.4431e+07	3194009637	5719374387	3.97936e+08	3159837861	5778926082	7727045807	3022555934	5278954833	1289799447	2331497281	8.572e+08	8.33886e+08	3201769538	8.86705e+07	2776540364	1892041633
2010	103293387175	115238677683	212983132405	97398719943	3949465659	9397973454	14309123495	2887252689	31997354963	29252840435	19969169491	12305265036	45348374533	16702620234	19821190501	4728384827	8644591561	13072805837	5098369897	23422832318	10834869796	4.74246e+08	7056279231	6190126693	3.96585e+06	30914872598	4.34232e+08	1083453598	1711805459	1.12179e+07	4766338204	6.95579e+08	8.37484e+07	3327049551	5351158224	3.29753e+08	3224049961	6009962519	7971540870	2693967647	5468794825	1236937259	2318372129	869366046	9.06239e+08	3478411013	82197317	2762118545	1773118638
2011	101963836753	116363149187	211381639849	97110159643	3933964289	9302293838	14183005575	2860154492	31034126831	29007656753	20065639264	11652994758	44503177819	15893638153	24197444429	4760669222	8768406669	13210452284	4943615329	24456034218	10690505210	4.63015e+08	6731231403	6779439341	3.81292e+06	31155070507	422216639	1064219045	1662797710	1.03404e+07	4558661396	6.90567e+08	8.52559e+07	3245302549	5321867873	4.11085e+08	3243339341	5794916068	7736504700	2709519415	5592698026	1248192902	2049931523	7.98398e+08	8.87087e+08	3202503485	8.44534e+07	2816106177	1898892233
2012	99587200672	114240295562	213826271036	95035998507	3875139963	9395830540	14007624224	2765747148	30668371058	29005957950	18769469007	11475309957	45478840387	15468437955	24470169950	4856293834	8697177517	13283441461	5273844021	24992760454	10689133050	4.49594e+08	6728547240	6834318774	4.09027e+06	31513922452	413059416	1058953479	1674412181	9.28593e+06	4483830490	6.55985e+08	87985650	3259435318	5491595173	3.49215e+08	3289086903	6021901854	7736504700	2755704405	5988180355	1216539786	1988402892	8.61319e+08	8.77145e+08	2927862434	8.5508e+07	2937979795	1882830190
2013	98763523753	114726303792	209889327541	95618191030	3904872616	9449596763	13602301760	2706522966	30549998445	29101008733	18176810327	11367724723	45333073258	15381785344	23745784896	4907056659	8597225619	13388733971	5085740392	24645690892	10803307433	4.47699e+08	6589254023	6917334611	3.86257e+06	31264894804	4.02374e+08	1030422249	1670742805	8.70266e+06	4790159528	6.62321e+08	8.60523e+07	3387424940	5517921307	3.4896e+08	3366712219	6313564808	7632817156	3158949036	6444036662	1211214522	2111879172	8.60602e+08	8.39869e+08	2808105047	8.30421e+07	2311258988	1787435052
2014	98655566888	113635898541	206052940669	95008451840	3952758057	9282301637	13822434481	3089943228	29446580426	29928724022	16811395772	11615470610	47493166993	16373254534	23819645572	4945320575	8768651053	13323183763	5087951392	26009324441	11195169881	438310648	6326293471	6738458316	3.90833e+06	31184850297	3.68138e+08	9.98568e+08	1709028677	8.26617e+06	4828974131	6.55107e+08	9.18033e+07	3185692437	5460204468	4.66618e+08	3245649731	6220392142	7707947931	3145971732	6349498166	1207265842	2022568257	860435412	7.78185e+08	2971936591	8.22601e+07	2281649079	1830090095
2015	96614155542	112814053536	204062787289	95293873103	3956086507	9200225934	13895235224	3118967890	29534066658	31425683259	18070167996	11667163226	48813777001	16254961681	23114002721	4678797778	8822453265	13431410483	4988642547	25320372440	11491687625	4.44811e+08	6394480660	7165097320	3.92779e+06	30072056930	372099608	1009094332	1724262812	7.19244e+06	4976436003	6.55251e+08	1.03588e+08	3262358578	5194454683	3.02719e+08	3518143296	6255694251	7768885049	3190116040	5892847029	1234128333	1996349506	804100158	7.81479e+08	3004926772	1.00779e+08	2302146286	1788608838
2016	96097734675	112406021296	200344324203	96785184700	3953816212	9059261168	13728132488	3213581108	30476012811	30904285190	19219641605	11609909642	49201750007	16001927973	22467425692	4653291058	8669897365	13258708234	5112818950	25920569806	11450988897	4.27535e+08	6473889371	7561790375	4.20244e+06	30826857075	373930526	1002587630	1753523145	6.25927e+06	4994502292	6.83868e+08	1.02189e+08	3452863287	5199902504	309186759	3292504365	6261347474	7738893985	3161007877	5857535934	1165603089	2000291159	8.03083e+08	7.84901e+08	2750159122	8.33467e+07	2276254621	1719277024
House Fly eco-potential GWP (RIW weighted) - protein supply	China	United States	India	Russian Federation	Japan	Germany	Islamic Republic of Iran	Saudi Arabia	Indonesia	Canada	Mexico	South Africa	Brazil	Turkey	Australia	United Kingdom	Poland	France	Italy	Kazakhstan	Afghanistan	Albania	Algeria	Angola	Antigua and Barbuda	Argentina	Armenia	Austria	Azerbaijan	Barbados	Belarus	Belgium	Belize	Benin	Bolivia	Botswana	Bulgaria	Burkina Faso	Cameroon	Central African Republic	Chad	Chile	Colombia	Congo	Croatia	Cuba	Cyprus	Czechia	Denmark
2000	2399495762	2575542206	4771670112	2448273285	7.78772e+07	2.09753e+08	3.04488e+08	7.1948e+07	6.53555e+08	648351545	4.46533e+08	3.03651e+08	9.60531e+08	3.79723e+08	3.88943e+08	9.98379e+07	2.35322e+08	2.62309e+08	1.2492e+08	5.72205e+08	2.45312e+08	1.07333e+07	1.69511e+08	1.27579e+08	94724.6	4.42736e+08	1.15618e+07	2.2147e+07	4.56202e+07	312496	1.18667e+08	1.49812e+07	1.50667e+06	7.22924e+07	9.39684e+07	9.01323e+06	68987784	9.00598e+07	1.94668e+08	6.99232e+07	9.55514e+07	3.73811e+07	7.46303e+07	1.90608e+07	2.11923e+07	8.44199e+07	1.94017e+06	6.02884e+07	3.83407e+07
2001	2420326295	2610502140	4793529397	2394626857	7.7163e+07	2.0262e+08	3.22001e+08	7.30674e+07	6.46816e+08	6.54279e+08	443246488	3.01926e+08	9.68822e+08	387041830	4.03058e+08	9.41845e+07	2.2888e+08	2.58599e+08	1.2315e+08	5.59247e+08	2.59635e+08	1.04512e+07	1.64554e+08	1.25107e+08	97178.8	4.59836e+08	1.17046e+07	2.17804e+07	4.46883e+07	296140	1.09314e+08	1.40667e+07	1.45608e+06	7.62257e+07	9.51987e+07	4.93392e+06	6.89833e+07	1.09485e+08	1.8133e+08	6.88532e+07	1.01006e+08	3.69021e+07	6.40966e+07	1.84992e+07	1.97923e+07	8.70697e+07	1.92933e+06	5.85059e+07	3.57477e+07
2002	2404856096	2538649795	4955619102	2336134463	7.85823e+07	1.99913e+08	3.30366e+08	7.38803e+07	6.32627e+08	6.47725e+08	442716846	3.07142e+08	9.6179e+08	3.89388e+08	3.80113e+08	9.53083e+07	2.17095e+08	2.59417e+08	1.22966e+08	5.36587e+08	2.41568e+08	9.90793e+06	1.58526e+08	1.21066e+08	97150.6	5.17219e+08	1.15193e+07	2.19213e+07	4.35094e+07	275135	109217577	1.38765e+07	1.51432e+06	7.21184e+07	9.78124e+07	6.1952e+06	6.87851e+07	1.11301e+08	1.82621e+08	6.74203e+07	9.95915e+07	3.41626e+07	5.85179e+07	1.83588e+07	1.89048e+07	9.08252e+07	1.98055e+06	5.82977e+07	3.55974e+07
2003	2391802776	2501535653	4937883630	2285498822	7.81993e+07	2.02673e+08	3.30742e+08	7.41978e+07	7.03496e+08	6.50074e+08	4.54393e+08	3.01557e+08	9.38059e+08	3.81953e+08	3.5579e+08	9.21493e+07	209121379	2.65023e+08	1.19611e+08	5.21659e+08	2.39191e+08	1.01282e+07	1.533e+08	1.27983e+08	95655.8	5.20214e+08	1.08871e+07	2.26899e+07	4.22156e+07	274076	1.09483e+08	1.40903e+07	1.49391e+06	7.84079e+07	1.03027e+08	5.34648e+06	7.10086e+07	1.12845e+08	1.83324e+08	6.86504e+07	1.00179e+08	3.00846e+07	6.02246e+07	1.74697e+07	1.91704e+07	8.18641e+07	2.34582e+06	5.81769e+07	3.67988e+07
2004	2364530546	2449405359	4963477285	2261216722	8.00854e+07	2.06462e+08	3.29997e+08	7.19601e+07	7.66001e+08	6.39718e+08	4.46234e+08	2.86503e+08	9.57013e+08	388933742	4.25716e+08	9.46353e+07	2.13584e+08	2.70211e+08	1.19622e+08	5.33567e+08	2.37497e+08	1.01835e+07	1.50733e+08	1.28937e+08	96135.2	5.62952e+08	1.01749e+07	2.30389e+07	4.1064e+07	261108	106781673	1.42061e+07	1.5114e+06	7.55576e+07	1.07989e+08	6.06953e+06	6.93989e+07	102990431	1.89254e+08	6.80433e+07	1.01631e+08	2.96838e+07	6.07754e+07	1.68471e+07	1.88956e+07	8.21526e+07	2.35443e+06	5.61836e+07	3.60796e+07
2005	2341263791	2424959159	4987513308	2169977286	7.92115e+07	2.06076e+08	3.28842e+08	7.01722e+07	7.18301e+08	6.51222e+08	4.49148e+08	2.80179e+08	9.76504e+08	3.87251e+08	422421967	9.28478e+07	2.06452e+08	2.77178e+08	117267301	5.32752e+08	2.4483e+08	9.19222e+06	1.49891e+08	1.2414e+08	80504.6	5.7466e+08	9.8711e+06	2.25682e+07	3.77713e+07	243345	1.04404e+08	1.42554e+07	1.53811e+06	7.70992e+07	1.10203e+08	6.75574e+06	6.84393e+07	1.12468e+08	1.75289e+08	6.74062e+07	1.0409e+08	2.83435e+07	5.46382e+07	2.05055e+07	1.87553e+07	7.92023e+07	2.62903e+06	5.4227e+07	3.3852e+07
2006	2343243138	2402860607	4763322507	2141733907	8.08542e+07	2.0082e+08	3.37625e+08	6.92856e+07	6.56268e+08	636890818	4.45527e+08	2.65262e+08	9.72901e+08	374432840	388787627	9.82792e+07	2.10291e+08	2.77369e+08	1.11659e+08	5.1899e+08	2.44714e+08	1.00405e+07	149749736	120730524	82109.3	5.95391e+08	9.39797e+06	2.27839e+07	3.56477e+07	250698	1.02198e+08	1.41162e+07	1.60492e+06	7.21758e+07	1.08091e+08	5.89417e+06	6.59201e+07	1.04824e+08	1.63199e+08	6.5538e+07	104488883	2.58293e+07	5.00847e+07	1.84867e+07	1.83722e+07	7.59241e+07	2.53021e+06	5.64205e+07	3.48843e+07
2007	2288233932	2364396928	4573945654	2071299296	8.01024e+07	194514427	3.35446e+08	6.80172e+07	6.58243e+08	6.25228e+08	4.45314e+08	2.60974e+08	9.75124e+08	3.59328e+08	3.58311e+08	9.77865e+07	1.99268e+08	2.7752e+08	1.08703e+08	5.13291e+08	2.33614e+08	9.97312e+06	1.50665e+08	1.19143e+08	80225.6	6.18775e+08	9.22962e+06	2.22788e+07	3.54601e+07	241033	1.00682e+08	1.39185e+07	1.61707e+06	6.98685e+07	1.10637e+08	5.32678e+06	6.80183e+07	1.07696e+08	1.6304e+08	6.41621e+07	1.07509e+08	2.47464e+07	5.23604e+07	1.8646e+07	1.75386e+07	7.37228e+07	2.27814e+06	5.64157e+07	3.50033e+07
2008	2224966411	2385308102	4544949245	2050927036	8.11294e+07	1.9775e+08	3.19293e+08	6.78438e+07	6.73187e+08	6.1698e+08	4.36712e+08	2.64659e+08	9.50473e+08	3.59898e+08	3.78343e+08	9.79735e+07	2.06354e+08	272378582	1.13804e+08	5.05609e+08	2.29677e+08	1.00431e+07	1.50634e+08	1.11204e+08	78720.6	5.95735e+08	8.6302e+06	2.25771e+07	3.50554e+07	251420	1.01901e+08	1.44e+07	1.69572e+06	6.6852e+07	1.12943e+08	7.82076e+06	6.47828e+07	1.28589e+08	1.64217e+08	6.31983e+07	1.06564e+08	2.57509e+07	4.73953e+07	1.86207e+07	1.74861e+07	6.54871e+07	1.69042e+06	5.70543e+07	3.6901e+07
2009	2210427815	2407609343	4595676378	2049691786	8.27885e+07	1.95495e+08	3.07278e+08	6.46877e+07	6.83691e+08	6.19819e+08	4.28953e+08	2.6437e+08	9.62713e+08	3.55819e+08	4.40895e+08	9.94551e+07	2.01202e+08	2.75595e+08	1.04613e+08	5.05911e+08	2.26349e+08	1.00306e+07	1.4535e+08	1.30396e+08	80466	5.85136e+08	8.9185e+06	2.24098e+07	3.51969e+07	253700	101635164	1.46702e+07	1.75321e+06	6.63237e+07	1.18763e+08	8.26316e+06	6.56141e+07	119999558	1.60452e+08	6.27635e+07	1.09618e+08	2.67827e+07	4.84136e+07	1.77998e+07	1.73157e+07	6.64848e+07	1.84124e+06	5.76549e+07	3.92883e+07
2010	2144890007	2392934291	4422600564	2022487081	8.20108e+07	1.95149e+08	2.97129e+08	5.99539e+07	6.64426e+08	6.07436e+08	4.1466e+08	2.55519e+08	9.4166e+08	3.4683e+08	4.11588e+08	9.8185e+07	179505180	2.71457e+08	1.05868e+08	4.86376e+08	2.24986e+08	9.84774e+06	146523831	1.28538e+08	82351	6.41948e+08	9.01684e+06	2.24979e+07	3.55457e+07	232939	9.89731e+07	1.44437e+07	1.73904e+06	6.90863e+07	1.11117e+08	6.84733e+06	6.69475e+07	1.24797e+08	165529264	5.59403e+07	113559674	2.5685e+07	4.81411e+07	1.80524e+07	1.88181e+07	7.22293e+07	1.70683e+06	5.73555e+07	3.68189e+07
2011	2117281856	2416283972	4389345527	2016495118	8.16889e+07	1.93162e+08	2.9451e+08	5.93912e+07	6.44424e+08	602344785	4.16664e+08	2.41975e+08	9.2411e+08	3.30032e+08	5.02461e+08	9.88554e+07	1.82076e+08	2.74315e+08	1.02654e+08	5.0783e+08	2.21989e+08	9.61451e+06	139774204	1.40775e+08	79175.5	6.46936e+08	8.76734e+06	2.20985e+07	3.4528e+07	214719	9.46607e+07	1.43396e+07	1.77034e+06	6.73888e+07	1.10509e+08	8.53619e+06	6.7348e+07	1.20332e+08	1.60649e+08	5.62632e+07	1.16133e+08	2.59188e+07	4.25669e+07	1.65787e+07	1.84204e+07	6.65001e+07	1.75368e+06	5.84765e+07	3.94305e+07
2012	2067930943	2372202859	4440108360	1973425106	8.04674e+07	1.95105e+08	2.90869e+08	5.74308e+07	6.3683e+08	6.0231e+08	3.89749e+08	2.38285e+08	9.44369e+08	3.21203e+08	5.08124e+08	1.00841e+08	1.80597e+08	2.75831e+08	1.09512e+08	5.18975e+08	2.2196e+08	9.33584e+06	1.39718e+08	1.41915e+08	84934.6	6.54387e+08	8.57719e+06	2.19892e+07	3.47692e+07	192823	9.31069e+07	1.36215e+07	1.82702e+06	6.76823e+07	1.14033e+08	7.25145e+06	6.8298e+07	1.25045e+08	1.60649e+08	5.72223e+07	1.24345e+08	2.52615e+07	4.12892e+07	1.78853e+07	1.82139e+07	6.07971e+07	1.77558e+06	6.10072e+07	3.9097e+07
2013	2050827269	2382294833	4358357621	1985514349	8.10848e+07	196221135	2.82452e+08	5.6201e+07	6.34372e+08	6.04283e+08	3.77442e+08	2.36051e+08	9.41343e+08	3.19403e+08	4.93082e+08	1.01895e+08	1.78522e+08	2.78017e+08	1.05606e+08	5.11768e+08	224330974	9.29649e+06	1.36826e+08	1.43639e+08	80206.4	6.49216e+08	8.35532e+06	2.13967e+07	3.4693e+07	180711	9.94678e+07	1.37531e+07	1.78688e+06	7.034e+07	1.1458e+08	7.24616e+06	6.99099e+07	1.31101e+08	1.58496e+08	6.55957e+07	1.33811e+08	2.51509e+07	4.38532e+07	1.78704e+07	1.74399e+07	5.83104e+07	1.72437e+06	4.79934e+07	3.71161e+07
2014	2048585542	2359652538	4278694943	1972853098	8.20791e+07	1.92747e+08	2.87023e+08	6.41628e+07	6.11459e+08	621470772	3.49089e+08	2.41196e+08	9.86197e+08	3.39991e+08	4.94616e+08	1.0269e+08	1.82081e+08	2.76656e+08	1.05651e+08	5.40084e+08	2.32468e+08	9.10153e+06	1.31366e+08	1.39924e+08	81156.5	6.47554e+08	7.64439e+06	2.07353e+07	3.5488e+07	171647	1.00274e+08	1.36033e+07	1.9063e+06	6.6151e+07	113381295	9.68933e+06	6.7396e+07	1.29167e+08	1.60056e+08	6.53262e+07	1.31848e+08	2.50689e+07	4.19987e+07	1.7867e+07	1.6159e+07	6.17123e+07	1.70813e+06	4.73785e+07	3.80019e+07
2015	2006195580	2342586904	4237369354	1978779879	8.21482e+07	1.91043e+08	2.88535e+08	6.47655e+07	6.13276e+08	6.52555e+08	3.75228e+08	2.42269e+08	1013619413	3.37535e+08	479962898	9.71554e+07	1.83198e+08	2.78904e+08	1.03589e+08	5.25778e+08	2.38625e+08	9.23652e+06	1.32782e+08	1.48783e+08	81560.7	6.24447e+08	7.72666e+06	2.09539e+07	3.58044e+07	149351	1.03336e+08	1.36063e+07	2.15101e+06	6.7743e+07	1.07863e+08	6.28598e+06	7.30543e+07	1.299e+08	1.61321e+08	6.62428e+07	1.22365e+08	2.56267e+07	4.14543e+07	1.66972e+07	1.62274e+07	6.23974e+07	2.09267e+06	4.78041e+07	3.71405e+07
2016	1995472086	2334114103	4160155366	2009747005	8.21011e+07	1.88116e+08	2.85065e+08	6.67301e+07	6.32835e+08	6.41728e+08	399096383	2.4108e+08	1021675683	3.3228e+08	4.66537e+08	9.66257e+07	1.80031e+08	2.75317e+08	1.06168e+08	5.38241e+08	2.3778e+08	8.87778e+06	1.3443e+08	1.57021e+08	87263.8	6.40121e+08	7.76468e+06	2.08188e+07	3.6412e+07	129974	1.03711e+08	1.42005e+07	2.12196e+06	7.16988e+07	1.07976e+08	6.42027e+06	6.83689e+07	1.30017e+08	1.60698e+08	6.56384e+07	1.21632e+08	2.42038e+07	4.15361e+07	1.6676e+07	1.62985e+07	5.71071e+07	1.7307e+06	4.72665e+07	3.57008e+07
Spirulina eco-potential GWP (RIW weighted) - protein supply	China	United States	India	Russian Federation	Japan	Germany	Islamic Republic of Iran	Saudi Arabia	Indonesia	Canada	Mexico	South Africa	Brazil	Turkey	Australia	United Kingdom	Poland	France	Italy	Kazakhstan	Afghanistan	Albania	Algeria	Angola	Antigua and Barbuda	Argentina	Armenia	Austria	Azerbaijan	Barbados	Belarus	Belgium	Belize	Benin	Bolivia	Botswana	Bulgaria	Burkina Faso	Cameroon	Central African Republic	Chad	Chile	Colombia	Congo	Croatia	Cuba	Cyprus	Czechia	Denmark
2000	101834239321	109305623918	202508961999	103904350068	3305096956	8901878262	12922428392	3053463272	27736769456	27515942072	18950799459	12886884006	40764797073	16115384735	16506672874	4237104673	9987048748	11132368203	5301599652	24284301782	10411019199	4.5552e+08	7194033483	5414452144	4.0201e+06	18789645634	4.90682e+08	939916653	1936112862	1.32623e+07	5036210480	635799901	6.39427e+07	3068078503	3988006242	3.8252e+08	2927831179	3822124791	8261673605	2967531926	4055188352	1586450096	3167299594	8.08939e+08	8.99398e+08	3582767930	8.23404e+07	2558631173	1627174444
2001	102718283996	110789318266	203436666776	101627603700	3274784475	8599147210	13665656131	3100968698	27450783465	27767515891	18811314297	12813704046	41116672153	16425997062	17105721744	3997174448	9713629326	10974900389	5226448957	23734359504	11018870129	443547238	6983628508	5309526115	4.12425e+06	19515383068	4.96742e+08	9.24357e+08	1896565423	1.25681e+07	4639287975	5.9699e+08	6.17957e+07	3235005524	4040220516	2.09395e+08	2927639930	4646508758	7695620927	2922120173	4286698873	1566121213	2720250545	7.85104e+08	8.39984e+08	3695226624	8.18806e+07	2482983150	1517127277
2002	102061731098	107739915554	210315729481	99145195324	3335019723	8484296473	14020679283	3135470245	26848591748	27489367307	18788836372	13035062722	40818230560	16525572775	16131951449	4044870636	9213462650	11009630550	5218651955	22772668983	10252129308	4.20491e+08	6727808334	5138018621	4.12306e+06	21950689997	4.88875e+08	9.30335e+08	1846531656	1.16767e+07	4635177543	5.88916e+08	6.42677e+07	3060693550	4151143718	2.62923e+08	2919228735	4723615513	7750409028	2861306017	4226647299	1449853637	2483492748	7.79145e+08	8.02318e+08	3854607031	8.40544e+07	2474147603	1510747850
2003	101507750163	106164796943	209563038698	96996226336	3318767923	8601427789	14036639813	3148945375	29856285046	27589022918	19284390884	12798038729	39811063082	16210019587	15099671115	3910800619	8875079876	11247528086	5076268730	22139130653	10151215547	4.29841e+08	6506020436	5431591237	4.05962e+06	22077816102	4.62045e+08	9.62954e+08	1791623080	1.16317e+07	4646452038	5.97991e+08	6.34015e+07	3327618128	4372468177	226903752	3013592616	4789142162	7780234681	2913512448	4251568082	1276785913	2555921166	7.41413e+08	8.13589e+08	3474301377	9.95564e+07	2469019097	1561736628
2004	100350320790	103952395122	210649229580	95965697649	3398813097	8762200124	14005039218	3053974732	32508985746	27149519542	18938110414	12159146421	40615487098	16506289523	18067310390	4016307630	9064457630	11467707774	5076752209	22644489809	10079320894	4.32187e+08	6397080685	5472050017	4.07996e+06	23891589705	431820472	9.77769e+08	1742748095	1.10814e+07	4531798143	6.02905e+08	6.41437e+07	3206654942	4583033478	2.5759e+08	2945280651	4370898405	8031922183	2887749509	4313214464	1259776150	2579299238	7.14988e+08	801927330	3486544406	9.99216e+07	2384423739	1531212640
2005	99362883203	102914902067	211669314791	92093509702	3361722906	8745823379	13956003512	2978099584	30484604910	27637753434	19061763898	11890740801	41442663135	16434865571	17927524756	3940444702	8761807320	11763404834	4976806619	22609935102	10390545480	3.90116e+08	6361368005	5268473078	3.4166e+06	24388500185	4.18928e+08	9.57793e+08	1603008876	1.03275e+07	4430872045	6.04998e+08	6.52773e+07	3272078937	4676983899	2.86713e+08	2904552540	4773104007	7439248949	2860710656	4417569629	1202892814	2318837143	8.7025e+08	7.9597e+08	3361335307	1.11576e+08	2301387092	1436674593
2006	99446886428	101977042845	202154690907	90894864951	3431439273	8522767307	14328734292	2940472482	27851919511	27029550544	18908088917	11257687065	41289781394	15890873425	16500088426	4170955511	8924722496	11771486835	4738796751	22025861055	10385605894	4.26118e+08	6355356277	5123785282	3.48471e+06	25268313604	3.98848e+08	966946726	1512884756	1.06396e+07	4337270325	5.99089e+08	6.81127e+07	3063129603	4587353804	2.50148e+08	2797637578	4448709375	6926155470	2781423309	4434492481	1096190491	2125589161	7.84574e+08	7.79712e+08	3222207371	1.07382e+08	2394479601	1480485481
2007	97112303991	100344650061	194117565747	87905630659	3399531721	8255163031	14236257317	2886638587	27935741977	26534592846	18899073036	11075708165	41384130038	15249821427	15206644371	4150042358	8456922456	11777923514	4613333104	21783990940	9914544483	4.23258e+08	6394216379	5056427619	3.40476e+06	26260713984	3.91703e+08	9.45509e+08	1504920321	1.02294e+07	4272929768	5.90701e+08	6.86283e+07	2965207378	4695416379	2.26068e+08	2886687222	4570604897	6919386138	2723029395	4562669633	1050233776	2222167241	7.91333e+08	7.44336e+08	3128785931	9.66839e+07	2394271763	1485535753
2008	94427239893	101232117150	192886962500	87041034986	3443120161	8392472816	13550732110	2879281906	28569972162	26184555172	18533997949	11232109117	40337927847	15273998226	16056807100	4157980491	8757624118	11559706059	4829809142	21457969199	9747445419	4.26229e+08	6392899554	4719463814	3.34089e+06	25282914993	366264365	9.58167e+08	1487745273	1.06702e+07	4324659471	6.11133e+08	7.19661e+07	2837189025	4793271009	3.31912e+08	2749371411	5457314252	6969337408	2682125520	4522561517	1092865042	2011451010	7.90258e+08	7.42108e+08	2779263071	7.17411e+07	2421375635	1566073707
2009	93810224078	102178578455	195039814420	86988611155	3513530828	8296760108	13040830143	2745335946	29015756855	26305019447	18204700740	11219825308	40857395134	15100902192	18711534625	4220858294	8538995528	11696207000	4439777766	21470775779	9606216559	4.25697e+08	6168639920	5533978795	3.41496e+06	24833076984	3.785e+08	9.51068e+08	1493751037	1.0767e+07	4313381078	6.22603e+08	7.4406e+07	2814767743	5040282393	3.50687e+08	2784653366	5092763196	6809572219	2663671658	4652156215	1136654642	2054666105	7.5542e+08	7.34874e+08	2821606270	7.81421e+07	2446866836	1667389383
2010	91028809353	101555771457	187694502866	85834047575	3480524421	8282101665	12610124523	2544433693	28198137407	25779493808	17598122903	10844194925	39963918822	14719428558	17467714252	4166958338	7618172844	11520601490	4493013097	20641713821	9548387598	4.17937e+08	6218449355	5455139753	3.49497e+06	27244183978	3.82673e+08	9.54809e+08	1508553616	9.8859e+06	4200405307	6.1299e+08	7.38045e+07	2932011115	4715786510	2.90599e+08	2841241219	5296367438	7025037071	2374098420	4819455486	1090069065	2043099372	766141553	7.98636e+08	3065400619	7.24376e+07	2434157397	1562586753
2011	89857123583	102546728429	186283164110	85579749587	3466863611	8197782602	12498981260	2520553010	27349278516	25563422098	17683138302	10269372196	39219076847	14006501258	21324352082	4195409434	7727286721	11641904437	4356633368	21552238118	9421164194	4.08038e+08	5931996199	5974480150	3.3602e+06	27455861901	3.72085e+08	9.37859e+08	1465364820	9.11266e+06	4017387080	6.08572e+08	7.5133e+07	2859970373	4689973959	3.62275e+08	2858240267	5106854605	6817908006	2387803644	4928646996	1099988264	1806532160	7.036e+08	7.81758e+08	2822253071	7.44258e+07	2481734788	1673426574
2012	87762678250	100675932599	188437531126	83751864726	3415023813	8280213190	12344423877	2437355156	27026950888	25561925004	16540869291	10112784863	40078893765	13631787360	21564695438	4279680023	7664514987	11706227218	4647652237	22025235970	9419954957	3.96211e+08	5929630741	6022843454	3.60461e+06	27772105430	3.64015e+08	9.33218e+08	1475600243	8.18336e+06	3951441249	578096231	7.75386e+07	2872425082	4839548627	307750500	2898555976	5306889151	6817908006	2428504842	5277171587	1072093493	1752309153	7.5905e+08	7.72997e+08	2580221625	7.53552e+07	2589137698	1659271664
2013	87036800909	101104234466	184968042046	84264930409	3441226148	8327595461	11987227523	2385162979	26922633290	25645689898	16018580154	10017973802	39950434349	13555423477	20926320507	4324415506	7576430915	11799017783	4481883160	21719375837	9520572803	3.94542e+08	5806876555	6096002375	3.40395e+06	27552646170	3.54598e+08	9.08075e+08	1472366552	7.66935e+06	4221398198	5.8368e+08	7.58348e+07	2985217810	4862748917	3.07526e+08	2966964422	5563921399	6726531841	2783870075	5678901630	1067400526	1861124432	7.58418e+08	7.40146e+08	2474683675	7.3182e+07	2036830813	1575203303
2014	86941662342	100143298878	181587169962	83727588823	3483425894	8180164182	12181222705	2723057698	25950230010	26375126111	14815288592	10236303491	41854048570	14429170214	20991411308	4358136141	7727502087	11741250703	4483831637	22921097862	9865907321	3.86268e+08	5575138719	5938365022	3.44427e+06	27482105777	3.24427e+08	8.80003e+08	1506106537	7.28469e+06	4255604134	5.77323e+08	8.0903e+07	2807438090	4811885109	411213801	2860276332	5481811623	6792741936	2772433636	5595588197	1063920694	1782417880	758271301	6.85787e+08	2619062621	7.24929e+07	2010736647	1612793683
2015	85142638713	99419035938	179833318166	83979120489	3486359140	8107833768	12245379426	2748636105	26027328532	27694343350	15924600039	10281858365	43017855470	14324922905	20369553218	4123259026	7774916074	11836627083	4396314263	22313948827	10127217923	3.91996e+08	5635229678	6314346889	3.46143e+06	26501440334	327918226	8.89279e+08	1519531841	6.33844e+06	4385557068	5.77449e+08	9.12885e+07	2875001248	4577689221	266775858	3100415274	5512922124	6846443662	2811336454	5193157698	1087593657	1759312223	7.08625e+08	6.8869e+08	2648135701	8.88127e+07	2028800111	1576237718
2016	84687535265	99059451554	176556368144	85293360662	3484358409	7983606505	12098117694	2832015389	26857432368	27234853670	16937590482	10231402807	43359762360	14101933247	19799747747	4100780855	7640473954	11684430699	4505746536	22842881541	10091351573	3.76772e+08	5705209766	6663938450	3.70346e+06	27166619010	3.29532e+08	8.83545e+08	1545317938	5.51607e+06	4401478249	602669114	9.00557e+07	3042886311	4582490192	2.72475e+08	2901567664	5517904109	6820013599	2785684460	5162039278	1027204783	1762785862	7.07729e+08	6.91705e+08	2423617981	7.34505e+07	2005982702	1515138042
[truncated: 87 more columns]

## Sheet: 4. Weighted RIW WU
RIW Protein Supply (WU) per (ALU) per capita 2000	China	United States	India	Russian Federation	Japan	Germany	Islamic Republic of Iran	Saudi Arabia	Indonesia	Canada	Mexico	South Africa	Brazil	Turkey	Australia	United Kingdom	Poland	France	Italy	Kazakhstan	Afghanistan	Albania	Algeria	Angola	Antigua and Barbuda	Argentina	Armenia	Austria	Azerbaijan	Barbados	Belarus	Belgium	Belize	Benin	Bolivia	Botswana	Bulgaria	Burkina Faso	Cameroon	Central African Republic	Chad	Chile	Colombia	Congo	Croatia	Cuba	Cyprus	Czechia	Denmark
2000	2.28431e-07	2.12817e-07	1.1487e-07	2.2388e-07	7.03826e-06	2.61317e-06	1.80014e-06	7.61828e-06	8.38675e-07	8.45406e-07	1.2275e-06	1.8051e-06	5.70643e-07	1.44347e-06	1.40926e-06	5.4901e-06	2.32923e-06	2.08959e-06	4.38776e-06	9.57908e-07	2.23438e-06	5.10672e-05	3.23353e-06	4.2963e-06	0.00578646	1.23803e-06	4.74077e-05	2.47491e-05	1.20149e-05	0.00175401	4.61898e-06	3.65872e-05	0.000363797	7.58199e-06	5.83302e-06	6.08129e-05	7.94517e-06	6.08618e-06	2.81567e-06	7.83888e-06	5.73639e-06	1.4663e-05	7.34447e-06	2.87564e-05	2.58641e-05	6.49278e-06	0.000282512	9.09163e-06	1.4296e-05
2001	2.26465e-07	2.09967e-07	1.14346e-07	2.28896e-07	7.10341e-06	2.70517e-06	1.70223e-06	7.50157e-06	8.47412e-07	8.37746e-07	1.2366e-06	1.81541e-06	5.65759e-07	1.41618e-06	1.3599e-06	5.81964e-06	2.39479e-06	2.11958e-06	4.45085e-06	9.80104e-07	2.11112e-06	5.24457e-05	3.33095e-06	4.38121e-06	0.00564033	1.19199e-06	4.68294e-05	2.51657e-05	1.22654e-05	0.00185088	5.01416e-06	3.89657e-05	0.000376436	7.19075e-06	5.75764e-06	0.000111092	7.94569e-06	5.00637e-06	3.02278e-06	7.9607e-06	5.42658e-06	1.48533e-05	8.55147e-06	2.96294e-05	2.76935e-05	6.29518e-06	0.000284098	9.36862e-06	1.5333e-05
2002	2.27922e-07	2.1591e-07	1.10606e-07	2.34627e-07	6.97511e-06	2.74179e-06	1.65913e-06	7.41902e-06	8.66419e-07	8.46223e-07	1.23808e-06	1.78458e-06	5.69896e-07	1.40764e-06	1.44199e-06	5.75102e-06	2.5248e-06	2.11289e-06	4.4575e-06	1.02149e-06	2.269e-06	5.53213e-05	3.45761e-06	4.52745e-06	0.00564196	1.05974e-06	4.75829e-05	2.5004e-05	1.25977e-05	0.00199219	5.01861e-06	3.94999e-05	0.000361957	7.60028e-06	5.60379e-06	8.84749e-05	7.96859e-06	4.92465e-06	3.00141e-06	8.1299e-06	5.50368e-06	1.60445e-05	9.3667e-06	2.9856e-05	2.89936e-05	6.03489e-06	0.000276751	9.40208e-06	1.53978e-05
2003	2.29166e-07	2.19113e-07	1.11003e-07	2.39825e-07	7.00927e-06	2.70445e-06	1.65724e-06	7.38728e-06	7.79137e-07	8.43166e-07	1.20627e-06	1.81763e-06	5.84313e-07	1.43505e-06	1.54057e-06	5.94818e-06	2.62106e-06	2.0682e-06	4.58253e-06	1.05072e-06	2.29156e-06	5.4118e-05	3.57548e-06	4.28275e-06	0.00573013	1.05364e-06	5.0346e-05	2.4157e-05	1.29838e-05	0.00199988	5.00643e-06	3.89005e-05	0.000366902	6.99063e-06	5.32014e-06	0.00010252	7.71907e-06	4.85726e-06	2.9899e-06	7.98422e-06	5.47142e-06	1.82193e-05	9.10127e-06	3.13754e-05	2.8592e-05	6.69548e-06	0.000233658	9.42161e-06	1.4895e-05
2004	2.31809e-07	2.23777e-07	1.10431e-07	2.424e-07	6.84419e-06	2.65483e-06	1.66098e-06	7.617e-06	7.1556e-07	8.56816e-07	1.22832e-06	1.91314e-06	5.7274e-07	1.40929e-06	1.28753e-06	5.79192e-06	2.5663e-06	2.02849e-06	4.58209e-06	1.02728e-06	2.30791e-06	5.38242e-05	3.63637e-06	4.25108e-06	0.00570156	9.73654e-07	5.38699e-05	2.3791e-05	1.3348e-05	0.00209921	5.13309e-06	3.85834e-05	0.000362657	7.25433e-06	5.07571e-06	9.03068e-05	7.8981e-06	5.32205e-06	2.89621e-06	8.05545e-06	5.39322e-06	1.84653e-05	9.01878e-06	3.2535e-05	2.90078e-05	6.67197e-06	0.000232804	9.75587e-06	1.5192e-05
2005	2.34113e-07	2.26033e-07	1.09898e-07	2.52593e-07	6.91971e-06	2.6598e-06	1.66682e-06	7.81107e-06	7.63078e-07	8.4168e-07	1.22036e-06	1.95632e-06	5.61309e-07	1.41541e-06	1.29757e-06	5.90343e-06	2.65495e-06	1.9775e-06	4.67411e-06	1.02885e-06	2.23878e-06	5.96287e-05	3.65678e-06	4.41535e-06	0.00680856	9.53816e-07	5.55278e-05	2.42872e-05	1.45115e-05	0.00225244	5.25001e-06	3.845e-05	0.000356359	7.10928e-06	4.97375e-06	8.1134e-05	8.00885e-06	4.87359e-06	3.12695e-06	8.13159e-06	5.26582e-06	1.93385e-05	1.00318e-05	2.67304e-05	2.92249e-05	6.9205e-06	0.000208487	1.01079e-05	1.61916e-05
2006	2.33915e-07	2.28111e-07	1.15071e-07	2.55923e-07	6.77912e-06	2.72941e-06	1.62346e-06	7.91102e-06	8.35207e-07	8.60618e-07	1.23027e-06	2.06633e-06	5.63387e-07	1.46387e-06	1.40982e-06	5.57717e-06	2.60648e-06	1.97614e-06	4.90887e-06	1.05613e-06	2.23984e-06	5.45908e-05	3.66024e-06	4.54003e-06	0.00667549	9.20605e-07	5.83232e-05	2.40573e-05	1.5376e-05	0.00218637	5.36331e-06	3.88291e-05	0.000341524	7.59424e-06	5.07093e-06	9.29935e-05	8.31492e-06	5.22896e-06	3.35859e-06	8.36339e-06	5.24573e-06	2.12209e-05	1.09439e-05	2.96494e-05	2.98342e-05	7.21932e-06	0.00021663	9.7149e-06	1.57125e-05
2007	2.39538e-07	2.31822e-07	1.19835e-07	2.64626e-07	6.84275e-06	2.81789e-06	1.63401e-06	8.05855e-06	8.32701e-07	8.76672e-07	1.23086e-06	2.10028e-06	5.62103e-07	1.5254e-06	1.52973e-06	5.60528e-06	2.75066e-06	1.97506e-06	5.04237e-06	1.06785e-06	2.34626e-06	5.49598e-05	3.638e-06	4.60051e-06	0.00683223	8.85815e-07	5.93871e-05	2.46028e-05	1.54574e-05	0.00227404	5.44407e-06	3.93806e-05	0.000338958	7.84503e-06	4.95422e-06	0.000102899	8.05842e-06	5.08951e-06	3.36188e-06	8.54274e-06	5.09836e-06	2.21495e-05	1.04682e-05	2.93961e-05	3.12522e-05	7.43487e-06	0.0002406	9.71574e-06	1.56591e-05
2008	2.4635e-07	2.2979e-07	1.206e-07	2.67255e-07	6.75612e-06	2.77179e-06	1.71667e-06	8.07914e-06	8.14216e-07	8.88391e-07	1.25511e-06	2.07104e-06	5.76681e-07	1.52299e-06	1.44874e-06	5.59457e-06	2.65621e-06	2.01235e-06	4.81637e-06	1.08408e-06	2.38648e-06	5.45766e-05	3.63874e-06	4.92898e-06	0.00696285	9.20073e-07	6.35119e-05	2.42777e-05	1.56358e-05	0.0021801	5.37895e-06	3.80639e-05	0.000323237	8.19901e-06	4.85308e-06	7.00853e-05	8.46089e-06	4.26256e-06	3.33778e-06	8.67302e-06	5.14357e-06	2.12855e-05	1.15649e-05	2.94361e-05	3.1346e-05	8.36989e-06	0.000324251	9.60699e-06	1.48538e-05
2009	2.4797e-07	2.27662e-07	1.19269e-07	2.67416e-07	6.62073e-06	2.80376e-06	1.78379e-06	8.47333e-06	8.01707e-07	8.84323e-07	1.27781e-06	2.07331e-06	5.69349e-07	1.54045e-06	1.2432e-06	5.51123e-06	2.72422e-06	1.98886e-06	5.23948e-06	1.08343e-06	2.42157e-06	5.46448e-05	3.77103e-06	4.20351e-06	0.00681182	9.3674e-07	6.14587e-05	2.4459e-05	1.5573e-05	0.0021605	5.39302e-06	3.73627e-05	0.000312638	8.26432e-06	4.61524e-06	6.6333e-05	8.35369e-06	4.56768e-06	3.41609e-06	8.73311e-06	5.00029e-06	2.04654e-05	1.13216e-05	3.07936e-05	3.16546e-05	8.24429e-06	0.00029769	9.50691e-06	1.39512e-05
2010	2.55547e-07	2.29058e-07	1.23936e-07	2.71013e-07	6.68351e-06	2.80872e-06	1.84472e-06	9.14236e-06	8.24953e-07	9.0235e-07	1.32185e-06	2.14512e-06	5.82078e-07	1.58037e-06	1.33172e-06	5.58252e-06	3.05351e-06	2.01918e-06	5.1774e-06	1.12695e-06	2.43624e-06	5.56595e-05	3.74083e-06	4.26426e-06	0.0066559	8.53838e-07	6.07885e-05	2.43631e-05	1.54202e-05	0.00235306	5.53807e-06	3.79487e-05	0.000315186	7.93385e-06	4.93282e-06	8.00488e-05	8.18731e-06	4.39209e-06	3.31132e-06	9.7983e-06	4.82671e-06	2.13401e-05	1.13857e-05	3.03627e-05	2.91273e-05	7.58861e-06	0.000321133	9.55654e-06	1.48869e-05
2011	2.58879e-07	2.26844e-07	1.24875e-07	2.71818e-07	6.70985e-06	2.83761e-06	1.86112e-06	9.22898e-06	8.50557e-07	9.09977e-07	1.3155e-06	2.2652e-06	5.93133e-07	1.66081e-06	1.09087e-06	5.54466e-06	3.01039e-06	1.99814e-06	5.33947e-06	1.07934e-06	2.46914e-06	5.70097e-05	3.92147e-06	3.89358e-06	0.00692285	8.47256e-07	6.25184e-05	2.48035e-05	1.58746e-05	0.00255273	5.79036e-06	3.82241e-05	0.000309613	8.1337e-06	4.95997e-06	6.42113e-05	8.13862e-06	4.55508e-06	3.41192e-06	9.74206e-06	4.71978e-06	2.11476e-05	1.28767e-05	3.30616e-05	2.97562e-05	8.2424e-06	0.000312555	9.37333e-06	1.39009e-05
2012	2.65057e-07	2.3106e-07	1.23447e-07	2.77751e-07	6.8117e-06	2.80936e-06	1.88442e-06	9.54401e-06	8.60701e-07	9.1003e-07	1.40634e-06	2.30027e-06	5.80409e-07	1.70646e-06	1.07871e-06	5.43548e-06	3.03504e-06	1.98716e-06	5.00514e-06	1.05616e-06	2.46945e-06	5.87114e-05	3.92303e-06	3.86232e-06	0.00645344	8.37608e-07	6.39044e-05	2.49268e-05	1.57645e-05	0.00284261	5.887e-06	4.02392e-05	0.000300007	8.09843e-06	4.80667e-06	7.55876e-05	8.02542e-06	4.38338e-06	3.41192e-06	9.57879e-06	4.40807e-06	2.16979e-05	1.32751e-05	3.06464e-05	3.00934e-05	9.01556e-06	0.0003087	8.98451e-06	1.40195e-05
2013	2.67268e-07	2.30081e-07	1.25763e-07	2.76059e-07	6.75984e-06	2.79338e-06	1.94058e-06	9.75285e-06	8.64036e-07	9.07058e-07	1.4522e-06	2.32204e-06	5.82275e-07	1.71608e-06	1.11162e-06	5.37925e-06	3.07033e-06	1.97153e-06	5.19026e-06	1.07103e-06	2.44335e-06	5.89599e-05	4.00596e-06	3.81596e-06	0.00683387	8.44279e-07	6.56013e-05	2.5617e-05	1.57991e-05	0.00303313	5.51053e-06	3.98543e-05	0.000306747	7.79244e-06	4.78374e-06	7.56429e-05	7.84038e-06	4.18089e-06	3.45827e-06	8.35604e-06	4.09624e-06	2.17933e-05	1.2499e-05	3.06719e-05	3.14291e-05	9.40004e-06	0.000317867	1.14207e-05	1.47677e-05
2014	2.6756e-07	2.32288e-07	1.28104e-07	2.77831e-07	6.67795e-06	2.84372e-06	1.90967e-06	8.54265e-06	8.96413e-07	8.81972e-07	1.57014e-06	2.27251e-06	5.55792e-07	1.61216e-06	1.10817e-06	5.33763e-06	3.0103e-06	1.98123e-06	5.188e-06	1.01488e-06	2.35783e-06	6.02228e-05	4.17248e-06	3.91726e-06	0.00675386	8.46446e-07	7.17023e-05	2.64342e-05	1.54452e-05	0.00319329	5.46623e-06	4.02931e-05	0.000287531	8.28589e-06	4.83431e-06	5.65694e-05	8.13283e-06	4.24351e-06	3.42456e-06	8.39051e-06	4.15723e-06	2.18645e-05	1.30509e-05	3.06778e-05	3.39203e-05	8.88185e-06	0.000320889	1.1569e-05	1.44235e-05
2015	2.73214e-07	2.33981e-07	1.29354e-07	2.76999e-07	6.67233e-06	2.86909e-06	1.89967e-06	8.46315e-06	8.93758e-07	8.3996e-07	1.46077e-06	2.26244e-06	5.40755e-07	1.62389e-06	1.142e-06	5.64169e-06	2.99195e-06	1.96527e-06	5.29128e-06	1.04249e-06	2.29699e-06	5.93427e-05	4.12798e-06	3.68401e-06	0.00672039	8.77769e-07	7.09388e-05	2.61584e-05	1.53087e-05	0.00367001	5.30426e-06	4.02843e-05	0.00025482	8.09117e-06	5.08163e-06	8.71973e-05	7.50291e-06	4.21956e-06	3.3977e-06	8.2744e-06	4.47938e-06	2.13886e-05	1.32223e-05	3.28271e-05	3.37774e-05	8.78434e-06	0.000261923	1.1466e-05	1.4758e-05
2016	2.74682e-07	2.3483e-07	1.31755e-07	2.72731e-07	6.67616e-06	2.91374e-06	1.92279e-06	8.21398e-06	8.66134e-07	8.54131e-07	1.3734e-06	2.2736e-06	5.36491e-07	1.64957e-06	1.17487e-06	5.67261e-06	3.04459e-06	1.99087e-06	5.16277e-06	1.01835e-06	2.30516e-06	6.17407e-05	4.07735e-06	3.49075e-06	0.00628118	8.56276e-07	7.05915e-05	2.63282e-05	1.50533e-05	0.00421715	5.28507e-06	3.85985e-05	0.000258308	7.64476e-06	5.07631e-06	8.53733e-05	8.01709e-06	4.21575e-06	3.41086e-06	8.3506e-06	4.50638e-06	2.26461e-05	1.31962e-05	3.28687e-05	3.36301e-05	9.5981e-06	0.000316705	1.15964e-05	1.53531e-05
Cricket eco-potential WU (RIW weighted) - protein supply	China	United States	India	Russian Federation	Japan	Germany	Islamic Republic of Iran	Saudi Arabia	Indonesia	Canada	Mexico	South Africa	Brazil	Turkey	Australia	United Kingdom	Poland	France	Italy	Kazakhstan	Afghanistan	Albania	Algeria	Angola	Antigua and Barbuda	Argentina	Armenia	Austria	Azerbaijan	Barbados	Belarus	Belgium	Belize	Benin	Bolivia	Botswana	Bulgaria	Burkina Faso	Cameroon	Central African Republic	Chad	Chile	Colombia	Congo	Croatia	Cuba	Cyprus	Czechia	Denmark
2000	9333220530	10017981182	18560170079	9522948467	3.02916e+08	8.15867e+08	1184354838	2.79853e+08	2542105561	2521866488	1736861705	1181097155	3736138685	1476992814	1512854804	388335324	9.15324e+08	1020293844	4.85897e+08	2225683085	9.54181e+08	4.17489e+07	6.59341e+08	4.96241e+08	368446	1722091779	4.49716e+07	8.61444e+07	1.77447e+08	1.2155e+06	461574254	5.82718e+07	5.86042e+06	2.81193e+08	3.65505e+08	3.50584e+07	2.68339e+08	3.50302e+08	7.57192e+08	2.71978e+08	3.71662e+08	1.454e+08	2.90287e+08	7.41401e+07	8.24308e+07	3.28365e+08	7.54659e+06	2.34501e+08	1.49132e+08
2001	9414244201	10153963408	18645195246	9314282147	3.00138e+08	7.88121e+08	1252472481	2.84207e+08	2515894629	2544923506	1724077736	1174390131	3768388424	1505460777	1567758295	3.66345e+08	8.90265e+08	1005861745	4.7901e+08	2175280268	1009891620	4.06516e+07	6.40057e+08	4.86624e+08	377992	1788606417	4.5527e+07	8.47183e+07	1.73822e+08	1.15188e+06	425195868	5.47148e+07	5.66364e+06	296491830	3.70291e+08	1.91913e+07	2.68321e+08	4.25858e+08	7.05312e+08	2.67816e+08	3.92881e+08	1.43537e+08	2.49314e+08	7.19556e+07	7.69854e+07	3.38672e+08	7.50445e+06	2.27568e+08	1.39046e+08
2002	9354070403	9874482281	19275668943	9086766677	3.05658e+08	7.77595e+08	1285010745	2.87369e+08	2460703093	2519430881	1722017609	1194677898	3741035923	1514587001	1478511171	3.70717e+08	844424030	1009044802	4.78295e+08	2087140269	9.39619e+08	3.85385e+07	616611066	4.70905e+08	377883	2011804987	4.4806e+07	8.52663e+07	1.69237e+08	1.07018e+06	4.24819e+08	5.39748e+07	5.8902e+06	280515945	3.80457e+08	2.40972e+07	2.67551e+08	432924580	7.10334e+08	2.62242e+08	3.87377e+08	1.32881e+08	2.27615e+08	7.14095e+07	7.35334e+07	3.53279e+08	7.70368e+06	226758361	1.38462e+08
2003	9303297438	9730120920	19206684001	8889811295	3.04169e+08	7.8833e+08	1286473545	2.88604e+08	2736361507	2528564428	1767435728	1172954387	3648727911	1485666202	1383901538	358429197	8.13411e+08	1030848374	4.65246e+08	2029075781	9.3037e+08	3.93954e+07	5.96284e+08	4.97811e+08	372068	2023456235	4.23469e+07	8.82558e+07	1.64204e+08	1.06606e+06	4.25852e+08	5.48065e+07	5.81082e+06	3.0498e+08	4.00742e+08	2.0796e+07	2.76199e+08	4.3893e+08	7.13067e+08	2.67027e+08	3.89661e+08	1.17019e+08	2.34253e+08	6.79513e+07	7.45664e+07	3.18424e+08	9.12445e+06	2.26288e+08	1.43135e+08
2004	9197217757	9527351849	19306234595	8795362203	311504975	803065321	1283577316	2.799e+08	2979484456	2488283458	1735698740	1114399202	3722454260	1512819669	1655888956	3.68099e+08	8.30768e+08	1051028086	4.6529e+08	2075392506	9.23781e+08	3.96104e+07	5.863e+08	501519429	373933	2189690589	3.95768e+07	8.96136e+07	1.59725e+08	1.01562e+06	4.15344e+08	5.52569e+07	5.87884e+06	2.93893e+08	4.2004e+08	2.36084e+07	2.69938e+08	4.00598e+08	7.36135e+08	2.64665e+08	3.95311e+08	1.1546e+08	2.36396e+08	6.55294e+07	7.34975e+07	3.19546e+08	9.15792e+06	2.18535e+08	140337330
2005	9106718012	9432264464	19399726531	8440471900	308105618	8.01564e+08	1279083139	2.72946e+08	2793947716	2533030634	1747031719	1089799530	3798265858	1506273585	1643077448	3.61146e+08	803029320	1078129048	4.5613e+08	2072225529	9.52305e+08	3.57546e+07	583026405	4.82861e+08	313135	2235232984	3.83952e+07	8.77828e+07	1.46918e+08	946530	4.06094e+08	5.54487e+07	5.98273e+06	2.9989e+08	428650741	2.62775e+07	266205449	437460255	6.81815e+08	2.62187e+08	4.04875e+08	1.10246e+08	2.12524e+08	7.97593e+07	7.29515e+07	3.0807e+08	1.0226e+07	2.10925e+08	1.31673e+08
2006	9114417000	9346308631	18527700742	8330614784	3.14495e+08	7.81121e+08	1313244327	2.69498e+08	2552659191	2477288167	1732947237	1031779456	3784254078	1456416104	1512251332	3.82273e+08	8.17961e+08	1078869772	4.34316e+08	2018694498	9.51852e+08	3.90542e+07	5.82475e+08	4.69601e+08	319377	2315868856	3.65549e+07	8.86217e+07	1.38658e+08	975130	3.97516e+08	5.49072e+07	6.2426e+06	2.80739e+08	4.20436e+08	2.29263e+07	2.56407e+08	4.07729e+08	6.3479e+08	2.54921e+08	4.06426e+08	1.00467e+08	1.94813e+08	7.19071e+07	7.14615e+07	2.95319e+08	9.84166e+06	2.19457e+08	1.35688e+08
2007	8900449941	9196698029	17791089342	8056648159	3.11571e+08	7.56595e+08	1304768710	2.64564e+08	2560341613	2431924747	1732120922	1015100889	3792901235	1397662980	1393705755	3.80356e+08	7.75086e+08	1079459701	4.22817e+08	1996526834	9.08679e+08	3.8792e+07	5.86037e+08	4.63427e+08	312050	2406823447	3.59001e+07	8.6657e+07	1.37928e+08	937538	3.91619e+08	5.41384e+07	6.28986e+06	2.71765e+08	4.3034e+08	2.07193e+07	2.64568e+08	418900988	6.34169e+08	2.49569e+08	4.18174e+08	9.62551e+07	2.03664e+08	7.25266e+07	6.82193e+07	286756687	8.86119e+06	2.19438e+08	1.36151e+08
2008	8654360850	9278035368	17678303195	7977407011	3.15566e+08	7.69179e+08	1241939567	2.63889e+08	2618469510	2399843408	1698661387	1029435209	3697015648	1399878811	1471624109	3.81084e+08	802645925	1059459830	4.42657e+08	1966646582	8.93364e+08	3.90644e+07	5.85916e+08	4.32544e+08	306196	2317207089	3.35685e+07	8.78171e+07	1.36353e+08	977939	3.9636e+08	5.60111e+07	6.59577e+06	2.60032e+08	4.39309e+08	3.04201e+07	2.51983e+08	5.00169e+08	6.38747e+08	2.4582e+08	4.14498e+08	1.00162e+08	1.84352e+08	7.2428e+07	6.8015e+07	2.54723e+08	6.57515e+06	2.21922e+08	1.43532e+08
2009	8597810669	9364779592	17875614452	7972602309	3.22019e+08	7.60407e+08	1195206489	2.51613e+08	2659326169	2410884091	1668480934	1028309384	3744625399	1384014368	1714932819	3.86846e+08	7.82608e+08	1071970292	4.06911e+08	1967820319	8.8042e+08	3.90156e+07	5.65363e+08	507195270	312985	2275978939	3.46899e+07	87166425	1.36904e+08	986808	3.95326e+08	5.70622e+07	6.8194e+06	2.57977e+08	4.61947e+08	3.21409e+07	2.55217e+08	4.66757e+08	6.24105e+08	244128450	4.26375e+08	1.04176e+08	1.88312e+08	6.92351e+07	6.7352e+07	2.58603e+08	7.16181e+06	2.24258e+08	1.52818e+08
2010	8342890937	9307698643	17202408534	7866785281	3.18994e+08	7.59064e+08	1155731843	2.332e+08	2584390444	2362719086	1612887405	9.93882e+08	3662737308	1349051888	1600935308	3.81906e+08	6.98214e+08	1055875853	4.1179e+08	1891835875	8.7512e+08	3.83043e+07	5.69928e+08	4.9997e+08	320317	2496959558	3.50724e+07	8.75093e+07	1.38261e+08	906054	3.84972e+08	5.61812e+07	6.76427e+06	2.68722e+08	4.32207e+08	2.66338e+07	2.60403e+08	4.85418e+08	6.43852e+08	2.17589e+08	4.41708e+08	99906034	1.87252e+08	7.02177e+07	7.31959e+07	2.80947e+08	6.63899e+06	2.23093e+08	1.43213e+08
2011	8235504641	9398520944	17073057778	7843478590	3.17742e+08	7.51336e+08	1145545440	2.31011e+08	2506591589	2342915875	1620679160	9.41199e+08	3594471718	1283711313	1954400425	3.84514e+08	7.08214e+08	1066993402	399290261	1975286432	8.6346e+08	3.73972e+07	5.43674e+08	5.47568e+08	307966	2516360074	34101964	8.59558e+07	1.34302e+08	835185	3.68198e+08	5.57763e+07	6.88603e+06	2.62119e+08	4.29841e+08	3.32029e+07	261960878	4.68049e+08	6.24869e+08	2.18845e+08	4.51716e+08	1.00815e+08	1.65571e+08	6.44857e+07	7.1649e+07	2.58663e+08	6.82121e+06	2.27454e+08	1.53371e+08
2012	8043546413	9227060439	17270507894	7675950923	312990705	758890686	1131380085	2.23386e+08	2477049905	2342778665	1515988943	9.26848e+08	3673274889	1249368371	1976428159	3.92237e+08	7.02461e+08	1072888656	4.25962e+08	2018637208	863349278	3.63132e+07	5.43457e+08	552000256	330367	2545344142	3.33623e+07	8.55305e+07	1.3524e+08	750014	3.62154e+08	5.29832e+07	7.1065e+06	263260932	4.4355e+08	2.82057e+07	2.65656e+08	4.86382e+08	6.24869e+08	2.22575e+08	4.83659e+08	9.82586e+07	1.60601e+08	6.95678e+07	7.0846e+07	2.3648e+08	6.90639e+06	2.37297e+08	152074081
2013	7977018953	9266314779	16952525388	7722973959	315392178	7.63233e+08	1098642645	2.18603e+08	2467489082	2350455810	1468120567	9.18158e+08	3661501441	1242369536	1917920392	3.96337e+08	694388263	1081393014	4.1077e+08	1990604789	8.72571e+08	3.61602e+07	5.32207e+08	5.58705e+08	311976	2525230459	3.24993e+07	8.3226e+07	134944021	702904	3.86896e+08	5.34949e+07	6.95035e+06	2.73599e+08	4.45676e+08	2.81851e+07	2.71926e+08	5.0994e+08	616494074	2.55145e+08	5.20478e+08	9.78284e+07	1.70574e+08	6.95099e+07	6.78352e+07	2.26807e+08	6.70721e+06	1.86678e+08	1.44369e+08
2014	7968299398	9178243970	16642664726	7673726009	3.1926e+08	7.49721e+08	1116422518	2.49571e+08	2378367248	2417309445	1357837566	9.38169e+08	3835969788	1322449390	1923886036	3.99428e+08	7.08234e+08	1076098597	4.10948e+08	2100743940	9.04221e+08	3.54019e+07	5.10968e+08	5.44258e+08	315671	2518765354	2.97341e+07	8.06532e+07	1.38036e+08	667650	3.90031e+08	5.29123e+07	7.41485e+06	2.57305e+08	4.41015e+08	3.76882e+07	2.62147e+08	502414091	6.22562e+08	2.54097e+08	5.12842e+08	9.75095e+07	1.63361e+08	6.94964e+07	6.28531e+07	2.4004e+08	6.64405e+06	184286235	1.47814e+08
2015	7803416895	9111864472	16481922272	7696779164	3.19529e+08	7.43092e+08	1122302552	2.51916e+08	2385433412	2538217162	1459507185	9.42344e+08	3942633976	1312895009	1866892055	3.77901e+08	7.1258e+08	1084839948	4.02927e+08	2045098060	9.28171e+08	3.59269e+07	5.16475e+08	5.78717e+08	317243	2428886283	3.00541e+07	8.15034e+07	1.39267e+08	580925	401941150	5.29239e+07	8.36669e+06	2.63497e+08	4.1955e+08	2.44503e+07	2.84156e+08	5.05265e+08	6.27484e+08	2.57662e+08	4.75959e+08	9.96792e+07	1.61243e+08	6.49463e+07	6.31192e+07	2.42705e+08	8.13978e+06	1.85942e+08	1.44464e+08
2016	7761706161	9078908166	16181586182	7817230728	3.19345e+08	7.31706e+08	1108805851	2.59557e+08	2461513346	2496104425	1552348879	9.37719e+08	3973970120	1292457760	1814668754	3.75841e+08	7.00258e+08	1070890981	4.12957e+08	2093575328	9.24884e+08	3.45315e+07	5.22889e+08	6.10757e+08	339427	2489850643	3.02019e+07	8.09779e+07	1.4163e+08	505554	4.034e+08	5.52353e+07	8.25371e+06	2.78884e+08	4.1999e+08	2.49727e+07	2.65932e+08	5.05722e+08	6.25062e+08	2.55311e+08	4.73107e+08	9.41445e+07	1.61561e+08	6.48641e+07	6.33955e+07	2.22127e+08	6.73182e+06	1.83851e+08	1.38864e+08
Mealworm ecp-potential WU (RIW weighted) - protein supply	China	United States	India	Russian Federation	Japan	Germany	Islamic Republic of Iran	Saudi Arabia	Indonesia	Canada	Mexico	South Africa	Brazil	Turkey	Australia	United Kingdom	Poland	France	Italy	Kazakhstan	Afghanistan	Albania	Algeria	Angola	Antigua and Barbuda	Argentina	Armenia	Austria	Azerbaijan	Barbados	Belarus	Belgium	Belize	Benin	Bolivia	Botswana	Bulgaria	Burkina Faso	Cameroon	Central African Republic	Chad	Chile	Colombia	Congo	Croatia	Cuba	Cyprus	Czechia	Denmark
2000	100686713034	108073905808	200226975520	102733496592	3267853239	8801566821	12776811099	3019055107	27424215719	27205876744	18737251043	12741667248	40305436090	15933787389	16320666270	4189358561	9874508987	11006922329	5241858204	24010652420	10293701897	4.50387e+08	7112967010	5353439009	3.9748e+06	18577913191	4.85153e+08	9.29325e+08	1914295638	1.31128e+07	4979459588	6.28635e+08	6.32221e+07	3033505644	3943067114	3.78209e+08	2894838707	3779054909	8168576355	2934092084	4009492176	1568573072	3131608656	799823225	8.89263e+08	3542395258	8.14125e+07	2529799058	1608838515
2001	101560795790	109540881043	201144226391	100482405902	3237882336	8502247115	13511663724	3066025214	27141452381	27454615685	18599337679	12669311921	40653346041	16240899559	16912964716	3952132007	9604170611	10851228952	5167554350	23466907205	10894703216	4.38549e+08	6904932999	5249695347	4.07778e+06	19295472601	4.91145e+08	913940904	1875193843	1.24265e+07	4587009833	590263152	6.10993e+07	3198551636	3994693007	2.07035e+08	2894649613	4594149247	7608902282	2889192056	4238393905	1548473266	2689597210	7.76257e+08	8.30518e+08	3653586703	8.09579e+07	2455003480	1500031422
2002	100911641304	106525840739	207945771894	98027970718	3297438819	8388690581	13862686272	3100137978	26546046504	27179601438	18577113048	12888176201	40358267458	16339353196	15950167420	3999290727	9109640098	10885567754	5159845208	22516053561	10136602468	4.15753e+08	6651995553	5080120497	4.0766e+06	21703337104	4.83367e+08	9.19852e+08	1825723884	1.15451e+07	4582945719	5.82279e+08	6.35435e+07	3026203910	4104366263	2.59961e+08	2886333201	4670387120	7663072999	2829063189	4179019027	1433515860	2455507335	7.70365e+08	7.93277e+08	3811171120	8.31073e+07	2446267497	1493723882
2003	100363902942	104968471463	207201562860	95903217538	3281370153	8504501995	13878466950	3113461263	29519847399	27278134073	19067083370	12653823129	39362449318	16027355842	14929519409	3866731487	8775070414	11120784524	5019066439	21889654303	10036825861	4.24998e+08	6432706887	5370384969	4.01387e+06	21829030679	4.56838e+08	9.52103e+08	1771434049	1.15007e+07	4594093167	5.91253e+08	6.26871e+07	3290120629	4323196712	2.24347e+08	2979633736	4735175377	7692562560	2880681328	4203658988	1262398361	2527119589	7.33058e+08	8.04421e+08	3435150968	9.84345e+07	2441196781	1544138089
2004	99219516143	102781000247	208275513924	94884301436	3360513332	8663462656	13847222449	3019560803	32142655955	26843583272	18724704985	12022130225	40157808626	16320287239	17863717632	3971049586	8962314152	11338483103	5019544470	22389318783	9965741358	4.27317e+08	6324994731	5410387837	4.03399e+06	23622365646	4.26954e+08	9.66751e+08	1723109815	1.09565e+07	4480731257	5.96112e+08	6.34209e+07	3170520525	4531389243	2.54687e+08	2912091549	4321644629	7941413903	2855208701	4264610703	1245580274	2550234223	7.06931e+08	7.92891e+08	3447256035	9.87956e+07	2357554692	1513958063
2005	98243205566	101755198256	209284104233	91055747512	3323841095	8647270454	13798739305	2944540659	30141086996	27326315466	18846965072	11756749152	40975663572	16249668133	17725507183	3896041523	8663074278	11630848079	4920725124	22355153458	10273458888	3.8572e+08	6289684482	5209104919	3.3781e+06	24113676656	4.14207e+08	9.47e+08	1584945257	1.02112e+07	4380942452	5.9818e+08	6.45417e+07	3235207285	4624280977	283481788	2871822386	4719317948	7355419249	2828474537	4367789935	1189337932	2292707164	8.60443e+08	7.87001e+08	3323457864	1.10318e+08	2275453749	1420485325
2006	98326262195	100827907367	199876696557	89870609774	3392771859	8426727904	14167269942	2907337561	27538068197	26724966153	18695021788	11130829027	40824504589	15711806000	16314156020	4123954806	8824153633	11638839007	4685397286	21777661091	10268574963	4.21316e+08	6283740498	5066047547	3.44544e+06	24983575835	394353969	9.56051e+08	1495836708	1.05197e+07	4288395490	5.92339e+08	6.73452e+07	3028612511	4535660885	2.47329e+08	2766112203	4398578781	6848107600	2750080644	4384522091	1083837991	2101636810	775733247	7.70926e+08	3185897701	1.06172e+08	2367497240	1463802526
2007	96017987164	99213909315	191930138307	86915059879	3361223858	8162139146	14075835050	2854110298	27620946104	26235585920	18686107503	10950900769	40917790058	15077977742	15035287230	4103277314	8361625030	11645203154	4561347435	21538516506	9802821742	4.18488e+08	6322162702	4999448909	3.3664e+06	25964793281	3.8729e+08	9.34855e+08	1487962020	1.01142e+07	4224779958	5.84045e+08	6.78549e+07	2931793730	4642505749	2.2352e+08	2854158384	4519100715	6841414548	2692344747	4511254870	1038399143	2197126593	7.82416e+08	7.35949e+08	3093528987	9.55944e+07	2367291744	1468795889
2008	93363179901	100091375919	190713402199	86060206963	3404321119	8297901646	13398034732	2846836516	28248029421	25889492670	18325146290	11105539306	39883377070	15101882103	15875869840	4111125996	8658938215	11429444698	4775384098	21216168565	9637605645	4.21426e+08	6320860715	4666282204	3.30324e+06	24998012687	3.62137e+08	947370228	1470980510	1.055e+07	4275926741	6.04247e+08	7.11551e+07	2805217961	4739257697	3.28172e+08	2718389926	5395818123	6890802939	2651901800	4471598714	1080550015	1988784833	7.81353e+08	7.33745e+08	2747944750	7.09327e+07	2394090194	1548426295
2009	92753116971	101027171959	192841994556	86008373873	3473938359	8203267483	12893878631	2714399934	28688790759	26008599486	17999559790	11093393917	40396990704	14930736613	18500682382	4173295255	8442773257	11564407469	4389747818	21228830832	9497968232	420900287	6099128168	5471618766	3.37648e+06	24553243709	3.74235e+08	9.40351e+08	1476918599	1.06457e+07	4264775440	6.15587e+08	7.35676e+07	2783049335	4983485617	3.46736e+08	2753274303	5035375036	6732838075	2633655887	4599733066	1123846169	2031512956	7.46908e+08	7.26593e+08	2789810801	7.72616e+07	2419294145	1648600288
2010	90003044814	100411383105	185579454162	84866820574	3441303886	8188774220	12468026448	2515761563	27880384712	25488995769	17399817217	10721996352	39513582592	14553561642	17270878085	4120002675	7532326927	11390780782	4442383263	20409111217	9440790921	4.13227e+08	6148376321	5393668127	3.45558e+06	26937180975	3.78361e+08	9.4405e+08	1491554374	9.7745e+06	4153072745	606081986	7.29729e+07	2898971541	4662646338	2.87325e+08	2809224492	5236684949	6945874947	2347345725	4765147113	1077785545	2020076563	757508233	7.89637e+08	3030857936	7.16213e+07	2406727923	1544978634
2011	88844562267	101391173408	184184019176	84615388161	3427797015	8105405313	12358135610	2492149981	27041091248	25275358879	17483874615	10153651053	38777133921	13848668013	21084057121	4148133168	7640211247	11510716818	4307540339	21309375207	9315001142	403440304	5865151083	5907156300	3.32233e+06	27146473591	3.67892e+08	9.2729e+08	1448852253	9.00997e+06	3972116871	6.01714e+08	7.42864e+07	2827742595	4637124658	3.58192e+08	2826031986	5049307655	6741079931	2360896511	4873108190	1087592969	1786175125	6.95671e+08	7.72949e+08	2790450314	7.35871e+07	2453769185	1654569449
2012	86773718339	99541458773	186314109556	82808100949	3376541377	8186907026	12205319868	2409889648	26722395791	25273878654	16354477342	9998828236	39627261932	13478176605	21321692151	4231454148	7578146861	11574314773	4595279841	21777043049	9313805532	3.91747e+08	5862812280	5954974619	3.56399e+06	27459153507	3.59913e+08	9.22702e+08	1458972338	8.09114e+06	3906914156	571581913	7.66649e+07	2840056958	4785013833	3.04283e+08	2865893394	5247088098	6741079931	2401139065	5217705408	1060012532	1732563134	7.50497e+08	7.64286e+08	2551146217	7.45061e+07	2559961818	1640574045
2013	86056020598	99964934290	182883716657	83315385115	3402448449	8233755366	11852148606	2358285602	26619253704	25356699638	15838073657	9905085559	39500250071	13402673235	20690510793	4275685526	7491055370	11666059721	4431378745	21474629523	9413289559	3.90096e+08	5741441358	6027309144	3.36559e+06	27242167239	3.50603e+08	8.97842e+08	1455775085	7.58293e+06	4173829075	5.77103e+08	7.49803e+07	2951578673	4807952689	3.0406e+08	2933530975	5501223960	6650733444	2752499840	5614908527	1055372448	1840152220	7.49872e+08	7.31806e+08	2446797528	7.23574e+07	2013878642	1557453013
2014	85961954106	99014827072	179540942168	82784098601	3444172664	8087985427	12043957741	2692372730	25657808019	26077916148	14648341471	10120954985	41382413281	14266574094	20754868114	4309026178	7640424186	11608943594	4433305265	22662809859	9754732651	3.81915e+08	5512314877	5871448138	3.40546e+06	27172421736	3.20771e+08	8.70086e+08	1489134869	7.2026e+06	4207649560	570817360	7.99914e+07	2775802276	4757662043	4.0658e+08	2828045107	5420039443	6716197446	2741192273	5532533918	1051931829	1762332579	7.49727e+08	6.78059e+08	2589549530	7.1676e+07	1988078520	1594619804
2015	84183202902	98298725541	177806853775	83032795864	3447072857	8016470074	12107391507	2717662906	25734037750	27382267694	15745152564	10165996521	42533105741	14163501504	20140017475	4076795791	7687303886	11703245219	4346774087	22062502526	10013098656	3.87579e+08	5571728696	6243193227	3.42242e+06	26202806990	3.24223e+08	8.79258e+08	1502408890	6.26701e+06	4336138110	5.70942e+08	9.02598e+07	2842604095	4526105208	2.6377e+08	3065478027	5450799373	6769294030	2779656712	5134638236	1075338031	1739487289	7.0064e+08	6.80929e+08	2618294998	8.78119e+07	2005938434	1558475772
2016	83733227819	97943193158	174566830294	84332226429	3445094671	7893642674	11961789204	2800102624	26554787502	26927955806	16746728053	10116109525	42871159829	13943024620	19576632897	4054570918	7554376736	11552763870	4454973215	22585474924	9977636468	3.72526e+08	5640920209	6588845391	3.66173e+06	26860490053	3.25818e+08	8.73589e+08	1527904414	5.45391e+06	4351879882	5.95878e+08	8.90409e+07	3008597333	4530852080	2.69405e+08	2868871144	5455725218	6743161796	2754293778	5103870476	1015629653	1742921786	6.99754e+08	6.83911e+08	2396307271	7.26228e+07	1983378145	1498064603
Cultured Meat eco-potential WU (RIW weighted) - protein supply	China	United States	India	Russian Federation	Japan	Germany	Islamic Republic of Iran	Saudi Arabia	Indonesia	Canada	Mexico	South Africa	Brazil	Turkey	Australia	United Kingdom	Poland	France	Italy	Kazakhstan	Afghanistan	Albania	Algeria	Angola	Antigua and Barbuda	Argentina	Armenia	Austria	Azerbaijan	Barbados	Belarus	Belgium	Belize	Benin	Bolivia	Botswana	Bulgaria	Burkina Faso	Cameroon	Central African Republic	Chad	Chile	Colombia	Congo	Croatia	Cuba	Cyprus	Czechia	Denmark
2000	7475725782	8024205574	14866330601	7627694122	2.4263e+08	6.53493e+08	9.48645e+08	2.24157e+08	2036176476	2019965376	1391192010	946035554	2992573485	1183042147	1211766895	3.11049e+08	7.33157e+08	8.17235e+08	3.89194e+08	1782728306	7.64281e+08	3.34401e+07	528119245	3.97479e+08	295118	1379361590	3.60213e+07	6.9e+07	1.42131e+08	973594	3.69712e+08	4.66745e+07	4.69408e+06	2.2523e+08	2.92762e+08	2.80811e+07	2.14934e+08	2.80585e+08	606495485	2.17849e+08	2.97694e+08	1.16462e+08	2.32514e+08	5.93848e+07	6.60254e+07	2.63014e+08	6.04467e+06	1.87831e+08	1.19452e+08
2001	7540624146	8133124659	14934434085	7460556510	2.40404e+08	6.3127e+08	1003205784	2.27644e+08	2015182036	2038433594	1380952303	9.40663e+08	3018404891	1205844425	1255743509	2.93435e+08	7.13085e+08	8.05675e+08	3.83677e+08	1742356642	8.08903e+08	3.25611e+07	5.12673e+08	3.89776e+08	302764	1432638505	3.64662e+07	6.78577e+07	139228251	922635	340573514	4.38255e+07	4.53646e+06	237484115	2.96596e+08	1.53718e+07	2.1492e+08	3.41104e+08	5.64941e+08	2.14515e+08	3.1469e+08	1.1497e+08	1.99696e+08	5.7635e+07	6.16638e+07	2.71269e+08	6.01092e+06	182277604	1.11373e+08
2002	7492426119	7909265781	15439431096	7278321101	2.44826e+08	6.22838e+08	1029268292	2.30177e+08	1970974702	2018014503	1379302182	9.56913e+08	2996496076	1213154350	1184258322	2.96937e+08	676367013	8.08225e+08	3.83105e+08	1671758239	752616290	3.08686e+07	4.93893e+08	3.77186e+08	302677	1611416163	3.58887e+07	6.82966e+07	1.35555e+08	857194	3.40272e+08	4.32327e+07	4.71794e+06	2.24688e+08	304738488	1.93014e+07	2.14303e+08	346764060	5.68963e+08	2.10051e+08	3.10281e+08	106434813	1.82315e+08	5.71976e+07	5.88988e+07	2.8297e+08	6.1705e+06	1.81629e+08	1.10905e+08
2003	7451757975	7793635175	15384175517	7120563720	2.43633e+08	6.31437e+08	1030439966	2.31166e+08	2191771661	2025330295	1415681200	9.39513e+08	2922559177	1189989361	1108477870	2.87095e+08	6.51526e+08	8.25689e+08	3.72653e+08	1625249729	7.45208e+08	3.1555e+07	4.77612e+08	3.98737e+08	298019	1620748583	3.3919e+07	7.06912e+07	131524357	853895	341099433	4.3899e+07	4.65435e+06	2.44283e+08	320986078	1.66572e+07	2.2123e+08	3.51574e+08	5.71153e+08	2.13883e+08	3.12111e+08	9.37298e+07	187632037	5.44276e+07	5.97262e+07	2.55051e+08	7.30851e+06	1.81252e+08	1.14648e+08
2004	7366790240	7631221144	15463913581	7044911857	2.49509e+08	6.4324e+08	1028120144	2.24195e+08	2386508354	1993066031	1390260498	8.92612e+08	2981612531	1211738753	1326334433	2.9484e+08	6.65428e+08	8.41853e+08	3.72688e+08	1662348513	7.3993e+08	3.17272e+07	4.69614e+08	4.01707e+08	299513	1753899026	3.17003e+07	7.17787e+07	1.27936e+08	813491	332682607	4.42597e+07	4.70883e+06	235402878	3.36444e+08	1.89099e+07	2.16215e+08	3.20871e+08	5.89629e+08	2.11992e+08	3.16636e+08	9.24811e+07	1.89348e+08	5.24878e+07	5.88701e+07	2.5595e+08	7.33532e+06	1.75042e+08	1.12407e+08
2005	7294301727	7555058022	15538798781	6760651716	2.46787e+08	6.42037e+08	1024520397	2.18624e+08	2237897081	2028907637	1399337991	8.72908e+08	3042336127	1206495468	1316072668	2.89271e+08	6.43211e+08	8.6356e+08	3.65351e+08	1659811826	7.62778e+08	2.86387e+07	4.66993e+08	3.86762e+08	250815	1790377586	3.07538e+07	7.03123e+07	1.17678e+08	758152	3.25274e+08	4.44133e+07	4.79205e+06	2.40206e+08	3.43341e+08	2.10478e+07	2.13225e+08	3.50397e+08	5.46121e+08	2.10007e+08	3.24297e+08	8.83052e+07	1.70228e+08	6.38857e+07	5.84328e+07	2.46758e+08	8.19086e+06	1.68947e+08	1.05467e+08
2006	7300468465	7486209093	14840323302	6672658331	2.51904e+08	6.25663e+08	1051882835	2.15862e+08	2044629725	1984259020	1388056598	8.26435e+08	3031112967	1166560608	1211283526	3.06193e+08	6.5517e+08	8.64153e+08	3.47879e+08	1616934525	7.62415e+08	3.12816e+07	4.66551e+08	3.76141e+08	255815	1854965331	2.92798e+07	7.09843e+07	1.11062e+08	781060	318402178	4.39796e+07	5.0002e+06	2.24867e+08	3.36761e+08	1.83635e+07	2.05377e+08	3.26583e+08	5.08454e+08	2.04186e+08	3.25539e+08	8.04721e+07	1.56041e+08	5.75962e+07	5.72392e+07	2.36545e+08	7.88298e+06	175780494	108683519
2007	7129085065	7366373948	14250312082	6453216461	2.49562e+08	606017539	1045094033	2.1191e+08	2050783194	1947923814	1387394736	8.13076e+08	3038039170	1119500513	1116330854	3.04658e+08	6.20829e+08	8.64626e+08	3.38668e+08	1599178663	7.27834e+08	3.10716e+07	469404088	3.71196e+08	249946	1927818167	2.87552e+07	6.94105e+07	1.10477e+08	750950	3.13679e+08	4.33638e+07	5.03805e+06	2.17678e+08	344693941	1.65958e+07	2.11914e+08	3.35531e+08	5.07957e+08	1.999e+08	3.34949e+08	7.70984e+07	1.63131e+08	5.80924e+07	5.46423e+07	2.29686e+08	7.09764e+06	1.75765e+08	1.09054e+08
2008	6931972551	7431523554	14159972600	6389745862	2.52762e+08	6.16098e+08	9.94769e+08	2.1137e+08	2097342494	1922227293	1360594307	8.24557e+08	2961236704	1121275350	1178741920	3.0524e+08	6.42904e+08	8.48606e+08	3.5456e+08	1575245169	7.15567e+08	3.12898e+07	4.69307e+08	3.46459e+08	245257	1856037230	2.68877e+07	7.03398e+07	1.09216e+08	783310	3.17476e+08	4.48637e+07	5.28308e+06	2.0828e+08	3.51878e+08	2.43659e+07	2.01833e+08	4.00625e+08	5.11624e+08	1.96897e+08	3.32005e+08	8.0228e+07	1.47662e+08	5.80134e+07	5.44787e+07	2.04028e+08	5.26657e+06	1.77755e+08	114966613
2009	6886676970	7501003969	14318015030	6385897390	2.57931e+08	6.09071e+08	9.57337e+08	2.01537e+08	2130067873	1931070663	1336420359	8.23656e+08	2999371176	1108568244	1373627404	3.09856e+08	6.26854e+08	8.58627e+08	325927324	1576185310	7.05199e+08	3.12507e+07	4.52844e+08	4.06253e+08	250695	1823014293	2.7786e+07	6.98186e+07	1.09657e+08	790413	3.16648e+08	4.57057e+07	5.4622e+06	206634153	3.70011e+08	2.57442e+07	2.04423e+08	3.73863e+08	4.99896e+08	1.95542e+08	3.41518e+08	8.34426e+07	1.50835e+08	5.5456e+07	5.39476e+07	2.07136e+08	5.73647e+06	1.79626e+08	1.22404e+08
2010	6682491287	7455283253	13778790351	6301140036	2.55508e+08	6.07995e+08	9.25718e+08	1.86789e+08	2070045833	1892491443	1291891038	7.9608e+08	2933780429	1080563986	1282317643	3.05899e+08	5.59256e+08	845735758	3.29835e+08	1515323267	7.00954e+08	3.0681e+07	4.56501e+08	400465788	256568	2000015417	2.80923e+07	7.00933e+07	1.10744e+08	725731	3.08355e+08	4.5e+07	5.41805e+06	2.15241e+08	3.46189e+08	2.13331e+07	2.08578e+08	3.8881e+08	5.15713e+08	1.74284e+08	3.538e+08	8.00228e+07	1.49985e+08	5.6243e+07	5.86285e+07	2.25033e+08	5.3177e+06	1.78693e+08	1.14711e+08
2011	6596476980	7528030127	13675182944	6282471835	2.54505e+08	6.01805e+08	9.17559e+08	1.85036e+08	2007730483	1876629461	1298132080	7.53882e+08	2879101036	1028227473	1565436239	3.07988e+08	5.67266e+08	8.54641e+08	3.19824e+08	1582165519	6.91615e+08	2.99544e+07	4.35472e+08	4.38591e+08	246674	2015554847	2.7315e+07	6.88489e+07	1.07574e+08	668967	2.94919e+08	4.46757e+07	5.51557e+06	209952511	344294409	2.65948e+07	2.09826e+08	3.74898e+08	5.00508e+08	1.7529e+08	3.61816e+08	8.07509e+07	1.32619e+08	5.16518e+07	5.73894e+07	2.07184e+08	5.46365e+06	1.82186e+08	1.22847e+08
2012	6442722220	7390693641	13833336598	6148285474	2.50699e+08	6.07856e+08	9.06213e+08	1.78928e+08	1984068177	1876519558	1214277279	7.42387e+08	2942220823	1000719452	1583080020	3.14174e+08	5.62658e+08	859362678	3.41188e+08	1616888637	6.91526e+08	2.90862e+07	4.35299e+08	4.42141e+08	264617	2038770515	2.67226e+07	6.85082e+07	1.08325e+08	600746	2.90078e+08	4.24385e+07	5.69217e+06	2.10867e+08	3.55275e+08	2.25922e+07	2.12785e+08	3.89583e+08	5.00508e+08	1.78278e+08	3.87401e+08	7.87032e+07	1.28638e+08	5.57224e+07	5.67463e+07	1.89416e+08	5.53188e+06	1.9007e+08	1.21808e+08
2013	6389435035	7422135593	13578638874	6185950000	2.52623e+08	6.11335e+08	8.79991e+08	1.75097e+08	1976410146	1882668800	1175935652	7.35427e+08	2932790524	9.95114e+08	1536216451	3.17458e+08	5.56191e+08	8.66175e+08	3.29018e+08	1594435221	6.98912e+08	2.89636e+07	4.26287e+08	4.47512e+08	249886	2022659851	2.60313e+07	6.66624e+07	1.08088e+08	563012	3.09896e+08	4.28484e+07	5.56709e+06	2.19147e+08	3.56978e+08	2.25757e+07	2.17807e+08	408451528	4.938e+08	2.04366e+08	4.16892e+08	7.83587e+07	136626502	5.5676e+07	5.43347e+07	1.81668e+08	5.37235e+06	1.49525e+08	1.15637e+08
2014	6382450844	7351592611	13330446588	6146503363	2.55721e+08	6.00512e+08	8.94232e+08	1.99902e+08	1905025312	1936217245	1087601141	7.51455e+08	3072536232	1059255909	1540994814	3.19934e+08	5.67282e+08	8.61934e+08	3.29161e+08	1682654512	7.24263e+08	2.83562e+07	4.09275e+08	4.3594e+08	252846	2017481429	2.38164e+07	6.46016e+07	1.10564e+08	534774	3.12407e+08	4.23817e+07	5.93915e+06	2.06096e+08	3.53244e+08	3.01875e+07	2.09975e+08	4.02424e+08	4.9866e+08	2.03526e+08	4.10776e+08	7.81032e+07	1.30849e+08	5.56652e+07	5.03441e+07	1.92267e+08	5.32176e+06	1.4761e+08	1.18396e+08
2015	6250383207	7298423940	13201695049	6164968486	2.55936e+08	5.95202e+08	8.98942e+08	2.01779e+08	1910685171	2033061944	1169036504	7.54799e+08	3157972145	1051603038	1495343758	3.02691e+08	5.70762e+08	8.68935e+08	3.22737e+08	1638083258	7.43446e+08	2.87767e+07	4.13686e+08	4.63541e+08	254106	1945490064	2.40727e+07	6.52826e+07	1.1155e+08	465310	321946943	4.2391e+07	6.70155e+06	2.11056e+08	3.36052e+08	1.95842e+07	2.27604e+08	404707634	5.02602e+08	2.06382e+08	3.81233e+08	7.9841e+07	1.29152e+08	5.20207e+07	5.05572e+07	1.94402e+08	6.51981e+06	1.48936e+08	1.15713e+08
2016	6216973731	7272026588	12961131758	6261447815	2.55789e+08	5.86082e+08	8.88132e+08	2.079e+08	1971623699	1999330472	1243400871	7.51095e+08	3183071779	1035233205	1453513923	3.01041e+08	5.60893e+08	8.57763e+08	3.3077e+08	1676912594	7.40813e+08	2.76591e+07	4.18824e+08	489204582	271874	1994321316	2.41912e+07	6.48617e+07	1.13443e+08	404939	3.23116e+08	4.42424e+07	6.61106e+06	2.23381e+08	3.36404e+08	2.00026e+07	2.13006e+08	4.05073e+08	5.00662e+08	2.04499e+08	3.78949e+08	7.54079e+07	1.29407e+08	5.19549e+07	5.07786e+07	1.7792e+08	5.39205e+06	1.47261e+08	1.11227e+08
Black Solider Fly eco-potential WU (RIW weighted) - protein supply	China	United States	India	Russian Federation	Japan	Germany	Islamic Republic of Iran	Saudi Arabia	Indonesia	Canada	Mexico	South Africa	Brazil	Turkey	Australia	United Kingdom	Poland	France	Italy	Kazakhstan	Afghanistan	Albania	Algeria	Angola	Antigua and Barbuda	Argentina	Armenia	Austria	Azerbaijan	Barbados	Belarus	Belgium	Belize	Benin	Bolivia	Botswana	Bulgaria	Burkina Faso	Cameroon	Central African Republic	Chad	Chile	Colombia	Congo	Croatia	Cuba	Cyprus	Czechia	Denmark
2000	11160452354	11979273532	22193828292	11387324696	3.6222e+08	9.75595e+08	1416224517	3.34642e+08	3039791882	3015590459	2076899635	1412329055	4467589472	1766154338	1809037288	4.64363e+08	1094523634	1220044120	5.81025e+08	2661421098	1140988380	4.99224e+07	7.88425e+08	5.93393e+08	440580	2059238094	5.3776e+07	1.0301e+08	2.12187e+08	1.45347e+06	5.5194e+08	6.968e+07	7.00775e+06	3.36244e+08	4.37063e+08	4.1922e+07	3.20874e+08	4.18883e+08	9.05432e+08	3.25225e+08	4.44426e+08	1.73866e+08	3.47118e+08	8.86551e+07	9.85689e+07	3.92651e+08	9.02404e+06	2.80411e+08	1.78329e+08
2001	11257338613	12141877979	22295499449	11137806268	358897718	9.42418e+08	1497678042	3.39848e+08	3008449447	3043161516	2061612856	1404308948	4506152976	1800195679	1874689631	4.38068e+08	1064558424	1202786545	5.72789e+08	2601150558	1207605378	4.86102e+07	7.65366e+08	5.81894e+08	451995	2138774781	5.44401e+07	1.01304e+08	2.07853e+08	1.3774e+06	5.0844e+08	6.54267e+07	6.77245e+06	3.54538e+08	4.42785e+08	2.29485e+07	3.20853e+08	5.09231e+08	8.43396e+08	320247720	4.69798e+08	1.71638e+08	2.98124e+08	8.60429e+07	9.20574e+07	4.04976e+08	8.97365e+06	2.72121e+08	1.66269e+08
2002	11185384157	11807680818	23049405523	10865748455	365499158	9.29831e+08	1536586556	3.4363e+08	2942452666	3012678016	2059149403	1428568597	4473445478	1811108610	1767969955	4.43295e+08	1009743006	1206592773	5.71935e+08	2495754757	1123574953	4.60834e+07	7.37329e+08	5.63098e+08	451864	2405670544	5.3578e+07	1.01959e+08	2.02369e+08	1.2797e+06	5.07989e+08	6.45418e+07	7.04337e+06	3.35435e+08	4.54942e+08	2.88149e+07	3.19931e+08	517681344	8.49401e+08	3.13583e+08	4.63216e+08	158895697	2.72177e+08	8.53899e+07	8.79295e+07	4.22443e+08	9.21189e+06	271152479	1.65569e+08
2003	11124671003	11635056793	22966914902	10630233699	3.63718e+08	9.42667e+08	1538335739	3.45106e+08	3272078713	3023599703	2113459354	1402592118	4363065661	1776525778	1654837913	4.28601e+08	9.72658e+08	1232664987	5.5633e+08	2426322566	1112515380	4.71081e+07	713022767	5.95271e+08	444911	2419602840	5.06375e+07	1.05534e+08	1.96352e+08	1.27477e+06	5.09225e+08	6.55364e+07	6.94845e+06	3.64688e+08	4.79198e+08	2.48674e+07	3.30273e+08	5.24863e+08	8.52669e+08	3.19304e+08	4.65948e+08	1.39928e+08	2.80114e+08	8.12546e+07	8.91647e+07	3.80764e+08	1.09108e+07	2.7059e+08	1.71157e+08
2004	10997823339	11392590160	23085955234	10517293627	3.72491e+08	9.60287e+08	1534872494	3.34698e+08	3562799594	2975432638	2075508988	1332573162	4451225949	1808995275	1980074267	4.40164e+08	9.93413e+08	1256795426	5.56383e+08	2481707049	1104636136	4.73653e+07	701083591	5.99706e+08	447141	2618382092	4.73251e+07	1.07158e+08	1.90995e+08	1.21445e+06	4.96659e+08	6.6075e+07	7.02978e+06	3.51431e+08	502274354	2.82304e+07	3.22786e+08	4.79026e+08	8.80253e+08	3.16481e+08	4.72704e+08	1.38064e+08	282676499	7.83586e+07	8.78867e+07	3.82105e+08	1.09508e+07	2.61319e+08	1.67812e+08
2005	10889605806	11278886833	23197750760	10092923893	3.68426e+08	9.58492e+08	1529498460	3.26383e+08	3340938990	3028940290	2089060705	1303157436	4541879730	1801167617	1964754558	4.3185e+08	9.60244e+08	1289202139	5.4543e+08	2477920050	1138744577	4.27545e+07	6.9717e+08	5.77395e+08	374440	2672840649	4.59121e+07	1.04969e+08	1.75681e+08	1.13184e+06	485598328	6.63043e+07	7.15402e+06	3.58601e+08	5.12571e+08	3.14221e+07	3.18322e+08	5.23105e+08	8.15299e+08	3.13518e+08	484140459	1.3183e+08	2.54131e+08	9.53744e+07	8.72338e+07	368383196	1.22281e+07	2.52219e+08	1.57451e+08
2006	10898812081	11176102807	22155002199	9961559259	3.76066e+08	9.34047e+08	1570347630	3.22259e+08	3052411672	2962284719	2072218803	1233778353	4525124762	1741549177	1808315670	4.57113e+08	9.78099e+08	1290087880	5.19345e+08	2413908863	1138203226	4.67001e+07	6.96511e+08	5.61538e+08	381904	2769263186	4.37115e+07	1.05972e+08	1.65804e+08	1.16604e+06	4.7534e+08	6.56568e+07	7.46476e+06	335701550	5.02748e+08	2.74148e+07	306605137	4.87553e+08	7.59067e+08	3.04828e+08	4.85995e+08	1.20136e+08	2.32952e+08	8.59849e+07	8.5452e+07	353135567	1.17684e+07	262421320	1.62253e+08
2007	10642955149	10997201859	21274179079	9633956213	3.72569e+08	9.04719e+08	1560212680	3.16359e+08	3061598136	2908040176	2071230713	1213834503	4535464836	1671293531	1666561572	4.54821e+08	9.26831e+08	1290793304	5.05595e+08	2387401277	1086577580	4.63866e+07	7.0077e+08	5.54156e+08	373143	2878024613	4.29285e+07	1.03622e+08	1.64931e+08	1.12109e+06	4.68289e+08	6.47375e+07	7.52127e+06	3.2497e+08	5.14591e+08	2.47757e+07	3.16364e+08	5.00912e+08	7.58325e+08	2.98429e+08	5.00043e+08	1.151e+08	2.43537e+08	8.67256e+07	8.1575e+07	3.42897e+08	1.0596e+07	2.62399e+08	1.62806e+08
2008	10348687424	11094463195	21139311975	9539201454	3.77346e+08	9.19767e+08	1485083024	3.15553e+08	3131106151	2869678041	2031220564	1230975156	4420807037	1673943171	1759734563	4.55691e+08	9.59786e+08	1266877914	5.2932e+08	2351671152	1068264475	4.67123e+07	7.00625e+08	5.17226e+08	366143	2770863415	4.01405e+07	1.0501e+08	1.63048e+08	1.1694e+06	4.73958e+08	6.69767e+07	7.88707e+06	3.1094e+08	5.25315e+08	3.63757e+07	3.01315e+08	598090545	763799667	2.93946e+08	4.95647e+08	1.19772e+08	2.20444e+08	8.66078e+07	8.13308e+07	3.04591e+08	7.86242e+06	2.65369e+08	1.71633e+08
2009	10281066006	11198189961	21375252278	9533456101	3.85063e+08	909277631	1429200674	3.00873e+08	3179961613	2882880239	1995131467	1229628921	4477737692	1654972832	2050677572	4.62582e+08	9.35825e+08	1281837639	4.86574e+08	2353074680	1052786596	4.6654e+07	6.76048e+08	6.06493e+08	374261	2721563733	4.14814e+07	104231624	1.63707e+08	1.18e+06	4.72722e+08	6.82337e+07	8.15448e+06	3.08483e+08	5.52386e+08	3.84333e+07	3.05182e+08	5.58138e+08	7.4629e+08	2.91923e+08	5.0985e+08	1.24571e+08	2.2518e+08	8.27898e+07	8.0538e+07	309231969	8.56393e+06	2.68163e+08	1.82736e+08
2010	9976238802	11129933863	20570247987	9406922512	3.81446e+08	9.07671e+08	1381997792	278855434	3090355180	2825285624	1928653992	1188461971	4379817779	1613165495	1914361947	4.56675e+08	8.34908e+08	1262592276	4.92409e+08	2262214213	1046448872	4.58035e+07	6.81507e+08	5.97852e+08	383028	2985807320	4.19388e+07	1.04642e+08	1.65329e+08	1.08344e+06	4.6034e+08	6.71802e+07	8.08856e+06	3.21332e+08	5.16823e+08	3.1848e+07	3.11384e+08	5.80452e+08	7.69904e+08	2.60188e+08	5.28185e+08	1.19465e+08	2.23912e+08	8.39647e+07	8.7526e+07	3.3595e+08	7.93875e+06	2.6677e+08	1.71251e+08
2011	9847828718	11238537101	20415573302	9379052901	3.79948e+08	8.9843e+08	1369817124	2.76238e+08	2997325083	2801605396	1937971195	1125464675	4298187343	1535032726	2337027477	4.59793e+08	8.46867e+08	1275886388	4.77462e+08	2362002488	1032505912	4.47187e+07	6.50113e+08	6.54769e+08	368258	3009006014	4.07784e+07	1.02784e+08	1.60596e+08	998696	440282732	6.6696e+07	8.23415e+06	3.13436e+08	5.13994e+08	3.97032e+07	3.13247e+08	5.59682e+08	7.47204e+08	2.6169e+08	5.40152e+08	1.20552e+08	1.97986e+08	7.71105e+07	8.56762e+07	3.09303e+08	8.15665e+06	2.71984e+08	183398017
2012	9618289444	11033508538	20651679650	9178727136	3.74267e+08	9.07464e+08	1352878515	2.6712e+08	2961999811	2801441323	1812785021	1108303596	4392418378	1493966218	2363367739	4.69029e+08	8.39987e+08	1282935798	5.09356e+08	2413840357	1032373386	4.34225e+07	6.49854e+08	660069323	395045	3043664503	3.98939e+07	1.02275e+08	1.61717e+08	896850	4.33055e+08	6.33561e+07	8.49779e+06	3.14801e+08	5.30387e+08	3.37277e+07	3.17665e+08	5.81605e+08	7.47204e+08	2.6615e+08	5.78348e+08	1.17495e+08	1.92043e+08	83187573	8.47161e+07	2.82778e+08	8.2585e+06	2.83755e+08	1.81847e+08
2013	9538737424	11080447982	20271443417	9234956212	3.77139e+08	9.12657e+08	1313731830	2.614e+08	2950567197	2810621478	1755545107	1097912844	4378339958	1485597171	2293405484	4.73931e+08	830333656	1293105115	4.91189e+08	2380319830	1043400529	4.32395e+07	6.36401e+08	6.68087e+08	373053	3019613019	3.8862e+07	9.95198e+07	1.61363e+08	840517	462641188	6.3968e+07	8.31107e+06	3.27163e+08	5.3293e+08	3.37031e+07	3.25162e+08	6.09774e+08	7.3719e+08	3.05096e+08	6.22375e+08	1.16981e+08	2.03969e+08	8.31183e+07	8.11158e+07	2.71211e+08	8.02033e+06	2.23225e+08	1.72633e+08
2014	9528310779	10975134917	19900919102	9176066636	3.81764e+08	8.96499e+08	1334992597	298431607	2843997339	2890563530	1623671209	1121840534	4586965229	1581354835	2300539065	4.77627e+08	8.4689e+08	1286774173	4.91402e+08	2512021716	1081247224	4.23327e+07	6.11003e+08	6.50811e+08	377473	3011882194	3.55553e+07	9.64433e+07	1.65061e+08	798360	4.6639e+08	6.32713e+07	8.86651e+06	3.07679e+08	5.27355e+08	4.50667e+07	3.1347e+08	6.00775e+08	7.44446e+08	3.03843e+08	6.13245e+08	1.166e+08	1.95343e+08	8.31022e+07	7.51584e+07	2.87034e+08	7.94481e+06	2.20365e+08	1.76753e+08
2015	9331148040	10895759826	19708706939	9203633073	3.82085e+08	8.88572e+08	1342023808	3.01235e+08	2852446897	3035142222	1745245422	1126833088	4714511834	1569929924	2232386962	4.51886e+08	8.52086e+08	1297226880	481810992	2445481641	1109885377	4.29606e+07	6.17589e+08	6.92016e+08	379353	2904406849	3.5938e+07	9.74599e+07	1.66532e+08	694657	4.80632e+08	6.32851e+07	1.00047e+07	3.15084e+08	5.01689e+08	2.92371e+07	3.39788e+08	6.04185e+08	7.50331e+08	3.08106e+08	5.6914e+08	1.19194e+08	1.92811e+08	7.76613e+07	7.54764e+07	2.90221e+08	9.73337e+06	2.22345e+08	1.72747e+08
2016	9281271296	10856351426	19349571889	9347666307	3.81866e+08	8.74958e+08	1325884761	3.10373e+08	2943421548	2984784772	1856263402	1121303447	4751982881	1545491528	2169939529	4.49422e+08	8.37352e+08	1280547024	4.93804e+08	2503449653	1105954630	4.1292e+07	6.25258e+08	7.3033e+08	405879	2977306642	3.61148e+07	96831500	1.69358e+08	604530	4.82377e+08	6.60491e+07	9.8696e+06	3.33483e+08	502214813	2.98617e+07	3.17995e+08	604730848	7.47435e+08	3.05295e+08	5.6573e+08	1.12576e+08	1.93191e+08	7.75631e+07	7.5807e+07	2.65615e+08	8.04975e+06	2.19844e+08	1.6605e+08
Chlorella eco-potential WU (RIW weighted) - protein supply	China	United States	India	Russian Federation	Japan	Germany	Islamic Republic of Iran	Saudi Arabia	Indonesia	Canada	Mexico	South Africa	Brazil	Turkey	Australia	United Kingdom	Poland	France	Italy	Kazakhstan	Afghanistan	Albania	Algeria	Angola	Antigua and Barbuda	Argentina	Armenia	Austria	Azerbaijan	Barbados	Belarus	Belgium	Belize	Benin	Bolivia	Botswana	Bulgaria	Burkina Faso	Cameroon	Central African Republic	Chad	Chile	Colombia	Congo	Croatia	Cuba	Cyprus	Czechia	Denmark
2000	32355456349	34729314688	64342503307	33013185796	1050117534	2828364364	4105800471	9.70167e+08	8812712103	8742549348	6021174890	4094507071	12952064267	5120287939	5244610626	1346241266	3173151997	3537050562	1684459738	7715770958	3307858727	1.44731e+08	2285736486	1720315988	1.27729e+06	5969972017	1.55903e+08	2.98637e+08	6.15155e+08	4.21378e+06	1600138514	2.02011e+08	2.03163e+07	9.7481e+08	1267096045	1.21537e+08	9.3025e+08	1214391080	2624954254	9.42864e+08	1288441595	5.04058e+08	1006335634	2.57021e+08	2.85763e+08	1138341015	2.61617e+07	8.12945e+08	5.16997e+08
2001	32636340943	35200723991	64637259881	32289802696	1040486450	2732178627	4341943765	9.85261e+08	8721846720	8822481067	5976856730	4071255844	13063864374	5218977767	5434944444	1270009029	3086279347	3487018834	1660582356	7541039615	3500989194	1.40927e+08	2218885209	1686978187	1.31038e+06	6200558174	157828336	2.93693e+08	6.02589e+08	3.99323e+06	1474025638	1.8968e+08	1.96341e+07	1027847615	1283685914	6.65303e+07	9.30189e+08	1476319873	2445104207	9.28436e+08	1361998668	4.97599e+08	8.64296e+08	2.49448e+08	2.66885e+08	1174072145	2.60157e+07	7.8891e+08	4.82032e+08
2002	32427736560	34231847344	66822921742	31501075286	1059624796	2695687482	4454744097	9.96223e+08	8530514335	8734105836	5969714893	4141587404	12969041512	5250615629	5125551626	1285163381	2927363042	3498053534	1658105041	7235484864	3257375167	1.33601e+08	2137604310	1632485678	1.31001e+06	6974320197	1.55329e+08	2.95592e+08	5.86692e+08	3.71e+06	1472719644	1.87114e+08	2.04196e+07	9.72464e+08	1318929176	8.35378e+07	9.27517e+08	1500818748	2462511849	9.09113e+08	1342918679	4.60657e+08	789071944	2.47555e+08	2.54918e+08	1224711554	2.67063e+07	7.86103e+08	4.80005e+08
2003	32251722028	33731390112	66583771787	30818290471	1054461165	2732903228	4459815184	1000504008	9486138788	8765769084	6127165791	4066278554	12649037518	5150355958	4797568607	1242565757	2819849801	3573639931	1612866089	7034192824	3225312171	1.36572e+08	2067136374	1725761535	1.28985e+06	7014711554	1.46804e+08	3.05956e+08	5.69246e+08	3.69572e+06	1476301852	1.89998e+08	2.01444e+07	1057273112	1389249865	7.20934e+07	9.57499e+08	1521638313	2471988256	9.25701e+08	1350836677	405668969	8.12084e+08	2.35567e+08	2.58499e+08	1103878296	3.16317e+07	7.84473e+08	4.96205e+08
2004	31883975818	33028450993	66928883627	30490863996	1079893654	2783984891	4449774831	9.70329e+08	10328972616	8626127129	6017143241	3863285413	12904624502	5244488825	5740466827	1276088152	2880020169	3643596896	1613019703	7194758919	3202469321	1.37317e+08	2032523307	1738616370	1.29631e+06	7590995847	1.37201e+08	3.10663e+08	5.53718e+08	3.52085e+06	1439873249	1.91559e+08	2.03802e+07	1018839878	1456152082	8.18432e+07	9.35794e+08	1388751107	2551956094	9.17515e+08	1370423379	4.00265e+08	8.19512e+08	2.27171e+08	2.54794e+08	1107768233	3.17478e+07	7.57595e+08	4.86507e+08
2005	31570240536	32698811753	67252991930	29260566516	1068109110	2778781562	4434194878	9.46222e+08	9685772782	8781252070	6056431254	3778005782	13167440411	5221795529	5696053200	1251984474	2783860086	3737547746	1581264321	7183779966	3301353680	1.2395e+08	2021176435	1673934541	1.08555e+06	7748877572	1.33105e+08	3.04316e+08	509318713	3.28133e+06	1407806333	1.92224e+08	2.07403e+07	1039626828	1486002639	9.10963e+07	9.22854e+08	1516542563	2363647986	9.08924e+08	1403579800	3.82191e+08	7.36756e+08	276501515	2.52901e+08	1067985960	3.54506e+07	7.31212e+08	4.5647e+08
2006	31596930604	32400828841	64229941924	28879725080	1090259861	2707910693	4552621397	9.34267e+08	8849298350	8588009776	6007604610	3576867710	13118865801	5048954702	5242518571	1325223912	2835622587	3740115613	1505642232	6998204049	3299784241	1.35389e+08	2019266349	1627963366	1.10718e+06	8028417783	1.26725e+08	307224788	4.80684e+08	3.38048e+06	1378066568	1.90347e+08	2.16412e+07	9.73238e+08	1457524765	7.94787e+07	888884143	1413473729	2200624490	8.83732e+08	1408956642	3.48289e+08	6.75356e+08	2.4928e+08	2.47735e+08	1023781300	3.41181e+07	7.6079e+08	4.7039e+08
2007	30855171441	31882174076	61676332706	27929965546	1080121980	2622885671	4523238994	9.17162e+08	8875930985	8430748502	6004740024	3519048156	13148842883	4845275369	4831556866	1318579245	2686990026	3742160718	1465779082	6921355456	3150115456	1.3448e+08	2031613241	1606562038	1.08178e+06	8343729876	1.24455e+08	3.00413e+08	4.78153e+08	3.25016e+06	1357623855	1.87681e+08	2.1805e+07	9.42126e+08	1491859130	71827717	917177592	1452203190	2198473693	8.65179e+08	1449681945	3.33687e+08	7.06042e+08	2.51428e+08	2.36496e+08	9.94099e+08	3.07191e+07	7.60724e+08	4.71994e+08
2008	30002054898	32164146062	61285337202	27655260420	1093971191	2666512655	4305429335	9.14825e+08	9077442846	8319532188	5888745923	3568740913	12816436519	4852956984	5101676260	1321101402	2782530972	3672827207	1534559299	6817769646	3097023623	135424332	2031194850	1499499642	1.06149e+06	8033057034	1.16372e+08	3.04435e+08	4.72696e+08	3.39022e+06	1374059763	1.94173e+08	2.28655e+07	9.01451e+08	1522950158	1.05457e+08	8.73549e+08	1733934424	2214344544	8.52183e+08	1436938526	3.47232e+08	6.39092e+08	2.51086e+08	2.35787e+08	8.83046e+08	2.27941e+07	7.69336e+08	4.97583e+08
2009	29806012501	32464862085	61969355729	27638603969	1116342540	2636102173	4143419868	8.72267e+08	9219080543	8357806904	5784119409	3564838019	12981485143	4797959753	5945154064	1341079358	2713066832	3716197200	1410635918	6821838638	3052151444	1.35255e+08	1959941578	1758292796	1.08503e+06	7890131489	1.2026e+08	3.0218e+08	4.74605e+08	3.42096e+06	1370476316	1.97818e+08	2.36408e+07	8.94327e+08	1601432269	1.11423e+08	884758712	1618106821	2163582879	8.4632e+08	1478114221	3.61146e+08	652822272	2.40017e+08	2.33489e+08	8.965e+08	2.48278e+07	7.77435e+08	5.29774e+08
2010	28922282792	32266979675	59635554161	27271768299	1105855523	2631444794	4006573195	8.08435e+08	8959301018	8190833379	5591393437	3445490219	12697603867	4676755395	5549959127	1323953903	2420496884	3660402642	1427550204	6558423522	3033777639	1.3279e+08	1975767365	1733243527	1.11044e+06	8656204547	1.21586e+08	303368417	4.79308e+08	3.14101e+06	1334580898	1.94763e+08	2.34497e+07	9.31578e+08	1498331265	9.23312e+07	9.02738e+08	1682797324	2232041814	7.54314e+08	1531269666	3.46344e+08	6.49147e+08	2.43424e+08	2.53748e+08	9.7396e+08	2.30154e+07	773396786	4.96476e+08
2011	28550006944	32581833159	59187134162	27190971039	1101515119	2604654377	3971260013	8.00847e+08	8689595888	8122181629	5618405099	3262853693	12460947687	4450239360	6775315921	1332993576	2455165275	3698943826	1384218724	6847721398	2993355367	1.29645e+08	1884753550	1898251835	1.06762e+06	8723460274	1.18221e+08	2.97983e+08	465585522	2.89534e+06	1276431122	1.9336e+08	2.38718e+07	9.08689e+08	1490129928	1.15104e+08	908139235	1622584038	2166231381	7.58669e+08	1565962723	3.49496e+08	5.73983e+08	2.23552e+08	2.48385e+08	8.96705e+08	2.36471e+07	7.88513e+08	5.31692e+08
2012	27884545750	31987431382	59871634075	26610203222	1085044231	2630844775	3922153006	7.74413e+08	8587183795	8121705962	5255475741	3213101717	12734134476	4331182752	6851679421	1359768592	2435221020	3719380891	1476683187	6998005442	2992971160	125886952	1884001981	1913618148	1.14528e+06	8823939286	1.15657e+08	2.96508e+08	468837589	2.60007e+06	1255478371	1.83677e+08	2.46361e+07	9.12646e+08	1537653793	9.77805e+07	920948612	1686140354	2166231381	7.71601e+08	1676698290	3.40633e+08	5.56755e+08	2.41171e+08	2.45602e+08	8.19805e+08	2.39424e+07	8.22638e+08	5.27195e+08
2013	27653915141	32123514319	58769284774	26773217886	1093369413	2645899387	3808662189	7.5783e+08	8554039310	8148320305	5089530539	3182977712	12693319490	4306919908	6648850664	1373982249	2407234358	3748862930	1424013926	6900825513	3024940136	1.25356e+08	1844999699	1936862691	1.08153e+06	8754211220	1.12665e+08	2.8852e+08	467810159	2.43676e+06	1341250900	1.85451e+08	2.40948e+07	9.48483e+08	1545025145	9.77091e+07	9.42684e+08	1767806360	2137198734	8.8451e+08	1804338649	3.39142e+08	5.91329e+08	2.4097e+08	2.35164e+08	7.86273e+08	2.32519e+07	6.47156e+08	5.00484e+08
2014	27623687078	31818199430	57695091459	26602490120	1106777398	2599056534	3870299637	8.65188e+08	8245080829	8380081663	4707212687	3252346882	13298148546	4584532571	6669531749	1384696195	2455233703	3730508787	1424633009	7282644681	3134662131	1.22728e+08	1771370402	1886777095	1.09434e+06	8731798654	1.03079e+08	2.796e+08	4.7853e+08	2.31454e+06	1352119039	1.83431e+08	2.5705e+07	891998027	1528864355	1.30654e+08	9.08786e+08	1741717892	2158235449	8.80876e+08	1777867747	3.38036e+08	5.66322e+08	2.40923e+08	2.17893e+08	8.32146e+08	2.30329e+07	6.38865e+08	5.12428e+08
2015	27052089245	31588081760	57137845924	26682408445	1107709369	2576075231	3890683940	8.73315e+08	8269577088	8799232197	5059670548	3266820882	13667921066	4551410418	6471950833	1310069465	2470298392	3760812409	1396826403	7089737225	3217687485	124547702	1790462904	2006236571	1.09979e+06	8420215064	1.04188e+08	2.82548e+08	4.82796e+08	2.01389e+06	1393408555	183471036	2.90048e+07	9.13465e+08	1454454069	8.47618e+07	9.85085e+08	1751602529	2175297921	8.93237e+08	1650004835	3.45558e+08	5.5898e+08	2.25149e+08	2.18815e+08	8.41383e+08	2.82182e+07	644603955	5.00813e+08
2016	26907490731	31473832201	56096671422	27099977632	1107073683	2536604913	3843894957	899806891	8533323236	8653240059	5381524654	3250789804	13776554013	4480560651	6290908424	1302927550	2427582542	3712455555	1431595958	7257793268	3206291789	1.1971e+08	1812697446	2117311143	1.17669e+06	8631560086	1.04701e+08	2.80726e+08	4.90989e+08	1.7526e+06	1398467139	1.91484e+08	2.86131e+07	9.66806e+08	1455979466	8.65727e+07	9.21906e+08	1753185439	2166900384	8.85086e+08	1640117682	3.2637e+08	5.60084e+08	2.24864e+08	2.19773e+08	7.70048e+08	2.33372e+07	6.37354e+08	4.814e+08
House Fly eco-potential WU (RIW weighted) - protein supply	China	United States	India	Russian Federation	Japan	Germany	Islamic Republic of Iran	Saudi Arabia	Indonesia	Canada	Mexico	South Africa	Brazil	Turkey	Australia	United Kingdom	Poland	France	Italy	Kazakhstan	Afghanistan	Albania	Algeria	Angola	Antigua and Barbuda	Argentina	Armenia	Austria	Azerbaijan	Barbados	Belarus	Belgium	Belize	Benin	Bolivia	Botswana	Bulgaria	Burkina Faso	Cameroon	Central African Republic	Chad	Chile	Colombia	Congo	Croatia	Cuba	Cyprus	Czechia	Denmark
2000	8.51766e+08	9.14258e+08	1693833158	8.69081e+08	2.76446e+07	7.44574e+07	1.08086e+08	2.55399e+07	2.31997e+08	2.3015e+08	1.58509e+08	1.07789e+08	3.40966e+08	1.34793e+08	1.38066e+08	3.54402e+07	8.35341e+07	9.31138e+07	4.43438e+07	2.0312e+08	8.70802e+07	3.81008e+06	6.01726e+07	4.52878e+07	33625.1	1.57161e+08	4.10418e+06	7.86169e+06	1.61941e+07	110929	4.21241e+07	5.31798e+06	534832	2.56621e+07	3.33566e+07	3.19949e+06	2.44891e+07	3.19692e+07	6.91026e+07	2.48211e+07	3.39186e+07	1.32694e+07	2.6492e+07	6.76616e+06	7.52278e+06	2.99671e+07	688715	2.1401e+07	1.36101e+07
2001	8.5916e+08	9.26668e+08	1701592701	8.50037e+08	2.73911e+07	7.19253e+07	1.14303e+08	2.59372e+07	2.29605e+08	2.32254e+08	1.57342e+08	1.07177e+08	3.4391e+08	137390949	143076328	3.34333e+07	8.12471e+07	9.17967e+07	4.37153e+07	198519832	9.21645e+07	3.70993e+06	5.84127e+07	4.44101e+07	34496.2	1.63231e+08	4.15487e+06	7.73154e+06	1.58633e+07	105123	3.88041e+07	4.99337e+06	516874	2.70584e+07	3.37934e+07	1.75143e+06	2.44875e+07	3.88645e+07	6.4368e+07	2.44413e+07	3.5855e+07	1.30994e+07	2.27528e+07	6.56679e+06	7.02582e+06	30907755	684869	2.07683e+07	1.26896e+07
2002	8.53669e+08	9.01162e+08	1759130819	8.29274e+08	2.78949e+07	7.09647e+07	1.17272e+08	2.62258e+07	2.24568e+08	2.29928e+08	1.57154e+08	1.09028e+08	3.41413e+08	138223824	1.34931e+08	3.38323e+07	7.70636e+07	9.20872e+07	4.365e+07	1.90476e+08	8.57512e+07	3.51709e+06	5.6273e+07	4.29756e+07	34486.2	1.83601e+08	4.08907e+06	7.78155e+06	1.54448e+07	97666.6	3.87697e+07	4.92583e+06	537550	2.56004e+07	3.47212e+07	2.19915e+06	2.44171e+07	3.95094e+07	6.48263e+07	2.39326e+07	35352684	1.21269e+07	2.07725e+07	6.51696e+06	6.71078e+06	3.22409e+07	703051	2.06944e+07	1.26363e+07
2003	8.49035e+08	8.87988e+08	1752835134	8.113e+08	2.7759e+07	7.19444e+07	1.17406e+08	2.63385e+07	2.49725e+08	2.30761e+08	1.61299e+08	107045842	3.32989e+08	135584462	1.26297e+08	3.27109e+07	7.42333e+07	9.4077e+07	4.24591e+07	1.85177e+08	8.49072e+07	3.59529e+06	5.44179e+07	4.54311e+07	33955.6	1.84664e+08	3.86465e+06	8.05438e+06	1.49856e+07	97290.7	3.8864e+07	5.00174e+06	530305	2.7833e+07	3.65724e+07	1.89788e+06	2.52064e+07	4.00575e+07	6.50757e+07	2.43693e+07	3.55611e+07	1.06793e+07	2.13783e+07	6.20135e+06	6.80505e+06	2.90599e+07	832713	2.06515e+07	1.30627e+07
2004	8.39354e+08	8.69483e+08	1761920293	8.0268e+08	2.84285e+07	7.32891e+07	1.17141e+08	2.55442e+07	2.71913e+08	2.27085e+08	158402863	1.01702e+08	3.39718e+08	1.38063e+08	1.51119e+08	3.35934e+07	7.58173e+07	9.59186e+07	4.24632e+07	1.89404e+08	8.43058e+07	3.61492e+06	5.35067e+07	4.57695e+07	34125.8	1.99835e+08	3.61185e+06	8.17829e+06	1.45768e+07	92687.2	3.7905e+07	5.04284e+06	536513	2.68212e+07	3.83336e+07	2.15454e+06	2.4635e+07	3.65592e+07	6.71809e+07	2.41538e+07	3.60768e+07	1.05371e+07	2.15739e+07	5.98033e+06	6.70751e+06	2.91623e+07	835768	1.99439e+07	1.28074e+07
2005	8.31095e+08	8.60805e+08	1770452529	7.70292e+08	2.81183e+07	7.31521e+07	1.16731e+08	2.49095e+07	2.5498e+08	2.31169e+08	1.59437e+08	9.9457e+07	3.46636e+08	1.37465e+08	149950084	3.29588e+07	7.32858e+07	9.83919e+07	4.16272e+07	1.89115e+08	8.6909e+07	3.26303e+06	5.3208e+07	4.40668e+07	28577.3	2.03991e+08	3.50401e+06	8.01121e+06	1.34079e+07	86381.9	3.70609e+07	5.06034e+06	545995	2.73684e+07	3.91194e+07	2.39813e+06	2.42944e+07	3.99234e+07	6.22236e+07	2.39277e+07	3.69496e+07	1.00613e+07	1.93953e+07	7.27897e+06	6.65768e+06	2.8115e+07	933246	1.92493e+07	1.20167e+07
2006	8.31797e+08	8.5296e+08	1690869950	7.60266e+08	2.87014e+07	7.12865e+07	119848944	2.45948e+07	2.3296e+08	2.26082e+08	1.58152e+08	9.4162e+07	345357559	1.32915e+08	1.38011e+08	3.48869e+07	7.46485e+07	9.84595e+07	3.96364e+07	1.8423e+08	8.68677e+07	3.56415e+06	5.31577e+07	4.28566e+07	29146.9	2.1135e+08	3.33606e+06	8.08777e+06	1.26541e+07	88992.1	3.6278e+07	5.01093e+06	569711	2.56207e+07	3.83697e+07	2.0923e+06	2.34001e+07	3.72101e+07	5.7932e+07	2.32645e+07	3.70912e+07	9.1688e+06	1.77789e+07	6.56237e+06	6.5217e+06	2.69513e+07	898167	2.0028e+07	1.23831e+07
2007	8.1227e+08	8.39307e+08	1623645522	7.35264e+08	2.84345e+07	6.90481e+07	1.19075e+08	2.41445e+07	2.33661e+08	2.21942e+08	1.58076e+08	9.26399e+07	3.46147e+08	1.27553e+08	1.27192e+08	3.47119e+07	7.07357e+07	9.85134e+07	3.8587e+07	1.82206e+08	8.29276e+07	3.54023e+06	5.34827e+07	4.22932e+07	28478.2	2.19651e+08	3.2763e+06	7.90846e+06	1.25875e+07	85561.3	3.57398e+07	4.94076e+06	574023	2.48017e+07	3.92736e+07	1.89088e+06	2.41449e+07	3.82296e+07	5.78754e+07	2.27761e+07	3.81633e+07	8.78441e+06	1.85867e+07	6.6189e+06	6.22581e+06	2.61699e+07	808687	2.00263e+07	1.24254e+07
2008	7.89812e+08	8.4673e+08	1613352464	7.28032e+08	2.87991e+07	7.01966e+07	1.13342e+08	2.4083e+07	2.38966e+08	2.19014e+08	1.55023e+08	9.3948e+07	3.37396e+08	1.27755e+08	1.34303e+08	3.47783e+07	7.32509e+07	9.66881e+07	4.03977e+07	1.7948e+08	8.153e+07	3.56508e+06	5.34717e+07	3.94747e+07	27944	2.11472e+08	3.06352e+06	8.01434e+06	1.24439e+07	89248.4	3.61725e+07	5.11167e+06	601941	2.37309e+07	4.00921e+07	2.77619e+06	2.29964e+07	4.56463e+07	5.82932e+07	2.24339e+07	3.78278e+07	9.14098e+06	1.68243e+07	6.60991e+06	6.20717e+06	2.32464e+07	600060	2.0253e+07	1.3099e+07
2009	7.84651e+08	8.54646e+08	1631359430	727593448	2.9388e+07	6.93961e+07	1.09077e+08	2.29626e+07	2.42695e+08	2.20021e+08	1.52268e+08	9.38453e+07	3.41741e+08	1.26308e+08	1.56508e+08	3.53043e+07	7.14222e+07	9.78299e+07	3.71354e+07	1.79587e+08	8.03487e+07	3.56063e+06	5.1596e+07	4.62875e+07	28563.6	2.0771e+08	3.16586e+06	7.95496e+06	1.24941e+07	90057.8	3.60781e+07	5.2076e+06	622350	2.35434e+07	4.21581e+07	2.93323e+06	2.32915e+07	4.25971e+07	5.69569e+07	2.22796e+07	3.89117e+07	9.50725e+06	1.71857e+07	6.31852e+06	6.14666e+06	2.36006e+07	653600	2.04662e+07	1.39464e+07
2010	7.61387e+08	8.49437e+08	1569921495	7.17936e+08	2.91119e+07	6.92735e+07	1.05474e+08	2.12822e+07	2.35856e+08	215625822	1.47195e+08	9.07034e+07	3.34268e+08	1.23117e+08	1.46104e+08	3.48534e+07	6.37202e+07	9.63611e+07	3.75806e+07	1.72652e+08	7.9865e+07	3.49572e+06	5.20126e+07	4.56281e+07	29232.7	2.27877e+08	3.20077e+06	7.98625e+06	1.26179e+07	82688	3.51332e+07	5.12719e+06	617319	2.4524e+07	3.9444e+07	2.43064e+06	2.37648e+07	4.43001e+07	5.87591e+07	1.98575e+07	4.03111e+07	9.1176e+06	1.7089e+07	6.40819e+06	6.67998e+06	2.56397e+07	605885	2.03599e+07	1.30698e+07
2011	7.51586e+08	8.57725e+08	1558116722	7.15809e+08	2.89977e+07	6.85682e+07	1.04544e+08	2.10825e+07	228755875	2.13819e+08	1.47906e+08	8.58955e+07	3.28038e+08	1.17154e+08	1.78362e+08	3.50914e+07	6.46329e+07	9.73757e+07	3.64399e+07	1.80268e+08	7.88009e+07	3.41293e+06	4.96166e+07	4.9972e+07	28105.5	2.29647e+08	3.1122e+06	7.84447e+06	1.22567e+07	76220.5	3.36024e+07	5.09024e+06	628431	2.39215e+07	3.92281e+07	3.03015e+06	2.3907e+07	4.27149e+07	5.70266e+07	19972158	4.12244e+07	9.20056e+06	1.51103e+07	5.88507e+06	6.53881e+06	2.3606e+07	622515	2.07578e+07	1.39969e+07
2012	7.34068e+08	8.42077e+08	1576136361	7.00521e+08	2.85641e+07	6.92577e+07	1.03252e+08	2.03866e+07	226059850	2.13806e+08	1.38352e+08	8.45857e+07	3.35229e+08	114019514	1.80372e+08	3.57963e+07	6.41078e+07	9.79137e+07	3.88741e+07	1.84224e+08	7.87907e+07	3.31401e+06	4.95968e+07	5.03765e+07	30149.8	2.32292e+08	3.04471e+06	7.80566e+06	1.23423e+07	68447.6	3.30508e+07	4.83533e+06	648552	2.40256e+07	4.04791e+07	2.5741e+06	2.42442e+07	4.43881e+07	5.70266e+07	2.03126e+07	4.41395e+07	8.96725e+06	1.46567e+07	6.34888e+06	6.46553e+06	2.15816e+07	630289	2.16562e+07	1.38785e+07
2013	7.27997e+08	8.4566e+08	1547116728	704811934	2.87832e+07	6.9654e+07	1.00264e+08	1.99501e+07	2.25187e+08	2.14507e+08	133983217	8.37927e+07	3.34155e+08	1.13381e+08	1.75033e+08	3.61704e+07	6.33711e+07	9.86898e+07	3.74875e+07	181666029	7.96323e+07	3.30004e+06	4.85701e+07	5.09884e+07	28471.4	2.30457e+08	2.96595e+06	7.59535e+06	1.23152e+07	64148.3	3.53088e+07	4.88204e+06	634301	2.49691e+07	4.06732e+07	2.57222e+06	2.48164e+07	4.6538e+07	5.62623e+07	2.3285e+07	4.74997e+07	8.92799e+06	1.55669e+07	6.34359e+06	6.19076e+06	2.06988e+07	612112	1.70365e+07	1.31754e+07
2014	727200757	8.37622e+08	1518838309	7.00317e+08	2.91362e+07	6.84208e+07	101886646	2.27763e+07	2.17054e+08	2.20608e+08	123918600	8.56189e+07	350077224	120689014	1.75577e+08	3.64525e+07	6.46347e+07	9.82066e+07	3.75038e+07	191717518	8.25208e+07	3.23083e+06	4.66318e+07	4.96699e+07	28808.7	2.29867e+08	2.71358e+06	7.36055e+06	1.25974e+07	60930.9	3.55949e+07	4.82887e+06	676692	2.34821e+07	4.02478e+07	3.43949e+06	2.3924e+07	4.58512e+07	5.68161e+07	2.31893e+07	4.68028e+07	8.89889e+06	1.49086e+07	6.34236e+06	5.73609e+06	2.19065e+07	606348	1.68183e+07	1.34898e+07
2015	7.12153e+08	8.31564e+08	1504168676	7.02421e+08	2.91607e+07	6.78159e+07	1.02423e+08	2.29902e+07	2.17699e+08	2.31642e+08	133197145	8.59999e+07	3.59812e+08	1.19817e+08	1.70376e+08	3.44879e+07	6.50312e+07	9.90044e+07	3.67718e+07	186639179	8.47065e+07	3.27875e+06	4.71344e+07	5.28147e+07	28952.2	2.21664e+08	2.74279e+06	7.43814e+06	1.27097e+07	53016.2	3.66818e+07	4.82992e+06	763559	2.40472e+07	3.82889e+07	2.23138e+06	2.59326e+07	4.61114e+07	5.72653e+07	2.35147e+07	4.34368e+07	9.09689e+06	1.47153e+07	5.92711e+06	5.76036e+06	2.21496e+07	742851	16969367	1.3184e+07
2016	7.08347e+08	8.28557e+08	1476759486	7.13414e+08	2.9144e+07	66776785	1.01192e+08	2.36877e+07	2.24642e+08	2.27799e+08	1.4167e+08	8.55779e+07	3.62671e+08	1.17952e+08	1.6561e+08	3.42999e+07	6.39067e+07	9.77314e+07	3.76871e+07	1.91063e+08	8.44065e+07	3.15141e+06	4.77197e+07	5.57388e+07	30976.7	2.27228e+08	2.75628e+06	7.39018e+06	1.29254e+07	46137.7	3.6815e+07	5.04087e+06	753248	2.54514e+07	3.8329e+07	2.27905e+06	2.42694e+07	4.61531e+07	5.70442e+07	2.33001e+07	4.31765e+07	8.59179e+06	1.47444e+07	5.91961e+06	5.78559e+06	2.02717e+07	614357	1.67785e+07	1.2673e+07
Spirulina eco-potential WU (RIW weighted) - protein supply	China	United States	India	Russian Federation	Japan	Germany	Islamic Republic of Iran	Saudi Arabia	Indonesia	Canada	Mexico	South Africa	Brazil	Turkey	Australia	United Kingdom	Poland	France	Italy	Kazakhstan	Afghanistan	Albania	Algeria	Angola	Antigua and Barbuda	Argentina	Armenia	Austria	Azerbaijan	Barbados	Belarus	Belgium	Belize	Benin	Bolivia	Botswana	Bulgaria	Burkina Faso	Cameroon	Central African Republic	Chad	Chile	Colombia	Congo	Croatia	Cuba	Cyprus	Czechia	Denmark
2000	8317598033	8927844393	16540489282	8486680153	2.69953e+08	7.27086e+08	1055475699	2.494e+08	2265478690	2247441992	1547859869	1052572512	3329579503	1316269393	1348228953	3.46077e+08	8.1572e+08	9.09267e+08	433023069	1983488678	8.50349e+08	3.72059e+07	5.87593e+08	4.42241e+08	328353	1534697177	4.00778e+07	7.67703e+07	1.58137e+08	1.08323e+06	4.11347e+08	5.19307e+07	5.2227e+06	2.50594e+08	3.25732e+08	3.12434e+07	2.39139e+08	3.12183e+08	674795438	242381520	3.31219e+08	1.29578e+08	2.58698e+08	6.60724e+07	7.34608e+07	2.92633e+08	6.72538e+06	2.08983e+08	1.32904e+08
2001	8389804870	9049029304	16616262180	8300720488	2.67477e+08	7.0236e+08	1116180916	2.5328e+08	2242119979	2267989991	1536467026	1046595333	3358319890	1341639529	1397157955	3.2648e+08	793388007	8.96406e+08	4.26885e+08	1938570595	8.99997e+08	3.6228e+07	5.70408e+08	4.3367e+08	336860	1593973824	4.05728e+07	7.54995e+07	1.54907e+08	1.02654e+06	3.78927e+08	4.87609e+07	5.04733e+06	2.64228e+08	3.29996e+08	1.71029e+07	2.39123e+08	3.79517e+08	6.28561e+08	2.38672e+08	3.50128e+08	1.27917e+08	2.22184e+08	6.41256e+07	6.8608e+07	301818032	6.68783e+06	2.02805e+08	1.23916e+08
2002	8336179064	8799960757	17178128983	8097962798	2.72397e+08	6.92979e+08	1145178431	2.56098e+08	2192934276	2245271423	1534631078	1064675425	3333943834	1349772655	1317622526	3.30376e+08	7.52535e+08	8.99243e+08	4.26248e+08	1860021816	8.37372e+08	3.43448e+07	5.49513e+08	419662128	336762	1792884369	3.99303e+07	7.59878e+07	1.50821e+08	953726	3.78591e+08	4.81013e+07	5.24924e+06	2.49991e+08	3.39056e+08	2.1475e+07	2.38436e+08	3.85815e+08	6.33036e+08	233705220	3.45223e+08	1.18421e+08	2.02846e+08	6.36389e+07	6.55316e+07	3.14836e+08	6.86538e+06	2.02083e+08	1.23395e+08
2003	8290931113	8671308512	17116650845	7922439710	2.7107e+08	702545817	1146482052	2.57199e+08	2438596089	2253411076	1575106887	1045315824	3251680596	1323998961	1233308125	3.19426e+08	7.24897e+08	9.18674e+08	4.14619e+08	1808275790	8.29129e+08	3.51085e+07	5.31398e+08	4.4364e+08	331581	1803267752	3.77388e+07	7.8652e+07	1.46336e+08	950056	3.79512e+08	4.88426e+07	5.1785e+06	2.71793e+08	3.57134e+08	1.8533e+07	2.46144e+08	3.91167e+08	6.35473e+08	2.37969e+08	3.47259e+08	104285082	208762053	6.0557e+07	6.64522e+07	2.83773e+08	8.13155e+06	2.01664e+08	1.27559e+08
2004	8196394812	8490604368	17205368542	7838268380	2.77608e+08	7.15677e+08	1143900985	2.49442e+08	2655262883	2217513401	1546823455	9.93132e+08	3317384191	1348197641	1475698413	3.28043e+08	7.40365e+08	9.36657e+08	4.14658e+08	1849552421	8.23257e+08	3.53001e+07	5.225e+08	4.46945e+08	333242	1951412814	3.52702e+07	7.9862e+07	1.42344e+08	905102	3.70147e+08	4.9244e+07	5.23912e+06	2.61913e+08	3.74332e+08	2.10394e+07	2.40564e+08	3.57005e+08	6.5603e+08	2.35865e+08	3.52294e+08	1.02896e+08	2.10672e+08	5.83986e+07	6.54997e+07	2.84773e+08	8.16138e+06	194754518	1.25066e+08
2005	8115743068	8405864204	17288686871	7521996534	2.74578e+08	7.1434e+08	1139895856	2.43245e+08	2489915882	2257391278	1556923202	9.7121e+08	3384946121	1342363889	1464281028	3.21847e+08	7.15645e+08	9.60809e+08	4.06495e+08	1846730068	8.48677e+08	3.18639e+07	5.19583e+08	4.30317e+08	279061	1991999376	3.42171e+07	7.82304e+07	1.3093e+08	843530	3.61904e+08	4.94149e+07	5.3317e+06	267256254	3.82006e+08	2.34181e+07	2.37238e+08	3.89857e+08	6.07622e+08	2.33657e+08	3.60817e+08	9.82497e+07	1.89398e+08	7.10801e+07	6.50131e+07	2.74547e+08	9.11327e+06	1.87972e+08	1.17344e+08
2006	8122604268	8329261913	16511553194	7424093851	2.80272e+08	6.96121e+08	1170339691	2.40171e+08	2274883895	2207714595	1544371365	9.19503e+08	3372459075	1297931800	1347691149	3.40675e+08	7.28952e+08	9.61469e+08	3.87055e+08	1799024177	8.48274e+08	3.48044e+07	5.19092e+08	418499580	284623	2063860612	32577067	7.89781e+07	1.23569e+08	869018	3.54259e+08	4.89323e+07	5.5633e+06	2.5019e+08	3.74685e+08	2.04315e+07	2.28505e+08	3.63361e+08	5.65713e+08	227180575	362199651	8.95344e+07	1.73613e+08	6.40823e+07	6.36852e+07	2.63183e+08	8.77071e+06	1.95576e+08	1.20923e+08
2007	7931920679	8195931639	15855098382	7179939729	2.77666e+08	6.74264e+08	1162786374	2.35774e+08	2281730330	2167287533	1543634968	9.0464e+08	3380165266	1245572074	1242045467	3.38966e+08	6.90743e+08	9.61995e+08	376806962	1779268755	8.09798e+08	3.45707e+07	5.22266e+08	4.12998e+08	278094	2144917706	3.19935e+07	7.72271e+07	1.22919e+08	835517	3.49004e+08	4.82472e+07	5.60541e+06	2.42192e+08	3.83511e+08	1.84647e+07	2.35778e+08	3.73317e+08	5.6516e+08	2.22411e+08	3.72669e+08	8.57808e+07	1.81502e+08	6.46344e+07	6.07958e+07	2.55552e+08	7.89693e+06	1.95559e+08	1.21335e+08
2008	7712610514	8268418011	15754585399	7109321445	2.81227e+08	6.85479e+08	1106794174	2.35173e+08	2333532865	2138697221	1513816433	9.17414e+08	3294713758	1247546782	1311484900	3.39615e+08	7.15304e+08	9.44172e+08	3.94488e+08	1752640012	7.9615e+08	3.48135e+07	5.22158e+08	3.85475e+08	272877	2065053222	2.99157e+07	7.8261e+07	1.21516e+08	871522	3.53229e+08	4.9916e+07	5.87803e+06	2.31735e+08	3.91504e+08	2.71098e+07	2.24563e+08	4.45741e+08	5.6924e+08	2.1907e+08	3.69393e+08	8.92628e+07	1.64291e+08	6.45466e+07	6.06137e+07	2.27004e+08	5.85966e+06	1.97773e+08	1.27913e+08
2009	7662214011	8345722901	15930425637	7105039581	2.86978e+08	6.77661e+08	1065146496	2.24233e+08	2369943584	2148536479	1486920157	9.16411e+08	3337142710	1233408677	1528317240	3.4475e+08	6.97446e+08	955320617	3.62631e+08	1753686025	784614767	3.477e+07	5.03841e+08	4.52003e+08	278927	2028311437	3.0915e+07	7.76811e+07	122006319	879425	3.52308e+08	5.08528e+07	6.07732e+06	2.29904e+08	4.11679e+08	2.86434e+07	227444399	4.15966e+08	5.56191e+08	2.17563e+08	3.79978e+08	9.28395e+07	1.67821e+08	6.17011e+07	6.00229e+07	2.30463e+08	6.38248e+06	1.99855e+08	1.36189e+08
2010	7435034137	8294853387	15330476648	7010737352	2.84282e+08	6.76464e+08	1029967402	2.07824e+08	2303162215	2105612694	1437376205	8.8573e+08	3264165518	1202250744	1426724711	3.40348e+08	6.22236e+08	9.40978e+08	3.66979e+08	1685970057	7.79891e+08	3.41361e+07	5.07909e+08	4.45564e+08	285461	2225245385	3.12559e+07	7.79867e+07	1.23215e+08	807459	3.4308e+08	5.00676e+07	6.02819e+06	2.3948e+08	3.85175e+08	2.37355e+07	2.32066e+08	4.32596e+08	5.7379e+08	1.93911e+08	3.93643e+08	8.90345e+07	166875890	6.25768e+07	6.52308e+07	2.50375e+08	5.91654e+06	1.98817e+08	1.27629e+08
2011	7339333405	8375792586	15215201584	6989966848	2.83166e+08	6.69577e+08	1020889463	2.05873e+08	2233829277	2087964429	1444320077	8.3878e+08	3203328454	1144020401	1741726458	3.42672e+08	6.31148e+08	9.50885e+08	3.5584e+08	1760339691	7.695e+08	3.33277e+07	4.84512e+08	487982477	274453	2242534775	3.03911e+07	7.66022e+07	1.19688e+08	744302	3.28131e+08	4.97068e+07	6.1367e+06	2.33596e+08	3.83067e+08	2.95898e+07	2.33455e+08	4.17117e+08	5.56872e+08	1.95031e+08	4.02561e+08	8.98446e+07	1.47554e+08	5.74685e+07	6.38523e+07	2.30515e+08	6.07894e+06	2.02703e+08	1.36682e+08
2012	7168263689	8222990073	15391165572	6840669209	278931679	6.7631e+08	1008265554	1.99078e+08	2207502261	2087842150	1351022041	8.2599e+08	3273556420	1113414589	1761357178	3.49555e+08	6.26021e+08	9.56139e+08	3.7961e+08	1798973121	7.69401e+08	3.23617e+07	4.84319e+08	4.91933e+08	294417	2268364855	2.97319e+07	7.62232e+07	1.20524e+08	668399	3.22745e+08	4.72176e+07	6.33319e+06	2.34613e+08	3.95284e+08	2.51364e+07	2.36748e+08	4.33455e+08	5.56872e+08	1.98355e+08	431027838	8.75663e+07	1.43125e+08	6.19976e+07	6.31367e+07	2.10747e+08	6.15485e+06	2.11475e+08	135525682
2013	7108975615	8257972833	15107785289	6882575292	2.81072e+08	6.8018e+08	979090537	1.94815e+08	2198981828	2094683883	1308362606	8.18246e+08	3263064136	1107177354	1709216109	3.53209e+08	6.18826e+08	963717977	366070418	1773991135	7.7762e+08	3.22253e+07	4.74293e+08	4.97908e+08	278027	2250439902	2.89628e+07	7.41696e+07	120259681	626416	3.44795e+08	4.76737e+07	6.19402e+06	2.43826e+08	3.97179e+08	2.5118e+07	2.42335e+08	4.54449e+08	5.49408e+08	2.2738e+08	4.6384e+08	8.71829e+07	1.52013e+08	6.19459e+07	6.04535e+07	2.02127e+08	5.97735e+06	1.66364e+08	128659162
2014	7101204904	8179485715	14831643049	6838686406	2.84519e+08	6.68138e+08	9.94936e+08	2.22413e+08	2119558054	2154262638	1210080382	8.36079e+08	3418547184	1178543077	1714532583	3.55963e+08	6.31165e+08	9.59e+08	3.6623e+08	1872145162	8.05826e+08	3.15495e+07	455365142	4.85033e+08	281321	2244678317	2.64985e+07	7.18767e+07	1.23015e+08	594997	3.47588e+08	4.71545e+07	6.60798e+06	2.29305e+08	3.93024e+08	3.3587e+07	2.33621e+08	4.47742e+08	5.54816e+08	2.26446e+08	4.57035e+08	8.68987e+07	1.45584e+08	6.19339e+07	5.60136e+07	213919309	5.92106e+06	1.64233e+08	1.31729e+08
2015	6954264588	8120329501	14688392268	6859230963	2.84758e+08	6.6223e+08	1000175820	2.24503e+08	2125855292	2262013418	1300686516	8.398e+08	3513604387	1170028385	1663740574	3.36779e+08	6.35038e+08	9.6679e+08	3.59081e+08	1822554556	8.27169e+08	3.20174e+07	4.60273e+08	5.15742e+08	282722	2164579708	2.67836e+07	7.26344e+07	1.24112e+08	517710	3.58203e+08	4.71648e+07	7.45624e+06	2.34824e+08	3.73896e+08	2.17897e+07	2.53235e+08	4.50283e+08	5.59203e+08	2.29624e+08	4.24166e+08	8.88323e+07	1.43697e+08	5.78789e+07	5.62507e+07	2.16294e+08	7.25403e+06	1.65708e+08	1.28744e+08
2016	6917092733	8090959435	14420738155	6966575227	2.84595e+08	6.52084e+08	9.88148e+08	2.31313e+08	2193656359	2224483306	1383425361	8.35679e+08	3541530595	1151815077	1617200109	3.34943e+08	6.24057e+08	9.54359e+08	3.6802e+08	1865756624	8.2424e+08	3.07739e+07	4.65989e+08	5.44296e+08	302491	2218910048	2.69154e+07	7.2166e+07	1.26218e+08	450541	3.59503e+08	4.92247e+07	7.35556e+06	2.48536e+08	3.74288e+08	2.22552e+07	2.36994e+08	4.5069e+08	5.57044e+08	2.27529e+08	4.21624e+08	8.38998e+07	1.4398e+08	5.78058e+07	5.6497e+07	197955818	5.99927e+06	1.63844e+08	1.23753e+08
[truncated: 87 more columns]

## Sheet: 5. Weighted RIW EU
RIW Protein Supply (EU) per (ALU) per capita 2000	China	United States	India	Russian Federation	Japan	Germany	Islamic Republic of Iran	Saudi Arabia	Indonesia	Canada	Mexico	South Africa	Brazil	Turkey	Australia	United Kingdom	Poland	France	Italy	Kazakhstan	Afghanistan	Albania	Algeria	Angola	Antigua and Barbuda	Argentina	Armenia	Austria	Azerbaijan	Barbados	Belarus	Belgium	Belize	Benin	Bolivia	Botswana	Bulgaria	Burkina Faso	Cameroon	Central African Republic	Chad	Chile	Colombia	Congo	Croatia	Cuba	Cyprus	Czechia	Denmark
2000	2.43261e-08	2.26633e-08	1.22327e-08	2.38414e-08	7.49517e-07	2.78281e-07	1.917e-07	8.11284e-07	8.9312e-08	9.00288e-08	1.30719e-07	1.92228e-07	6.07688e-08	1.53718e-07	1.50074e-07	5.84651e-07	2.48044e-07	2.22525e-07	4.6726e-07	1.02009e-07	2.37943e-07	5.43823e-06	3.44345e-07	4.57521e-07	0.00061621	1.3184e-07	5.04854e-06	2.63558e-06	1.27948e-06	0.000186787	4.91883e-07	3.89624e-06	3.87414e-05	8.07419e-07	6.21169e-07	6.47607e-06	8.46096e-07	6.48128e-07	2.99846e-07	8.34777e-07	6.10878e-07	1.56149e-06	7.82126e-07	3.06232e-06	2.75432e-06	6.91428e-07	3.00852e-05	9.68184e-07	1.52241e-06
2001	2.41167e-08	2.23598e-08	1.21769e-08	2.43755e-08	7.56455e-07	2.88078e-07	1.81274e-07	7.98856e-07	9.02425e-08	8.92131e-08	1.31688e-07	1.93326e-07	6.02487e-08	1.50811e-07	1.44819e-07	6.19744e-07	2.55026e-07	2.25717e-07	4.73979e-07	1.04373e-07	2.24817e-07	5.58503e-06	3.54719e-07	4.66563e-07	0.000600649	1.26937e-07	4.98694e-06	2.67994e-06	1.30616e-06	0.000197104	5.33967e-07	4.14952e-06	4.00874e-05	7.65756e-07	6.13141e-07	1.18304e-05	8.46151e-07	5.33137e-07	3.21901e-07	8.4775e-07	5.77887e-07	1.58176e-06	9.10661e-07	3.15529e-06	2.94914e-06	6.70385e-07	3.02541e-05	9.97681e-07	1.63284e-06
2002	2.42718e-08	2.29926e-08	1.17786e-08	2.49858e-08	7.42792e-07	2.91978e-07	1.76684e-07	7.90065e-07	9.22665e-08	9.01158e-08	1.31846e-07	1.90043e-07	6.06892e-08	1.49903e-07	1.5356e-07	6.12436e-07	2.6887e-07	2.25005e-07	4.74687e-07	1.08781e-07	2.4163e-07	5.89127e-06	3.68207e-07	4.82136e-07	0.000600822	1.12854e-07	5.06719e-06	2.66272e-06	1.34156e-06	0.000212151	5.3444e-07	4.20642e-06	3.85454e-05	8.09368e-07	5.96757e-07	9.42185e-06	8.48589e-07	5.24434e-07	3.19625e-07	8.65768e-07	5.86097e-07	1.7086e-06	9.97477e-07	3.17941e-06	3.08759e-06	6.42666e-07	2.94717e-05	1.00124e-06	1.63973e-06
2003	2.44043e-08	2.33338e-08	1.18209e-08	2.55394e-08	7.46429e-07	2.88002e-07	1.76483e-07	7.86684e-07	8.29717e-08	8.97903e-08	1.28458e-07	1.93563e-07	6.22246e-08	1.52821e-07	1.64058e-07	6.33432e-07	2.79122e-07	2.20246e-07	4.88001e-07	1.11894e-07	2.44032e-07	5.76312e-06	3.80759e-07	4.56077e-07	0.000610212	1.12204e-07	5.36144e-06	2.57253e-06	1.38267e-06	0.000212971	5.33144e-07	4.14258e-06	3.9072e-05	7.44444e-07	5.66551e-07	1.09175e-05	8.22018e-07	5.17259e-07	3.184e-07	8.50254e-07	5.82662e-07	1.9402e-06	9.69211e-07	3.34122e-06	3.04481e-06	7.13014e-07	2.48826e-05	1.00332e-06	1.5862e-06
2004	2.46858e-08	2.38304e-08	1.176e-08	2.58137e-08	7.2885e-07	2.82717e-07	1.76881e-07	8.11148e-07	7.62013e-08	9.12438e-08	1.30806e-07	2.03734e-07	6.09922e-08	1.50078e-07	1.37111e-07	6.16792e-07	2.7329e-07	2.16018e-07	4.87955e-07	1.09396e-07	2.45773e-07	5.73183e-06	3.87243e-07	4.52705e-07	0.000607169	1.03686e-07	5.7367e-06	2.53355e-06	1.42145e-06	0.000223549	5.46632e-07	4.10881e-06	3.862e-05	7.72527e-07	5.40521e-07	9.61694e-06	8.41083e-07	5.66754e-07	3.08423e-07	8.5784e-07	5.74334e-07	1.9664e-06	9.60426e-07	3.46471e-06	3.08909e-06	7.1051e-07	2.47917e-05	1.03892e-06	1.61782e-06
2005	2.49311e-08	2.40706e-08	1.17033e-08	2.6899e-08	7.36892e-07	2.83247e-07	1.77503e-07	8.31814e-07	8.12615e-08	8.9632e-08	1.29958e-07	2.08332e-07	5.97748e-08	1.5073e-07	1.3818e-07	6.28667e-07	2.8273e-07	2.10588e-07	4.97754e-07	1.09564e-07	2.38412e-07	6.34996e-06	3.89417e-07	4.70198e-07	0.000725056	1.01574e-07	5.91325e-06	2.58639e-06	1.54536e-06	0.000239866	5.59083e-07	4.0946e-06	3.79493e-05	7.5708e-07	5.29663e-07	8.6401e-06	8.52877e-07	5.18997e-07	3.32994e-07	8.65948e-07	5.60767e-07	2.05939e-06	1.06831e-06	2.84657e-06	3.11221e-06	7.36977e-07	2.22022e-05	1.07641e-06	1.72428e-06
2006	2.491e-08	2.4292e-08	1.22541e-08	2.72538e-08	7.2192e-07	2.9066e-07	1.72885e-07	8.42459e-07	8.89427e-08	9.16488e-08	1.31014e-07	2.20048e-07	5.99961e-08	1.5589e-07	1.50134e-07	5.93923e-07	2.77569e-07	2.10443e-07	5.22754e-07	1.12469e-07	2.38525e-07	5.81347e-06	3.89786e-07	4.83476e-07	0.000710885	9.80369e-08	6.21095e-06	2.56191e-06	1.63742e-06	0.000232831	5.71149e-07	4.13499e-06	3.63695e-05	8.08724e-07	5.40012e-07	9.90305e-06	8.85471e-07	5.56842e-07	3.57662e-07	8.90633e-07	5.58627e-07	2.25985e-06	1.16543e-06	3.15741e-06	3.1771e-06	7.68798e-07	2.30693e-05	1.03456e-06	1.67325e-06
2007	2.55089e-08	2.46872e-08	1.27615e-08	2.81805e-08	7.28696e-07	3.00082e-07	1.74008e-07	8.5817e-07	8.86759e-08	9.33584e-08	1.31077e-07	2.23663e-07	5.98593e-08	1.62443e-07	1.62904e-07	5.96916e-07	2.92923e-07	2.10328e-07	5.36971e-07	1.13718e-07	2.49858e-07	5.85276e-06	3.87417e-07	4.89916e-07	0.000727577	9.4332e-08	6.32424e-06	2.61999e-06	1.64608e-06	0.000242167	5.79749e-07	4.19371e-06	3.60963e-05	8.35431e-07	5.27584e-07	1.09579e-05	8.58155e-07	5.41991e-07	3.58012e-07	9.09732e-07	5.42933e-07	2.35874e-06	1.11478e-06	3.13045e-06	3.3281e-06	7.91753e-07	2.56219e-05	1.03465e-06	1.66756e-06
2008	2.62342e-08	2.44708e-08	1.28429e-08	2.84604e-08	7.19471e-07	2.95172e-07	1.82811e-07	8.60362e-07	8.67073e-08	9.46064e-08	1.33658e-07	2.20549e-07	6.14118e-08	1.62186e-07	1.54279e-07	5.95776e-07	2.82865e-07	2.14298e-07	5.12904e-07	1.15446e-07	2.54141e-07	5.81196e-06	3.87496e-07	5.24896e-07	0.000741487	9.79802e-08	6.76349e-06	2.58538e-06	1.66509e-06	0.000232162	5.72814e-07	4.05349e-06	3.44221e-05	8.73127e-07	5.16813e-07	7.46351e-06	9.01015e-07	4.53928e-07	3.55446e-07	9.23606e-07	5.47748e-07	2.26673e-06	1.23156e-06	3.1347e-06	3.33809e-06	8.91325e-07	3.45301e-05	1.02307e-06	1.58181e-06
2009	2.64068e-08	2.42441e-08	1.27011e-08	2.84776e-08	7.05053e-07	2.98578e-07	1.89959e-07	9.0234e-07	8.53752e-08	9.41731e-08	1.36076e-07	2.2079e-07	6.0631e-08	1.64045e-07	1.3239e-07	5.86901e-07	2.90107e-07	2.11797e-07	5.57962e-07	1.15377e-07	2.57877e-07	5.81922e-06	4.01584e-07	4.47639e-07	0.000725403	9.97551e-08	6.54485e-06	2.60468e-06	1.65839e-06	0.000230076	5.74312e-07	3.97882e-06	3.32933e-05	8.80082e-07	4.91486e-07	7.06392e-06	8.89599e-07	4.86421e-07	3.63786e-07	9.30004e-07	5.3249e-07	2.1794e-06	1.20566e-06	3.27927e-06	3.37095e-06	8.77949e-07	3.17015e-05	1.01241e-06	1.48569e-06
2010	2.72136e-08	2.43928e-08	1.31982e-08	2.88606e-08	7.11739e-07	2.99106e-07	1.96447e-07	9.73586e-07	8.78507e-08	9.60929e-08	1.40766e-07	2.28438e-07	6.19866e-08	1.68296e-07	1.41817e-07	5.94493e-07	3.25173e-07	2.15026e-07	5.51351e-07	1.20011e-07	2.59439e-07	5.92728e-06	3.98367e-07	4.54109e-07	0.000708798	9.09268e-08	6.47347e-06	2.59447e-06	1.64212e-06	0.000250582	5.89759e-07	4.04122e-06	3.35647e-05	8.4489e-07	5.25305e-07	8.52454e-06	8.71882e-07	4.67722e-07	3.52628e-07	1.04344e-06	5.14005e-07	2.27254e-06	1.21248e-06	3.23338e-06	3.10182e-06	8.08125e-07	3.41981e-05	1.01769e-06	1.58534e-06
2011	2.75685e-08	2.4157e-08	1.32982e-08	2.89464e-08	7.14544e-07	3.02182e-07	1.98194e-07	9.82811e-07	9.05774e-08	9.69051e-08	1.4009e-07	2.41225e-07	6.31638e-08	1.76863e-07	1.16169e-07	5.90461e-07	3.20582e-07	2.12785e-07	5.6861e-07	1.14941e-07	2.62943e-07	6.07106e-06	4.17604e-07	4.14635e-07	0.000737227	9.02258e-08	6.6577e-06	2.64136e-06	1.69052e-06	0.000271844	6.16626e-07	4.07055e-06	3.29712e-05	8.66172e-07	5.28196e-07	6.83798e-06	8.66696e-07	4.85079e-07	3.63341e-07	1.03745e-06	5.02618e-07	2.25205e-06	1.37126e-06	3.52079e-06	3.16879e-06	8.77748e-07	3.32845e-05	9.98183e-07	1.48033e-06
2012	2.82264e-08	2.46059e-08	1.31461e-08	2.95782e-08	7.25391e-07	2.99174e-07	2.00676e-07	1.01636e-06	9.16576e-08	9.69108e-08	1.49764e-07	2.4496e-07	6.18087e-08	1.81724e-07	1.14874e-07	5.78834e-07	3.23207e-07	2.11616e-07	5.33006e-07	1.12472e-07	2.62976e-07	6.25228e-06	4.17771e-07	4.11305e-07	0.000687238	8.91984e-08	6.80529e-06	2.6545e-06	1.67879e-06	0.000302715	6.26917e-07	4.28514e-06	3.19483e-05	8.62416e-07	5.11871e-07	8.04946e-06	8.54641e-07	4.66794e-07	3.63341e-07	1.02006e-06	4.69423e-07	2.31064e-06	1.41369e-06	3.26359e-06	3.2047e-06	9.60083e-07	3.2874e-05	9.56776e-07	1.49296e-06
2013	2.84618e-08	2.45017e-08	1.33927e-08	2.93981e-08	7.19867e-07	2.97472e-07	2.06655e-07	1.0386e-06	9.20128e-08	9.65942e-08	1.54647e-07	2.47278e-07	6.20075e-08	1.82748e-07	1.18378e-07	5.72846e-07	3.26965e-07	2.09952e-07	5.5272e-07	1.14056e-07	2.60197e-07	6.27875e-06	4.26602e-07	4.06369e-07	0.000727751	8.99088e-08	6.986e-06	2.728e-06	1.68248e-06	0.000323003	5.86826e-07	4.24415e-06	3.26661e-05	8.29831e-07	5.09429e-07	8.05535e-06	8.34936e-07	4.4523e-07	3.68277e-07	8.8985e-07	4.36216e-07	2.3208e-06	1.33104e-06	3.26631e-06	3.34694e-06	1.00103e-06	3.38502e-05	1.21622e-06	1.57264e-06
2014	2.8493e-08	2.47368e-08	1.36421e-08	2.95867e-08	7.11146e-07	3.02833e-07	2.03364e-07	9.09722e-07	9.54607e-08	9.39228e-08	1.67207e-07	2.42004e-07	5.91873e-08	1.71682e-07	1.18011e-07	5.68414e-07	3.20573e-07	2.10985e-07	5.5248e-07	1.08076e-07	2.5109e-07	6.41324e-06	4.44334e-07	4.17156e-07	0.000719231	9.01396e-08	7.6357e-06	2.81502e-06	1.64479e-06	0.000340059	5.82109e-07	4.29088e-06	3.06197e-05	8.8238e-07	5.14814e-07	6.02418e-06	8.66079e-07	4.51899e-07	3.64687e-07	8.9352e-07	4.42711e-07	2.32839e-06	1.38981e-06	3.26694e-06	3.61224e-06	9.45845e-07	3.4172e-05	1.232e-06	1.53598e-06
2015	2.9095e-08	2.4917e-08	1.37751e-08	2.94981e-08	7.10548e-07	3.05535e-07	2.02299e-07	9.01256e-07	9.51779e-08	8.94488e-08	1.5556e-07	2.40932e-07	5.7586e-08	1.72931e-07	1.21614e-07	6.00793e-07	3.18618e-07	2.09285e-07	5.63478e-07	1.11017e-07	2.44611e-07	6.31951e-06	4.39596e-07	3.92317e-07	0.000715666	9.34751e-08	7.5544e-06	2.78566e-06	1.63026e-06	0.000390826	5.6486e-07	4.28995e-06	2.71362e-05	8.61643e-07	5.41152e-07	9.2858e-06	7.98998e-07	4.49349e-07	3.61827e-07	8.81156e-07	4.77017e-07	2.27771e-06	1.40807e-06	3.49582e-06	3.59701e-06	9.3546e-07	2.78927e-05	1.22103e-06	1.57161e-06
2016	2.92514e-08	2.50075e-08	1.40308e-08	2.90436e-08	7.10956e-07	3.10289e-07	2.04761e-07	8.74722e-07	9.22361e-08	9.09579e-08	1.46256e-07	2.4212e-07	5.71319e-08	1.75666e-07	1.25114e-07	6.04086e-07	3.24224e-07	2.12011e-07	5.49793e-07	1.08446e-07	2.4548e-07	6.57487e-06	4.34204e-07	3.71736e-07	0.000668894	9.11864e-08	7.51741e-06	2.80373e-06	1.60305e-06	0.000449092	5.62817e-07	4.11042e-06	2.75077e-05	8.14104e-07	5.40585e-07	9.09156e-06	8.53754e-07	4.48943e-07	3.63229e-07	8.8927e-07	4.79893e-07	2.41162e-06	1.40529e-06	3.50025e-06	3.58133e-06	1.02212e-06	3.37265e-05	1.23492e-06	1.63498e-06
Cricket eco-potential EU (RIW weighted) - protein supply	China	United States	India	Russian Federation	Japan	Germany	Islamic Republic of Iran	Saudi Arabia	Indonesia	Canada	Mexico	South Africa	Brazil	Turkey	Australia	United Kingdom	Poland	France	Italy	Kazakhstan	Afghanistan	Albania	Algeria	Angola	Antigua and Barbuda	Argentina	Armenia	Austria	Azerbaijan	Barbados	Belarus	Belgium	Belize	Benin	Bolivia	Botswana	Bulgaria	Burkina Faso	Cameroon	Central African Republic	Chad	Chile	Colombia	Congo	Croatia	Cuba	Cyprus	Czechia	Denmark
2000	3946384665	4235923408	7847834555	4026607716	1.28082e+08	3.44975e+08	5.00783e+08	1.18331e+08	1074883677	1066325949	734400776	4.99406e+08	1579759137	6.2452e+08	6.39683e+08	1.64201e+08	3.87028e+08	4.31413e+08	2.05453e+08	9.4109e+08	4.03458e+08	1.76528e+07	2.78791e+08	209826391	155791	7.28156e+08	1.90154e+07	3.64246e+07	7.50302e+07	513954	1.95168e+08	2.46392e+07	2.47797e+06	1.18897e+08	1.54547e+08	1.48238e+07	1.13462e+08	1.48119e+08	320164831	1.15001e+08	1.57151e+08	6.14797e+07	1.22742e+08	3.13488e+07	3.48544e+07	1.38843e+08	3.19094e+06	9.91547e+07	6.30579e+07
2001	3980644069	4293421050	7883785920	3938376910	1.26908e+08	3.33243e+08	5.29585e+08	1.20172e+08	1063800856	1076075195	7.28995e+08	4.9657e+08	1593395361	6.36557e+08	6.62898e+08	1.54903e+08	3.76433e+08	4.25311e+08	2.02541e+08	9.19778e+08	4.27015e+08	1.71888e+07	2.70637e+08	2.0576e+08	159827	7.5628e+08	1.92503e+07	3.58216e+07	7.34976e+07	487053	1.79786e+08	2.31352e+07	2.39477e+06	125366245	1.56571e+08	8.11469e+06	1.13455e+08	1.80066e+08	2.98229e+08	1.13241e+08	166122542	6.06919e+07	1.05418e+08	3.04251e+07	3.25519e+07	1.43201e+08	3.17312e+06	9.62231e+07	5.87933e+07
2002	3955200660	4175247475	8150370398	3842176080	1.29242e+08	3.28792e+08	5.43344e+08	121508952	1040464106	1065296096	7.28124e+08	5.05148e+08	1581829846	6.40416e+08	6.25162e+08	1.56751e+08	3.5705e+08	426656471	2.02239e+08	8.8251e+08	3.97301e+08	1.62953e+07	2.60723e+08	1.99114e+08	159781	8.50656e+08	1.89454e+07	3.60533e+07	7.15587e+07	452507	179627144	2.28223e+07	2.49057e+06	118611129	1.60869e+08	1.01891e+07	1.13129e+08	1.83054e+08	3.00352e+08	1.10884e+08	1.63795e+08	5.61862e+07	9.62429e+07	3.01942e+07	3.10923e+07	1.49378e+08	3.25736e+06	9.58807e+07	5.8546e+07
2003	3933732223	4114206866	8121201355	3758897035	1.28612e+08	3.33331e+08	543962232	122031154	1157021315	1069158052	7.47328e+08	4.95963e+08	1542799062	6.28187e+08	5.85158e+08	1.51555e+08	3.43936e+08	4.35876e+08	1.96721e+08	8.57958e+08	3.9339e+08	1.66576e+07	2.52128e+08	2.10491e+08	157322	8.55582e+08	1.79056e+07	3.73174e+07	6.94308e+07	450765	1.80064e+08	2.3174e+07	2.457e+06	1.28955e+08	1.69446e+08	8.79321e+06	1.16786e+08	1.85594e+08	3.01508e+08	1.12907e+08	1.64761e+08	4.94793e+07	9.90497e+07	2.8732e+07	3.1529e+07	1.3464e+08	3.85811e+06	9.5682e+07	6.0522e+07
2004	3888878336	4028469607	8163294536	3718960932	1.31714e+08	339561747	5.42738e+08	1.18351e+08	1259821487	1052125968	7.33909e+08	4.71204e+08	1573972924	6.39669e+08	7.00163e+08	1.55644e+08	3.51275e+08	4.44408e+08	1.96739e+08	8.77542e+08	3.90604e+08	1.67486e+07	2.47906e+08	2.12058e+08	158111	9.25871e+08	1.67343e+07	3.78915e+07	6.75368e+07	429436	1.75621e+08	2.33644e+07	2.48576e+06	1.24268e+08	1.77606e+08	9.98239e+06	1.14139e+08	1.69386e+08	3.11261e+08	1.11909e+08	1.6715e+08	4.88201e+07	9.99556e+07	2.77079e+07	3.10771e+07	1.35114e+08	3.87226e+06	9.24036e+07	5.93391e+07
2005	3850612144	3988263614	8202825922	3568901942	1.30277e+08	3.38927e+08	5.40837e+08	115410363	1181370609	1071046507	7.38701e+08	4.60802e+08	1606028497	636900731	6.94746e+08	152704146	3.39547e+08	4.55868e+08	1.92866e+08	8.76203e+08	4.02665e+08	1.51182e+07	2.46522e+08	2.04169e+08	132404	9.45128e+08	1.62347e+07	3.71174e+07	6.21214e+07	400223	1.7171e+08	2.34455e+07	2.52969e+06	1.26803e+08	1.81247e+08	1.1111e+07	1.1256e+08	1.84972e+08	288293389	1.10861e+08	1.71194e+08	4.66157e+07	8.9862e+07	3.37248e+07	3.08463e+07	130261906	4.3239e+06	8.91857e+07	5.56755e+07
2006	3853867523	3951918734	7834105479	3522450834	1.32979e+08	3.30283e+08	5.55282e+08	1.13952e+08	1079346090	1047476806	7.32746e+08	4.36269e+08	1600103867	6.15819e+08	6.39428e+08	1.61637e+08	3.4586e+08	4.56181e+08	1.83643e+08	8.53569e+08	4.02474e+08	1.65134e+07	2.46289e+08	1.98562e+08	135043	9.79224e+08	1.54566e+07	3.74721e+07	5.86289e+07	412316	1.68082e+08	2.32165e+07	2.63957e+06	1.18706e+08	1.77774e+08	9.69399e+06	1.08417e+08	1.72401e+08	2.68409e+08	1.07789e+08	1.7185e+08	4.24807e+07	8.2373e+07	3.04046e+07	3.02162e+07	1.2487e+08	4.16137e+06	9.27933e+07	5.73733e+07
2007	3763395395	3888658578	7522642579	3406608967	1.31742e+08	3.19913e+08	5.51698e+08	1.11866e+08	1082594464	1028295699	7.32396e+08	4.29217e+08	1603760162	5.90977e+08	5.89303e+08	1.60827e+08	3.27731e+08	4.5643e+08	178780606	8.44196e+08	384218575	1.64025e+07	2.47795e+08	1.95952e+08	131945	1017682065	15179694	3.66413e+07	5.83202e+07	396421	1.65589e+08	2.28914e+07	2.65955e+06	1.14911e+08	1.81962e+08	8.7608e+06	1.11868e+08	1.77125e+08	2.68147e+08	105525622	1.76817e+08	4.06997e+07	8.61157e+07	3.06666e+07	2.88453e+07	1.2125e+08	3.74679e+06	9.27853e+07	5.7569e+07
2008	3659341043	3923050611	7474952983	3373103271	1.33431e+08	3.25234e+08	5.25132e+08	1.11581e+08	1107172801	1014730681	7.18248e+08	4.35278e+08	1563216664	5.91914e+08	6.2225e+08	1.61134e+08	3.39384e+08	4.47974e+08	187169707	8.31561e+08	377742981	1.65177e+07	2.47744e+08	1.82893e+08	129470	9.79789e+08	1.41939e+07	3.71319e+07	5.76546e+07	413504	1.67594e+08	2.36833e+07	2.7889e+06	1.0995e+08	1.85754e+08	1.28626e+07	1.06546e+08	2.11487e+08	2.70083e+08	1.0394e+08	1.75263e+08	4.23518e+07	7.79498e+07	3.06249e+07	2.87589e+07	107704847	2.78019e+06	9.38356e+07	6.06901e+07
2009	3635429814	3959728848	7558382504	3371071689	1.3616e+08	3.21525e+08	5.05372e+08	1.0639e+08	1124448306	1019399036	7.05487e+08	4.34802e+08	1583347592	5.85206e+08	7.25129e+08	1.63571e+08	330911894	4.53263e+08	1.72055e+08	8.32057e+08	3.7227e+08	1.64971e+07	2.39053e+08	2.14458e+08	132340	9.62357e+08	1.4668e+07	3.68568e+07	5.78874e+07	417254	1.67157e+08	2.41277e+07	2.88346e+06	1.09081e+08	1.95326e+08	1.35902e+07	1.07914e+08	1.9736e+08	2.63892e+08	1.03225e+08	1.80285e+08	4.40488e+07	7.96245e+07	2.92748e+07	2.84786e+07	109345774	3.02824e+06	9.48235e+07	6.46164e+07
2010	3527641584	3935593194	7273729473	3326328859	1.34881e+08	3.20956e+08	4.8868e+08	9.86045e+07	1092763080	9.99033e+08	6.8198e+08	4.20245e+08	1548722684	5.70422e+08	6.76927e+08	1.61482e+08	2.95227e+08	4.46458e+08	1.74118e+08	7.99929e+08	3.70029e+08	1.61963e+07	2.40984e+08	2.11403e+08	135440	1055794501	1.48298e+07	3.70017e+07	5.8461e+07	383108	1.62778e+08	2.37552e+07	2.86015e+06	1.13624e+08	1.82751e+08	1.12616e+07	1.10107e+08	2.0525e+08	2.72241e+08	9.20035e+07	1.86768e+08	4.22435e+07	7.91763e+07	2.96903e+07	30949560	1.18794e+08	2.80718e+06	9.4331e+07	6.0555e+07
2011	3482235218	3973995772	7219035829	3316474043	1.34351e+08	3.17689e+08	484373314	9.7679e+07	1059867232	9.9066e+08	6.85275e+08	3.97969e+08	1519857805	5.42794e+08	8.26383e+08	1.62585e+08	2.99456e+08	4.51159e+08	1.68833e+08	8.35214e+08	365098597	1.58127e+07	2.29883e+08	2.31529e+08	130218	1063997660	1.44194e+07	3.63449e+07	5.67873e+07	353143	1.55686e+08	2.3584e+07	2.91163e+06	1.10832e+08	1.81751e+08	1.40392e+07	1.10765e+08	1.97906e+08	2.64215e+08	9.25346e+07	1.91e+08	4.26279e+07	7.00086e+07	2.72666e+07	3.02955e+07	1.09371e+08	2.88423e+06	9.61747e+07	6.48503e+07
2012	3401069129	3901496778	7302524064	3245637979	1.32342e+08	320883296	4.78384e+08	9.44549e+07	1047376062	9.90602e+08	6.41009e+08	3.91901e+08	1553178310	5.28273e+08	8.35697e+08	1.65851e+08	2.97023e+08	453651698	1.80111e+08	8.53544e+08	3.65052e+08	1.53544e+07	2.29791e+08	2.33403e+08	139690	1076253053	1.41067e+07	3.6165e+07	5.7184e+07	317130	1.5313e+08	2.2403e+07	3.00486e+06	1.11315e+08	1.87547e+08	1.19263e+07	1.12328e+08	2.05658e+08	2.64215e+08	9.41119e+07	2.04506e+08	4.15469e+07	6.79073e+07	2.94155e+07	2.9956e+07	9.99914e+07	2.92024e+06	1.00337e+08	6.43018e+07
2013	3372939187	3918094770	7168070873	3265520825	1.33358e+08	3.2272e+08	4.64541e+08	9.24323e+07	1043333439	9.93848e+08	6.20768e+08	3.88227e+08	1548200120	525313644	8.10958e+08	1.67584e+08	293609605	4.57248e+08	1.73687e+08	8.41691e+08	3.68951e+08	1.52897e+07	2.25034e+08	2.36239e+08	131913	1067748343	1.37418e+07	3.51906e+07	5.70587e+07	297210	1.63592e+08	2.26194e+07	2.93883e+06	1.15686e+08	1.88446e+08	1.19176e+07	1.14979e+08	2.15619e+08	2.60673e+08	1.07883e+08	2.20075e+08	4.1365e+07	7.21242e+07	2.9391e+07	2.86829e+07	9.59015e+07	2.83603e+06	7.89334e+07	6.10439e+07
2014	3369252280	3880855611	7037051857	3244697214	1.34993e+08	3.17006e+08	4.72059e+08	1.05527e+08	1005649872	1022115881	5.74137e+08	3.96688e+08	1621970926	5.59174e+08	8.13481e+08	1.68891e+08	2.99464e+08	4.55009e+08	1.73762e+08	8.88262e+08	3.82334e+08	1.4969e+07	2.16053e+08	230129599	133476	1065014690	1.25725e+07	3.41028e+07	5.83662e+07	282304	1.64918e+08	2.2373e+07	3.13524e+06	1.08797e+08	1.86475e+08	1.59358e+07	1.10844e+08	2.12437e+08	2.63239e+08	1.0744e+08	2.16846e+08	4.12301e+07	6.90741e+07	2.93853e+07	2.65763e+07	1.01497e+08	2.80932e+06	7.79221e+07	6.25006e+07
2015	3299534675	3852788232	6969084798	3254444826	1.35107e+08	3.14203e+08	4.74545e+08	1.06518e+08	1008637673	1073239538	6.17126e+08	3.98453e+08	1667071962	5.55134e+08	7.89382e+08	1.59789e+08	301301505	458705087	1.7037e+08	8.64733e+08	3.9246e+08	1.5191e+07	2.18382e+08	2.447e+08	134141	1027010939	1.27078e+07	3.44623e+07	5.88865e+07	245634	1.69954e+08	2.23779e+07	3.5377e+06	1.11415e+08	1.77399e+08	1.03384e+07	1.2015e+08	2.13642e+08	2.6532e+08	1.08948e+08	2.01251e+08	4.21475e+07	6.81787e+07	2.74614e+07	2.66888e+07	1.02623e+08	3.44176e+06	7.86221e+07	6.1084e+07
2016	3281898041	3838853250	6842093077	3305375607	1.35029e+08	3.09389e+08	4.68839e+08	1.09749e+08	1040806707	1055432923	6.56383e+08	396497793	1680321888	5.46493e+08	7.673e+08	1.58918e+08	2.96091e+08	452807017	1.74611e+08	8.85231e+08	3.9107e+08	1.4601e+07	2.21094e+08	2.58248e+08	143520	1052788624	1.27704e+07	3.424e+07	5.98857e+07	213765	1.70571e+08	2.33553e+07	3.48993e+06	1.17921e+08	1.77585e+08	1.05592e+07	1.12445e+08	2.13835e+08	264296147	1.07954e+08	2.00045e+08	3.98073e+07	6.83133e+07	2.74266e+07	2.68057e+07	9.39225e+07	2.84643e+06	7.77379e+07	5.87162e+07
Mealworm eco-potential EU (RIW weighted) - protein supply	China	United States	India	Russian Federation	Japan	Germany	Islamic Republic of Iran	Saudi Arabia	Indonesia	Canada	Mexico	South Africa	Brazil	Turkey	Australia	United Kingdom	Poland	France	Italy	Kazakhstan	Afghanistan	Albania	Algeria	Angola	Antigua and Barbuda	Argentina	Armenia	Austria	Azerbaijan	Barbados	Belarus	Belgium	Belize	Benin	Bolivia	Botswana	Bulgaria	Burkina Faso	Cameroon	Central African Republic	Chad	Chile	Colombia	Congo	Croatia	Cuba	Cyprus	Czechia	Denmark
2000	3778663317	4055896663	7514301587	3855476888	1.22639e+08	3.30313e+08	4.795e+08	1.13302e+08	1029201121	1021007096	703188743	4.78181e+08	1512619374	5.97978e+08	6.12497e+08	1.57222e+08	3.7058e+08	4.13078e+08	1.96721e+08	9.01094e+08	3.86311e+08	1.69025e+07	266941950	2.00909e+08	149170	697208966	1.82073e+07	3.48766e+07	7.18414e+07	492111	1.86874e+08	2.3592e+07	2.37266e+06	1.13844e+08	1.47979e+08	1.41938e+07	1.0864e+08	1.41824e+08	3.06558e+08	1.10113e+08	1.50472e+08	5.88668e+07	117525882	3.00165e+07	3.33731e+07	1.32942e+08	3.05532e+06	9.49406e+07	6.0378e+07
2001	3811466696	4110950655	7548725019	3770995892	1.21514e+08	319080128	5.07078e+08	1.15065e+08	1018589319	1030341999	6.98013e+08	4.75466e+08	1525676058	6.09503e+08	6.34725e+08	1.48319e+08	3.60434e+08	4.07235e+08	1.93933e+08	8.80688e+08	408866415	1.64583e+07	2.59135e+08	197015382	153035	7.24138e+08	1.84321e+07	3.42992e+07	7.0374e+07	466353	1.72146e+08	2.21519e+07	2.29299e+06	1.20038e+08	1.49917e+08	7.76981e+06	1.08633e+08	1.72413e+08	2.85554e+08	1.08428e+08	159062334	58112525	100937671	2.91321e+07	3.11685e+07	1.37115e+08	3.03826e+06	9.21336e+07	5.62946e+07
2002	3787104632	3997799457	7803979657	3678883597	1.23749e+08	3.14818e+08	5.20252e+08	1.16345e+08	9.96244e+08	1020021012	6.97179e+08	4.83679e+08	1514602078	6.13198e+08	5.98593e+08	1.50089e+08	341874929	408523571	1.93643e+08	8.45003e+08	3.80416e+08	1.56028e+07	2.49642e+08	1.90651e+08	152990	8.14503e+08	1.81402e+07	3.4521e+07	6.85174e+07	433275	1.71993e+08	2.18523e+07	2.38472e+06	113570156	1.54032e+08	9.75604e+06	1.08321e+08	1.75275e+08	2.87587e+08	1.06172e+08	156834059	53798298	9.21525e+07	2.8911e+07	2.97708e+07	1.43029e+08	3.11893e+06	9.18058e+07	5.60578e+07
2003	3766548604	3939353075	7776050297	3599143911	1.23146e+08	3.19165e+08	5.20844e+08	1.16845e+08	1107847909	1023718835	7.15567e+08	4.74884e+08	1477230101	6.01489e+08	5.60289e+08	1.45114e+08	329318891	4.17351e+08	1.8836e+08	821495024	3.76671e+08	1.59497e+07	2.41413e+08	2.01545e+08	150636	819219885	1.71446e+07	3.57314e+07	6.648e+07	431608	1.72411e+08	2.21891e+07	2.35258e+06	1.23475e+08	1.62245e+08	8.4195e+06	1.11822e+08	1.77706e+08	2.88694e+08	108108851	1.57759e+08	4.73764e+07	9.48401e+07	2.75109e+07	3.01891e+07	1.28917e+08	3.69414e+06	9.16155e+07	5.79498e+07
2004	3723601006	3857259649	7816354518	3560905093	1.26116e+08	3.2513e+08	5.19671e+08	1.13321e+08	1206279074	1007410614	7.02718e+08	4.51178e+08	1507079075	6.12483e+08	670405980	1.49029e+08	3.36346e+08	4.25521e+08	1.88378e+08	8.40247e+08	3.74003e+08	1.60368e+07	2.3737e+08	2.03046e+08	151391	8.86522e+08	1.60231e+07	3.62811e+07	6.46664e+07	411185	1.68157e+08	2.23714e+07	2.38012e+06	1.18986e+08	1.70058e+08	9.55814e+06	1.09288e+08	1.62187e+08	2.98033e+08	1.07153e+08	160046222	4.67453e+07	9.57075e+07	2.65304e+07	2.97563e+07	1.29372e+08	3.70769e+06	8.84765e+07	5.68172e+07
2005	3686961128	3818762411	7854205820	3417223609	1.2474e+08	3.24523e+08	5.17852e+08	1.10505e+08	1131162358	1025527031	7.07306e+08	4.41218e+08	1537772286	609832450	6.65219e+08	1.46214e+08	3.25116e+08	4.36493e+08	1.84669e+08	8.38965e+08	385551788	1.44757e+07	2.36045e+08	1.95492e+08	126776	9.0496e+08	1.55447e+07	3.55399e+07	5.94813e+07	383214	1.64412e+08	2.24491e+07	2.42218e+06	1.21414e+08	1.73544e+08	1.06388e+07	1.07776e+08	1.77111e+08	276040920	1.0615e+08	1.63918e+08	4.46346e+07	8.60428e+07	3.22915e+07	2.95353e+07	124725775	4.14013e+06	8.53953e+07	5.33093e+07
2006	3690078153	3783962188	7501155996	3372746673	1.27327e+08	3.16246e+08	5.31682e+08	1.09109e+08	1033473881	1002959042	7.01604e+08	417727961	1532099453	5.89647e+08	6.12253e+08	1.54768e+08	3.31161e+08	4.36793e+08	1.75838e+08	817292040	3.85368e+08	1.58115e+07	2.35822e+08	190123279	129304	937606549	1.47997e+07	3.58795e+07	5.61371e+07	394793	1.60939e+08	2.22298e+07	2.52739e+06	1.13661e+08	1.70218e+08	9.28199e+06	1.03809e+08	1.65074e+08	2.57002e+08	1.03208e+08	1.64546e+08	4.06753e+07	7.88722e+07	2.91124e+07	2.8932e+07	119563291	3.98451e+06	8.88496e+07	5.49349e+07
2007	3603451090	3723390588	7202930270	3261828086	1.26143e+08	3.06316e+08	5.28251e+08	107111669	1036584199	9.84593e+08	7.01269e+08	4.10975e+08	1535600355	5.6586e+08	5.64258e+08	1.53992e+08	3.13803e+08	437031865	1.71182e+08	8.08317e+08	3.67889e+08	1.57054e+07	2.37264e+08	1.87624e+08	126337	9.74431e+08	1.45346e+07	3.50841e+07	5.58416e+07	379573	1.58551e+08	2.19186e+07	2.54652e+06	1.10027e+08	1.74228e+08	8.38847e+06	1.07113e+08	1.69597e+08	2.56751e+08	1.01041e+08	1.69303e+08	3.897e+07	8.24558e+07	2.93632e+07	2.76194e+07	1.16097e+08	3.58756e+06	8.88419e+07	5.51223e+07
2008	3503819048	3756320960	7157267481	3229746382	1.2776e+08	3.11411e+08	5.02814e+08	1.06839e+08	1060117957	9.71605e+08	6.87723e+08	4.16779e+08	1496779956	5.66757e+08	5.95804e+08	1.54286e+08	3.24961e+08	4.28935e+08	1.79215e+08	7.9622e+08	3.61689e+08	1.58157e+07	2.37215e+08	1.75121e+08	123967	9.38148e+08	1.35906e+07	3.55538e+07	5.52043e+07	395930	1.60471e+08	2.26767e+07	2.67037e+06	1.05277e+08	1.77859e+08	12315929	1.02018e+08	2.02499e+08	258604373	9.9523e+07	1.67814e+08	4.05519e+07	7.46369e+07	2.93233e+07	2.75367e+07	103127391	2.66203e+06	8.98476e+07	5.81108e+07
2009	3480924047	3791440372	7237151247	3227801142	1.30373e+08	3.0786e+08	4.83893e+08	1.01868e+08	1076659253	9.76075e+08	6.75504e+08	4.16323e+08	1516055319	5.60334e+08	6.94311e+08	1.56619e+08	3.16848e+08	4.34e+08	1.64742e+08	7.96695e+08	3.56448e+08	1.57959e+07	228893676	2.05344e+08	126716	9.21457e+08	1.40446e+07	3.52903e+07	5.54272e+07	399521	1.60052e+08	2.31023e+07	2.76091e+06	1.04445e+08	1.87025e+08	1.30126e+07	1.03327e+08	1.88972e+08	2.52676e+08	9.88383e+07	1.72623e+08	4.21767e+07	7.62405e+07	2.80306e+07	2.72682e+07	1.04699e+08	2899544	9.07935e+07	6.18702e+07
2010	3377716817	3768330483	6964595970	3184959883	1.29148e+08	3.07316e+08	4.67912e+08	9.44138e+07	1046320650	9.56574e+08	6.52996e+08	4.02385e+08	1482901970	5.46179e+08	6.48157e+08	1.54619e+08	2.8268e+08	4.27484e+08	1.66718e+08	7.65932e+08	3.54303e+08	1.5508e+07	2.30742e+08	2.02419e+08	129684	1010923235	1.41995e+07	3.54292e+07	5.59764e+07	366826	1.5586e+08	2.27456e+07	2.73859e+06	108795263	1.74984e+08	1.0783e+07	1.05427e+08	1.96527e+08	2.60671e+08	8.80933e+07	1.78831e+08	4.04481e+07	7.58113e+07	2.84285e+07	2.96342e+07	1.13745e+08	2.68787e+06	9.03219e+07	5.79814e+07
2011	3334240221	3805100952	6912226806	3175523897	1.28642e+08	3.04187e+08	4.63787e+08	9.35277e+07	1014822875	9.48557e+08	6.56151e+08	3.81056e+08	1455263848	5.19726e+08	791261834	1.55675e+08	2.86729e+08	4.31985e+08	1.61657e+08	7.99718e+08	3.49582e+08	1.51407e+07	2.20113e+08	2.21689e+08	124683	1018777760	1.38066e+07	3.48002e+07	5.43739e+07	338135	1.49069e+08	2.25817e+07	2.78789e+06	1.06122e+08	1.74026e+08	1.34426e+07	1.06058e+08	1.89495e+08	2.52985e+08	8.86019e+07	1.82882e+08	4.08162e+07	6.70332e+07	2.61078e+07	2.90079e+07	1.04723e+08	2.76165e+06	9.20873e+07	6.20942e+07
2012	3256523691	3735683165	6992166792	3107698364	1.26718e+08	3.07246e+08	4.58052e+08	9.04405e+07	1002862579	9.48501e+08	6.13766e+08	375245197	1487168232	5.05821e+08	8.0018e+08	1.58802e+08	2.844e+08	4.34372e+08	1.72456e+08	8.17269e+08	3.49537e+08	1.47018e+07	2.20025e+08	2.23484e+08	133753	1030512298	1.35071e+07	3.4628e+07	5.47537e+07	303652	1.46622e+08	2.14509e+07	2.87715e+06	1.06584e+08	1.79576e+08	1.14194e+07	1.07554e+08	1.96918e+08	2.52985e+08	9.01121e+07	1.95815e+08	3.97811e+07	6.50212e+07	2.81653e+07	28682842	9.57418e+07	2.79613e+06	9.60726e+07	6.1569e+07
2013	3229589272	3751575742	6863427861	3126736190	1.2769e+08	3.09004e+08	4.44798e+08	8.85039e+07	9.98992e+08	9.51609e+08	594385755	3.71727e+08	1482401614	5.02988e+08	7.76492e+08	1.60462e+08	2.81131e+08	4.37815e+08	166304846	8.0592e+08	3.53271e+08	1.46399e+07	2.1547e+08	2.26198e+08	126307	1022369039	1.31577e+07	3.3695e+07	5.46337e+07	284579	1.56639e+08	2.1658e+07	2.81393e+06	1.1077e+08	1.80437e+08	1.14111e+07	1.10092e+08	2.06455e+08	2.49595e+08	1.03298e+08	2.10721e+08	3.9607e+07	6.90589e+07	2.81419e+07	2.74639e+07	9.18257e+07	2.71549e+06	7.55787e+07	5.84495e+07
2014	3226059058	3715919247	6737977154	3106797582	1.29256e+08	3.03533e+08	4.51997e+08	1.01042e+08	9.6291e+08	978675956	5.49736e+08	3.79828e+08	1553037162	535409078	778907727	1.61713e+08	2.86737e+08	435671083	1.66377e+08	8.50511e+08	366084554	1.43329e+07	2.06871e+08	2.20349e+08	127803	1019751566	1.20382e+07	3.26534e+07	5.58856e+07	270306	157908532	2.14222e+07	3.00199e+06	1.04173e+08	1.7855e+08	1.52585e+07	1.06133e+08	2.03408e+08	2.52052e+08	1.02874e+08	2.0763e+08	3.94779e+07	6.61384e+07	2.81364e+07	2.54468e+07	9.7183e+07	2.68992e+06	7.46104e+07	5.98444e+07
2015	3159304452	3689044732	6672898694	3116130921	1.29365e+08	3.00849e+08	4.54377e+08	1.01991e+08	9.65771e+08	1027626857	590898527	3.81519e+08	1596221404	5.31541e+08	7.55833e+08	1.52998e+08	2.88496e+08	4.3921e+08	1.6313e+08	8.27982e+08	3.75781e+08	1.45454e+07	2.09101e+08	2.343e+08	128440	9.83363e+08	1.21677e+07	3.29976e+07	5.63838e+07	235194	1.62731e+08	2.14268e+07	3.38735e+06	1.0668e+08	1.6986e+08	9.89899e+06	1.15044e+08	2.04563e+08	2.54044e+08	1.04318e+08	1.92697e+08	4.03563e+07	6.52811e+07	2.62943e+07	2.55545e+07	9.82618e+07	3.29549e+06	7.52807e+07	5.84879e+07
2016	3142417374	3675701987	6551304121	3164897143	1.29291e+08	2.9624e+08	4.48913e+08	1.05085e+08	9.96572e+08	1010577024	6.28487e+08	3.79647e+08	1608908208	5.23267e+08	7.3469e+08	1.52164e+08	2.83508e+08	4.33563e+08	1.6719e+08	8.47608e+08	3.7445e+08	1.39805e+07	2.11698e+08	2.47272e+08	137421	1008045107	1.22276e+07	3.27848e+07	5.73406e+07	204680	1.63321e+08	2.23627e+07	3.34161e+06	1.12909e+08	1.70038e+08	1.01105e+07	1.07666e+08	204747460	2.53064e+08	1.03366e+08	1.91543e+08	3.81155e+07	6.541e+07	2.6261e+07	2.56664e+07	8.99308e+07	2.72545e+06	7.4434e+07	5.62207e+07
Cultured Meat eco-potential EU (RIW weighted) - protein supply	China	United States	India	Russian Federation	Japan	Germany	Islamic Republic of Iran	Saudi Arabia	Indonesia	Canada	Mexico	South Africa	Brazil	Turkey	Australia	United Kingdom	Poland	France	Italy	Kazakhstan	Afghanistan	Albania	Algeria	Angola	Antigua and Barbuda	Argentina	Armenia	Austria	Azerbaijan	Barbados	Belarus	Belgium	Belize	Benin	Bolivia	Botswana	Bulgaria	Burkina Faso	Cameroon	Central African Republic	Chad	Chile	Colombia	Congo	Croatia	Cuba	Cyprus	Czechia	Denmark
2000	17984003786	19303455964	35763236054	18349586911	5.83683e+08	1572078443	2282110641	5.39244e+08	4898334492	4859336208	3346725536	2275833475	7199094035	2845989149	2915090930	7.48276e+08	1763720372	1965984656	9.36267e+08	4288626086	1838593875	8.04452e+07	1270471761	9.56196e+08	709952	3318265649	8.66548e+07	1.6599e+08	3.41919e+08	2.34213e+06	8.89399e+08	112282744	1.12923e+07	5.41825e+08	7.04285e+08	6.75533e+07	5.17057e+08	6.7499e+08	1459017815	5.24068e+08	716149334	2.80168e+08	559347507	1.42859e+08	1.58834e+08	6.3272e+08	1.45414e+07	4.51856e+08	2.8736e+08
2001	18140126745	19565477509	35927069420	17947511778	5.78329e+08	1518615910	2413365222	5.47633e+08	4847829149	4903764335	3322092351	2262909839	7261235441	2900843521	3020883415	7.05904e+08	1715434295	1938175720	922994844	4191505863	1945940810	7.83308e+07	1233314083	9.37666e+08	728346	3446431429	8.77251e+07	1.63242e+08	3.34935e+08	2.21954e+06	8.19302e+08	1.05429e+08	1.09132e+07	5.71304e+08	7.13506e+08	3.69793e+07	5.17023e+08	8.20577e+08	1359052484	5.16049e+08	7.57034e+08	2.76578e+08	4.80398e+08	1.3865e+08	1.48342e+08	6.5258e+08	1.44602e+07	4.38497e+08	2.67926e+08
2002	18024179006	19026950681	37141917103	17509116579	5.88967e+08	1498333182	2476062580	5.53726e+08	4741481636	4854643085	3318122733	2302001948	7208530429	2918428667	2848914843	7.14327e+08	1627104482	1944309093	9.21618e+08	4021670589	1810533800	7.4259e+07	1188136047	9.07378e+08	728135	3876508477	8.63358e+07	1.64298e+08	3.26099e+08	2.06211e+06	8.18576e+08	1.04003e+08	1.13497e+07	5.40521e+08	7.33095e+08	4.64325e+07	5.15538e+08	834194077	1368728104	5.05309e+08	7.46429e+08	2.56045e+08	438586700	1.37598e+08	1.4169e+08	6.80727e+08	1.48441e+07	4.36936e+08	2.66799e+08
2003	17926345553	18748783541	37008991341	17129607028	5.86097e+08	1519018662	2478881221	556106138	5272642550	4872242341	3405638035	2260143332	7030663890	2862701735	2666613354	6.9065e+08	1567345827	1986321978	8.96473e+08	3909787240	1792712353	7.59103e+07	1148968136	9.59223e+08	716932	3898959044	8.15975e+07	1.70058e+08	3.16402e+08	2.05418e+06	8.20567e+08	105605688	1.11968e+07	5.8766e+08	7.72181e+08	4.00714e+07	5.32203e+08	8.45766e+08	1373995337	5.14529e+08	750830143	2.25481e+08	4.51378e+08	1.30934e+08	1.4368e+08	6.13564e+08	1.75817e+07	4.36031e+08	2.75804e+08
2004	17721942649	18358071704	37200813474	16947614882	6.00233e+08	1547411178	2473300532	5.39334e+08	5741111503	4794625712	3344484641	2147314466	7172725781	2915023230	3190700698	7.09283e+08	1600790082	2025205878	8.96558e+08	3999034049	1780015703	7.63246e+07	1129729294	9.66368e+08	720524	4219272836	7.62598e+07	1.72675e+08	3.07771e+08	1.95698e+06	8.00319e+08	1.06474e+08	1.13278e+07	5.66298e+08	809367183	4.54906e+07	5.20139e+08	7.71904e+08	1418443540	5.09979e+08	7.61717e+08	2.22477e+08	4.55506e+08	1.26267e+08	1.41621e+08	6.15726e+08	1.76462e+07	421091038	2.70413e+08
2005	17547560423	18174849645	37380961294	16263783558	5.93683e+08	1544519032	2464640789	5.25935e+08	5383604314	4880848187	3366321940	2099913831	7318805695	2902409706	3166014449	6.95886e+08	1547341808	2077426202	878907818	3992931662	1834978201	6.88949e+07	1123422407	9.30416e+08	603374	4307027603	7.3983e+07	1.69147e+08	2.83093e+08	1.82385e+06	7.82495e+08	106843045	1.1528e+07	5.77852e+08	8.25959e+08	5.06337e+07	5.12946e+08	8.42934e+08	1313776998	5.05204e+08	780146142	212431782	4.09508e+08	1.53687e+08	1.40569e+08	5.93614e+08	1.97044e+07	4.06427e+08	2.53718e+08
2006	17562395457	18009222996	35700671511	16052101987	6.05995e+08	1505127161	2530465327	5.1929e+08	4918670079	4773439096	3339182822	1988116061	7291806664	2806340281	2913928112	736593902	1576112752	2078853490	8.36875e+08	3889783743	1834105866	7.52528e+07	1122360732	9.04864e+08	615402	4462403319	7.04369e+07	1.70764e+08	2.67177e+08	1.87896e+06	7.65965e+08	1.058e+08	1.20288e+07	5.40951e+08	8.1013e+08	4.41763e+07	4.94065e+08	7.85645e+08	1223164301	4.91201e+08	7.83135e+08	1.93588e+08	3.75381e+08	1.38556e+08	1.37698e+08	569044262	1.89637e+07	422866911	2.61455e+08
2007	17150106430	17720941194	34281309121	15524200947	6.0036e+08	1457868043	2514133824	5.09783e+08	4933473190	4686029192	3337590611	1955978450	7308468706	2693130013	2685504912	7.32901e+08	1493498910	2079990212	8.14718e+08	3847069298	1750916064	7.47476e+07	1129223455	8.92969e+08	601284	4637661977	6.91751e+07	1.66978e+08	2.6577e+08	1.80652e+06	754602633	104318237	1.21198e+07	5.23658e+08	8.29214e+08	3.99237e+07	5.09791e+08	8.07172e+08	1221968832	4.80889e+08	8.05771e+08	1.85472e+08	3.92436e+08	139750051	1.3145e+08	552545965	1.70745e+07	4.2283e+08	262346739
2008	16675922077	17877668554	34063983655	15371512697	6.08058e+08	1482117055	2393069553	5.08483e+08	5045478720	4624212273	3273118074	1983598976	7123708607	2697399654	2835644294	7.34303e+08	1546603052	2041452844	8.52948e+08	3789493611	1721406243	7.52724e+07	1128990903	8.33461e+08	590004	4464981935	6.46826e+07	1.69213e+08	2.62737e+08	1.88437e+06	7.63738e+08	1.07927e+08	1.27093e+07	5.0105e+08	8.46495e+08	5.86159e+07	4.85541e+08	9.63766e+08	1230790264	473665398	7.98688e+08	193000794	3.55224e+08	1.3956e+08	1.31057e+08	4.9082e+08	1.26695e+07	4.27617e+08	2.7657e+08
2009	16566956617	18044814337	34444178935	15362254608	6.20492e+08	1465214118	2303020479	4.84828e+08	5124204635	4645486356	3214963938	1981429646	7215446923	2666830763	3304471186	7.45407e+08	1507993077	2065559014	7.84068e+08	3791755263	1696465119	7.51785e+07	1089386482	9.77305e+08	603085	4385540202	6.68434e+07	1.67959e+08	2.63798e+08	1.90146e+06	761746365	1.09952e+08	1.31402e+07	4.9709e+08	8.90118e+08	6.19317e+07	4.91772e+08	8.99386e+08	1202575611	4.70406e+08	8.21574e+08	2.00734e+08	3.62856e+08	1.33408e+08	1.29779e+08	4.98298e+08	1.38e+07	4.32119e+08	2.94462e+08
2010	16075756670	17934826150	33146991352	15158357806	6.14663e+08	1462625426	2226957541	4.49349e+08	4979812421	4552678130	3107841832	1915093036	7057658330	2599462231	3084811566	7.35888e+08	1345375094	2034546948	7.9347e+08	3645342293	1686252481	7.38079e+07	1098182866	9.63382e+08	617214	4811343523	6.75804e+07	1.6862e+08	2.66412e+08	1.74586e+06	7.41795e+08	1.08254e+08	1.30339e+07	5.17795e+08	832811469	5.13201e+07	5.01765e+08	9.35343e+08	1240626867	419267579	8.51119e+08	1.92507e+08	3.60813e+08	1.35301e+08	1.4104e+08	5.41352e+08	1.27925e+07	4.29874e+08	2.75954e+08
2011	15868836076	18109829902	32897747859	15113448589	6.12251e+08	1447734616	2207329556	4.45132e+08	4829903298	4514519702	3122855616	1813578907	6926118673	2473558730	3765896727	7.40912e+08	1364644687	2055969140	7.69385e+08	3806141574	1663784731	72059875	1047595021	1055097719	593413	4848726005	6.57104e+07	1.65627e+08	258784537	1.6093e+06	7.09474e+08	1.07474e+08	1.32686e+07	5.05073e+08	828252953	6.3978e+07	5.04767e+08	9.01874e+08	1204047717	4.21688e+08	870402792	1.94259e+08	3.19035e+08	1.24256e+08	138059060	4.98412e+08	1.31437e+07	438276243	2.95528e+08
2012	15498955444	17779445941	33278210705	14790642738	6.03096e+08	1462291920	2180034605	4.30439e+08	4772979995	4514255314	2921130044	1785925466	7077962992	2407383971	3808341546	7.55795e+08	1353559151	2067328592	8.20779e+08	3889673352	1663571179	6.99712e+07	1047177280	1063638715	636577	4904574851	6.42853e+07	1.64807e+08	2.60592e+08	1.44519e+06	6.97828e+08	1.02092e+08	1.36934e+07	5.07272e+08	8.54668e+08	5.4349e+07	5.11887e+08	9.37201e+08	1204047717	4.28876e+08	9.31952e+08	1.89333e+08	3.09459e+08	1.34049e+08	1.36512e+08	4.55669e+08	1.33078e+07	4.57244e+08	2.93029e+08
2013	15370764956	17855084375	32665496306	14881250526	6.07723e+08	1470659665	2116953459	4.21222e+08	4754557428	4529048258	2828893387	1769181760	7055276961	2393898052	3695604049	7.63695e+08	1338003437	2083715476	7.91504e+08	3835658221	1681340367	6.96763e+07	1025498797	1076558636	601140	4865818180	6.26223e+07	1.60367e+08	2.60021e+08	1.35441e+06	7.45502e+08	1.03078e+08	1.33925e+07	5.27192e+08	8.58765e+08	5.43093e+07	5.23968e+08	9.82593e+08	1187910617	4.91634e+08	1002898329	1.88504e+08	3.28676e+08	1.33937e+08	1.3071e+08	4.37031e+08	1.2924e+07	3.59706e+08	2.78182e+08
2014	15353963413	17685382423	32068431736	14786355595	615175651	1444623190	2151213155	4.80894e+08	4582830273	4657867246	2616391185	1807738949	7391456675	2548202387	3707099134	769650143	1364682721	2073513766	7.91848e+08	4047883241	1742326705	6.82152e+07	984573720	1048719760	608261	4853360693	5.7294e+07	1.55409e+08	265979555	1.28648e+06	751542913	1.01956e+08	1.42875e+07	4.95796e+08	8.49783e+08	7.26207e+07	5.05127e+08	9.68092e+08	1199603370	4.89614e+08	9.88185e+08	1.87889e+08	3.14776e+08	133911286	1.21111e+08	4.62528e+08	1.28023e+07	3.55098e+08	2.84821e+08
2015	15036254477	17557477039	31758700180	14830776278	6.15694e+08	1431849584	2162543280	4.85411e+08	4596445930	4890842009	2812296427	1815783974	7596985854	2529792234	3597278525	7.28171e+08	1373056067	2090357307	7.76392e+08	3940660262	1788474355	6.92269e+07	9.95186e+08	1115118443	611290	4680174433	5.79106e+07	1.57047e+08	2.6835e+08	1.11937e+06	7.74493e+08	1.01978e+08	1.61216e+07	5.07727e+08	8.08423e+08	4.71128e+07	5.47536e+08	9.73586e+08	1209087136	4.96484e+08	9.17116e+08	1.9207e+08	3.10696e+08	1.25144e+08	121623088	4.67663e+08	1.56844e+07	358287636	2.78365e+08
2016	14955882864	17493974164	31179988325	15062872088	6.1534e+08	1409910955	2136536747	5.00136e+08	4743042896	4809695784	2991191306	1806873484	7657366870	2490412091	3496650447	7.24201e+08	1349313487	2063479310	7.95718e+08	4034070180	1782140330	6.65382e+07	1007544365	1176856577	654035	4797645491	5.81956e+07	1.56035e+08	2.72904e+08	974143	7.77304e+08	106431822	15903913	5.37376e+08	8.09271e+08	4.81194e+07	5.12419e+08	9.74466e+08	1204419567	4.91954e+08	9.1162e+08	1.81405e+08	3.11309e+08	1.24985e+08	1.22156e+08	4.28013e+08	1.29714e+07	3.54258e+08	2.67575e+08
Black Soldier Fly eco-potential EU (RIW weighted) - protein supply	China	United States	India	Russian Federation	Japan	Germany	Islamic Republic of Iran	Saudi Arabia	Indonesia	Canada	Mexico	South Africa	Brazil	Turkey	Australia	United Kingdom	Poland	France	Italy	Kazakhstan	Afghanistan	Albania	Algeria	Angola	Antigua and Barbuda	Argentina	Armenia	Austria	Azerbaijan	Barbados	Belarus	Belgium	Belize	Benin	Bolivia	Botswana	Bulgaria	Burkina Faso	Cameroon	Central African Republic	Chad	Chile	Colombia	Congo	Croatia	Cuba	Cyprus	Czechia	Denmark
2000	4244007842	4555382632	8439692078	4330281048	1.37742e+08	3.70992e+08	5.38551e+08	1.27255e+08	1155947821	1146744697	7.89787e+08	5.37069e+08	1698899306	6.71619e+08	687926277	176584080	4.16217e+08	463948651	2.20948e+08	1012063996	4.33886e+08	1.89841e+07	2.99816e+08	2.25651e+08	167540	7.83071e+08	2.04495e+07	3.91716e+07	8.06888e+07	552714	2.09887e+08	2.64974e+07	2.66485e+06	1.27864e+08	1.66203e+08	1.59418e+07	1.22019e+08	1.5929e+08	3.44311e+08	1.23674e+08	1.69003e+08	6.61163e+07	1.31999e+08	3.3713e+07	3.7483e+07	1.49314e+08	3.43159e+06	1.06633e+08	6.78135e+07
2001	4280850976	4617216554	8478354775	4235396169	1.36479e+08	3.58375e+08	5.69525e+08	1.29235e+08	1144029170	1157229199	7.83974e+08	5.34019e+08	1713563927	6.84564e+08	7.12892e+08	1.66585e+08	4.04822e+08	4.57386e+08	2.17816e+08	9.89145e+08	4.59219e+08	1.84851e+07	2.91047e+08	2.21278e+08	171881	8.13316e+08	20702063	3.85232e+07	7.90406e+07	523785	1.93345e+08	2.488e+07	2.57537e+06	1.34821e+08	1.68379e+08	8.72667e+06	1.22011e+08	1.93646e+08	3.2072e+08	1.21781e+08	1.78651e+08	6.52691e+07	1.13368e+08	3.27197e+07	3.50069e+07	1.54001e+08	3.41243e+06	103479930	6.32273e+07
2002	4253488709	4490130722	8765044166	4131940193	1.38989e+08	3.53589e+08	5.84321e+08	1.30673e+08	1118932441	1145637177	783036918	5.43245e+08	1701126181	6.88714e+08	672309519	1.68573e+08	3.83977e+08	4.58833e+08	2.17491e+08	9.49066e+08	4.27264e+08	1.75242e+07	2.80386e+08	2.1413e+08	171831	9.14809e+08	2.03742e+07	3.87723e+07	7.69554e+07	486634	1.93174e+08	2.45434e+07	2.6784e+06	1.27556e+08	1.73002e+08	1.09575e+07	1.21661e+08	1.9686e+08	3.23003e+08	1.19247e+08	1.76148e+08	6.04236e+07	1.03501e+08	3.24714e+07	3.34371e+07	1.60643e+08	3.50302e+06	1.03112e+08	6.29614e+07
2003	4230401195	4424486634	8733675290	4042380519	1.38312e+08	3.5847e+08	5.84986e+08	1.31234e+08	1244280006	1149790389	8.03689e+08	5.33367e+08	1659151824	6.75563e+08	6.29289e+08	1.62985e+08	3.69875e+08	4.68748e+08	2.11557e+08	9.22663e+08	4.23058e+08	1.79139e+07	2.71143e+08	2.26365e+08	169187	9.20107e+08	1.9256e+07	4.01317e+07	7.46671e+07	484761	1.93644e+08	2.49217e+07	2.6423e+06	1.38681e+08	1.82225e+08	9.45636e+06	125593423	1.99591e+08	3.24246e+08	1.21423e+08	1.77187e+08	5.32109e+07	1.0652e+08	3.08989e+07	3.39069e+07	1.44794e+08	4.14908e+06	1.02898e+08	6.50864e+07
2004	4182164577	4332283356	8778942999	3999432569	1.41648e+08	3.6517e+08	583669075	1.27276e+08	1354833024	1131473801	7.89258e+08	5.0674e+08	1692676716	6.8791e+08	7.52967e+08	1.67382e+08	3.77767e+08	4.77924e+08	2.11577e+08	9.43724e+08	4.20062e+08	1.80117e+07	2.66602e+08	2.28051e+08	170035	9.95697e+08	1.79964e+07	4.07492e+07	7.26302e+07	461823	1.88866e+08	2.51265e+07	2.67323e+06	1.33639e+08	1.91001e+08	1.07352e+07	1.22746e+08	1.8216e+08	3.34736e+08	1.20349e+08	1.79756e+08	5.2502e+07	1.07494e+08	2.97976e+07	3.34208e+07	145303995	4.1643e+06	9.93724e+07	6.38143e+07
2005	4141012476	4289045162	8821455710	3838056630	1.40102e+08	3.64488e+08	5.81625e+08	1.24114e+08	1270465643	1151821265	7.94411e+08	4.95554e+08	1727149813	6.84934e+08	7.47141e+08	1.64221e+08	3.65154e+08	4.90248e+08	2.07412e+08	9.42284e+08	4.33033e+08	1.62584e+07	2.65114e+08	2.19567e+08	142389	1016406532	1.74591e+07	3.99166e+07	6.68064e+07	430407	1.84659e+08	2.52137e+07	2.72047e+06	1.36366e+08	1.94916e+08	1.19489e+07	1.21049e+08	1.98922e+08	3.10036e+08	1.19222e+08	1.84105e+08	5.01313e+07	9.6639e+07	3.62682e+07	3.31726e+07	1.40086e+08	4.64999e+06	9.59118e+07	5.98743e+07
2006	4144513365	4249959272	8424927601	3788102334	1.43007e+08	3.55192e+08	5.97159e+08	1.22546e+08	1160746774	1126474015	7.88007e+08	4.69171e+08	1720778367	6.62262e+08	6.87652e+08	1.73827e+08	3.71944e+08	4.90584e+08	1.97492e+08	9.17942e+08	4.32827e+08	1.77587e+07	2.64864e+08	2.13537e+08	145227	1053073326	1.66223e+07	4.02981e+07	6.30505e+07	443412	1.80759e+08	2.49674e+07	2.83864e+06	127657909	1.91181e+08	1.04251e+07	116593357	1.85403e+08	2.88652e+08	1.15918e+08	1.8481e+08	4.56844e+07	8.85853e+07	3.26976e+07	3.2495e+07	134287578	4.47521e+06	9.97915e+07	6.17002e+07
2007	4047218131	4181928246	8089975207	3663524060	141677685	344039263	593305239	1.20303e+08	1164240130	1105846333	7.87631e+08	4.61587e+08	1724710408	6.35546e+08	6.33747e+08	1.72956e+08	3.52448e+08	4.90853e+08	1.92264e+08	9.07862e+08	4.13195e+08	1.76395e+07	2.66483e+08	2.1073e+08	141896	1094432254	1.63245e+07	3.94047e+07	6.27185e+07	426318	178077114	2.46178e+07	2.86013e+06	1.23577e+08	195684517	9.42151e+06	1.20305e+08	1.90483e+08	2.8837e+08	1.13484e+08	1.90152e+08	4.37692e+07	9.26103e+07	3.29793e+07	3.10207e+07	130394179	4.02936e+06	9.97828e+07	6.19107e+07
2008	3935316346	4218914011	8038689020	3627491476	1.43494e+08	3.49762e+08	5.64736e+08	1.19996e+08	1190672084	1091258286	7.72416e+08	4.68105e+08	1681109254	6.36554e+08	6.69178e+08	1.73287e+08	364979654	4.81758e+08	2.01285e+08	8.94275e+08	4.06231e+08	1.77634e+07	2.66428e+08	1.96687e+08	139234	1053681848	1.52643e+07	3.99322e+07	6.20027e+07	444689	1.80233e+08	2.54694e+07	2.99923e+06	1.18242e+08	199762672	1.38326e+07	1.14582e+08	2.27437e+08	2.90452e+08	1.11779e+08	1.88481e+08	4.55459e+07	8.38285e+07	3.29345e+07	3.09278e+07	1.15828e+08	2.98986e+06	100912397	6.52671e+07
2009	3909601813	4258358399	8128410518	3625306679	1.46429e+08	3.45773e+08	5.43485e+08	1.14414e+08	1209250449	1096278713	7.58693e+08	4.67593e+08	1702758390	6.2934e+08	7.79815e+08	1.75907e+08	355868166	4.87447e+08	1.85031e+08	8.94808e+08	4.00345e+08	1.77412e+07	2.57082e+08	2.30632e+08	142321	1034934558	1.57742e+07	3.96364e+07	6.2253e+07	448722	1.79763e+08	2.59474e+07	3.10092e+06	1.17307e+08	2.10057e+08	1.46151e+07	1.16052e+08	2.12244e+08	2.83793e+08	1.1101e+08	1.93882e+08	4.73708e+07	8.56295e+07	3.14826e+07	3.06263e+07	1.17592e+08	3.25662e+06	1.01975e+08	6.94895e+07
2010	3793684554	4232402514	7822289904	3577189494	1.45053e+08	345161948	5.25535e+08	1.06041e+08	1175175629	1074377092	7.33413e+08	4.51939e+08	1665522186	6.13442e+08	7.27978e+08	1.73661e+08	3.17492e+08	4.80129e+08	1.87249e+08	8.60257e+08	3.97935e+08	1.74178e+07	2.59158e+08	2.27346e+08	145655	1135419003	1.59482e+07	3.97923e+07	6.28699e+07	412001	1.75055e+08	2.55467e+07	3.07585e+06	1.22193e+08	1.96533e+08	1.21109e+07	118410567	2.2073e+08	2.92773e+08	9.89421e+07	2.00854e+08	4.54293e+07	8.51475e+07	3.19294e+07	3.32837e+07	1.27753e+08	3.01888e+06	1.01445e+08	6.51218e+07
2011	3744853791	4273701287	7763471448	3566591461	1.44484e+08	3.41648e+08	5.20903e+08	1.05046e+08	1139798886	1065372163	7.36956e+08	4.27983e+08	1634480415	5.8373e+08	8.88706e+08	1.74846e+08	322039676	4.85184e+08	1.81566e+08	8.98203e+08	3.92633e+08	1.70053e+07	2.4722e+08	2.4899e+08	140038	1144240817	1.55069e+07	3.90859e+07	6.107e+07	379776	1.67427e+08	2.53626e+07	3.13122e+06	1.19191e+08	1.95458e+08	1.5098e+07	1.19119e+08	2.12831e+08	2.84141e+08	9.95133e+07	2.05405e+08	4.58427e+07	7.52884e+07	2.9323e+07	3.25803e+07	1.17619e+08	3.10174e+06	1.03428e+08	6.97411e+07
2012	3657566426	4195734660	7853256088	3490413176	142323328	3.45083e+08	5.14462e+08	1.01578e+08	1126365673	1065309771	6.89351e+08	4.21457e+08	1670313841	5.68114e+08	8.98723e+08	1.78358e+08	3.19424e+08	4.87865e+08	1.93694e+08	9.17916e+08	3.92583e+08	1.65124e+07	2.47121e+08	2.51006e+08	150225	1157420471	1.51705e+07	3.88925e+07	6.14966e+07	341047	1.64679e+08	2.40925e+07	3.23147e+06	1.1971e+08	2.01691e+08	1.28257e+07	1.20799e+08	2.21168e+08	2.84141e+08	1.0121e+08	2.1993e+08	4.46802e+07	7.30286e+07	3.16339e+07	3.22152e+07	1.07532e+08	3.14048e+06	1.07904e+08	6.91512e+07
2013	3627315018	4213584417	7708662884	3511795520	1.43415e+08	3.47058e+08	4.99575e+08	9.94032e+07	1122018170	1068800727	667584697	4.17506e+08	1664960212	564931048	872117953	1.80223e+08	3.15753e+08	4.91732e+08	1.86785e+08	9.05169e+08	3.96776e+08	1.64428e+07	2.42005e+08	254054845	141862	1148274364	1.47781e+07	3.78446e+07	6.13618e+07	319625	1.7593e+08	2.43252e+07	3.16047e+06	1.24411e+08	2.02658e+08	1.28163e+07	1.2365e+08	2.3188e+08	2.80333e+08	1.1602e+08	2.36672e+08	4.44846e+07	7.75636e+07	3.16076e+07	3.08461e+07	1.03134e+08	3.04991e+06	8.48862e+07	6.56476e+07
2014	3623350056	4173536805	7567762852	3489401462	145174029	3.40914e+08	5.0766e+08	1.13485e+08	1081492634	1099200454	6.17437e+08	4.26605e+08	1744294567	6.01345e+08	8.74831e+08	1.81628e+08	3.22049e+08	4.89324e+08	1.86867e+08	9.55252e+08	4.11168e+08	1.6098e+07	232347515	2.47485e+08	143542	1145334548	1.35207e+07	3.66747e+07	6.2768e+07	303594	177355057	2.40603e+07	3.37169e+06	1.17002e+08	2.00538e+08	1.71376e+07	1.19204e+08	2.28458e+08	2.83092e+08	1.15543e+08	2.332e+08	4.43396e+07	7.42834e+07	3.16014e+07	2.85806e+07	1.09151e+08	3.02119e+06	8.37988e+07	6.72142e+07
2015	3548374582	4143352678	7494669943	3499884207	1.45296e+08	3.37899e+08	5.10334e+08	1.14551e+08	1084705764	1154179686	6.63668e+08	4.28503e+08	1792796973	5.97e+08	8.48914e+08	1.71839e+08	3.24025e+08	4.93299e+08	1.83219e+08	9.29948e+08	4.22058e+08	1.63367e+07	2.34852e+08	2.63154e+08	144257	1104464681	1.36662e+07	3.70613e+07	6.33275e+07	264159	1.82771e+08	2.40656e+07	3.80451e+06	119817538	1.90778e+08	1.11181e+07	1.29212e+08	2.29755e+08	2.8533e+08	1.17164e+08	2.16428e+08	4.53262e+07	7.33205e+07	2.95324e+07	2.87016e+07	1.10363e+08	3.70133e+06	8.45516e+07	6.56907e+07
2016	3529407851	4128366766	7358100929	3554656017	1.45213e+08	332721969	5.04197e+08	1.18026e+08	1119300879	1135030156	7.05885e+08	4.264e+08	1807046164	5.87707e+08	825167304	1.70903e+08	3.18422e+08	4.86956e+08	1.8778e+08	9.51992e+08	4.20564e+08	1.57022e+07	2.37768e+08	2.77724e+08	154344	1132186433	1.37334e+07	3.68223e+07	6.44021e+07	229886	1.83434e+08	2.51166e+07	3.75313e+06	1.26814e+08	1.90978e+08	1.13556e+07	1.20925e+08	2.29962e+08	2.84228e+08	1.16095e+08	2.15131e+08	4.28094e+07	7.34652e+07	2.94951e+07	2.88273e+07	1.01006e+08	3.0611e+06	8.36006e+07	6.31444e+07
Chlorella eco-potential EU (RIW weighted) - protein supply	China	United States	India	Russian Federation	Japan	Germany	Islamic Republic of Iran	Saudi Arabia	Indonesia	Canada	Mexico	South Africa	Brazil	Turkey	Australia	United Kingdom	Poland	France	Italy	Kazakhstan	Afghanistan	Albania	Algeria	Angola	Antigua and Barbuda	Argentina	Armenia	Austria	Azerbaijan	Barbados	Belarus	Belgium	Belize	Benin	Bolivia	Botswana	Bulgaria	Burkina Faso	Cameroon	Central African Republic	Chad	Chile	Colombia	Congo	Croatia	Cuba	Cyprus	Czechia	Denmark
2000	94815180240	101771589812	188550765048	96742605877	3077288795	8288304578	12031732994	2842999294	25824976086	25619369521	17644590645	11998638552	37955029739	15004610615	15368928704	3945056652	9298678259	10365055061	4936179913	22610474295	9693425988	4.24123e+08	6698175249	5041253898	3.74301e+06	17494544559	4.56861e+08	8.75132e+08	1802663732	1.23482e+07	4689083039	5.91977e+08	5.95353e+07	2856607151	3713127659	3.56154e+08	2726026558	3558679805	7692226870	2762990879	3775679153	1477101934	2948989298	7.53182e+08	8.37406e+08	3335820932	7.6665e+07	2382274149	1515019302
2001	95638290971	103153018573	189414526552	94622787252	3049065642	8006439661	12723732782	2887230346	25558702057	25853603283	17514719681	11930502617	38282651366	15293813578	15926687342	3721663934	9044104630	10218440923	4866209079	22098437512	10259379991	4.12975e+08	6502272714	4943560034	3.83998e+06	18170259584	462503819	8.60645e+08	1765842153	11701852	4319518941	5.55842e+08	5.75363e+07	3012028507	3761742995	1.94962e+08	2725848491	4326242021	7165190118	2720709191	3991232507	1458174246	2532753693	7.30989e+08	7.82087e+08	3440528262	7.62369e+07	2311840266	1412557281
2002	95026991846	100313799960	195819440799	92311482142	3105149096	7899505163	13054285495	2919353828	24998017197	25594626456	17493791076	12136603854	38004780253	15386525904	15020035446	3766072600	8578412601	10250777263	4858949495	21203032777	9545487792	3.91508e+08	6264085283	4783873920	3.83887e+06	20437709776	4.55179e+08	8.66211e+08	1719257029	1.08719e+07	4315691825	5.48324e+08	5.9838e+07	2849731216	3865020669	2.44801e+08	2718017049	4398034092	7216201877	2664086731	3935320066	1349920566	2312314739	7.25442e+08	7.47017e+08	3588923164	7.82609e+07	2303613721	1406617565
2003	94511194777	98847248473	195118630220	90310633672	3090017472	8008563049	13069145925	2931900167	27798401273	25687413173	17955188841	11915917052	37067033120	15092722635	14058906394	3641243535	8263353305	10472277397	4726380222	20613161911	9451529644	4.00214e+08	6057584408	5057211657	3.7798e+06	20556073546	4.30198e+08	896581485	1668133099	1.083e+07	4326189211	5.56774e+08	5.90315e+07	3098257666	4071090049	211264112	2805876776	4459044230	7243971758	2712694764	3958523151	1188781762	2379750933	6.9031e+08	7.57512e+08	3234830578	9.26943e+07	2298838703	1454091874
2004	93433542748	96787339362	196129953965	89351135532	3164545427	8158253939	13039723443	2843475501	30268261083	25278203146	17632776208	11321061238	37816011151	15368571776	16821997223	3739478337	8439677948	10677280910	4726830376	21083688521	9384590425	402398280	5956153472	5094881762	3.79875e+06	22244830415	4.02057e+08	910375020	1622626887	1.03176e+07	4219437987	5.61349e+08	5.97225e+07	2985632026	4267141859	2.39835e+08	2742273303	4069628475	7478311366	2688707571	4015920476	1172944420	2401517640	6.65706e+08	7.46653e+08	3246229740	9.30344e+07	2220074192	1425671792
2005	92514165597	95821356883	197079728458	85745843241	3130011727	8143005983	12994067587	2772830147	28383413362	25732784874	17747906714	11071155829	38586172991	15302070814	16691846498	3668844360	8157888209	10952596661	4633773667	21051515543	9674363446	3.63227e+08	5922902336	4905336631	3.18111e+06	22707490686	3.90053e+08	8.91776e+08	1492519377	9.61569e+06	4125468353	5.63297e+08	6.07779e+07	3046546586	4354616623	2.66951e+08	2704352431	4444111526	6926488916	2663532406	4113082823	1119981843	2159008238	810266457	7.41107e+08	3129650843	1.03885e+08	2142760955	1337649905
2006	92592378789	94948140843	188220912558	84629816658	3194922802	7935324344	13341107407	2737796543	25932189272	25166503169	17604823983	10481736156	38443828824	14795574043	15362798098	3883466909	8309574242	10960121599	4412168943	20507699570	9669764327	3.96747e+08	5917304974	4770621632	3.24452e+06	23526661805	3.71357e+08	9.00299e+08	1408607181	9.90624e+06	4038318255	5.57796e+08	6.34179e+07	2851999360	4271164401	2.32906e+08	2604806723	4142076222	6448761081	2589710043	4128839246	1020634117	1979080128	7.30496e+08	7.2597e+08	3000112484	9.99804e+07	2229436941	1378441069
2007	90418710522	93428262882	180737756837	81846619277	3165214519	7686165045	13255004529	2687673221	26010234164	24705661082	17596429534	10312300391	38531674364	14198707398	14158506378	3863995222	7874017936	10966114622	4295353043	20282500671	9231171445	3.94084e+08	5953486593	4707906685	3.17008e+06	24450659682	3.64705e+08	8.80339e+08	1401191705	9.52435e+06	3978412455	5.49986e+08	6.3898e+07	2760826553	4371778620	210485609	2687718503	4255569934	6442458334	2535341007	4248181619	977845030	2069001437	7.3679e+08	693032067	2913130240	9.00198e+07	2229243428	1383143244
2008	87918718004	94254560133	179591974539	81041616999	3205798568	7814010573	12616730050	2680823608	26600749198	24379750216	17256517728	10457921201	37557583037	14221217780	14950070520	3871386209	8153993340	10762938092	4496908185	19978950408	9075589904	3.96851e+08	5952260531	4394168554	3.11062e+06	23540256774	3.41019e+08	8.92124e+08	1385200470	9.93478e+06	4026576620	5.6901e+08	6.70057e+07	2641632034	4462888491	3.09034e+08	2559867365	5081161679	6488966647	2497256485	4210838007	1017537879	1872809099	7.35789e+08	6.90957e+08	2587698703	66796265	2254479130	1458130014
2009	87344230817	95135785346	181596438305	80992806549	3271356088	7724894989	12141973748	2556110049	27015807594	24491911333	16949917763	10446484070	38041245357	14060052617	17421817454	3929930076	7950434014	10890030526	4133760236	19990874277	8944095429	3.96356e+08	5743458289	5152542017	3.17958e+06	23121424443	3.52411e+08	8.85514e+08	1390792279	1.00249e+07	4016075605	5.79689e+08	6.92775e+07	2620756169	4692874290	3.26516e+08	2592717464	4741737785	6340213484	2480074581	4331500220	1058309223	1913045538	7.03352e+08	6.84222e+08	2627123341	7.27561e+07	2278213316	1552462373
2010	84754528765	94555906140	174757412025	79917822786	3240624690	7711246898	11740955080	2369055249	26254543643	24002608240	16385149101	10096744506	37209353077	13704872556	16263729038	3879745246	7093080246	10726528858	4183326251	19218956506	8890252405	3.8913e+08	5789834543	5079137060	3.25407e+06	25366342712	3.56297e+08	8.88998e+08	1404574571	9.2045e+06	3910886839	5.70738e+08	6.87175e+07	2729918387	4390744713	2.7057e+08	2645404925	4931308336	6540827138	2210460559	4487268169	1014934619	1902276057	7.13334e+08	7.43589e+08	2854113843	6.74447e+07	2266379892	1454883402
2011	83663602981	95478560097	173443351652	79681052622	3227905470	7632739638	11637472513	2346820573	25464193470	23801429558	16464304703	9561542190	36515850316	13041084709	19854543026	3906235313	7194673305	10839470839	4056346675	20066721717	8771798042	3.79914e+08	5523125548	5562681236	3.12859e+06	25563430455	3.46438e+08	8.73215e+08	1364362620	8.48456e+06	3740483384	5.66626e+08	6.99544e+07	2662843148	4366711327	3.37304e+08	2661232292	4754857925	6347974717	2223221132	4588933509	1024170124	1682014551	6.55103e+08	7.27874e+08	2627725561	6.92959e+07	2310677949	1558083443
2012	81713520051	93736711335	175449226084	77979157132	3179638798	7709488590	11493568201	2269357242	25164082698	23800035653	15400768087	9415747846	37316403220	12692198460	20078320400	3984697440	7136228196	10899360087	4327306685	20507117569	8770672153	3.68902e+08	5520923132	5607711035	3.35616e+06	25857876482	3.38924e+08	8.68895e+08	1373892552	7.61931e+06	3679082956	5.3825e+08	7.21942e+07	2674439400	4505976363	2.86538e+08	2698769187	4941104826	6347974717	2261116947	4913435584	9.98198e+08	1631528936	706731634	7.19717e+08	2402376451	7.01613e+07	2410677972	1544904179
2013	81037674762	94135491931	172218876108	78456859086	3204035103	7753604975	11160992076	2220762479	25066955328	23878026941	14914478418	9327471762	37196798039	12621098059	19483946302	4026349471	7054215434	10985754941	4172963460	20222339249	8864354782	3.67347e+08	5406629939	5675827382	3.16933e+06	25653543741	3.30157e+08	8.45484e+08	1370881748	7.14073e+06	3930432767	5.43449e+08	7.06078e+07	2779457741	4527577543	2.86329e+08	2762462491	5180420788	6262896773	2591988164	5287475855	9.93829e+08	1732843979	7.06143e+08	6.89131e+08	2304112843	6.81379e+07	1896439567	1466630340
2014	80949093745	93240790094	169071035086	77956554478	3243326176	7616335591	11341615885	2535367359	24161576225	24557185803	13794125311	9530752789	38969203142	13434620650	19544550634	4057745867	7194873827	10931969532	4174777635	21341231000	9185886664	3.59644e+08	5190864939	5529055391	3.20687e+06	25587865437	3.02065e+08	8.19347e+08	1402296160	6.78258e+06	3962281014	5.3753e+08	7.53267e+07	2613931721	4480219589	3.8287e+08	2663128018	5103970536	6324543250	2581339996	5209904910	9.90589e+08	1659562380	7.06006e+08	6.38518e+08	2438540280	6.74962e+07	1872143975	1501629754
2015	79274070190	92566447932	167438069835	78190748992	3246057244	7548990646	11401350520	2559182741	24233360630	25785474255	14826976006	9573167734	40052793119	13337558725	18965554932	3839057966	7239019743	11020771970	4093292512	20775930513	9429186088	3.64977e+08	5246814050	5879122212	3.22284e+06	24674793652	3.05316e+08	8.27984e+08	1414796107	5.90155e+06	4083276771	5.37648e+08	8.49963e+07	2676838000	4262165962	2.48388e+08	2886715068	5132936705	6374543515	2617561386	4835212463	1012629832	1638049311	659782120	6.41221e+08	2465609460	8.26912e+07	1888962391	1467593457
2016	78850335347	92231648375	164386987910	79414403430	3244194416	7433325911	11264238996	2636814998	25006248465	25357655507	15770144748	9526189891	40371133626	13129938923	18435024053	3818129133	7113844223	10879065922	4195182021	21268405842	9395791874	3.50802e+08	5311970668	6204617714	3.4482e+06	25294124011	3.06818e+08	8.22646e+08	1438804863	5.13587e+06	4098100563	5.61129e+08	8.38485e+07	2833151364	4266636020	253694634	2701573291	5137575300	6349935178	2593677489	4806238922	956403340	1641283525	6.58948e+08	644028540	2256566919	6.83878e+07	1867717702	1410705157
House Fly eco-potential EU (RIW weighted) - protein supply	China	United States	India	Russian Federation	Japan	Germany	Islamic Republic of Iran	Saudi Arabia	Indonesia	Canada	Mexico	South Africa	Brazil	Turkey	Australia	United Kingdom	Poland	France	Italy	Kazakhstan	Afghanistan	Albania	Algeria	Angola	Antigua and Barbuda	Argentina	Armenia	Austria	Azerbaijan	Barbados	Belarus	Belgium	Belize	Benin	Bolivia	Botswana	Bulgaria	Burkina Faso	Cameroon	Central African Republic	Chad	Chile	Colombia	Congo	Croatia	Cuba	Cyprus	Czechia	Denmark
2000	1667758603	1790118882	3316527582	1701661198	5.41282e+07	1.45788e+08	2.11633e+08	5.00071e+07	4.5425e+08	4.50634e+08	310360828	2.11051e+08	6.67613e+08	2.63925e+08	2.70333e+08	6.93919e+07	1.6356e+08	1.82317e+08	8.68253e+07	3.97709e+08	170503231	7.46014e+06	1.17818e+08	8.86735e+07	65837.9	3.07722e+08	8.03599e+06	1.53932e+07	3.17081e+07	217199	8.2479e+07	1.04126e+07	1.0472e+06	5.02465e+07	6.53123e+07	6.2646e+06	4.79496e+07	6.25957e+07	1.35303e+08	4.85998e+07	6.64126e+07	2.59816e+07	5.18715e+07	1.32481e+07	1.47296e+07	5.86757e+07	1.3485e+06	4.19032e+07	2.66485e+07
2001	1682236770	1814417625	3331720779	1664374492	5.36318e+07	1.4083e+08	2.23805e+08	5.07852e+07	4.49567e+08	4.54754e+08	3.08076e+08	2.09852e+08	6.73376e+08	2.69012e+08	2.80144e+08	6.54625e+07	1.59082e+08	179738020	8.55945e+07	3.88702e+08	1.80458e+08	7.26406e+06	1.14372e+08	8.69551e+07	67543.7	3.19607e+08	8.13525e+06	1.51384e+07	3.10604e+07	205831	7.59785e+07	9.77702e+06	1.01204e+06	5.29803e+07	6.61675e+07	3.4293e+06	4.79465e+07	7.60968e+07	1.26033e+08	4.78561e+07	7.02041e+07	2.56487e+07	4.45501e+07	1.28578e+07	1.37566e+07	6.05174e+07	1.34097e+06	4.06643e+07	2.48463e+07
2002	1671484279	1764476980	3444380490	1623719621	5.46182e+07	1.38949e+08	2.29619e+08	5.13502e+07	4.39704e+08	450198569	3.07708e+08	2.13478e+08	6.68488e+08	2.70642e+08	2.64196e+08	6.62436e+07	1.50891e+08	1.80307e+08	8.54669e+07	3.72952e+08	1.67901e+08	6.88646e+06	1.10183e+08	8.41463e+07	67524.1	3.59491e+08	8.00641e+06	1.52363e+07	3.0241e+07	191231	7.59112e+07	9.64478e+06	1.05252e+06	5.01256e+07	67984066	4.30595e+06	4.78088e+07	7.73595e+07	1.2693e+08	4.68601e+07	6.92206e+07	2.37445e+07	4.06726e+07	1.27602e+07	1.31397e+07	6.31276e+07	1.37658e+06	4.05196e+07	2.47418e+07
2003	1662411628	1738680964	3432053531	1588525549	5.43521e+07	1.40867e+08	2.29881e+08	5.15709e+07	4.88962e+08	4.51831e+08	3.15824e+08	2.09596e+08	6.51993e+08	2.65475e+08	2.4729e+08	6.40479e+07	1.45349e+08	1.84203e+08	8.3135e+07	3.62577e+08	1.66248e+08	7.03959e+06	1.0655e+08	8.89542e+07	66485.1	3.61573e+08	7.567e+06	1.57705e+07	2.93418e+07	190495	7.60958e+07	9.79341e+06	1.03834e+06	5.4497e+07	7.16087e+07	3.71605e+06	4.93542e+07	7.84327e+07	1.27418e+08	4.77151e+07	6.96287e+07	2.09102e+07	4.18588e+07	1.21423e+07	1.33243e+07	5.68993e+07	1.63045e+06	4.04356e+07	2.55769e+07
2004	1643456188	1702448041	3449842284	1571648386	5.5663e+07	1.435e+08	2.29363e+08	5.00155e+07	5.32406e+08	4.44633e+08	3.10153e+08	1.99133e+08	665167516	2.70327e+08	2.95892e+08	6.57758e+07	1.4845e+08	1.87809e+08	8.31429e+07	3.70853e+08	1.65071e+08	7.07801e+06	1.04766e+08	8.96168e+07	66818.3	3.91277e+08	7.07201e+06	1.60131e+07	2.85413e+07	181482	7.42181e+07	9.8739e+06	1.05049e+06	5.2516e+07	7.50572e+07	4.2186e+06	4.82354e+07	7.1583e+07	1.3154e+08	4.72932e+07	7.06383e+07	2.06316e+07	4.22417e+07	1.17095e+07	1.31333e+07	5.70998e+07	1.63643e+06	3.90502e+07	2.5077e+07
2005	1627284736	1685456821	3466548413	1508232831	5.50556e+07	1.43232e+08	2.2856e+08	4.87729e+07	4.99252e+08	4.52629e+08	3.12178e+08	1.94737e+08	6.78714e+08	2.69157e+08	2.93602e+08	6.45334e+07	1.43494e+08	1.92652e+08	8.15061e+07	3.70287e+08	1.70168e+08	6.38901e+06	1.04181e+08	8.62828e+07	55954.3	3.99415e+08	6.86086e+06	1.5686e+07	2.62528e+07	169136	7.25652e+07	9.90816e+06	1.06906e+06	5.35875e+07	7.65959e+07	4.69555e+06	4.75684e+07	7.817e+07	1.21834e+08	4.68504e+07	7.23474e+07	1.97e+07	3.7976e+07	1.42522e+07	1.30358e+07	5.50492e+07	1.8273e+06	3.76903e+07	2.35287e+07
2006	1628660473	1670097323	3310725618	1488602399	5.61973e+07	1.39579e+08	2.34664e+08	4.81567e+07	456136155	4.42668e+08	3.09661e+08	1.84369e+08	6.76211e+08	2.60248e+08	2.70225e+08	6.83085e+07	1.46162e+08	1.92784e+08	7.76082e+07	3.60722e+08	1.70087e+08	6.97862e+06	1.04083e+08	8.39132e+07	57069.7	4.13824e+08	6.53202e+06	1.58359e+07	2.47768e+07	174247	7.10323e+07	9.8114e+06	1.11549e+06	50165453	7.5128e+07	4.09672e+06	4.58174e+07	7.28574e+07	1.13431e+08	4.55519e+07	7.26245e+07	1.79525e+07	3.48112e+07	1.28491e+07	1.27695e+07	5.27707e+07	1.75861e+06	3.92148e+07	2.42462e+07
2007	1590426575	1643363318	3179100098	1439647144	5.56748e+07	1.35196e+08	2.3315e+08	4.7275e+07	4.57509e+08	434562047	3.09514e+08	181388968	6.77756e+08	2.49749e+08	2.49042e+08	6.7966e+07	138500619	1.92889e+08	7.55534e+07	3.56761e+08	1.62372e+08	6.93177e+06	1.04719e+08	8.28101e+07	55760.4	430076681	6.415e+06	1.54848e+07	2.46464e+07	167529	6.99786e+07	9.67402e+06	1.12394e+06	4.85618e+07	7.68977e+07	3.70235e+06	4.72758e+07	7.48537e+07	1.1332e+08	4.45956e+07	7.47237e+07	1.71999e+07	3.63929e+07	1.29598e+07	1.21901e+07	5.12407e+07	1.58341e+06	3.92114e+07	2.43289e+07
2008	1546452772	1657897534	3158946276	1425487497	5.63886e+07	137445115	2.21923e+08	4.71545e+07	4.67896e+08	4.28829e+08	3.03535e+08	183950376	6.60622e+08	2.50145e+08	2.62965e+08	6.8096e+07	143425267	189315493	7.90987e+07	3.51421e+08	1.59636e+08	6.98043e+06	1.04698e+08	7.72916e+07	54714.4	414063082	5.99838e+06	1.56921e+07	2.43651e+07	174748	7.08258e+07	1.00086e+07	1.1786e+06	4.64652e+07	7.85003e+07	5.43578e+06	4.5027e+07	8.93755e+07	1.14138e+08	4.39257e+07	7.40668e+07	1.78981e+07	3.29419e+07	1.29422e+07	1.21536e+07	4.55165e+07	1.17492e+06	3.96553e+07	2.56479e+07
2009	1536347787	1673397910	3194203939	1424628942	5.75418e+07	1.35878e+08	2.13572e+08	4.49609e+07	4.75197e+08	430802280	2.98142e+08	1.83749e+08	6.69129e+08	2.4731e+08	3.06442e+08	6.91258e+07	1.39845e+08	1.91551e+08	7.27111e+07	3.51631e+08	1.57323e+08	6.97173e+06	101024983	9.0631e+07	55927.5	4.06696e+08	6.19876e+06	1.55758e+07	2.44634e+07	176333	7.06411e+07	1.01965e+07	1.21856e+06	4.6098e+07	8.25457e+07	5.74327e+06	4.56048e+07	8.34051e+07	1.11522e+08	4.36235e+07	7.61892e+07	1.86152e+07	3.36497e+07	1.23717e+07	1.20352e+07	4.621e+07	1.27975e+06	4.00728e+07	2.73072e+07
2010	1490796032	1663198082	3073908382	1405720436	5.70012e+07	1.35638e+08	206518395	4.16707e+07	461806231	4.22196e+08	2.88208e+08	1.77597e+08	6.54497e+08	2.41063e+08	2.86072e+08	6.82431e+07	1.24764e+08	1.88675e+08	7.35829e+07	3.38053e+08	1.56376e+08	6.84463e+06	1.01841e+08	8.93399e+07	57237.7	4.46183e+08	6.26712e+06	1.56371e+07	2.47059e+07	161903	6.87908e+07	1.0039e+07	1.20871e+06	4.80181e+07	7.72313e+07	4.7592e+06	4.65315e+07	8.67396e+07	1.1505e+08	3.88811e+07	7.89291e+07	1.78523e+07	3.34602e+07	1.25472e+07	1.30794e+07	5.02026e+07	1.18632e+06	3.98647e+07	2.55908e+07
2011	1471607113	1679427172	3050794621	1401555749	5.67775e+07	1.34257e+08	2.04698e+08	4.12796e+07	4.47904e+08	4.18657e+08	2.896e+08	1.68183e+08	6.42298e+08	2.29387e+08	3.49233e+08	6.8709e+07	1.26551e+08	1.90662e+08	7.13494e+07	352965081	1.54292e+08	6.68252e+06	97149424	9.78452e+07	55030.6	4.4965e+08	6.0937e+06	1.53595e+07	2.39986e+07	149240	6.57935e+07	9.9667e+06	1.23047e+06	4.68383e+07	7.68086e+07	5.93304e+06	4.68099e+07	83635924	1.11658e+08	3.91055e+07	8.07174e+07	1.80147e+07	2.95859e+07	1.1523e+07	1.2803e+07	4.62206e+07	1.21889e+06	4.06438e+07	2.7406e+07
2012	1437305985	1648788795	3086077097	1371620133	5.59285e+07	1.35607e+08	2.02167e+08	3.9917e+07	4.42625e+08	4.18632e+08	2.70893e+08	1.65619e+08	6.5638e+08	2.2325e+08	3.53169e+08	7.00891e+07	125523212	1.91715e+08	7.61155e+07	3.60711e+08	1.54272e+08	6.48883e+06	9.71107e+07	9.86372e+07	59033.4	4.54829e+08	5.96154e+06	1.52835e+07	2.41662e+07	134020	6.47135e+07	9.46759e+06	1.26987e+06	4.70422e+07	7.92582e+07	5.04009e+06	4.74702e+07	8.69119e+07	1.11658e+08	3.97721e+07	8.64252e+07	1.75579e+07	2.86979e+07	1.24311e+07	1.26595e+07	4.22568e+07	1.23411e+06	4.24028e+07	2.71742e+07
2013	1425418155	1655803175	3029256618	1380022707	5.63576e+07	1.36383e+08	1.96317e+08	3.90623e+07	4.40917e+08	4.20004e+08	2.62339e+08	1.64066e+08	6.54276e+08	2.22e+08	3.42714e+08	7.08218e+07	1.24081e+08	1.93235e+08	7.34006e+07	3.55702e+08	1.5592e+08	6.46148e+06	9.51003e+07	9.98354e+07	55747.1	4.51235e+08	5.80732e+06	1.48717e+07	2.41132e+07	125602	6.91346e+07	9.55904e+06	1.24196e+06	4.88895e+07	7.96382e+07	5.03641e+06	4.85905e+07	9.11214e+07	1.10162e+08	4.5592e+07	9.30044e+07	1.7481e+07	3.048e+07	1.24208e+07	1.21215e+07	4.05284e+07	1.19852e+06	3.33576e+07	2.57974e+07
2014	1423860052	1640065751	2973887436	1371222562	5.70487e+07	1.33968e+08	1.99494e+08	4.4596e+07	4.24992e+08	4.3195e+08	2.42633e+08	1.67642e+08	6.85452e+08	2.36309e+08	3.4378e+08	7.1374e+07	1.26555e+08	192288684	7.34326e+07	375383156	1.61576e+08	6.32598e+06	9.13051e+07	9.72537e+07	56407.5	4.5008e+08	5.3132e+06	1.4412e+07	2.46658e+07	119303	69694834	9.45493e+06	1.32496e+06	4.59779e+07	7.88052e+07	6.73453e+06	4.68433e+07	8.97767e+07	1.11246e+08	4.54047e+07	9.164e+07	1.7424e+07	2.9191e+07	1.24184e+07	1.12313e+07	4.28929e+07	1.18723e+06	3.29302e+07	2.6413e+07
2015	1394397102	1628204360	2945164273	1375341944	5.70968e+07	1.32784e+08	2.00545e+08	4.50149e+07	4.26254e+08	4.53556e+08	2.608e+08	1.68388e+08	7.04512e+08	2.34602e+08	3.33596e+08	6.75274e+07	1.27331e+08	1.93851e+08	7.19993e+07	3.6544e+08	1.65855e+08	6.4198e+06	9.22892e+07	1.03411e+08	56688.4	434019102	5.37038e+06	1.45639e+07	2.48857e+07	103806	7.18231e+07	9.457e+06	1.49505e+06	4.70844e+07	7.49697e+07	4.36904e+06	5.07761e+07	9.02862e+07	1.12126e+08	4.60418e+07	8.50493e+07	1.78117e+07	2.88126e+07	1.16053e+07	1.12788e+07	4.3369e+07	1.4545e+06	3.3226e+07	2.58143e+07
2016	1386943787	1622315379	2891497043	1396865504	5.7064e+07	1.30749e+08	1.98133e+08	4.63805e+07	4.39849e+08	446030351	2.7739e+08	1.67562e+08	7.10111e+08	2.3095e+08	3.24264e+08	6.71593e+07	1.25129e+08	1.91358e+08	7.37915e+07	3.74102e+08	1.65268e+08	6.17046e+06	9.34353e+07	1.09137e+08	60652.3	444912859	5.3968e+06	1.447e+07	2.5308e+07	90337.8	7.20838e+07	9.87003e+06	1.47486e+06	4.98339e+07	7.50483e+07	4.46238e+06	4.75195e+07	9.03678e+07	111692653	4.56217e+07	8.45397e+07	1.68227e+07	2.88695e+07	1.15906e+07	1.13282e+07	3.96921e+07	1.20291e+06	3.28524e+07	2.48137e+07
Spirulina eco-potential EU (RIW weighted) - protein supply	China	United States	India	Russian Federation	Japan	Germany	Islamic Republic of Iran	Saudi Arabia	Indonesia	Canada	Mexico	South Africa	Brazil	Turkey	Australia	United Kingdom	Poland	France	Italy	Kazakhstan	Afghanistan	Albania	Algeria	Angola	Antigua and Barbuda	Argentina	Armenia	Austria	Azerbaijan	Barbados	Belarus	Belgium	Belize	Benin	Bolivia	Botswana	Bulgaria	Burkina Faso	Cameroon	Central African Republic	Chad	Chile	Colombia	Congo	Croatia	Cuba	Cyprus	Czechia	Denmark
2000	75749620407	81307226089	150636731837	77289476788	2458503559	6621681507	9612376466	2271325296	20632056287	20467793357	14096593396	9585936697	30322982965	11987463986	12278524519	3151779527	7428887933	8280836301	3943606432	18063930699	7744259275	3.3884e+08	5351297453	4027552004	2.99036e+06	13976718772	3.64995e+08	6.99159e+08	1440181763	9.86518e+06	3746196119	4.72941e+08	4.75639e+07	2282196867	2966487117	2.84538e+08	2177873590	2843095838	6145463880	2207405078	3016460675	1180084355	2356002692	6.01731e+08	669018924	2665049718	6.12491e+07	1903243363	1210377249
2001	76407218961	82410875358	151326807053	75595914051	2435955555	6396494355	10165228036	2306662311	20419324986	20654927089	13992837054	9531501624	30584726009	12218513641	12724128324	2973306907	7225504301	8163703524	3887705424	17654854939	8196410511	3.29934e+08	5194787255	3949502549	3.06783e+06	14516560141	3.69503e+08	6.87585e+08	1410764315	9.34883e+06	3450944451	4.44073e+08	4.59668e+07	2406365895	3005326818	1.55759e+08	2177731329	3456315645	5724404365	2173625446	3188670280	1164962671	2023464284	5.84001e+08	6.24824e+08	2748702362	6.09071e+07	1846972417	1128518425
2002	75918840660	80142570518	156443812808	73749369181	2480761675	6311062385	10429312779	2332326361	19971383367	20448025660	13976116801	9696159757	30362729581	12292583252	11999787172	3008785820	6853454231	8189537631	3881905607	16939499353	7626068684	3.12783e+08	5004494862	3821926326	3.06695e+06	16328068497	3.63651e+08	6.92032e+08	1373546588	8.68573e+06	3447886897	4.38066e+08	4.78057e+07	2276703554	3087837283	1.95576e+08	2171474644	3513671673	5765158613	2128388704	3144000786	1078476781	1847351482	5.79569e+08	5.96806e+08	2867257823	6.25241e+07	1840400076	1123773074
2003	75506760737	78970915113	155883922132	72150853925	2468672738	6398190769	10441185055	2342349866	22208662569	20522154703	14344736103	9519848944	29613545862	12057858326	11231923200	2909057546	6601747469	8366498230	3775993536	16468240489	7551003764	3.19738e+08	4839517452	4040300955	3.01976e+06	16422631526	3.43693e+08	7.16296e+08	1332702725	8.6523e+06	3456273455	4.44817e+08	4.71614e+07	2475255982	3252469964	1.68783e+08	2241667422	3562413814	5787344490	2167222571	3162538165	9.4974e+08	1901227519	5.51501e+08	6.0519e+08	2584366636	7.40552e+07	1836585225	1161701187
2004	74645804380	77325215206	156691887582	71384292920	2528214514	6517781620	10417678883	2271705747	24181879754	20195229161	14087154622	9044607512	30211918416	12278239363	13439408130	2987539166	6742616523	8530279370	3776353173	16844152996	7497524770	3.21484e+08	4758482381	4070396307	3.03489e+06	17771810966	3.21211e+08	7.27316e+08	1296346961	8.2429e+06	3370987905	4.48472e+08	4.77134e+07	2385277253	3409099420	1.91609e+08	2190853418	3251302285	5974562785	2148058753	3208393960	9.37087e+08	1918617348	5.31845e+08	5.96515e+08	2593473639	7.43269e+07	1773658784	1138995853
2005	73911296783	76553473741	157450680185	68503957494	2500624895	6505599743	10381203566	2215265853	22676039666	20558403003	14179134535	8844953407	30827215111	12225110501	13335428282	2931108362	6517489432	8750234271	3702008428	16818449402	7729029855	2.90189e+08	4731917426	3918965158	2.54145e+06	18141438908	3.1162e+08	7.12456e+08	1192401639	7.68216e+06	3295913808	4.50029e+08	4.85566e+07	2433943034	3478984645	213271813	2160557725	3550483797	5533701511	2127945844	3286018777	8.94774e+08	1724872052	6.47337e+08	5.92084e+08	2500336579	8.29959e+07	1711891794	1068673521
2006	73973782765	75855845119	150373206515	67612342989	2552483567	6339678998	10658460168	2187276851	20717710906	20105989961	14064823066	8374055009	30713493694	11820460760	12273626663	3102574329	6638674240	8756246085	3524964270	16383984652	7725355533	3.16969e+08	4727445589	3811338826	2.59211e+06	18795890032	296684265	7.19265e+08	1125362616	7.91428e+06	3226287965	4.45634e+08	5.06658e+07	2278515617	3412313105	1.86073e+08	2081028797	3309182145	5152035811	2068967778	3298606877	8.15404e+08	1581124120	5.83607e+08	5.79991e+08	2396845961	7.98762e+07	1781138859	1101262345
2007	72237198542	74641586196	144394773484	65388794559	2528749064	6140620975	10589670969	2147232392	20780062429	19737814601	14058116583	8238689608	30783675138	11343612837	11311495490	3087018034	6290700162	8761034022	3431637863	16204069041	7374955478	3.14841e+08	4756351761	3761234682	2.53264e+06	19534089213	2.91369e+08	7.03319e+08	1119438254	7.60918e+06	3178428101	4.39394e+08	5.10493e+07	2205675957	3492695686	1.68161e+08	2147268568	3399854394	5147000428	2025531338	3393951730	7.81219e+08	1652963936	5.88635e+08	5.53676e+08	2327354220	7.19185e+07	1780984259	1105019001
2008	70239907773	75301730521	143479386582	64745663187	2561172420	6242759158	10079741553	2141760108	21251835932	19477438315	13786554686	8355028796	30005455363	11361596801	11943890884	3092922832	6514377748	8598712494	3592664035	15961557060	7250658476	3.17051e+08	4755372237	3510583423	2.48513e+06	18806751307	2.72447e+08	712734908	1106662557	7.93708e+06	3216907353	4.54593e+08	5.35321e+07	2110449227	3565485065	246893377	2045125904	4059435076	5184156789	1995104901	3364117221	8.1293e+08	1496222208	5.87835e+08	5.52019e+08	2067360880	5.33648e+07	1801145533	1164927333
2009	69780939216	76005757821	145080790165	64706667606	2613547549	6171563052	9700449865	2042124114	21583433845	19567045929	13541606241	8345891458	30391862235	11232838939	13918615728	3139694622	6351750396	8700249016	3302538348	15971083262	7145605081	3.16656e+08	4588556222	4116462163	2.54023e+06	18472138326	2.81548e+08	7.07454e+08	1111129958	8.00906e+06	3208517896	4.63124e+08	5.53471e+07	2093771108	3749225021	2.6086e+08	2071370463	3788262980	5065315105	1981377956	3460516519	8.45503e+08	1528367851	5.61921e+08	5.46638e+08	2098857961	5.81262e+07	1820107218	1240291219
2010	67711977824	75542481481	139616964190	63847842977	2588995660	6160659337	9380068553	1892682537	20975245840	19176132539	13090401997	8066477981	29727247937	10949078947	12993397238	3099601023	5666794439	8569624476	3342137564	15354383721	7102588882	3.10883e+08	4625607078	4057817570	2.59974e+06	20265645508	2.84653e+08	7.10237e+08	1122140888	7.35365e+06	3124480624	4.55974e+08	5.48997e+07	2180982845	3507848052	2.16163e+08	2113463460	3939714438	5225589105	1765978273	3584962446	8.1085e+08	1519763912	5.69896e+08	5.94067e+08	2280204918	5.38829e+07	1810653274	1162333555
2011	66840416815	76279606979	138567136787	63658682865	2578834037	6097938419	9297394395	1874918838	20343820309	19015407128	13153640887	7638894844	29173195613	10418766425	15862165676	3120764433	5747959034	8659855936	3240691207	16031679200	7007953476	3.0352e+08	4412528275	4444130054	2.49949e+06	20423102591	2.76776e+08	6.97628e+08	1090014808	6.77847e+06	2988342117	4.52688e+08	5.58879e+07	2127395182	3488647330	2.69479e+08	2126108239	3798744905	5071515699	1776172934	3666184787	8.18229e+08	1343792876	5.23374e+08	5.81512e+08	2099339085	5.53618e+07	1846043820	1244781997
2012	65282459099	74888011433	140169667377	62299006736	2540272891	6159254591	9182426550	1813031934	20104056201	19014293511	12303961598	7522417016	29812772298	10140034676	16040945604	3183449293	5701266143	8707702577	3457166225	16383519681	7007053983	2.94723e+08	4410768724	4480105203	2.6813e+06	20658341028	2.70773e+08	6.94176e+08	1097628450	6.08721e+06	2939288168	4.30018e+08	5.76773e+07	2136659645	3599908772	2.28921e+08	2156097167	3947541038	5071515699	1806448609	3925435562	7.97479e+08	1303458974	5.64621e+08	5.74995e+08	1919303468	5.60531e+07	1925935708	1234252836
2013	64742513660	75206604708	137588880379	62680651759	2559763555	6194499996	8916725265	1774208670	20026459329	19076602209	11915455688	7451891601	29717217482	10083231236	15566089023	3216725879	5635744615	8776725041	3333858537	16156004956	7081898787	2.93481e+08	4319457755	4534524626	2.53203e+06	20495095780	2.63769e+08	6.75473e+08	1095223062	5.70486e+06	3140096231	4.34172e+08	5.64099e+07	2220560761	3617166359	2.28754e+08	2206982938	4138735034	5003545340	2070787810	4224263329	7.93988e+08	1384401456	5.64151e+08	5.5056e+08	1840798834	5.44366e+07	1515101031	1171718403
2014	64671744630	74491810680	135074011326	62280949053	2591153928	6084832919	9061029003	2025552391	19303135035	19619194923	11020384642	7614296615	31133225061	10733169647	15614506958	3241809047	5748119235	8733754872	3335307915	17049908498	7338776619	2.87326e+08	4147079062	4417265738	2.56203e+06	20442624156	241325552	6.54592e+08	1120320623	5.41873e+06	3165540391	4.29443e+08	6.01799e+07	2088318929	3579331204	3.05882e+08	2127622771	4077657499	5052795863	2062280790	4162290450	7.914e+08	1325855417	5.64042e+08	5.10124e+08	1948195427	5.3924e+07	1495690828	1199680089
2015	63333536991	73953066118	133769404853	62468051429	2593335829	6031029783	9108752120	2044578945	19360484938	20600497535	11845548375	7648182708	31998925355	10655625060	15151936465	3067095194	5783388232	8804700800	3270207927	16598279368	7533153079	2.91587e+08	4191777853	4696940667	2.57479e+06	19713154033	2.43923e+08	6.61492e+08	1130307065	4.71486e+06	3262206164	4.29537e+08	6.79051e+07	2138575932	3405124083	1.98442e+08	2306250645	4100799112	5092742009	2091218736	3862941649	8.09009e+08	1308668223	5.27112e+08	5.12283e+08	1969821501	6.60635e+07	1509127375	1172487855
2016	62995007301	73685588491	131331838452	63445651840	2591847581	5938623063	8999211160	2106600806	19977959481	20258705138	12599063519	7610651231	32253253538	10489753717	14728085426	3050374758	5683383169	8691489189	3351609361	16991727117	7506473816	280262410	4243832693	4956985110	2.75483e+06	20207948638	2.45123e+08	6.57227e+08	1149488109	4.10314e+06	3274049169	4.48297e+08	6.69882e+07	2263457601	3408695297	2.02681e+08	2158337418	4104504973	5073081949	2072137444	3839794145	7.64089e+08	1311252098	5.26446e+08	514526443	1802813506	5.46363e+07	1492154596	1127038728
[truncated: 87 more columns]

## Sheet: 6. Weighted RIW LU
RIW Protein Supply (LU) Per (ALU) per capita 2000	China	United States	India	Russian Federation	Japan	Germany	Islamic Republic of Iran	Saudi Arabia	Indonesia	Canada	Mexico	South Africa	Brazil	Turkey	Australia	United Kingdom	Poland	France	Italy	Kazakhstan	Afghanistan	Albania	Algeria	Angola	Antigua and Barbuda	Argentina	Armenia	Austria	Azerbaijan	Barbados	Belarus	Belgium	Belize	Benin	Bolivia	Botswana	Bulgaria	Burkina Faso	Cameroon	Central African Republic	Chad	Chile	Colombia	Congo	Croatia	Cuba	Cyprus	Czechia	Denmark
2000	1.0659e-09	9.93041e-10	5.36001e-10	1.04466e-09	3.28417e-08	1.21935e-08	8.39973e-09	3.55481e-08	3.9134e-09	3.9448e-09	5.72772e-09	8.4229e-09	2.66271e-09	6.73549e-09	6.57582e-09	2.56177e-08	1.08686e-08	9.75039e-09	2.0474e-08	4.46976e-09	1.0426e-08	2.38288e-07	1.50882e-08	2.00473e-08	2.70006e-05	5.77685e-09	2.21212e-07	1.15484e-07	5.60633e-08	8.18449e-06	2.15529e-08	1.70722e-07	1.69754e-06	3.53788e-08	2.72179e-08	2.83763e-07	3.70735e-08	2.83991e-08	1.31384e-08	3.65775e-08	2.67669e-08	6.842e-08	3.42705e-08	1.34182e-07	1.20686e-07	3.02964e-08	1.31825e-06	4.24231e-08	6.67076e-08
2001	1.05672e-09	9.79742e-10	5.33557e-10	1.06807e-09	3.31457e-08	1.26228e-08	7.9429e-09	3.50036e-08	3.95417e-09	3.90906e-09	5.7702e-09	8.47101e-09	2.63993e-09	6.60812e-09	6.34554e-09	2.71554e-08	1.11745e-08	9.89029e-09	2.07684e-08	4.57333e-09	9.85082e-09	2.4472e-07	1.55428e-08	2.04434e-08	2.63187e-05	5.56202e-09	2.18514e-07	1.17428e-07	5.72324e-08	8.63653e-06	2.33969e-08	1.8182e-07	1.75651e-06	3.35533e-08	2.68661e-08	5.18374e-07	3.70759e-08	2.33605e-08	1.41048e-08	3.7146e-08	2.53213e-08	6.93081e-08	3.99026e-08	1.38256e-07	1.29223e-07	2.93744e-08	1.32565e-06	4.37155e-08	7.15464e-08
2002	1.06352e-09	1.00747e-09	5.16105e-10	1.09481e-09	3.2547e-08	1.27936e-08	7.74178e-09	3.46184e-08	4.04285e-09	3.94862e-09	5.7771e-09	8.32715e-09	2.65923e-09	6.5683e-09	6.72857e-09	2.68352e-08	1.17811e-08	9.85909e-09	2.07994e-08	4.76646e-09	1.05876e-08	2.58139e-07	1.61338e-08	2.11258e-08	2.63263e-05	4.94495e-09	2.2203e-07	1.16673e-07	5.87832e-08	9.29587e-06	2.34176e-08	1.84313e-07	1.68895e-06	3.54642e-08	2.61482e-08	4.12839e-07	3.71828e-08	2.29792e-08	1.40051e-08	3.79355e-08	2.56811e-08	7.48662e-08	4.37066e-08	1.39313e-07	1.35289e-07	2.81598e-08	1.29136e-06	4.38717e-08	7.18485e-08
2003	1.06933e-09	1.02242e-09	5.17959e-10	1.11906e-09	3.27064e-08	1.26194e-08	7.73297e-09	3.44703e-08	3.63558e-09	3.93435e-09	5.62864e-09	8.48137e-09	2.7265e-09	6.69616e-09	7.18856e-09	2.77552e-08	1.22303e-08	9.65056e-09	2.13828e-08	4.90286e-09	1.06928e-08	2.52523e-07	1.66838e-08	1.9984e-08	2.67377e-05	4.91647e-09	2.34923e-07	1.12721e-07	6.05847e-08	9.33178e-06	2.33608e-08	1.81516e-07	1.71202e-06	3.26194e-08	2.48246e-08	4.78374e-07	3.60185e-08	2.26648e-08	1.39514e-08	3.72557e-08	2.55306e-08	8.50142e-08	4.2468e-08	1.46403e-07	1.33415e-07	3.12422e-08	1.09029e-06	4.39628e-08	6.95027e-08
2004	1.08166e-09	1.04418e-09	5.15288e-10	1.13108e-09	3.19361e-08	1.23879e-08	7.75042e-09	3.55422e-08	3.33892e-09	3.99804e-09	5.73156e-09	8.92702e-09	2.6725e-09	6.57598e-09	6.00781e-09	2.70261e-08	1.19748e-08	9.46527e-09	2.13808e-08	4.79344e-09	1.07691e-08	2.51153e-07	1.69679e-08	1.98363e-08	2.66044e-05	4.54323e-09	2.51366e-07	1.11013e-07	6.22838e-08	9.79527e-06	2.39519e-08	1.80036e-07	1.69222e-06	3.38499e-08	2.36841e-08	4.21387e-07	3.68539e-08	2.48336e-08	1.35142e-08	3.75881e-08	2.51657e-08	8.61621e-08	4.20831e-08	1.51814e-07	1.35355e-07	3.11325e-08	1.0863e-06	4.55225e-08	7.08882e-08
2005	1.09241e-09	1.05471e-09	5.12804e-10	1.17864e-09	3.22885e-08	1.24111e-08	7.77765e-09	3.64477e-08	3.56065e-09	3.92742e-09	5.69438e-09	9.12853e-09	2.61916e-09	6.60455e-09	6.05465e-09	2.75464e-08	1.23884e-08	9.22734e-09	2.18102e-08	4.80076e-09	1.04465e-08	2.78237e-07	1.70631e-08	2.06027e-08	3.17699e-05	4.45066e-09	2.59102e-07	1.13328e-07	6.77133e-08	1.05103e-05	2.44974e-08	1.79414e-07	1.66283e-06	3.31731e-08	2.32083e-08	3.78585e-07	3.73706e-08	2.2741e-08	1.45908e-08	3.79434e-08	2.45712e-08	9.02366e-08	4.68101e-08	1.24729e-07	1.36368e-07	3.22922e-08	9.72836e-07	4.7165e-08	7.55529e-08
2006	1.09149e-09	1.06441e-09	5.3694e-10	1.19418e-09	3.16325e-08	1.27359e-08	7.57533e-09	3.69141e-08	3.89722e-09	4.01579e-09	5.74066e-09	9.64185e-09	2.62886e-09	6.83065e-09	6.57845e-09	2.6024e-08	1.21623e-08	9.22101e-09	2.29056e-08	4.92807e-09	1.04515e-08	2.5473e-07	1.70793e-08	2.11845e-08	3.11489e-05	4.29569e-09	2.72146e-07	1.12255e-07	7.1747e-08	1.0202e-05	2.50261e-08	1.81183e-07	1.59361e-06	3.5436e-08	2.36618e-08	4.33923e-07	3.87988e-08	2.43992e-08	1.56717e-08	3.9025e-08	2.44774e-08	9.90202e-08	5.10658e-08	1.38349e-07	1.39212e-07	3.36865e-08	1.01083e-06	4.53313e-08	7.33171e-08
2007	1.11773e-09	1.08172e-09	5.59171e-10	1.23479e-09	3.19294e-08	1.31487e-08	7.62454e-09	3.76025e-08	3.88552e-09	4.0907e-09	5.7434e-09	9.80027e-09	2.62286e-09	7.11779e-09	7.138e-09	2.61551e-08	1.2835e-08	9.21597e-09	2.35285e-08	4.98279e-09	1.09481e-08	2.56451e-07	1.69755e-08	2.14667e-08	3.18803e-05	4.13336e-09	2.7711e-07	1.14801e-07	7.21267e-08	1.06111e-05	2.54029e-08	1.83756e-07	1.58164e-06	3.66062e-08	2.31172e-08	4.80144e-07	3.76019e-08	2.37485e-08	1.56871e-08	3.98618e-08	2.37898e-08	1.03353e-07	4.88464e-08	1.37167e-07	1.45828e-07	3.46924e-08	1.12268e-06	4.53353e-08	7.30679e-08
2008	1.14951e-09	1.07224e-09	5.62739e-10	1.24706e-09	3.15252e-08	1.29336e-08	8.01027e-09	3.76986e-08	3.79927e-09	4.14538e-09	5.85653e-09	9.66381e-09	2.69089e-09	7.10652e-09	6.76006e-09	2.61052e-08	1.23943e-08	9.38994e-09	2.2474e-08	5.05849e-09	1.11357e-08	2.54663e-07	1.6979e-08	2.29994e-08	3.24898e-05	4.29321e-09	2.96357e-07	1.13284e-07	7.29594e-08	1.01727e-05	2.50991e-08	1.77613e-07	1.50828e-06	3.82579e-08	2.26453e-08	3.27029e-07	3.94799e-08	1.98898e-08	1.55746e-08	4.04698e-08	2.40008e-08	9.93215e-08	5.39635e-08	1.37354e-07	1.46266e-07	3.90553e-08	1.51301e-06	4.48278e-08	6.93103e-08
2009	1.15707e-09	1.06231e-09	5.56527e-10	1.24781e-09	3.08934e-08	1.30828e-08	8.32347e-09	3.9538e-08	3.7409e-09	4.1264e-09	5.96247e-09	9.67439e-09	2.65668e-09	7.18798e-09	5.80097e-09	2.57163e-08	1.27117e-08	9.28036e-09	2.44483e-08	5.05547e-09	1.12994e-08	2.54982e-07	1.75963e-08	1.96143e-08	3.17851e-05	4.37098e-09	2.86777e-07	1.1413e-07	7.2666e-08	1.00813e-05	2.51647e-08	1.74341e-07	1.45882e-06	3.85627e-08	2.15355e-08	3.09521e-07	3.89797e-08	2.13136e-08	1.59401e-08	4.07501e-08	2.33322e-08	9.54951e-08	5.28285e-08	1.43688e-07	1.47706e-07	3.84692e-08	1.38907e-06	4.43608e-08	6.50987e-08
2010	1.19242e-09	1.06882e-09	5.78307e-10	1.26459e-09	3.11864e-08	1.3106e-08	8.60776e-09	4.26598e-08	3.84937e-09	4.21052e-09	6.16799e-09	1.00095e-08	2.71607e-09	7.37426e-09	6.21403e-09	2.6049e-08	1.42482e-08	9.42181e-09	2.41586e-08	5.25852e-09	1.13679e-08	2.59716e-07	1.74553e-08	1.98977e-08	3.10575e-05	3.98415e-09	2.83649e-07	1.13682e-07	7.1953e-08	1.09798e-05	2.58415e-08	1.77075e-07	1.47071e-06	3.70207e-08	2.30174e-08	3.73521e-07	3.82034e-08	2.04942e-08	1.54512e-08	4.57205e-08	2.25222e-08	9.95762e-08	5.31276e-08	1.41677e-07	1.35913e-07	3.54097e-08	1.49846e-06	4.45924e-08	6.94649e-08
2011	1.20797e-09	1.05849e-09	5.82688e-10	1.26835e-09	3.13093e-08	1.32408e-08	8.6843e-09	4.30639e-08	3.96884e-09	4.2461e-09	6.13833e-09	1.05698e-08	2.76766e-09	7.74961e-09	5.09019e-09	2.58723e-08	1.4047e-08	9.32364e-09	2.49149e-08	5.03637e-09	1.15214e-08	2.66017e-07	1.82982e-08	1.81681e-08	3.23032e-05	3.95343e-09	2.91721e-07	1.15737e-07	7.40737e-08	1.19114e-05	2.70188e-08	1.7836e-07	1.4447e-06	3.79532e-08	2.3144e-08	2.99621e-07	3.79762e-08	2.12548e-08	1.59206e-08	4.54581e-08	2.20233e-08	9.86783e-08	6.00847e-08	1.54271e-07	1.38847e-07	3.84604e-08	1.45843e-06	4.37375e-08	6.48639e-08
2012	1.2368e-09	1.07816e-09	5.76026e-10	1.29603e-09	3.17845e-08	1.3109e-08	8.79304e-09	4.45339e-08	4.01617e-09	4.24635e-09	6.56223e-09	1.07334e-08	2.70828e-09	7.96264e-09	5.03346e-09	2.53629e-08	1.4162e-08	9.27241e-09	2.33548e-08	4.92821e-09	1.15229e-08	2.73957e-07	1.83055e-08	1.80222e-08	3.01128e-05	3.90842e-09	2.98188e-07	1.16313e-07	7.35599e-08	1.32641e-05	2.74697e-08	1.87763e-07	1.39988e-06	3.77886e-08	2.24287e-08	3.52704e-07	3.74479e-08	2.04536e-08	1.59206e-08	4.46962e-08	2.05688e-08	1.01246e-07	6.1944e-08	1.43001e-07	1.40421e-07	4.20681e-08	1.44044e-06	4.19232e-08	6.54172e-08
2013	1.24712e-09	1.07359e-09	5.86831e-10	1.28814e-09	3.15425e-08	1.30344e-08	9.05505e-09	4.55084e-08	4.03174e-09	4.23248e-09	6.77619e-09	1.0835e-08	2.71699e-09	8.00749e-09	5.18701e-09	2.51005e-08	1.43267e-08	9.19949e-09	2.42186e-08	4.99761e-09	1.14011e-08	2.75117e-07	1.86925e-08	1.78059e-08	3.1888e-05	3.93955e-09	3.06107e-07	1.19533e-07	7.37214e-08	1.41531e-05	2.5713e-08	1.85967e-07	1.43133e-06	3.63608e-08	2.23217e-08	3.52962e-07	3.65845e-08	1.95087e-08	1.61368e-08	3.89907e-08	1.91137e-08	1.01691e-07	5.83222e-08	1.4312e-07	1.46653e-07	4.38622e-08	1.48322e-06	5.32911e-08	6.89085e-08
2014	1.24848e-09	1.0839e-09	5.97757e-10	1.29641e-09	3.11604e-08	1.32693e-08	8.91084e-09	3.98614e-08	4.18281e-09	4.11543e-09	7.32655e-09	1.06039e-08	2.59342e-09	7.52261e-09	5.17092e-09	2.49063e-08	1.40466e-08	9.24475e-09	2.42081e-08	4.73559e-09	1.1002e-08	2.8101e-07	1.94695e-08	1.82786e-08	3.15146e-05	3.94966e-09	3.34575e-07	1.23346e-07	7.20699e-08	1.49004e-05	2.55064e-08	1.88014e-07	1.34167e-06	3.86633e-08	2.25577e-08	2.63962e-07	3.79491e-08	1.98009e-08	1.59796e-08	3.91515e-08	1.93983e-08	1.02024e-07	6.08976e-08	1.43148e-07	1.58278e-07	4.14442e-08	1.49732e-06	5.39827e-08	6.73024e-08
2015	1.27486e-09	1.09179e-09	6.03586e-10	1.29252e-09	3.11342e-08	1.33877e-08	8.86416e-09	3.94905e-08	4.17042e-09	3.91939e-09	6.81618e-09	1.05569e-08	2.52325e-09	7.57735e-09	5.32878e-09	2.6325e-08	1.39609e-08	9.17026e-09	2.469e-08	4.86444e-09	1.07181e-08	2.76903e-07	1.92619e-08	1.71902e-08	3.13585e-05	4.09581e-09	3.31012e-07	1.22059e-07	7.14332e-08	1.71249e-05	2.47506e-08	1.87973e-07	1.18903e-06	3.77548e-08	2.37117e-08	4.06877e-07	3.50098e-08	1.96892e-08	1.58542e-08	3.86097e-08	2.09015e-08	9.98029e-08	6.16974e-08	1.53177e-07	1.57611e-07	4.09892e-08	1.22218e-06	5.3502e-08	6.88633e-08
2016	1.28171e-09	1.09576e-09	6.14789e-10	1.27261e-09	3.11521e-08	1.3596e-08	8.97205e-09	3.83278e-08	4.04152e-09	3.98552e-09	6.40852e-09	1.0609e-08	2.50336e-09	7.69717e-09	5.48214e-09	2.64693e-08	1.42066e-08	9.28971e-09	2.40903e-08	4.75181e-09	1.07562e-08	2.88092e-07	1.90256e-08	1.62884e-08	2.9309e-05	3.99553e-09	3.29392e-07	1.22852e-07	7.02412e-08	1.96779e-05	2.4661e-08	1.80107e-07	1.20531e-06	3.56717e-08	2.36869e-08	3.98366e-07	3.74091e-08	1.96714e-08	1.59157e-08	3.89653e-08	2.10275e-08	1.0567e-07	6.15758e-08	1.53371e-07	1.56924e-07	4.47863e-08	1.4778e-06	5.41106e-08	7.16403e-08
Cricket eco-potential LU (RIW weighted) - protein supply	China	United States	India	Russian Federation	Japan	Germany	Islamic Republic of Iran	Saudi Arabia	Indonesia	Canada	Mexico	South Africa	Brazil	Turkey	Australia	United Kingdom	Poland	France	Italy	Kazakhstan	Afghanistan	Albania	Algeria	Angola	Antigua and Barbuda	Argentina	Armenia	Austria	Azerbaijan	Barbados	Belarus	Belgium	Belize	Benin	Bolivia	Botswana	Bulgaria	Burkina Faso	Cameroon	Central African Republic	Chad	Chile	Colombia	Congo	Croatia	Cuba	Cyprus	Czechia	Denmark
2000	145417225543	156086211006	289178684868	148373301646	4719611329	12711701365	18452965295	4360283538	39607543462	39292206443	27061356746	18402208634	58211302305	23012442105	23571193621	6050499419	14261302780	15896795701	7570576630	34677489742	14866723973	6.50474e+08	10272933706	7731727697	5.74062e+06	26831232357	7.00684e+08	1342181891	2764729845	1.89383e+07	7191606282	9.07909e+08	9.13088e+07	4381153791	5694791920	5.46231e+08	4180883461	5457916575	11797502117	4237575321	5790726607	2265418518	4522839494	1155148190	1284321628	5116119840	1.1758e+08	3653673351	2323572059
2001	146679623385	158204896403	290503428449	145122154073	4676325721	12279407571	19514279412	4428120322	39199161275	39651448746	26862174767	18297709137	58713772773	23455990200	24426623242	5707883931	13870865399	15671934860	7463262964	33892183338	15734722756	6.33376e+08	9972479675	7581895458	5.88935e+06	27867570672	7.09338e+08	1319963147	2708256906	1.7947e+07	6624809007	8.5249e+08	8.8243e+07	4619522186	5769352841	2.99012e+08	4180610360	6635120137	10989190390	4172728260	6121318930	2236389285	3884462531	1121112110	1199479828	5276708571	1.16924e+08	3545649510	2166426939
2002	145742079180	153850411262	300326590281	141577325328	4762340432	12115403051	20021245262	4477387830	38339243733	39254258217	26830076746	18613804830	58287604239	23598182296	23036099036	5775993119	13156637543	15721528825	7452129003	32518908805	14639832436	600452774	9607173663	7336986240	5.88764e+06	31345139508	6.98104e+08	1328499889	2636809702	1.66741e+07	6618939393	8.4096e+08	9.1773e+07	4370608228	5927748921	3.75449e+08	4168599346	6745227019	11067426685	4085886881	6035566501	2070361548	3546377205	1112603669	1145694271	5504300554	1.20028e+08	3533032528	2157317248
2003	144951005656	151601173875	299251763130	138508641258	4739133191	12282664191	20044036575	4496630042	42634168679	39396564407	27537718526	18275339382	56849389536	23147578752	21562023685	5584543857	12673433814	16061241674	7248808650	31614228937	14495729635	6.13805e+08	9290465049	7756201973	5.79705e+06	31526673003	6.59791e+08	1375079304	2558401371	1.66099e+07	6635039143	8.53919e+08	9.05361e+07	4751771105	6243795754	3.24014e+08	4303349051	6838797742	11110017112	4160436603	6071152873	1823224353	3649803516	1058722268	1161788925	4961231805	1.42164e+08	3525709125	2230128187
2004	143298220018	148441909008	300802821650	137037067222	4853436073	12512243821	19998911567	4361013893	46422171403	38768962512	27043237047	17363014143	57998090694	23570646204	25799752298	5735205727	12943861401	16375653797	7249499048	32335871548	14393065530	6.17155e+08	9134901296	7813976290	5.8261e+06	34116704871	6.16631e+08	1396234329	2488608885	1.5824e+07	6471315709	8.60937e+08	9.15959e+07	4579038131	6544478727	3.67833e+08	4205800953	6241554151	11469421752	4123647650	6159182655	1798934757	3683186927	1020988210	1145135940	4978714601	1.42686e+08	3404908672	2186540552
2005	141888179198	146960389997	302259482613	131507661477	4800472035	12488858162	19928889575	4252665722	43531396683	39466150593	27219811711	16979736368	59179281276	23468654251	25600141252	5626875005	12511682904	16797903194	7106778775	32286528128	14837487918	557078431	9083904314	7523272555	4.87884e+06	34826282945	5.9822e+08	1367708648	2289064118	1.47475e+07	6327195291	8.63924e+08	9.32146e+07	4672462268	6678638020	4.0942e+08	4147642038	6815895582	10623096412	4085036717	6308199711	1717706509	3311252346	1242698688	1136629285	4799918551	1.59328e+08	3286334027	2051542141
2006	142008134097	145621146075	288672792944	129796021117	4900025591	12170338620	20461141558	4198934985	39771975401	38597649219	27000366959	16075748491	58960969253	22691844515	23561791163	5956039760	12744322467	16809444126	6766905517	31452482252	14830434289	6.08488e+08	9075319689	7316661321	4.97609e+06	36082638638	569547444	1380780286	2160368705	1.51931e+07	6193533937	8.55488e+08	9.72635e+07	4374086862	6550648065	3.57206e+08	3994969643	6352666637	9890409344	3971815995	6332365201	1565337758	3035298152	1120356134	1113413295	4601246684	1.53339e+08	3419268240	2114103199
2007	138674397792	143290122332	277195941447	125527455258	4854462254	11788205149	20329086316	4122061277	39891672181	37890859678	26987492464	15815886318	59095697201	21776435281	21714779322	5926176202	12076313510	16818635573	6587745977	31107096639	14157768162	6.04403e+08	9130811126	7220475946	4.86193e+06	37499766225	5.59345e+08	1350167834	2148995654	1.46074e+07	6101656927	8.43509e+08	9.79998e+07	4234255913	6704959227	3.2282e+08	4122130725	6526730966	9880742875	3888430672	6515399570	1499712503	3173209689	1130007808	1062897314	4467842766	1.38063e+08	3418971451	2121314884
2008	134840180793	144557407312	275438665002	124292830196	4916705661	11984280734	19350170244	4111556085	40797340003	37391012989	26466172654	16039223700	57601741720	21810959259	22928794432	5937511695	12505709377	16507025480	6896869364	30641544215	13919154092	6.08646e+08	9128930726	6739298476	4.77072e+06	36103489125	5.23018e+08	1368243594	2124470034	1.52369e+07	6175525892	8.72686e+08	102766106	4051448306	6844693651	4.73963e+08	3926046537	7792933917	9952072274	3830020769	6458125994	1560589084	2872311190	1128472818	1059714884	3968731220	1.02445e+08	3457675230	2236321447
2009	133959094740	145908934833	278512893822	124217970029	5017250665	11847604931	18622040590	3920283974	41433911492	37563033528	25995942928	16021682670	58343530456	21563781637	26719691422	6027299920	12193512191	16701946051	6339912480	30659831750	13717482148	6.07887e+08	8808692524	7902409327	4.8765e+06	35461129584	5.4049e+08	1358105666	2133046144	1.53751e+07	6159420576	8.89064e+08	1.0625e+08	4019431170	7197420892	500774411	3976428451	7272362413	9723930829	3803669030	6643184592	1623119743	2934021469	1078724964	1049385106	4029196448	1.11585e+08	3494076147	2380998175
2010	129987291002	145019579089	268023938102	122569276687	4970118185	11826672972	18007001713	3633399637	40266367525	36812593587	25129762095	15485290113	57067664428	21019045035	24943541190	5950331878	10878596099	16451184950	6415931451	29475948112	13634903566	5.96805e+08	8879819385	7789828776	4.99074e+06	38904141404	5.4645e+08	1363448348	2154183926	1.41169e+07	5998093471	8.75337e+08	1.05391e+08	4186852324	6734047361	4.1497e+08	4057234756	7563105135	10031610262	3390164327	6882084553	1556596486	2917504409	1094034578	1140436001	4377329827	1.03439e+08	3475927326	2231342147
2011	128314147519	146434645518	266008575022	122206144325	4950610826	11706267063	17848291390	3599298507	39054214270	36504047575	25251162359	14664454929	56004045215	20000999330	30450741684	5990959465	11034408499	16624403094	6221183969	30776158316	13453231129	5.8267e+08	8470770096	8531436315	4.79829e+06	39206413179	5.31329e+08	1339243048	2092511202	1.30127e+07	5736747159	8.69029e+08	1.07288e+08	4083979607	6697187563	5.17321e+08	4081509052	7292484658	9735834165	3409735108	7038007811	1570760901	2579691234	1004725959	1116334589	4030120067	1.06279e+08	3543866874	2389619161
2012	125323322121	143763187069	269084967367	119595961866	4876584647	11823976269	17627586586	3480493662	38593936962	36501909754	23620025410	14440851399	57231846312	19465915494	30793947116	6111296154	10944771739	16716254719	6636753003	31451589642	13451504363	5.65782e+08	8467392270	8600498131	5.14731e+06	39658002515	5.19806e+08	1332616712	2107127178	1.16857e+07	5642577852	825509677	1.10724e+08	4101764680	6910777150	4.39461e+08	4139079065	7578129928	9735834165	3467855593	7535693849	1530927734	2502261881	1083908222	1103824012	3684504078	1.07606e+08	3697236048	2369406237
2013	124286784020	144374793436	264130607424	120328609241	4914001050	11891637189	17117517447	3405964293	38444973552	36621524321	22874207130	14305463128	57048408875	19356869421	29882360679	6175177515	10818989472	16848757761	6400038128	31014827585	13595184605	5.63397e+08	8292101785	8704967585	4.86077e+06	39344619149	5.06359e+08	1296712213	2102509532	1.09517e+07	6028070892	8.33483e+08	1.08291e+08	4262830405	6943906694	4.39141e+08	4236764937	7945166757	9605350856	3975309929	8109356191	1524226272	2657647890	1083005618	1056914130	3533798029	1.04502e+08	2908553034	2249358324
2014	124150928078	143002596932	259302790752	119561296370	4974261430	11681108317	17394538628	3888471088	37056401417	37663144420	21155931218	14617233490	59766731321	20604562015	29975309022	6223329898	11034716038	16766267544	6402820513	32730862230	14088315283	5.51582e+08	7961184863	8479864646	4.91835e+06	39243888901	4.63275e+08	1256625954	2150689546	1.04024e+07	6076916274	8.24405e+08	1.15528e+08	4008964574	6871274208	5.87205e+08	4084416511	7827915665	9699897527	3958978926	7990386301	1519257144	2545256533	1082796018	9.7929e+08	3739968231	1.03518e+08	2871291095	2303036624
2015	121581958874	141968364164	256798326008	119920478480	4978450045	11577821955	17486153122	3924996535	37166496541	39546959844	22740005435	14682284926	61428623938	20455698976	29087308299	5887930147	11102422249	16902463079	6277847481	31863865739	14461461515	5.59763e+08	8046993531	9016759115	4.94285e+06	37843518565	4.68261e+08	1269872566	2169860608	9.05116e+06	6262486425	8.24586e+08	1.30358e+08	4105443393	6536847237	3.80951e+08	4427330044	7872340828	9776582502	4014531360	7415723722	1553061654	2512262123	1011902157	9.83435e+08	3781483998	1.26823e+08	2897085354	2250835449
2016	120932080393	141454884966	252118907929	121797186755	4975593042	11400427946	17275866359	4044060458	38351867959	38890817913	24186535213	14610235413	61916860033	20137274273	28273637659	5855831776	10910441632	16685129732	6434114544	32619170912	14410245096	5.38022e+08	8146923676	9515968765	5.28847e+06	38793380204	4.70565e+08	1261684350	2206682630	7.87684e+06	6285221548	8.60599e+08	1.28598e+08	4345179853	6543702927	3.89089e+08	4143379694	7879455001	9738840908	3977900832	7371287251	1466827568	2517222410	1010622656	9.87741e+08	3460877254	1.04886e+08	2864502558	2163586353
Mealworm eco-potential LU (RIW weighted) - protein supply	China	United States	India	Russian Federation	Japan	Germany	Islamic Republic of Iran	Saudi Arabia	Indonesia	Canada	Mexico	South Africa	Brazil	Turkey	Australia	United Kingdom	Poland	France	Italy	Kazakhstan	Afghanistan	Albania	Algeria	Angola	Antigua and Barbuda	Argentina	Armenia	Austria	Azerbaijan	Barbados	Belarus	Belgium	Belize	Benin	Bolivia	Botswana	Bulgaria	Burkina Faso	Cameroon	Central African Republic	Chad	Chile	Colombia	Congo	Croatia	Cuba	Cyprus	Czechia	Denmark
2000	68139697362	73138977454	135503534723	69524857410	2211518521	5956457227	8646702383	2043144473	18559328269	18411567445	12680428003	8622918794	27276689590	10783184968	11045005114	2835146921	6682570458	7448930786	3547425682	16249200516	6966259111	3.04799e+08	4813697903	3622937952	2.68994e+06	12572596168	3.28327e+08	6.2892e+08	1295498894	8.87411e+06	3369847512	425428747	4.27856e+07	2052923870	2668469272	2.55953e+08	1959081069	2557474070	5528081153	1985645778	2713422409	1061531271	2119315048	541280084	6.01808e+08	2397314735	5.50959e+07	1712040616	1088780895
2001	68731232558	74131752424	136124283924	68001432583	2191235724	5753892722	9144013637	2074931477	18367968280	18579901435	12587095183	8573952353	27512137526	10991023021	11445842878	2674603935	6499619057	7343565347	3497140575	15881221134	7372986540	2.96788e+08	4672910960	3552729465	2.75963e+06	13058204245	3.32382e+08	6.18509e+08	1269036768	8.40963e+06	3104257279	3.9946e+08	4.13489e+07	2164618686	2703407076	1.40111e+08	1958953100	3109088875	5149321923	1955259700	2868331573	1047928734	1820183959	5.25331e+08	5.62053e+08	2472563507	5.47883e+07	1661422735	1015145733
2002	68291917489	72091324968	140727227433	66340394442	2231540552	5677043378	9381568022	2098017278	17965027564	18393785641	12572054672	8722068676	27312443199	11057651485	10794270148	2706518582	6164945708	7366804120	3491923416	15237731268	6859942128	2.81361e+08	4501735633	3437969746	2.75884e+06	14687725693	327118146	6.22509e+08	1235557992	7.81315e+06	3101506891	3.94057e+08	4.3003e+07	2047982423	2777628414	1.75928e+08	1953324971	3160682828	5185981936	1914567511	2828149645	9.70131e+08	1661763719	5.21345e+08	5.3685e+08	2579208705	5.62428e+07	1655510661	1010877108
2003	67921235747	71037375861	140223584233	64902468481	2220666088	5755418711	9392247590	2107033806	19977546265	18460467567	12903641913	8563470318	26638523626	10846507386	10103546969	2616809164	5938525793	7525986986	3396651434	14813815792	6792418344	2.87617e+08	4353332106	3634406125	2.71639e+06	14772788776	3.09165e+08	6.44336e+08	1198817365	7.78308e+06	3109050922	4.0013e+08	4.24235e+07	2226587970	2925721843	1.51827e+08	2016466075	3204528258	5205938986	1949500068	2844824730	8.54328e+08	1710227286	4.96097e+08	5.44392e+08	2324737200	6.66155e+07	1652079057	1044994904
2004	67146772386	69557005492	140950380235	64212917370	2274226207	5862995282	9371102885	2043486703	21752531026	18166385466	12671937463	8135972369	27176782755	11044748605	12089264577	2687406400	6065242926	7673314421	3396974941	15151963552	6744311932	2.89187e+08	4280437943	3661478051	2.73e+06	15986427579	2.88941e+08	6.54248e+08	1166113957	7.4148e+06	3032333290	4.03418e+08	4.29201e+07	2145648642	3066616064	1.72359e+08	1970756924	2924671471	5374349044	1932261476	2886073782	8.42946e+08	1725870107	4.78415e+08	5.36589e+08	2332929300	6.68599e+07	1595474302	1024570582
[truncated: 102 more rows]
[truncated: 87 more columns]

## Sheet: 7. Crickets integr EP
Cricket eco-potential GWP (RIW weighetd) - protein supply	China	United States	India	Russian Federation	Japan	Germany	Islamic Republic of Iran	Saudi Arabia	Indonesia	Canada	Mexico	South Africa	Brazil	Turkey	Australia	United Kingdom	Poland	France	Italy	Kazakhstan	Afghanistan	Albania	Algeria	Angola	Antigua and Barbuda	Argentina	Armenia	Austria	Azerbaijan	Barbados	Belarus	Belgium	Belize	Benin	Bolivia	Botswana	Bulgaria	Burkina Faso	Cameroon	Central African Republic	Chad	Chile	Colombia	Congo	Croatia	Cuba	Cyprus	Czechia	Denmark
[truncated: 89 more rows]
[truncated: 87 more columns]

[truncated: 6 more sheets: 8. Mealworm integr EP, 9. Cultured Meat integr EP, 10. Black solider Fly integr EP, 11. Chlorella integr EP, 12. House Fly integr EP, 13. Spirulina integr EP]
